# Supplementary material for: Hypervalent iodine promoted the synthesis of cycloheptatrienes and cyclopropanes
Source: Royal Society of Chemistry journal article supplement (doi:10.1039/d1sc05429e), 2021-12-08

*Supporting Information*

**Hypervalent iodine promoted the synthesis of cycloheptatrienes and  
cyclopropanes: based on carbocation-induced-cyclization strategy**

## Table of the contents

|                                                                                   |    |
|-----------------------------------------------------------------------------------|----|
| 1. Molecular structure and crystallographic data .....                            | 2  |
| 2. General methods .....                                                          | 5  |
| 3. Preparation of starting materials .....                                        | 5  |
| 4. General experimental procedure .....                                           | 12 |
| 5. Optimization of reaction conditions.....                                       | 12 |
| 6. Unsuccessful Substrates .....                                                  | 16 |
| 7. Gram-scale reaction .....                                                      | 16 |
| 8. Procedure for the follow-up transformation.....                                | 17 |
| 9. Study on "[PhI] of catalytic amount" .....                                     | 19 |
| 10. References .....                                                              | 21 |
| 11. Competition experiment between <b>I-4 (I-26)</b> and <b>I-12 (I-33)</b> ..... | 21 |
| 12. Characterization of compounds .....                                           | 22 |
| 13. Computational Details .....                                                   | 44 |
| 14. <sup>1</sup> H NMR and <sup>13</sup> C NMR spectra.....                       | 80 |

## 1. Molecular structure and crystallographic data

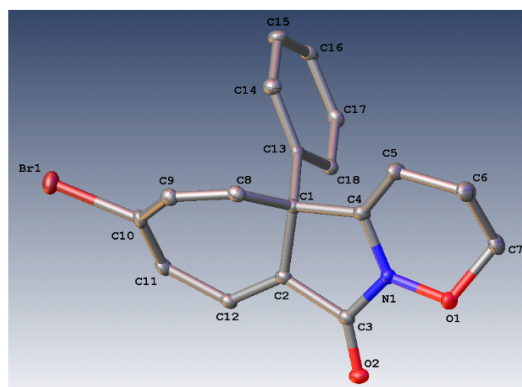

CCDC 1874173

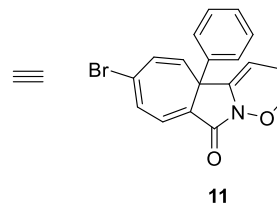

**Table S1.** Crystal data and structure refinement for **11**

|                                   |                                                                                          |
|-----------------------------------|------------------------------------------------------------------------------------------|
| Empirical formula                 | C <sub>18</sub> H <sub>14</sub> Br N O <sub>2</sub>                                      |
| Formula weight                    | 356.21                                                                                   |
| Temperature                       | 173.15 K                                                                                 |
| Wavelength                        | 1.54184 Å                                                                                |
| Crystal system                    | Monoclinic                                                                               |
| Space group                       | P 1 21/c 1                                                                               |
| Unit cell dimensions              | a = 8.86050(10) Å = 90°.<br>b = 21.1565(4) Å = 93.0250(10)°.<br>c = 7.84150(10) Å = 90°. |
| Volume                            | 1467.90(4) Å <sup>3</sup>                                                                |
| Z                                 | 4                                                                                        |
| Density (calculated)              | 1.612 Mg/m <sup>3</sup>                                                                  |
| Absorption coefficient            | 3.872 mm <sup>-1</sup>                                                                   |
| F(000)                            | 720                                                                                      |
| Crystal size                      | 0.321 x 0.211 x 0.189 mm <sup>3</sup>                                                    |
| Theta range for data collection   | 4.179 to 75.388°.                                                                        |
| Index ranges                      | -11 ≤ h ≤ 10, -26 ≤ k ≤ 22, -8 ≤ l ≤ 9                                                   |
| Reflections collected             | 13497                                                                                    |
| Independent reflections           | 2934 [R(int) = 0.0567]                                                                   |
| Completeness to theta = 67.684°   | 99.9 %                                                                                   |
| Absorption correction             | Semi-empirical from equivalents                                                          |
| Max. and min. transmission        | 1.00000 and 0.37218                                                                      |
| Refinement method                 | Full-matrix least-squares on F <sup>2</sup>                                              |
| Data / restraints / parameters    | 2934 / 0 / 199                                                                           |
| Goodness-of-fit on F <sup>2</sup> | 1.059                                                                                    |

Final R indices [I>2sigma(I)]

R1 = 0.0379, wR2 = 0.1027

R indices (all data)

R1 = 0.0413, wR2 = 0.1054

Extinction coefficient

n/a

Largest diff. peak and hole

0.752 and -0.936 e.Å<sup>-3</sup>

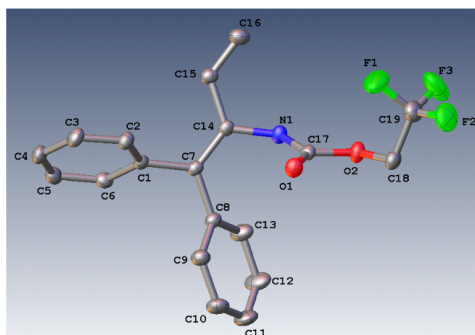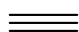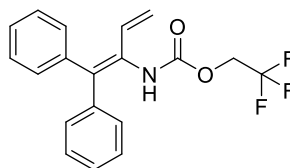

**64**

CCDC:1911414

**Table S2.** Crystal data and structure refinement for **64**

|                                 |                                                                                                              |
|---------------------------------|--------------------------------------------------------------------------------------------------------------|
| Empirical formula               | C <sub>19</sub> H <sub>16</sub> F <sub>3</sub> N O <sub>2</sub>                                              |
| Formula weight                  | 347.33                                                                                                       |
| Temperature                     | 169.99(13) K                                                                                                 |
| Wavelength                      | 1.54184 Å                                                                                                    |
| Crystal system                  | Triclinic                                                                                                    |
| Space group                     | P -1                                                                                                         |
| Unit cell dimensions            | a = 9.42120(10) Å = 94.9390(10)°.<br>b = 10.76290(10) Å = 96.7790(10)°.<br>c = 18.7421(2) Å = 110.5760(10)°. |
| Volume                          | 1750.05(3) Å <sup>3</sup>                                                                                    |
| Z                               | 4                                                                                                            |
| Density (calculated)            | 1.318 Mg/m <sup>3</sup>                                                                                      |
| Absorption coefficient          | 0.913 mm <sup>-1</sup>                                                                                       |
| F(000)                          | 720                                                                                                          |
| Crystal size                    | 0.322 x 0.235 x 0.211 mm <sup>3</sup>                                                                        |
| Theta range for data collection | 2.397 to 75.509°.                                                                                            |
| Index ranges                    | -10<=h<=11, -13<=k<=13, -23<=l<=23                                                                           |
| Reflections collected           | 63483                                                                                                        |
| Independent reflections         | 6919 [R(int) = 0.0185]                                                                                       |
| Completeness to theta = 67.684° | 99.7 %                                                                                                       |
| Absorption correction           | Semi-empirical from equivalents                                                                              |
| Max. and min. transmission      | 1.00000 and 0.83841                                                                                          |



|                                   |                                             |
|-----------------------------------|---------------------------------------------|
| Refinement method                 | Full-matrix least-squares on F <sup>2</sup> |
| Data / restraints / parameters    | 6919 / 0 / 451                              |
| Goodness-of-fit on F <sup>2</sup> | 1.055                                       |
| Final R indices [I > 2σ(I)]       | R1 = 0.0428, wR2 = 0.1063                   |
| R indices (all data)              | R1 = 0.0446, wR2 = 0.1081                   |
| Extinction coefficient            | n/a                                         |
| Largest diff. peak and hole       | 0.326 and -0.432 e.Å <sup>-3</sup>          |

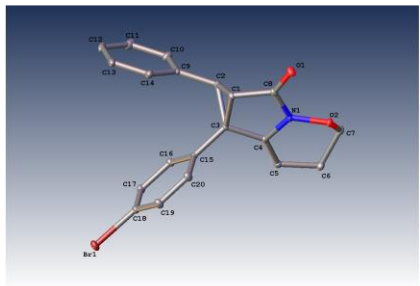

CCDC: 1883915

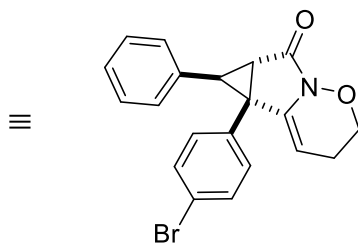

**85**

**Table S3.** Crystal data and structure refinement for **85**.

|                                 |                                                                                       |
|---------------------------------|---------------------------------------------------------------------------------------|
| Empirical formula               | C <sub>20</sub> H <sub>16</sub> Br N O <sub>2</sub>                                   |
| Formula weight                  | 382.25                                                                                |
| Temperature                     | 170.00(10) K                                                                          |
| Wavelength                      | 1.54184 Å                                                                             |
| Crystal system                  | Monoclinic                                                                            |
| Space group                     | P 1 21/c 1                                                                            |
| Unit cell dimensions            | a = 7.95590(10) Å = 90°<br>b = 6.80800(10) Å = 91.2510(10)°<br>c = 30.8630(2) Å = 90° |
| Volume                          | 1671.26(3) Å <sup>3</sup>                                                             |
| Z                               | 4                                                                                     |
| Density (calculated)            | 1.519 Mg/m <sup>3</sup>                                                               |
| Absorption coefficient          | 3.444 mm <sup>-1</sup>                                                                |
| F(000)                          | 776                                                                                   |
| Crystal size                    | 0.289 x 0.255 x 0.251 mm <sup>3</sup>                                                 |
| Theta range for data collection | 2.864 to 75.356°                                                                      |
| Index ranges                    | -9 ≤ h ≤ 9, -8 ≤ k ≤ 8, -38 ≤ l ≤ 38                                                  |
| Reflections collected           | 29345                                                                                 |
| Independent reflections         | 3324 [R(int) = 0.0247]                                                                |
| Completeness to theta = 67.684° | 99.3 %                                                                                |

|                                   |                                             |
|-----------------------------------|---------------------------------------------|
| Absorption correction             | Semi-empirical from equivalents             |
| Max. and min. transmission        | 1.00000 and 0.61350                         |
| Refinement method                 | Full-matrix least-squares on F <sup>2</sup> |
| Data / restraints / parameters    | 3324 / 0 / 217                              |
| Goodness-of-fit on F <sup>2</sup> | 1.125                                       |
| Final R indices [I > 2σ(I)]       | R1 = 0.0273, wR2 = 0.0646                   |
| R indices (all data)              | R1 = 0.0277, wR2 = 0.0655                   |
| Extinction coefficient            | n/a                                         |
| Largest diff. peak and hole       | 0.337 and -0.487 e.Å <sup>-3</sup>          |

## 2. General methods

Unless noted, all commercial reagents and solvents were used without further purification. Melting points were recorded on a RY-1 microscopic melting apparatus and uncorrected. NMR spectra were recorded in CDCl<sub>3</sub> or DMSO on 400 MHz or 500 MHz spectrometers. The following abbreviations are used for multiplicities: s = singlet, d = doublet, t = triplet, q = quartet, dd = doublet of doublets, and m = multiplet. Mass spectra were obtained on an Ultima Global spectrometer with an ESI source. The X-ray single-crystal diffraction was performed on Saturn 724+ instrument. Silica gel (200–300 mesh) for column chromatography and silica GF254 for TLC were produced by Qingdao Marine Chemical Company (China).

## 3. Preparation of starting materials

General procedure A for the synthesis of substrate I-3 ~ I-44 and II-66~ II-95<sup>[1]</sup>

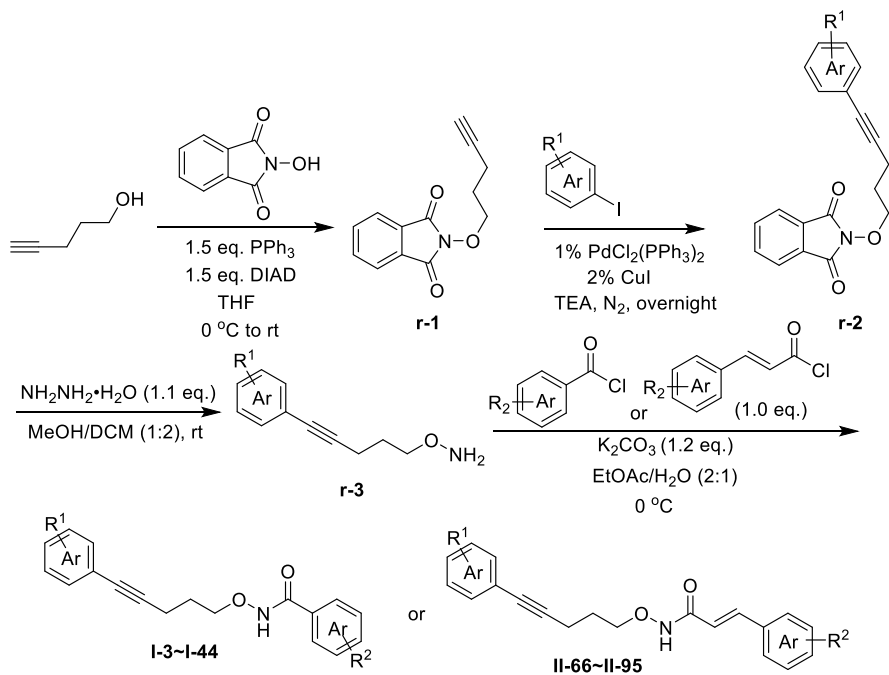

1) To a 50 mL Schlenk tube, under N<sub>2</sub>, was added *N*-Hydroxyphthalimide (6.5 mmol, 1.3 equiv.),

triphenylphosphine (PPh<sub>3</sub>, 7.5 mmol, 1.5 equiv.), 30 mL of anhydrous THF, and then alcohol (5 mmol, 1.0 equiv.) was added. The tube is immersed in an ice bath, and diisopropyl azodicarboxylate (DIAD, 7.5 mmol, 1.5 equiv.) in 5 mL of anhydrous THF was added dropwise, upon completion of the addition, the flask is removed from the ice bath and the solution is allowed to stir at room temperature overnight. The solvent was removed and the residue purified by flash column chromatography on silica gel (using 30% EtOAc/petroleum ether as eluent) to give compound **r-1**.

2) To a 50 mL Schlenk tube, under N<sub>2</sub>, was added PdCl<sub>2</sub>(PPh<sub>3</sub>)<sub>2</sub> (0.05 mmol, 0.01 equiv.), CuI (0.1 mmol, 0.02 equiv.), iodobenzene (6 mmol, 1.2 equiv.), compound **r-1** (5 mmol, 1.0 equiv.) and anhydrous TEA (10 mL), then the tube was placed in a pre-heated oil bath (60 °C). The reaction was stirred overnight and then cooled to room temperature and checked by TLC. The reaction is filtered over celite, washing with dichloromethane. The solvent was removed and the residue purified by flash column chromatography on silica gel (using 30% EtOAc/petroleum ether as eluent) to give compound **r-2**.

3) In a 50 mL round-bottom flask was charged alkoxyphthalimide starting material (5.0 mmol), solvent 20 mL [MeOH/DCM (ratio 1:2)], and then slowly added hydrazine monohydrate (5.5 mmol, 1.1 equiv.), then stirred at room temperature for 1 h. Upon completion (indicated by TLC), the solvent was then removed under reduce pressure. The residue was washed with DCM and filtered, collect the DCM part and removed the solvent to give the crude *O*-alkoxylamine **r-3**, which was used in next step without further purification.

4) The crude *O*-alkoxylamine which was obtained in the previous step was added to a biphasic mixture of K<sub>2</sub>CO<sub>3</sub> (10 mmol, 2.0 equiv.) in a 2:1 mixture of EtOAc: H<sub>2</sub>O (0.2 M). The resulting solution was cooled to 0 °C followed by dropwise addition of the acid chloride dissolved in a minimum amount of EtOAc. The flask containing the acid chloride was then rinsed with additional EtOAc. The reaction was allowed to stir at same temperature for 1 h. Upon completion (indicated by TLC), the phases were separated and the aqueous phase was extracted twice with EtOAc. The combined organic layers were dried over Na<sub>2</sub>SO<sub>4</sub>, filtered, and evaporated under reduced pressure. The residue was purified by flash column chromatography on silica gel (using 30% EtOAc/petroleum ether as eluent) to give product **I-3~I-44** and **II-66 ~ II-95**.

5) Acid chloride was prepared according to the literature<sup>[2]</sup>.

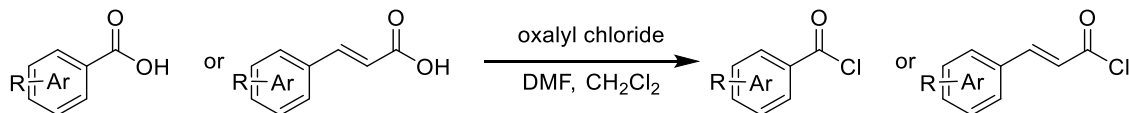

To a suspension of the carboxylic acid (5 mmol, 1.0 equiv.) in dry CH<sub>2</sub>Cl<sub>2</sub> (5 mL) at room temperature under a nitrogen atmosphere was added a catalytic amount of dry DMF (2 drops). Oxalyl chloride (7.5 mmol, 1.5 equiv., 2 M in DCM) was added dropwise over about 10 minutes with care as effervescence occurs. The reaction was allowed to stir at room temperature until completion which was judged to be when no further effervescence could be seen and in some cases, the solution became homogeneous. The solvent was then removed under reduced pressure to

afford the corresponding crude acid chloride.

### General procedure B for the synthesis of substrate I-45.<sup>[3]</sup>

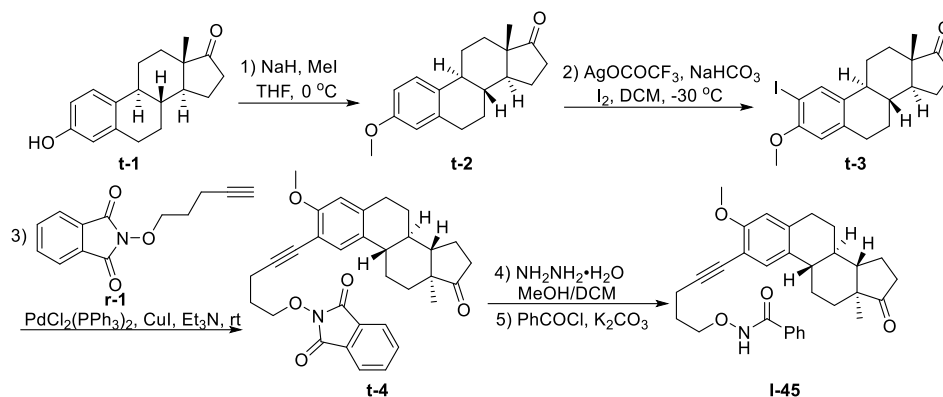

1) NaH (60% dispersion in oil) (1.2 equiv.) was added to a solution of estrone (1.0 equiv.) in dry THF (0.2 M) at 0 °C, the mixture was stirred until no gas evolution was observed and then iodomethane (3.3 equiv.) was added. After stirring for 8 h at r.t under N<sub>2</sub>, more iodomethane (6.6 equiv.) was added. The resulting mixture was stirred for next 12 h, and then reaction mixture was poured into a brine solution and extracted with ethyl acetate. The combined organic layers were dried over MgSO<sub>4</sub> and concentrated to yield compound **t-2**.

2) Compound **t-2** (1.0 equiv.), silver trifluoroacetate (1.1 equiv.) and NaHCO<sub>3</sub> (5.0 equiv.) were mixed in DCM (0.25 M) at -30 °C under N<sub>2</sub>. I<sub>2</sub> (1.05 equiv.) was added and the resulting mixture was stirred vigorously for 1 h during which the red colour completely disappeared. The reaction mixture was then filtered and washed with DCM and concentrated. The residue was purified by flash column chromatography on silica gel (gradient eluent of EtOAc/petroleum ether: 1/4 to 1/3) to give compound **t-3**.

3) To a 100 mL three-necked round-bottom flask, under N<sub>2</sub>, was added PdCl<sub>2</sub>(PPh<sub>3</sub>)<sub>2</sub> (0.01 equiv.), CuI (0.02 equiv.), terminal alkyne **r-1** (1.0 equiv.), compound **t-3** (1.2 equiv.) and anhydrous Et<sub>3</sub>N (0.5 M). The mixture was stirred at room temperature for 24 h. Upon completion (indicated by TLC), the reaction is filtered over celite, washing with dichloromethane. The solvent was removed, and the residue purified by flash column chromatography on silica gel (gradient eluent of EtOAc/petroleum ether: 1/10 to 1/5) to give compound **t-4**.

4) In a 100 mL round-bottom flask was charged compound **t-4** (1.0 equiv.), MeOH/DCM (ratio 1:2) (0.2 M), and then slowly added hydrazine monohydrate (1.05 equiv.), then stirred at room temperature for 2 h. Upon completion (indicated by TLC), the solvent was then removed under reduce pressure. The residue was washed with DCM and filtered, collect the DCM part and removed the solvent to give the crude *O*-alkoxylamine, which was used in next step without further purification.

5) The crude *O*-alkoxylamine (1.0 equiv.) which was obtained in the previous step was added to a biphasic mixture

of  $\text{K}_2\text{CO}_3$  (1.2 equiv.) in a 2:1 mixture of EtOAc:  $\text{H}_2\text{O}$  (0.2 M). The resulting solution was cooled to  $0\text{ }^\circ\text{C}$  followed by dropwise addition of benzoyl chloride. The reaction was allowed to stir at same temperature for 2 h. Upon completion (indicated by TLC), the phases were separated, and the aqueous phase was extracted twice with EtOAc. The combined organic layers were dried over  $\text{Na}_2\text{SO}_4$ , filtered, and evaporated under reduced pressure. The residue was purified by flash column chromatography on silica gel (gradient eluent of EtOAc/petroleum ether: 1/4 to 1/2) to give compound **I-45**.

### General procedure C for the synthesis of substrate **I-46** ~ **I-60**.<sup>[1], [7]</sup>

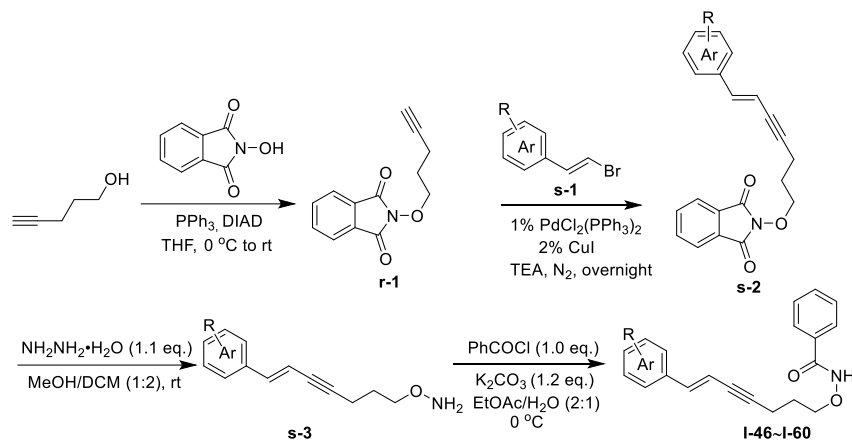

1) To a 50 mL Schlenk tube, under  $\text{N}_2$ , was added *N*-hydroxyphthalimide (1.054g, 6.5 mmol), triphenylphosphine ( $\text{PPh}_3$ , 1.967 g, 7.5 mmol), 30 mL of anhydrous THF, and then alcohol (0.47 mL, 5 mmol) was added. The tube is immersed in an ice bath, and diisopropyl azodicarboxylate (DIAD, 1.48 mL, 7.5 mmol) in 5 mL of anhydrous THF was added dropwise, upon completion of the addition, the flask is removed from the ice bath and the solution is allowed to stir at room temperature overnight. The solvent was removed and the residue purified by flash column chromatography on silica gel (using 30% EtOAc/petroleum ether as eluent) to give compound **r-1**.

2) To a 50 mL Schlenk tube, under  $\text{N}_2$ , was added  $\text{PdCl}_2(\text{PPh}_3)_2$  (0.05 mmol, 0.01 equiv.),  $\text{CuI}$  (0.1 mmol, 0.02 equiv.), **s-1** (6 mmol, 1.2 equiv.) and anhydrous TEA (10 mL), then the tube was placed in a pre-heated oil bath ( $60\text{ }^\circ\text{C}$ ). The reaction was stirred overnight and then cooled to room temperature and checked by TLC. The reaction is filtered over celite, washing with dichloromethane. The solvent was removed and the residue was purified by flash column chromatography on silica gel (using 30% EtOAc/petroleum ether as eluent) to give compound **s-2**.

3) In a 50 mL round-bottom flask was charged compound **s-2** (5.0 mmol), solvent 20 mL [MeOH/DCM (ratio 1:2)], and then slowly added hydrazine monohydrate (5.5 mmol, 1.1 equiv.), then stirred at room temperature for 1 h. Upon completion (indicated by TLC), the solvent was then removed under reduce pressure. The residue was washed with DCM and filtered, collect the DCM part and removed the solvent to give the crude *O*-alkoxylamine **s-3**, which was used in next step without further purification.

4) The crude *O*-alkoxylamine which was obtained in the previous step was added to a biphasic mixture of  $K_2CO_3$  (10 mmol, 2.0 equiv.) in a 2:1 mixture of EtOAc:  $H_2O$  (0.2 M). The resulting solution was cooled to 0 °C followed by dropwise addition of the acid chloride dissolved in a minimum amount of EtOAc. The flask containing the acid chloride was then rinsed with additional EtOAc. The reaction was allowed to stir at same temperature for 1 h. Upon completion (indicated by TLC), the phases were separated and the aqueous phase was extracted twice with EtOAc. The combined organic layers were dried over  $Na_2SO_4$ , filtered and evaporated under reduced pressure. The residue was purified by flash column chromatography on silica gel (using 30% EtOAc/petroleum ether as eluent) to give product **I-46~I-60**.

**General procedure D for the synthesis of  $\beta$ -bromostyrene compounds.**<sup>[4]</sup>

**I-46, I-47, I-48, I-51** was prepared according to general procedure C, **s-1** was prepared according to procedure D.

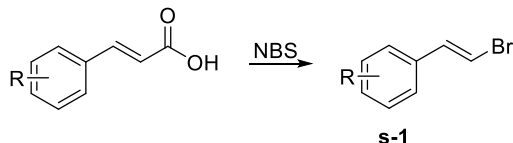

To a solution of cinnamic acid (5.0 mmol, 1.0 equiv.) in methylene chloride (5 mL) was added  $Et_3N$  (0.25 mmol, 0.05 equiv.) at room temperature and stirred for 5 minutes. *N*-bromosuccinimide (6 mmol, 1.2 equiv.) was added in one portion and stirred for 30 minutes. The solvent was removed under reduced pressure. The crude was purified by flash column chromatography (silica gel hexanes) to afford product **s-1**.

**General procedure E for the synthesis of  $\beta$ -bromostyrene compounds.**<sup>[5]</sup>

**I-49, I-50** was prepared according to general procedure C, **s-1** was prepared according to procedure E.

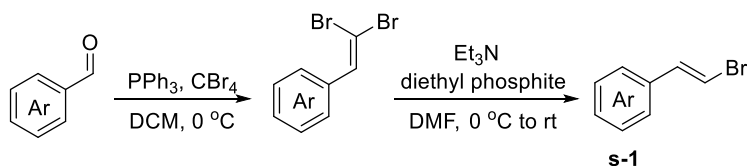

1) A flame-dried round-bottom flask equipped with a stir bar under argon was charged with the corresponding aldehyde (10 mmol, 1.0 equiv.),  $CBr_4$  (15 mmol, 1.5 equiv.) and DCM (80 mL). The reaction mixture was cooled at 0 °C, then a solution of  $PPh_3$  (30 mmol, 3.0 equiv.) in DCM (80 mL) was added dropwise over 20 min. After another 1 h at 0 °C, the mixture was concentrated under reduce pressure to half of the volume. Next, pentane was added and triphenylphosphine oxide precipitated out. The mixture was filtered and concentrated under reduced pressure. Pentane was added again to further precipitate the triphenylphosphine oxide. After filtration and evaporation of the solvent, the crude dibromide was used directly in the next step without any further purification.

2) To a mixture of the above dibromide and diethyl phosphite (30 mmol, 3.0 equiv.) in DMF (10 mL) was added  $Et_3N$  (30 mmol, 3.0 equiv.) at 0 °C. The reaction was then warmed to room temperature and stirred overnight. The

mixture was quenched with water. The aqueous layer was extracted with DCM. The combined organics were washed with brine, dried over Na<sub>2</sub>SO<sub>4</sub>, and concentrated in vacuo. The product **s-1** was purified by chromatography.

#### General procedure F for the reaction of bromofluorination of terminal alkynes.<sup>[6]</sup>

**I-54, I-55** was prepared according to general procedure C, **s-1** was replaced by **s-4**.

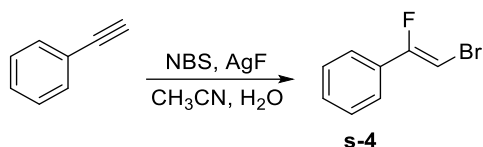

A mixture of NBS (5.5 mmol, 1.1 equiv.), AgF (12.5 mmol, 2.5 equiv.), CH<sub>3</sub>CN (wet, 10 mL), phenylacetylene (5.0 mmol, 1.0 equiv.) was added successively in Schlenk tube. After stirring for 10 h at 80 °C, the solution was filtered through a small amount of silica gel. The residue was purified by silica gel preparative TLC (n-hexane), which furnished product **s-4**.

#### General procedure H for the synthesis of **I-61**.<sup>[1], [7]</sup>

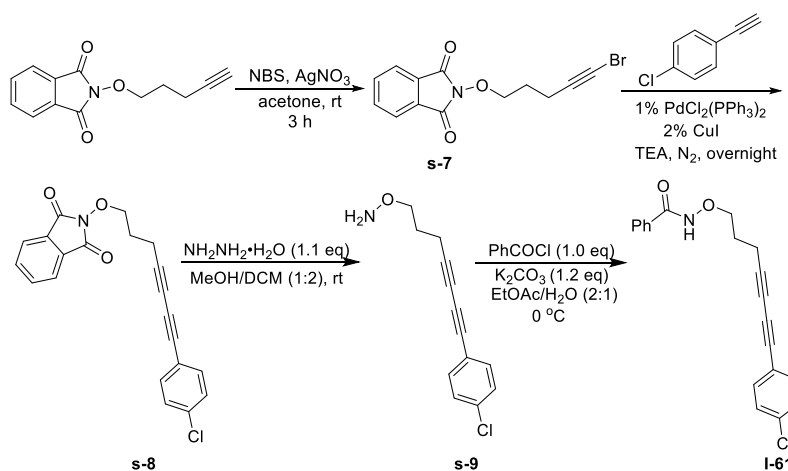

1) To a solution of terminal alkyne (10 mmol) in acetone (60 mL) was added NBS (12 mmol) and AgNO<sub>3</sub> (5 mmol %) at room temperature with magnetic stirring. After 2-4 hours, the solution was filtered through a small amount of silica gel, then the solvent was removed under reduced pressure. The crude was purified by flash column chromatography on silica gel (using 30% EtOAc/ petroleum ether as eluent) to afford product **s-7**.

2) To a 50 mL Schlenk tube, under N<sub>2</sub>, was added PdCl<sub>2</sub>(PPh<sub>3</sub>)<sub>2</sub> (0.05 mmol, 0.01 equiv.), CuI (0.1 mmol, 0.02 equiv.), compound **s-7** (5 mmol, 1.2 equiv.) and 4-chlorophenylacetylene (6 mmol, 1.2 equiv.) and anhydrous TEA (10 mL), then the tube was placed in a pre-heated oil bath (60 °C). The reaction was stirred overnight and then cooled to room temperature and checked by TLC. The reaction is filtered over celite, washing with dichloromethane. The solvent was removed and the residue was purified by flash column chromatography on silica gel (using 30% EtOAc/ petroleum ether as eluent) to give compound **s-8**.

3) In a 50 mL round-bottom flask was charged compound **s-8** (5.0 mmol), solvent 20 mL [MeOH/DCM (ratio 1:2)], and then slowly added hydrazine monohydrate (5.5 mmol, 1.1 equiv.), then stirred at room temperature for 1 h. Upon completion (indicated by TLC), the solvent was then removed under reduce pressure. The residue was washed with DCM and filtered, collect the DCM part and removed the solvent to give the crude *O*-alkoxyamine **s-9**, which was used in next step without further purification.

4) The crude *O*-alkoxyamine **s-9** which was obtained in the previous step was added to a biphasic mixture of  $K_2CO_3$  (10 mmol, 2.0 equiv.) in a 2:1 mixture of EtOAc :  $H_2O$  (0.2 M). The resulting solution was cooled to 0 °C followed by dropwise addition of the acid chloride dissolved in a minimum amount of EtOAc. The flask containing the acid chloride was then rinsed with additional EtOAc. The reaction was allowed to stir at same temperature for 1 h. Upon completion (indicated by TLC), the phases were separated and the aqueous phase was extracted twice with EtOAc. The combined organic layers were dried over  $Na_2SO_4$ , filtered, and evaporated under reduced pressure. The residue was purified by flash column chromatography on silica gel (using 30% EtOAc/ petroleum ether as eluent) to give product **I-61**.

#### General procedure G for the synthesis of **I-63**.<sup>[1], [7]</sup>

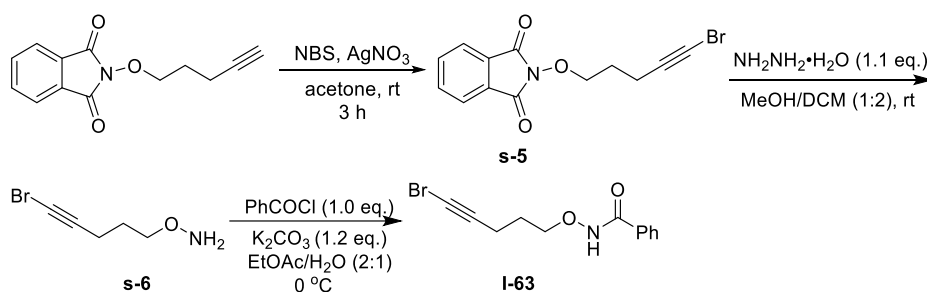

1) To a solution of terminal alkyne (10 mmol) in acetone (60 mL) was added NBS (12 mmol) and  $AgNO_3$  (5 mmol %) at room temperature with magnetic stirring. After 2-4 hours, the solution was filtered through a small amount of silica gel, then the solvent was removed under reduced pressure. The crude was purified by flash column chromatography on silica gel (using 30% EtOAc/ petroleum ether as eluent) to afford product **s-5**.

2) In a 50 mL round-bottom flask was charged alkoxyphthalimide starting material (5.0 mmol), solvent 20 mL [MeOH/DCM (ratio 1:2)], and then slowly added hydrazine monohydrate (5.5 mmol, 1.1 equiv.), then stirred at room temperature for 1 h. Upon completion (indicated by TLC), the solvent was then removed under reduce pressure. The residue was washed with DCM and filtered, collect the DCM part and removed the solvent to give the crude *O*-alkoxyamine **s-6**, which was used in next step without further purification.

4) The crude *O*-alkoxyamine which was obtained in the previous step was added to a biphasic mixture of  $K_2CO_3$  (10 mmol, 2.0 equiv.) in a 2:1 mixture of EtOAc:  $H_2O$  (0.2 M). The resulting solution was cooled to 0 °C followed by dropwise addition of the acid chloride dissolved in a minimum amount of EtOAc. The flask containing the acid



chloride was then rinsed with additional EtOAc. The reaction was allowed to stir at same temperature for 1 h. Upon completion (indicated by TLC), the phases were separated and the aqueous phase was extracted twice with EtOAc. The combined organic layers were dried over Na<sub>2</sub>SO<sub>4</sub>, filtered, and evaporated under reduced pressure. The residue was purified by flash column chromatography on silica gel (using 30% EtOAc/ petroleum ether as eluent) to give product **I-63**.

#### 4. General experimental procedure

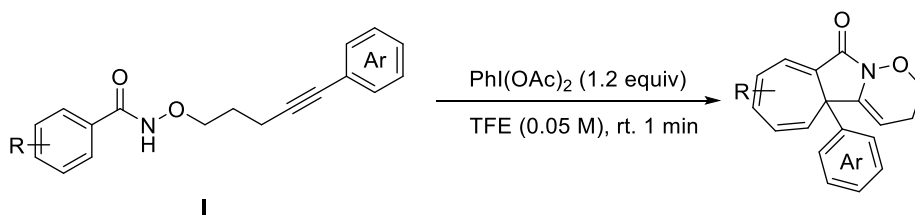

Substrates **I** (0.20 mmol, 1.0 equiv.), PIDA (0.24 mmol, 1.2 equiv.) and TFE (4 mL) were added to a 25 mL round bottom flask which was equipped with a stirring bar. The mixture was stirred at room temperature open to air for 1 min. The solvent was then removed under vacuo. After removing the solvent under vacuo, the residue was purified with chromatography column on silica gel (gradient eluent of EtOAc/petroleum ether: 1/4 to 1/2) to give the corresponding product.

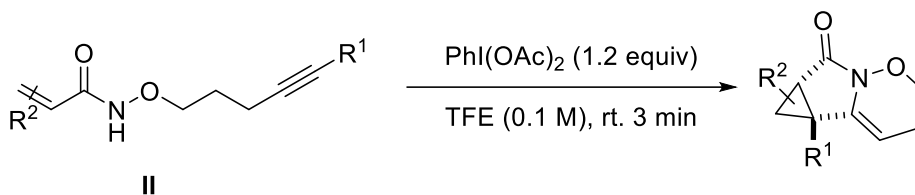

Substrates **II** (0.20 mmol, 1.0 equiv.), PIDA (0.24 mmol, 1.2 equiv.) and TFE (2 mL) were added to a 10 mL round bottom flask which was equipped with a stirring bar. The mixture was stirred at room temperature open to air for 3 mins. The solvent was then removed under vacuo. After removing the solvent under vacuo, the residue was purified with chromatography column on silica gel (gradient eluent of EtOAc/petroleum ether: 1/4 to 1/3) to give the corresponding product.

#### 5. Optimization of reaction conditions

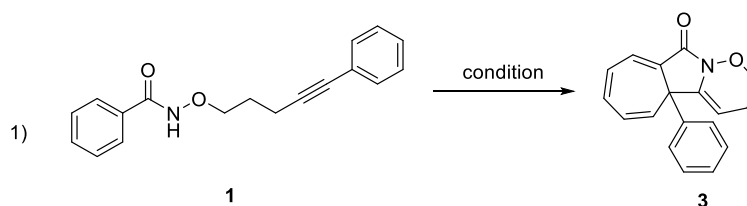

#### Oxidant<sup>a</sup>

| Entry | Oxidant | Time | Yield <sup>b</sup> |
|-------|---------|------|--------------------|
| 1     | TBHP    | 12 h | 0%                 |
| 2     | DTBP    | 12 h | 0%                 |

|                 |                                              |        |     |
|-----------------|----------------------------------------------|--------|-----|
| 3               | H <sub>2</sub> O <sub>2</sub>                | 12 h   | 0%  |
| 4               | CAN                                          | 12 h   | 0%  |
| 5               | Oxone                                        | 12 h   | 0%  |
| 6               | K <sub>2</sub> S <sub>2</sub> O <sub>8</sub> | 12 h   | 0%  |
| 7               | BPO                                          | 12 h   | 0%  |
| 8               | DDQ                                          | 12 h   | 0%  |
| 9               | NBS                                          | 12 h   | 0%  |
| 10              | NIS                                          | 12 h   | 0%  |
| 11              | AgOAc                                        | 12 h   | 0%  |
| 12              | Cu(OAc) <sub>2</sub>                         | 12 h   | 0%  |
| 13              | IBX                                          | 12 h   | 0%  |
| 14              | PIDA                                         | 30 min | 41% |
| 15              | PIDA                                         | 1 min  | 69% |
| 16 <sup>e</sup> | PhI, <i>m</i> -CPBA                          | 12 h   | 0%  |
| 17 <sup>d</sup> | PhI, H <sub>2</sub> O <sub>2</sub>           | 12 h   | 0%  |
| 18 <sup>e</sup> | PhI, CH <sub>3</sub> CO <sub>3</sub> H       | 12 h   | 0%  |

[a] Reaction conditions: **1** (0.2 mmol, 1.0 equiv.), oxidant **2** (0.2 mmol, 1.0 equiv.), HFIP (4.0 mL, 0.05 M), open in air, rt. TBHP = *tert*-butyl hydroperoxide, DTBP = di-*tert*-butyl peroxide, CAN = ceric ammonium nitrate, Oxone = potassium peroxymonosulfate, BPO = benzoyl peroxide, DDQ = 2,3-dichloro-5,6-dicyano-1,4-benzoquinone, NBS = *N*-bromosuccinimide, NIS = *N*-iodosuccinimide, *m*-CPBA = 3-chloroperoxybenzoic acid, IBX = 2-iodoxybenzoic acid. [b] Yield refers to isolated products after column chromatography. [c] PhI (0.04 mmol, 0.2 equiv), *m*-CPBA (0.3 mmol, 1.5 equiv). [d] PhI (0.04 mmol, 0.2 equiv.), H<sub>2</sub>O<sub>2</sub> (0.3 mmol, 1.5 equiv.). [e] PhI (0.04 mmol, 0.2 equiv.), CH<sub>3</sub>CO<sub>3</sub>H (0.3 mmol, 1.5 equiv.).

#### **I<sup>III</sup> reagent<sup>a</sup>**

| Entry | <b>I<sup>III</sup> reagent</b> | Yield <sup>b</sup> |
|-------|--------------------------------|--------------------|
| 1     | PIDA                           | 69%                |
| 2     | PIFA                           | 40%                |
| 3     | <b>P-1</b>                     | 56%                |
| 4     | <b>P-2</b>                     | 20%                |
| 5     | <b>P-3</b>                     | 25%                |
| 6     | <b>P-4</b>                     | 66%                |
| 7     | <b>P-5</b>                     | 0%                 |
| 8     | <b>P-6</b>                     | 0%                 |
| 9     | <b>P-7</b>                     | 0%                 |

[a] Reaction conditions: **1** (0.2 mmol, 1.0 equiv.), I<sup>III</sup> reagent (0.2 mmol, 1.0 equiv.), air, HFIP (4 mL, 0.05 M), rt, 1 min. [b] Yield refers to isolated products after column chromatography.

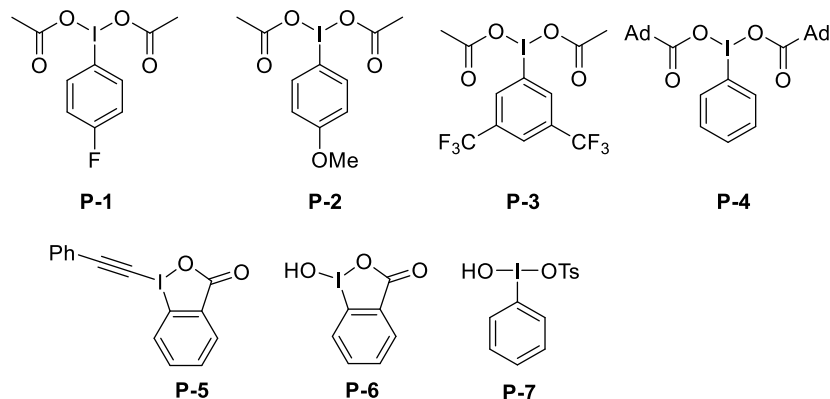

#### Additive<sup>a</sup>

| Entry | Additive                           | Yield <sup>b</sup> |
|-------|------------------------------------|--------------------|
| 1     | CH <sub>3</sub> COOH               | 67%                |
| 2     | TFA                                | 60%                |
| 3     | BF <sub>3</sub> ·Et <sub>2</sub> O | 0%                 |
| 4     | In(OTf) <sub>3</sub>               | 0%                 |
| 5     | Zn(OTf) <sub>2</sub>               | 0%                 |
| 6     | NaOAc                              | 69%                |

[a] Reaction conditions: **1** (0.2 mmol, 1.0 equiv.), PIDA (0.2 mmol, 1.0 equiv.), Additive (0.2 mmol, 1.0 equiv.), air, HFIP (4 mL, 0.05 M), rt, 1 min. [b] Yield refers to isolated products after column chromatography.

#### Solvent<sup>a</sup>

| Entry                 | Solvent                            | Yield <sup>b</sup> |
|-----------------------|------------------------------------|--------------------|
| 1                     | TFE                                | 80%                |
| 2                     | DCE                                | 10%                |
| 4                     | MeCN                               | trace              |
| 5                     | THF                                | trace              |
| 6                     | DMF                                | 0%                 |
| 7                     | dioxane                            | trace              |
| 8                     | MeOH                               | trace              |
| 9                     | CH <sub>3</sub> CH <sub>2</sub> OH | trace              |
| 10                    | <i>t</i> -AmOH                     | trace              |
| <b>11<sup>c</sup></b> | <b>TFE</b>                         | <b>87%</b>         |
| 12 <sup>d</sup>       | TFE                                | 87%                |
| 13 <sup>e</sup>       | TFE                                | 83%                |

[a] Reaction conditions: **1** (0.2 mmol, 1.0 equiv.), PIDA (0.2 mmol, 1.0 equiv.), solvent (4 mL, 0.05 M), air, rt, 1 min. [b] Yield refers to isolated products after column chromatography. [c] PIDA (0.24 mmol, 1.2 equiv.) used, 1

min. [d] PIDA (0.3 mmol, 1.5 equiv.) used, 30 s. [e] 12 h

#### Temperature<sup>a</sup>

| Entry | Temp /°C | Yield <sup>b</sup> |
|-------|----------|--------------------|
| 1     | 0        | 87%                |
| 2     | rt       | 87%                |
| 3     | 50       | 83%                |

[a] Reaction conditions: **1** (0.2 mmol, 1.0 equiv), PIDA (0.24 mmol, 1.2 equiv), T °C, air, TFE (4 mL, 0.05 M), 1 min. [b] Yield refers to isolated products after column chromatography.

#### Concentration<sup>a</sup>

| Entry    | V/mL     | Yield <sup>b</sup> |
|----------|----------|--------------------|
| 1        | 1        | 81%                |
| 2        | 2        | 84%                |
| <b>3</b> | <b>4</b> | <b>87%</b>         |
| 4        | 6        | 86%                |
| 5        | 8        | 87%                |

[a] Reaction conditions: **1** (0.2 mmol, 1.0 equiv.), PIDA (0.24 mmol, 1.2 equiv.), air, TFE (V mL), rt, 1 min. [b] Yield refers to isolated products after column chromatography.

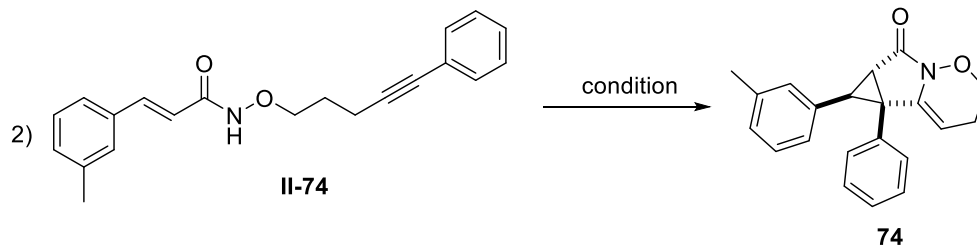

| Entry          | I <sup>III</sup> reagent | Solvent                | Yield(%) <sup>b</sup> |
|----------------|--------------------------|------------------------|-----------------------|
| 1 <sup>c</sup> | PIDA                     | HFIP                   | 58                    |
| 2 <sup>d</sup> | PIDA                     | HFIP                   | 68                    |
| 3 <sup>e</sup> | PIDA                     | HFIP                   | 32                    |
| 4              | PIDA                     | TFE                    | 71                    |
| 5              | PIDA                     | Tetrafluoro-1-propanol | 46                    |
| 6              | PIDA                     | MeOH                   | N.D                   |
| 7              | PIDA                     | EtOH                   | N.D                   |
| 8              | PIDA                     | CH <sub>3</sub> COOH   | N.D                   |
| 9              | PIDA                     | DCM                    | N.D                   |
| 10             | PIDA                     | THF                    | N.D                   |

|           |                                   |                    |           |
|-----------|-----------------------------------|--------------------|-----------|
| 11        | PIDA                              | Toluene            | N.D       |
| 12        | PIDA                              | CH <sub>3</sub> CN | N.D       |
| 13        | PIDA                              | DMF                | N.D       |
| 14        | PIDA                              | DMSO               | N.D       |
| 16        | <b>P-4</b>                        | TFE                | 53        |
| 17        | PIFA                              | TFE                | 41        |
| 18        | PhI+H <sub>2</sub> O <sub>2</sub> | TFE                | N.R       |
| <b>20</b> | <b>PIDA(1.2 equiv)</b>            | <b>TFE</b>         | <b>81</b> |
| 21        | PIDA(1.5 equiv)                   | TFE                | 69        |

<sup>a</sup> **II-74** (0.1 mmol), PIDA (0.1 mmol), solvent (2 mL). <sup>b</sup> Yield refers to isolated products after column chromatography. <sup>c</sup> PIDA is added to the mixture at once. <sup>d</sup> PIDA is added slowly in five minutes. <sup>e</sup> PIDA was dissolved in HFIP (1 ml) and added. N.R = no reaction, N.D = no detected.

### 6. Unsuccessful Substrates

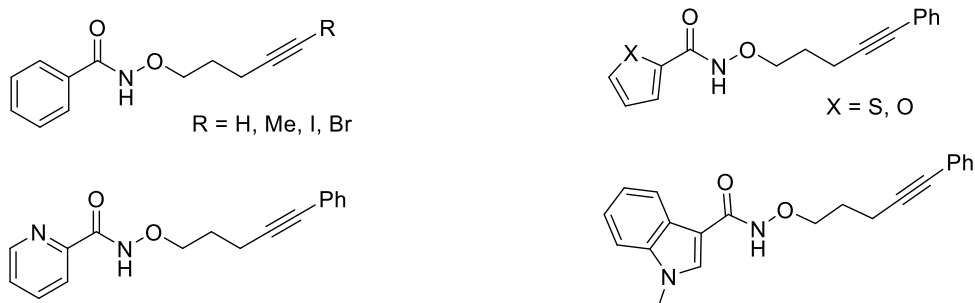

### 7. Gram-scale reaction

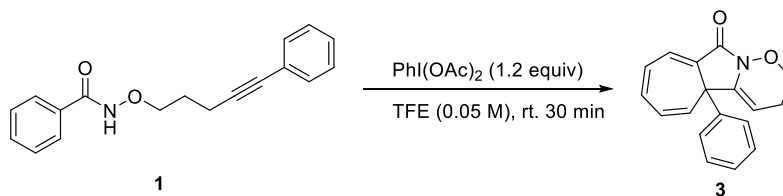

Substrates **1** (1.40 g, 5.0 mmol, 1.0 equiv.), PIDA (1.93 g, 6.0 mmol, 1.2 equiv.) and TFE (100 mL) were added to a 250 mL round bottom flask which was equipped with a stirring bar. The mixture was stirred at room temperature open to air for 30 min. The solvent was then removed under vacuo. After removing the solvent under vacuo, the residue was purified with chromatography column on silica gel (gradient eluent of EtOAc/petroleum ether: 1/4 to 1/2) to give product **3** (1.15g, 83% yield).

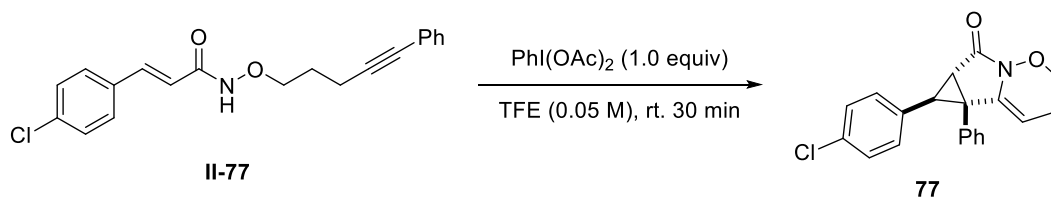

Substrates **II-77** (1.70 g, 5.0 mmol, 1.0 equiv.), PIDA (1.93 g, 4.0 mmol, 1.0 equiv.) and TFE (100 mL) were added

to a 250 mL round bottom flask which was equipped with a stirring bar. The mixture was stirred at room temperature open to air for 30 min. The solvent was then removed under vacuo. After removing the solvent under vacuo, the residue was purified with chromatography column on silica gel (gradient eluent of EtOAc/petroleum ether: 1/4 to 1/3) to give product **77** (1.35g, 80% yield).

### 8. Procedure for the follow-up transformation

**65** was synthesized according to the following procedure.<sup>[8]</sup>

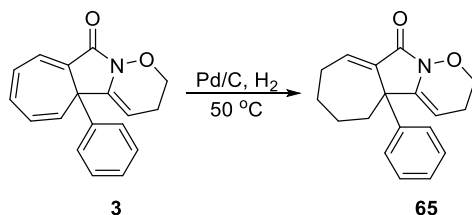

To a 25-mL flame-dried Schlenk tube containing a magnetic stirring bar, **3** (55 mg, 0.2 mmol), 10 % Pd/C (10 mg), and CH<sub>3</sub>OH (3.0 mL) were added in sequence, and the reaction was stirred at 50 °C for 2 h under H<sub>2</sub> atmosphere (with hydrogen balloon, ~1 atm). Then the solution was filtered through a short celite pad and the filtrate was concentrated under reduced pressure. The crude residue was purified with chromatography column on silica gel (petroleum ether: EtOAc = 4:1) to yield 48 mg pure product **65** in 85% yield as white solid.

**65'** was synthesized according to the following procedure.

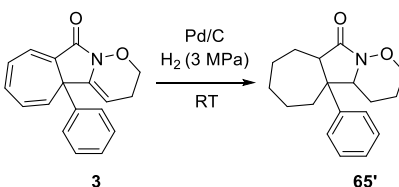

To a 10 mL autoclave containing a magnetic stirring bar, **3** (55 mg, 0.2 mmol), 10 % Pd/C (14 mg), and AcOH (2.0 mL) were added in sequence, and the reaction was stirred at RT for 40 h under H<sub>2</sub> atmosphere (3 MPa). Then the solution was filtered through a short celite pad and the filtrate was concentrated under reduced pressure. The crude residue was purified with chromatography column on silica gel (petroleum ether: EtOAc = 4:1) to yield 51 mg pure product **65'** in 90% yield as white solid.

**64** was synthesized according to the following procedure.

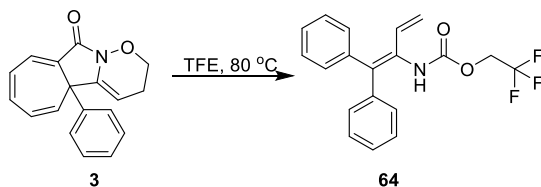

**3** (0.20 mmol, 1.0 equiv.), TFE (4 mL) were added to a 25 mL round bottom flask which was equipped with a stirring bar. The mixture was stirred at 80 °C overnight. After removing the solvent under vacuo, the residue was purified with chromatography column on silica gel (gradient eluent of EtOAc/petroleum ether: 1/10 to 1/8) to give product **64** (in 70% yield) as white solid.

**3'** was synthesized according to the following procedure.

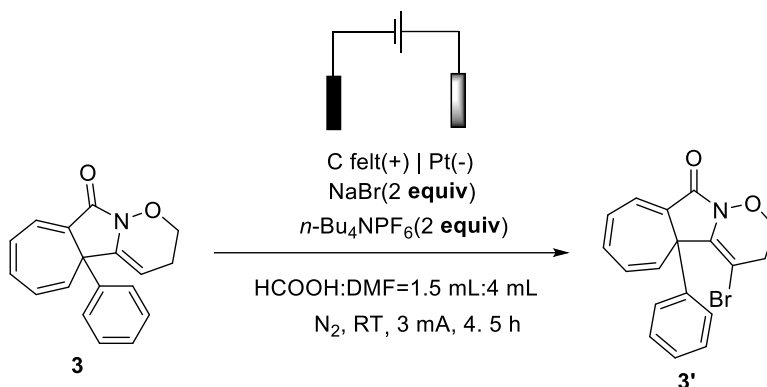

In a undivided Schlenk flask (10 mL) equipped with a stir bar, **3** (0.1 mmol, 1 equiv), sodium bromide (0.2 mmol, 2 equiv) and *n*-Bu<sub>4</sub>NPF<sub>6</sub> (0.2 mmol) were combined and added. The flask was equipped with a rubber stopper, a graphite felt anode (1 cm x 1 cm x 0.5 cm) and a Pt cathode (1 cm x 1 cm x 0.1 mm). Then HCOOH (1.5 mL), DMF (4 mL) were injected respectively into the flask via syringes. The reaction mixture was stirred and electrolyzed at a constant current of 3 mA at RT for 4.5 h in N<sub>2</sub>. When the reaction was finished, the residue was chromatographed through silica gel eluting with petroleum ether /EtOAc to give the product.

Product **3'** was obtained in 69% (24.5 mg) as a white solid after column chromatography (eluent: petroleum ether/ethyl acetate = 4/1 v/v)

**97** was synthesized according to the following procedure.

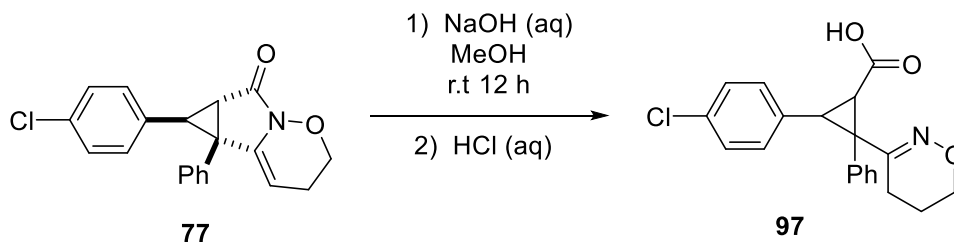

**77** (33.71 mg, 0.1 mmol) was hydrolysed by stirring with 0.25 M NaOH in MeOH (2 mL) at room temperature for 12 h, then the pH of mixture was adjusted to 3 ~ 4 by the addition of 1M HCl. Washed with portions of MeOH (3×5 mL) to give product **97** (in 96% yield) as white solid.

**98** was synthesized according to the following procedure.

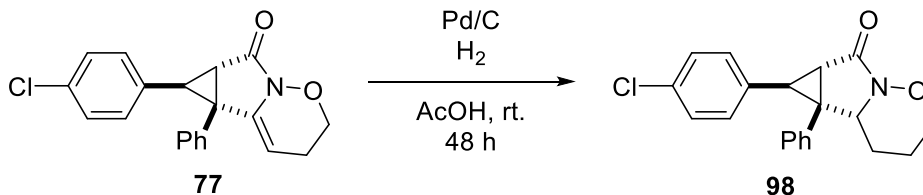

A solution of **77** (33.71 mg, 0.1 mmol) in 5.0 ml of acetic acid containing 10 % Pd/C (20 mg) was stirred under hydrogen (1 atm) at RT for 48 h. Then the solution was filtered through a short celite pad and the filtrate was

concentrated under reduced pressure. The crude residue was purified with chromatography column on silica gel (petroleum ether: EtOAc = 4:1 ~ 3:1) to yield 30.5 mg pure product **98** in 90% yield as white solid.

**99** was synthesized according to the following procedure.

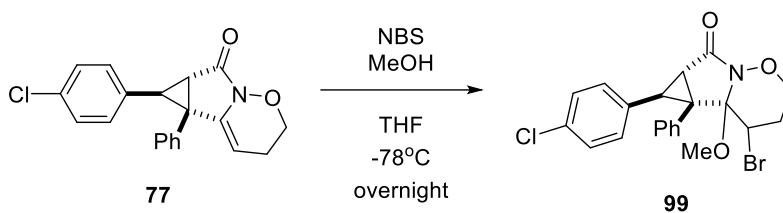

To a 25 mL Schlenk flask, under N<sub>2</sub>, was added **77** (33.71 mg, 0.1 mmol), dry THF (5 mL), and dry MeOH (5 mL). After the mixture cooled to -78 °C, add the NBS (21.36 mg, 0.12 mmol) to the flask. Then the reaction was stirred overnight at RT and checked by TLC. The reaction is filtered over celite, washing with dichloromethane. The solvent was removed and the residue was purified by flash column chromatography on silica gel (petroleum ether: EtOAc = 4:1 ~ 3:1) to yield 46.74 mg pure product **99** in 99% yield as white solid.

**100** was synthesized according to the following procedure.

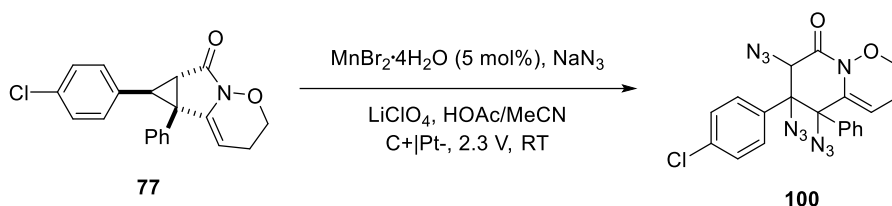

A 10 mL three-necked flask was charged with the **77** (0.2 mmol, 1.0 equiv), MnBr<sub>2</sub>·4H<sub>2</sub>O (5 mol%), NaN<sub>3</sub> (1 mmol, 5 equiv.), and LiClO<sub>4</sub> (0.35 mmol, 1.75 equiv). The flask was equipped with a rubber stopper, a carbonic felt anode (10 mm x 10 mm x 5 mm) and a platinum foil cathode (10 mm x 10 mm x 0.1 mm) and then flushed with nitrogen. HOAc (0.4 mL), and MeCN (3.5 mol) were added. The constant potential electrolysis was carried out at RT until complete consumption of the substrate (monitored by TLC). The reaction mixture was concentrated under reduced pressure. The residue was chromatographed through silica gel eluting with petroleum ether /EtOAc to give the product **100**.

## 9. Study on "[PhI] of catalytic amount"

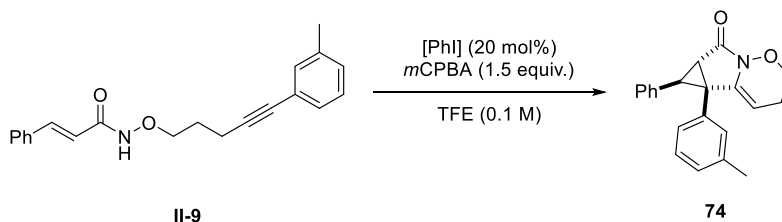

Substrates **II-9** (0.10 mmol, 1.0 equiv.), [PhI] (20 mol%), *m*CPBA (0.15 mmol, 1.5 equiv.) and TFE (1 mL) were added to a 5 mL round bottom flask which was equipped with a stirring bar. The mixture was stirred at room temperature open to air for 3 min. The solvent was then removed under vacuo. After removing the solvent under vacuo, the residue was purified with chromatography column on silica gel (gradient eluent of EtOAc/petroleum



ether: 1/4 to 1/3) to give the corresponding product **74** (Yield see Table 1).

**Table 1.** The yield of **74** with various [Ph]

| Entry | [Ph]                                                                                | Yield (%) |
|-------|-------------------------------------------------------------------------------------|-----------|
| 1     | 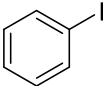   | 41        |
| 2     |    | 55        |
| 3     |    | 75        |
| 4     |    | trace     |
| 5     |    | 36        |
| 6     |   | 61        |
| 7     |  | 22        |
| 8     |  | n.d.      |
| 9     |  | n.d.      |
| 10    |  | trace     |
| 11    |  | 26        |
| 12    |  | n.d.      |

## 10. References

- [1] X. Xu, Y. Liu, C.-M. Park, *Angew. Chem., Int. Ed.* **2012**, *51*, 9372–9376.  
[2] N. Palmer, T. M. Peakman, D. Norton, D. C. Rees, *Org. Biomol. Chem.*, **2016**, *14*, 1599–1610.  
[3] F. Chen, S.-Q. Lai, F.-F. Zhu, Q. Meng, Y. Jiang, W. Yu, B. Han, *ACS Catal.* **2018**, *8*, 8925–8931.  
[4] D. R. Williams, M. W. Fultz, T. E. Christos, J. S. Carter, *Tetrahedron Letters.* **2010**, *51*, 121–124.  
[5] L. Huang, M. Rueping, *Angew. Chem. Int. Ed.* **2018**, *57*, 10333–10337.  
[6] Y. Li, X. Liu, D. Ma, B. Liu, H. Jiang, *Adv. Synth. Catal.* **2012**, *354*, 2683 – 2688.  
[7] L.-G. Xie, S. Shaaban, X. Chen, N. Maulide, *Angew. Chem.* **2016**, *128*, 13056 –13059.  
[8] Q. Zeng, K. Dong, J. Huang, L. Qiu, X. Xu, *Org. Biomol. Chem.* **2019**, *17*, 2326–2330.

## 11. Competition experiment between I-4 (I-26) and I-12 (I-33)

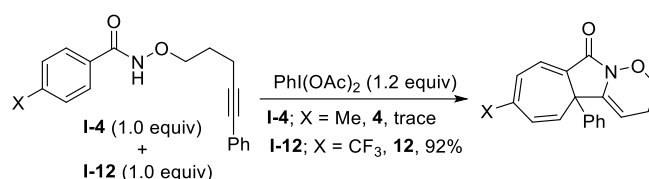

Substrates **I-4** (0.20 mmol, 1.0 equiv.), **I-12** (0.20 mmol, 1.0 equiv.) and TFE (4 mL) were added to a 25 mL round bottom flask which was equipped with a stirring bar, then PIDA (0.24 mmol, 1.2 equiv.) was added slowly, The reaction was stirred for 30 s then the solvent was evaporated under reduced pressure, and purification of the residue was done by silica gel column chromatography (petroleum ether/EtOAc = 4:1) to give the corresponding product **12** in 92% yield, and **4** was not obtained.

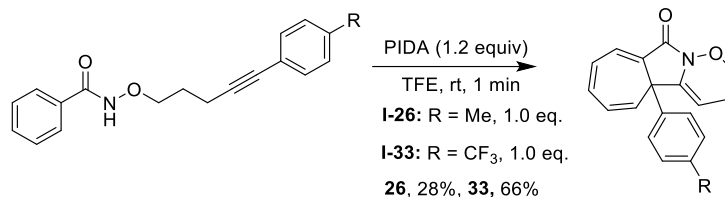

Substrates **I-26** (0.20 mmol, 1.0 equiv.), **I-33** (0.20 mmol, 1.0 equiv.) and TFE (4 mL) were added to a 25 mL round bottom flask which was equipped with a stirring bar., then PIDA (0.24 mmol, 1.2 equiv.) was added slowly, The reaction was stirred for 1 min then the solvent was evaporated under reduced pressure, and purification of the residue was done by silica gel column chromatography (petroleum ether/EtOAc = 4:1) to give product **26** (16 mg, 28% yield) and **33** (46 mg, 66% yield).

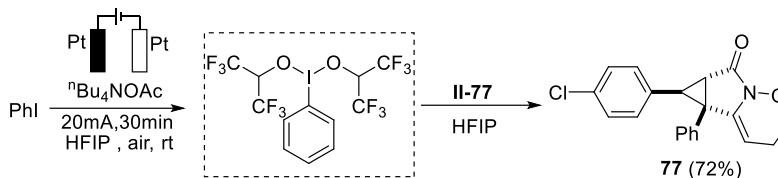

A 10 mL three-necked flask was charged with the <sup>n</sup>Bu<sub>4</sub>NOAc (0.2 mmol, 2.0 equiv), iodobenzene (0.2 mmol, 2.0 equiv), HFIP (3mL). The flask was equipped with a rubber stopper, a platinum anode (10 mm x 10 mm x 0.1 mm) and a platinum cathode (10 mm x 10 mm x 0.1 mm) and then flushed with air. The Electrolysis process was performed at room temperature with 20 mA current for 30 min. Then the in-situ hypervalent

iodine reagent was added dropwise into the solution of **II-77** (0.1 mmol, 1.0 equiv. 2.0 mL HFIP) at 0°C. The reaction process was detected through TLC analysis. The reaction mixture was concentrated under reduced pressure and the product was isolated through silica gel eluting with petroleum ether /EtOAc (4:1) (72% yield).

## 12. Characterization of compounds

### 4b-phenyl-3,4b-dihydrocyclohepta[3,4]pyrrolo[1,2-*b*][1,2]oxazin-10(2*H*)-one (**3**).

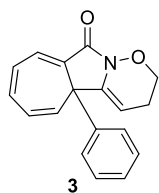

Yellow solid, 48 mg, 87% yield, M.p. = 149-151 °C. <sup>1</sup>H NMR (CDCl<sub>3</sub>, 500 MHz) δ 7.26 (s, 1H), 7.16 (s, 5H), 6.50 – 6.42 (m, 3H), 6.12 – 6.06 (m, 1H), 5.06 (t, *J* = 4.3 Hz, 1H), 4.31-4.18 (m, 2H), 2.46 – 2.26 (m, 2H); <sup>13</sup>C NMR (CDCl<sub>3</sub>, 125 MHz) δ 157.56, 142.91, 141.03, 133.64, 129.08, 128.64, 128.03, 127.73, 127.43, 127.13, 125.79, 125.35, 95.07, 69.25, 49.79, 22.59; HRMS (ESI) *m/z*: calcd for C<sub>18</sub>H<sub>16</sub>NO<sub>2</sub><sup>+</sup> [M+H]<sup>+</sup> 278.1181, found 278.1189.

### 7-methyl-4b-phenyl-3,4b-dihydrocyclohepta[3,4]pyrrolo[1,2-*b*][1,2]oxazin-10(2*H*)-one (**4**).

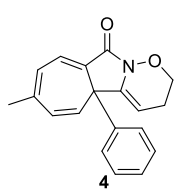

Yellow solid, 48 mg, 82% yield, M.p. = 153-155 °C. <sup>1</sup>H NMR (CDCl<sub>3</sub>, 500 MHz) δ 7.13 (d, 6H), 6.28 (d, *J* = 10.2 Hz, 1H), 6.23 (d, *J* = 6.1 Hz, 1H), 6.01 (d, *J* = 10.2 Hz, 1H), 4.99 (t, *J* = 4.2 Hz, 1H), 4.30-4.17 (m, 2H), 2.43 – 2.25 (m, 2H), 1.88 (s, 3H); <sup>13</sup>C NMR (CDCl<sub>3</sub>, 125 MHz) δ 157.96, 143.73, 143.08, 141.49, 130.80, 128.05, 127.74, 127.01, 126.29, 125.79, 125.61, 125.34, 94.76, 69.24, 49.38, 24.68, 22.59; HRMS (ESI) *m/z* calcd for C<sub>19</sub>H<sub>18</sub>NO<sub>2</sub><sup>+</sup> [M+H]<sup>+</sup> 292.1338, found 292.1344.

### 7-methoxy-4b-phenyl-3,4b-dihydrocyclohepta[3,4]pyrrolo[1,2-*b*][1,2]oxazin-10(2*H*)-one (**5**).

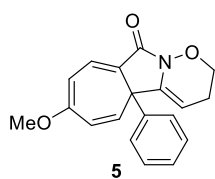

Yellow solid, 39 mg, 64% yield, M.p. = 150-152 °C. <sup>1</sup>H NMR (500 MHz, CDCl<sub>3</sub>) δ 7.22 (d, *J* = 7.5 Hz, 1H), 7.17 (s, 5H), 6.33-6.28 (m, 1H), 6.18 (d, *J* = 10.8 Hz, 1H), 5.67 – 5.60 (m, 1H), 5.00 (t, *J* = 4.2 Hz, 1H), 4.28 – 4.17 (m, 2H), 3.49 (s, 3H), 2.44-2.26 (m, 2H); <sup>13</sup>C NMR (125 MHz, CDCl<sub>3</sub>) δ 162.29, 158.35, 143.06, 141.51, 130.85, 127.87, 127.05, 125.64, 125.13, 122.33, 101.72, 94.35, 69.19, 54.88, 49.13, 22.63; HRMS (ESI) *m/z* calcd for C<sub>19</sub>H<sub>18</sub>NO<sub>3</sub><sup>+</sup> [M+H]<sup>+</sup> 308.1287, found 308.1293.

### 7-isopropyl-4b-phenyl-3,4b-dihydrocyclohepta[3,4]pyrrolo[1,2-*b*][1,2]oxazin-10(2*H*)-one (**6**).

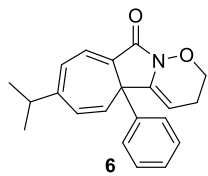

Yellow solid, 38 mg, 60% yield, M.p. = 102-104 °C. <sup>1</sup>H NMR (400 MHz, CDCl<sub>3</sub>) δ 7.19-7.11 (m, 6H), 6.37 (d, *J* = 10.2 Hz, 1H), 6.25 (d, *J* = 6.4 Hz, 1H), 6.10 (d, *J* = 10.2 Hz, 1H), 5.02 (t, *J* = 4.2 Hz, 1H), 4.32-4.16 (m, 2H), 2.46-2.23 (m, 3H), 0.91 (d, *J* = 6.9 Hz, 3H), 0.85 (d, *J* = 6.8 Hz, 3H); <sup>13</sup>C NMR (100 MHz, CDCl<sub>3</sub>) δ 157.95, 153.88, 143.08, 141.33, 129.29, 128.29, 127.59, 126.98, 126.53, 126.08, 125.51, 123.24, 94.80, 69.30, 49.41, 36.68, 22.74, 22.66, 21.74; HRMS (ESI) *m/z* calcd for C<sub>21</sub>H<sub>22</sub>NO<sub>2</sub><sup>+</sup> [M+H]<sup>+</sup> 320.1651, found 320.1656.

### 7-(tert-butyl)-4b-phenyl-3,4b-dihydrocyclohepta[3,4]pyrrolo[1,2-*b*][1,2]oxazin-10(2*H*)-one (**7**).

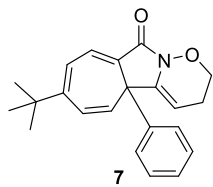

Yellow solid, 41 mg, 62% yield, M.p. = 142-144 °C.  $^1\text{H NMR}$  (400 MHz,  $\text{CDCl}_3$ )  $\delta$  7.17 (d,  $J$  = 6.6 Hz, 1H), 7.12 (s, 5H), 6.53 (d,  $J$  = 10.3 Hz, 1H), 6.35 (d,  $J$  = 6.3 Hz, 1H), 6.09 (d,  $J$  = 10.3 Hz, 1H), 5.03 (t,  $J$  = 3.9 Hz, 1H), 4.34-4.21 (m, 2H), 2.45-2.24 (m, 2H), 0.94 (s, 9H);  $^{13}\text{C NMR}$  (100 MHz,  $\text{CDCl}_3$ )  $\delta$  157.88, 156.27, 143.05, 141.03, 128.68, 127.52, 126.94, 126.18, 125.47, 121.87, 94.78, 69.30, 49.28, 36.43, 29.82, 22.66; **HRMS (ESI)**  $m/z$  calcd for  $\text{C}_{22}\text{H}_{23}\text{NO}_2\text{Na}^+$   $[\text{M}+\text{Na}]^+$  356.1626, found 356.1626.

**4b,7-diphenyl-3,4b-dihydrocyclohepta[3,4]pyrrolo[1,2-b][1,2]oxazin-10(2H)-one (8).**

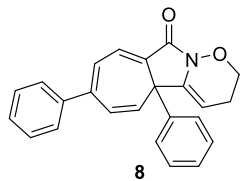

Yellow solid, 51 mg, 72% yield, M.p. = 153-155 °C.  $^1\text{H NMR}$  (500 MHz,  $\text{CDCl}_3$ )  $\delta$  7.37 – 7.27 (m, 4H), 7.25 – 7.18 (m, 4H), 7.13 (d,  $J$  = 7.6 Hz, 3H), 6.72 (d,  $J$  = 6.3 Hz, 1H), 6.65 (d,  $J$  = 10.1 Hz, 1H), 6.23 (d,  $J$  = 10.1 Hz, 1H), 5.07 (s, 1H), 4.32-4.22 (m, 2H), 2.48 – 2.26 (m, 2H);  $^{13}\text{C NMR}$  (125 MHz,  $\text{CDCl}_3$ )  $\delta$  157.57, 146.18, 142.95, 141.30, 141.16, 129.40, 129.08, 128.46, 128.01, 127.82, 127.17, 126.80, 126.14, 125.69, 125.18, 95.16, 69.31, 49.58, 22.61; **HRMS (ESI)**  $m/z$  calcd for  $\text{C}_{24}\text{H}_{20}\text{NO}_2^+$   $[\text{M}+\text{H}]^+$  354.1494, found 354.1500.

**7-fluoro-4b-phenyl-3,4b-dihydrocyclohepta[3,4]pyrrolo[1,2-b][1,2]oxazin-10(2H)-one (9).**

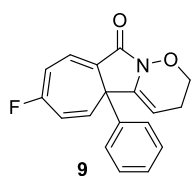

Yellow solid, 52 mg, 88% yield, M.p. = 154-156 °C.  $^1\text{H NMR}$  ( $\text{CDCl}_3$ , 500 MHz)  $\delta$  7.28-7.21 (m, 1H), 7.22 – 7.12 (m, 5H), 6.46 (t,  $J$  = 9.8 Hz, 1H), 6.31 – 6.16 (m, 2H), 5.09 (t,  $J$  = 4.2 Hz, 1H), 4.31-4.19 (m, 2H), 2.46 – 2.27 (m, 2H);  $^{13}\text{C NMR}$  ( $\text{CDCl}_3$ , 125 MHz)  $\delta$  163.30 (d,  $^1J_{\text{C,F}}$  = 252.5 Hz), 157.32, 142.47, 140.76, 131.76 (d,  $^3J_{\text{C,F}}$  = 13.7 Hz), 128.13, 127.60, 125.58, 125.16, 123.07 (d,  $^3J_{\text{C,F}}$  = 12.4 Hz), 122.22 (d,  $^2J_{\text{C,F}}$  = 35.6 Hz), 110.23 (d,  $^2J_{\text{C,F}}$  = 28.5 Hz), 95.42, 69.31, 49.59, 22.61; **HRMS (ESI)**  $m/z$  calcd for  $\text{C}_{18}\text{H}_{15}\text{FNO}_2^+$   $[\text{M}+\text{H}]^+$  296.1087, found 296.1093.

**7-chloro-4b-phenyl-3,4b-dihydrocyclohepta[3,4]pyrrolo[1,2-b][1,2]oxazin-10(2H)-one (10).**

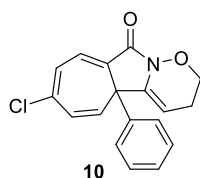

Yellow solid, 57 mg, 92% yield, M.p. = 172-174 °C.  $^1\text{H NMR}$  ( $\text{CDCl}_3$ , 500 MHz)  $\delta$  7.16 (d, 6H), 6.61 (d,  $J$  = 5.9 Hz, 1H), 6.46 (d,  $J$  = 10.0 Hz, 1H), 6.08 (d,  $J$  = 10.1 Hz, 1H), 5.04 (s, 1H), 4.25 (s, 2H), 2.47 – 2.23 (m, 2H);  $^{13}\text{C NMR}$  ( $\text{CDCl}_3$ , 125 MHz)  $\delta$  157.13, 142.40, 140.36, 138.44, 130.05, 129.44, 128.74, 128.16, 127.61, 127.43, 125.58, 123.51, 95.72, 69.37, 49.57, 22.57; **HRMS (ESI)**  $m/z$  calcd for  $\text{C}_{18}\text{H}_{15}\text{ClNO}_2^+$   $[\text{M}+\text{H}]^+$  312.0791, found 312.0796.

**7-bromo-4b-phenyl-3,4b-dihydrocyclohepta[3,4]pyrrolo[1,2-b][1,2]oxazin-10(2H)-one (11).**

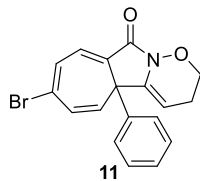

Yellow solid, 62 mg, 87% yield, M.p. = 172-173 °C.  $^1\text{H NMR}$  ( $\text{CDCl}_3$ , 500 MHz)  $\delta$  7.19 (s, 3H), 7.13 (s, 2H), 7.04 (d,  $J$  = 6.4 Hz, 1H), 6.84 (d,  $J$  = 6.3 Hz, 1H), 6.60 (d,  $J$  = 10.2 Hz, 1H), 5.97 (d,  $J$  = 10.2 Hz, 1H), 5.03 (s, 1H), 4.31-4.19 (m, 2H), 2.46 – 2.26 (m, 2H);  $^{13}\text{C NMR}$  ( $\text{CDCl}_3$ , 125 MHz)  $\delta$  157.17, 142.36, 140.15, 131.44, 131.05, 129.82, 129.44, 128.14, 127.61, 125.58, 124.03, 95.82, 69.38, 49.66, 22.56; **HRMS (ESI)**  $m/z$  calcd for  $\text{C}_{18}\text{H}_{15}\text{BrNO}_2^+$   $[\text{M}+\text{H}]^+$  356.0286, found 356.0288.

**4b-phenyl-7-(trifluoromethyl)-3,4b-dihydrocyclohepta[3,4]pyrrolo[1,2-b][1,2]oxazin-10(2H)-one (12).**

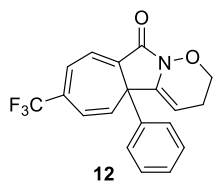

Yellow solid, 65 mg, 94% yield, M.p. = 160-162 °C. <sup>1</sup>H NMR (500 MHz, CDCl<sub>3</sub>) δ 7.25 (d, 1H), 7.22 – 7.13 (m, 3H), 7.13 – 7.04 (m, 2H), 6.92 (d, *J* = 6.1 Hz, 1H), 6.61 (d, *J* = 10.3 Hz, 1H), 6.25 (d, *J* = 10.3 Hz, 1H), 5.08 (t, *J* = 4.2 Hz, 1H), 4.34 – 4.22 (m, 2H), 2.50 – 2.29 (m, 2H); <sup>13</sup>C NMR (125 MHz, CDCl<sub>3</sub>) δ 156.37, 142.23, 139.74, 133.90 (q, <sup>2</sup>*J*<sub>C,F</sub> = 29.7 Hz), 133.27, 131.47, 128.08, 127.99 (q, <sup>3</sup>*J*<sub>C,F</sub> = 6.25 Hz), 127.64, 125.70, 123.09 (q, <sup>1</sup>*J*<sub>C,F</sub> = 274.3 Hz), 122.76, 96.27, 69.45, 49.68, 22.52; HRMS (ESI) *m/z* calcd for C<sub>19</sub>H<sub>15</sub>F<sub>3</sub>NO<sub>2</sub><sup>+</sup> [M+H]<sup>+</sup> 346.1055, found 346.1059.

**10-oxo-4b-phenyl-2,3,4b,10-tetrahydrocyclohepta[3,4]pyrrolo[1,2-b][1,2]oxazine-7-carbonitrile (13).**

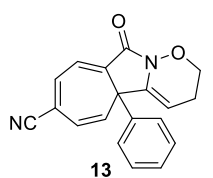

Yellow solid, 60 mg, 99% yield, M.p. = 172-174 °C. <sup>1</sup>H NMR (500 MHz, CDCl<sub>3</sub>) δ 7.27 (d, *J* = 6.6 Hz, 1H), 7.20 (s, 3H), 7.07 (s, 3H), 6.53 (d, *J* = 10.1 Hz, 1H), 6.25 (d, *J* = 10.1 Hz, 1H), 5.13 (s, 1H), 4.32-4.20 (m, 2H), 2.48 – 2.28 (m, 2H); <sup>13</sup>C NMR (125 MHz, CDCl<sub>3</sub>) δ 155.92, 141.73, 139.50, 138.86, 134.96, 131.77, 128.38, 127.99, 125.85, 125.58, 122.98, 118.44, 117.15, 96.82, 69.49, 49.82, 22.47; HRMS (ESI) *m/z* calcd for C<sub>19</sub>H<sub>14</sub>N<sub>2</sub>O<sub>2</sub>Na<sup>+</sup> [M+Na]<sup>+</sup> 325.0953, found 325.0954.

**Methyl 10-oxo-4b-phenyl-2,3,4b,10-tetrahydrocyclohepta[3,4]pyrrolo[1,2-b][1,2]oxazine-7-carboxylate (14)**

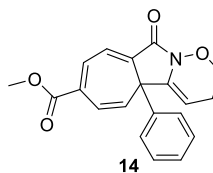

Yellow solid, 60 mg, 90% yield, M.p. = 185-187 °C. <sup>1</sup>H NMR (400 MHz, CDCl<sub>3</sub>) δ 7.50 (d, *J* = 6.7 Hz, 1H), 7.33 (d, *J* = 6.7 Hz, 1H), 7.19 – 7.07 (m, 5H), 7.04 (d, *J* = 10.4 Hz, 1H), 6.18 (d, *J* = 10.4 Hz, 1H), 5.10 (t, *J* = 4.3 Hz, 1H), 4.27 (dh, *J* = 11.0, 5.3 Hz, 2H), 3.75 (s, 3H), 2.48 – 2.29 (m, 2H); <sup>13</sup>C NMR (100 MHz, CDCl<sub>3</sub>) δ 166.50, 156.72, 142.53, 140.40, 134.25, 134.17, 133.26, 128.97, 128.09, 127.47, 126.18, 125.69, 123.69, 96.10, 69.45, 52.45, 49.84, 22.54; HRMS (ESI) *m/z* calcd for C<sub>20</sub>H<sub>17</sub>NO<sub>4</sub>Na<sup>+</sup> [M+Na]<sup>+</sup> 358.1055, found 358.1058.

**7-nitro-4b-phenyl-3,4b-dihydrocyclohepta[3,4]pyrrolo[1,2-b][1,2]oxazin-10(2H)-one (15).**

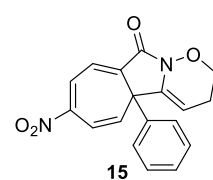

Yellow solid, 58 mg, 90% yield, M.p. = 166-168 °C. <sup>1</sup>H NMR (400 MHz, CDCl<sub>3</sub>) δ 7.84 (dd, *J* = 7.1, 1.6 Hz, 1H), 7.40 (d, *J* = 7.1 Hz, 1H), 7.32 – 7.25 (m, 1H), 7.21 – 7.14 (m, 3H), 7.12 – 7.04 (m, 3H), 6.34 (d, *J* = 10.5 Hz, 1H), 5.18 (t, *J* = 4.4 Hz, 1H), 4.71 – 3.98 (m, 2H), 2.86 – 2.22 (m, 2H). <sup>13</sup>C NMR (100 MHz, CDCl<sub>3</sub>) δ 155.71, 150.89, 141.77, 139.44, 136.17, 131.21, 128.62, 128.46, 128.08, 125.52, 121.40, 121.36, 97.12, 69.56, 50.10, 22.47; HRMS (ESI) *m/z* calcd for C<sub>18</sub>H<sub>15</sub>N<sub>2</sub>O<sub>4</sub><sup>+</sup> [M+H]<sup>+</sup> 323.1032, found 323.1036.

**7-(methylsulfonyl)-4b-phenyl-3,4b-dihydrocyclohepta[3,4]pyrrolo[1,2-b][1,2]oxazin-10(2H)-one (16).**

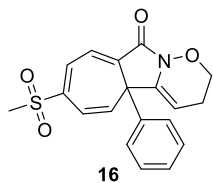

Yellow solid, 70 mg, 99% yield, M.p. = 152-154 °C. <sup>1</sup>H NMR (500 MHz, CDCl<sub>3</sub>) δ 7.46 (d, *J* = 6.3 Hz, 1H), 7.38 (d, *J* = 6.3 Hz, 1H), 7.18 – 7.14 (m, 3H), 7.13-7.07 (m, 2H), 6.91 (d, *J* = 10.1 Hz, 1H), 6.42 (d, *J* = 10.1 Hz, 1H), 5.19 (t, *J* = 4.3 Hz, 1H), 4.33-4.19 (m, 2H), 2.49 – 2.32 (m, 2H), 2.31 (s, 3H); <sup>13</sup>C NMR (125 MHz, CDCl<sub>3</sub>) δ 155.73, 143.54, 141.28, 140.02,

134.56, 133.66, 133.21, 128.14, 127.91, 125.79, 122.60, 122.35, 96.89, 69.40, 49.89, 42.69, 22.42; **HRMS (ESI)**  $m/z$  calcd for  $C_{19}H_{17}NO_4SNa^+$   $[M+Na]^+$  378.0776, found 378.0772.

**8-methyl-4b-phenyl-3,4b-dihydrocyclohepta[3,4]pyrrolo[1,2-*b*][1,2]oxazin-10(2*H*)-one (17)**

**5-methyl-4b-phenyl-3,4b-dihydrocyclohepta[3,4]pyrrolo[1,2-*b*][1,2]oxazin-10(2*H*)-one (17')**

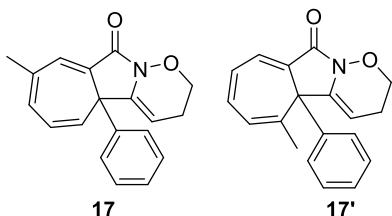

17 : 17' = 25:22

Yellow solid, 41 mg, 71% yield, M.p. = 150-152 °C. **<sup>1</sup>H NMR (500 MHz, CDCl<sub>3</sub>)**  $\delta$  7.16 (d, 5H), 7.14 (s, 1H), 6.34 (d, 1H), 6.32 – 6.17 (m, 1H), 6.02 – 5.87 (m, 1H), 5.07-4.97 (m, 1H), 4.29-4.17 (m, 2H), 2.45 – 2.24 (m, 2H), 1.99 (d, 3H); **<sup>13</sup>C NMR (100 MHz, CDCl<sub>3</sub>)**  $\delta$  157.86, 157.74, 143.30, 142.91, 141.64, 141.61, 137.94, 136.84, 135.56, 130.75, 129.41, 128.50, 127.81, 127.72, 127.65, 127.32, 127.18, 127.09, 127.06,

126.81, 126.04, 125.92, 125.73, 124.85, 95.02, 94.92, 69.32, 49.46, 48.72, 23.69, 22.95, 22.63; **HRMS (ESI)**  $m/z$  calcd for  $C_{19}H_{18}NO_2^+$   $[M+H]^+$  292.1338, found 292.1346.

**8-chloro-4b-phenyl-3,4b-dihydrocyclohepta[3,4]pyrrolo[1,2-*b*][1,2]oxazin-10(2*H*)-one (18)**

**5-chloro-4b-phenyl-3,4b-dihydrocyclohepta[3,4]pyrrolo[1,2-*b*][1,2]oxazin-10(2*H*)-one (18')**

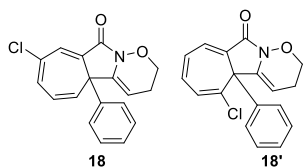

18 : 18' = 1 : 1

Yellow solid, 58 mg, 93% yield, M.p. = 150-152 °C. **<sup>1</sup>H NMR (500 MHz CDCl<sub>3</sub>)**  $\delta$  7.26 (d, 1H), 7.18 (d, 5H), 6.64 – 6.06 (m, 3H), 5.09 (d, 1H), 4.25 (s, 2H), 2.50 – 2.23 (m, 2H); **<sup>13</sup>C NMR (125 MHz, CDCl<sub>3</sub>)**  $\delta$  156.87, 156.47, 142.12, 141.94, 140.42, 140.29, 134.14, 133.58, 131.99, 131.52, 130.95, 129.61, 128.85, 128.77, 128.05, 127.56, 126.51, 126.34, 126.01, 125.67, 125.59, 124.58, 95.87, 95.73, 69.31, 49.64,

48.15, 22.49; **HRMS (ESI)**  $m/z$  calcd for  $C_{18}H_{14}ClNO_2Na^+$   $[M+Na]^+$  334.0611, found 334.0613.

**4b-phenyl-9-(trifluoromethyl)-3,4b-dihydrocyclohepta[3,4]pyrrolo[1,2-*b*][1,2]oxazin-10(2*H*)-one (19)**

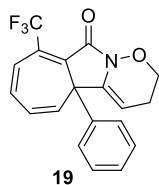

Yellow solid, 64 mg, 93% yield, M.p. = 159-161 °C. **<sup>1</sup>H NMR (400 MHz, CDCl<sub>3</sub>)**  $\delta$  7.30 – 7.22 (m, 3H), 7.14-7.12 (m, 2H), 6.46 (d,  $J$  = 7.4 Hz, 1H), 6.41 (dd,  $J$  = 8.7, 6.3 Hz, 1H), 6.00 (t,  $J$  = 8.1 Hz, 1H), 4.82 (dd,  $J$  = 5.0, 3.3 Hz, 1H), 4.40 – 4.14 (m, 2H), 3.49 (d,  $J$  = 6.1 Hz, 1H), 2.49 – 2.12 (m, 2H); **<sup>13</sup>C NMR (100 MHz, CDCl<sub>3</sub>)**  $\delta$  159.19, 138.86, 131.86, 130.73, 128.52, 128.27, 127.97, 127.11 (q,  $^3J_{C,F}$  = 6.0 Hz), 125.72, 123.43 (q,  $^1J_{C,F}$  = 272 Hz), 121.48 (q,  $^2J_{C,F}$  = 33.0 Hz), 98.22, 69.62, 58.79, 26.75, 22.63; **HRMS (ESI)**  $m/z$  calcd for  $C_{19}H_{15}F_3NO_2^+$   $[M+H]^+$  346.1055, found 346.1058.

**9-fluoro-4b-phenyl-3,4b-dihydrocyclohepta[3,4]pyrrolo[1,2-*b*][1,2]oxazin-10(2*H*)-one (20).**

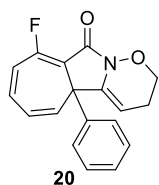

Yellow solid, 58 mg, 98% yield, M.p. = 139-141 °C. **<sup>1</sup>H NMR (500 MHz, CDCl<sub>3</sub>)**  $\delta$  7.21 (s, 5H), 6.57 – 6.40 (m, 2H), 6.31 (t,  $J$  = 10.9 Hz, 2H), 5.01 (s, 1H), 4.31 – 4.15 (m, 2H), 2.46 – 2.23 (m, 2H); **<sup>13</sup>C NMR (125 MHz, CDCl<sub>3</sub>)**  $\delta$  159.86, 156.75 (d,  $^1J_{C,F}$  = 253.9 Hz), 142.29, 141.04, 135.42,

133.04, 127.91, 127.42, 126.41, 125.74, 123.11, 109.65, 94.88, 69.18, 46.06, 22.57; **HRMS** (ESI)  $m/z$  calcd for  $C_{18}H_{14}FNO_2Na^+$   $[M+Na]^+$  318.0906, found 318.0909.

**9-methyl-4b-phenyl-3,4b-dihydrocyclohepta[3,4]pyrrolo[1,2-*b*][1,2]oxazin-10(2*H*)-one (21).**

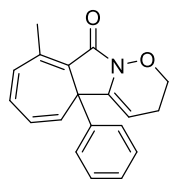

21

Yellow solid, 43 mg, 74% yield, M.p. = 143-145 °C. **<sup>1</sup>H NMR** (400 MHz,  $CDCl_3$ )  $\delta$  7.14 (s, 5H), 6.41-6.33 (m, 1H), 6.31 – 6.21 (m, 2H), 6.13 (d,  $J$  = 9.8 Hz, 1H), 4.88 (t,  $J$  = 4.3 Hz, 1H), 4.29 – 4.13 (m, 2H), 2.54 (s, 3H), 2.47 – 2.17 (m, 2H); **<sup>13</sup>C NMR** (125 MHz,  $CDCl_3$ )  $\delta$  158.60, 143.08, 141.56, 139.86, 135.41, 131.73, 131.15, 126.85, 127.49, 126.85, 126.63, 126.00, 122.20, 93.31, 69.10, 49.64, 22.69, 18.15; **HRMS** (ESI)  $m/z$  calcd for  $C_{19}H_{18}NO_2^+$   $[M+H]^+$  292.1338, found

292.1342.

**4b-phenyl-6,8-bis(trifluoromethyl)-3,4b-dihydrocyclohepta[3,4]pyrrolo[1,2-*b*][1,2]oxazin-10(2*H*)-one (22).**

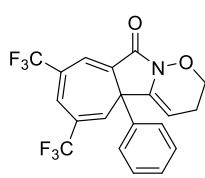

22

Yellow solid, 79 mg, 96% yield, M.p. = 162-164 °C. **<sup>1</sup>H NMR** (500 MHz,  $CDCl_3$ )  $\delta$  7.45 (s, 1H), 7.27 – 7.17 (m, 3H), 7.08-7.02 (m, 2H), 6.92 (s, 1H), 6.84 (s, 1H), 5.25 (t,  $J$  = 4.3 Hz, 1H), 4.36-4.23 (m, 2H), 2.52 – 2.33 (m, 2H); **<sup>13</sup>C NMR** (125 MHz,  $CDCl_3$ )  $\delta$  155.49, 140.75, 138.01, 133.77, 133.54 (q,  $^2J_{C,F}$  = 31.3 Hz), 131.65, 128.52 (q,  $^2J_{C,F}$  = 31.3 Hz), 128.46, 128.27, 125.91, 125.55, 122.74 (q,  $^1J_{C,F}$  = 273.8 Hz), 122.32 (q,  $^1J_{C,F}$  = 273.8 Hz), 120.69, 97.31, 69.39,

47.73, 22.39; **HRMS** (ESI)  $m/z$  calcd for  $C_{20}H_{13}F_6NO_2Na^+$   $[M+Na]^+$  436.0748, found 436.0742.

**6,8-dichloro-4b-phenyl-3,4b-dihydrocyclohepta[3,4]pyrrolo[1,2-*b*][1,2]oxazin-10(2*H*)-one (23).**

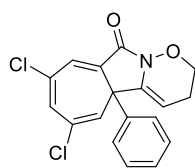

23

Yellow solid, 69 mg, 99% yield, M.p. = 183-185 °C. **<sup>1</sup>H NMR** (500 MHz,  $CDCl_3$ )  $\delta$  7.26 – 7.21 (m, 3H), 7.20 – 7.11 (m, 3H), 6.53 (s, 1H), 6.27 (s, 1H), 5.11 (t,  $J$  = 4.3 Hz, 1H), 4.30-4.19 (m, 2H), 2.46-2.28 (m, 2H); **<sup>13</sup>C NMR** (125 MHz,  $CDCl_3$ )  $\delta$  155.83, 141.22, 139.66, 135.67, 131.43, 131.36, 130.85, 128.39, 127.98, 126.15, 125.66, 125.49, 96.47, 69.36, 48.11, 22.41;

**HRMS** (ESI)  $m/z$  calcd for  $C_{18}H_{14}Cl_2NO_2^+$   $[M+H]^+$  346.0402, found 346.0402.

**5,7,9-trimethyl-4b-phenyl-3,4b-dihydrocyclohepta[3,4]pyrrolo[1,2-*b*][1,2]oxazin-10(2*H*)-one (24)**

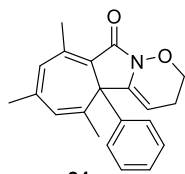

24

Yellow solid, 22 mg, 35% yield, M.p. = 122-124 °C. **<sup>1</sup>H NMR** (400 MHz,  $CDCl_3$ )  $\delta$  7.14 – 7.05 (m, 3H), 6.99-6.93 (m, 2H), 6.24 (d,  $J$  = 5.9 Hz, 2H), 4.56 (t,  $J$  = 4.3 Hz, 1H), 4.41 (q,  $J$  = 12.5 Hz, 2H), 4.31 – 4.14 (m, 2H), 2.50 (s, 3H), 2.16 (s, 3H), 1.96 (s, 3H); **<sup>13</sup>C NMR** (100 MHz,  $CDCl_3$ )  $\delta$  170.25, 158.99, 140.91, 139.33, 138.67, 138.07, 132.71, 127.28, 126.62, 126.32,

123.67, 120.07, 97.40, 69.22, 67.89, 53.27, 24.36, 22.83, 20.95, 17.86; **HRMS** (ESI)  $m/z$  calcd for  $C_{21}H_{21}NO_2Na^+$   $[M+Na]^+$  342.1470, found 342.1472.

**4b-(*p*-tolyl)-3,4b-dihydrocyclohepta[3,4]pyrrolo[1,2-*b*][1,2]oxazin-10(2*H*)-one (26).**

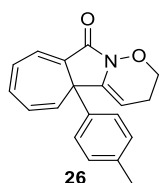

26

Yellow solid, 48 mg, 83% yield, M.p. = 143-145 °C. **<sup>1</sup>H NMR** ( $CDCl_3$ , 500 MHz)  $\delta$  7.26 – 7.24 (m, 1H), 7.05 (d,  $J$  = 8.0 Hz, 2H), 6.97 (d,  $J$  = 8.0 Hz, 2H), 6.46-6.44 (m, 3H), 6.08 (d,  $J$  = 10.0 Hz,

1H), 5.05 (t,  $J = 4.1$  Hz, 1H), 4.30 – 4.15 (m, 2H), 2.45 – 2.27 (m, 2H), 2.25 (s, 3H);  $^{13}\text{C}$  NMR (  $\text{CDCl}_3$ , 100 MHz )  $\delta$  157.67, 143.14, 138.10, 136.87, 133.72, 129.28, 128.63, 128.53, 128.17, 127.38, 125.72, 125.33, 94.98, 69.32, 49.56, 22.64, 21.03; **HRMS (ESI)**  $m/z$  calcd for  $\text{C}_{19}\text{H}_{18}\text{NO}_2^+[\text{M}+\text{H}]^+$  292.1338, found 292.1346.

**4b-(4-methoxyphenyl)-3,4b-dihydrocyclohepta[3,4]pyrrolo[1,2-*b*][1,2]oxazin-10(2*H*)-one (27).**

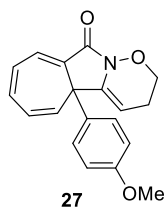

Yellow solid, 25 mg, 40% yield, M.p. = 151-153 °C.  $^1\text{H}$  NMR (500 MHz,  $\text{CDCl}_3$ )  $\delta$  7.26-7.24 (m, 1H), 7.08 – 7.06 (m, 2H), 6.70 – 6.68 (m, 2H), 6.47-6.43 (m, 3H), 6.08 (d,  $J = 10.3$  Hz, 1H), 5.05 (t,  $J = 3.4$  Hz, 1H), 4.27-4.22 (m, 2H), 3.72 (s, 3H), 2.47 – 2.26 (m, 2H);  $^{13}\text{C}$  NMR (125 MHz,  $\text{CDCl}_3$ )  $\delta$  158.52, 157.58, 143.22, 133.61, 132.97, 129.26, 128.59, 128.21, 127.28, 126.84, 125.26, 113.07, 94.72, 69.26, 55.06, 49.18, 22.58; **HRMS (ESI)**  $m/z$  calcd for  $\text{C}_{19}\text{H}_{18}\text{NO}_3^+[\text{M}+\text{H}]^+$  308.1287, found 308.1286.

**4b-([1,1'-biphenyl]-4-yl)-3,4b-dihydrocyclohepta[3,4]pyrrolo[1,2-*b*][1,2]oxazin-10(2*H*)-one (28).**

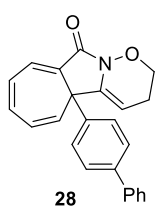

Yellow solid, 40 mg, 56% yield, M.p. = 110-112 °C.  $^1\text{H}$  NMR (500 MHz,  $\text{CDCl}_3$ )  $\delta$  7.51 (d,  $J = 8.1$  Hz, 2H), 7.42 – 7.36 (m, 4H), 7.34 – 7.27 (m, 2H), 7.22 (d,  $J = 8.2$  Hz, 2H), 6.56 – 6.43 (m, 3H), 6.17 – 6.09 (m, 1H), 5.11 (t,  $J = 4.2$  Hz, 1H), 4.31-4.22 (m, 2H), 2.47 – 2.28 (m, 2H);  $^{13}\text{C}$  NMR (125 MHz,  $\text{CDCl}_3$ )  $\delta$  157.58, 142.85, 140.33, 140.03, 139.93, 133.73, 128.98, 128.71, 128.64, 127.97, 127.51, 127.23, 126.87, 126.41, 126.20, 125.46, 95.17, 69.27, 49.58, 22.62; **HRMS (ESI)**  $m/z$  calcd for  $\text{C}_{24}\text{H}_{20}\text{NO}_2^+[\text{M}+\text{H}]^+$  354.1494, found 354.1496.

**4b-(4-(tert-butyl)phenyl)-3,4b-dihydrocyclohepta[3,4]pyrrolo[1,2-*b*][1,2]oxazin-10(2*H*)-one (29).**

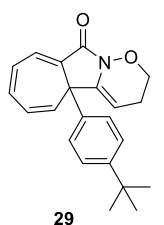

Yellow solid, 53 mg, 80% yield, M.p. = 142-144 °C.  $^1\text{H}$  NMR (500 MHz,  $\text{CDCl}_3$ )  $\delta$  7.26 – 7.21 (m, 1H), 7.14 (d,  $J = 8.4$  Hz, 2H), 7.04 (d,  $J = 8.4$  Hz, 2H), 6.46-6.42 (m, 3H), 6.10-6.04 (m, 1H), 5.06 (t,  $J = 4.2$  Hz, 1H), 4.24 (t,  $J = 5.1$  Hz, 2H), 2.43-2.29 (m, 2H), 1.23 (s, 9H);  $^{13}\text{C}$  NMR (125 MHz,  $\text{CDCl}_3$ )  $\delta$  157.68, 149.78, 143.08, 137.82, 133.61, 129.24, 128.58, 128.03, 127.21, 125.33, 124.58, 94.87, 69.24, 49.48, 34.28, 31.21, 22.58; **HRMS (ESI)**  $m/z$  calcd for  $\text{C}_{22}\text{H}_{24}\text{NO}_2^+[\text{M}+\text{H}]^+$  334.1807, found 334.1818.

**4b-(4-fluorophenyl)-3,4b-dihydrocyclohepta[3,4]pyrrolo[1,2-*b*][1,2]oxazin-10(2*H*)-one (30).**

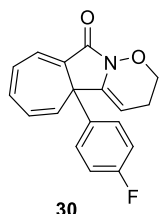

Yellow solid, 47 mg, 80% yield, M.p. = 142-144 °C.  $^1\text{H}$  NMR (  $\text{CDCl}_3$ , 500 MHz )  $\delta$  7.26 (s, 1H), 7.20 – 7.03 (m, 2H), 6.85 (t,  $J = 8.3$  Hz, 2H), 6.48 (s, 3H), 6.08 (d,  $J = 8.7$  Hz, 1H), 5.04 (t,  $J = 4.4$  Hz, 1H), 4.27-4.23 (m, 2H), 2.49 – 2.24 (m, 2H);  $^{13}\text{C}$  NMR (  $\text{CDCl}_3$ , 125 MHz )  $\delta$  161.77 (d,  $^1J_{\text{C,F}} = 246.1$  Hz), 157.45, 142.82, 136.69, 136.66, 133.76, 128.96, 128.76, 128.03, 127.61, 127.40 (d,  $^3J_{\text{C,F}} = 8.1$  Hz), 125.47, 114.67 (d,  $^2J_{\text{C,F}} = 21.5$  Hz), 95.23, 69.31, 49.24, 22.61; **HRMS (ESI)**  $m/z$  calcd for  $\text{C}_{18}\text{H}_{15}\text{FNO}_2^+[\text{M}+\text{H}]^+$  296.1087, found 296.1093.

**4b-(4-chlorophenyl)-3,4b-dihydrocyclohepta[3,4]pyrrolo[1,2-*b*][1,2]oxazin-10(2*H*)-one (31).**

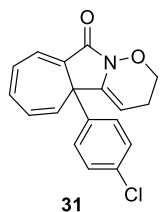

Yellow solid, 39 mg, 62% yield, M.p. = 156-158 °C.  $^1\text{H}$  NMR (500 MHz,  $\text{CDCl}_3$ )  $\delta$  7.27 (s, 1H),



7.14 (d,  $J = 8.6$  Hz, 2H), 7.09 (d,  $J = 8.7$  Hz, 2H), 6.54 – 6.43 (m, 3H), 6.11 – 6.02 (m, 1H), 5.04 (t,  $J = 4.3$  Hz, 1H), 4.30-4.20 (m, 2H), 2.47 – 2.28 (m, 2H);  $^{13}\text{C}$  NMR (125 MHz,  $\text{CDCl}_3$ )  $\delta$  157.39, 142.58, 139.56, 133.79, 132.96, 128.82, 128.67, 128.00, 127.83, 127.73, 127.22, 125.53, 95.36, 69.30, 49.34, 22.63; HRMS(ESI)  $m/z$  calcd for  $\text{C}_{18}\text{H}_{15}\text{ClNO}_2^+ [\text{M}+\text{H}]^+$  312.0791, found 312.0797.

**4b-(4-bromophenyl)-3,4b-dihydrocyclohepta[3,4]pyrrolo[1,2-*b*][1,2]oxazin-10(2*H*)-one (32).**

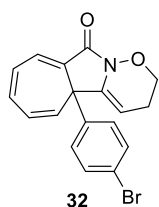

Yellow solid, 50 mg, 70% yield, M.p. = 150-152 °C.  $^1\text{H}$  NMR (  $\text{CDCl}_3$ , 500 MHz )  $\delta$  7.31 – 7.23 (m, 3H), 7.03 (d,  $J = 8.5$  Hz, 2H), 6.50 – 6.42 (m, 3H), 6.08-6.04 (m, 1H), 5.04 (t,  $J = 4.3$  Hz, 1H), 4.24 (m, 2H), 2.47 – 2.26 (m, 2H);  $^{13}\text{C}$  NMR (  $\text{CDCl}_3$ , 125 MHz )  $\delta$  157.33, 142.39, 140.07, 133.76, 130.88, 128.77, 128.54, 127.69, 127.53, 125.50, 121.02, 95.38, 69.25, 49.34, 22.57; HRMS (ESI)  $m/z$  calcd for  $\text{C}_{18}\text{H}_{15}\text{BrNO}_2^+ [\text{M}+\text{H}]^+$  356.0286, found 356.0292.

**4b-(4-(trifluoromethyl)phenyl)-3,4b-dihydrocyclohepta[3,4]pyrrolo[1,2-*b*][1,2]oxazin-10(2*H*)-one (33).**

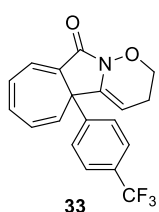

Yellow solid, 63 mg, 91% yield, M.p. = 132-134 °C.  $^1\text{H}$  NMR (  $\text{CDCl}_3$ , 500 MHz )  $\delta$  7.41 (d,  $J = 8.1$  Hz, 2H), 7.27 (d,  $J = 7.9$  Hz, 3H), 6.55 – 6.42 (m, 3H), 6.09 (d,  $J = 9.7$  Hz, 1H), 5.05 (t,  $J = 4.2$  Hz, 1H), 4.30-4.18 (m, 2H), 2.47 – 2.25 (m, 2H);  $^{13}\text{C}$  NMR (  $\text{CDCl}_3$ , 125 MHz )  $\delta$  157.26, 144.99, 142.10, 133.82, 129.36 (q,  $^2J_{\text{C,F}} = 32.5$  Hz), 128.84, 128.32, 127.90, 127.54, 126.13, 125.64, 124.78, 123.89 (q,  $^1J_{\text{C,F}} = 272.7$  Hz), 95.75, 69.25, 49.60, 22.57; HRMS (ESI)  $m/z$  calcd for  $\text{C}_{19}\text{H}_{15}\text{F}_3\text{NO}_2^+ [\text{M}+\text{H}]^+$  346.1055, found 346.1056.

**4-(10-oxo-2,3-dihydrocyclohepta[3,4]pyrrolo[1,2-*b*][1,2]oxazin-4b(10*H*)-yl)benzotrile (34).**

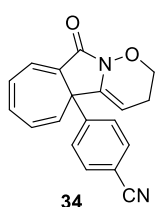

Yellow solid, 53 mg, 88% yield, M.p. = 176-178 °C.  $^1\text{H}$  NMR (500 MHz,  $\text{CDCl}_3$ )  $\delta$  7.48 – 7.41 (m, 2H), 7.30 – 7.23 (m, 3H), 6.54 – 6.42 (m, 3H), 6.07 (d,  $J = 9.5$  Hz, 1H), 5.04 (t,  $J = 4.2$  Hz, 1H), 4.30-4.18 (m, 2H), 2.48 – 2.25 (m, 2H);  $^{13}\text{C}$  NMR (125 MHz,  $\text{CDCl}_3$ )  $\delta$  157.10, 146.32, 141.70, 133.88, 131.71, 128.92, 128.13, 127.97, 127.33, 126.59, 125.76, 118.45, 111.15, 96.05, 69.25, 49.72, 22.57; HRMS (ESI)  $m/z$  calcd for  $\text{C}_{19}\text{H}_{15}\text{N}_2\text{O}_2^+ [\text{M}+\text{H}]^+$  303.1134, found 303.1139.

**4b-(*o*-tolyl)-3,4b-dihydrocyclohepta[3,4]pyrrolo[1,2-*b*][1,2]oxazin-10(2*H*)-one (35).**

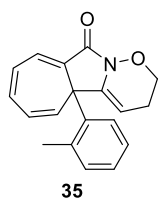

Yellow solid, 42 mg, 72% yield, M.p. = 148-150 °C.  $^1\text{H}$  NMR (  $\text{CDCl}_3$ , 500 MHz )  $\delta$  7.19 (d,  $J = 7.6$  Hz, 1H), 7.07 (t,  $J = 7.0$  Hz, 1H), 7.03-6.96 (m, 3H), 6.47-6.40 (m, 3H), 5.49 (d,  $J = 8.8$  Hz, 1H), 4.90 (t,  $J = 4.4$  Hz, 1H), 4.32-4.23 (m, 2H), 2.44 – 2.30 (m, 2H), 2.27 (s, 3H);  $^{13}\text{C}$  NMR (  $\text{CDCl}_3$ , 125 MHz )  $\delta$  158.49, 141.55, 136.88, 135.07, 132.15, 132.00, 128.56, 127.92, 127.24, 126.43, 124.62, 122.74, 115.61, 95.85, 69.18, 22.61, 21.26; HRMS (ESI)  $m/z$  calcd for  $\text{C}_{19}\text{H}_{18}\text{NO}_2^+ [\text{M}+\text{H}]^+$  292.1338, found 292.1346.

**4b-(*m*-tolyl)-3,4b-dihydrocyclohepta[3,4]pyrrolo[1,2-*b*][1,2]oxazin-10(2*H*)-one (36).**

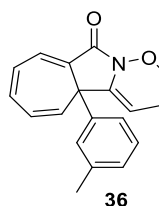

Yellow solid, 48 mg, 82% yield, M.p. = 158-160 °C.  $^1\text{H}$  NMR (500 MHz,  $\text{CDCl}_3$ )  $\delta$  7.25 (s, 1H),

7.04 (t,  $J = 7.4$  Hz, 1H), 7.01 – 6.89 (m, 3H), 6.45 (d,  $J = 8.9$  Hz, 3H), 6.08 (d,  $J = 8.8$  Hz, 1H), 5.05 (s, 1H), 4.26-4.19 (m, 2H), 2.44 – 2.27 (m, 2H), 2.24 (s, 3H);  $^{13}\text{C}$  NMR (125 MHz,  $\text{CDCl}_3$ )  $\delta$  157.71, 143.02, 141.10, 137.44, 133.69, 129.21, 128.64, 128.08, 128.05, 127.56, 127.41, 126.45, 125.39, 122.92, 95.05, 69.31, 49.79, 22.62, 21.51; HRMS (ESI)  $m/z$  calcd for  $\text{C}_{19}\text{H}_{18}\text{NO}_2^+$   $[\text{M}+\text{H}]^+$  292.1338, found 292.1346.

**4b-(2-methoxyphenyl)-3,4b-dihydrocyclohepta[3,4]pyrrolo[1,2-*b*][1,2]oxazin-10(2*H*)-one (37).**

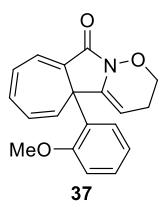

Yellow solid, 41 mg, 67% yield, M.p. = 147-149 °C.  $^1\text{H}$  NMR (500 MHz,  $\text{CDCl}_3$ )  $\delta$  7.15 (t,  $J = 7.7$  Hz, 1H), 7.08-7.01 (m, 2H), 6.81 (d,  $J = 8.1$  Hz, 1H), 6.74 (t,  $J = 7.6$  Hz, 1H), 6.46-6.38 (m, 3H), 5.90 (d,  $J = 9.1$  Hz, 1H), 5.01 (s, 1H), 4.33-4.23(m, 2H), 3.76 (s, 3H), 2.42-2.27 (m, 2H);  $^{13}\text{C}$  NMR (125 MHz,  $\text{CDCl}_3$ )  $\delta$  158.29, 157.76, 142.93, 132.48, 128.37, 128.27, 127.85, 127.36, 127.02, 126.87, 122.86, 119.19, 112.17, 94.31, 69.14, 55.51, 48.48, 22.78; HRMS (ESI)  $m/z$  calcd for  $\text{C}_{19}\text{H}_{18}\text{NO}_3^+$   $[\text{M}+\text{H}]^+$  308.1287, found 308.1293.

**4b-(3-methoxyphenyl)-3,4b-dihydrocyclohepta[3,4]pyrrolo[1,2-*b*][1,2]oxazin-10(2*H*)-one (38).**

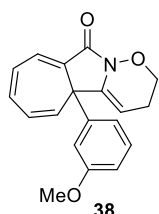

Yellow solid, 50 mg, 82% yield, M.p. = 154-156 °C.  $^1\text{H}$  NMR (500 MHz,  $\text{CDCl}_3$ )  $\delta$  7.25 (s, 1H), 7.09 (t,  $J = 8.3$  Hz, 1H), 6.75 (d,  $J = 7.8$  Hz, 1H), 6.72 – 6.66 (m, 2H), 6.52 – 6.43 (m, 3H), 6.07 (d,  $J = 9.9$  Hz, 1H), 5.07 (t,  $J = 4.2$  Hz, 1H), 4.31-4.18 (m, 2H), 3.73 (s, 3H), 2.45 – 2.28 (m, 2H);  $^{13}\text{C}$  NMR (125 MHz,  $\text{CDCl}_3$ )  $\delta$  158.91, 157.57, 142.78, 133.72, 128.98, 128.76, 128.70, 127.84, 127.55, 125.45, 118.40, 112.50, 111.79, 95.18, 69.30, 55.16, 49.81, 22.64; HRMS (ESI)  $m/z$  calcd for  $\text{C}_{19}\text{H}_{18}\text{NO}_3^+$   $[\text{M}+\text{H}]^+$  308.1287, found 308.1288.

**4b-(2-chlorophenyl)-3,4b-dihydrocyclohepta[3,4]pyrrolo[1,2-*b*][1,2]oxazin-10(2*H*)-one (39).**

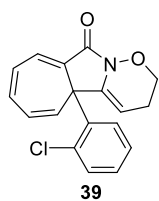

Yellow solid, 54 mg, 86% yield, M.p. = 168-170 °C.  $^1\text{H}$  NMR (500 MHz,  $\text{CDCl}_3$ )  $\delta$  7.23 (t,  $J = 8.1$  Hz, 2H), 7.11 (t,  $J = 6.7$  Hz, 2H), 7.05 (t,  $J = 7.3$  Hz, 1H), 6.54 – 6.42 (m, 3H), 5.80 (d,  $J = 9.1$  Hz, 1H), 5.08 (s, 1H), 4.35-4.22 (m, 2H), 2.49 – 2.27 (m, 2H);  $^{13}\text{C}$  NMR (125 MHz,  $\text{CDCl}_3$ )  $\delta$  158.03, 141.11, 134.99, 133.61, 132.40, 131.49, 129.62, 128.48, 128.37, 126.97, 125.35, 123.31, 122.36, 95.76, 68.90, 48.32, 22.68; HRMS (ESI)  $m/z$  calcd for  $\text{C}_{18}\text{H}_{15}\text{ClNO}_2^+$   $[\text{M}+\text{H}]^+$  312.0791, found 312.0799.

**4b-(3-chlorophenyl)-3,4b-dihydrocyclohepta[3,4]pyrrolo[1,2-*b*][1,2]oxazin-10(2*H*)-one (40).**

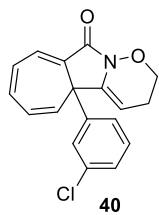

Yellow solid, 60 mg, 96% yield, M.p. = 168-170 °C.  $^1\text{H}$  NMR (500 MHz,  $\text{CDCl}_3$ )  $\delta$  7.26 (t,  $J = 2.7$  Hz, 1H), 7.15 – 7.06 (m, 3H), 7.03 (d,  $J = 7.6$  Hz, 1H), 6.51-6.45 (m, 3H), 6.08-6.02 (m, 1H), 5.06 (t,  $J = 4.3$  Hz, 1H), 4.31-4.18 (m, 2H), 2.47 – 2.26 (m, 2H);  $^{13}\text{C}$  NMR (125 MHz,  $\text{CDCl}_3$ )  $\delta$  157.30, 143.11, 142.27, 133.78, 129.03, 128.80, 128.38, 127.84, 127.54, 127.40, 126.01, 125.61, 123.96, 95.54, 69.25, 49.49, 22.57; HRMS (ESI)  $m/z$  calcd for  $\text{C}_{18}\text{H}_{15}\text{ClNO}_2^+$   $[\text{M}+\text{H}]^+$  308.1287, found 308.1288.

**4b-(3,5-dimethylphenyl)-3,4b-dihydrocyclohepta[3,4]pyrrolo[1,2-b][1,2]oxazin-10(2H)-one (41).**

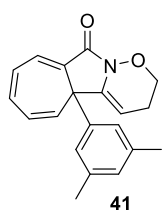

found 306.1499.

Yellow solid, 49 mg, 80% yield, M.p. = 163-165 °C. <sup>1</sup>H NMR (500 MHz, CDCl<sub>3</sub>) δ 7.27-7.23 (m, 1H), 6.79 (s, 1H), 6.75 (s, 2H), 6.52 – 6.40 (m, 3H), 6.08 (d, *J* = 9.6 Hz, 1H), 5.06 (t, *J* = 4.1 Hz, 1H), 4.29-4.22 (m, 2H), 2.45 – 2.27 (m, 2H), 2.21 (s, 6H); <sup>13</sup>C NMR (125 MHz, CDCl<sub>3</sub>) δ 157.72, 143.06, 141.08, 137.11, 133.60, 129.24, 128.98, 128.54, 128.06, 127.29, 125.32, 123.52, 109.94, 94.88, 69.25, 49.70, 22.58, 21.33; HRMS (ESI) *m/z* calcd for C<sub>20</sub>H<sub>20</sub>NO<sub>2</sub> + [M+H]<sup>+</sup> 306.1494,

**4b-(3,5-bis(trifluoromethyl)phenyl)-3,4b-dihydrocyclohepta[3,4]pyrrolo[1,2-b][1,2]oxazin-10(2H)-one (42).**

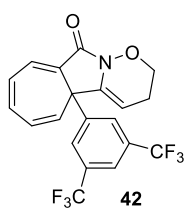

for C<sub>20</sub>H<sub>14</sub>F<sub>6</sub>NO<sub>2</sub><sup>+</sup> [M+H]<sup>+</sup> 414.0929, found 414.0928.

Yellow solid, 70 mg, 84% yield, M.p. = 158-160 °C. <sup>1</sup>H NMR (500 MHz, CDCl<sub>3</sub>) δ 7.67 (s, 1H), 7.57 (s, 2H), 7.33 (d, *J* = 5.3 Hz, 1H), 6.60-6.47 (m, 3H), 6.12 (d, *J* = 9.8 Hz, 1H), 5.09 (t, *J* = 4.3 Hz, 1H), 4.34 – 4.18 (m, 2H), 2.51 – 2.29 (m, 2H); <sup>13</sup>C NMR (125 MHz, CDCl<sub>3</sub>) δ 156.90, 143.56, 141.46, 133.95, 131.13 (q, <sup>2</sup>*J*<sub>CF</sub> = 33.2 Hz), 129.13, 128.47, 127.79, 126.90, 126.06, 125.92, 123.02 (q, <sup>1</sup>*J*<sub>CF</sub> = 271.3 Hz), 121.34, 96.34, 69.24, 49.37, 22.56; HRMS (ESI) *m/z* calcd

**4b-(pyridin-2-yl)-3,4b-dihydrocyclohepta[3,4]pyrrolo[1,2-b][1,2]oxazin-10(2H)-one (43)**

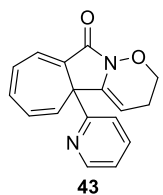

127.26, 126.83, 125.61, 122.07, 120.08, 99.99, 95.75, 69.30, 51.89, 22.68; HRMS (ESI) *m/z* calcd for C<sub>17</sub>H<sub>15</sub>N<sub>2</sub>O<sub>2</sub><sup>+</sup> [M+H]<sup>+</sup> 279.1134, found 279.1132.

Yellow solid, 45 mg, 81% yield, M.p. = 164-166 °C. <sup>1</sup>H NMR (500 MHz, CDCl<sub>3</sub>) δ 8.45 (d, *J* = 4.4 Hz, 1H), 7.48-7.41 (m, 1H), 7.30 (d, *J* = 6.0 Hz, 1H), 7.09 – 6.98 (m, 2H), 6.50-6.37 (m, 3H), 6.18 (d, *J* = 9.7 Hz, 1H), 5.29 (t, *J* = 4.3 Hz, 1H), 4.28-4.17 (m, 2H), 2.46 – 2.26 (m, 2H); <sup>13</sup>C NMR (125 MHz, CDCl<sub>3</sub>) δ 159.76, 157.51, 149.24, 140.99, 135.90, 133.65, 130.08, 128.36,

**4b-(thiophen-2-yl)-3,4b-dihydrocyclohepta[3,4]pyrrolo[1,2-b][1,2]oxazin-10(2H)-one (44).**

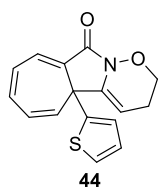

C<sub>16</sub>H<sub>14</sub>NO<sub>2</sub>S<sup>+</sup> [M+H]<sup>+</sup> 284.0745, found 284.0753.

Yellow solid, 47 mg, 83% yield, M.p. = 161-163 °C. <sup>1</sup>H NMR (500 MHz, CDCl<sub>3</sub>) δ 7.25 – 7.18 (m, 1H), 7.10 – 6.99 (m, 1H), 6.80-6.76 (m, 1H), 6.74 – 6.68 (m, 1H), 6.59-6.52 (m, 2H), 6.46 – 6.36 (m, 1H), 6.08 (d, *J* = 10.0 Hz, 1H), 5.20 (t, *J* = 4.3 Hz, 1H), 4.32-4.20 (m, 2H), 2.50 – 2.33 (m, 2H); <sup>13</sup>C NMR (125 MHz, CDCl<sub>3</sub>) δ 156.92, 145.18, 142.26, 133.69, 128.76, 128.73, 128.03, 127.94, 125.94, 125.75, 124.51, 123.71, 95.54, 69.23, 46.94, 22.61; HRMS (ESI) *m/z* calcd for

**4b-((8*R*,9*S*,13*S*,14*S*)-3-methoxy-13-methyl-17-oxo-7,8,9,11,12,13,14,15,16,17-decahydro-6*H*-cyclopenta[*a*]phenanthren-2-yl)-3,4b-dihydrocyclohepta[3,4]pyrrolo[1,2-b][1,2]oxazin-10(2H)-one (45)**

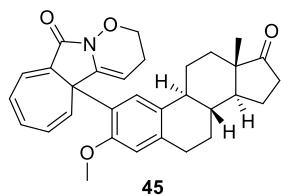

Yellow solid, 44 mg, 45% yield, M.p. = 130-132 °C. <sup>1</sup>H NMR (400 MHz, CDCl<sub>3</sub>) δ 7.11 – 6.99 (m, 1H), 6.94 (d, *J* = 14.2 Hz, 1H), 6.66 – 6.32 (m, 4H), 5.90 (dd, *J* = 33.8, 9.4 Hz, 1H), 5.05 (d, *J* = 51.7 Hz, 1H), 4.30-4.20 (m, 2H), 3.72 (d, *J* = 5.1 Hz, 3H), 2.91

– 2.75 (m, 2H), 2.54–2.45 (m, 1H), 2.42 – 2.31 (m, 2H), 2.29 – 2.22 (m, 1H), 2.20 – 2.09 (m, 2H), 2.04 – 1.91 (m, 3H), 1.68 – 1.58 (m, 2H), 1.47 – 1.31 (m, 4H), 0.89 (d, 3H); <sup>13</sup>C NMR (101 MHz, CDCl<sub>3</sub>) δ 158.32, 158.26, 155.62, 155.57, 143.23, 143.02, 136.49, 136.47, 132.67, 132.39, 130.28, 130.03, 128.38, 128.12, 127.41, 127.16, 126.49, 125.33, 125.01, 124.29, 123.94, 123.24, 122.82, 112.59, 112.51, 94.41, 94.11, 69.13, 55.58, 55.55, 50.36, 50.31, 48.56, 48.54, 48.04, 48.02, 44.03, 43.97, 38.32, 38.30, 35.88, 35.86, 31.60, 31.57, 29.45, 29.36, 26.40, 26.34, 26.08, 26.05, 22.79, 21.57, 21.54, 13.91, 13.90; HRMS (ESI) m/z calcd for C<sub>31</sub>H<sub>34</sub>NO<sub>4</sub><sup>+</sup> [M+H]<sup>+</sup> 484.2488, found 484.2488.

**(E)-4b-styryl-3,4b-dihydrocyclohepta[3,4]pyrrolo[1,2-b][1,2]oxazin-10(2H)-one (46)**

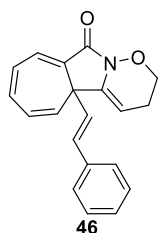

Yellow solid, 46 mg, 76% yield, M.p. = 119–121 °C. <sup>1</sup>H NMR (500 MHz, CDCl<sub>3</sub>) δ 7.33 – 7.19 (m, 6H), 6.65 – 6.57 (m, 2H), 6.47–6.41 (m, 1H), 6.25 (d, *J* = 15.8 Hz, 1H), 5.83 (d, *J* = 10.2 Hz, 1H), 5.77 (d, *J* = 15.8 Hz, 1H), 5.23 (t, *J* = 4.2 Hz, 1H), 4.41–4.27 (m, 2H), 2.51 (q, *J* = 5.0 Hz, 2H); <sup>13</sup>C NMR (125 MHz, CDCl<sub>3</sub>) δ 157.30, 140.81, 136.31, 133.49, 128.57, 128.52, 128.30, 127.63, 127.48, 127.43, 126.45, 126.36, 125.98, 124.43, 95.43, 69.35, 47.91, 22.73; HRMS (ESI) m/z calcd for C<sub>20</sub>H<sub>17</sub>NO<sub>2</sub>Na<sup>+</sup> [M+Na]<sup>+</sup> 326.1157, found 326.1159.

**(E)-4b-(2-methylstyryl)-3,4b-dihydrocyclohepta[3,4]pyrrolo[1,2-b][1,2]oxazin-10(2H)-one (47)**

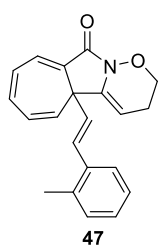

Yellow solid, 41 mg, 64% yield, M.p. = 112–114 °C. <sup>1</sup>H NMR (400 MHz, CDCl<sub>3</sub>) δ 7.24 – 7.19 (m, 2H), 7.13 – 7.06 (m, 3H), 6.64 – 6.53 (m, 2H), 6.46 – 6.33 (m, 2H), 5.80 (d, *J* = 10.2 Hz, 1H), 5.55 (d, *J* = 15.6 Hz, 1H), 5.20 (t, *J* = 4.2 Hz, 1H), 4.38–4.24 (m, 2H), 2.48 (q, *J* = 5.0 Hz, 2H), 2.21 (s, 3H); <sup>13</sup>C NMR (125 MHz, CDCl<sub>3</sub>) δ 157.31, 140.95, 135.68, 135.37, 133.44, 130.16, 128.24, 127.60, 127.53, 127.48, 126.68, 126.45, 126.01, 125.97, 125.67, 125.14, 95.34, 69.37, 48.18, 22.76, 19.79; HRMS (ESI) m/z calcd for C<sub>21</sub>H<sub>19</sub>NO<sub>2</sub>Na<sup>+</sup> [M+Na]<sup>+</sup> 340.1313, found 340.1311.

**(E)-4b-(4-methylstyryl)-3,4b-dihydrocyclohepta[3,4]pyrrolo[1,2-b][1,2]oxazin-10(2H)-one (48)**

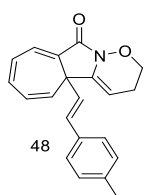

Yellow solid, 46 mg, 72% yield, M.p. = 112–114 °C. <sup>1</sup>H NMR (500 MHz, CDCl<sub>3</sub>) δ 7.22 – 7.18 (m, 1H), 7.12 (d, *J* = 8.0 Hz, 2H), 7.06 (d, *J* = 7.9 Hz, 2H), 6.60 – 6.53 (m, 2H), 6.42–6.34 (m, 1H), 6.17 (d, *J* = 15.8 Hz, 1H), 5.79 (d, *J* = 10.2 Hz, 1H), 5.67 (d, *J* = 15.8 Hz, 1H), 5.18 (t, *J* = 4.2 Hz, 1H), 4.37–4.23 (m, 2H), 2.47 (q, *J* = 4.9 Hz, 2H), 2.30 (s, 3H); <sup>13</sup>C NMR (100 MHz, CDCl<sub>3</sub>) δ 157.36, 140.93, 137.51, 133.52, 129.21, 128.42, 128.29, 127.54, 127.40, 126.45, 126.35, 125.94, 123.44, 95.34, 69.35, 47.91, 22.74, 21.15; HRMS (ESI) m/z calcd for C<sub>21</sub>H<sub>19</sub>NO<sub>2</sub>Na<sup>+</sup> [M+Na]<sup>+</sup> 340.1315, found 340.1315.

**(E)-4b-(4-bromostyryl)-3,4b-dihydrocyclohepta[3,4]pyrrolo[1,2-b][1,2]oxazin-10(2H)-one (49)**

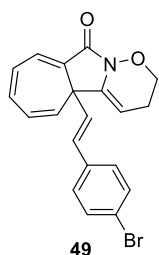

Yellow solid, 63 mg, 82% yield, M.p. = 112–114 °C. <sup>1</sup>H NMR (500 MHz, CDCl<sub>3</sub>) δ 7.37 (d, *J* = 8.1 Hz, 2H), 7.21 (t, *J* = 3.6 Hz, 1H), 7.08 (d, *J* = 8.1 Hz, 2H), 6.57 (t, *J* = 3.6 Hz, 2H), 6.42 – 6.36 (m, 1H), 6.14 (d, *J* = 15.7 Hz, 1H), 5.78 (d, *J* = 10.2 Hz, 1H), 5.71 (d, *J* = 15.8 Hz, 1H), 5.18 (t, *J* = 4.3 Hz, 1H), 4.36–4.23 (m, 2H), 2.50–2.46 (m, 2H); <sup>13</sup>C NMR (125 MHz, CDCl<sub>3</sub>) δ 156.73, 140.08, 134.76, 132.99, 131.08, 128.32, 127.82, 127.49, 127.08, 126.99, 126.71, 125.57, 124.64, 120.90,

95.09, 68.84, 47.40, 18.68; **HRMS (ESI)**  $m/z$  calcd for  $C_{20}H_{16}BrNO_2Na^+$   $[M+Na]^+$  404.0262, found 404.0248.

**(E)-4b-(4-(trifluoromethyl)styryl)-3,4b-dihydrocyclohepta[3,4]pyrrolo[1,2-b][1,2]oxazin-10(2H)-one (50)**

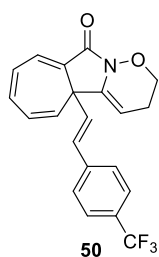

Yellow solid, 62 mg, 84% yield, M.p. = 102-105 °C.  **$^1H$  NMR (400 MHz,  $CDCl_3$ )**  $\delta$  7.50 (d,  $J$  = 8.0 Hz, 2H), 7.32 (d,  $J$  = 8.1 Hz, 2H), 7.25 – 7.20 (m, 1H), 6.59 (t,  $J$  = 3.6 Hz, 2H), 6.45 – 6.39 (m, 1H), 6.23 (d,  $J$  = 15.8 Hz, 1H), 5.81 (d,  $J$  = 15.8 Hz, 1H), 5.80 (d,  $J$  = 10.2 Hz, 1H), 5.21 (t,  $J$  = 4.3 Hz, 1H), 4.37-4.26 (m, 2H), 2.49 (q,  $J$  = 4.7 Hz, 2H);  **$^{13}C$  NMR (100 MHz,  $CDCl_3$ )**  $\delta$  157.18, 140.44, 139.82, 133.53, 129.43 (q,  $^3J_{C,F}$  = 32.4 Hz), 128.37, 127.75, 127.44 (q,  $^1J_{C,F}$  = 278.6 Hz), 127.38, 127.03, 126.95, 126.64, 126.19, 125.45 (q,  $^3J_{C,F}$  = 3.8 Hz), 95.72, 69.35, 47.94, 22.72;

**HRMS (ESI)**  $m/z$  calcd for  $C_{21}H_{16}F_3NO_2Na^+$   $[M+Na]^+$  394.1031, found 394.1028.

**(E)-4b-(3-methylstyryl)-3,4b-dihydrocyclohepta[3,4]pyrrolo[1,2-b][1,2]oxazin-10(2H)-one (51)**

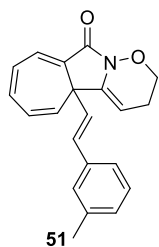

Yellow solid, 44 mg, 69% yield, M.p. = 110-112 °C.  **$^1H$  NMR (400 MHz,  $CDCl_3$ )**  $\delta$  7.23 – 7.18 (m, 1H), 7.14 (t,  $J$  = 7.5 Hz, 1H), 7.04-6.99 (m, 3H), 6.60 – 6.53 (m, 2H), 6.40-6.36 (m, 1H), 6.18 (d,  $J$  = 15.8 Hz, 1H), 5.78 (d,  $J$  = 10.2 Hz, 1H), 5.71 (d,  $J$  = 15.8 Hz, 1H), 5.18 (t,  $J$  = 4.2 Hz, 1H), 4.35-4.22 (m, 2H), 2.46 (q,  $J$  = 4.9 Hz, 2H), 2.29 (s, 3H);  **$^{13}C$  NMR (125 MHz,  $CDCl_3$ )**  $\delta$  157.35, 140.86, 138.11, 136.24, 133.51, 128.66, 128.43, 128.29, 127.47, 127.45, 127.12, 126.37, 125.99, 124.19, 123.64, 95.45, 69.36, 47.93, 22.73, 21.34; **HRMS (ESI)**  $m/z$  calcd for  $C_{21}H_{19}NO_2Na^+$

$[M+Na]^+$  340.1313, found 340.1313.

**(E)-4b-(2-(naphthalen-2-yl)vinyl)-3,4b-dihydrocyclohepta[3,4]pyrrolo[1,2-b][1,2]oxazin-10(2H)-one (52)**

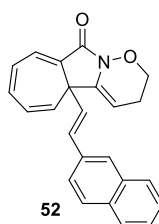

Yellow solid, 49 mg, 69% yield, M.p. = 99-102 °C.  **$^1H$  NMR (400 MHz,  $CDCl_3$ )**  $\delta$  7.94 (d,  $J$  = 5.7 Hz, 1H), 7.81-7.70 (m, 3H), 7.60 (s, 1H), 7.46 – 7.39 (m, 3H), 7.25 – 7.19 (m, 1H), 6.60 (s, 2H), 6.47 – 6.32 (m, 2H), 5.91 – 5.79 (m, 2H), 4.38-4.24 (m, 2H), 2.49 (q,  $J$  = 5.0 Hz, 2H);  **$^{13}C$  NMR (100 MHz,  $CDCl_3$ )**  $\delta$  157.35, 140.85, 134.73, 133.74, 133.55, 132.94, 130.92, 128.84, 128.72, 128.37, 128.15, 127.88, 127.61, 127.44, 126.48, 126.30, 126.07, 125.91, 124.79, 123.52, 65.58, 48.04, 19.20; **HRMS (ESI)**  $m/z$  calcd for  $C_{24}H_{20}NO_2^+$   $[M+H]^+$  354.1594, found 354.1496.

**4b-(1H-inden-2-yl)-3,4b-dihydrocyclohepta[3,4]pyrrolo[1,2-b][1,2]oxazin-10(2H)-one (53)**

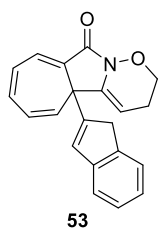

Yellow solid, 49 mg, 78% yield, M.p. = 134-136 °C.  **$^1H$  NMR (500 MHz,  $CDCl_3$ )**  $\delta$  7.31 (d,  $J$  = 7.4 Hz, 1H), 7.27-7.18 (m, 3H), 7.13-7.07 (m, 1H), 6.59 – 6.47 (m, 2H), 6.47 – 6.39 (m, 2H), 5.93 (d,  $J$  = 10.2 Hz, 1H), 5.15 (t,  $J$  = 4.3 Hz, 1H), 4.30 (t,  $J$  = 5.3 Hz, 2H), 3.18 (s, 2H), 2.51 – 2.33 (m, 2H);  **$^{13}C$  NMR (125 MHz,  $CDCl_3$ )**  $\delta$  157.41, 144.80, 143.71, 142.93, 141.38, 133.90, 128.47, 128.02, 127.70, 127.50, 127.41, 126.46, 125.73, 124.60, 123.63, 120.75, 95.33, 69.31, 48.12, 36.89, 22.70; **HRMS (ESI)**  $m/z$  calcd for  $C_{21}H_{17}NO_2Na^+$   $[M+Na]^+$  338.1157, found 338.1159.

**(Z)-4b-(2-fluoro-2-phenylvinyl)-3,4b-dihydrocyclohepta[3,4]pyrrolo[1,2-b][1,2]oxazin-10(2H)-one (54)**

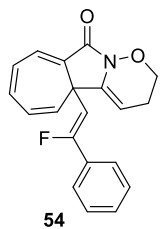

54

Yellow solid, 59 mg, 92% yield, M.p. = 108-110 °C. <sup>1</sup>H NMR (500 MHz, CDCl<sub>3</sub>) δ 7.36 – 7.28 (m, 5H), 7.12 – 7.04 (m, 1H), 6.71 – 6.62 (m, 2H), 6.32-6.25 (m, 1H), 5.98 (d, *J* = 11.4 Hz, 1H), 5.38 (t, *J* = 4.2 Hz, 1H), 5.17 (d, *J* = 38.8 Hz, 1H), 4.32 (t, *J* = 5.2 Hz, 2H), 2.54-2.38 (m, 2H); <sup>13</sup>C NMR (125 MHz, CDCl<sub>3</sub>) δ 158.00 (d, <sup>1</sup>*J*<sub>C,F</sub> = 254.9 Hz), 141.57, 133.70, 131.61 (d, <sup>2</sup>*J*<sub>C,F</sub> = 27.7 Hz), 129.22, 128.80, 128.67, 128.45, 126.57, 125.92, 124.37, 124.15, 124.11, 108.06 (d, <sup>2</sup>*J*<sub>C,F</sub> = 11.1 Hz), 95.35, 69.29, 43.59, 22.78; HRMS (ESI) *m/z* calcd for C<sub>20</sub>H<sub>17</sub>FNO<sub>2</sub><sup>+</sup> [M+H]<sup>+</sup> 322.1243, found 322.1247.

**(Z)-4b-(2-fluoro-2-(thiophen-2-yl)vinyl)-3,4b-dihydrocyclohepta[3,4]pyrrolo[1,2-b][1,2]oxazin-10(2H)-one (55)**

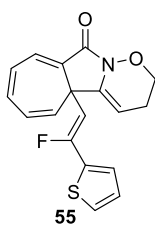

55

Yellow solid, 56 mg, 85% yield, M.p. = 110-112 °C. <sup>1</sup>H NMR (400 MHz, CDCl<sub>3</sub>) δ 7.23 – 7.17 (m, 1H), 7.12 – 7.03 (m, 2H), 6.97 – 6.93 (m, 1H), 6.70 – 6.65 (m, 2H), 6.31-6.24 (m, 1H), 6.00 – 5.89 (m, 1H), 5.36 (t, *J* = 4.2 Hz, 1H), 4.99 (d, *J* = 37.9 Hz, 1H), 4.32 (t, *J* = 5.2 Hz, 2H), 2.52 – 2.42 (m, 2H); <sup>13</sup>C NMR (100 MHz, CDCl<sub>3</sub>) δ 156.86, 153.67 (d, <sup>1</sup>*J*<sub>C,F</sub> = 252.0 Hz), 141.37, 134.86 (d, <sup>2</sup>*J*<sub>C,F</sub> = 33.5 Hz), 133.71, 128.83, 128.36, 127.49, 126.37, 126.07, 126.02, 124.90 (d, <sup>3</sup>*J*<sub>C,F</sub> = 4.0 Hz), 124.49, 107.31 (d, <sup>2</sup>*J*<sub>C,F</sub> = 11.0 Hz), 95.37, 69.28,

43.59, 22.80; HRMS (ESI) *m/z* calcd for C<sub>18</sub>H<sub>15</sub>FNO<sub>2</sub>S<sup>+</sup> [M+H]<sup>+</sup> 328.0808, found 328.0808.

**(E)-7-methyl-4b-styryl-3,4b-dihydrocyclohepta[3,4]pyrrolo[1,2-b][1,2]oxazin-10(2H)-one (56)**

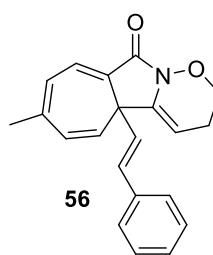

56

Yellow solid, 47 mg, 74% yield, M.p. = 120-122 °C. <sup>1</sup>H NMR (500 MHz, CDCl<sub>3</sub>) δ 7.30-7.18 (m, 5H), 7.10 (d, *J* = 6.6 Hz, 1H), 6.36 (d, *J* = 6.5 Hz, 1H), 6.27 – 6.16 (m, 2H), 5.80 – 5.64 (m, 2H), 5.15 (t, *J* = 4.2 Hz, 1H), 4.34 – 4.25 (m, 2H), 2.50 – 2.43 (m, 2H), 2.05 (s, 3H); <sup>13</sup>C NMR (125 MHz, CDCl<sub>3</sub>) δ 157.70, 143.46, 140.96, 136.49, 130.97, 128.52, 128.37, 127.58, 126.42, 125.95, 125.38, 124.90, 124.37, 95.12, 69.33, 47.52, 25.26, 22.74;

HRMS (ESI) *m/z* calcd for C<sub>21</sub>H<sub>20</sub>NO<sub>2</sub><sup>+</sup> [M+H]<sup>+</sup> 318.1494, found 318.1497.

**(E)-7-bromo-4b-styryl-3,4b-dihydrocyclohepta[3,4]pyrrolo[1,2-b][1,2]oxazin-10(2H)-one (57)**

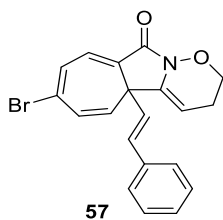

57

Yellow solid, 63 mg, 82% yield, M.p. = 118-120 °C. <sup>1</sup>H NMR (500 MHz, CDCl<sub>3</sub>) δ 7.35 – 7.29 (m, 4H), 7.28-7.23 (m, 1H), 7.03 (s, 2H), 6.60 (d, *J* = 10.5 Hz, 1H), 6.31 (d, *J* = 15.8 Hz, 1H), 5.73 (d, *J* = 6.8 Hz, 1H), 5.23 (t, *J* = 4.3 Hz, 1H), 4.40-4.29 (m, 2H), 2.50-2.43 (m, 2H); <sup>13</sup>C NMR (125 MHz, CDCl<sub>3</sub>) δ 156.87, 140.20, 136.08, 131.72, 130.53, 129.43, 128.59, 128.03, 127.89, 127.47, 126.56, 124.53, 123.35, 96.12, 69.41, 47.67, 22.67; HRMS

(ESI) *m/z* calcd for C<sub>20</sub>H<sub>16</sub>BrNO<sub>2</sub>Na<sup>+</sup> [M+Na]<sup>+</sup> 404.0262, found 404.0260.

**(E)-4b-styryl-7-(trifluoromethyl)-3,4b-dihydrocyclohepta[3,4]pyrrolo[1,2-b][1,2]oxazin-10(2H)-one (58)**

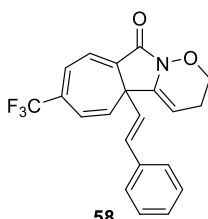

58

Yellow solid, 60 mg, 81% yield, M.p. = 116-118 °C. <sup>1</sup>H NMR (500 MHz, CDCl<sub>3</sub>) δ 7.26 (d, 2H), 7.21 (t, 4H), 7.06 (d, *J* = 6.3 Hz, 1H), 6.57 (d, *J* = 10.5 Hz, 1H), 6.23 (d, *J* = 15.8 Hz, 1H), 5.99 (d, *J* = 10.5 Hz, 1H), 5.64 (d, *J* = 15.8 Hz, 1H), 5.24 (t, *J* = 4.2 Hz,

1H), 4.39-4.26 (m, 2H), 2.49 (q,  $J = 4.8$  Hz, 2H);  $^{13}\text{C}$  NMR (100 MHz,  $\text{CDCl}_3$ )  $\delta$  156.07, 140.04, 135.82, 133.77 (q,  $^2J_{\text{C,F}} = 30.1$  Hz), 131.53, 129.74, 128.60, 127.97, 127.68, 126.50, 124.76 (q,  $^1J_{\text{C,F}} = 249.3$  Hz), 123.25, 123.07, 122.86, 99.99, 96.64, 69.49, 47.76, 22.62; HRMS (ESI)  $m/z$  calcd for  $\text{C}_{21}\text{H}_{16}\text{F}_3\text{NO}_2\text{Na}^+$   $[\text{M}+\text{Na}]^+$  394.1031, found 394.1029.

**(E)-7-nitro-4b-styryl-3,4b-dihydrocyclohepta[3,4]pyrrolo[1,2-*b*][1,2]oxazin-10(2H)-one (59)**

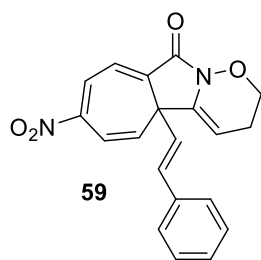

Yellow solid, 56 mg, 81% yield, M.p. = 117-120 °C.  $^1\text{H}$  NMR (400 MHz,  $\text{CDCl}_3$ )  $\delta$  8.04 – 7.93 (m, 1H), 7.36 (d,  $J = 7.3$  Hz, 1H), 7.29 (s, 1H), 7.25-7.16 (m, 5H), 6.23 (d,  $J = 15.8$  Hz, 1H), 6.08 (d,  $J = 10.7$  Hz, 1H), 5.66 (d,  $J = 15.8$  Hz, 1H), 5.33 (t,  $J = 4.3$  Hz, 1H), 4.38 – 4.30 (m, 2H), 2.52 (q,  $J = 5.1$  Hz, 2H);  $^{13}\text{C}$  NMR (100 MHz,  $\text{CDCl}_3$ )  $\delta$  155.40, 150.90, 139.75, 135.35, 134.38, 130.11, 129.49, 128.83, 128.66, 128.29, 126.58, 122.74, 121.72, 121.54, 97.28, 69.58, 48.03, 22.59; HRMS (ESI)  $m/z$  calcd for  $\text{C}_{20}\text{H}_{16}\text{N}_2\text{O}_4\text{Na}^+$   $[\text{M}+\text{Na}]^+$  371.1008, found 371.1013.

**4b-vinyl-3,4b-dihydrocyclohepta[3,4]pyrrolo[1,2-*b*][1,2]oxazin-10(2H)-one (60)**

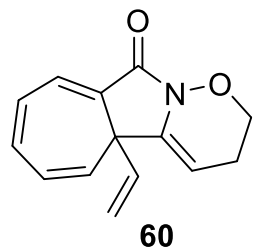

Yellow solid, 32 mg, 70% yield, M.p. = 114-116 °C.  $^1\text{H}$  NMR (500 MHz,  $\text{DMSO-}d_6$ )  $\delta$  6.98 (d,  $J = 6.8$  Hz, 1H), 6.58 (t,  $J = 4.0$  Hz, 2H), 6.42 – 6.33 (m, 1H), 5.73 (d,  $J = 10.2$  Hz, 1H), 5.42-5.33 (m, 1H), 5.26 (t,  $J = 4.3$  Hz, 1H), 4.89 (d,  $J = 10.1$  Hz, 1H), 4.77 (d,  $J = 17.0$  Hz, 1H), 4.28-4.14 (m, 2H), 2.37 (q,  $J = 4.7$  Hz, 2H);  $^{13}\text{C}$  NMR (101 MHz,  $\text{DMSO-}d_6$ )  $\delta$  156.47, 139.92, 133.98, 132.79, 128.32, 127.82, 127.71, 126.25, 125.69, 113.60, 96.45, 69.53, 48.42, 22.60; HRMS (ESI)  $m/z$  calcd for  $\text{C}_{14}\text{H}_{14}\text{NO}_2^+$   $[\text{M}+\text{H}]^+$  228.1025, found 228.1030.

**5-((4-chlorophenyl)ethynyl)-3,4-dihydro-[1,2]oxazino[2,3-*b*]isoquinolin-10(2H)-one (61)**

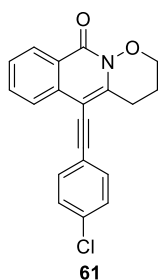

White solid, 48 mg, 72% yield, M.p. = 174-176 °C.  $^1\text{H}$  NMR (400 MHz,  $\text{CDCl}_3$ )  $\delta$  8.46 (d,  $J = 8.0$  Hz, 1H), 8.00 (d,  $J = 8.1$  Hz, 1H), 7.76 – 7.69 (m, 1H), 7.56 – 7.47 (m, 3H), 7.37 (d,  $J = 8.5$  Hz, 2H), 4.49 – 4.38 (m, 2H), 3.24 (t,  $J = 7.0$  Hz, 2H), 2.32 – 2.21 (m, 2H);  $^{13}\text{C}$  NMR (100 MHz,  $\text{CDCl}_3$ )  $\delta$  156.92, 144.85, 134.85, 134.44, 132.67, 132.55, 128.85, 127.91, 126.75, 125.01, 124.78, 121.59, 96.76, 94.97, 83.59, 71.09, 22.54, 21.30; HRMS (ESI)  $m/z$  calcd for  $\text{C}_{20}\text{H}_{14}\text{ClNO}_2\text{Na}^+$   $[\text{M}+\text{Na}]^+$  358.0611, found 358.0611.

**2,2,2-trifluoroethyl (1,1-diphenylbuta-1,3-dien-2-yl)carbamate (64)**

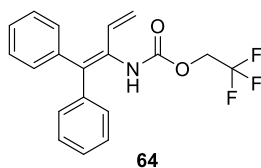

White solid, 39 mg, 70% yield, M.p. = 128-130 °C.  $^1\text{H}$  NMR (500 MHz,  $\text{CDCl}_3$ )  $\delta$  7.35 – 7.26 (m, 6H), 7.19 (t,  $J = 7.6$  Hz, 4H), 6.54-6.44 (m, 1H), 5.94 (s, 1H), 5.44 (d,  $J = 17.2$  Hz, 1H), 5.24 (d,  $J = 10.7$  Hz, 1H), 4.40 (s, 2H);  $^{13}\text{C}$  NMR (125 MHz,  $\text{CDCl}_3$ )  $\delta$  152.27, 140.36, 139.97, 139.79, 132.41, 130.68, 129.39, 129.15, 128.26, 128.06, 127.86, 127.69, 122.93 (q,  $^1J_{\text{C,F}} = 277.3$  Hz), 115.54, 60.93 (q,  $^2J_{\text{C,F}} = 34.8$  Hz); HRMS (ESI)  $m/z$  calcd for  $\text{C}_{19}\text{H}_{17}\text{F}_3\text{NO}_2^+$   $[\text{M}+\text{H}]^+$

348.1211, found 348.1212.

**4b-phenyl-3,4b,5,6,7,8-hexahydrocyclohepta[3,4]pyrrolo[1,2-*b*][1,2]oxazin-10(2*H*)-one (65)**

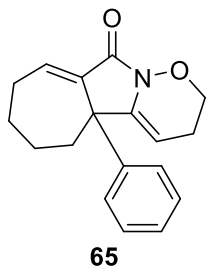

White solid, 48 mg, 85% yield, M.p. = 156-158 °C. <sup>1</sup>H NMR (500 MHz, CDCl<sub>3</sub>) δ 7.31 (d, *J* = 4.2 Hz, 4H), 7.26-7.16 (m, 2H), 4.95 (t, *J* = 4.1 Hz, 1H), 4.16-4.04 (m, 2H), 2.64 – 2.54 (m, 1H), 2.33 – 2.22 (m, 3H), 1.97-1.75 (m, 3H), 1.66 – 1.49 (m, 2H), 1.35 – 1.27 (m, 1H); <sup>13</sup>C NMR (125 MHz, CDCl<sub>3</sub>) δ 159.14, 142.54, 140.46, 137.65, 136.16, 128.85, 126.92, 126.47, 92.72, 69.05, 50.18, 36.53, 27.79, 26.85, 26.58, 22.55; HRMS (ESI) *m/z* calcd for C<sub>18</sub>H<sub>20</sub>NO<sub>2</sub><sup>+</sup> [M+H]<sup>+</sup> 282.1494, found 282.1494.

**4b-phenyl-3,4b,5,6,7,8,9,9a-octahydrocyclohepta[3,4]pyrrolo[1,2-*b*][1,2]oxazin-10(2*H*)-one (65')**

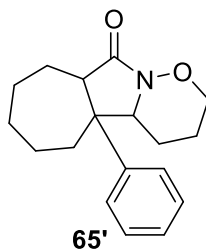

White solid, 51 mg, 90% yield, M.p. = 135-137 °C. <sup>1</sup>H NMR (500 MHz, CDCl<sub>3</sub>) δ 7.37 – 7.18 (m, 5H), 4.14 – 3.06 (m, 3H), 2.64 – 0.34 (m, 13H); <sup>13</sup>C NMR (125 MHz, CDCl<sub>3</sub>) δ 171.04, 164.20, 163.44, 147.64, 143.97, 139.38, 138.80, 138.09, 138.06, 136.08, 128.74, 128.63, 126.82, 126.78, 126.72, 126.63, 125.71, 71.76, 71.69, 71.58, 66.62, 65.65, 64.90, 50.98, 50.57, 49.71, 47.58, 36.49, 33.06, 30.05, 28.48, 27.89, 27.80, 27.65, 26.52, 26.39, 26.27, 26.26, 26.06, 25.96, 25.04, 24.49, 24.23, 24.21, 24.03; HRMS (ESI) *m/z* calcd for C<sub>18</sub>H<sub>21</sub>NO<sub>2</sub>Na<sup>+</sup> [M+Na]<sup>+</sup> 308.1627, found 308.1626.

**4-bromo-4b-phenyl-3,4b-dihydrocyclohepta[3,4]pyrrolo[1,2-*b*][1,2]oxazin-10(2*H*)-one (3')**

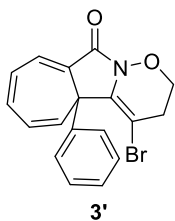

Yellow solid, 24.5 mg, 69% yield, M.p. = 135-137 °C. <sup>1</sup>H NMR (500 MHz, CDCl<sub>3</sub>) δ 7.22 – 7.07 (m, 6H), 6.73 – 6.57 (m, 2H), 6.44 (ddd, *J* = 8.4, 6.4, 2.3 Hz, 1H), 6.17 – 5.95 (m, 1H), 4.36 (t, *J* = 5.4 Hz, 2H), 2.85 – 2.61 (m, 2H); <sup>13</sup>C NMR (125 MHz, CDCl<sub>3</sub>) δ 157.39, 138.29, 136.74, 134.53, 128.80, 128.20, 127.93, 127.41, 127.18 (d, *J* = 4.3 Hz), 125.45, 125.23, 90.90, 69.82, 50.74, 32.96; HRMS (ESI) *m/z* calcd for C<sub>18</sub>H<sub>15</sub>BrNO<sub>2</sub><sup>+</sup> [M+Na]<sup>+</sup> 356.0286, found 356.0284.

**4b-phenyl-3,4b,5,5a-tetrahydrocyclopropa[3,4]pyrrolo[1,2-*b*][1,2]oxazin-6(2*H*)-one (66)**

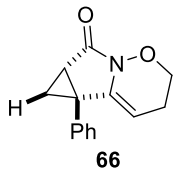

White solid (28 mg, 62%). M.p. = 135-137 °C. <sup>1</sup>H NMR (500 MHz, Chloroform-*d*): δ 7.29 – 7.39 (m, 5H), 4.86 – 4.73 (m, 1H), 4.44 – 4.29 (m, 1H), 4.26 – 4.11 (m, 1H), 2.43 (dq, *J* = 17.0, 5.2 Hz, 1H), 2.30 – 2.17 (m, 2H), 1.84 (dd, *J* = 8.4, 5.0 Hz, 1H), 1.49 – 1.36 (m, 1H). <sup>13</sup>C NMR (126 MHz, Chloroform-*d*): δ 164.76, 138.97, 135.73, 129.68, 128.72, 128.06, 96.69, 77.28, 77.03, 76.78, 69.28, 29.08, 24.23, 22.34, 21.35. HRMS (ESI-TOF, [M + Na]<sup>+</sup>): For C<sub>14</sub>H<sub>13</sub>NNaO<sub>2</sub>, 250.0844, Found: 250.0849.

**5-methyl-4b-phenyl-3,4b,5,5a-tetrahydrocyclopropa[3,4]pyrrolo[1,2-*b*][1,2]oxazin-6(2*H*)-one (67)**

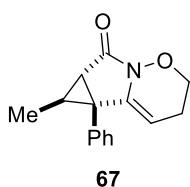

White solid (40 mg, 83%). M.p. = 156-158 °C. <sup>1</sup>H NMR (500 MHz, Chloroform-*d*): δ 7.54 – 7.22 (m, 5H), 4.81 (dd, *J* = 5.6, 3.0 Hz, 1H), 4.30 (ddd, *J* = 11.8, 5.5, 3.2 Hz, 1H), 4.15 – 3.97



(m, 1H), 2.40 (ddt,  $J = 15.5, 8.8, 4.0$  Hz, 1H), 2.13 (d,  $J = 3.5$  Hz, 2H), 1.79 – 1.66 (m, 1H), 0.97 (d,  $J = 6.2$  Hz, 3H).  $^{13}\text{C}$  NMR (126 MHz, Chloroform-*d*):  $\delta$  164.96, 139.02, 133.13, 130.37, 128.83, 128.07, 94.94, 77.29, 77.04, 76.78, 69.17, 33.85, 30.05, 29.05, 22.25, 14.45. HRMS (ESI-TOF,  $[\text{M} + \text{H}]^+$ ): For  $\text{C}_{15}\text{H}_{16}\text{NO}_2$ , 242.1181, Found: 242.1185.

**(*E*)-4b-phenyl-5-(prop-1-en-1-yl)-3,4b,5,5a-tetrahydrocyclopropa[3,4]pyrrolo[1,2-*b*][1,2]oxazin-6(2*H*)-one (68).**

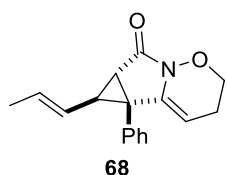

White solid (28 mg, 52%). M.p. = 128-130 °C.  $^1\text{H}$  NMR (500 MHz, DMSO-*d*6):  $\delta$  7.44 – 7.28 (m, 5H), 5.72 (dd,  $J = 15.1, 6.8$  Hz, 1H), 4.77 (dd,  $J = 5.1, 3.3$  Hz, 1H), 4.55 (ddd,  $J = 15.3, 9.5, 1.9$  Hz, 1H), 4.26 (dt,  $J = 10.8, 4.1$  Hz, 1H), 3.98 (ddd,  $J = 11.6, 8.2, 3.9$  Hz, 1H), 2.66 (d,  $J = 3.3$  Hz, 1H), 2.30 (ddd,  $J = 24.2, 7.9, 3.3$  Hz, 1H), 2.17 – 2.03 (m, 1H), 1.52 (dd,  $J = 6.6, 1.6$  Hz, 3H).  $^{13}\text{C}$  NMR (126 MHz, DMSO-*d*6):  $\delta$  163.12, 138.18, 133.10, 130.36, 128.58, 127.81, 127.73, 126.77, 94.92, 68.67, 39.99, 39.83, 39.66, 39.49, 39.33, 39.16, 38.99, 37.04, 33.53, 27.48, 21.78, 17.72. HRMS (ESI-TOF,  $[\text{M} + \text{H}]^+$ ): For  $\text{C}_{17}\text{H}_{18}\text{NO}_2$ , 268.1332, Found: 268.1336.

**5a-methyl-4b,5-diphenyl-3,4b,5,5a-tetrahydrocyclopropa[3,4]pyrrolo[1,2-*b*][1,2]oxazin-6(2*H*)-one (69).**

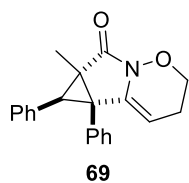

White solid (54 mg, 85%). M.p. = 174-176 °C.  $^1\text{H}$  NMR (500 MHz, Chloroform-*d*):  $\delta$  7.37 (t,  $J = 3.3$  Hz, 3H), 7.19 – 7.15 (m, 2H), 7.14 – 7.08 (m, 3H), 6.67 – 6.59 (m, 2H), 4.61 (t,  $J = 4.2$  Hz, 1H), 4.33 (dt,  $J = 9.7, 4.3$  Hz, 1H), 4.14 (ddd,  $J = 11.6, 8.7, 3.8$  Hz, 1H), 2.68 (s, 1H), 2.41 (ddd,  $J = 16.9, 8.6, 4.6$  Hz, 1H), 2.13 (dd,  $J = 17.2, 4.6$  Hz, 1H), 1.46 (s, 3H).  $^{13}\text{C}$  NMR (126 MHz, Chloroform-*d*):  $\delta$  167.60, 140.04, 134.10, 131.52, 131.01, 130.08, 128.85, 128.17, 127.59, 126.52, 95.20, 77.28, 77.03, 76.77, 69.33, 42.46, 36.60, 33.14, 22.51, 7.17. HRMS (ESI-TOF,  $[\text{M} + \text{H}]^+$ ): For  $\text{C}_{21}\text{H}_{20}\text{NO}_2$ , 318.1494, Found: 318.1493.

**5a-methyl-4b-phenyl-3,4b,5,5a-tetrahydrocyclopropa[3,4]pyrrolo[1,2-*b*][1,2]oxazin-6(2*H*)-one (70).**

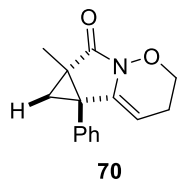

White solid (35 mg, 72%). M.p. = 114-116 °C.  $^1\text{H}$  NMR (500 MHz, Chloroform-*d*):  $\delta$  7.46 – 7.30 (m, 5H), 4.69 (t,  $J = 4.1$  Hz, 1H), 4.35 (dt,  $J = 9.5, 4.3$  Hz, 1H), 4.21 (dt,  $J = 6.2, 3.3$  Hz, 1H), 2.41 (ddt,  $J = 17.4, 8.6, 4.0$  Hz, 1H), 2.28 – 2.16 (m, 1H), 1.62 (d,  $J = 5.0$  Hz, 1H), 1.48 (d,  $J = 5.0$  Hz, 1H), 1.17 (s, 3H).  $^{13}\text{C}$  NMR (126 MHz, Chloroform-*d*):  $\delta$  166.73, 139.65, 134.14, 130.39, 128.59, 127.89, 96.09, 77.29, 77.04, 76.78, 69.46, 33.01, 28.47, 26.48, 22.46, 11.36. HRMS (ESI-TOF,  $[\text{M} + \text{H}]^+$ ): For  $\text{C}_{15}\text{H}_{16}\text{NO}_2$ , 242.1181, Found: 242.1183.

**4b-phenyl-5-propyl-3,4b,5,5a-tetrahydrocyclopropa[3,4]pyrrolo[1,2-*b*][1,2]oxazin-6(2*H*)-one (71).**

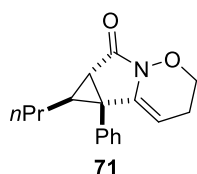

White solid (33 mg, 62%). M.p. = 116-118 °C.  $^1\text{H}$  NMR (500 MHz, Chloroform-*d*):  $\delta$  7.48 – 7.25 (m, 5H), 4.81 (dd,  $J = 5.5, 3.1$  Hz, 1H), 4.34 – 4.17 (m, 1H), 4.04 (ddd,  $J = 11.7, 9.0, 3.8$  Hz, 1H), 2.38 (dddd,  $J = 17.5, 8.8, 5.5, 3.1$  Hz, 1H), 2.19 – 2.02 (m, 2H), 1.64 (dt,  $J = 8.3, 3.8$  Hz, 1H), 1.41 (ddt,  $J = 13.4, 8.6, 5.1$  Hz, 4H), 0.85 (t,  $J = 7.1$  Hz, 3H).  $^{13}\text{C}$  NMR (126 MHz,

**Chloroform-*d***):  $\delta$  165.02, 138.95, 133.39, 131.54, 130.20, 128.79, 128.04, 94.97, 77.31, 77.06, 76.80, 69.16, 35.56, 33.57, 31.37, 27.91, 22.26, 21.82, 13.77. **HRMS (ESI-TOF, [M + H]<sup>+</sup>)**: For C<sub>17</sub>H<sub>20</sub>NO<sub>2</sub>, 270.1494, Found: 270.1499.

**4b,5-diphenyl-3,4b,5,5a-tetrahydrocyclopropa[3,4]pyrrolo[1,2-*b*][1,2]oxazin-6(2*H*)-one (72).**

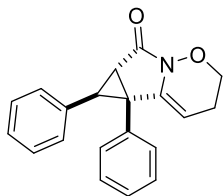

72

White solid (39 mg, 64%). M.p. = 118-120 °C. **<sup>1</sup>H NMR (500 MHz, Chloroform-*d*)**:  $\delta$  7.25 – 7.18 (m, 3H), 7.12 (dd, *J* = 6.5, 2.9 Hz, 2H), 7.08 – 7.02 (m, 3H), 6.75 (dd, *J* = 6.4, 3.0 Hz, 2H), 4.80 (dd, *J* = 5.4, 3.1 Hz, 1H), 4.33 (dt, *J* = 11.5, 4.2 Hz, 1H), 4.11 (ddd, *J* = 11.6, 8.9, 3.7 Hz, 1H), 2.88 (d, *J* = 3.7 Hz, 1H), 2.77 (d, *J* = 3.6 Hz, 1H), 2.42 (dddd, *J* = 14.1, 8.8, 5.2, 3.1 Hz, 1H), 2.19 – 2.07 (m, 1H). **<sup>13</sup>C NMR (126 MHz, Chloroform-*d*)**:  $\delta$  164.34, 139.11, 134.85, 131.91, 130.91, 128.58, 127.95, 127.48, 126.70, 95.85, 77.30, 77.05, 76.80, 69.28, 39.06, 36.51, 28.95, 22.31. **HRMS (ESI-TOF, [M + H]<sup>+</sup>)**: For C<sub>20</sub>H<sub>18</sub>NO<sub>2</sub>, 304.1338, Found: 304.1335.

**4b-phenyl-5-(*o*-tolyl)-3,4b,5,5a-tetrahydrocyclopropa[3,4]pyrrolo[1,2-*b*][1,2]oxazin-6(2*H*)-one (73).**

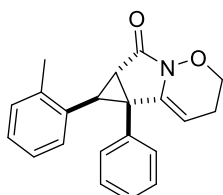

73

White solid (35 mg, 55%). M.p. = 110-112 °C. **<sup>1</sup>H NMR (500 MHz, Chloroform-*d*)**:  $\delta$  7.20 (d, *J* = 5.5 Hz, 3H), 7.12 (q, *J* = 6.1, 4.7 Hz, 3H), 7.01 (t, *J* = 7.5 Hz, 1H), 6.85 (t, *J* = 7.7 Hz, 1H), 6.43 (d, *J* = 7.8 Hz, 1H), 4.95 (dd, *J* = 5.5, 3.0 Hz, 1H), 4.45 – 4.34 (m, 1H), 4.16 (td, *J* = 11.2, 10.2, 3.6 Hz, 1H), 3.10 (d, *J* = 4.0 Hz, 1H), 2.90 (d, *J* = 3.9 Hz, 1H), 2.53 (s, 3H), 2.44 – 2.30 (m, 1H), 2.26 – 2.11 (m, 1H). **<sup>13</sup>C NMR (126 MHz, Chloroform-*d*)**:  $\delta$  164.67, 139.14, 137.11, 132.43, 132.24, 130.18, 129.93, 128.46, 127.84, 126.78, 125.59, 125.44, 95.75, 77.31, 77.05, 76.80, 69.31, 37.18, 35.85, 27.20, 22.30, 20.10. **HRMS (ESI-TOF, [M + H]<sup>+</sup>)**: For C<sub>21</sub>H<sub>20</sub>NO<sub>2</sub>, 318.1494, Found: 318.1498

**4b-phenyl-5-(*m*-tolyl)-3,4b,5,5a-tetrahydrocyclopropa[3,4]pyrrolo[1,2-*b*][1,2]oxazin-6(2*H*)-one (74).**

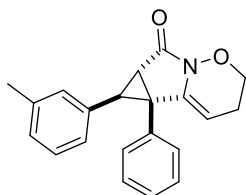

74

White solid (57 mg, 90%). M.p. = 108-110 °C. **<sup>1</sup>H NMR (500 MHz, Chloroform-*d*)**:  $\delta$  7.27 (dd, *J* = 5.1, 2.0 Hz, 3H), 7.17 (dd, *J* = 6.6, 3.0 Hz, 2H), 6.97 (t, *J* = 7.6 Hz, 1H), 6.91 (d, *J* = 7.5 Hz, 1H), 6.66 (s, 1H), 6.51 (d, *J* = 7.6 Hz, 1H), 4.84 (dd, *J* = 5.4, 3.1 Hz, 1H), 4.36 (ddd, *J* = 11.3, 5.5, 3.3 Hz, 1H), 4.15 (ddd, *J* = 11.5, 8.7, 3.8 Hz, 1H), 2.89 (d, *J* = 3.7 Hz, 1H), 2.77 (d, *J* = 3.7 Hz, 1H), 2.52 – 2.41 (m, 1H), 2.19 (s, 3H), 2.18 – 2.14 (m, 1H). **<sup>13</sup>C NMR (126 MHz, Chloroform-*d*)**:  $\delta$  164.40, 139.17, 137.49, 134.76, 132.04, 130.91, 128.58, 128.52, 127.94, 127.77, 127.46, 124.34, 95.70, 77.31, 77.05, 76.80, 69.26, 39.10, 36.42, 28.97, 22.32, 21.23. **HRMS (ESI-TOF, [M + H]<sup>+</sup>)**: For C<sub>21</sub>H<sub>20</sub>NO<sub>2</sub>, 318.1494, Found: 318.1496.

**5-(4-fluorophenyl)-4b-phenyl-3,4b,5,5a-tetrahydrocyclopropa[3,4]pyrrolo[1,2-*b*][1,2]oxazin-6(2*H*)-one (75).**

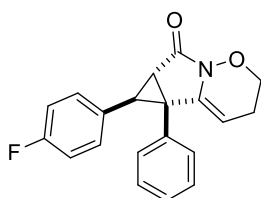

75

White solid (55 mg, 85%). M.p. = 134-136 °C. **<sup>1</sup>H NMR (500 MHz, Chloroform-*d*)**:  $\delta$  7.26 – 7.20 (m, 3H), 7.11 (dd, *J* = 6.4, 3.0 Hz, 2H), 6.81 – 6.67 (m, 4H), 4.82 (dd, *J* = 5.4, 3.0 Hz, 1H), 4.33 (ddd, *J* = 11.4, 5.4, 3.2 Hz, 1H), 4.11 (ddd, *J* = 11.7, 8.8, 3.7 Hz, 1H), 2.83 (d, *J* = 3.6 Hz, 1H), 2.76 (d, *J* = 3.5 Hz, 1H), 2.42 (dddd, *J* = 17.5, 8.8, 5.5, 3.0 Hz,

1H), 2.14 (dq,  $J = 17.4, 3.9$  Hz, 1H).  $^{13}\text{C}$  NMR (126 MHz, Chloroform-*d*):  $\delta$  164.11,  $\delta$  161.59 (d,  $J = 245.9$  Hz), 138.84, 131.67, 130.87, 130.63, 128.96, 128.89, 128.69, 128.12, 115.05, 114.88, 96.01, 77.33, 77.07, 76.82, 69.27, 38.23, 36.33, 29.68, 28.95, 22.28. HRMS (ESI-TOF,  $[\text{M} + \text{H}]^+$ ): For  $\text{C}_{20}\text{H}_{17}\text{FNO}_2$ , 322.1243, Found: 322.1248.

**5-(2-chlorophenyl)-4b-phenyl-3,4b,5,5a-tetrahydrocyclopropa[3,4]pyrrolo[1,2-*b*][1,2]oxazin-6(2*H*)-one (76).**

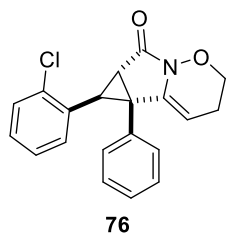

White solid (63 mg, 93%). M.p. = 110-112 °C.  $^1\text{H}$  NMR (500 MHz, Chloroform-*d*):  $\delta$  7.32 (t,  $J = 9.5$  Hz, 1H), 7.22 (m, 5H), 7.04 (t,  $J = 7.7$  Hz, 1H), 6.92 (t,  $J = 7.7$  Hz, 1H), 6.55 (d,  $J = 7.8$  Hz, 1H), 4.99 (t,  $J = 4.2$  Hz, 1H), 4.39 (dt,  $J = 9.4, 4.1$  Hz, 1H), 4.15 (ddd,  $J = 11.6, 9.1, 3.5$  Hz, 1H), 3.17 (d,  $J = 3.8$  Hz, 1H), 3.09 (d,  $J = 3.9$  Hz, 1H), 2.58 – 2.47 (m, 1H), 2.19 (dq,  $J = 17.3, 4.1$  Hz, 1H).  $^{13}\text{C}$  NMR (126 MHz, Chloroform-*d*):  $\delta$  164.06, 138.43, 135.25, 132.32, 131.80, 130.20, 129.33, 128.55, 128.09, 128.03, 127.14, 126.40, 96.46, 77.30, 77.05,

76.80, 69.31, 36.86, 36.12, 26.72, 22.30. HRMS (ESI-TOF,  $[\text{M} + \text{H}]^+$ ): For  $\text{C}_{20}\text{H}_{17}\text{ClNO}_2$ , 338.0948, Found: 338.0949.

**5-(4-chlorophenyl)-4b-phenyl-3,4b,5,5a-tetrahydrocyclopropa[3,4]pyrrolo[1,2-*b*][1,2]oxazin-6(2*H*)-one (77).**

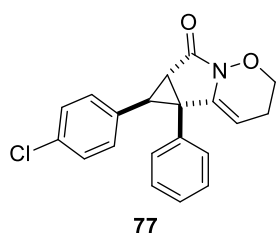

White solid (57 mg, 85%). M.p. = 102-105 °C.  $^1\text{H}$  NMR (500 MHz, Chloroform-*d*):  $\delta$  7.26 – 7.22 (m, 3H), 7.14 – 7.08 (m, 2H), 7.07 – 7.02 (m, 2H), 6.71 – 6.62 (m, 2H), 4.82 (dd,  $J = 5.4, 3.1$  Hz, 1H), 4.33 (dq,  $J = 8.8, 3.3, 2.7$  Hz, 1H), 4.17 – 4.07 (m, 1H), 2.83 (d,  $J = 3.6$  Hz, 1H), 2.74 (d,  $J = 3.6$  Hz, 1H), 2.49 – 2.38 (m, 1H), 2.20 – 2.09 (m, 1H).  $^{13}\text{C}$  NMR (126 MHz, Chloroform-*d*):  $\delta$  163.98, 138.74, 133.54, 132.56, 131.47, 130.84, 128.76, 128.70, 128.15, 96.24, 77.35, 77.09, 76.84, 69.28, 38.28, 36.53, 29.06,

22.28. HRMS (ESI-TOF,  $[\text{M} + \text{H}]^+$ ): For  $\text{C}_{20}\text{H}_{17}\text{ClNO}_2$ , 338.0948, Found: 338.0948.

**5-(4-bromophenyl)-4b-phenyl-3,4b,5,5a-tetrahydrocyclopropa[3,4]pyrrolo[1,2-*b*][1,2]oxazin-6(2*H*)-one (78).**

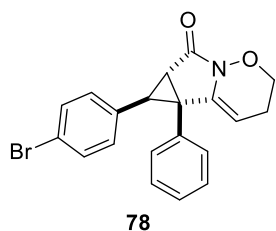

White solid (67 mg, 88%). M.p. = 112-114 °C.  $^1\text{H}$  NMR (500 MHz, Chloroform-*d*):  $\delta$  7.30 – 7.27 (m, 3H), 7.23 (d,  $J = 8.1$  Hz, 2H), 7.15 (dd,  $J = 6.5, 3.0$  Hz, 2H), 6.65 (d,  $J = 8.1$  Hz, 2H), 4.86 (dd,  $J = 5.5, 3.1$  Hz, 1H), 4.36 (ddd,  $J = 11.4, 5.5, 3.3$  Hz, 1H), 4.15 (ddd,  $J = 11.6, 8.8, 3.6$  Hz, 1H), 2.86 (d,  $J = 3.6$  Hz, 1H), 2.76 (d,  $J = 3.5$  Hz, 1H), 2.49 – 2.43 (m, 1H), 2.18 (dd,  $J = 17.5, 4.5$  Hz, 1H).  $^{13}\text{C}$  NMR (126 MHz, Chloroform-*d*):  $\delta$  163.92, 138.76, 134.07, 131.44, 131.08, 130.82, 129.03, 128.77, 128.23, 120.68, 96.21,

69.27, 38.36, 36.52, 29.08, 22.29. HRMS (ESI-TOF,  $[\text{M} + \text{H}]^+$ ): For  $\text{C}_{20}\text{H}_{17}\text{BrNO}_2$ , 382.0443, Found: 382.0443.

**5-(4-nitrophenyl)-4b-phenyl-3,4b,5,5a-tetrahydrocyclopropa[3,4]pyrrolo[1,2-*b*][1,2]oxazin-6(2*H*)-one (79).**

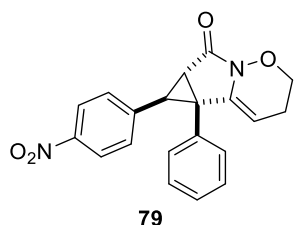

Light yellow solid (60 mg, 86%). M.p. = 112-114 °C.  $^1\text{H}$  NMR (500 MHz, Chloroform-*d*):  $\delta$  7.93 (d,  $J = 8.8$  Hz, 2H), 7.25 (dq,  $J = 5.7, 3.9, 3.2$  Hz, 3H), 7.10 (dd,  $J = 6.7, 2.9$  Hz, 2H), 6.89 (d,  $J = 8.8$  Hz, 2H), 4.87 (dd,  $J = 5.5, 3.1$  Hz, 1H), 4.34

(ddd,  $J = 11.3, 5.5, 3.2$  Hz, 1H), 4.12 (ddd,  $J = 11.5, 8.8, 3.7$  Hz, 1H), 2.96 (d,  $J = 3.6$  Hz, 1H), 2.85 (d,  $J = 3.5$  Hz, 1H), 2.44 (dtd,  $J = 17.6, 5.6, 2.9$  Hz, 1H), 2.16 (dq,  $J = 17.5, 3.8$  Hz, 1H).  $^{13}\text{C}$  NMR (126 MHz, Chloroform- $d$ ):  $\delta$  163.25, 146.54, 142.97, 138.28, 130.74, 128.99, 128.60, 128.09, 123.19, 97.17, 77.31, 77.05, 76.80, 69.30, 38.27, 37.49, 29.75, 22.30. HRMS (ESI-TOF,  $[\text{M} + \text{H}]^+$ ): For  $\text{C}_{20}\text{H}_{17}\text{N}_2\text{O}_4$ , 349.1188, Found: 349.1188.

**4b-phenyl-5-(4-(trifluoromethyl)phenyl)-3,4b,5,5a-tetrahydrocyclopropa[3,4]pyrrolo[1,2-*b*][1,2]oxazin-6(2*H*)-one (80).**

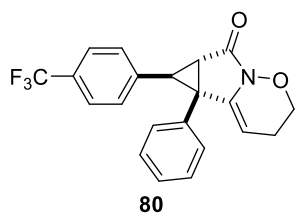

80

White solid (68 mg, 91%). M.p. = 119-121 °C.  $^1\text{H}$  NMR (500 MHz, Chloroform- $d$ ):  $\delta$  7.32 (d,  $J = 8.1$  Hz, 2H), 7.26 – 7.23 (m, 3H), 7.11 (dd,  $J = 6.4, 3.0$  Hz, 2H), 6.84 (d,  $J = 8.0$  Hz, 2H), 4.84 (dd,  $J = 5.3, 3.1$  Hz, 1H), 4.33 (ddd,  $J = 11.4, 5.5, 3.3$  Hz, 1H), 4.11 (ddd,  $J = 11.7, 8.7, 3.8$  Hz, 1H), 2.90 (d,  $J = 3.7$  Hz, 1H), 2.80 (d,  $J = 3.6$  Hz, 1H), 2.43 (dddd,  $J = 17.4, 8.8, 5.3, 3.1$  Hz, 1H), 2.21 – 2.09 (m, 1H).  $^{13}\text{C}$  NMR (126 MHz,

Chloroform- $d$ ):  $\delta$  163.70, 139.24, 138.62, 131.18, 130.80, 128.84, 128.36, 127.70, 124.89, 96.59, 77.30, 77.05, 76.79, 69.28, 38.39, 36.92, 29.36, 22.29. HRMS (ESI-TOF,  $[\text{M} + \text{H}]^+$ ): For  $\text{C}_{21}\text{H}_{17}\text{F}_3\text{NO}_2$ , 372.1211, Found: 372.1207.

**5-phenyl-4b-(*o*-tolyl)-3,4b,5,5a-tetrahydrocyclopropa[3,4]pyrrolo[1,2-*b*][1,2]oxazin-6(2*H*)-one (81).**

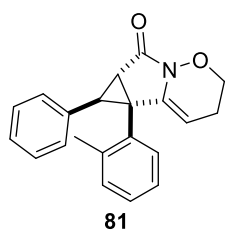

81

White solid (47 mg, 74%). M.p. = 130-132 °C.  $^1\text{H}$  NMR (500 MHz, Chloroform- $d$ ):  $\delta$  7.35 (m, 1H), 7.25 – 6.95 (m, 6H), 6.74 – 6.61 (m, 2H), 4.70 (m, 1H), 4.39 – 4.30 (m, 1H), 4.16 – 4.05 (m, 1H), 2.76 (q,  $J = 5.9, 4.8$  Hz, 2H), 2.43 (d,  $J = 8.6$  Hz, 1H), 2.34 (s, 1H), 2.14 (m, 1H), 2.00 (s, 2H).  $^{13}\text{C}$  NMR (126 MHz, Chloroform- $d$ ):  $\delta$  164.47, 164.01, 139.31, 138.83, 138.16, 135.52, 135.35, 132.91, 131.03, 130.84, 130.58, 128.41, 127.96, 127.73, 127.65,

126.99, 126.71, 126.43, 125.18, 96.13, 96.02, 77.33, 77.07, 76.82, 69.27, 40.10, 38.57, 36.08, 35.02, 31.37, 30.03, 22.34, 19.77, 19.43. HRMS (ESI-TOF,  $[\text{M} + \text{H}]^+$ ): For  $\text{C}_{21}\text{H}_{20}\text{NO}_2$ , 318.1494, Found: 318.1494.

**5-phenyl-4b-(*m*-tolyl)-3,4b,5,5a-tetrahydrocyclopropa[3,4]pyrrolo[1,2-*b*][1,2]oxazin-6(2*H*)-one (82).**

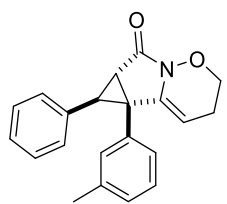

82

White solid (51 mg, 81%). M.p. = 161-163 °C.  $^1\text{H}$  NMR (500 MHz, Chloroform- $d$ ):  $\delta$  7.11 – 6.97 (m, 5H), 6.94 (s, 1H), 6.87 (d,  $J = 7.6$  Hz, 1H), 6.80 – 6.64 (m, 2H), 4.79 (t,  $J = 4.2$  Hz, 1H), 4.32 (dt,  $J = 9.6, 4.5$  Hz, 1H), 4.16 – 4.05 (m, 1H), 2.83 (d,  $J = 3.7$  Hz, 1H), 2.74 (d,  $J = 3.7$  Hz, 1H), 2.40 (q,  $J = 7.7, 7.0$  Hz, 1H), 2.23 (s, 3H), 2.18 – 2.05 (m, 1H).  $^{13}\text{C}$  NMR (126 MHz, Chloroform- $d$ ):  $\delta$  164.34, 139.18, 138.25, 134.91, 131.73, 131.44, 128.71, 128.31, 127.96, 127.86, 127.45, 126.61, 95.67, 77.23, 76.98, 76.73, 69.23, 39.02, 36.38, 28.94, 22.27,

21.25. HRMS (ESI-TOF,  $[\text{M} + \text{H}]^+$ ): For  $\text{C}_{21}\text{H}_{20}\text{NO}_2$ , 318.1494, Found: 318.1494.

**5-phenyl-4b-(*p*-tolyl)-3,4b,5,5a-tetrahydrocyclopropa[3,4]pyrrolo[1,2-*b*][1,2]oxazin-6(2*H*)-one (83).**

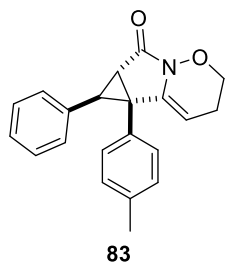

White solid (39 mg, 61%). M.p. = 164-166 °C. <sup>1</sup>H NMR (500 MHz, Chloroform-*d*): δ 7.11 – 7.05 (m, 3H), 7.01 (q, *J* = 8.0 Hz, 4H), 6.76 (dd, *J* = 6.7, 3.0 Hz, 2H), 4.79 (dd, *J* = 5.3, 3.1 Hz, 1H), 4.32 (ddd, *J* = 11.1, 5.4, 3.3 Hz, 1H), 4.11 (ddd, *J* = 11.6, 8.7, 3.7 Hz, 1H), 2.84 (d, *J* = 3.7 Hz, 1H), 2.75 (d, *J* = 3.7 Hz, 1H), 2.41 (ddt, *J* = 14.2, 5.4, 3.2 Hz, 1H), 2.27 (s, 3H), 2.13 (dq, *J* = 17.5, 4.1 Hz, 1H). <sup>13</sup>C NMR (126 MHz, Chloroform-*d*): δ 170.91, 140.09, 138.21, 129.60, 129.53, 129.48, 129.03, 128.77, 128.36, 125.90, 125.29, 122.00, 113.92, 113.75, 108.47, 77.29, 77.03, 76.78, 71.35, 65.92, 57.95, 36.96, 36.20, 25.50. HRMS (ESI-TOF, [M + H]<sup>+</sup>): For C<sub>21</sub>H<sub>20</sub>NO<sub>2</sub>, 318.1494, Found: 318.1495.

**4b-(4-fluorophenyl)-5-phenyl-3,4b,5,5a-tetrahydrocyclopropa[3,4]pyrrolo[1,2-*b*][1,2]oxazin-6(2H)-one (84).**

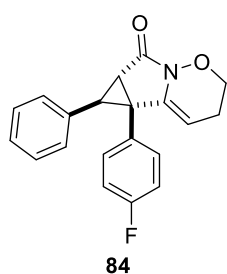

White solid (50 mg, 78%). M.p. = 158-160 °C. <sup>1</sup>H NMR (500 MHz, Chloroform-*d*): δ 7.13 – 7.04 (m, 5H), 6.90 (t, *J* = 8.6 Hz, 2H), 6.74 (dd, *J* = 6.7, 3.0 Hz, 2H), 4.76 (dd, *J* = 5.4, 3.2 Hz, 1H), 4.33 (ddd, *J* = 11.3, 5.4, 3.4 Hz, 1H), 4.11 (ddd, *J* = 11.7, 8.7, 3.8 Hz, 1H), 2.86 (d, *J* = 3.7 Hz, 1H), 2.76 (d, *J* = 3.7 Hz, 1H), 2.47 – 2.37 (m, 1H), 2.15 (dq, *J* = 17.4, 4.0 Hz, 1H). <sup>13</sup>C NMR (126 MHz, Chloroform-*d*): δ 164.12, 163.25, 161.28, 139.05, 134.58, 132.67, 132.60, 128.08, 127.83, 127.46, 126.86, 115.73, 115.56, 95.88, 77.30, 77.05, 76.79, 69.26, 39.04, 35.73, 29.09, 22.30. HRMS (ESI-TOF, [M + H]<sup>+</sup>): For C<sub>20</sub>H<sub>17</sub>FNO<sub>2</sub>, 322.1243, Found: 322.1240.

**4b-(4-bromophenyl)-5-phenyl-3,4b,5,5a-tetrahydrocyclopropa[3,4]pyrrolo[1,2-*b*][1,2]oxazin-6(2H)-one (85).**

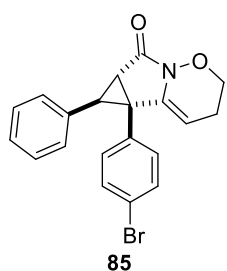

White solid (62 mg, 82%). M.p. = 163-165 °C. <sup>1</sup>H NMR (400 MHz, Chloroform-*d*): δ 7.38 – 7.32 (m, 2H), 7.15 – 7.08 (m, 3H), 7.01 – 6.96 (m, 2H), 6.76 (dt, *J* = 6.2, 1.9 Hz, 2H), 4.76 (dd, *J* = 5.3, 3.1 Hz, 1H), 4.33 (ddd, *J* = 11.2, 5.4, 3.3 Hz, 1H), 4.16 – 4.08 (m, 1H), 2.86 (d, *J* = 3.7 Hz, 1H), 2.78 (d, *J* = 3.7 Hz, 1H), 2.17 (s, 1H). <sup>13</sup>C NMR (126 MHz, Chloroform-*d*): δ 171.47, 141.23, 130.94, 129.43, 124.78, 122.77, 122.22, 121.55, 109.12, 108.47, 107.58, 77.73, 77.28, 77.03, 76.78, 59.31, 56.78, 47.09, 37.38, 36.12, 33.46, 26.64, 9.49. HRMS (ESI-TOF, [M + Na]<sup>+</sup>): For C<sub>20</sub>H<sub>16</sub>BrNNO<sub>2</sub>, 404.0262, Found: 404.0262.

**4b-([1,1'-biphenyl]-4-yl)-5-phenyl-3,4b,5,5a-tetrahydrocyclopropa[3,4]pyrrolo[1,2-*b*][1,2]oxazin-6(2H)-one (86).**

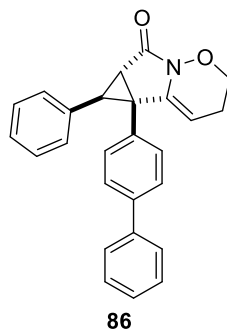

White solid (52 mg, 69%). M.p. = 168-170 °C. <sup>1</sup>H NMR (500 MHz, Chloroform-*d*): δ 7.52 (d, *J* = 7.4 Hz, 2H), 7.46 (d, *J* = 7.9 Hz, 2H), 7.40 (d, *J* = 7.7 Hz, 2H), 7.32 (t, *J* = 7.2 Hz, 1H), 7.18 (d, *J* = 7.9 Hz, 2H), 7.08 (dt, *J* = 6.3, 3.1 Hz, 3H), 6.83 – 6.76 (m, 2H), 4.85 (dd, *J* = 5.4, 3.1 Hz, 1H), 4.34 (ddd, *J* = 11.3, 5.4, 3.4 Hz, 1H), 4.13 (ddd, *J* = 11.5, 8.6, 3.7 Hz, 1H), 2.90 (d, *J* = 3.7 Hz, 1H), 2.80 (d, *J* = 3.6 Hz, 1H), 2.43 (dtd, *J* = 17.3, 5.5, 2.7 Hz, 1H), 2.16 (dq, *J* = 17.3, 4.0 Hz, 1H). <sup>13</sup>C NMR (126 MHz, Chloroform-*d*): δ 164.32, 140.72, 140.24, 139.16, 134.83, 131.32, 130.95, 128.79, 128.04, 127.54, 127.21, 126.97, 126.77,

95.90, 77.30, 77.05, 76.79, 69.30, 39.15, 36.21, 29.09, 22.35. **HRMS (ESI-TOF, [M + H]<sup>+</sup>):** For C<sub>26</sub>H<sub>22</sub>NO<sub>2</sub>, 380.1651, Found: 380.1651.

**5-phenyl-4b-(4-(trifluoromethyl)phenyl)-3,4b,5,5a-tetrahydrocyclopropa[3,4]pyrrolo[1,2-b][1,2]oxazin-6(2H)-one (87).**

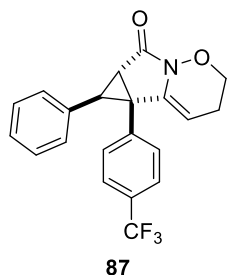

87

White solid (69 mg, 93%). M.p. = 168-170 °C. **<sup>1</sup>H NMR (500 MHz, Chloroform-*d*):**  $\delta$  7.48 (d, *J* = 7.9 Hz, 2H), 7.25 (t, *J* = 6.9 Hz, 2H), 7.14 – 7.03 (m, 3H), 6.75 (dd, *J* = 6.4, 3.1 Hz, 2H), 4.76 (dd, *J* = 5.4, 3.1 Hz, 1H), 4.34 (ddd, *J* = 11.3, 5.6, 3.4 Hz, 1H), 4.12 (ddd, *J* = 11.7, 8.7, 3.7 Hz, 1H), 2.92 (d, *J* = 3.7 Hz, 1H), 2.83 (d, *J* = 3.7 Hz, 1H), 2.43 (dddd, *J* = 17.4, 8.7, 5.5, 3.1 Hz, 1H), 2.15 (dq, *J* = 17.4, 3.8 Hz, 1H). **<sup>13</sup>C NMR (126 MHz, Chloroform-*d*):**  $\delta$  163.85, 138.45, 136.13, 134.17, 131.39, 128.23, 127.39, 127.09, 125.56, 100.00, 96.26, 77.29, 77.04, 76.78, 69.27, 38.89, 36.03, 28.82, 22.28. **HRMS (ESI-TOF, [M + H]<sup>+</sup>):** For

C<sub>21</sub>H<sub>17</sub>F<sub>3</sub>NO<sub>2</sub>, 372.1211, Found: 372.1207.

**4b-(3,5-dimethylphenyl)-5-phenyl-3,4b,5,5a-tetrahydrocyclopropa[3,4]pyrrolo[1,2-b][1,2]oxazin-6(2H)-one (88).**

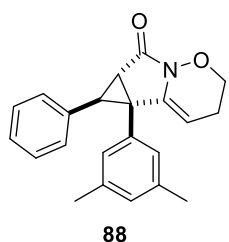

88

White solid (43 mg, 65%). M.p. = 154-156 °C. **<sup>1</sup>H NMR (500 MHz, Chloroform-*d*):**  $\delta$  7.07 (m, *J* = 5.5 Hz, 3H), 6.84 (s, 1H), 6.76 (dd, *J* = 6.1, 2.7 Hz, 2H), 6.72 (s, 2H), 4.82 (dd, *J* = 5.4, 3.1 Hz, 1H), 4.32 (dd, *J* = 10.2, 5.1 Hz, 1H), 4.11 (ddd, *J* = 11.7, 8.9, 3.7 Hz, 1H), 2.81 (d, *J* = 3.7 Hz, 1H), 2.72 (d, *J* = 3.6 Hz, 1H), 2.18 (s, 6H), 2.16 – 2.10 (m, 1H). **<sup>13</sup>C NMR (126 MHz, Chloroform-*d*):**  $\delta$  164.44, 139.37, 138.01, 135.07, 131.67, 129.63, 128.62, 127.85, 127.52, 126.60, 95.58, 77.28, 77.03, 76.77, 69.25, 39.12, 36.37, 29.02, 22.33, 21.13.

**HRMS (ESI-TOF, [M + H]<sup>+</sup>):** For C<sub>22</sub>H<sub>22</sub>NO<sub>2</sub>, 332.1651, Found: 332.1647.

**4b-(3,5-bis(trifluoromethyl)phenyl)-5-phenyl-3,4b,5,5a-tetrahydrocyclopropa[3,4]pyrrolo[1,2-b][1,2]oxazin-6(2H)-one (89).**

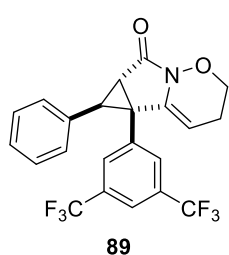

89

White solid (81 mg, 91%). M.p. = 147-149 °C. **<sup>1</sup>H NMR (500 MHz, Chloroform-*d*):**  $\delta$  7.76 (s, 1H), 7.56 (s, 2H), 7.17 (p, *J* = 3.7 Hz, 3H), 6.80 (dt, *J* = 6.5, 3.8 Hz, 2H), 4.77 (dd, *J* = 5.4, 3.2 Hz, 1H), 4.41 (ddd, *J* = 11.3, 5.5, 3.3 Hz, 1H), 4.20 (ddd, *J* = 11.6, 8.6, 3.8 Hz, 1H), 3.05 (d, *J* = 3.8 Hz, 1H), 2.96 (d, *J* = 3.8 Hz, 1H), 2.50 (dddd, *J* = 17.5, 8.7, 5.5, 3.2 Hz, 1H), 2.23 (dq, *J* = 17.5, 4.0 Hz, 1H). **<sup>13</sup>C NMR (126 MHz, Chloroform-*d*):**  $\delta$  163.27, 137.93, 135.00, 133.32,  $\delta$  131.89 (d, *J*<sub>C,F</sub> = 33.6 Hz), 131.33, 131.30, 128.46, 127.49, 127.30, 126.07, 123.90,

121.89 (q, *J*<sub>C,F</sub> = 4.0 Hz). 121.73, 119.56, 96.64, 77.27, 77.01, 76.76, 69.25, 38.70, 35.37, 28.56, 22.25. **HRMS (ESI-TOF, [M + H]<sup>+</sup>):** For C<sub>22</sub>H<sub>16</sub>F<sub>6</sub>NO<sub>2</sub>, 440.1085, Found: 440.1081.

**5-phenyl-4b-(thiophen-2-yl)-3,4b,5,5a-tetrahydrocyclopropa[3,4]pyrrolo[1,2-b][1,2]oxazin-6(2H)-one (90).**

Yellow solid (53 mg, 86%). M.p. = 158-160 °C. **<sup>1</sup>H NMR (500 MHz, Chloroform-*d*):**  $\delta$  7.20 –

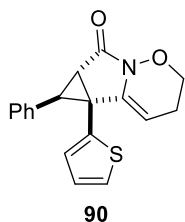

90

7.15 (m, 4H), 6.93 (dd,  $J = 6.6, 3.0$  Hz, 2H), 6.87 (dd,  $J = 5.2, 3.5$  Hz, 1H), 6.76 (d,  $J = 3.5$  Hz, 1H), 5.06 (dd,  $J = 5.4, 3.2$  Hz, 1H), 4.42 – 4.30 (m, 1H), 4.16 (ddd,  $J = 11.5, 8.6, 3.7$  Hz, 1H), 3.00 (d,  $J = 4.1$  Hz, 1H), 2.85 (d,  $J = 4.0$  Hz, 1H), 2.49 (dddd,  $J = 17.4, 8.7, 5.5, 3.2$  Hz, 1H), 2.30 – 2.18 (m, 1H).  $^{13}\text{C}$  NMR (126 MHz, Chloroform-*d*):  $\delta$  163.64, 138.30, 134.46, 134.12, 129.19, 128.87, 128.06, 127.61, 127.14, 126.78, 126.36, 96.37, 77.36, 77.11, 76.85, 69.27, 40.29, 30.92, 30.35, 22.32. HRMS (ESI-TOF,  $[\text{M} + \text{H}]^+$ ): For  $\text{C}_{18}\text{H}_{16}\text{NO}_2\text{S}$ , 310.0902, Found: 310.0904.

**5-bromo-4b-(4-bromophenyl)-3,4b,5,5a-tetrahydrocyclopropa[3,4]pyrrolo[1,2-*b*][1,2]oxazin-6(2*H*)-one (91).**

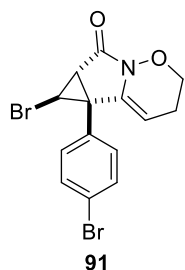

White solid (64 mg, 83%). M.p. = 148-150 °C.  $^1\text{H}$  NMR (500 MHz, Chloroform-*d*):  $\delta$  7.58 (d,  $J = 8.1$  Hz, 2H), 7.33 – 7.19 (m, 2H), 4.90 (ddd,  $J = 13.4, 5.3, 3.4$  Hz, 1H), 4.33 – 4.21 (m, 1H), 4.08 (ddd,  $J = 11.6, 8.1, 3.9$  Hz, 1H), 3.52 (m, 1H), 2.63 (m, 1H), 2.37 (dddd,  $J = 17.1, 8.4, 5.2, 3.5$  Hz, 1H), 2.16 (dq,  $J = 17.4, 4.3$  Hz, 1H).  $^{13}\text{C}$  NMR (126 MHz, Chloroform-*d*):  $\delta$  160.95, 135.18, 131.62, 130.76, 122.59, 97.02, 76.82, 76.56, 76.31, 68.64, 33.14, 30.55, 29.16, 21.77. HRMS (ESI-TOF,  $[\text{M} + \text{Na}]^+$ ): For  $\text{C}_{14}\text{H}_{12}\text{Br}_2\text{NO}_2$ , 405.9054, Found: 405.9045.

**5-phenyl-4b-vinyl-3,4b,5,5a-tetrahydrocyclopropa[3,4]pyrrolo[1,2-*b*][1,2]oxazin-6(2*H*)-one (92).**

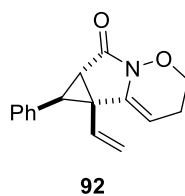

White solid (29 mg, 58%). M.p. = 176-178 °C.  $^1\text{H}$  NMR (500 MHz, DMSO-*d*<sub>6</sub>):  $\delta$  7.35 – 7.18 (m, 5H), 5.56 (dd,  $J = 17.3, 10.8$  Hz, 1H), 5.28 (dd,  $J = 17.4, 1.6$  Hz, 1H), 5.22 – 5.12 (m, 2H), 4.30 (dt,  $J = 11.1, 4.6$  Hz, 1H), 4.09 (ddd,  $J = 11.6, 7.9, 4.2$  Hz, 1H), 3.11 (d,  $J = 4.2$  Hz, 1H), 2.82 (d,  $J = 4.2$  Hz, 1H), 2.39 – 2.22 (m, 2H).  $^{13}\text{C}$  NMR (126 MHz, DMSO-*d*<sub>6</sub>):  $\delta$  162.82, 136.31, 134.20, 128.51, 128.11, 126.92, 119.26, 96.05, 68.80, 40.00, 39.84, 39.67, 39.50, 39.34, 39.17, 39.00, 32.52, 26.52, 21.87. HRMS (ESI-TOF,  $[\text{M} + \text{H}]^+$ ): For  $\text{C}_{16}\text{H}_{15}\text{NO}_2$ , 254.1181, Found: 254.1185.

**(*E*)-5-phenyl-4b-styryl-3,4b,5,5a-tetrahydrocyclopropa[3,4]pyrrolo[1,2-*b*][1,2]oxazin-6(2*H*)-one (93).**

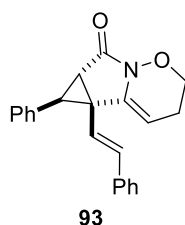

White solid (42 mg, 64%). M.p. = 132-134 °C.  $^1\text{H}$  NMR (500 MHz, Chloroform-*d*):  $\delta$  7.34 (dd,  $J = 8.1, 6.6$  Hz, 2H), 7.30 – 7.27 (m, 1H), 7.26 – 7.21 (m, 2H), 7.20 – 7.13 (m, 5H), 6.62 (d,  $J = 16.1$  Hz, 1H), 5.82 (d,  $J = 16.1$  Hz, 1H), 5.18 (dd,  $J = 5.2, 3.3$  Hz, 1H), 4.37 (ddd,  $J = 11.1, 5.4, 3.6$  Hz, 1H), 4.24 (ddd,  $J = 11.5, 8.4, 3.9$  Hz, 1H), 2.80 (d,  $J = 4.1$  Hz, 1H), 2.69 (d,  $J = 4.1$  Hz, 1H), 2.51 (dddd,  $J = 17.2, 8.6, 5.3, 3.3$  Hz, 1H), 2.37 (dq,  $J = 17.3, 4.1$  Hz, 1H).  $^{13}\text{C}$  NMR (126 MHz, Chloroform-*d*):  $\delta$  163.78, 137.36, 136.44, 134.82, 133.88, 130.91, 128.84, 128.55, 127.85, 127.46, 126.04, 120.47, 96.77, 77.28, 77.03, 76.78, 69.30, 65.57, 40.28, 29.69, 29.29, 22.48. HRMS (ESI-TOF,  $[\text{M} + \text{H}]^+$ ): For  $\text{C}_{22}\text{H}_{20}\text{NO}_2$ , 330.1488, Found: 330.1483.

**Methyl 4b-(4-bromophenyl)-6-oxo-2,3,4b,5,5a,6-hexahydrocyclopropa[3,4]pyrrolo[1,2-*b*][1,2]oxazine-5-carboxylate (94).**

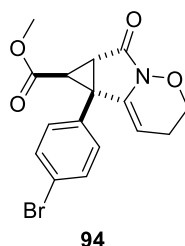

White solid (54 mg, 74%). M.p. = 150-152 °C.  $^1\text{H}$  NMR (500 MHz, Chloroform-*d*):  $\delta$  7.50 (d,  $J = 8.3$  Hz, 2H), 7.17 (d,  $J = 8.3$  Hz, 2H), 4.87 (dd,  $J = 5.2, 3.2$  Hz, 1H), 4.29 (ddd,  $J = 11.3, 5.5, 3.4$  Hz, 1H), 4.08 (ddd,  $J = 11.7, 8.7, 3.8$  Hz, 1H), 3.51 (s, 3H), 3.02 (d,  $J = 3.2$  Hz, 1H),

2.46 (d,  $J = 3.2$  Hz, 1H), 2.44 – 2.37 (m, 1H), 2.16 (dd,  $J = 17.5, 5.1$  Hz, 1H).  $^{13}\text{C}$  NMR (126 MHz, Chloroform-*d*):  $\delta$  167.62, 162.00, 136.77, 132.10, 131.33, 130.75, 122.90, 98.90, 77.27, 77.01, 76.76, 69.19, 52.41, 35.12, 34.71, 27.80, 22.33. HRMS (ESI-TOF,  $[\text{M} + \text{H}]^+$ ): For  $\text{C}_{16}\text{H}_{15}\text{BrNO}_4$ , 364.0184, Found: 364.0182.

**6c-phenyl-6b,6c,8,9-tetrahydro-1H,12H-chromeno[3'',4'':2',3']cyclopropa[1',2':3,4]pyrrolo[1,2-*b*][1,2]oxazine-1,12-dione (95).z**

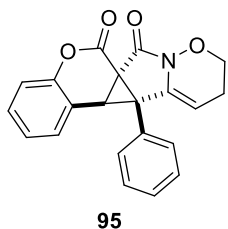

White solid (68.33 mg, 99%). M.p. = 156-158 °C.  $^1\text{H}$  NMR (500 MHz, Chloroform-*d*):  $\delta$  7.46 – 7.41 (m, 1H), 7.22 – 7.12 (m, 5H), 7.08 – 7.04 (m, 2H), 6.72 – 6.64 (m, 1H), 4.83 (dd,  $J = 5.6, 3.0$  Hz, 1H), 4.39 (ddd,  $J = 11.4, 5.7, 2.8$  Hz, 1H), 4.18 (ddd,  $J = 11.3, 9.2, 3.7$  Hz, 1H), 3.33 (s, 1H), 2.46 (dddd,  $J = 17.8, 9.0, 5.7, 3.0$  Hz, 1H), 2.19 (ddt,  $J = 17.6, 5.9, 3.3$  Hz, 1H).  $^{13}\text{C}$  NMR (126 MHz, Chloroform-*d*):  $\delta$  159.12, 158.46, 149.38, 135.90, 130.30, 129.47, 128.97, 128.90, 128.24, 124.89, 117.09, 116.26, 99.20, 77.30, 77.04, 76.79, 69.39, 38.37, 35.41, 22.39. HRMS (ESI-TOF,  $[\text{M} + \text{H}]^+$ ): For  $\text{C}_{21}\text{H}_{18}\text{NO}_4$ , 346.1079, Found: 346.1077.

**(3*R*,4*S*,5*S*,8*S*,9*S*,10*S*,11*R*,13*R*,14*S*,16*S*)-3,11-dihydroxy-4,8,10,14-tetramethyl-5*a*'-(4-methylpent-3-en-1-yl)-6'-oxo-4*b*'-phenyl-1,2,3,3',4,4*b*',5,5*a*',6,6',7,8,9,10,11,12,13,14,15,16-icosahydro-2'*H*-spiro[cyclopenta[*a*]phenanthrene-17,5'-cyclopropa[3,4]pyrrolo[1,2-*b*][1,2]oxazin]-16-yl acetate(96)**

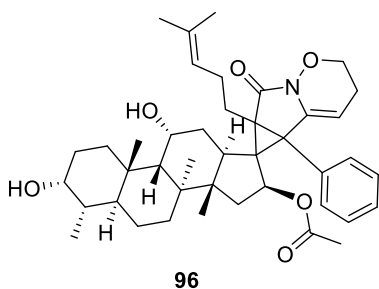

White solid (56 mg, 42%). M.p. = 142-144 °C.  $^1\text{H}$  NMR (500 MHz, Chloroform-*d*):  $\delta$  7.40 – 7.35 (m, 2H), 7.30 – 7.26 (m, 3H), 6.18 (dd,  $J = 8.2, 24.8$  Hz, 1H), 4.35 – 4.29 (m, 1H), 4.26 – 4.09 (m, 1H), 3.95 (tt,  $J = 5.1, 5.1, 9.3, 9.3$  Hz, 1H), 3.80 – 3.71 (m, 2H), 3.05 (d,  $J = 11.9$  Hz, 1H), 2.53 (tq,  $J = 6.6, 6.6, 6.8, 13.2, 13.2$  Hz, 2H), 2.41 – 2.30 (m, 1H), 2.21 – 1.93 (m, 12H), 1.89 – 1.84 (m, 2H), 1.76 – 1.31 (m, 16H), 1.13 (ddt,  $J = 6.3, 6.3, 18.4, 28.3$  Hz, 3H), 0.96 (d,  $J = 6.3$  Hz, 3H), 0.94 – 0.86 (m, 6H).  $^{13}\text{C}$  NMR (126 MHz, Chloroform-*d*):  $\delta$  170.33, 170.25, 164.91, 163.56, 152.13, 149.25, 142.23, 131.58, 131.52, 131.49, 128.25, 128.20, 128.17, 127.72, 127.60, 127.15, 126.95, 123.87, 123.66, 113.28, 89.30, 88.86, 84.47, 81.57, 81.05, 79.70, 77.25, 77.00, 76.74, 74.33, 73.48, 71.96, 71.36, 70.27, 68.50, 68.34, 65.02, 64.32, 60.66, 60.38, 49.21, 49.12, 48.53, 48.41, 45.78, 44.65, 39.44, 39.33, 38.95, 37.12, 37.06, 36.36, 36.27, 36.25, 36.19, 36.08, 35.74, 32.56, 32.40, 30.37, 30.30, 29.95, 29.93, 27.36, 27.16, 26.82, 25.17, 24.43, 24.33, 24.32, 24.07, 22.75, 22.56, 22.30, 21.10, 21.06, 20.78, 20.70, 20.68, 20.36, 18.47, 17.74, 16.12, 16.07, 15.90, 15.88. HRMS (ESI-TOF,  $[\text{M} + \text{H}]^+$ ): For  $\text{C}_{42}\text{H}_{58}\text{NO}_6$ , 672.4264, Found: 672.4276.

**3-(4-chlorophenyl)-2-(5,6-dihydro-4*H*-1,2-oxazin-3-yl)-2-phenylcyclopropane-1-carboxylic acid (97)**

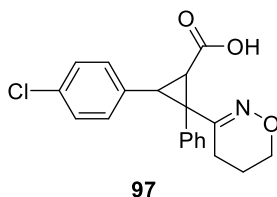

White solid (34 mg, 96%). M.p. = 142-144 °C.  $^1\text{H}$  NMR (500 MHz, Chloroform-*d*):  $\delta$  7.23 (m, 5H), 7.09 (d,  $J = 8.4$  Hz, 2H), 6.84 (d,  $J = 8.5$  Hz, 2H), 3.97 (t,  $J = 5.1$  Hz, 2H), 3.80 (d,  $J = 6.4$  Hz, 1H), 2.91 (d,  $J = 6.4$  Hz, 1H), 2.04 (t,  $J = 6.8$  Hz, 2H), 1.86 (ddd,  $J = 17.5, 13.3, 7.1$  Hz, 2H).  $^{13}\text{C}$  NMR (126 MHz, Chloroform-*d*):  $\delta$  175.95, 157.06,



135.19, 133.73, 132.37, 130.05, 129.31, 128.61, 128.02, 127.88, 77.31, 77.05, 76.80, 65.83, 48.28, 34.71, 29.74, 21.93, 19.18. **HRMS (ESI-TOF, [M + H]<sup>+</sup>)**: For C<sub>20</sub>H<sub>19</sub>ClNO<sub>3</sub>, 356.1048, Found: 356.1044.

**5-(4-chlorophenyl)-4b-phenylhexahydrocyclopropa[3,4]pyrrolo[1,2-b][1,2]oxazin-6(2H)-one (98).**

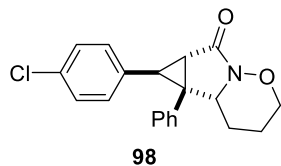

98

White solid (30.5 mg, 90%). M.p. = 110-112 °C. **<sup>1</sup>H NMR (500 MHz, Chloroform-*d*)**: δ 7.22 – 7.19 (m, 3H), 7.03 (dt, *J* = 7.0, 2.3 Hz, 4H), 6.68 (d, *J* = 8.5 Hz, 2H), 4.21 – 4.15 (m, 1H), 3.95 – 3.87 (m, 1H), 3.75 (ddd, *J* = 11.2, 8.2, 6.2 Hz, 1H), 2.67 – 2.59 (m, 2H), 2.20 (dd, *J* = 9.2, 4.8 Hz, 1H), 1.83 (dd, *J* = 6.3, 2.9 Hz, 3H). **<sup>13</sup>C NMR (126 MHz, Chloroform-*d*)**: δ 165.98, 134.31, 133.69, 132.26, 129.89, 128.88, 128.74, 128.07, 127.94, 72.40, 61.65, 39.41, 33.49, 29.02, 25.91, 23.19. **HRMS (ESI-TOF, [M + Na]<sup>+</sup>)**: For C<sub>20</sub>H<sub>19</sub>ClNO<sub>2</sub>, 362.0924, Found: 362.0920.

**4-bromo-5-(4-chlorophenyl)-4a-methoxy-4b-phenylhexahydrocyclopropa[3,4]pyrrolo[1,2-b][1,2]oxazin-6(2H)-one (99).**

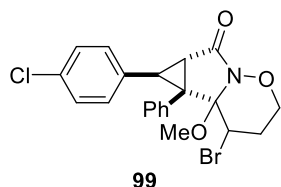

99

White solid (44 mg, 99%). M.p. = 142-144 °C. **<sup>1</sup>H NMR (500 MHz, Chloroform-*d*)**: δ 7.21 (s, 5H), 7.02 – 6.99 (m, 2H), 6.85 (d, *J* = 8.5 Hz, 2H), 4.65 (t, *J* = 3.1 Hz, 1H), 4.37 – 4.28 (m, 1H), 4.19 – 4.12 (m, 1H), 3.59 (d, *J* = 3.5 Hz, 1H), 3.22 (s, 3H), 2.99 (d, *J* = 3.5 Hz, 1H), 2.89 (ddt, *J* = 16.0, 12.4, 4.2 Hz, 1H), 2.04 (dq, *J* = 15.1, 2.0 Hz, 1H). **<sup>13</sup>C NMR (126 MHz, Chloroform-*d*)**: δ 168.51, 156.29, 132.76, 132.65, 130.61, 129.56, 129.32, 128.55, 128.09, 128.01, 90.42, 77.25, 77.00, 76.74, 70.08, 66.85, 50.14, 47.69, 39.10, 37.02, 31.31, 25.08, 21.93. **HRMS (ESI-TOF, [M + H]<sup>+</sup>)**: For C<sub>21</sub>H<sub>20</sub>BrClNO<sub>3</sub>, 448.0315, Found: 448.0314.

**5,6,7-triazido-6-(4-chlorophenyl)-5-phenyl-3,5,6,7-tetrahydropyrido[1,2-*b*][1,2]oxazin-8(2H)-one (100).**

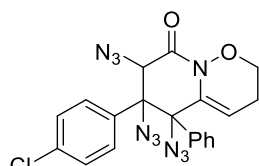

100

Yellow oil (64 mg, 69%). **<sup>1</sup>H NMR (400 MHz, CDCl<sub>3</sub>)** δ 7.53 – 7.35 (m, 3H), 7.34 – 7.29 (m, 4H), 7.28 (s, 1H), 7.26 (s, 1H), 5.57 (d, *J* = 15.3 Hz, 1H), 4.26 (dddd, *J* = 1.9, 5.4, 11.4, 13.0 Hz, 1H), 4.12 (ddt, *J* = 1.9, 1.9, 4.3, 11.5 Hz, 1H), 3.80 (dt, *J* = 3.0, 3.0, 15.2 Hz, 1H), 2.67 – 2.52 (m, 1H), 1.96 (dddt, *J* = 1.8, 1.8, 3.5, 8.6, 15.3 Hz, 1H). **<sup>13</sup>C NMR (101 MHz, CDCl<sub>3</sub>)** δ = 161.56, 161.42, 150.97, 150.51, 134.71, 134.55, 134.31, 134.26, 133.18, 132.96, 130.41, 130.34, 129.09, 129.07, 128.97, 128.90, 128.88, 128.80, 128.50, 128.49, 128.46, 128.32, 80.20, 80.02, 77.37, 77.25, 77.05, 76.73, 67.04, 66.87, 59.03, 58.92, 56.94, 56.63, 24.69, 24.54. **HRMS (ESI-TOF, [M + Na]<sup>+</sup>)**: For C<sub>20</sub>H<sub>15</sub>ClN<sub>10</sub>NaO<sub>2</sub>, 485.0966. Found: 485.0960.

**13. Computational Details**

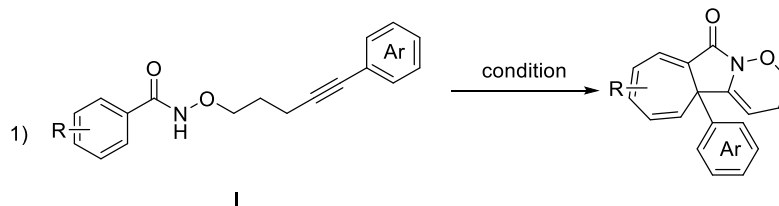

In this work, the M06-2X [1] functional is used for all the geometry optimization calculations. All calculations were

carried out by using the Gaussian 09 program.<sup>[2]</sup> The effective core potentials (ECPs) of Hay and Wadt with a double- $\zeta$  valence basis set (LANL2DZ) were employed for I, <sup>[3-6]</sup> polarization functions were also added for I ( $f = 0.289$ ), <sup>[7,8]</sup> the all-electron 6-31G\* basis set was used in describing all other main-group atoms. <sup>[9-11]</sup> Geometric structures of all species in this work were optimized in solvent phase with the SMD solvent model at  $T = 298.15$  K and 1 atm pressure. The harmonic vibrational frequencies and the number of imaginary frequencies determine the nature of all intermediates (no imaginary frequency) and transition state structures (only one imaginary frequency). The latter were also confirmed to connect appropriate intermediates, reactants, or products by intrinsic reaction coordinate (IRC) calculations. <sup>[12,13]</sup> The Gibbs free energies were refined by 6-311++g\*\* basis set. This methodology have been widely used for many recent theoretical works about hypercoordinate iodine(III) promoted reactions. <sup>[14]</sup> The 3D molecular structures of all the species shown in the Supporting Information were drawn by using the CYLview program. <sup>[15]</sup>

#### Reference:

- [1] (a) M. Walker, A. J. A. Harvey, A. Sen, C. E. H. Dessent, *J. Phys. Chem. A* **2013**, *117*, 12590-12600. (b) Y. Zhao, D. G. Truhlar, *Theor. Chem. Acc.* **2008**, *120*, 215-241.
- [2] Gaussian 09, Revision D. 01, M. J. Frisch, G. W. Trucks, H. B. Schlegel, G. E. Scuseria, M. A. Robb, J. R. Cheeseman, G. Scalmani, V. Barone, B. Mennucci, G. A. Petersson, H. Nakatsuji, M. Caricato, X. Li, H. P. Hratchian, A. F. Izmaylov, J. Bloino, G. Zheng, J. L. Sonnenberg, M. Hada, M. Ehara, K. Toyota, R. Fukuda, J. Hasegawa, M. Ishida, T. Nakajima, Y. Honda, O. Kitao, H. Nakai, T. Vreven, J. A. Montgomery, Jr., J. E. Peralta, F. Ogliaro, M. Bearpark, J. J. Heyd, E. Brothers, K. N. Kudin, V. N. Staroverov, T. Keith, R. Kobayashi, J. Normand, K. Raghavachari, A. Rendell, J. C. Burant, S. S. Iyengar, J. Tomasi, M. Cossi, N. Rega, J. M. Millam, M. Klene, J. E. Knox, J. B. Cross, V. Bakken, C. Adamo, J. Jaramillo, R. Gomperts, R. E. Stratmann, O. Yazyev, A. J. Austin, R. Cammi, C. Pomelli, J. W. Ochterski, R. L. Martin, K. Morokuma, V. G. Zakrzewski, G. A. Voth, P. Salvador, J. J. Dannenberg, S. Dapprich, A. D. Daniels, O. Farkas, J. B. Foresman, J. V. Ortiz, J. Cioslowski, and D. J. Fox, Gaussian, Inc., Wallingford CT, 2013.
- [3] P. J. Hay, W. R. Wadt, *J. Chem. Phys.* **1985**, *82*, 270-283.
- [4] W. R. Wadt, P. J. Hay, *J. Chem. Phys.* **1985**, *82*, 284-298.
- [5] P. J. Hay, W. R. Wadt, *J. Chem. Phys.* **1985**, *82*, 299-310.
- [6] C. E. Check, T. O. Faust, J. M. Bailey, B. J. Wright, T. M. Gilbert, L. S. Sunderlin, *J. Phys. Chem. A* **2001**, *105*, 8111-8116.
- [7] A. W. Ehlers, M. Böhme, S. Dapprich, A. Gobbi, A. Höllwarth, V. Jonas, K. F. Köhler, R. Stegmann, A. Veldkamp, G. Frenking, *Chem. Phys. Lett.* **1993**, *208*, 111-114.
- [8] A. Höllwarth, M. Böhme, S. Dapprich, A. W. Ehlers, A. Gobbi, V. Jonas, K. F. Köhler, R. Stegmann, A. Veldkamp, G. Frenking, *Chem. Phys. Lett.* **1993**, *208*, 237-240.
- [9] P. C. Hariharan, J. A. Pople, *Theor. Chim. Acta.* **1973**, *28*, 213-222.
- [10] M. S. Gordon, *Chem. Phys. Lett.* **1980**, *76*, 163-168.

- [11] R. C. J. Binning, L. A. Curtiss, *J. Comput. Chem.* **1990**, *11*, 1206–1216.
- [12] K. Fukui, *J. Phys. Chem.* **1970**, *74*, 4161–4165.
- [13] K. Fukui, *Acc. Chem. Res.* **1981**, *14*, 363–368.
- [14] (a) S. Shu, L. Li, J. Jiang, Z. Ke, Y. Liu, *J. Org. Chem.* **2019**, *84*, 458–462. (b) J. Guasch, I. Giménez-Nueno, I. Funes-Ardoiz, M. Bernús, M. I. Matheu, F. Maseras, S. Castilljn, Y. Díaz, *Chem. Eur. J.* **2018**, *24*, 4635–4642. (c) A. Sreenithya, R. B. Sunoj, *Org. Lett.* **2014**, *16*, 6224–6227. (d) A. Sreenithya, K. Surya, B. Raghavan, *WIREs Comput Mol Sci.* **2017**, *7*:e1299. (e) I. Funes-Ardoiz, W. M. C. Sameera, R. M. Romero. C. Martínez, J. A. Souto, D. Sampedro, K. Muñiz, F. Maseras, *Chem Eur J.* **2016**, *22*, 7545–7553.
- [15] CYLview, 1.0b; C. Y. Legault, Université de Sherbrooke, **2009** (<http://www.cylview.org>)

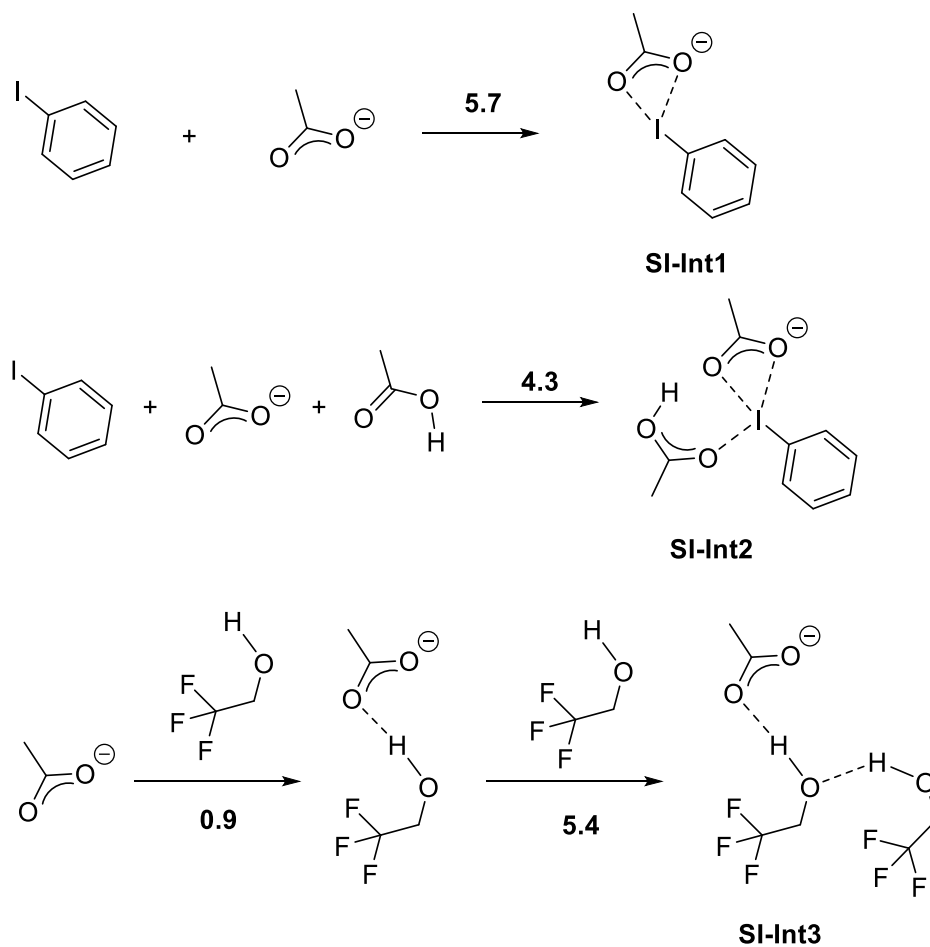

**Figure S1.** Hydrogen bond interactions between solvent and acetate.

We considered the possibility of hydrogen bond interactions between the solvent and the acetate, the calculated results shows that these interactions do not help to stabilize the structure.

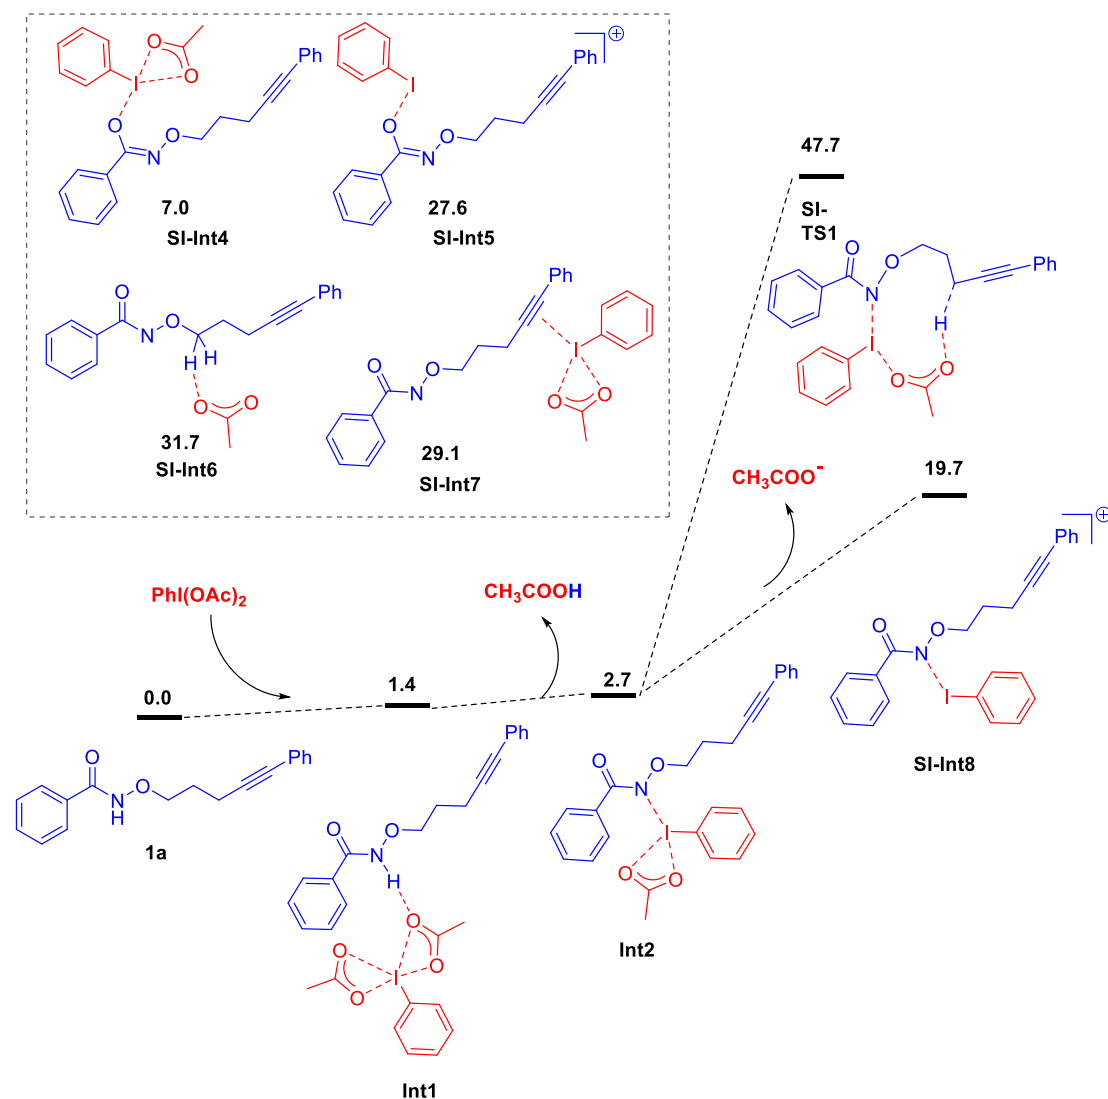

**Figure S2.** The relative free energies (in kcal/mol) of different species by varying the coordination sites.

Intermediate **Int1** could be generated by the coordination of **R1** to  $\text{PhI}(\text{OAc})_2$ , which raising the free energy to 1.4 kcal/mol. Followed by a rapid deprotonation process, a slightly endergonic species **Int2** is formed. All the attempts for the optimization of this deprotonation transition state failed by giving deprotonated structures, which indicate that this process should happens with low barrier. This is quite similar to the steps involved in the previous studies.<sup>[16]</sup> From **Int2**, the C-H bond activation (**SI-TS1**) are studied carefully and all the transition states possess very high energy barriers. More possible transition states of the C-H bond activation with the help of acetate and solvent can be found in Figure S3.

**C-H bond activation TSs**

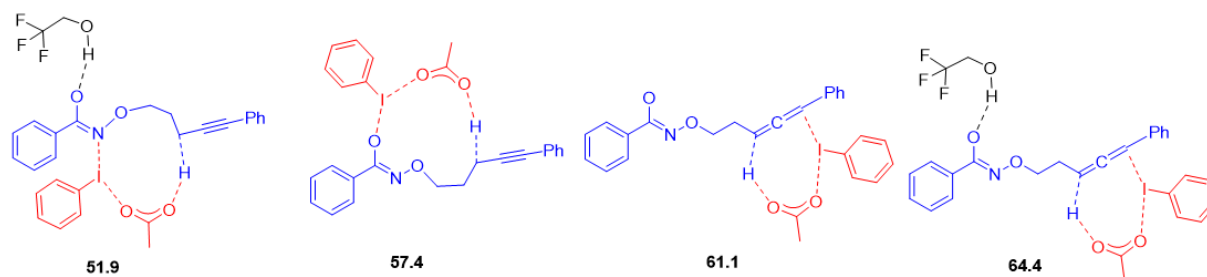

**Figure S3.** The structures and free energies of the other possible transition states.

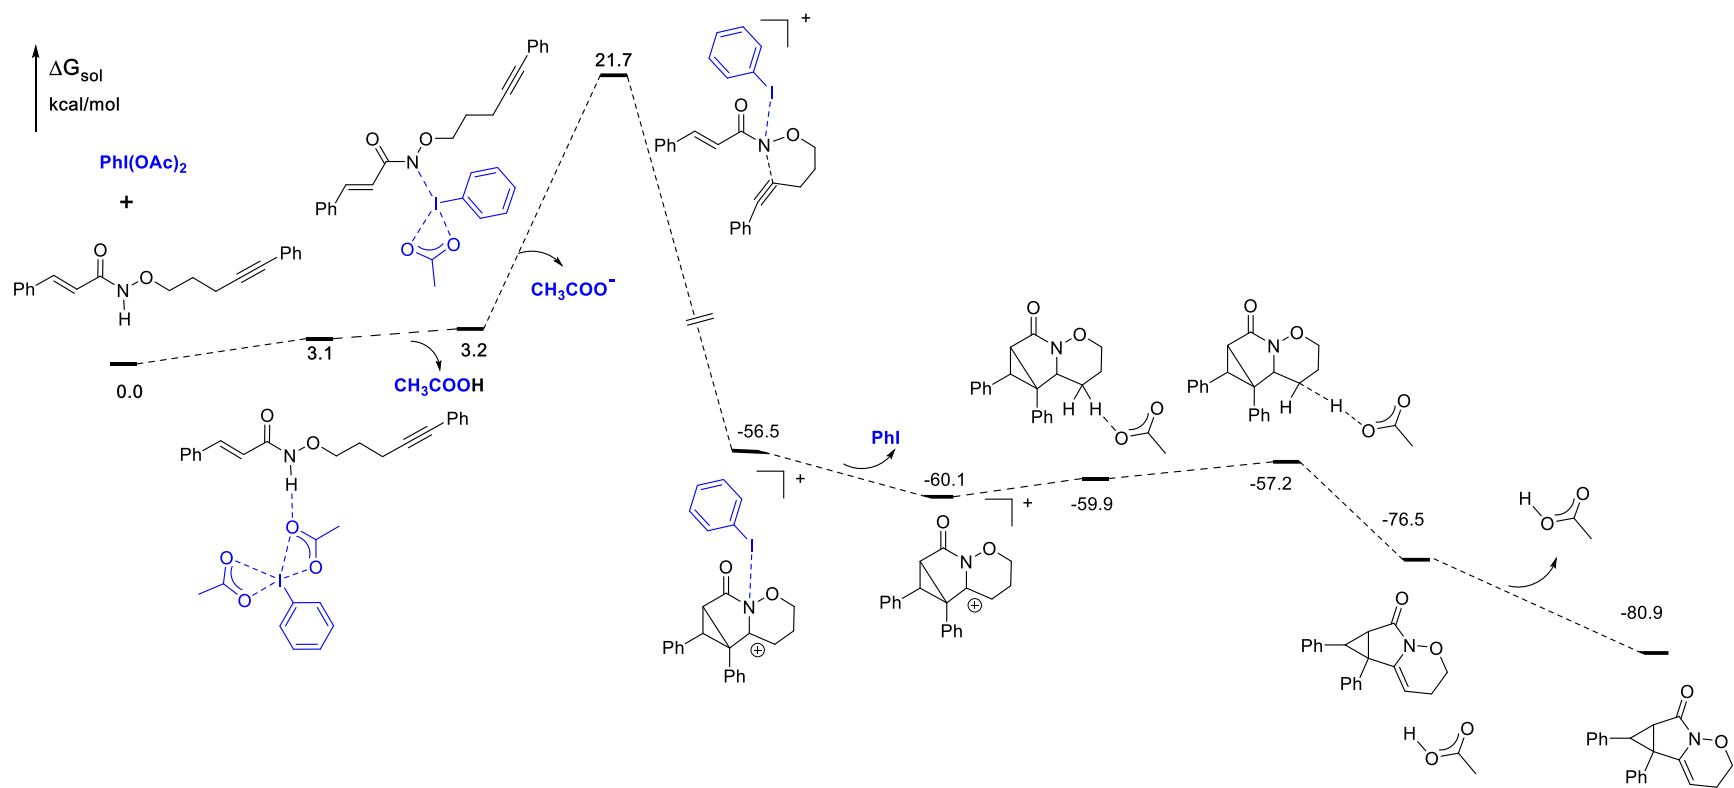

Figure S4. The calculated reaction mechanism for the formation of cyclopropanes.

**Cartesian Coordinates of all the intermediate and transition states**



1

E = -900.876053099 a.u.

|   |             |             |             |
|---|-------------|-------------|-------------|
| C | -3.94002700 | -0.20644500 | 0.63228300  |
| C | -2.60433900 | -0.59814400 | 0.63019200  |
| C | -1.65982900 | 0.15949700  | -0.06907500 |
| C | -2.06076700 | 1.29635400  | -0.77539700 |
| C | -3.39504400 | 1.68740600  | -0.76564600 |
| C | -4.33519700 | 0.93706600  | -0.05999300 |
| H | -4.67380400 | -0.79910200 | 1.16968000  |
| H | -2.31067900 | -1.50359300 | 1.15301400  |
| H | -1.31729600 | 1.86780400  | -1.32264900 |
| H | -3.70174400 | 2.57550400  | -1.30944700 |
| H | -5.37798700 | 1.23996500  | -0.05473000 |
| C | -0.21033400 | -0.19758500 | -0.11604000 |
| O | 0.53953200  | 0.19276300  | -1.00426100 |
| N | 0.22206000  | -1.03289600 | 0.87315600  |
| H | -0.22919900 | -1.05085900 | 1.78283000  |
| O | 1.58717900  | -1.21037800 | 0.96816800  |
| C | 1.98683900  | -2.38801700 | 0.25569800  |
| C | 3.49516400  | -2.46774600 | 0.37303500  |
| H | 1.67356100  | -2.29977000 | -0.79157500 |
| H | 1.50053500  | -3.26432800 | 0.70145500  |
| C | 4.02200200  | -3.71399000 | -0.35111300 |
| H | 3.93944500  | -1.56656400 | -0.06236900 |
| H | 3.77659200  | -2.50357700 | 1.43090600  |
| H | 3.56476400  | -4.61270200 | 0.08028700  |
| H | 3.72262300  | -3.68176300 | -1.40560600 |
| C | 5.47955100  | -3.82949300 | -0.26874100 |
| C | 6.68503900  | -3.90793700 | -0.18991800 |
| C | 8.11475400  | -4.01598200 | -0.10012100 |

|   |             |             |             |
|---|-------------|-------------|-------------|
| C | 8.93424100  | -3.40256600 | -1.05938600 |
| C | 8.70422300  | -4.74082500 | 0.94667400  |
| C | 10.31756400 | -3.51594600 | -0.97116900 |
| H | 8.47760800  | -2.84203200 | -1.86942300 |
| C | 10.08824400 | -4.84949800 | 1.02779000  |
| H | 8.06964100  | -5.21451700 | 1.68957600  |
| C | 10.89759300 | -4.23894800 | 0.07057600  |
| H | 10.94469800 | -3.03890800 | -1.71839700 |
| H | 10.53710800 | -5.41218700 | 1.84086100  |
| H | 11.97797700 | -4.32609100 | 0.13633200  |

**Int1**

**E = -1600.50039198 a.u.**

|   |             |             |             |
|---|-------------|-------------|-------------|
| C | -1.75856100 | 1.71955800  | 0.99559000  |
| C | -0.79451700 | 0.73262900  | 0.80538100  |
| C | -0.14354000 | 0.63106800  | -0.42800900 |
| C | -0.48470000 | 1.48859000  | -1.47606200 |
| C | -1.43945900 | 2.48083200  | -1.27863600 |
| C | -2.07157400 | 2.60017800  | -0.04052900 |
| H | -2.26382700 | 1.80328400  | 1.95350200  |
| H | -0.54342300 | 0.05457800  | 1.61654400  |
| H | 0.02699700  | 1.38743200  | -2.42973100 |
| H | -1.68811300 | 3.16191600  | -2.08684500 |
| H | -2.81561100 | 3.37612200  | 0.11409400  |
| C | 1.01077000  | -0.28835700 | -0.65555700 |
| O | 1.29165700  | -0.76035600 | -1.75282500 |
| N | 1.73699500  | -0.55133800 | 0.46422000  |
| H | 1.72421000  | 0.08096100  | 1.26640400  |
| O | 2.96766500  | -1.14431800 | 0.27019100  |
| C | 2.87239900  | -2.56560300 | 0.42003900  |

|   |             |             |             |
|---|-------------|-------------|-------------|
| C | 4.25905900  | -3.11721700 | 0.15630500  |
| H | 2.14428700  | -2.95718000 | -0.30043700 |
| H | 2.53149600  | -2.80199500 | 1.43574100  |
| C | 4.27025600  | -4.64436500 | 0.30685200  |
| H | 4.57222500  | -2.84044300 | -0.85578500 |
| H | 4.96767200  | -2.66944000 | 0.86100500  |
| H | 3.94703500  | -4.91925600 | 1.31798300  |
| H | 3.54822400  | -5.08943400 | -0.38848500 |
| C | 5.59630900  | -5.21267000 | 0.05477600  |
| C | 6.70207600  | -5.65710500 | -0.15790900 |
| C | 8.01048800  | -6.19872700 | -0.39963500 |
| C | 8.61213200  | -6.06716100 | -1.66036700 |
| C | 8.69926600  | -6.86578100 | 0.62486800  |
| C | 9.87854500  | -6.59507000 | -1.88851600 |
| H | 8.08040200  | -5.55083700 | -2.45367600 |
| C | 9.96485100  | -7.39118900 | 0.38850300  |
| H | 8.23460600  | -6.96846500 | 1.60073000  |
| C | 10.55760800 | -7.25803300 | -0.86681600 |
| H | 10.33638000 | -6.48762000 | -2.86723600 |
| H | 10.48999700 | -7.90617500 | 1.18720900  |
| H | 11.54584300 | -7.67019800 | -1.04748500 |
| C | 0.76714300  | 7.67806200  | 0.38484400  |
| C | 1.36845900  | 6.42160000  | 0.35133500  |
| C | 0.67238300  | 5.34203100  | 0.88442400  |
| C | -0.59091200 | 5.47480500  | 1.45153800  |
| C | -1.17077700 | 6.74156600  | 1.48411300  |
| C | -0.49645600 | 7.83800800  | 0.95048500  |
| H | 1.29480400  | 8.53225100  | -0.02797300 |
| H | 2.35304400  | 6.28979900  | -0.08492900 |
| H | -1.10891600 | 4.61542500  | 1.86496000  |

|   |             |            |             |
|---|-------------|------------|-------------|
| H | -2.15512000 | 6.86497900 | 1.92480300  |
| H | -0.95676000 | 8.82085200 | 0.97723800  |
| I | 1.55763800  | 3.44226600 | 0.81315700  |
| C | 2.45356800  | 2.97046300 | -1.87336800 |
| O | 1.85512400  | 3.94825700 | -1.22650500 |
| O | 2.81249300  | 1.93918100 | -1.31319700 |
| C | 1.11965800  | 2.18408400 | 3.38343600  |
| O | 1.69997300  | 1.27792300 | 2.78468000  |
| O | 0.93307000  | 3.36867100 | 2.86103000  |
| C | 2.63648700  | 3.23672500 | -3.34163500 |
| H | 3.21767700  | 4.15309600 | -3.47748800 |
| H | 3.14416800  | 2.39569300 | -3.81362800 |
| H | 1.65686200  | 3.39121200 | -3.80377400 |
| C | 0.54448800  | 2.01774300 | 4.76268900  |
| H | 0.80066000  | 2.87740900 | 5.38594200  |
| H | -0.54679500 | 1.97527500 | 4.67848400  |
| H | 0.91049000  | 1.09463200 | 5.21238400  |

**Int2**

**E = -1371.48549601 a.u.**

|   |             |             |             |
|---|-------------|-------------|-------------|
| C | -5.19567300 | -1.05949500 | -0.24930200 |
| C | -3.81448200 | -1.09736800 | -0.07853000 |
| C | -3.01051400 | -0.13756800 | -0.69986300 |
| C | -3.59169500 | 0.84877500  | -1.50050300 |
| C | -4.97293900 | 0.89234600  | -1.65729300 |
| C | -5.77518600 | -0.06175400 | -1.03172400 |
| H | -5.81884000 | -1.81225200 | 0.22375900  |
| H | -3.35590700 | -1.88310400 | 0.51560700  |
| H | -2.95316300 | 1.57706000  | -1.99188900 |
| H | -5.42425800 | 1.66645400  | -2.27040400 |

|   |             |             |             |
|---|-------------|-------------|-------------|
| H | -6.85306700 | -0.03203000 | -1.16055700 |
| C | -1.51862900 | -0.16181500 | -0.59426000 |
| O | -0.80633400 | 0.15398500  | -1.54566900 |
| N | -1.02140700 | -0.61329100 | 0.60046000  |
| O | 0.37635300  | -0.59997500 | 0.63844000  |
| C | 0.88434800  | -1.89793100 | 0.31863900  |
| C | 2.38822800  | -1.84218200 | 0.50454400  |
| H | 0.61901900  | -2.14833700 | -0.71652200 |
| H | 0.43396700  | -2.64240800 | 0.98830600  |
| C | 2.98864900  | -3.24722300 | 0.35848500  |
| H | 2.83109800  | -1.16328300 | -0.23126100 |
| H | 2.61364700  | -1.44793800 | 1.50184000  |
| H | 2.55809700  | -3.90712700 | 1.12240900  |
| H | 2.71272500  | -3.66893600 | -0.61583000 |
| C | 4.44721000  | -3.24490400 | 0.48703900  |
| C | 5.65265100  | -3.21628300 | 0.59500300  |
| C | 7.08391800  | -3.18960000 | 0.71420900  |
| C | 7.87969100  | -2.87279600 | -0.39729000 |
| C | 7.69967000  | -3.48002600 | 1.94070000  |
| C | 9.26522600  | -2.84854200 | -0.28014400 |
| H | 7.40282700  | -2.64875700 | -1.34666500 |
| C | 9.08591300  | -3.45351500 | 2.04960100  |
| H | 7.08499700  | -3.72589500 | 2.80120800  |
| C | 9.87161900  | -3.13870100 | 0.94143300  |
| H | 9.87275500  | -2.60173900 | -1.14557000 |
| H | 9.55470300  | -3.67854300 | 3.00289300  |
| H | 10.95363600 | -3.11886500 | 1.03007400  |
| C | 1.26420600  | -2.73825700 | 3.93625400  |
| C | 0.56736000  | -1.57540300 | 3.61056200  |
| C | -0.75890600 | -1.69447300 | 3.20862000  |

|   |             |             |            |
|---|-------------|-------------|------------|
| C | -1.41436100 | -2.91971500 | 3.13575300 |
| C | -0.70189900 | -4.07026300 | 3.46925400 |
| C | 0.63360300  | -3.97926900 | 3.86015000 |
| H | 2.30364300  | -2.67050500 | 4.24295500 |
| H | 1.05451500  | -0.60658800 | 3.65119700 |
| H | -2.45055300 | -2.97963100 | 2.81864500 |
| H | -1.19291500 | -5.03687500 | 3.41638400 |
| H | 1.18550500  | -4.88023000 | 4.10989200 |
| I | -1.75503600 | 0.02047000  | 2.55488300 |
| C | -2.84099500 | 1.29950600  | 4.92799800 |
| O | -2.14594100 | 0.21980200  | 4.67061200 |
| O | -3.24105200 | 2.05280700  | 4.04310400 |
| C | -3.09692700 | 1.53575200  | 6.39310700 |
| H | -2.14109700 | 1.64928900  | 6.91277400 |
| H | -3.70128300 | 2.43319800  | 6.52673400 |
| H | -3.60913800 | 0.67004400  | 6.82183800 |

### Int3

**E = -900.077949 a.u.**

|   |             |             |             |
|---|-------------|-------------|-------------|
| C | -3.45072500 | 0.23126800  | -0.94323600 |
| C | -2.19853800 | 0.41367900  | -0.36580600 |
| C | -1.05006300 | 0.06181500  | -1.08963200 |
| C | -1.14540400 | -0.44559400 | -2.39020500 |
| C | -2.40139000 | -0.66379700 | -2.94006800 |
| C | -3.55130500 | -0.33423600 | -2.21336400 |
| H | -4.34553700 | 0.50452200  | -0.39340400 |
| H | -2.10241100 | 0.82047900  | 0.63722600  |
| H | -0.24214800 | -0.69345000 | -2.93997000 |
| H | -2.49186100 | -1.08857200 | -3.93474400 |
| H | -4.53017300 | -0.50952600 | -2.64984900 |

|   |             |             |             |
|---|-------------|-------------|-------------|
| C | 0.29539400  | 0.22968400  | -0.47102700 |
| O | 1.17941300  | 0.95228300  | -0.87585800 |
| N | 0.44614800  | -0.53771500 | 0.68524200  |
| O | 1.64504900  | -0.41202700 | 1.34768400  |
| C | 2.55323000  | -1.45491800 | 0.92804100  |
| C | 1.99428800  | -2.82826200 | 1.33916700  |
| H | 3.48496300  | -1.20903000 | 1.43768900  |
| H | 2.69754900  | -1.36838000 | -0.15306900 |
| C | 0.54349600  | -2.68949000 | 1.82424400  |
| H | 2.03243500  | -3.51847400 | 0.49285900  |
| H | 2.58341200  | -3.25922300 | 2.15221800  |
| H | 0.04167400  | -3.65526300 | 1.88638000  |
| H | 0.50479400  | -2.20961200 | 2.80758100  |
| C | -0.19459100 | -1.77088200 | 0.86934900  |
| C | -1.27293200 | -2.18580900 | 0.26264300  |
| C | -2.37796600 | -2.83095200 | -0.22216400 |
| C | -3.62626000 | -2.71508300 | 0.46161500  |
| C | -2.29033300 | -3.58842900 | -1.42850100 |
| C | -4.73352100 | -3.36889700 | -0.03281100 |
| H | -3.67420100 | -2.11557200 | 1.36529700  |
| C | -3.41226900 | -4.23357700 | -1.90786000 |
| H | -1.33603000 | -3.64941300 | -1.94254200 |
| C | -4.62096200 | -4.12413900 | -1.20935000 |
| H | -5.68727800 | -3.29917700 | 0.47807800  |
| H | -3.36243800 | -4.81903500 | -2.81895200 |
| H | -5.49945100 | -4.63488400 | -1.59334700 |

**TS1-2**

**E = -1142.91603081 a.u.**

|   |             |             |            |
|---|-------------|-------------|------------|
| C | -2.54463200 | 1.02154700  | 2.22681600 |
| C | -1.88553600 | -0.09405800 | 1.72135100 |

|   |             |             |             |
|---|-------------|-------------|-------------|
| C | -1.35404300 | -0.04481200 | 0.42555800  |
| C | -1.48617700 | 1.11069300  | -0.35713700 |
| C | -2.14206100 | 2.21879600  | 0.15860700  |
| C | -2.67339300 | 2.17198100  | 1.44964700  |
| H | -2.96064400 | 0.98914700  | 3.22887500  |
| H | -1.80527300 | -0.99374300 | 2.32375700  |
| H | -1.08022400 | 1.12161400  | -1.36398500 |
| H | -2.24706500 | 3.11590900  | -0.44310300 |
| C | -0.72127700 | -1.20034600 | -0.21752600 |
| O | -0.33866700 | -1.28559000 | -1.35280300 |
| N | -0.57592300 | -2.40593900 | 0.68816100  |
| O | -0.08511800 | -3.33819500 | 0.00941800  |
| C | 0.08436900  | -4.58083300 | 0.77959300  |
| C | -1.24687000 | -5.29603500 | 0.88376600  |
| H | 0.48477500  | -4.28021500 | 1.75092500  |
| H | 0.82001200  | -5.13685500 | 0.20093800  |
| C | -2.34527300 | -4.46631300 | 1.56837200  |
| H | -1.57852800 | -5.61776300 | -0.10740600 |
| H | -1.05431700 | -6.19279400 | 1.48124900  |
| H | -3.21062100 | -5.10579400 | 1.77040700  |
| H | -1.98949100 | -4.08159600 | 2.53241700  |
| C | -2.79108200 | -3.34538900 | 0.73055200  |
| C | -3.25649200 | -2.51295900 | -0.03187000 |
| C | -3.77155300 | -1.48501500 | -0.87440800 |
| C | -4.63258400 | -0.51131900 | -0.33875400 |
| C | -3.35952200 | -1.40175200 | -2.21537900 |
| C | -5.07211500 | 0.53288600  | -1.14071600 |
| H | -4.93702700 | -0.58054300 | 0.70105400  |
| C | -3.80132400 | -0.34706700 | -3.00558200 |
| H | -2.69136800 | -2.15724400 | -2.61744400 |



|   |             |             |             |
|---|-------------|-------------|-------------|
| C | -4.65292900 | 0.61921600  | -2.47027000 |
| H | -5.73577200 | 1.28663900  | -0.72858800 |
| H | -3.47974900 | -0.27815800 | -4.03994700 |
| H | -4.99206000 | 1.44304800  | -3.09102800 |
| C | -0.99115300 | -2.06637200 | 5.22444300  |
| C | -1.27293200 | -0.80318600 | 5.74350600  |
| C | -0.62218000 | 0.31941000  | 5.23620300  |
| C | 0.29813200  | 0.19188600  | 4.19632000  |
| C | 0.56194900  | -1.07662100 | 3.68533800  |
| C | -0.06566600 | -2.21309400 | 4.19241100  |
| H | -1.48908800 | -2.94563200 | 5.62235200  |
| H | -1.99691900 | -0.69523000 | 6.54506400  |
| H | -0.83527900 | 1.30487100  | 5.63966000  |
| H | 0.78780300  | 1.06823900  | 3.78417600  |
| H | 0.16025400  | -3.19703600 | 3.79341100  |
| I | 1.85509000  | -1.27133100 | 2.04494800  |
| H | -3.19265900 | 3.03741600  | 1.85056200  |

**TS3-4**

**E = -900.077007 a.u.**

|   |             |             |             |
|---|-------------|-------------|-------------|
| C | -3.42959300 | 0.23705400  | -0.91601300 |
| C | -2.17531300 | 0.37309800  | -0.33070900 |
| C | -1.02642000 | 0.00021700  | -1.06112800 |
| C | -1.13131900 | -0.44879100 | -2.39052100 |
| C | -2.38719300 | -0.62502900 | -2.94037800 |
| C | -3.53405500 | -0.29207300 | -2.19865200 |
| H | -4.31937100 | 0.51946700  | -0.36367800 |
| H | -2.06795200 | 0.76431000  | 0.67724800  |
| H | -0.23075600 | -0.68529500 | -2.94911900 |
| H | -2.49022500 | -1.01170900 | -3.94893500 |

|   |             |             |             |
|---|-------------|-------------|-------------|
| H | -4.51425000 | -0.43287900 | -2.64435400 |
| C | 0.32539700  | 0.23245600  | -0.46291800 |
| O | 1.17852000  | 0.97579500  | -0.89347800 |
| N | 0.47933100  | -0.51220800 | 0.69634200  |
| O | 1.68181900  | -0.43568300 | 1.35361400  |
| C | 2.53197400  | -1.52926200 | 0.93489600  |
| C | 1.91146600  | -2.87264500 | 1.35596500  |
| H | 3.48134000  | -1.32947600 | 1.43165600  |
| H | 2.66803700  | -1.45531000 | -0.14841900 |
| C | 0.44388600  | -2.68959400 | 1.78135200  |
| H | 1.96558900  | -3.57977900 | 0.52465200  |
| H | 2.45701000  | -3.30257000 | 2.19925200  |
| H | -0.09730600 | -3.63565700 | 1.79066100  |
| H | 0.38667900  | -2.24377200 | 2.78013200  |
| C | -0.22049000 | -1.71729400 | 0.83835900  |
| C | -1.29836900 | -1.99961900 | 0.14480000  |
| C | -2.39316600 | -2.73333400 | -0.29196400 |
| C | -3.61371200 | -2.68709300 | 0.43354800  |
| C | -2.29970600 | -3.51189200 | -1.47501800 |
| C | -4.68901400 | -3.44124700 | 0.00836200  |
| H | -3.67457200 | -2.06474100 | 1.32113300  |
| C | -3.38926000 | -4.25765100 | -1.89072400 |
| H | -1.36621600 | -3.51998300 | -2.02927100 |
| C | -4.57341400 | -4.22164100 | -1.14940000 |
| H | -5.62069300 | -3.42686200 | 0.56308100  |
| H | -3.32640500 | -4.86387600 | -2.78766500 |
| H | -5.42571800 | -4.80762200 | -1.48065400 |

**Int4**

**E = -900.119242 a.u.**

|   |             |             |             |
|---|-------------|-------------|-------------|
| C | -3.24180800 | 0.41877900  | -0.44880000 |
| C | -1.86039400 | 0.05556800  | -0.12079200 |
| C | -0.97956800 | -0.32261600 | -1.33452600 |
| C | -1.54866900 | -0.20910500 | -2.68088800 |
| C | -2.86513400 | 0.02040500  | -2.83866900 |
| C | -3.72161800 | 0.33126100  | -1.70619000 |
| H | -3.85619800 | 0.80269300  | 0.35943100  |
| H | -1.39184300 | 0.57088500  | 0.71327000  |
| H | -0.87138200 | -0.32076300 | -3.52188000 |
| H | -3.28987200 | 0.06617900  | -3.83620300 |
| H | -4.75487200 | 0.59801000  | -1.90535000 |
| C | 0.47176800  | -0.08761100 | -1.11104900 |
| O | 1.28051900  | 0.58897800  | -1.66371000 |
| N | 0.80294100  | -0.92053800 | 0.04038400  |
| O | 2.05588800  | -0.86247100 | 0.54461500  |
| C | 2.41228700  | -2.12258600 | 1.17740900  |
| C | 1.35785700  | -2.50853400 | 2.19749000  |
| H | 3.38019600  | -1.90848500 | 1.62815900  |
| H | 2.51895700  | -2.87274800 | 0.38660000  |
| C | 0.00524800  | -2.69089800 | 1.50472700  |
| H | 1.65540700  | -3.43727100 | 2.68842700  |
| H | 1.29023500  | -1.72540500 | 2.95783900  |
| H | -0.07800600 | -3.67113100 | 1.01337100  |
| H | -0.84373600 | -2.61978300 | 2.19377700  |
| C | -0.17800100 | -1.68251100 | 0.43918000  |
| C | -1.39401000 | -1.39266200 | -0.33222100 |
| C | -2.33123700 | -2.51753600 | -0.61744200 |
| C | -3.42796700 | -2.74724300 | 0.21538900  |
| C | -2.07147300 | -3.37453500 | -1.68843600 |
| C | -4.26254400 | -3.83567700 | -0.02357600 |

|   |             |             |             |
|---|-------------|-------------|-------------|
| H | -3.62425700 | -2.07201500 | 1.04460400  |
| C | -2.90975500 | -4.46060300 | -1.92677800 |
| H | -1.21429600 | -3.18577400 | -2.33055900 |
| C | -4.00464100 | -4.69002900 | -1.09510600 |
| H | -5.11400700 | -4.01664600 | 0.62527700  |
| H | -2.70789100 | -5.12617100 | -2.76040700 |
| H | -4.65906400 | -5.53610100 | -1.28281400 |

**Int3'**

**E = -1371.503255 a.u.**

|   |             |             |             |
|---|-------------|-------------|-------------|
| C | 2.03269300  | -1.05802100 | -0.01664300 |
| C | 0.96724300  | -1.94661400 | -0.14788400 |
| C | 0.03360500  | -1.74361000 | -1.16998400 |
| C | 0.15910100  | -0.66477300 | -2.04833600 |
| C | 1.20804200  | 0.23443700  | -1.88911400 |
| C | 2.14839100  | 0.03403800  | -0.87704900 |
| H | 2.77085800  | -1.21784300 | 0.76338200  |
| H | 0.87283400  | -2.80188300 | 0.52070600  |
| H | -0.57083200 | -0.53269700 | -2.84154800 |
| H | 1.29921900  | 1.08385400  | -2.55881200 |
| H | 2.97441600  | 0.72942600  | -0.76136200 |
| C | -1.07699100 | -2.70708500 | -1.42115800 |
| O | -1.39251500 | -3.07610500 | -2.53618200 |
| N | -1.70127500 | -3.23217300 | -0.29145500 |
| O | -2.65451400 | -4.20049700 | -0.58973600 |
| C | -2.65625400 | -5.18825000 | 0.45632500  |
| C | -3.14991800 | -4.54354600 | 1.74053500  |
| H | -1.64451100 | -5.59429400 | 0.56370200  |
| H | -3.33701300 | -5.95975500 | 0.09255700  |
| C | -2.26063800 | -3.35371200 | 2.11683100  |

|   |             |             |            |
|---|-------------|-------------|------------|
| H | -4.18375700 | -4.21195700 | 1.59790100 |
| H | -3.13257900 | -5.27539600 | 2.55358300 |
| H | -2.71291800 | -2.74383900 | 2.90067300 |
| H | -1.27856600 | -3.69615200 | 2.46115300 |
| C | -2.00790700 | -2.50301100 | 0.88887400 |
| C | -2.05415800 | -1.20366900 | 0.87869400 |
| C | -2.06981000 | 0.15181500  | 0.86517800 |
| C | -0.84052600 | 0.88980100  | 0.91612600 |
| C | -3.32421600 | 0.84123800  | 0.77132800 |
| C | -0.87733700 | 2.26398600  | 0.85016800 |
| H | 0.09635400  | 0.34559100  | 0.98799500 |
| C | -3.33438800 | 2.21486000  | 0.75346900 |
| H | -4.23958000 | 0.26026600  | 0.72851100 |
| C | -2.11587800 | 2.91670100  | 0.79079800 |
| H | 0.04088900  | 2.84013800  | 0.86687900 |
| H | -4.27026900 | 2.75955300  | 0.70196100 |
| H | -2.13635700 | 4.00292300  | 0.76695400 |
| C | -2.04027700 | 2.38768600  | 4.11367200 |
| C | -1.07276300 | 3.39111800  | 4.07270600 |
| C | 0.27607600  | 3.05028300  | 3.98267700 |
| C | 0.66223200  | 1.71262600  | 3.92161300 |
| C | -0.31239500 | 0.71412100  | 3.95761200 |
| C | -1.66575700 | 1.04708600  | 4.05609100 |
| H | -3.09315200 | 2.64589500  | 4.18469700 |
| H | -1.36884900 | 4.43507200  | 4.11402600 |
| H | 1.03511000  | 3.82701400  | 3.95445400 |
| H | 1.71318800  | 1.45102200  | 3.84485600 |
| H | -2.42159500 | 0.26693000  | 4.08296900 |
| I | 0.24755200  | -1.30934900 | 3.80685200 |
| C | 0.86015300  | -5.03347100 | 2.73281400 |

|   |            |             |            |
|---|------------|-------------|------------|
| O | 0.84656300 | -4.17105200 | 3.65198500 |
| O | 0.69109000 | -4.80262300 | 1.50518700 |
| C | 1.05123100 | -6.49427300 | 3.13636700 |
| H | 0.08585400 | -7.00854800 | 3.06026200 |
| H | 1.74146500 | -6.99087900 | 2.44878800 |
| H | 1.41677800 | -6.58457700 | 4.16109400 |

**TS3-4'**

**E = -1371.497159 a.u.**

|   |             |             |             |
|---|-------------|-------------|-------------|
| C | 1.49437300  | -0.38803100 | -0.54788800 |
| C | 0.94325400  | -1.66055700 | -0.54636900 |
| C | -0.09656800 | -1.95468000 | -1.45067800 |
| C | -0.54366700 | -0.99852400 | -2.37771300 |
| C | -0.01856200 | 0.28306800  | -2.33313900 |
| C | 0.99297800  | 0.58711700  | -1.41475800 |
| H | 2.29420300  | -0.14289100 | 0.14344800  |
| H | 1.27876900  | -2.42348700 | 0.15264300  |
| H | -1.32094200 | -1.26332300 | -3.08891200 |
| H | -0.38298900 | 1.04499400  | -3.01424200 |
| H | 1.40445100  | 1.59178200  | -1.38507300 |
| C | -0.64675000 | -3.34217100 | -1.53566600 |
| O | -0.49276100 | -4.09102400 | -2.47992000 |
| N | -1.37679900 | -3.69281700 | -0.42222000 |
| O | -2.06261200 | -4.88807600 | -0.56598600 |
| C | -2.35179200 | -5.47101500 | 0.71428900  |
| C | -3.32870300 | -4.56293500 | 1.43185900  |
| H | -1.41510500 | -5.60377100 | 1.26747800  |
| H | -2.78199900 | -6.44298000 | 0.46916700  |
| C | -2.66776700 | -3.20630700 | 1.67098200  |
| H | -4.23350600 | -4.46638000 | 0.82342700  |

|   |             |             |             |
|---|-------------|-------------|-------------|
| H | -3.60463500 | -4.99177400 | 2.39955700  |
| H | -3.38333800 | -2.44025000 | 1.97540400  |
| H | -1.91425300 | -3.31612800 | 2.45971600  |
| C | -1.90174900 | -2.72194300 | 0.44355200  |
| C | -1.63384900 | -1.44377000 | 0.32548700  |
| C | -1.74768600 | -0.07392500 | 0.47735600  |
| C | -0.82238800 | 0.66795100  | 1.26031100  |
| C | -2.82396900 | 0.59565900  | -0.17321500 |
| C | -1.01181400 | 2.02831200  | 1.43657200  |
| H | 0.00757700  | 0.15085400  | 1.72853900  |
| C | -2.99071200 | 1.95257500  | 0.00490700  |
| H | -3.50374800 | 0.01661500  | -0.79049300 |
| C | -2.08978800 | 2.66111500  | 0.81380800  |
| H | -0.32475700 | 2.59796200  | 2.05488100  |
| H | -3.81342500 | 2.47076900  | -0.47518500 |
| H | -2.23201300 | 3.72878900  | 0.95511900  |
| C | -1.31436700 | 2.78017600  | 5.03835800  |
| C | -0.11056800 | 3.45688800  | 4.84967200  |
| C | 1.03979500  | 2.74213900  | 4.51903100  |
| C | 0.99005300  | 1.35550200  | 4.37613400  |
| C | -0.21772600 | 0.68427500  | 4.57301800  |
| C | -1.37331700 | 1.39372500  | 4.90209700  |
| H | -2.21486700 | 3.33040100  | 5.29547800  |
| H | -0.06886300 | 4.53616900  | 4.96096200  |
| H | 1.98255500  | 3.26070900  | 4.37001700  |
| H | 1.88771600  | 0.80293600  | 4.11488000  |
| H | -2.31380800 | 0.87212100  | 5.05126100  |
| I | -0.29762700 | -1.40888500 | 4.31790600  |
| C | 0.34959500  | -4.58793100 | 3.00932100  |
| O | -0.40653200 | -4.26082400 | 3.97074000  |

|   |            |             |            |
|---|------------|-------------|------------|
| O | 0.57024100 | -3.89305000 | 1.98666300 |
| C | 1.00735100 | -5.96349700 | 3.10893100 |
| H | 0.23965700 | -6.73565300 | 2.98279100 |
| H | 1.77360100 | -6.09918500 | 2.34308400 |
| H | 1.44609100 | -6.10149200 | 4.10135500 |

**Int4'**

**E = -1371.546788 a.u.**

|   |             |             |             |
|---|-------------|-------------|-------------|
| C | 1.39000100  | -0.47623500 | -0.01473700 |
| C | 0.48858600  | -1.63356700 | -0.01022400 |
| C | -0.37334400 | -1.78194400 | -1.29020500 |
| C | -0.20302500 | -0.81143100 | -2.37476300 |
| C | 0.56082200  | 0.28155200  | -2.19255400 |
| C | 1.37185600  | 0.44622200  | -0.99794300 |
| H | 2.11495600  | -0.41756300 | 0.79201400  |
| H | 0.83198000  | -2.53806300 | 0.48620200  |
| H | -0.71221500 | -1.01404200 | -3.31221200 |
| H | 0.65403800  | 1.01516600  | -2.98694100 |
| H | 2.05368400  | 1.29015600  | -0.95531500 |
| C | -0.77625300 | -3.17480700 | -1.59702900 |
| O | -0.57533000 | -3.88955300 | -2.53162500 |
| N | -1.56635500 | -3.59440000 | -0.45594600 |
| O | -2.01867100 | -4.86753700 | -0.45514800 |
| C | -2.59418800 | -5.26415400 | 0.82164400  |
| C | -3.45399300 | -4.15593200 | 1.39723900  |
| H | -1.76988900 | -5.52889800 | 1.48664700  |
| H | -3.17155900 | -6.15014000 | 0.55972800  |
| C | -2.60018800 | -2.90648100 | 1.62184100  |
| H | -4.28201700 | -3.93850800 | 0.71570500  |
| H | -3.87218100 | -4.49659200 | 2.34687500  |



|   |             |             |             |
|---|-------------|-------------|-------------|
| H | -3.19228000 | -2.00768800 | 1.81985800  |
| H | -1.91420700 | -3.04981400 | 2.47007500  |
| C | -1.74277600 | -2.66739800 | 0.44320800  |
| C | -1.02853100 | -1.43403900 | 0.04493100  |
| C | -1.69458400 | -0.12261200 | 0.30698300  |
| C | -1.19749600 | 0.76336000  | 1.26232200  |
| C | -2.86058000 | 0.19714200  | -0.39411000 |
| C | -1.86544700 | 1.95566300  | 1.52897600  |
| H | -0.28413000 | 0.52099500  | 1.79309500  |
| C | -3.52918900 | 1.38917800  | -0.12811100 |
| H | -3.24326300 | -0.49198800 | -1.14401900 |
| C | -3.03284100 | 2.26835700  | 0.83429100  |
| H | -1.46956100 | 2.63772500  | 2.27740000  |
| H | -4.43562500 | 1.63279400  | -0.67369700 |
| H | -3.55520200 | 3.19811800  | 1.03937600  |
| C | -0.85920000 | 2.72393300  | 5.35028000  |
| C | 0.17606800  | 3.48041500  | 4.80414000  |
| C | 1.18837400  | 2.84868600  | 4.08339300  |
| C | 1.17123800  | 1.46505700  | 3.90890600  |
| C | 0.13007500  | 0.71559500  | 4.45782600  |
| C | -0.88869100 | 1.34055700  | 5.17749300  |
| H | -1.65245500 | 3.20896500  | 5.91164400  |
| H | 0.19458900  | 4.55743700  | 4.94012700  |
| H | 1.99933800  | 3.43012000  | 3.65432100  |
| H | 1.96228400  | 0.97587400  | 3.34820500  |
| H | -1.69941500 | 0.75617800  | 5.60161600  |
| I | 0.04898300  | -1.37122900 | 4.15269700  |
| C | 0.31198700  | -4.69679000 | 2.81035100  |
| O | -0.29522500 | -4.23358700 | 3.81518000  |
| O | 0.26864800  | -4.21161400 | 1.64786400  |

|   |            |             |            |
|---|------------|-------------|------------|
| C | 1.11255300 | -5.98003700 | 3.01186600 |
| H | 0.44767300 | -6.83635700 | 2.84615100 |
| H | 1.93416700 | -6.04858900 | 2.29523700 |
| H | 1.49644000 | -6.04483300 | 4.03261600 |

**TS4-5**

**E = -900.107443a.u.**

|   |             |             |             |
|---|-------------|-------------|-------------|
| C | -4.18125200 | 1.31848800  | -0.57053200 |
| C | -3.19101900 | 0.56702000  | 0.07237600  |
| C | -1.86061500 | 0.05148700  | -1.24820200 |
| C | -2.14573300 | 0.56711300  | -2.52352900 |
| C | -3.41519500 | 0.96515200  | -2.88843000 |
| C | -4.39689700 | 1.32315300  | -1.93973400 |
| H | -4.74612100 | 2.01440000  | 0.04410300  |
| H | -2.83620100 | 0.86660600  | 1.05600700  |
| H | -1.31210700 | 0.69559800  | -3.20944100 |
| H | -3.59689500 | 1.23215100  | -3.92473400 |
| H | -5.27019800 | 1.85186600  | -2.31209400 |
| C | -0.50236000 | -0.10167300 | -0.72807000 |
| O | 0.56786500  | 0.33347000  | -1.02741600 |
| N | -0.66790400 | -1.03899600 | 0.39954200  |
| O | 0.42344200  | -1.35892500 | 1.11860700  |
| C | 0.22661800  | -2.60421700 | 1.84699800  |
| C | -1.07505700 | -2.56112300 | 2.62433100  |
| H | 1.10577200  | -2.65483200 | 2.48714900  |
| H | 0.24139100  | -3.41714200 | 1.11344400  |
| C | -2.24716800 | -2.39302500 | 1.65412600  |
| H | -1.18405900 | -3.49006200 | 3.18745200  |
| H | -1.04623700 | -1.72893700 | 3.33335400  |
| C | -1.88289200 | -1.44710900 | 0.57809400  |

|   |             |             |             |
|---|-------------|-------------|-------------|
| C | -2.78070600 | -0.78544300 | -0.42385800 |
| C | -3.77360500 | -1.72850600 | -1.05160200 |
| C | -5.05960200 | -1.84976200 | -0.52520900 |
| C | -3.37193600 | -2.53544500 | -2.11685300 |
| C | -5.94514600 | -2.77730800 | -1.06857800 |
| H | -5.36809500 | -1.21826600 | 0.30367900  |
| C | -4.26120900 | -3.45917400 | -2.65995500 |
| H | -2.36726000 | -2.43745800 | -2.52125000 |
| C | -5.54807300 | -3.57922800 | -2.13723600 |
| H | -6.94568100 | -2.87154400 | -0.65802300 |
| H | -3.94977900 | -4.08274100 | -3.49221000 |
| H | -6.24198400 | -4.29774400 | -2.56282900 |
| H | -2.51822400 | -3.33962200 | 1.16640300  |
| H | -3.15668100 | -2.02052900 | 2.13918300  |

**Int5**

**E = -900.119950 a.u.**

|   |             |             |             |
|---|-------------|-------------|-------------|
| C | -4.28644800 | 1.40831800  | -0.43287700 |
| C | -3.54381400 | 0.53125600  | 0.26596900  |
| C | -1.82221400 | 0.01275300  | -1.37167500 |
| C | -2.11290400 | 0.74994000  | -2.46694000 |
| C | -3.43010000 | 1.21867300  | -2.79271600 |
| C | -4.39490200 | 1.50439200  | -1.87522100 |
| H | -4.87032600 | 2.13259000  | 0.13078500  |
| H | -3.48414700 | 0.61357200  | 1.34845100  |
| H | -1.29247400 | 1.02098700  | -3.12961600 |
| H | -3.61109400 | 1.49453100  | -3.82732400 |
| H | -5.29554700 | 1.98805900  | -2.24644800 |
| C | -0.46831300 | -0.35620400 | -0.98897900 |
| O | 0.62808100  | -0.15617900 | -1.41940600 |

|   |             |             |             |
|---|-------------|-------------|-------------|
| N | -0.67406300 | -1.17916300 | 0.22350100  |
| O | 0.41943300  | -1.66998700 | 0.83468400  |
| C | 0.08822000  | -2.79885200 | 1.69229400  |
| C | -1.07282600 | -2.44533700 | 2.60201700  |
| H | 1.01667100  | -2.97763900 | 2.23244300  |
| H | -0.14358700 | -3.64801500 | 1.04110500  |
| C | -2.30390200 | -2.12427400 | 1.75092500  |
| H | -1.28240600 | -3.29132900 | 3.25948200  |
| H | -0.80131700 | -1.58567700 | 3.22089800  |
| C | -1.91054400 | -1.32785500 | 0.56806100  |
| C | -2.81222700 | -0.60572200 | -0.41389700 |
| C | -3.72778900 | -1.67137900 | -1.04328800 |
| C | -5.04594300 | -1.82548100 | -0.61426000 |
| C | -3.20250400 | -2.55122200 | -1.99321000 |
| C | -5.83812800 | -2.84157700 | -1.14539900 |
| H | -5.46125700 | -1.15156800 | 0.12814700  |
| C | -3.99719800 | -3.56344900 | -2.52313900 |
| H | -2.17262400 | -2.44656500 | -2.32742700 |
| C | -5.31787400 | -3.70993300 | -2.10159900 |
| H | -6.86499200 | -2.95008000 | -0.80986300 |
| H | -3.58264900 | -4.23889200 | -3.26516900 |
| H | -5.93768800 | -4.49894000 | -2.51660500 |
| H | -2.78299500 | -3.03643400 | 1.36954200  |
| H | -3.07591600 | -1.57312400 | 2.29931400  |

**Int6**

**E = -1128.656064 a.u.**

|   |             |             |             |
|---|-------------|-------------|-------------|
| C | -4.05294000 | 1.41238400  | -0.75939200 |
| C | -3.44227900 | 0.56899800  | 0.09226400  |
| C | -1.79997700 | -0.45369200 | -1.38745000 |

|   |             |             |             |
|---|-------------|-------------|-------------|
| C | -1.96706100 | 0.14230300  | -2.58765100 |
| C | -3.19729200 | 0.74044300  | -3.02871900 |
| C | -4.12282300 | 1.30035800  | -2.20281100 |
| H | -4.54096600 | 2.28608900  | -0.33300200 |
| H | -3.38791700 | 0.81689600  | 1.14974900  |
| H | -1.10692800 | 0.18713800  | -3.25422700 |
| H | -3.32045800 | 0.87520300  | -4.09938400 |
| H | -4.93733000 | 1.84268400  | -2.67719900 |
| C | -0.51019100 | -0.92782000 | -0.90472300 |
| O | 0.59845700  | -0.96649700 | -1.35434100 |
| N | -0.81111400 | -1.43236500 | 0.43683800  |
| O | 0.21806700  | -1.93394200 | 1.14378000  |
| C | -0.21784300 | -2.78048700 | 2.24698100  |
| C | -1.35913300 | -2.12548700 | 3.00038500  |
| H | 0.68617700  | -2.87689400 | 2.84720100  |
| H | -0.51009500 | -3.74075600 | 1.81849400  |
| C | -2.54192000 | -1.91932000 | 2.05152100  |
| H | -1.65340400 | -2.77267200 | 3.82928600  |
| H | -1.02653300 | -1.16855700 | 3.41348200  |
| C | -2.06092800 | -1.39590600 | 0.75745600  |
| C | -2.86633000 | -0.75829500 | -0.36528400 |
| C | -3.95474400 | -1.74626400 | -0.81751900 |
| C | -5.09986400 | -1.88930700 | -0.02996900 |
| C | -3.80719700 | -2.52722600 | -1.96323200 |
| C | -6.08046300 | -2.81425100 | -0.37607600 |
| H | -5.22922000 | -1.27507200 | 0.85796800  |
| C | -4.79674800 | -3.44406200 | -2.31402800 |
| H | -2.91620400 | -2.43848600 | -2.57644100 |
| C | -5.93037200 | -3.59542800 | -1.51965400 |
| H | -6.96221100 | -2.92167100 | 0.24852000  |

|   |             |             |             |
|---|-------------|-------------|-------------|
| H | -4.67496800 | -4.04359500 | -3.21165400 |
| H | -6.69633300 | -4.31503000 | -1.79338900 |
| H | -3.03587200 | -2.87585500 | 1.81309400  |
| H | -3.30207500 | -1.24186700 | 2.45450700  |
| C | -2.55796400 | -4.78697300 | -0.25033100 |
| O | -1.56525600 | -4.00716900 | -0.27209900 |
| O | -3.47909900 | -4.77670900 | 0.60844300  |
| C | -2.61980600 | -5.85913600 | -1.33816600 |
| H | -3.63937100 | -6.22631000 | -1.47837100 |
| H | -2.22586000 | -5.47596200 | -2.28349200 |
| H | -1.98934200 | -6.70458800 | -1.03690800 |

**TS6-7**

**E = -1128.648357 a.u.**

|   |             |             |             |
|---|-------------|-------------|-------------|
| C | -4.10694000 | 1.46374900  | -0.68735100 |
| C | -3.48260300 | 0.59982600  | 0.13377900  |
| C | -1.80850500 | -0.32126600 | -1.37285400 |
| C | -1.98505400 | 0.31185800  | -2.54944100 |
| C | -3.23155700 | 0.89334800  | -2.97467600 |
| C | -4.17322600 | 1.40075200  | -2.13454900 |
| H | -4.61315400 | 2.31128500  | -0.23016600 |
| H | -3.43349800 | 0.80524800  | 1.20044300  |
| H | -1.12322000 | 0.40684300  | -3.20872500 |
| H | -3.35775000 | 1.05743900  | -4.04113500 |
| H | -5.00261100 | 1.93518300  | -2.59205500 |
| C | -0.50341600 | -0.78141200 | -0.89000700 |
| O | 0.60605500  | -0.73672300 | -1.35646700 |
| N | -0.78697200 | -1.34342400 | 0.39002000  |
| O | 0.24866700  | -1.79978100 | 1.14346900  |
| C | -0.16854000 | -2.82914600 | 2.08058700  |

|   |             |             |             |
|---|-------------|-------------|-------------|
| C | -1.39992500 | -2.39327900 | 2.85716400  |
| H | 0.70871900  | -2.94516900 | 2.71701700  |
| H | -0.35500100 | -3.74245300 | 1.51221300  |
| C | -2.51346100 | -2.05264800 | 1.87414100  |
| H | -1.70900000 | -3.22194900 | 3.50090100  |
| H | -1.15537600 | -1.53883700 | 3.49624300  |
| C | -2.06232600 | -1.36414100 | 0.72756600  |
| C | -2.87747100 | -0.69426000 | -0.37348100 |
| C | -3.93135000 | -1.69026100 | -0.87983800 |
| C | -5.13101500 | -1.82996500 | -0.17654900 |
| C | -3.68078700 | -2.51320200 | -1.97706700 |
| C | -6.06143000 | -2.79280300 | -0.55674400 |
| H | -5.34018700 | -1.18485100 | 0.67299300  |
| C | -4.61824600 | -3.46956700 | -2.36317400 |
| H | -2.74679000 | -2.42650700 | -2.52286900 |
| C | -5.80698100 | -3.61613600 | -1.65207200 |
| H | -6.98726000 | -2.89574800 | 0.00136600  |
| H | -4.41319000 | -4.10358400 | -3.22100300 |
| H | -6.53358900 | -4.36536000 | -1.95264400 |
| H | -2.85364600 | -3.14225600 | 1.34479600  |
| H | -3.45216800 | -1.67501900 | 2.28408100  |
| C | -2.47517100 | -4.73422800 | -0.14799700 |
| O | -1.47472200 | -4.08409700 | -0.50530300 |
| O | -3.22883500 | -4.43398400 | 0.84618500  |
| C | -2.84322500 | -6.00863900 | -0.88820700 |
| H | -3.92288400 | -6.17333400 | -0.87379800 |
| H | -2.47819400 | -5.97156600 | -1.91676900 |
| H | -2.36289300 | -6.85509100 | -0.38356600 |

**E = -1128.684226 a.u.**

|   |             |             |             |
|---|-------------|-------------|-------------|
| C | -4.12285200 | 1.48197300  | -0.77230800 |
| C | -3.51976300 | 0.65261400  | 0.10000700  |
| C | -1.80907100 | -0.34874200 | -1.32321100 |
| C | -1.96473200 | 0.23361400  | -2.52541700 |
| C | -3.19598200 | 0.81204800  | -3.00573500 |
| C | -4.15595700 | 1.36160800  | -2.21676500 |
| H | -4.64006200 | 2.34724800  | -0.36175200 |
| H | -3.50264000 | 0.90738000  | 1.15707800  |
| H | -1.09015800 | 0.28931100  | -3.17260800 |
| H | -3.29627500 | 0.92386100  | -4.08234500 |
| H | -4.97371800 | 1.87588100  | -2.71657800 |
| C | -0.49098600 | -0.79800500 | -0.81734700 |
| O | 0.60979200  | -0.73441600 | -1.34711700 |
| N | -0.75002200 | -1.28165800 | 0.43033400  |
| O | 0.26104500  | -1.64834300 | 1.27836600  |
| C | -0.17353400 | -2.75267200 | 2.10407900  |
| C | -1.37982900 | -2.34046100 | 2.93724300  |
| H | 0.69910700  | -2.98041900 | 2.71634300  |
| H | -0.40675300 | -3.60151900 | 1.45391300  |
| C | -2.43401300 | -1.73899100 | 2.04083100  |
| H | -1.77384800 | -3.22732200 | 3.44575000  |
| H | -1.07346100 | -1.63139900 | 3.71565200  |
| C | -2.08067500 | -1.26557900 | 0.84092800  |
| C | -2.89296900 | -0.66572900 | -0.31175000 |
| C | -3.94205300 | -1.67374100 | -0.80286700 |
| C | -5.12054100 | -1.83815000 | -0.06682100 |
| C | -3.73087800 | -2.47293800 | -1.92633200 |
| C | -6.05814300 | -2.79903500 | -0.43362300 |



|   |             |             |             |
|---|-------------|-------------|-------------|
| H | -5.30835500 | -1.20771600 | 0.79903200  |
| C | -4.67301100 | -3.43248400 | -2.29781900 |
| H | -2.82183700 | -2.36441000 | -2.50893000 |
| C | -5.83631800 | -3.60224200 | -1.55188200 |
| H | -6.96552100 | -2.91672300 | 0.15171400  |
| H | -4.49117300 | -4.04767200 | -3.17488100 |
| H | -6.56813100 | -4.35067500 | -1.84190900 |
| H | -2.95863500 | -3.66196800 | 1.01446000  |
| H | -3.47064900 | -1.69325200 | 2.36097700  |
| C | -2.42521100 | -4.82643300 | -0.37931500 |
| O | -1.46349000 | -4.14162800 | -0.67061300 |
| O | -3.24847100 | -4.51791000 | 0.62830700  |
| C | -2.81191800 | -6.10253900 | -1.06275700 |
| H | -3.89284800 | -6.13675600 | -1.21717700 |
| H | -2.28502700 | -6.18477300 | -2.01321500 |
| H | -2.53416200 | -6.94439000 | -0.41948100 |

**TS4-8**

**E = -900.089143 a.u.**

|   |             |            |             |
|---|-------------|------------|-------------|
| C | -3.28388200 | 0.27038300 | -0.70351000 |
| C | -1.87317900 | 0.03791100 | -0.39043400 |
| C | -0.96281500 | 0.11769900 | -1.53326500 |
| C | -1.40855200 | 0.17496900 | -2.83793700 |
| C | -2.78156200 | 0.26843600 | -3.05884500 |
| C | -3.71483000 | 0.34133500 | -1.99561600 |
| H | -3.98188900 | 0.37790400 | 0.12101900  |
| H | -1.52691100 | 0.54682300 | 0.51539200  |
| H | -0.70353300 | 0.15414300 | -3.66204000 |
| H | -3.14717300 | 0.31355700 | -4.08061500 |
| H | -4.76546500 | 0.48481700 | -2.22102700 |

|   |             |             |             |
|---|-------------|-------------|-------------|
| C | 0.50957300  | 0.07930500  | -1.20912600 |
| O | 1.34328500  | 0.76462300  | -1.75435800 |
| N | 0.73709300  | -0.81884600 | -0.19997500 |
| O | 2.05247600  | -1.13995700 | 0.05856200  |
| C | 2.16888800  | -1.55149000 | 1.43619600  |
| C | 1.27045800  | -2.77208900 | 1.71821000  |
| H | 1.91544300  | -0.69823600 | 2.07180400  |
| H | 3.22994800  | -1.77895500 | 1.53928400  |
| C | 0.38273200  | -3.09747300 | 0.49912700  |
| H | 1.87544300  | -3.65028500 | 1.95328600  |
| H | 0.63229300  | -2.56519500 | 2.58089000  |
| H | 0.99652200  | -3.52850300 | -0.30104600 |
| H | -0.39805900 | -3.81164500 | 0.76127200  |
| C | -0.22024400 | -1.82532400 | -0.00292900 |
| C | -1.52079700 | -1.52503700 | -0.21593300 |
| C | -2.56956000 | -2.55310900 | -0.36961300 |
| C | -3.70519600 | -2.56217200 | 0.45298900  |
| C | -2.41228300 | -3.55206600 | -1.33610200 |
| C | -4.65853400 | -3.56304100 | 0.31377700  |
| H | -3.82832600 | -1.79514800 | 1.21301500  |
| C | -3.37145300 | -4.55438500 | -1.47314200 |
| H | -1.53747000 | -3.53701700 | -1.98075300 |
| C | -4.49438500 | -4.55965900 | -0.65114100 |
| H | -5.52972900 | -3.57058700 | 0.96141500  |
| H | -3.24120500 | -5.32543200 | -2.22605300 |
| H | -5.24411000 | -5.33753300 | -0.75904200 |

**Int8**

**E = -900.108841 a.u.**

|   |             |             |             |
|---|-------------|-------------|-------------|
| C | -3.25714800 | -0.38684700 | -1.84483300 |
|---|-------------|-------------|-------------|

|   |             |             |             |
|---|-------------|-------------|-------------|
| C | -1.96722000 | -0.56709600 | -1.17900600 |
| C | -0.91684400 | 0.38244300  | -1.54902300 |
| C | -1.19901400 | 1.48964500  | -2.31375900 |
| C | -2.48347700 | 1.65346700  | -2.84929000 |
| C | -3.50336000 | 0.72149000  | -2.62015300 |
| H | -4.04591900 | -1.10079800 | -1.62980900 |
| H | -2.35162700 | -0.00973700 | -0.24645000 |
| H | -0.41395600 | 2.20760200  | -2.52396500 |
| H | -2.69075200 | 2.52581600  | -3.46172500 |
| H | -4.48133500 | 0.86395600  | -3.06531800 |
| C | 0.47798600  | 0.18010400  | -1.08343800 |
| O | 1.36439200  | 1.00739900  | -1.22889700 |
| N | 0.68573500  | -1.06143900 | -0.55003400 |
| O | 1.99220000  | -1.37668900 | -0.27641800 |
| C | 2.16035400  | -1.63682900 | 1.13732600  |
| C | 1.16380900  | -2.71062200 | 1.59919500  |
| H | 2.04510100  | -0.69246800 | 1.67661300  |
| H | 3.19690500  | -1.96948800 | 1.19835400  |
| C | 0.37296000  | -3.24416100 | 0.39232600  |
| H | 1.68818900  | -3.53695700 | 2.08373400  |
| H | 0.46156600  | -2.29048700 | 2.32417100  |
| H | 1.04467200  | -3.77211900 | -0.29365100 |
| H | -0.40148300 | -3.93909400 | 0.71560400  |
| C | -0.25070500 | -2.07673800 | -0.31628300 |
| C | -1.55320900 | -1.89492100 | -0.62252000 |
| C | -2.58726100 | -2.92082200 | -0.34332300 |
| C | -3.67959300 | -2.62715900 | 0.48366400  |
| C | -2.48651600 | -4.19510500 | -0.91340900 |
| C | -4.64852900 | -3.59342500 | 0.73803200  |
| H | -3.76503500 | -1.64133000 | 0.93595100  |

|   |             |             |             |
|---|-------------|-------------|-------------|
| C | -3.45356000 | -5.16199500 | -0.65100300 |
| H | -1.64831000 | -4.42279900 | -1.56656600 |
| C | -4.53682700 | -4.86304300 | 0.17271400  |
| H | -5.48875000 | -3.35500600 | 1.38301000  |
| H | -3.36204500 | -6.14760800 | -1.09713700 |
| H | -5.29338200 | -5.61591500 | 0.37154900  |

14. <sup>1</sup>H NMR and <sup>13</sup>C NMR spectra

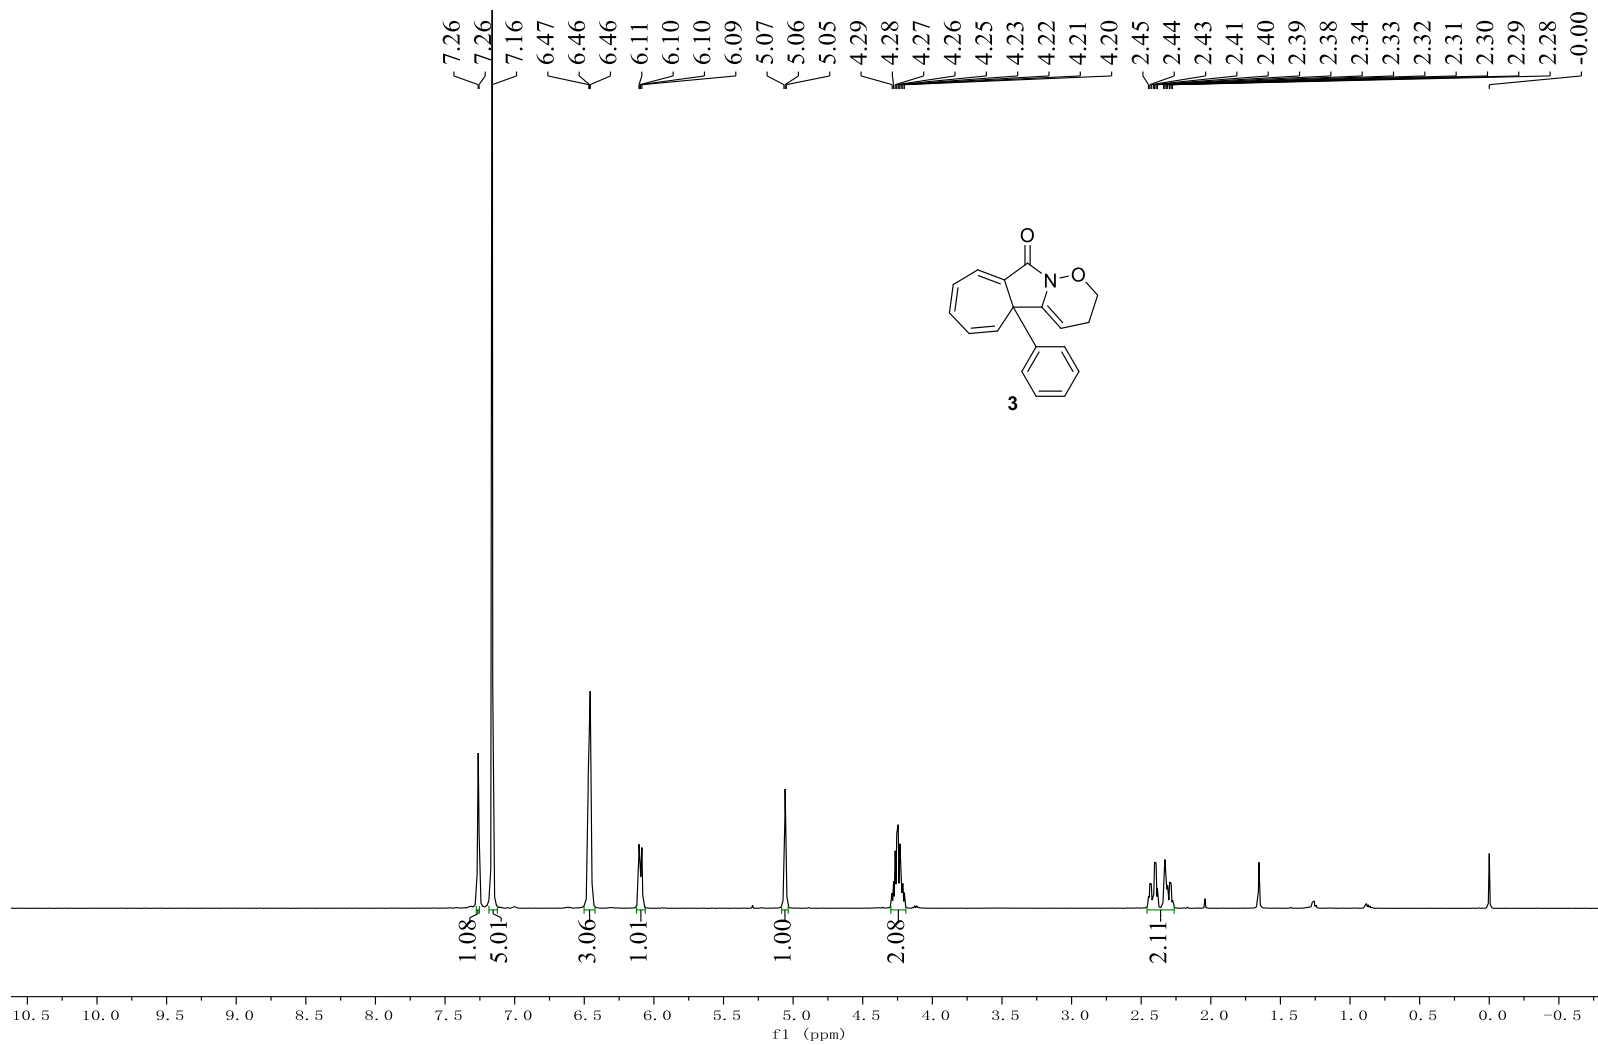

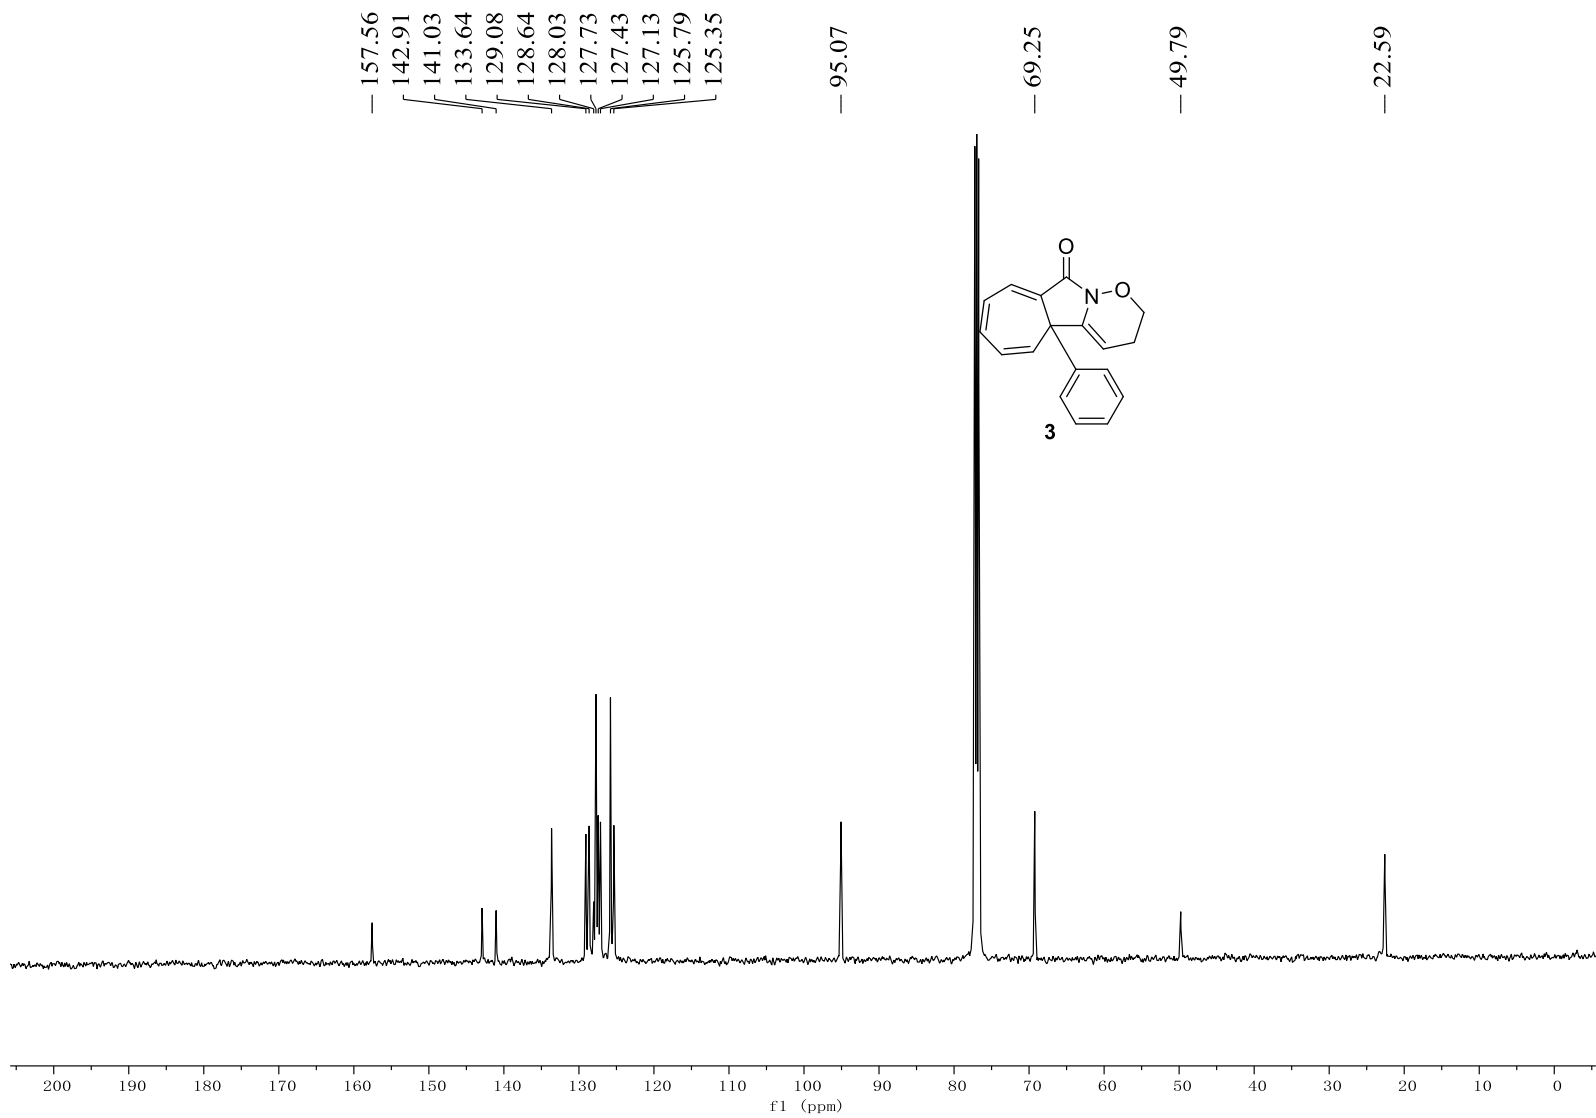

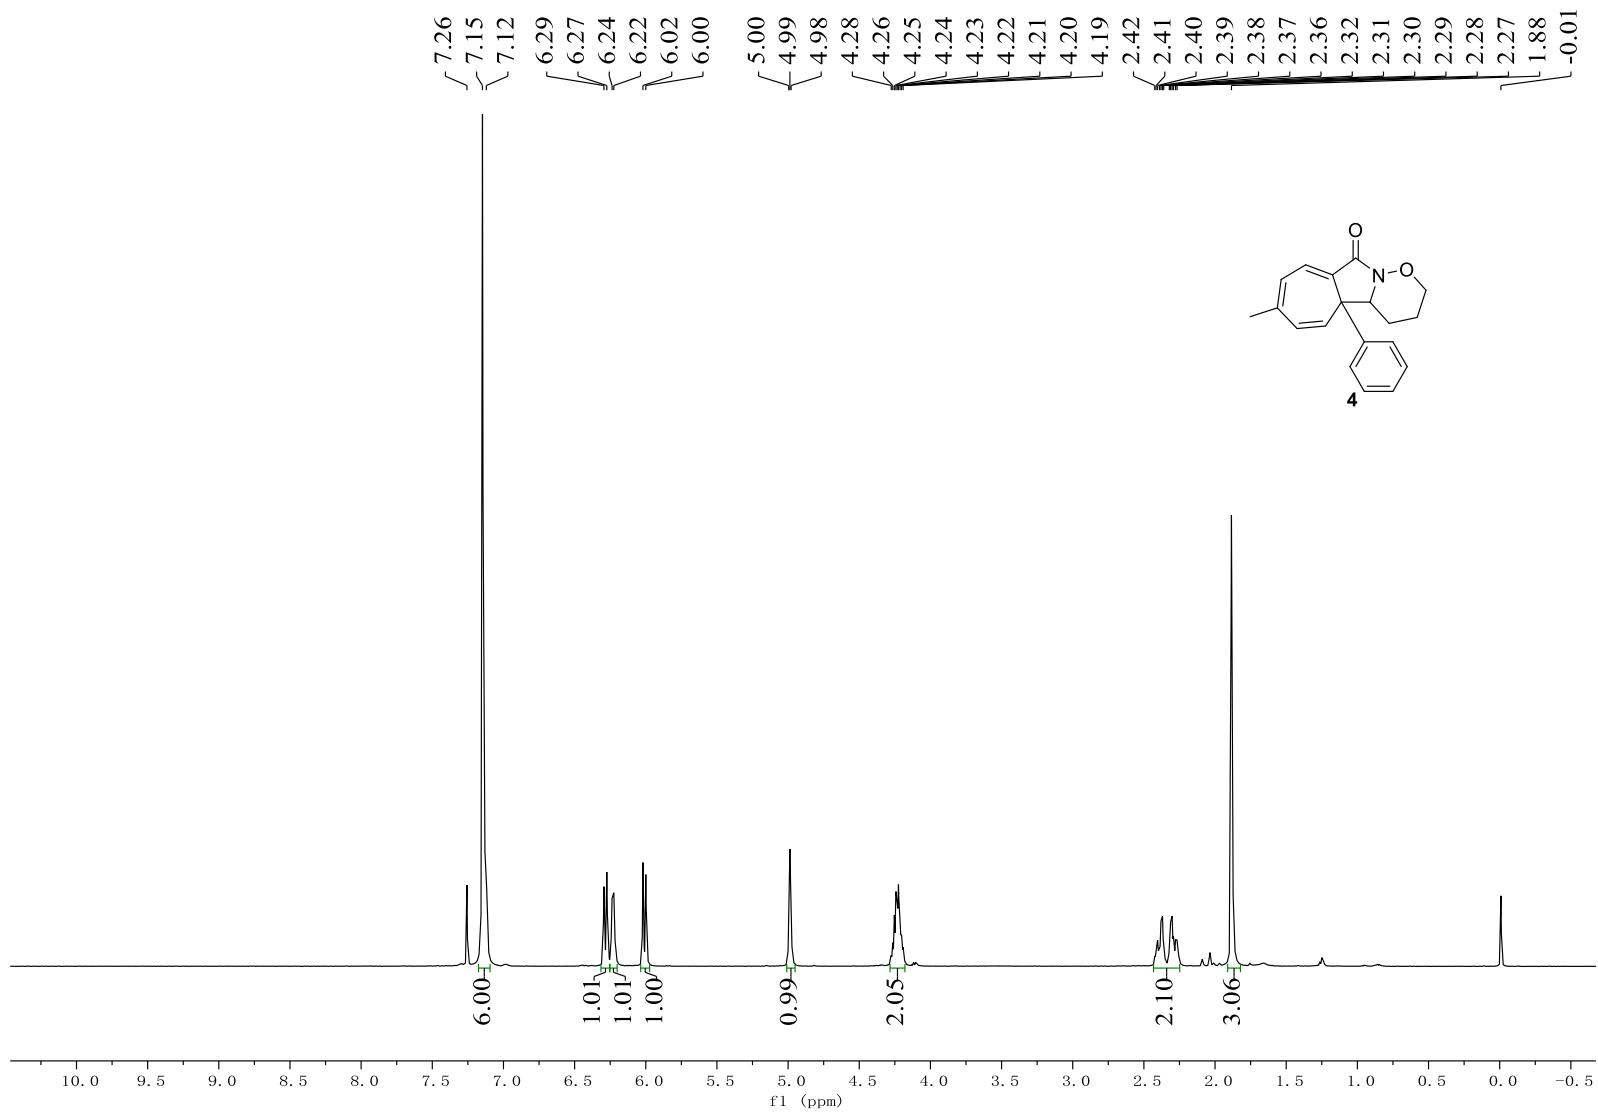

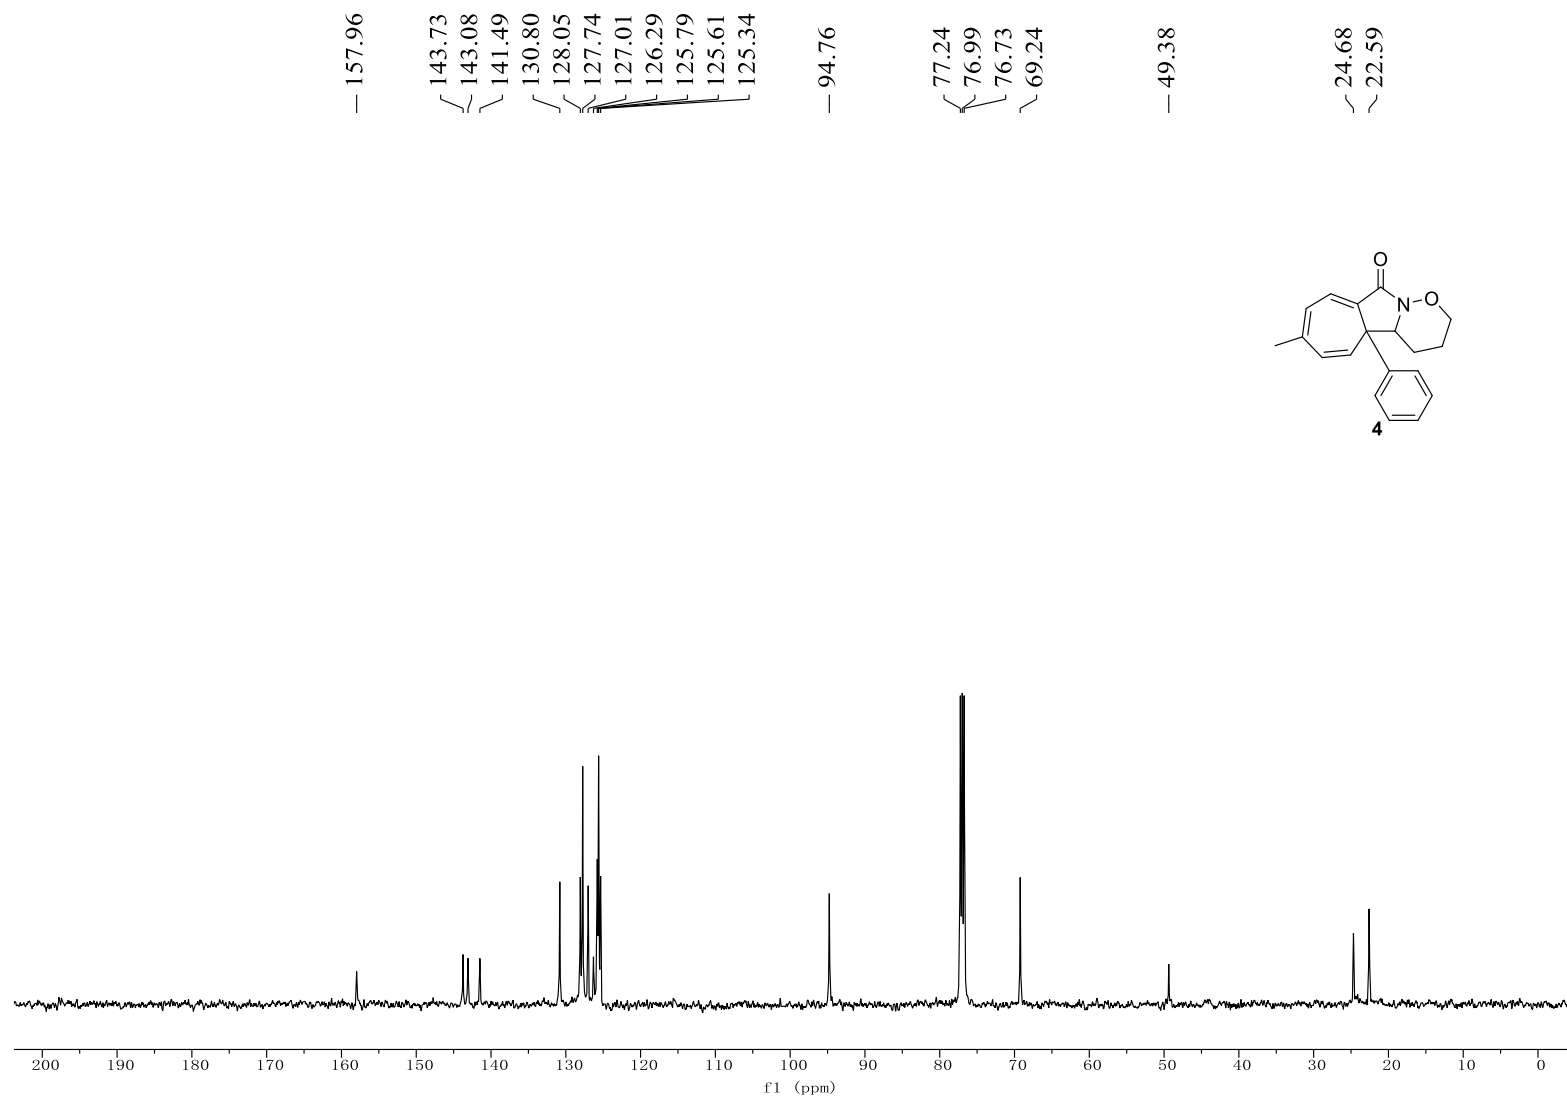



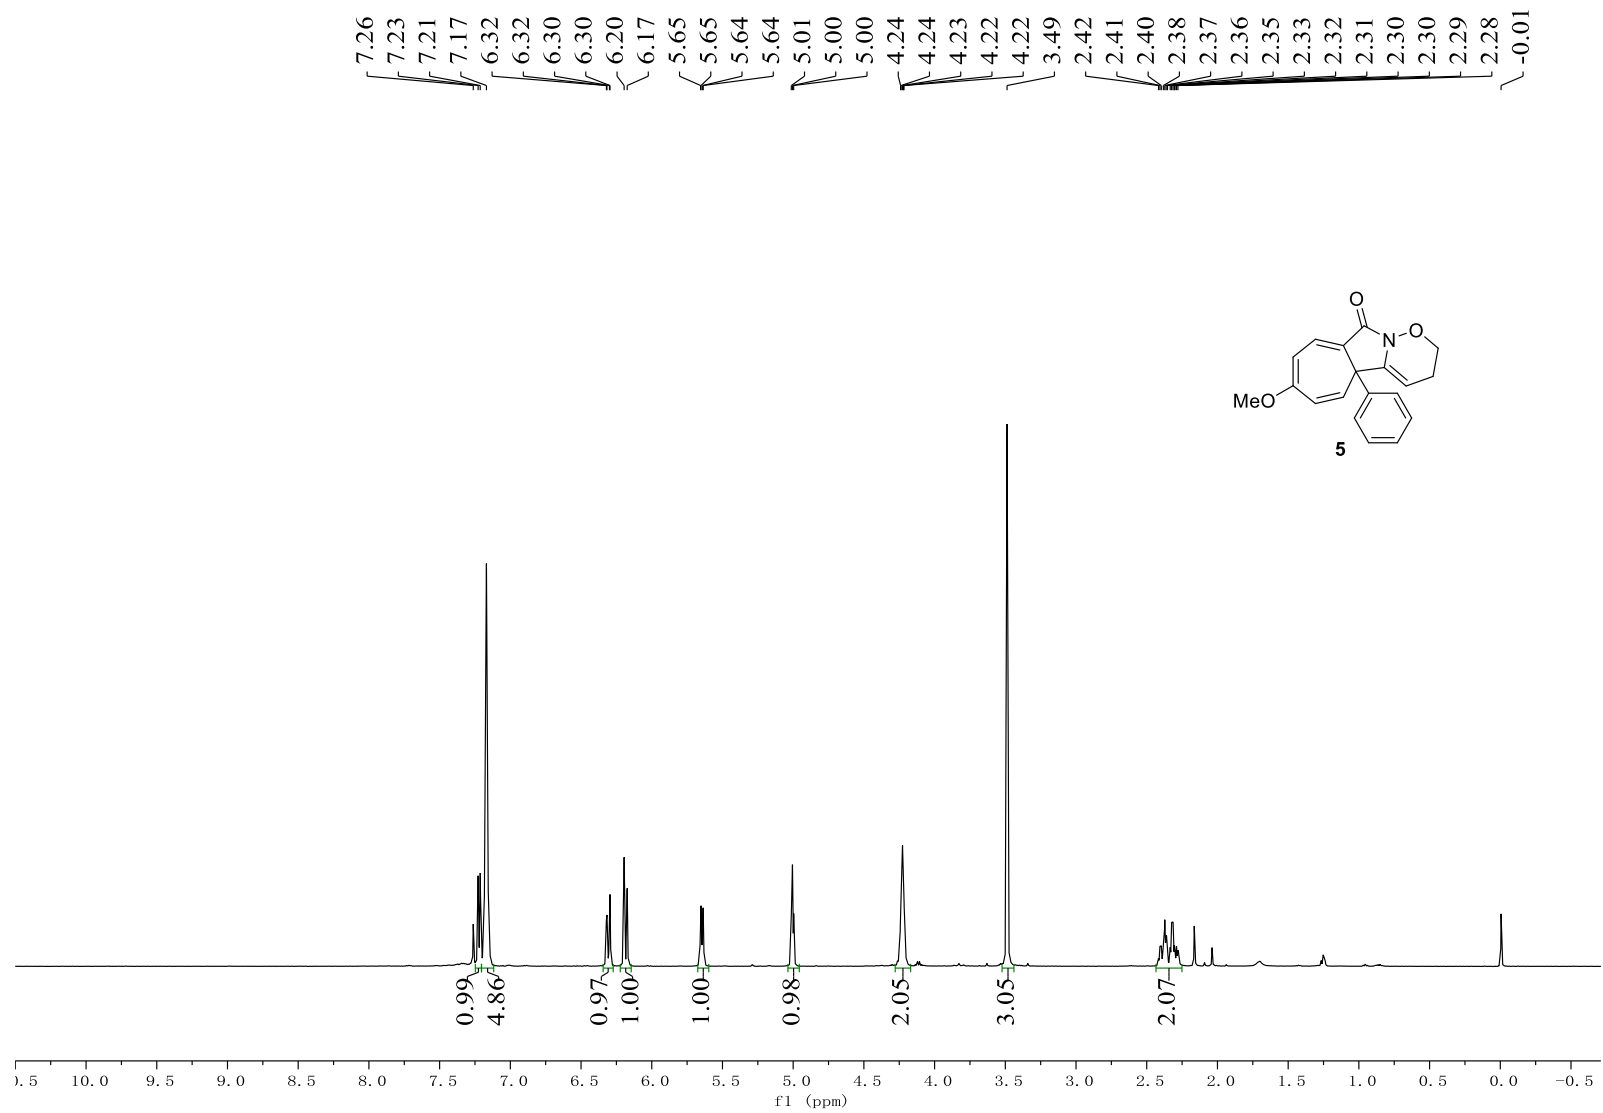

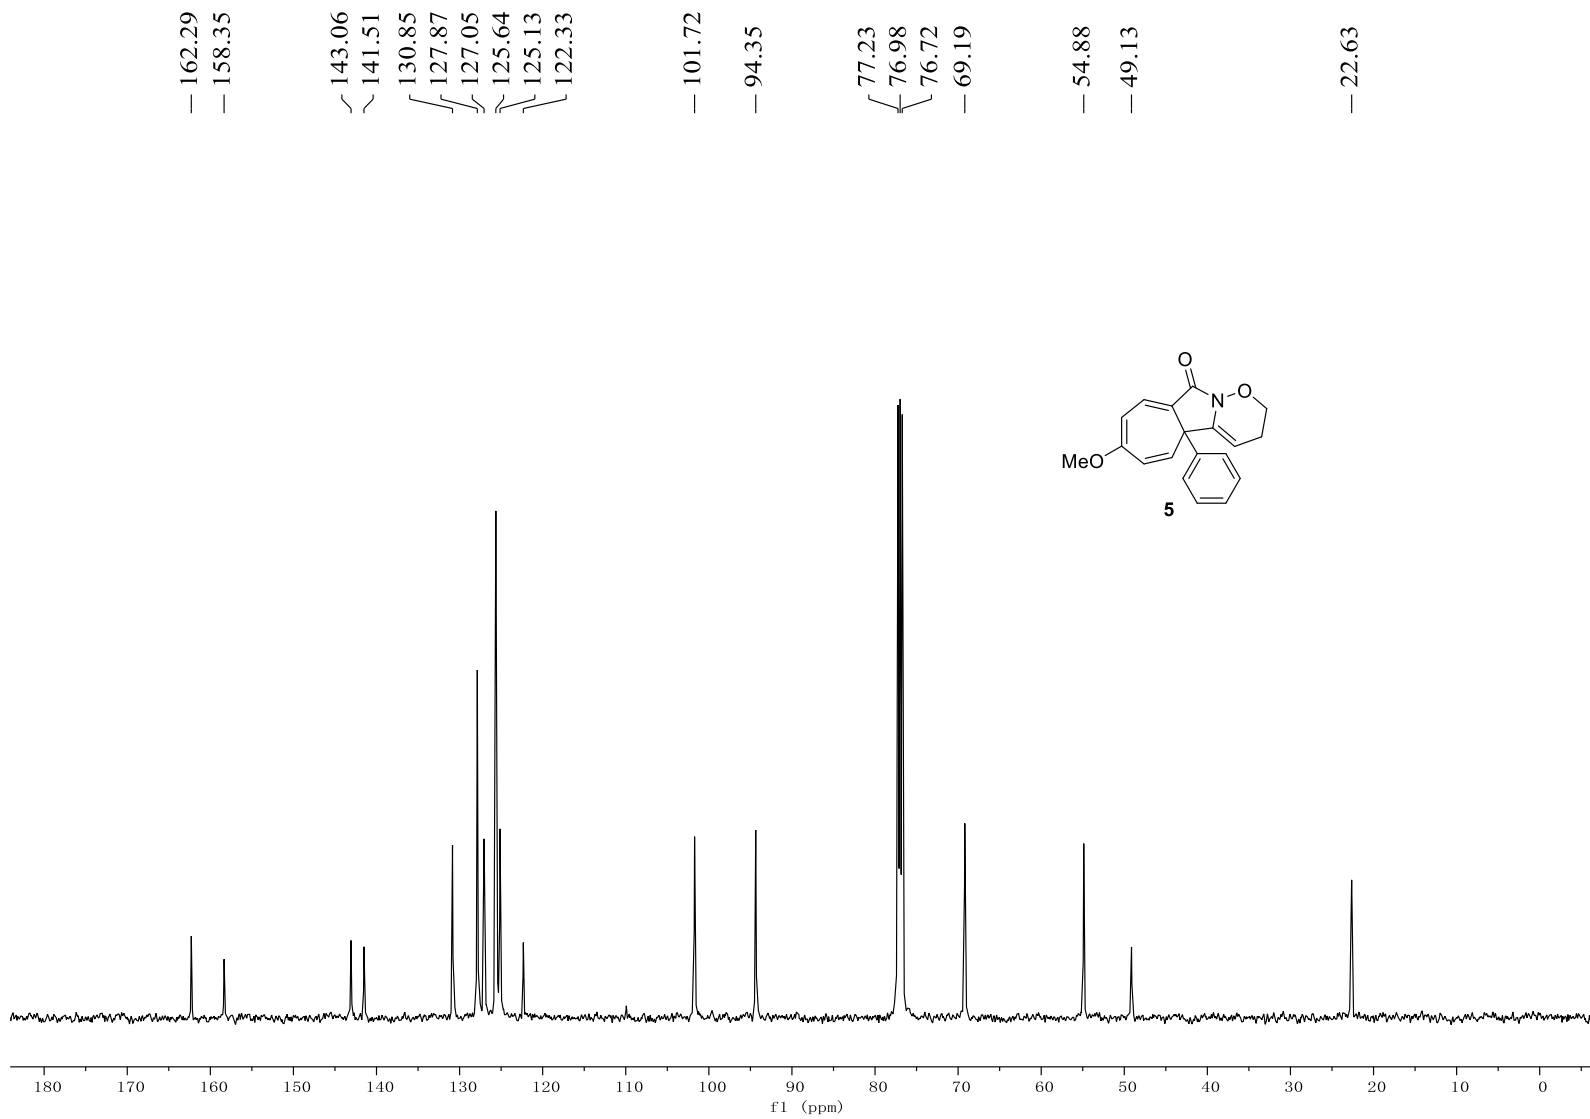

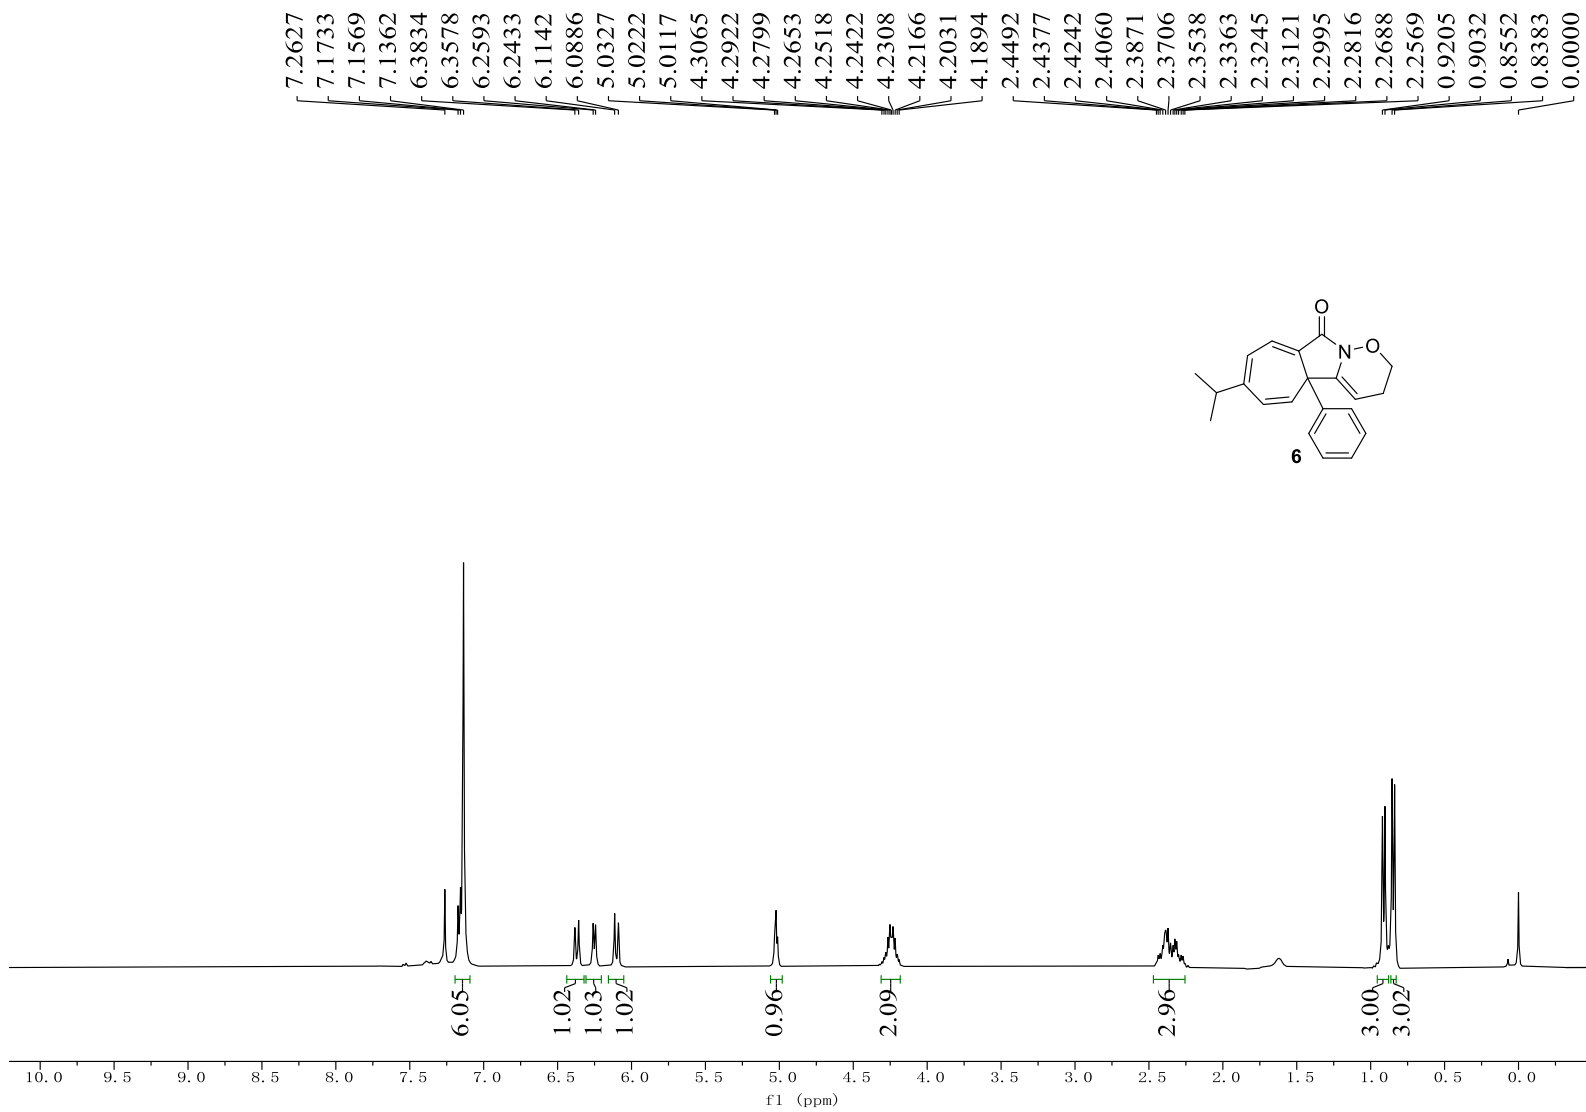

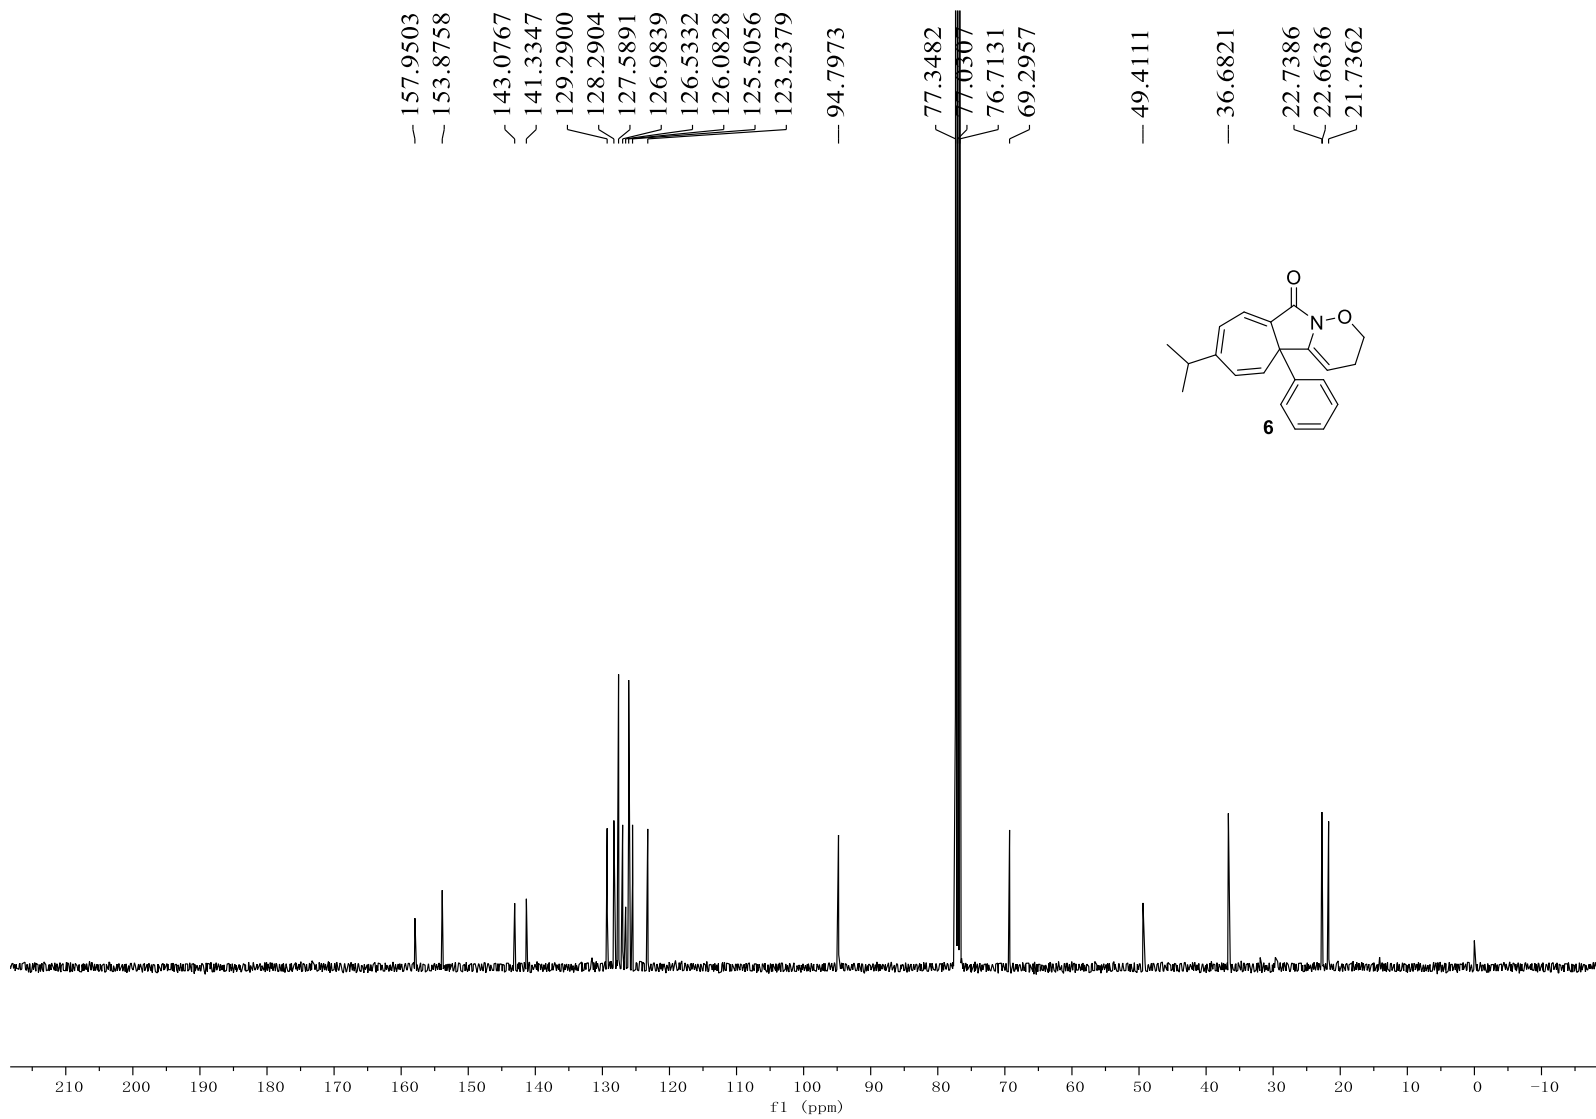

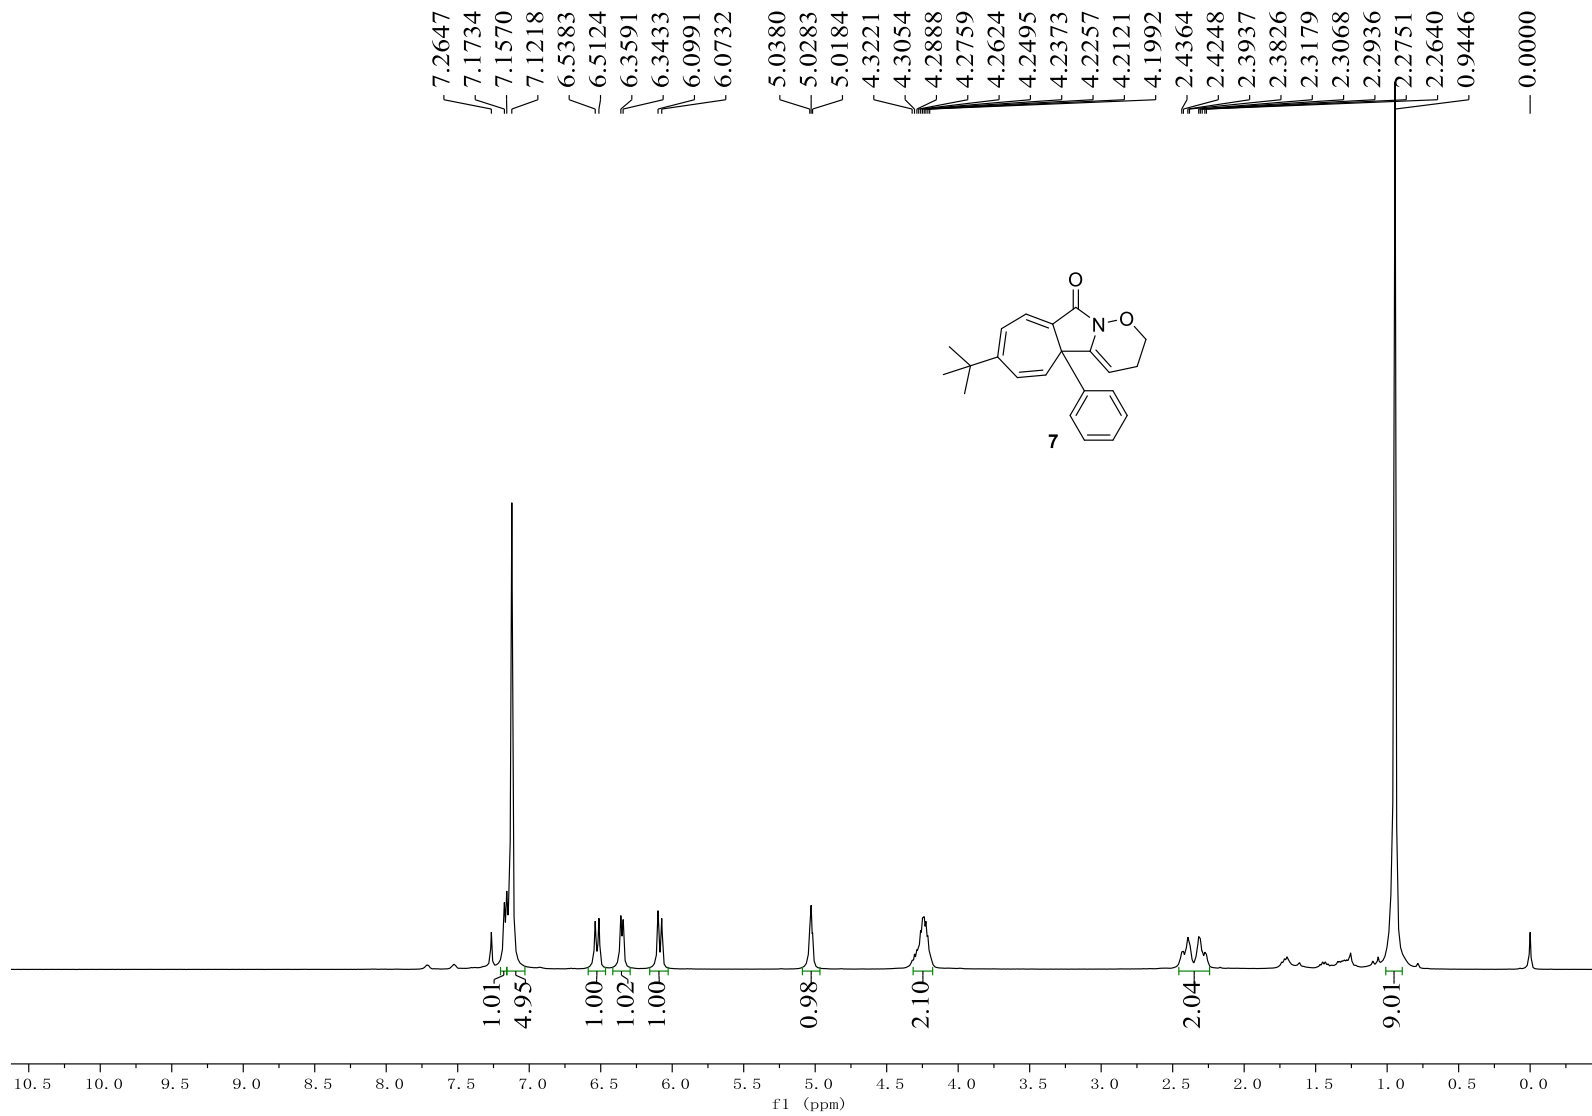

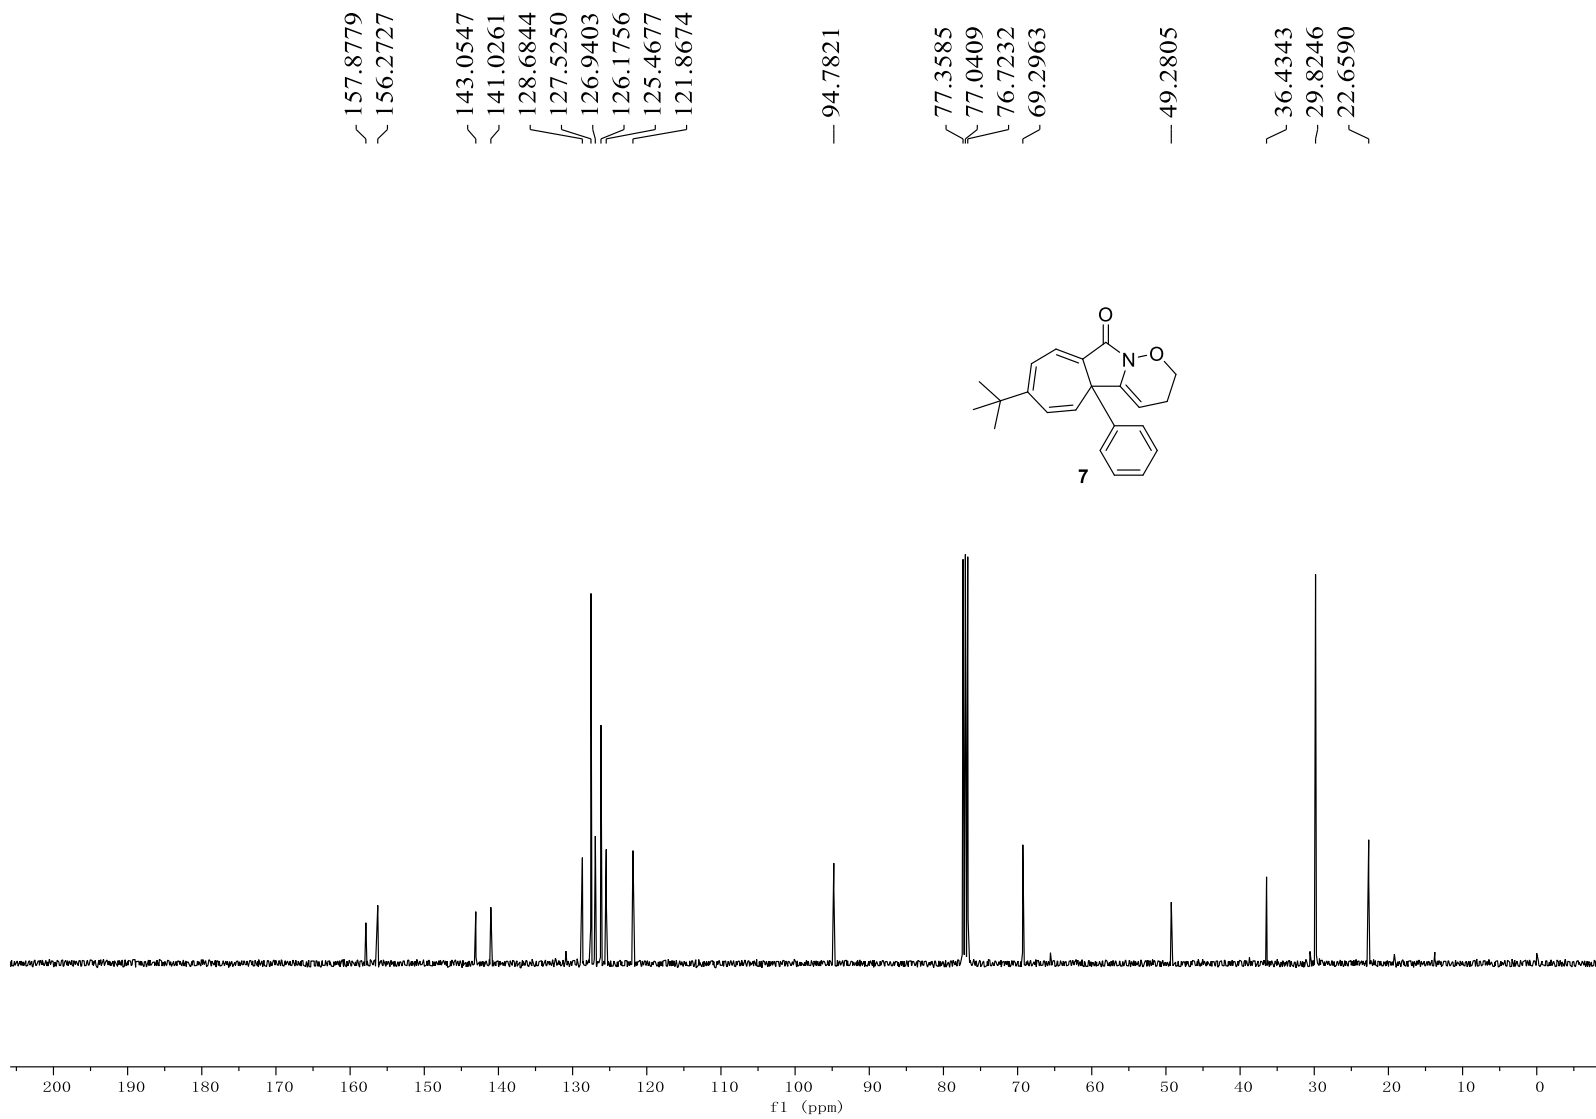

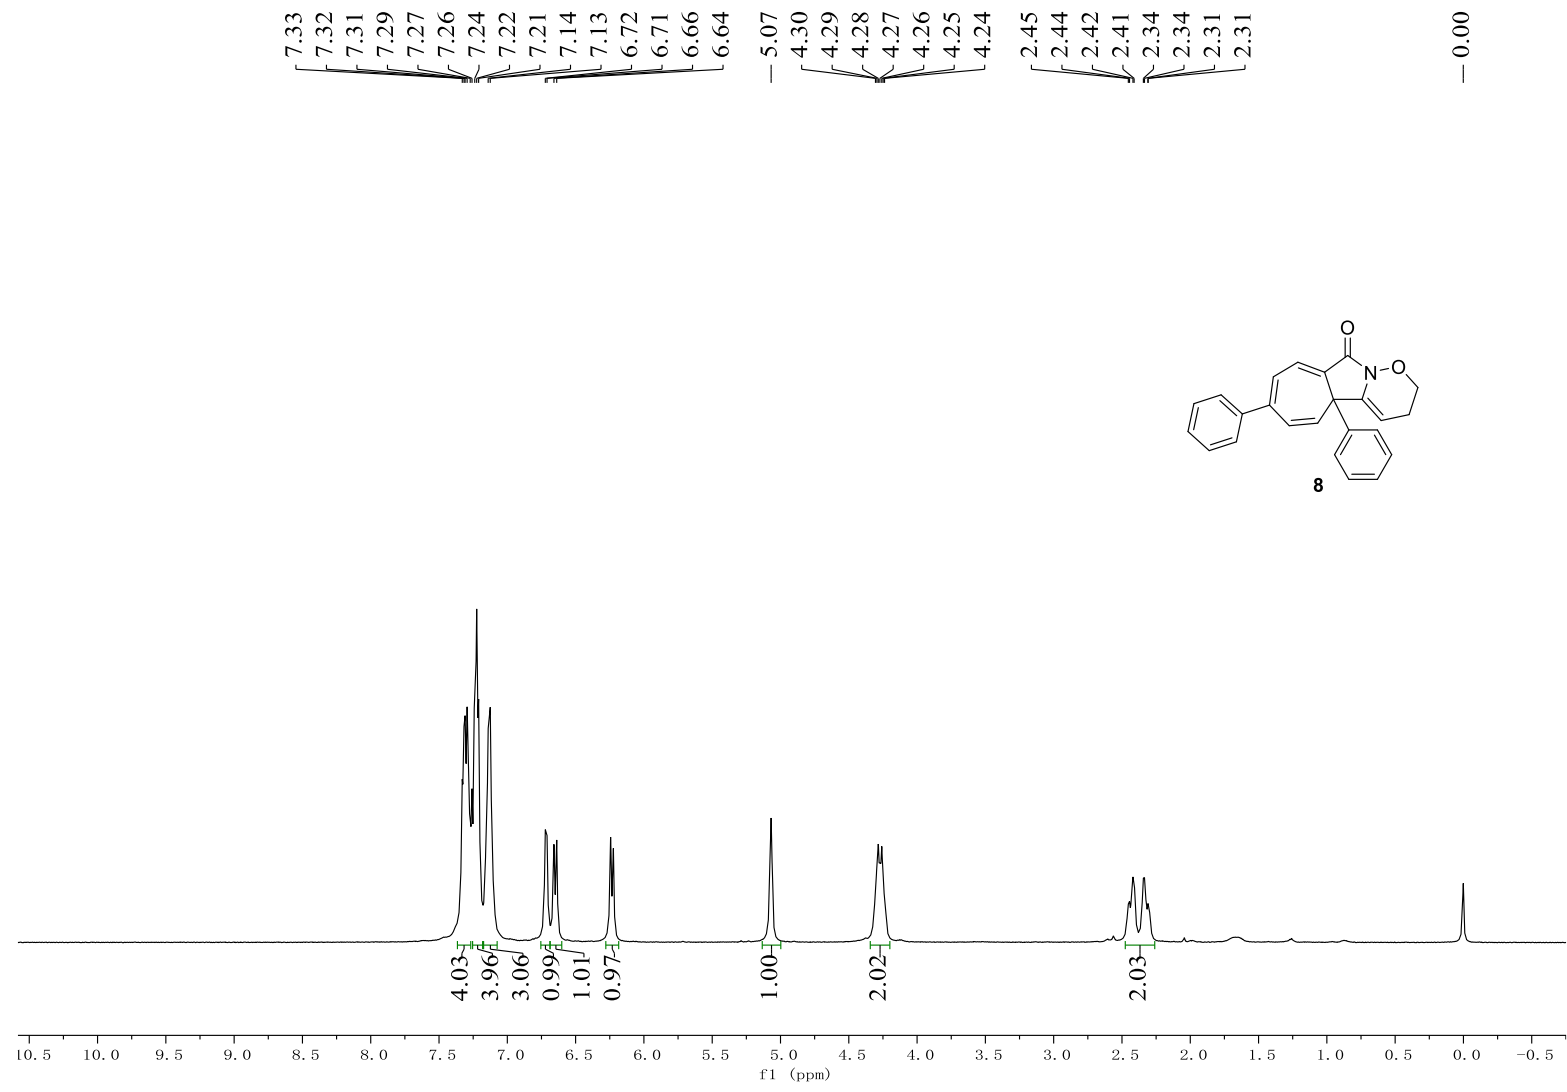

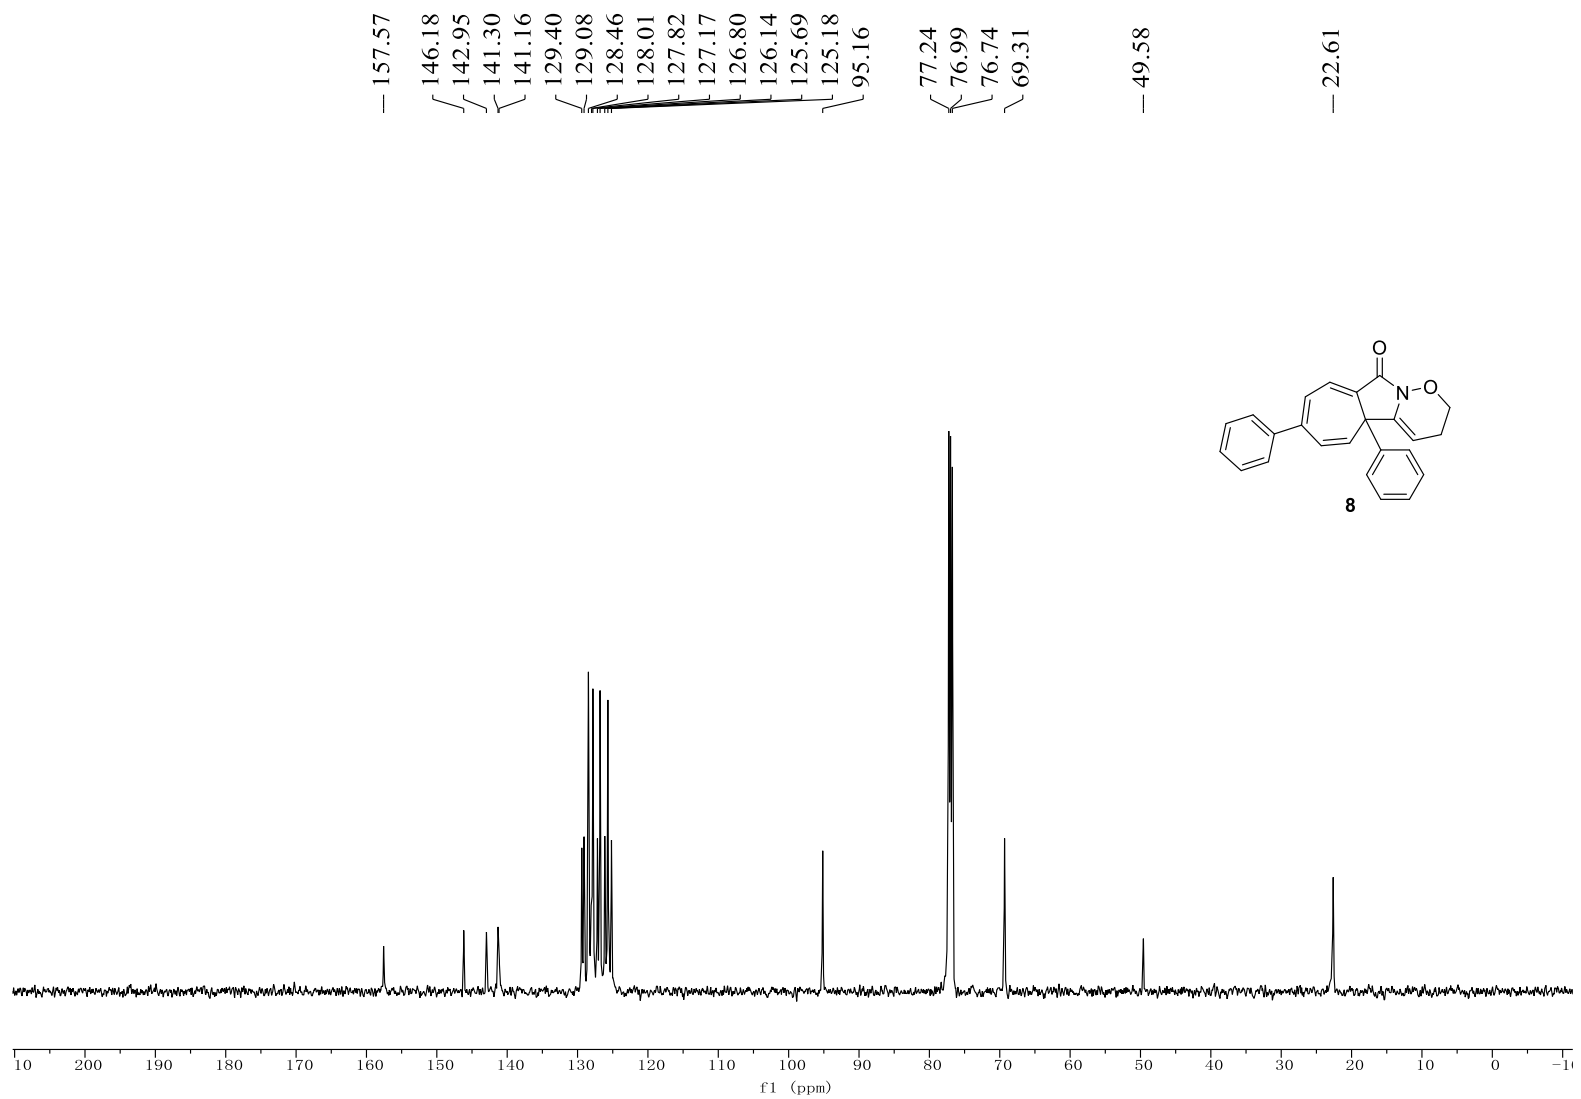



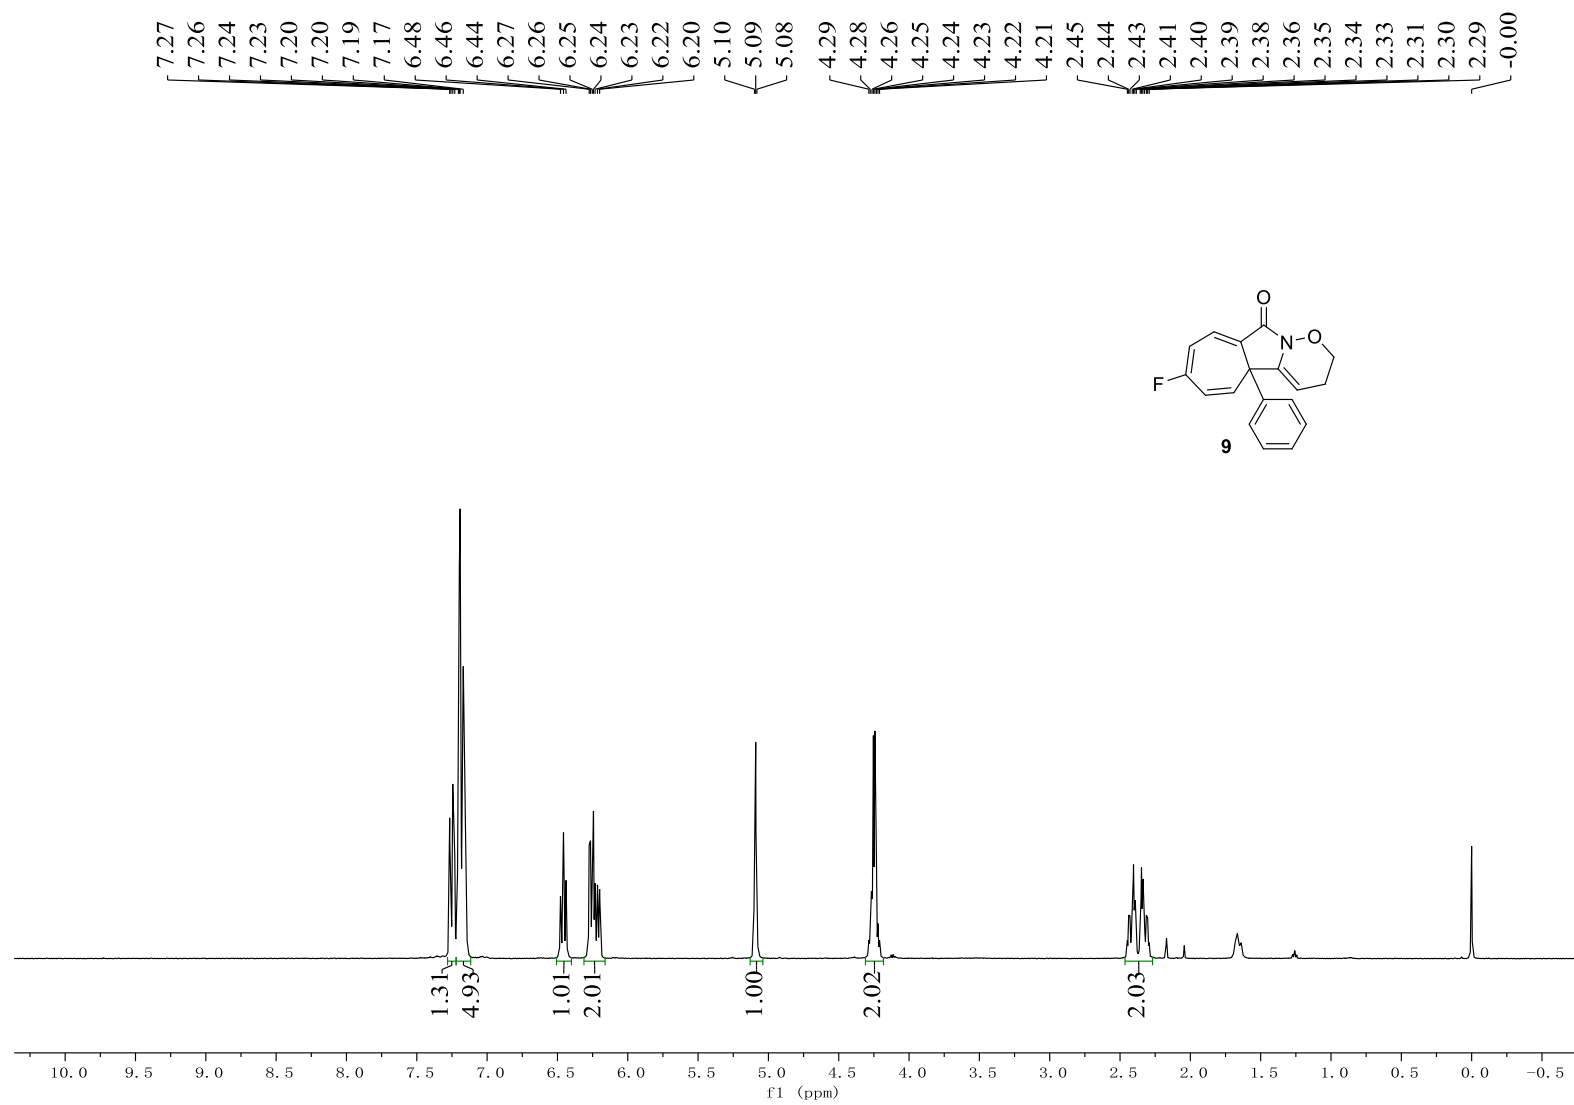

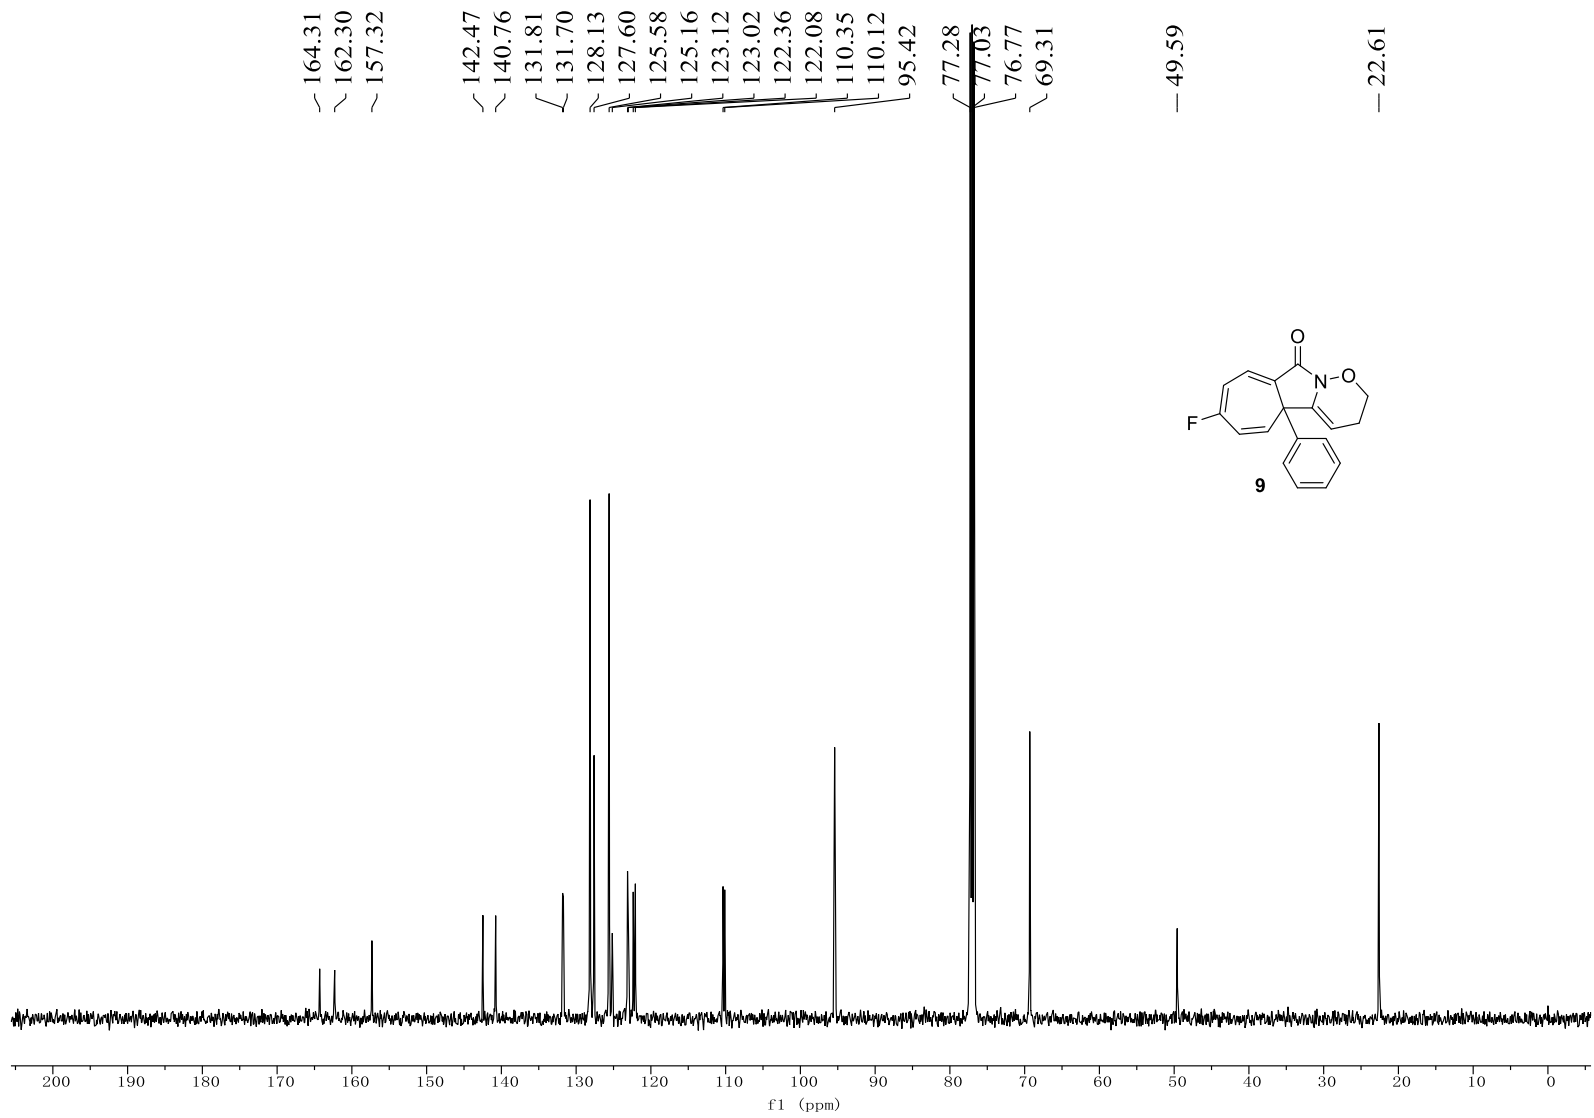

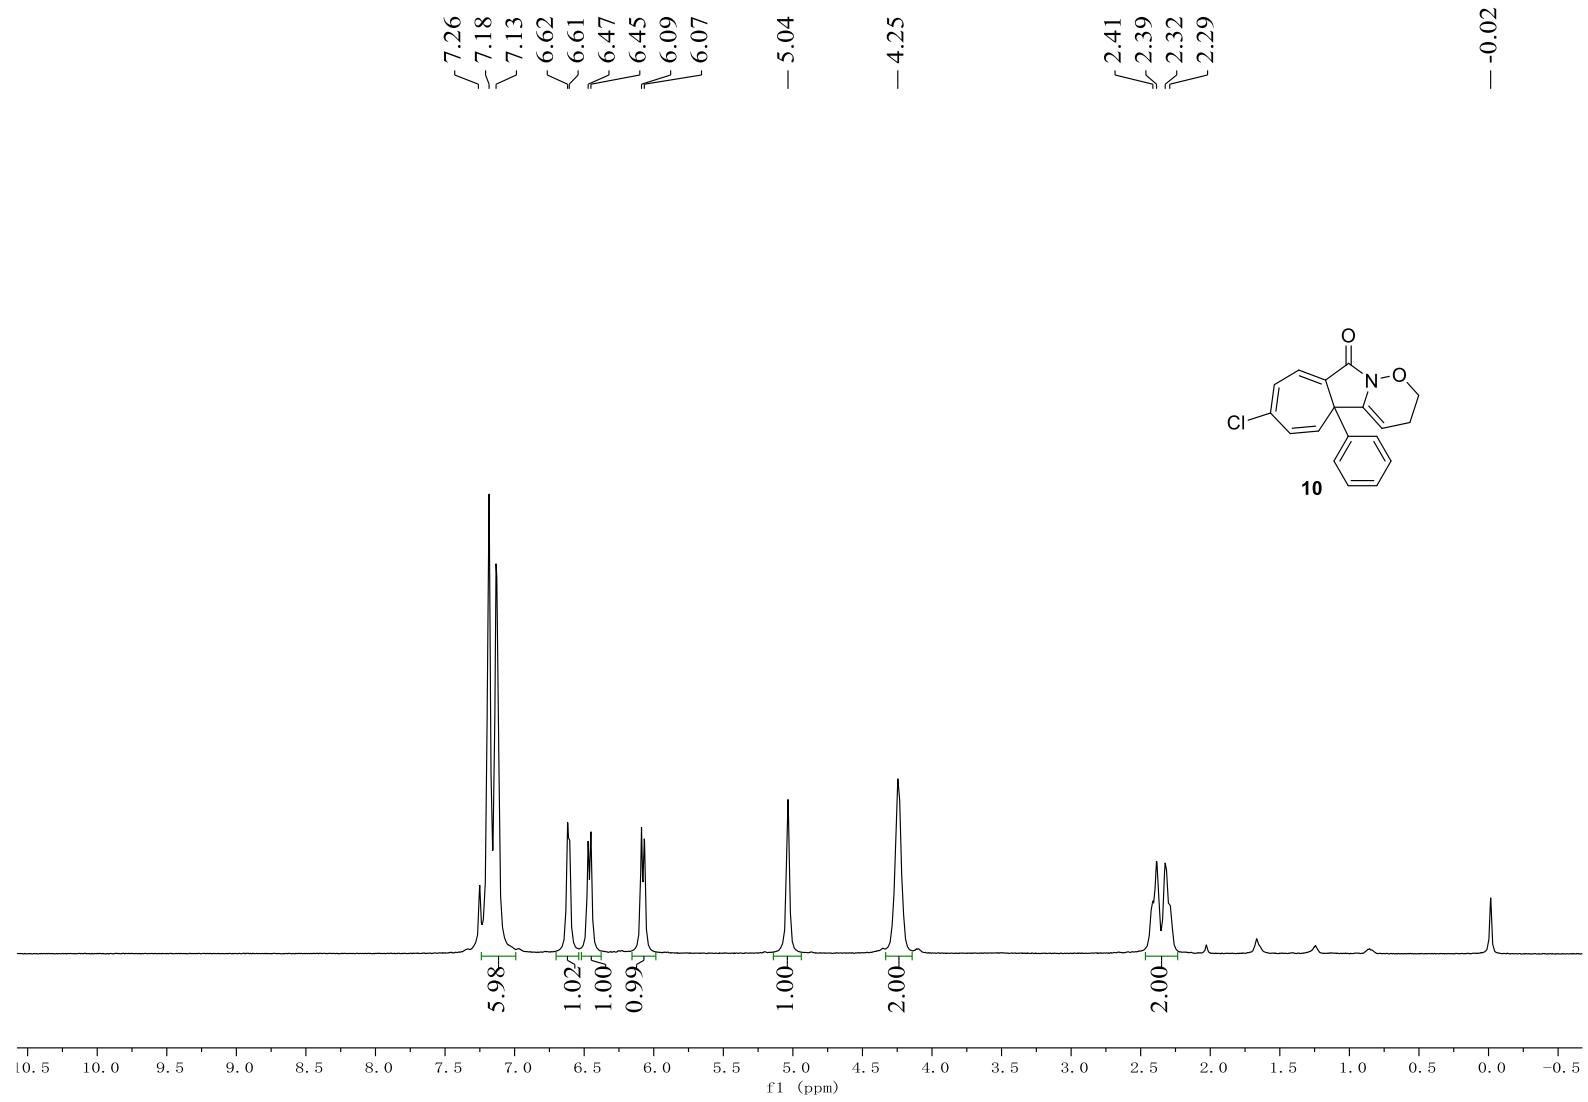

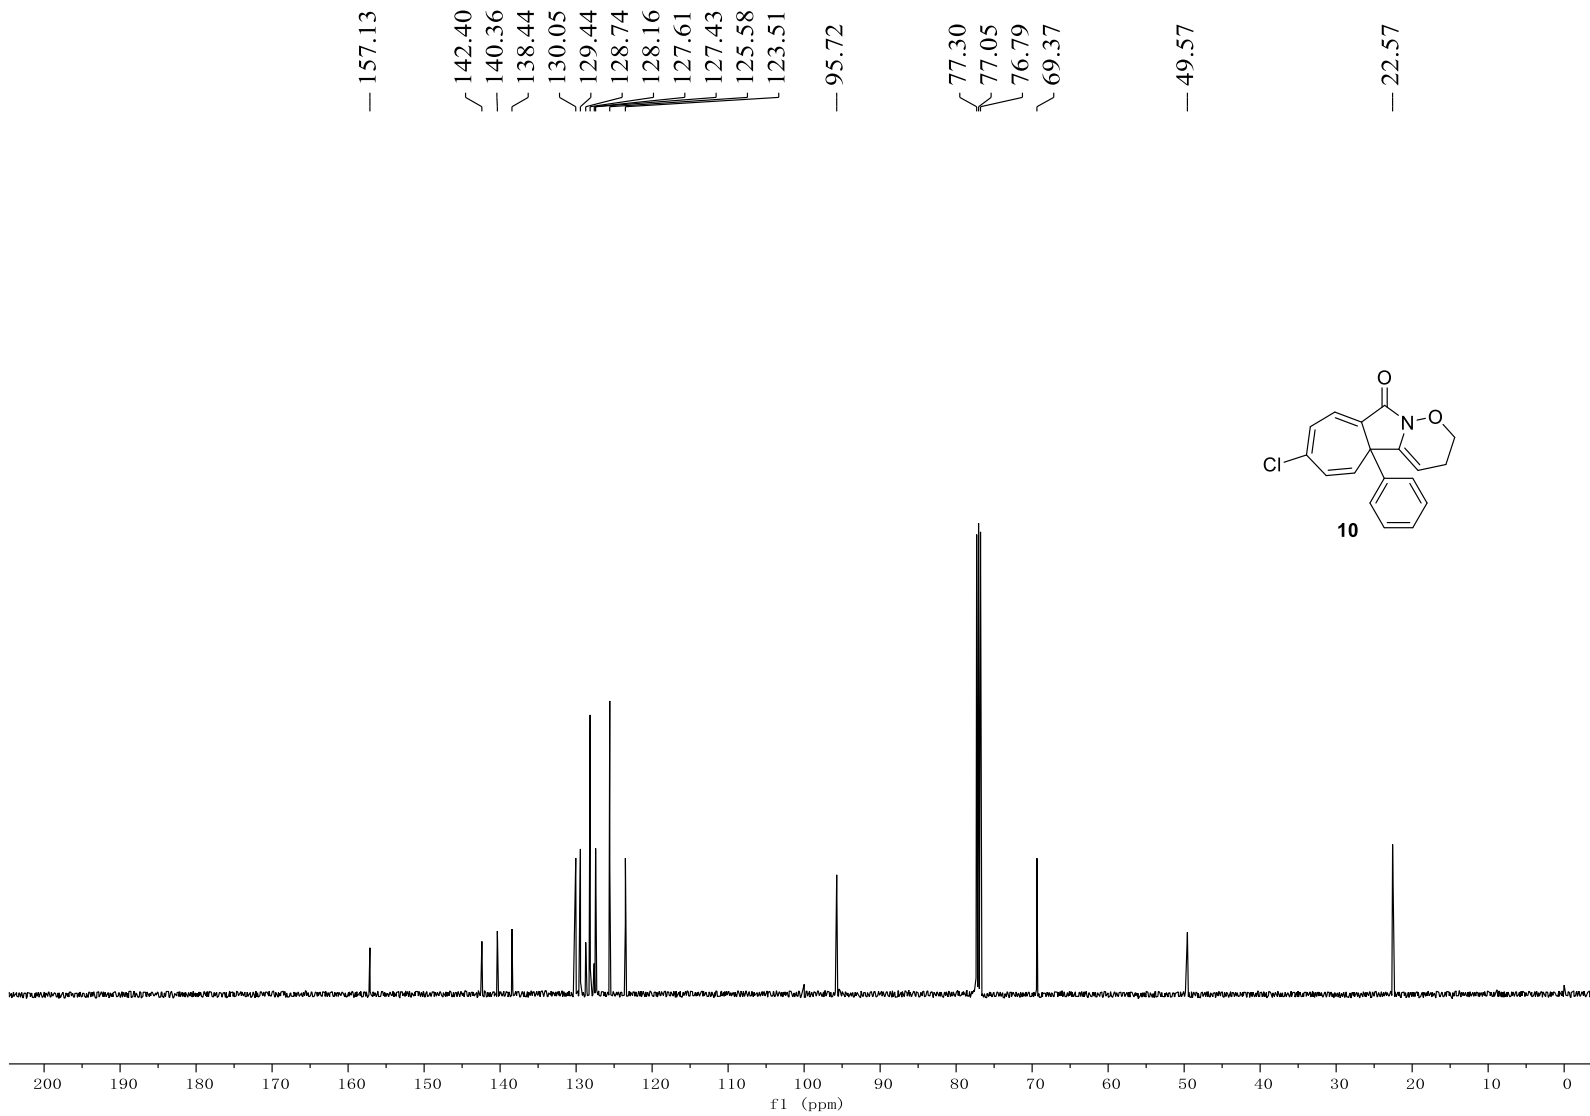

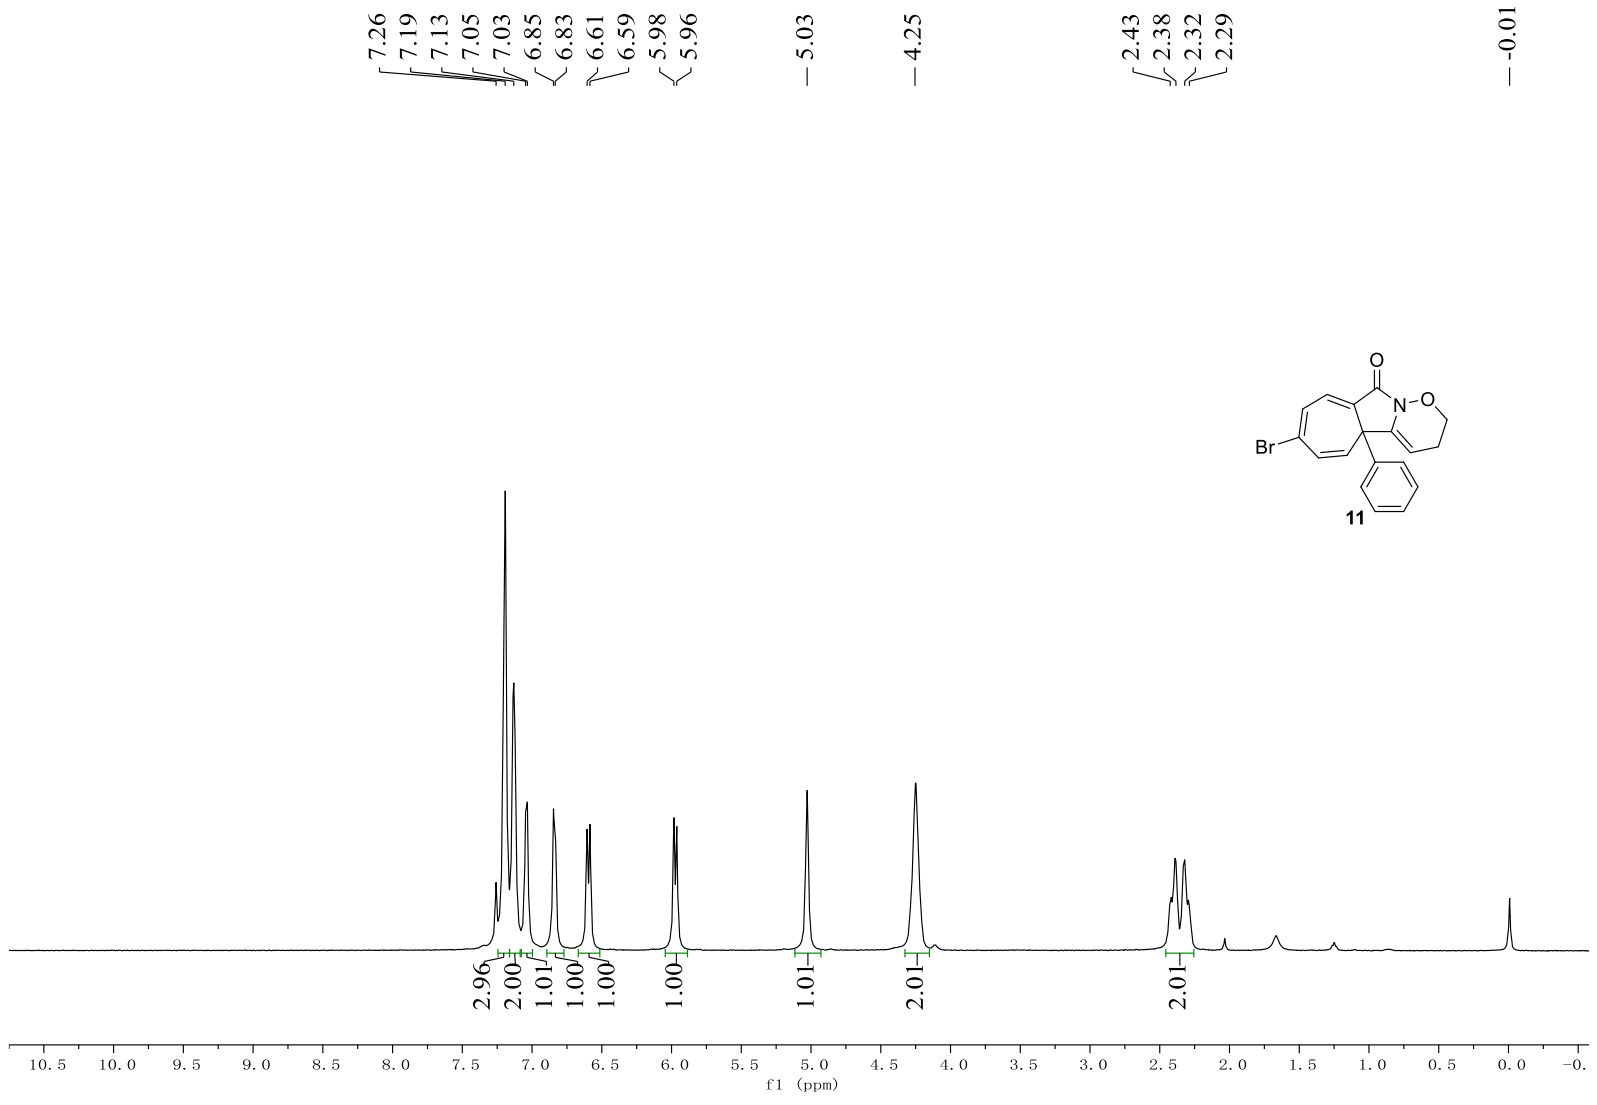

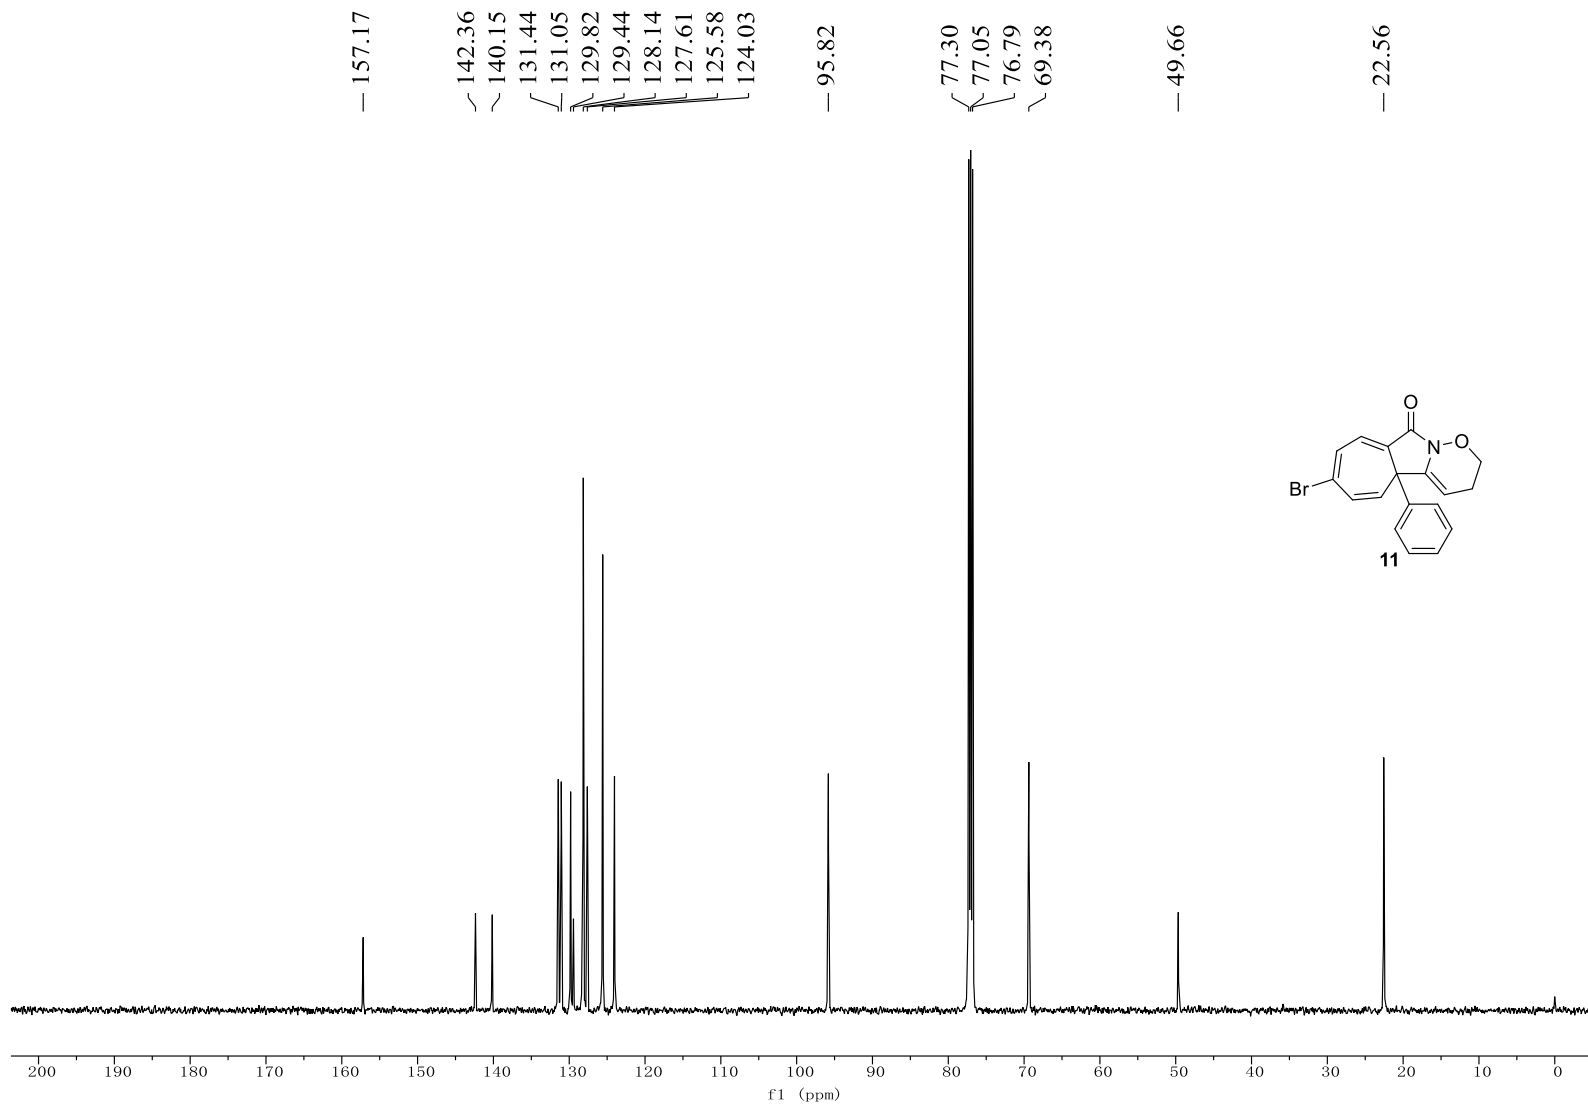

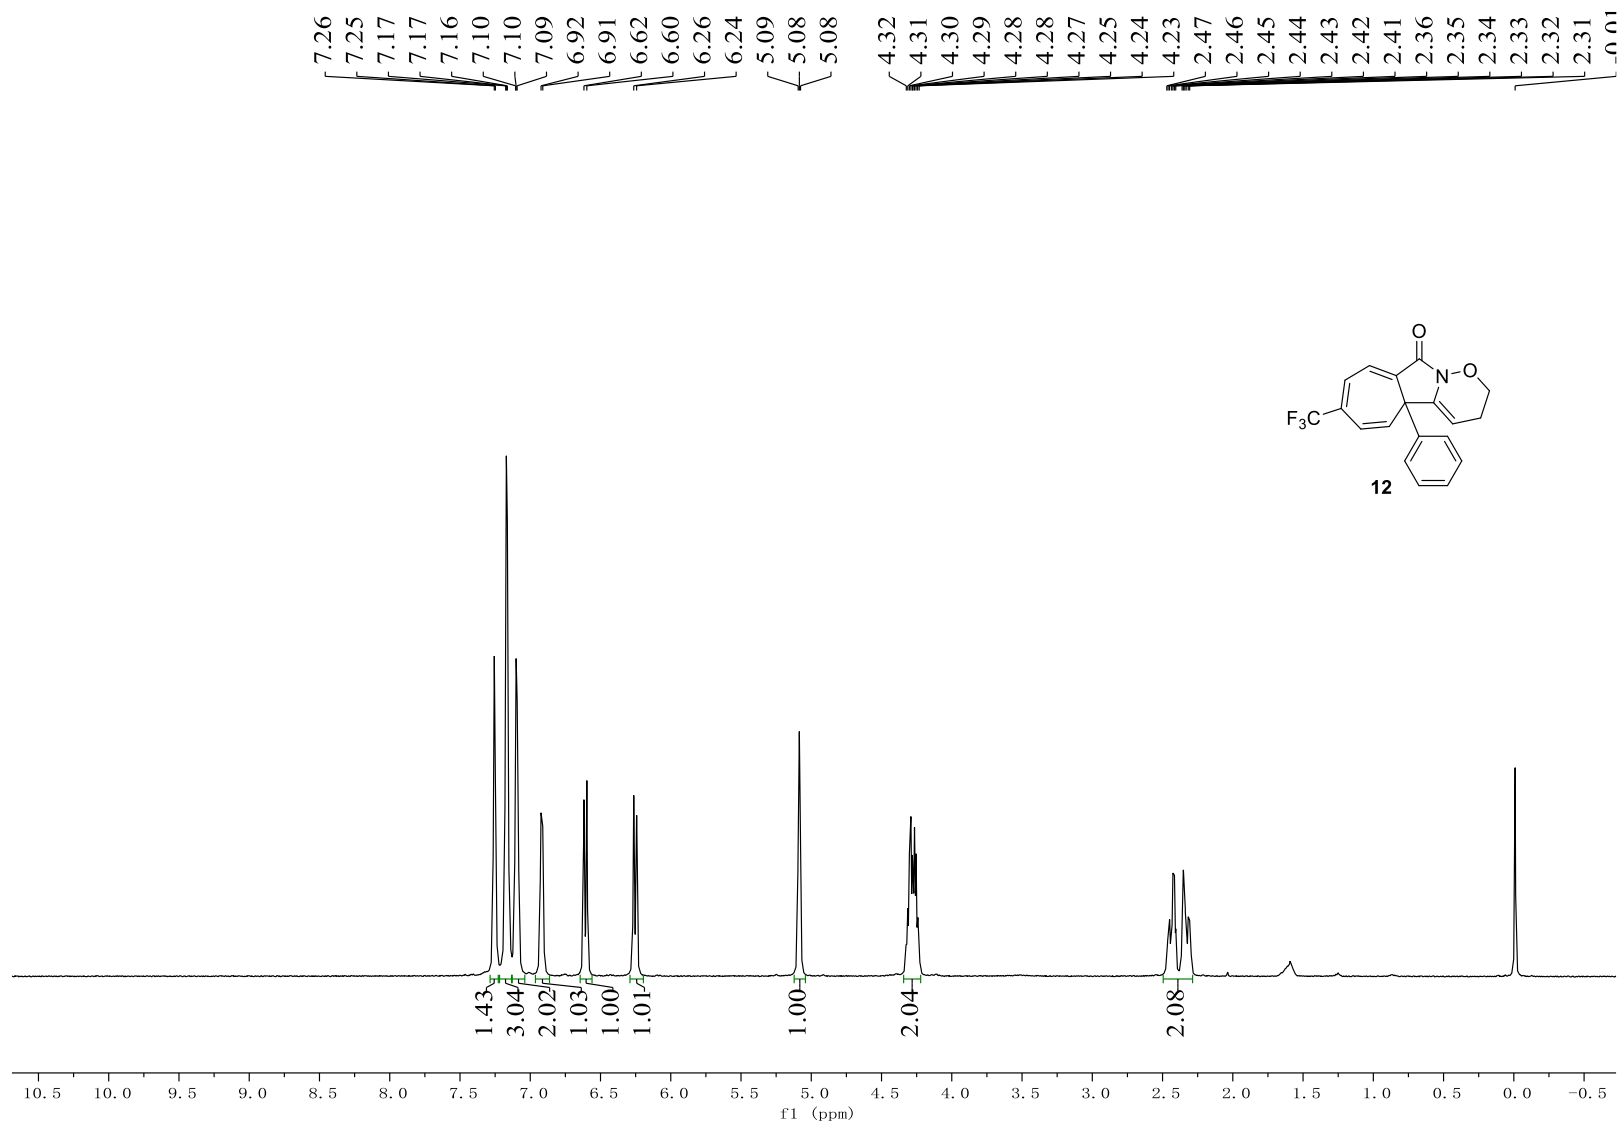

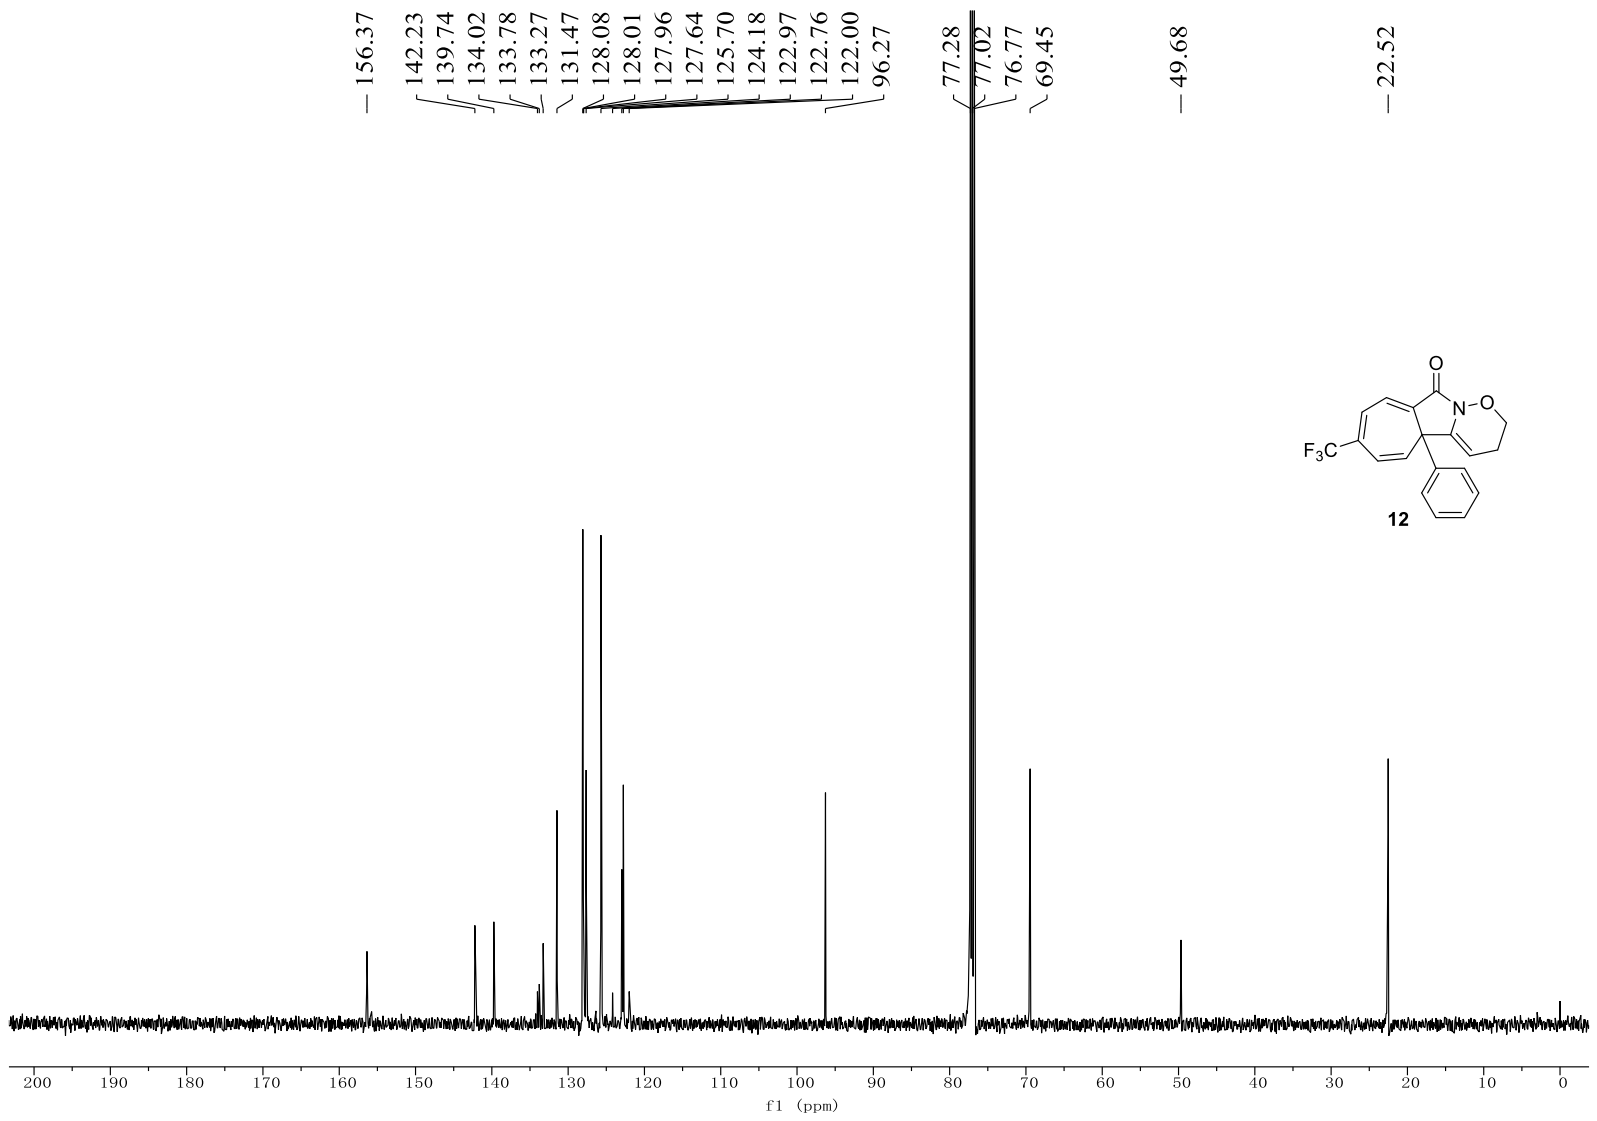



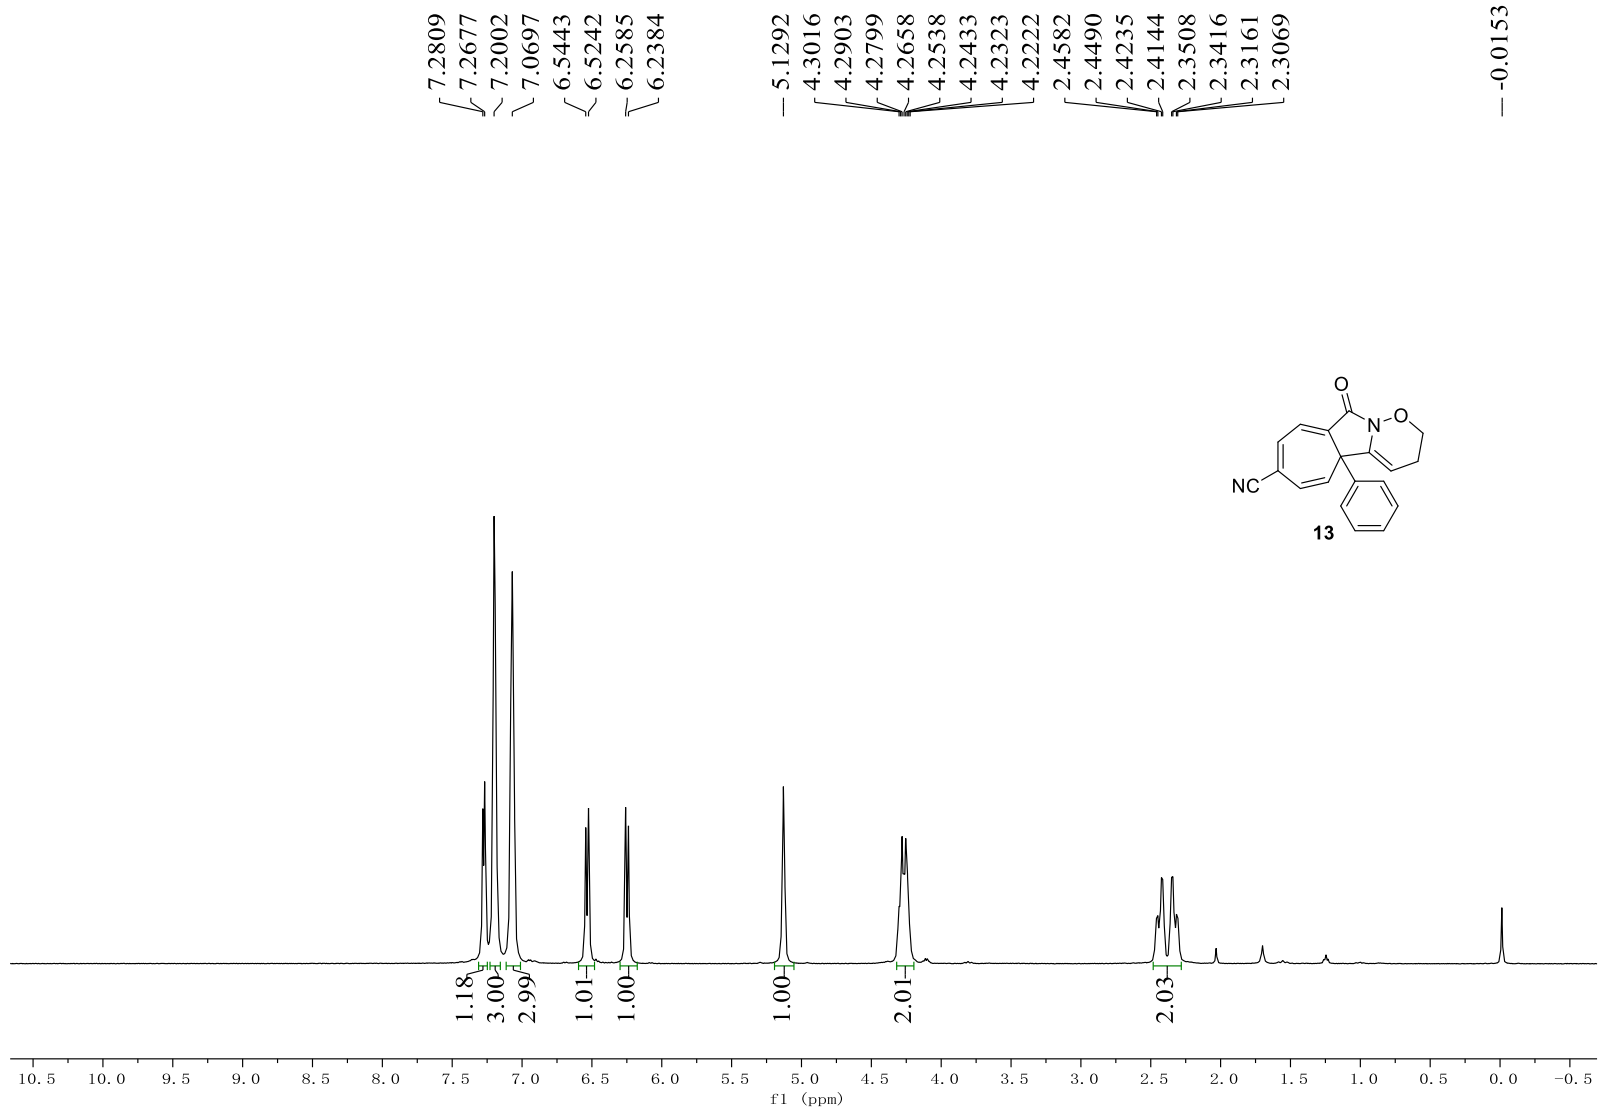

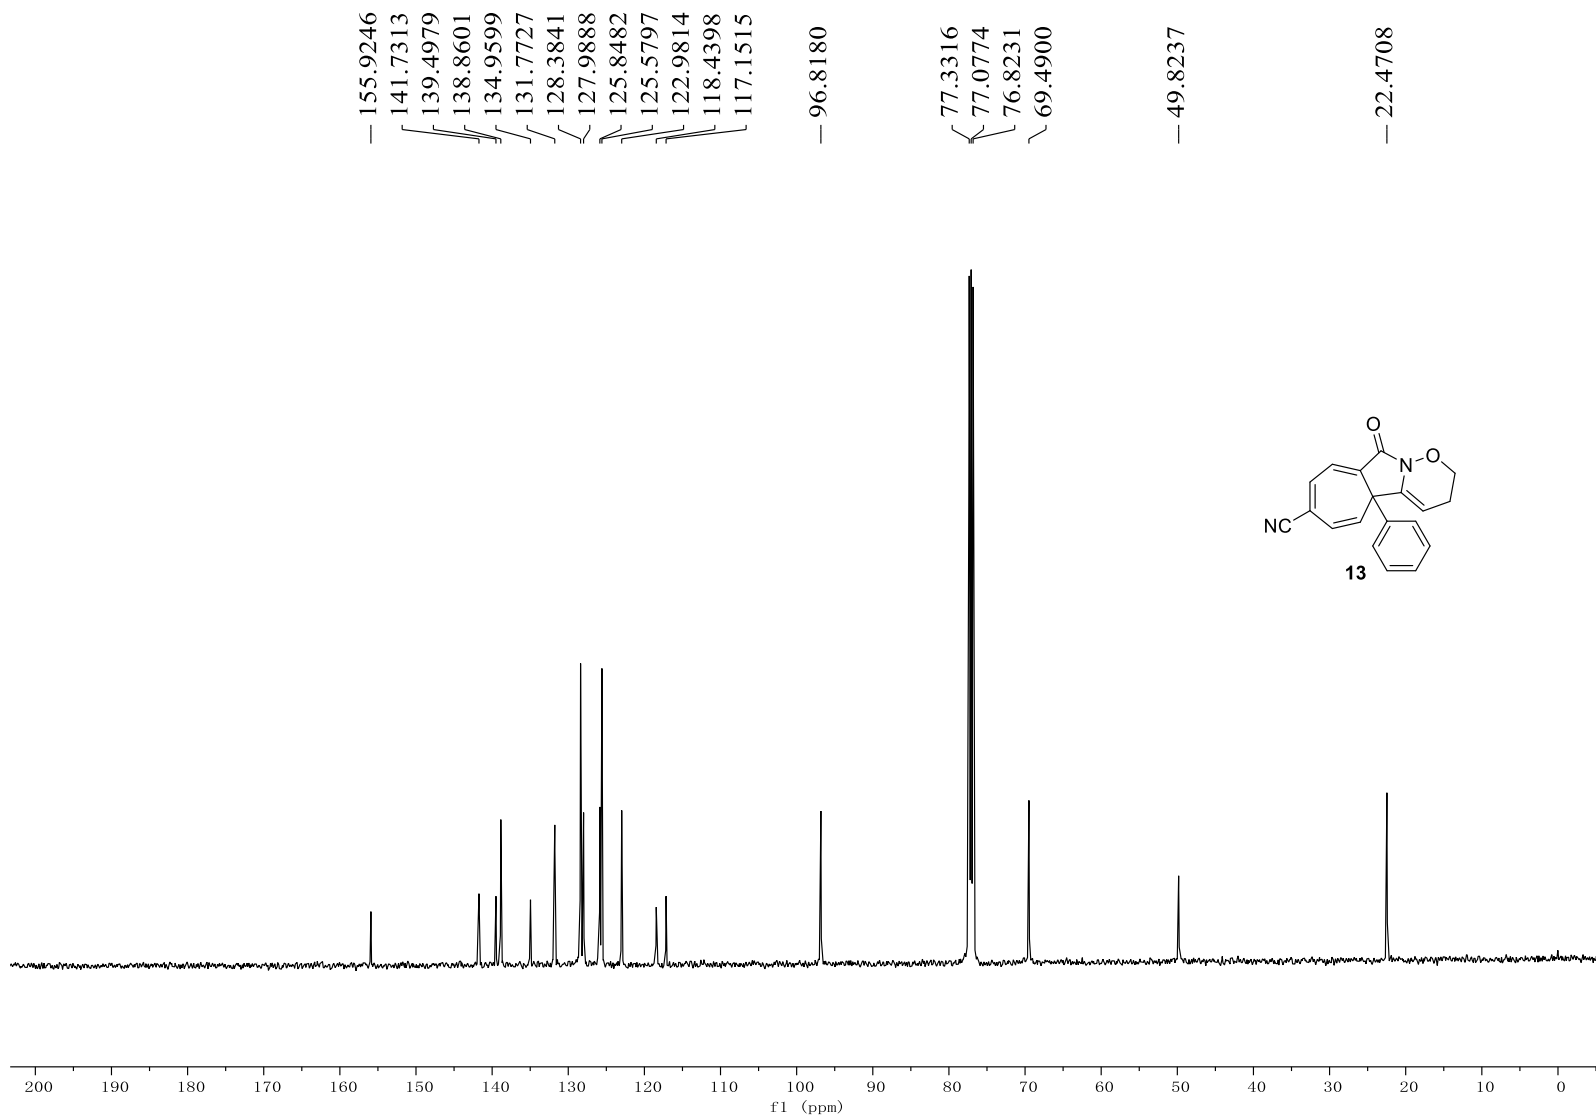

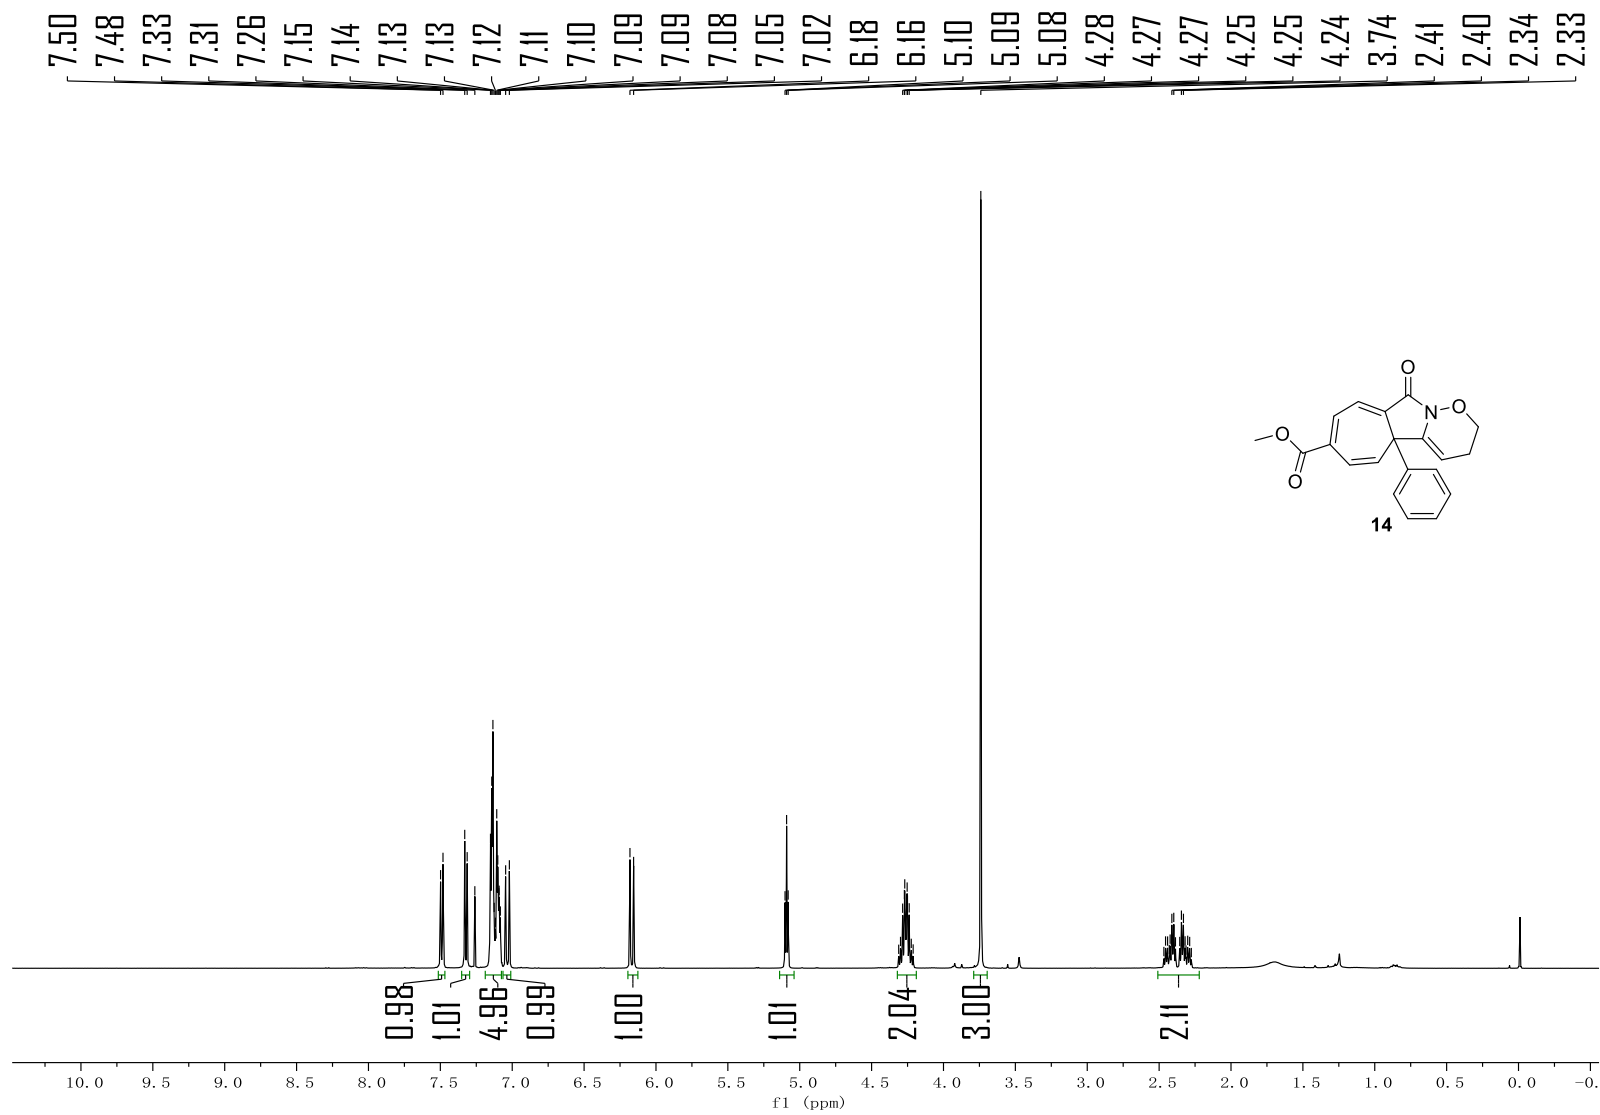

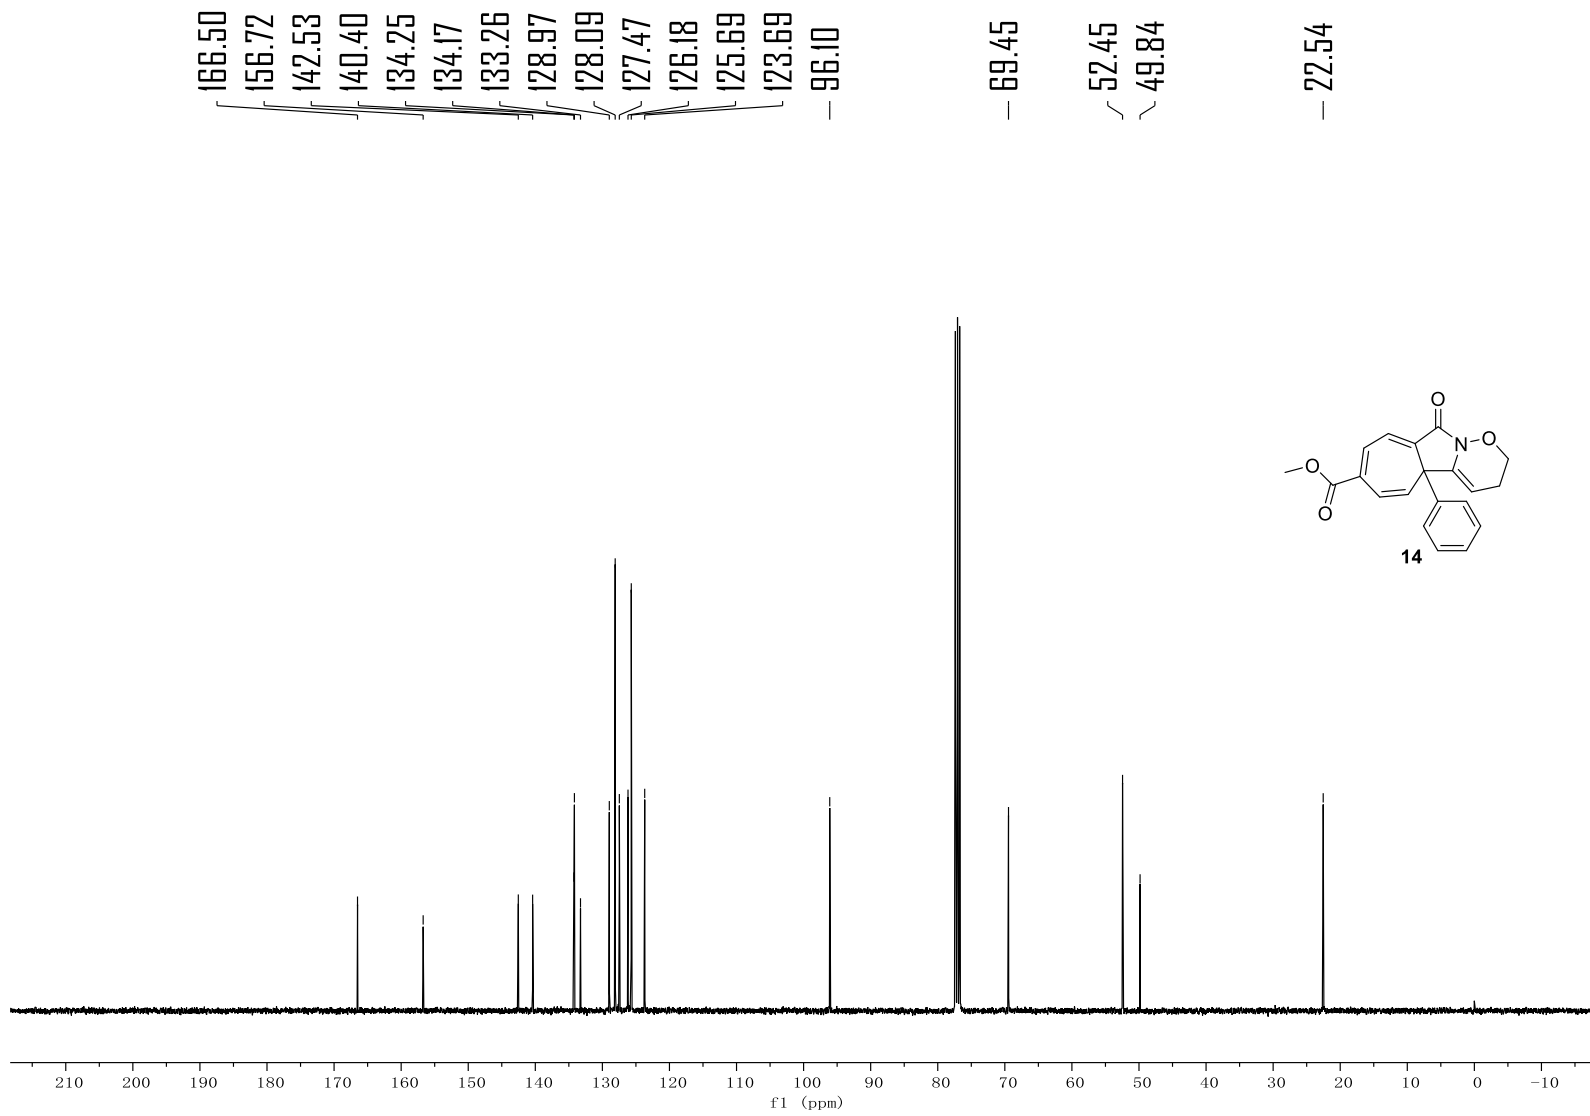

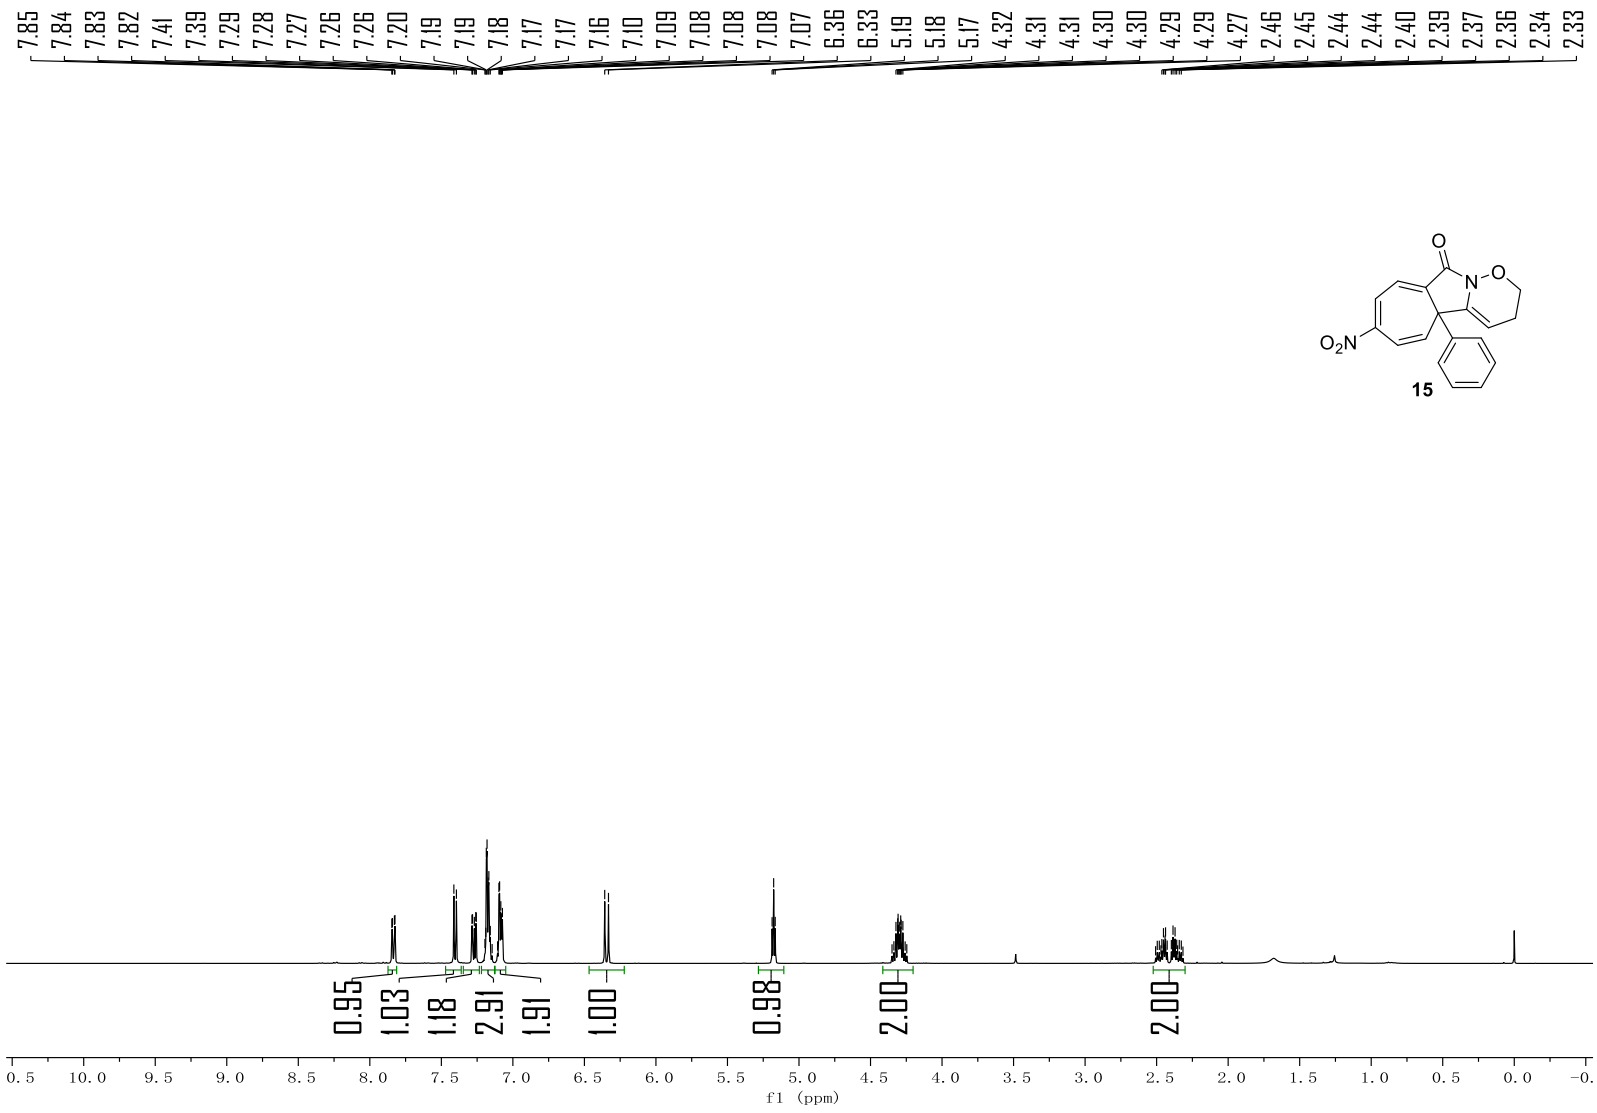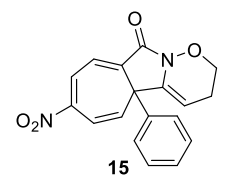

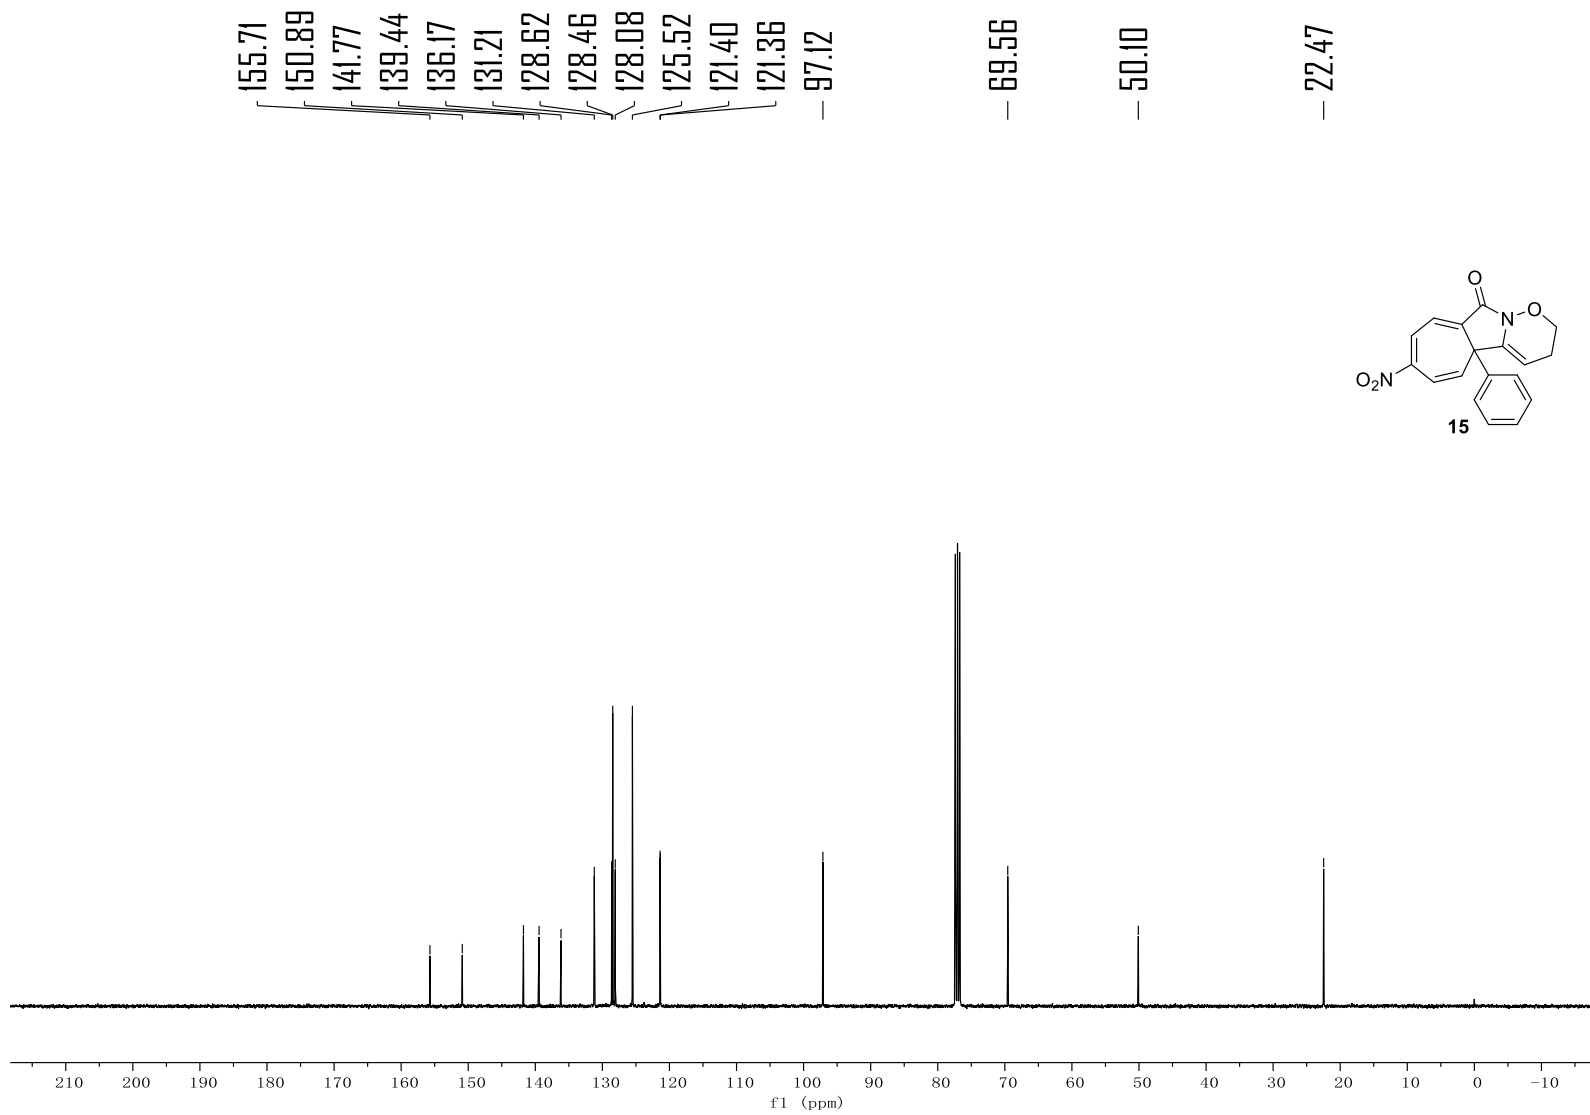

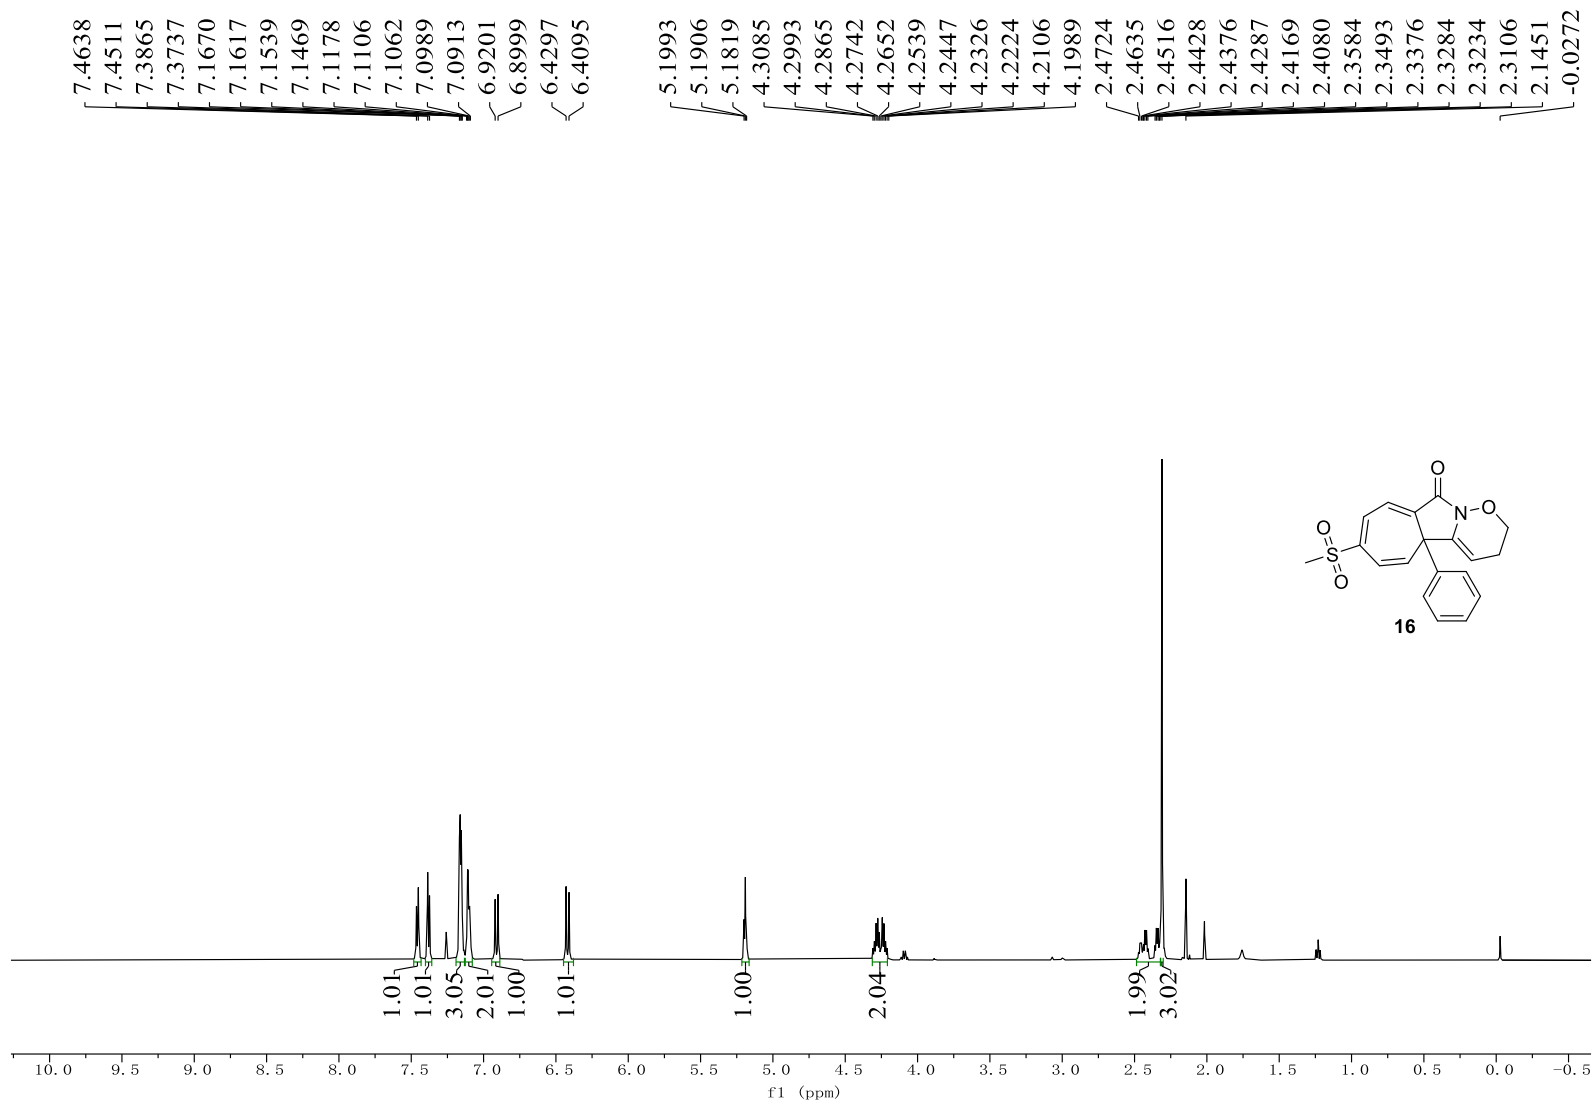

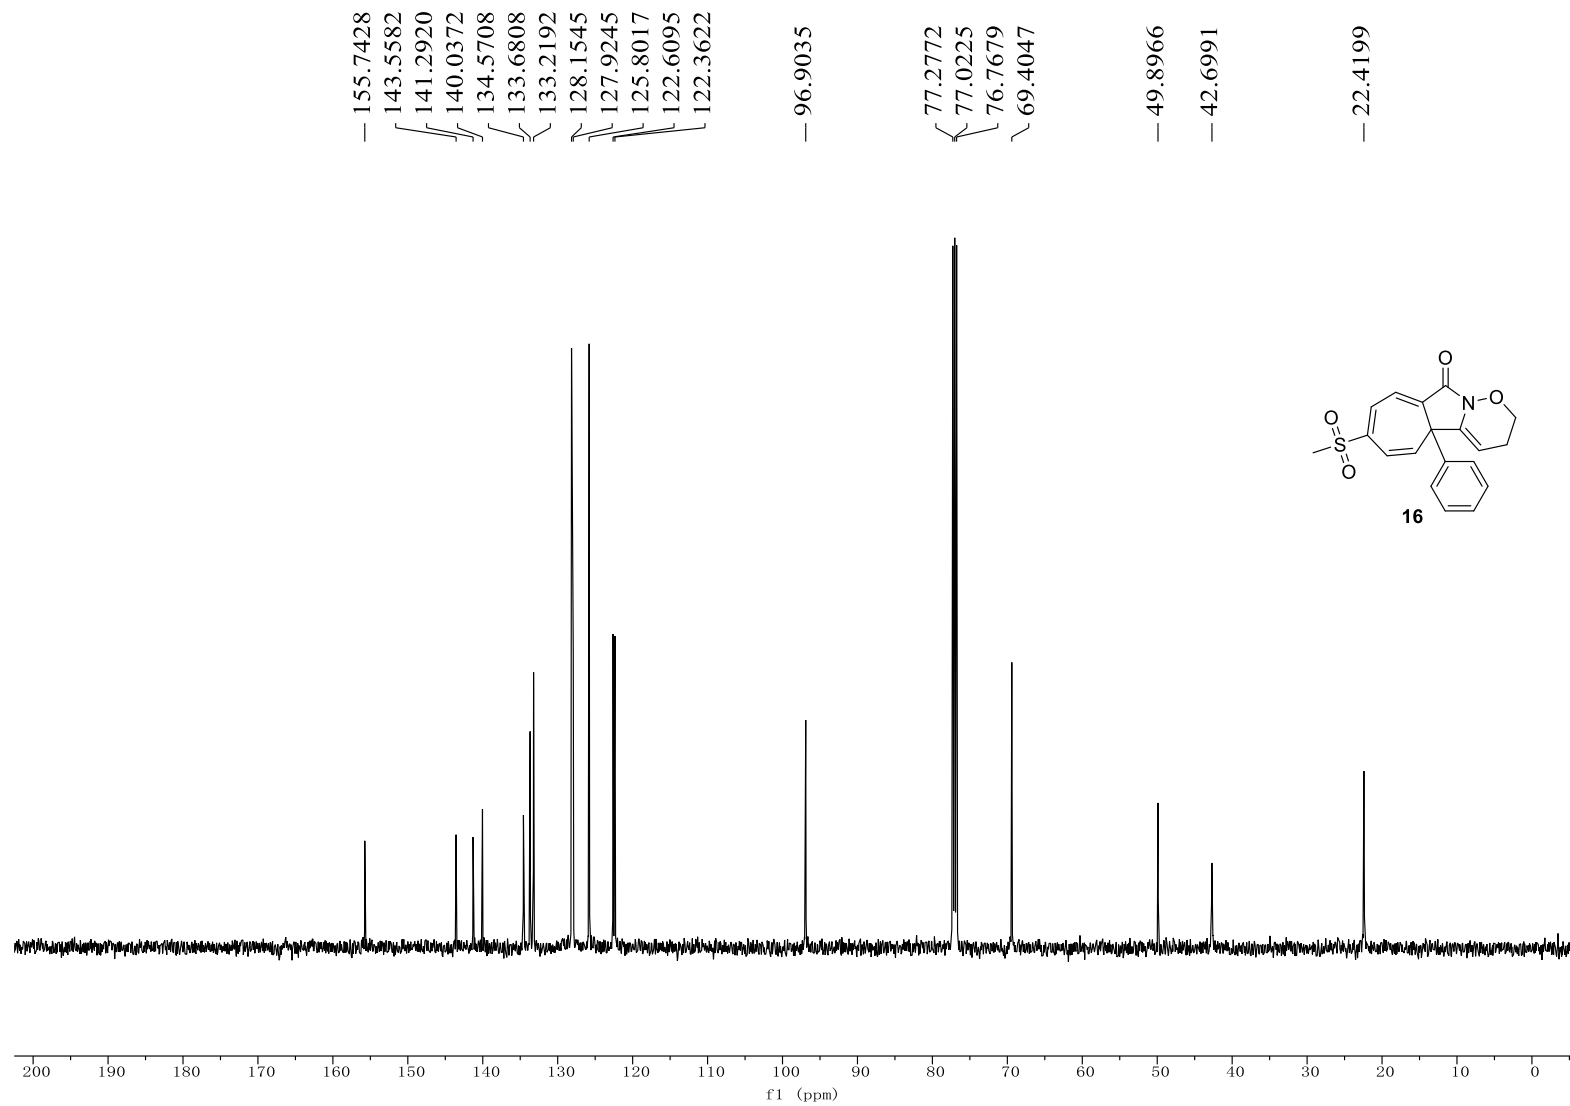



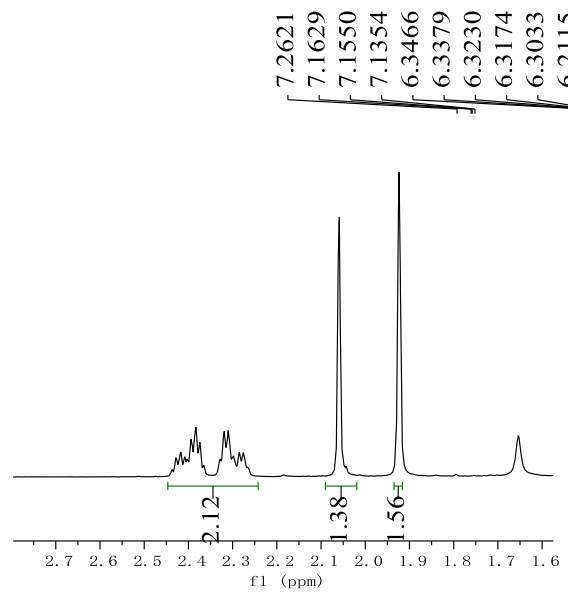

- 7.2621
- 7.1629
- 7.1550
- 7.1354
- 6.3466
- 6.3379
- 6.3230
- 6.3174
- 6.3033
- 6.2115
- 6.1982
- 5.9996
- 5.9796
- 5.8957
- 5.0560
- 5.0475
- 5.0389
- 5.0122
- 5.0036
- 4.9951
- 4.2771
- 4.2709
- 4.2604
- 4.2487
- 4.2358
- 4.2263
- 4.2162
- 4.2042
- 4.1947
- 2.4284
- 2.4175
- 2.4083
- 2.3940
- 2.3831
- 2.3742
- 2.3280
- 2.3191
- 2.3100
- 2.2848
- 2.2757
- 2.0586
- 1.9234

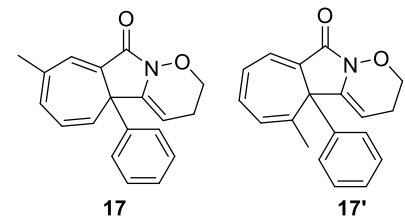

17 : 17' = 25:22

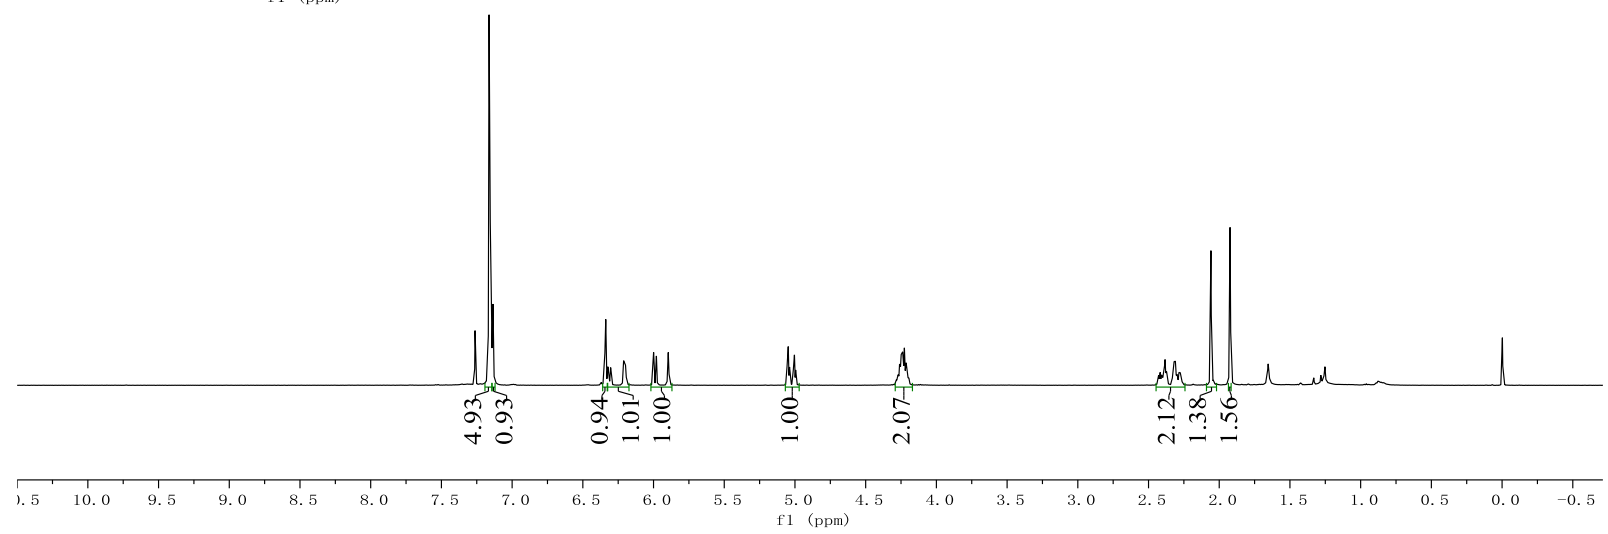

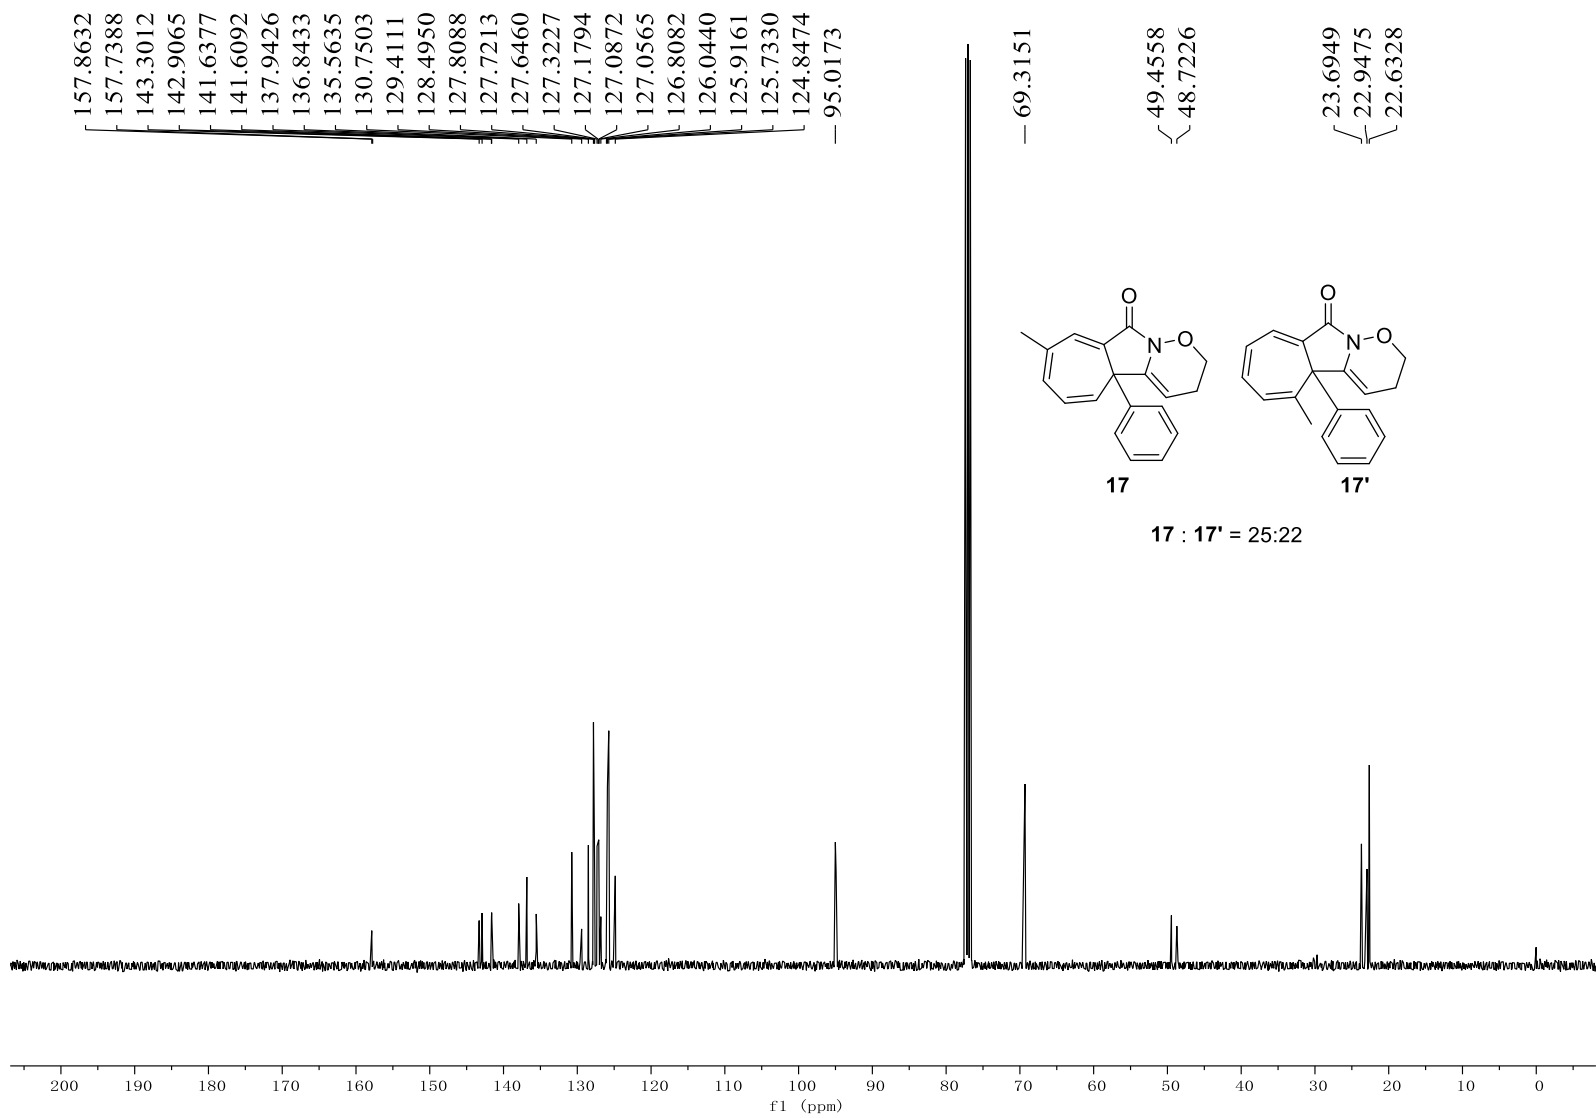

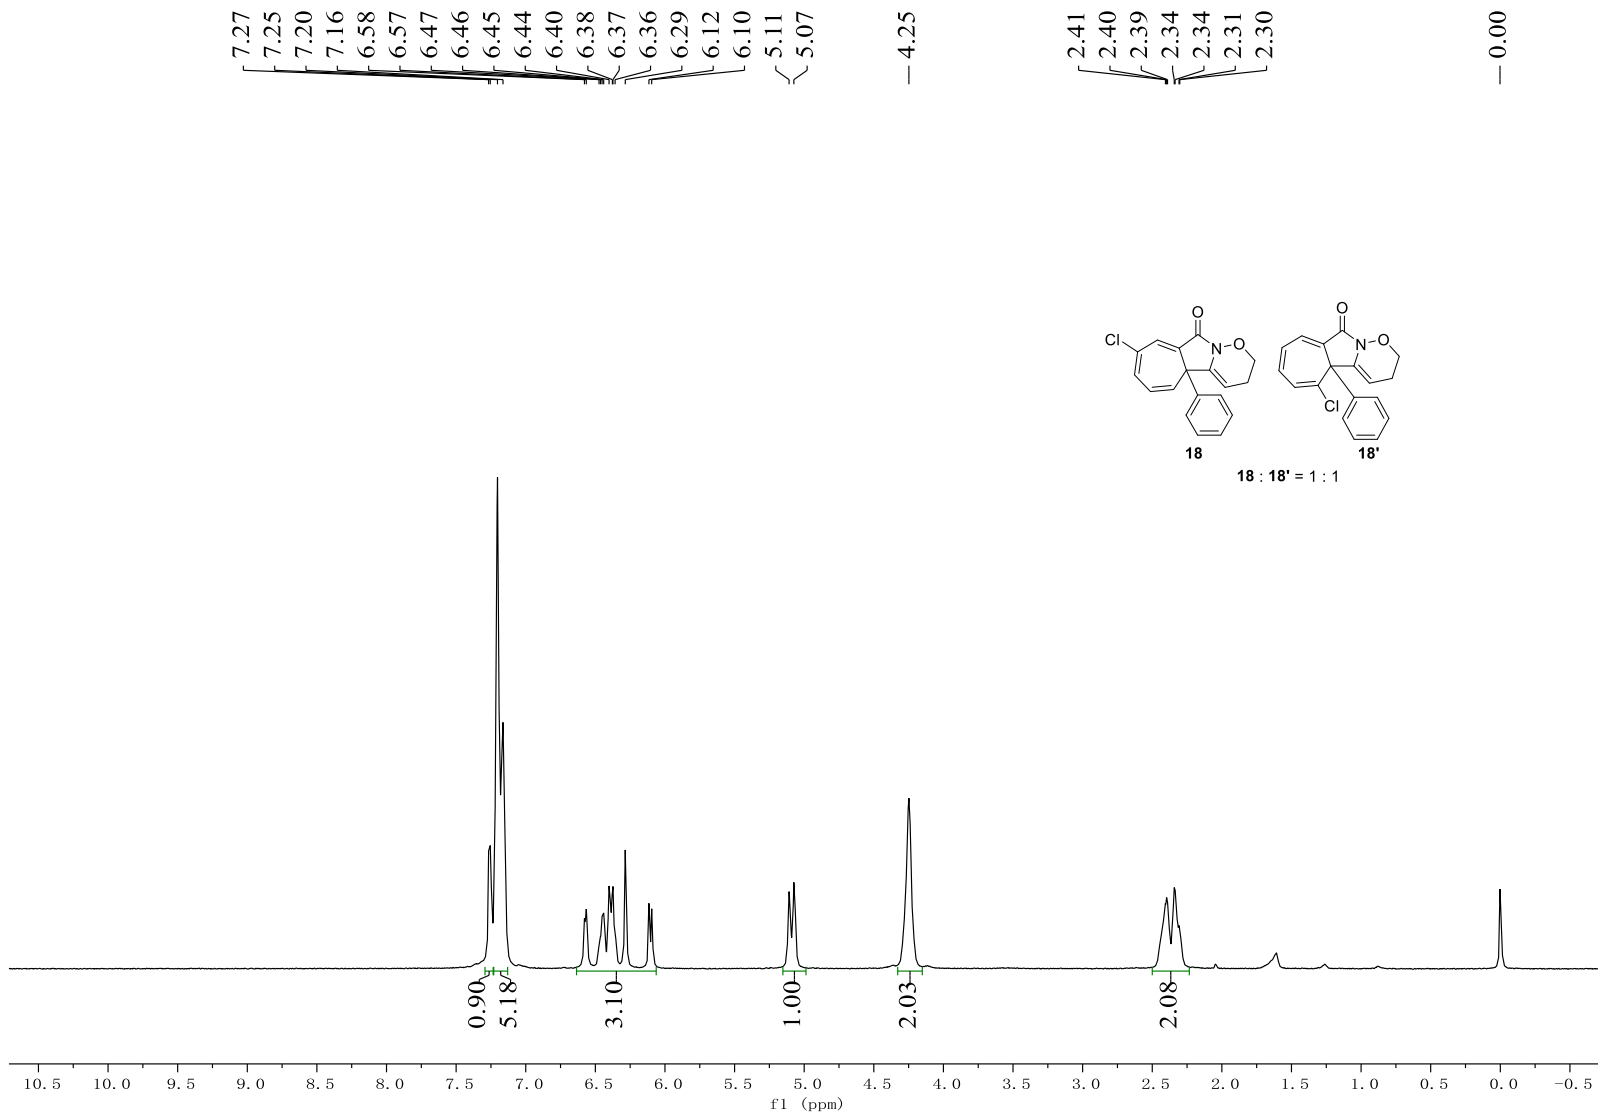

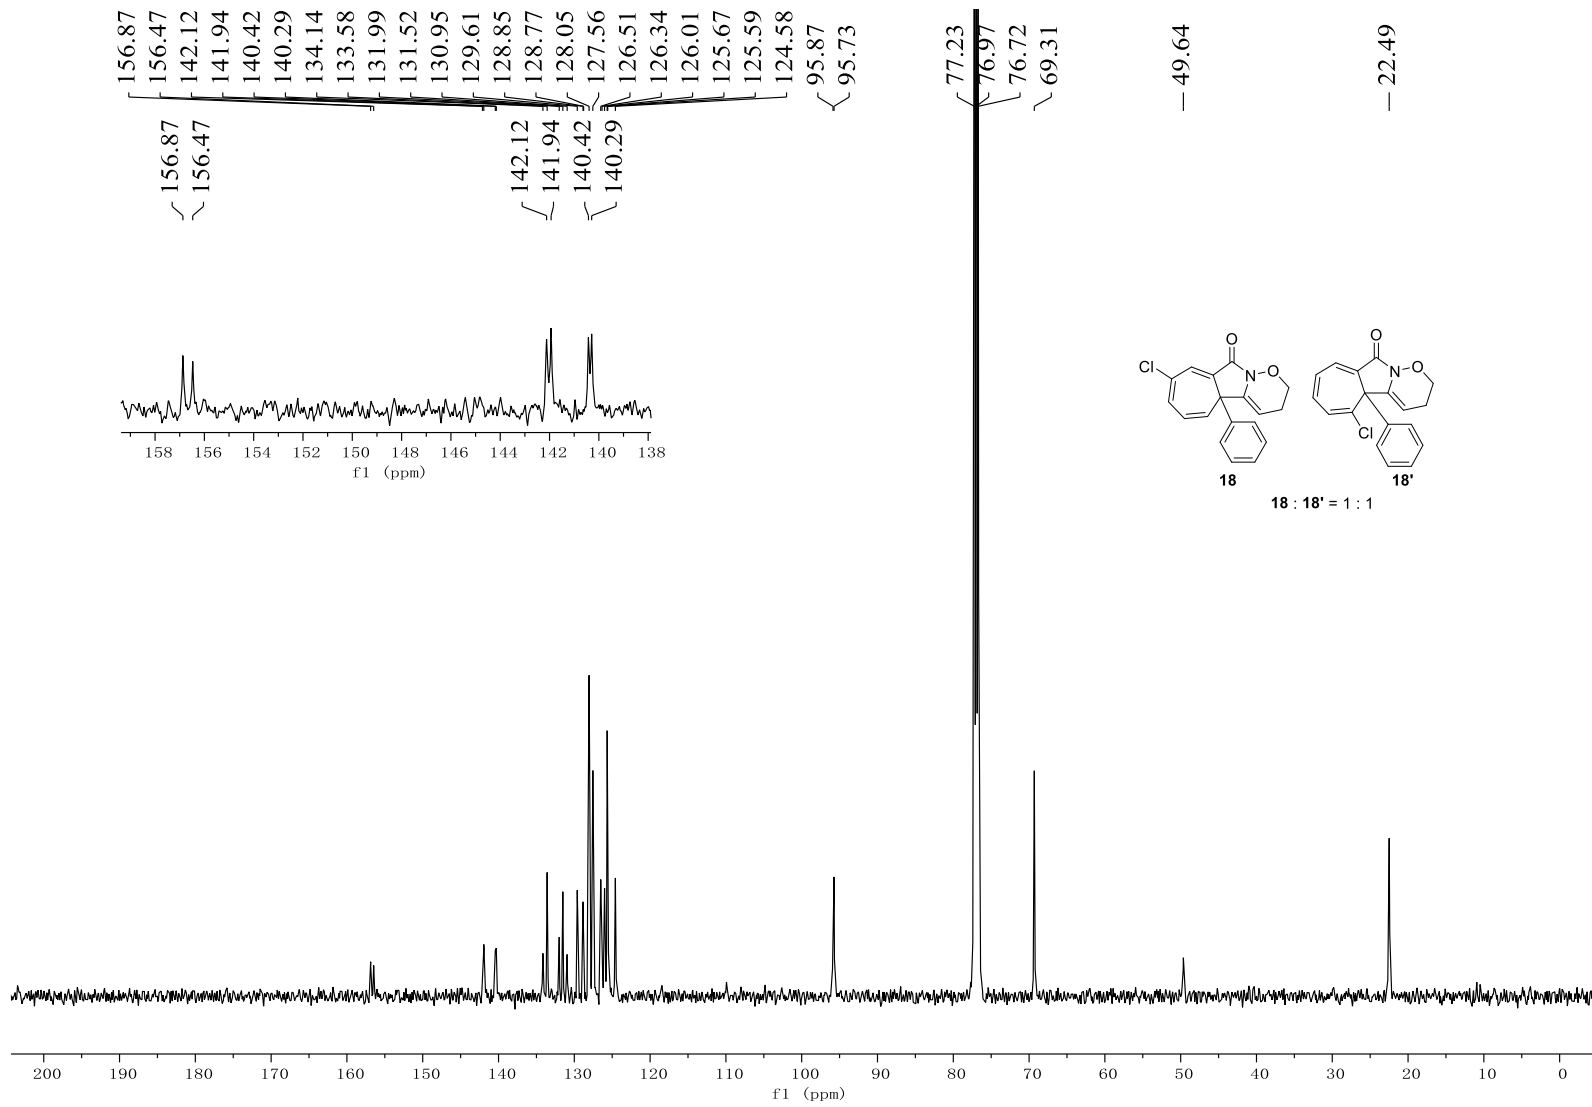

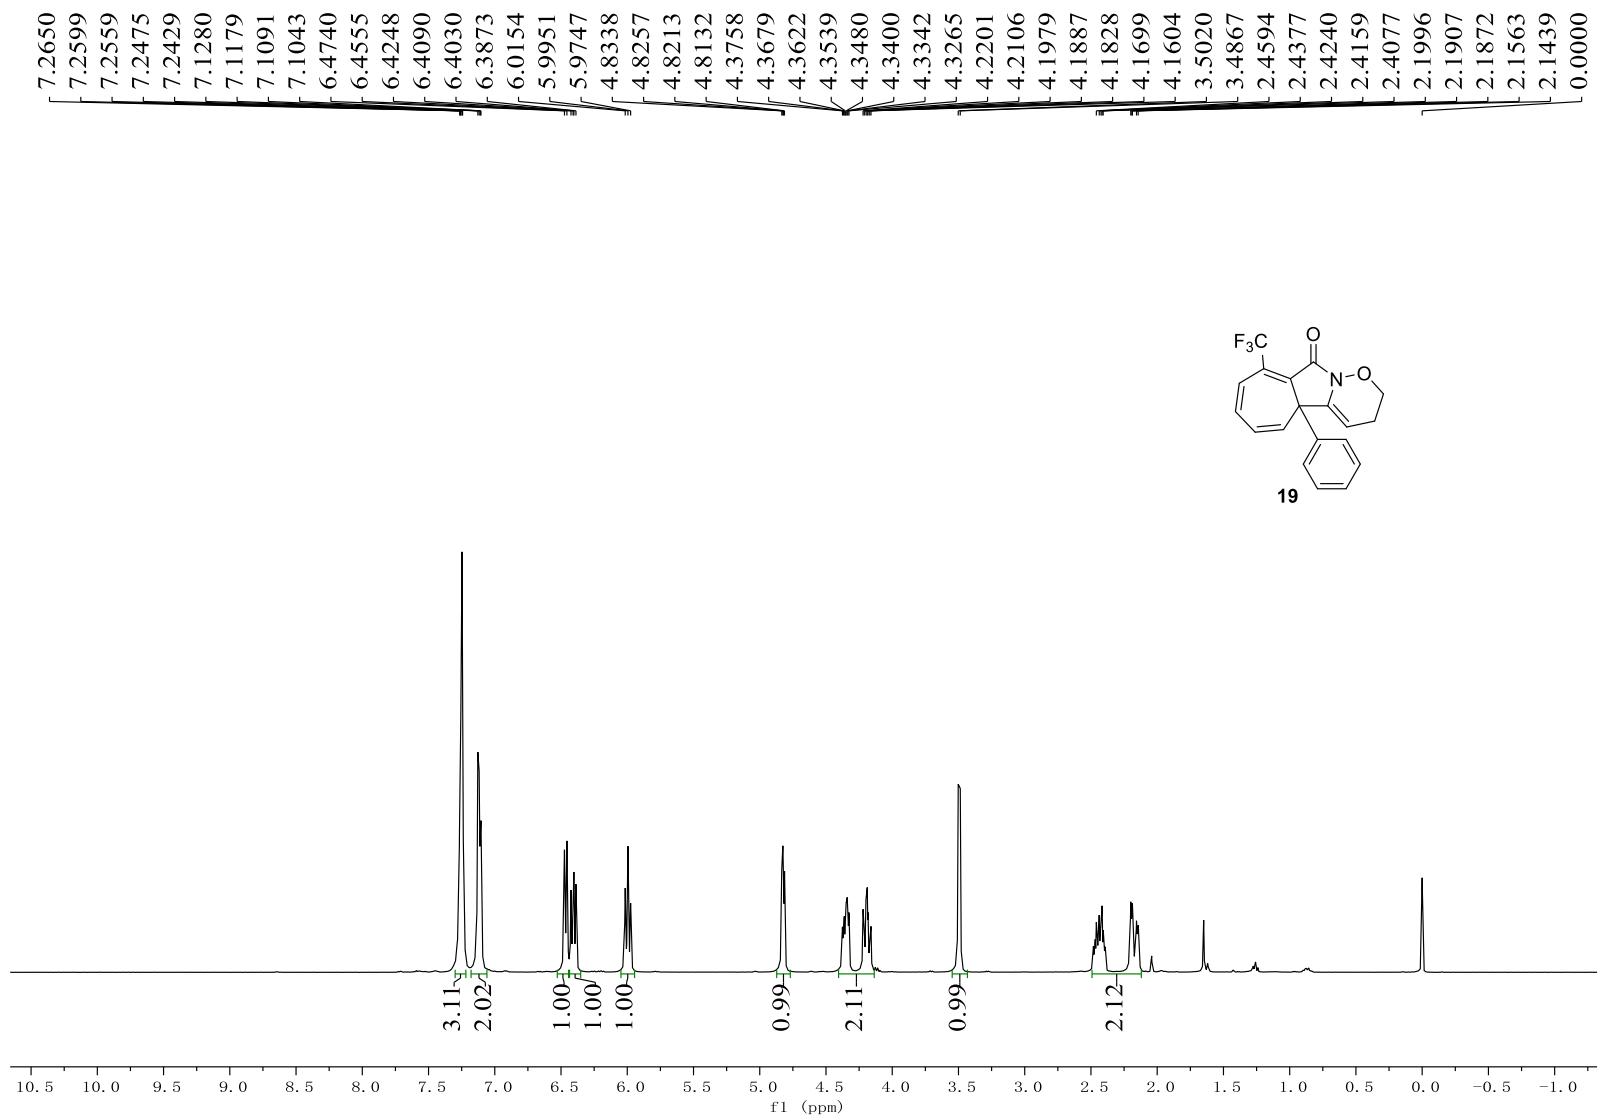

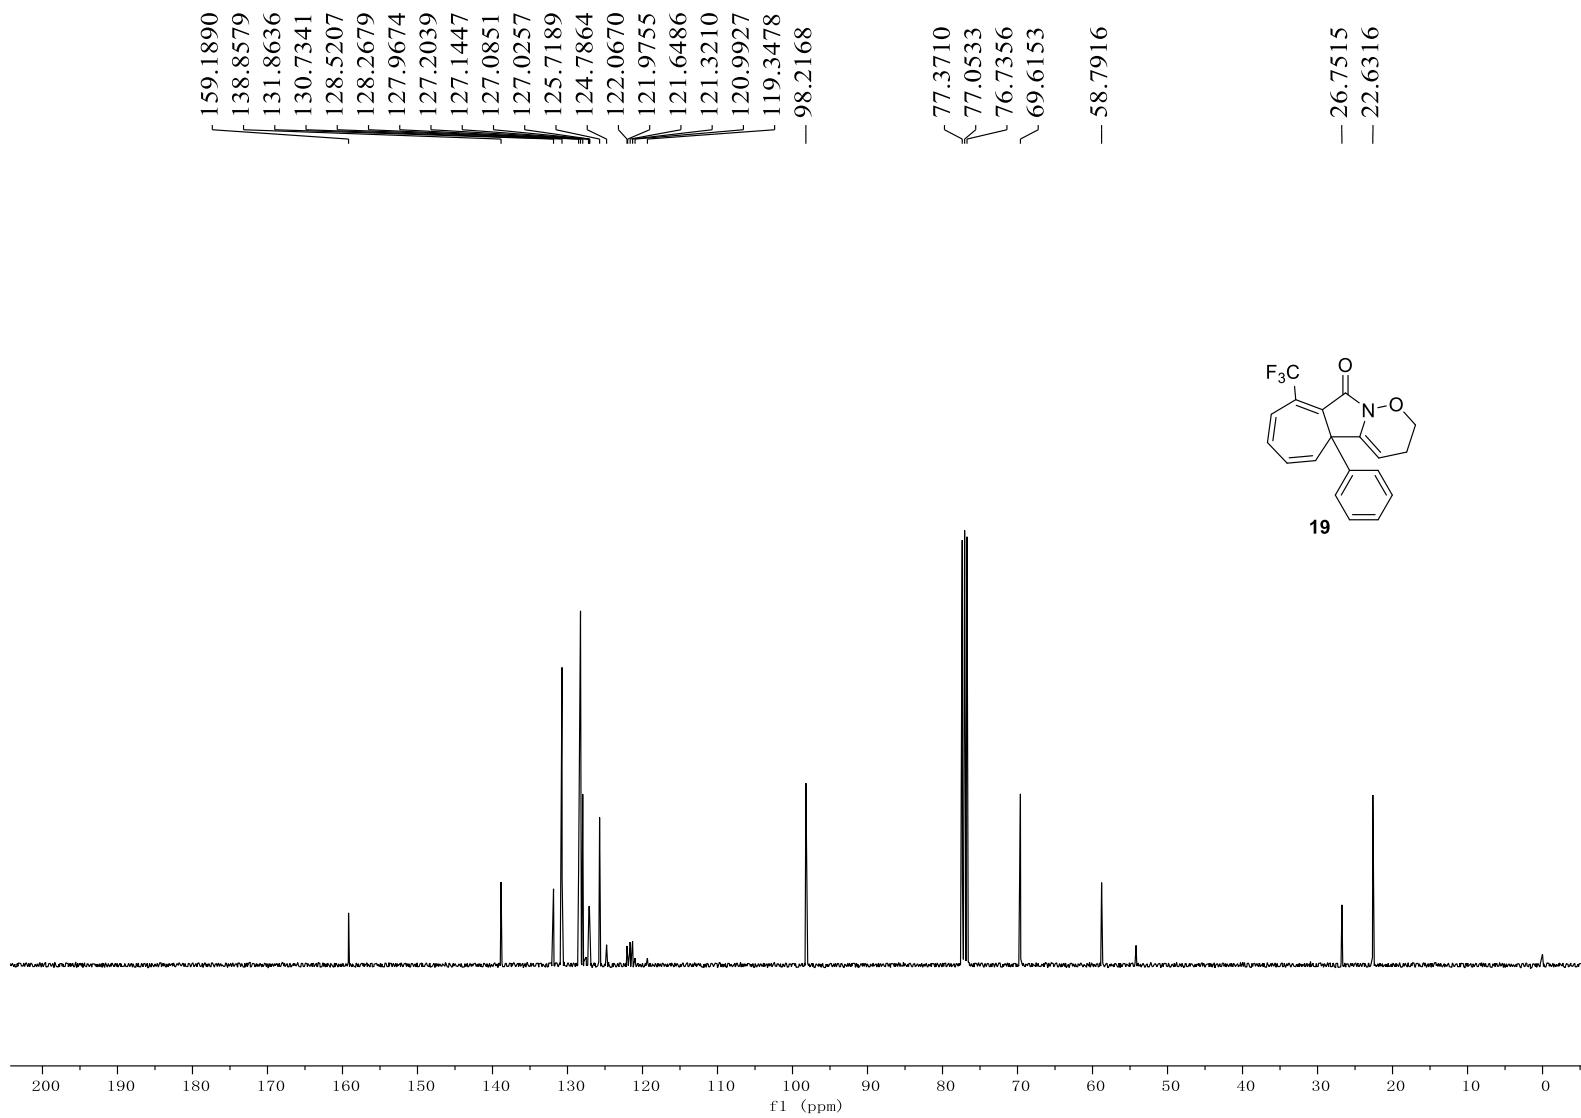

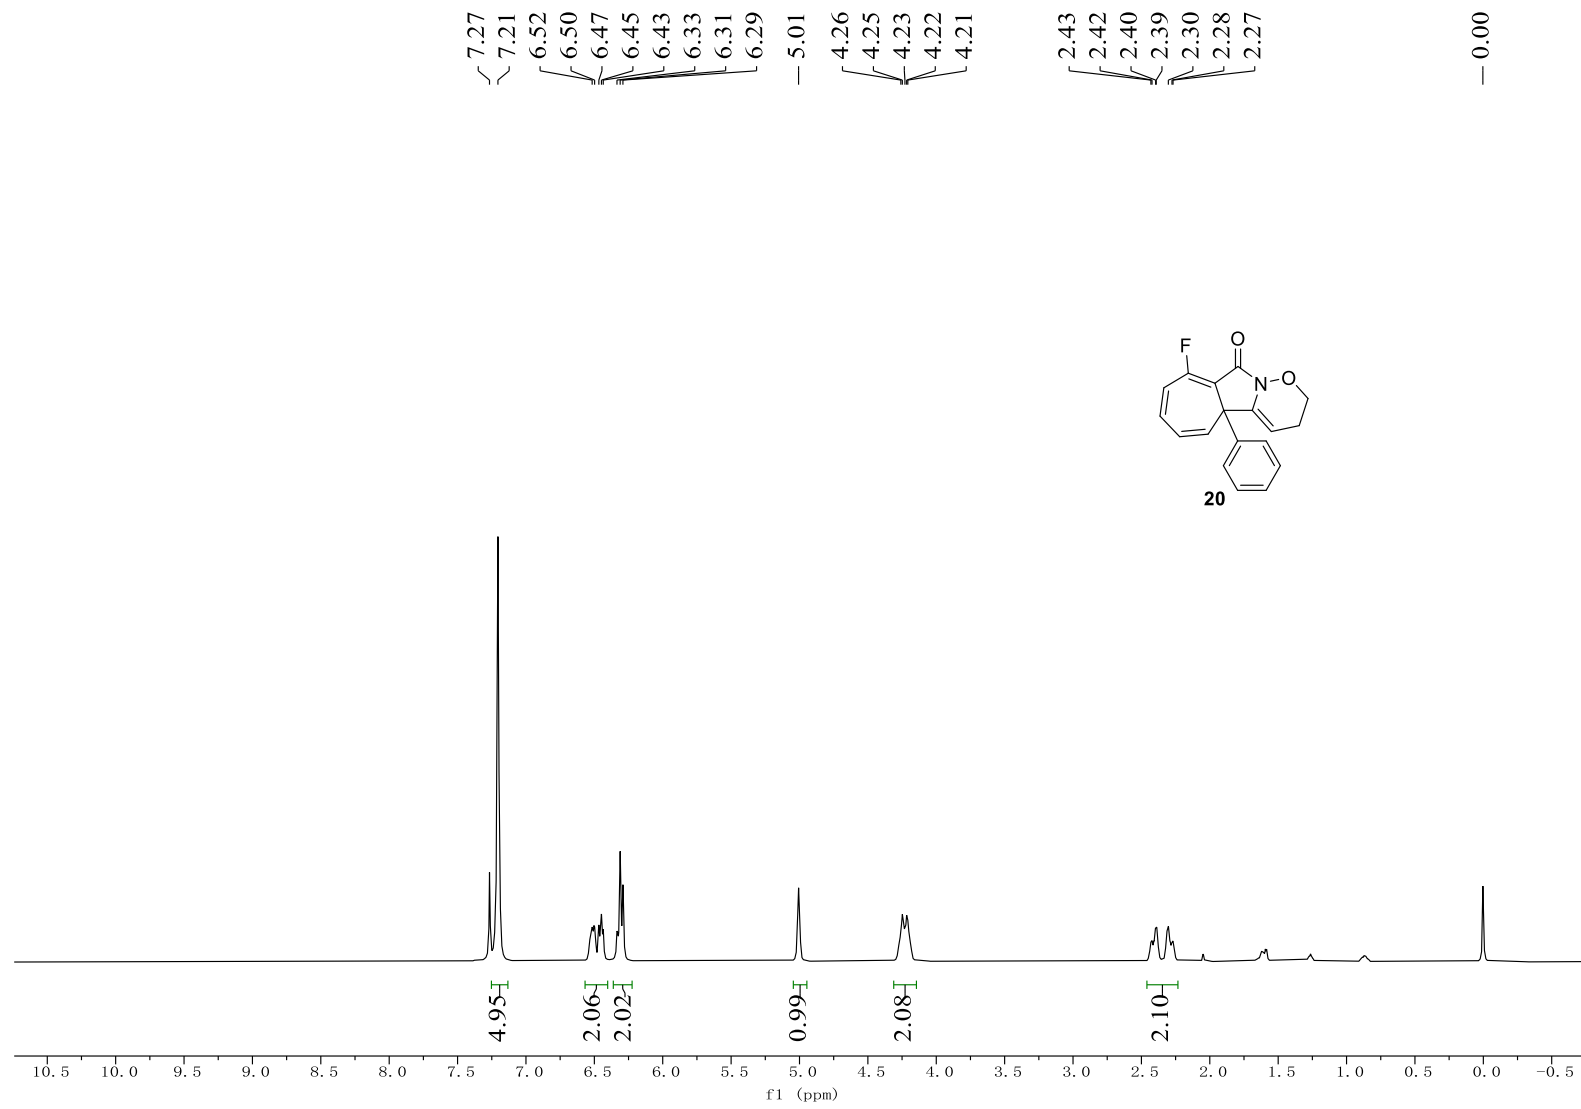

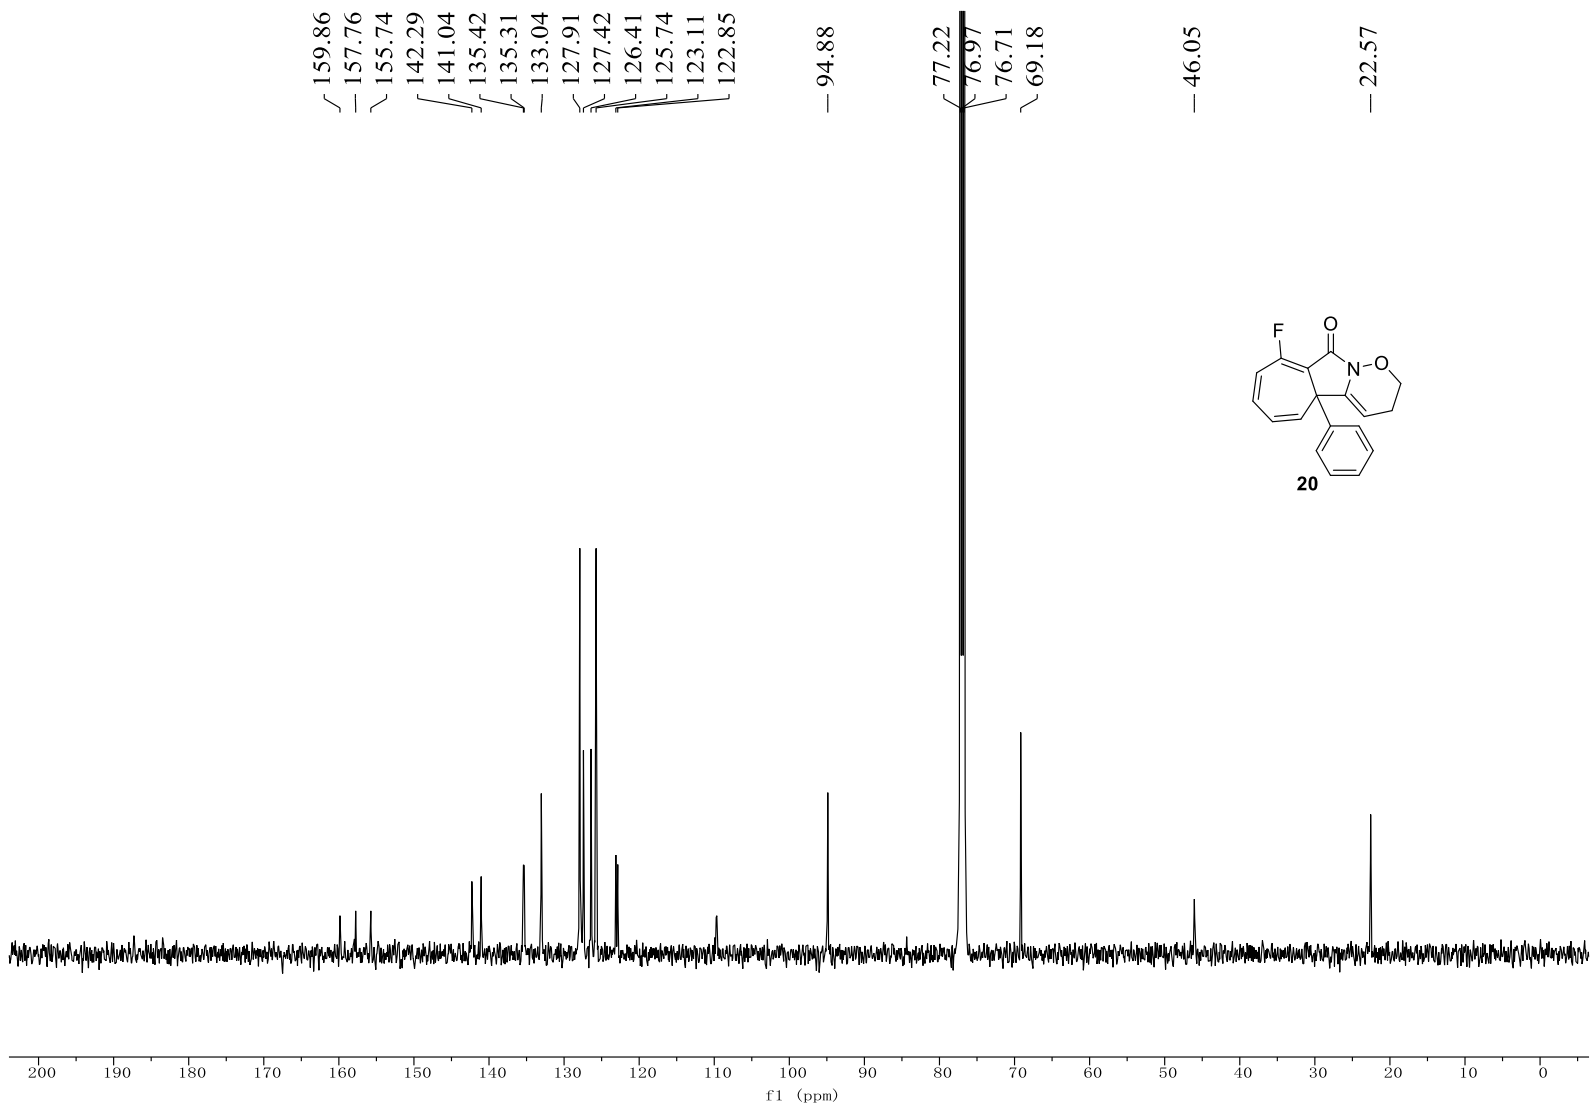



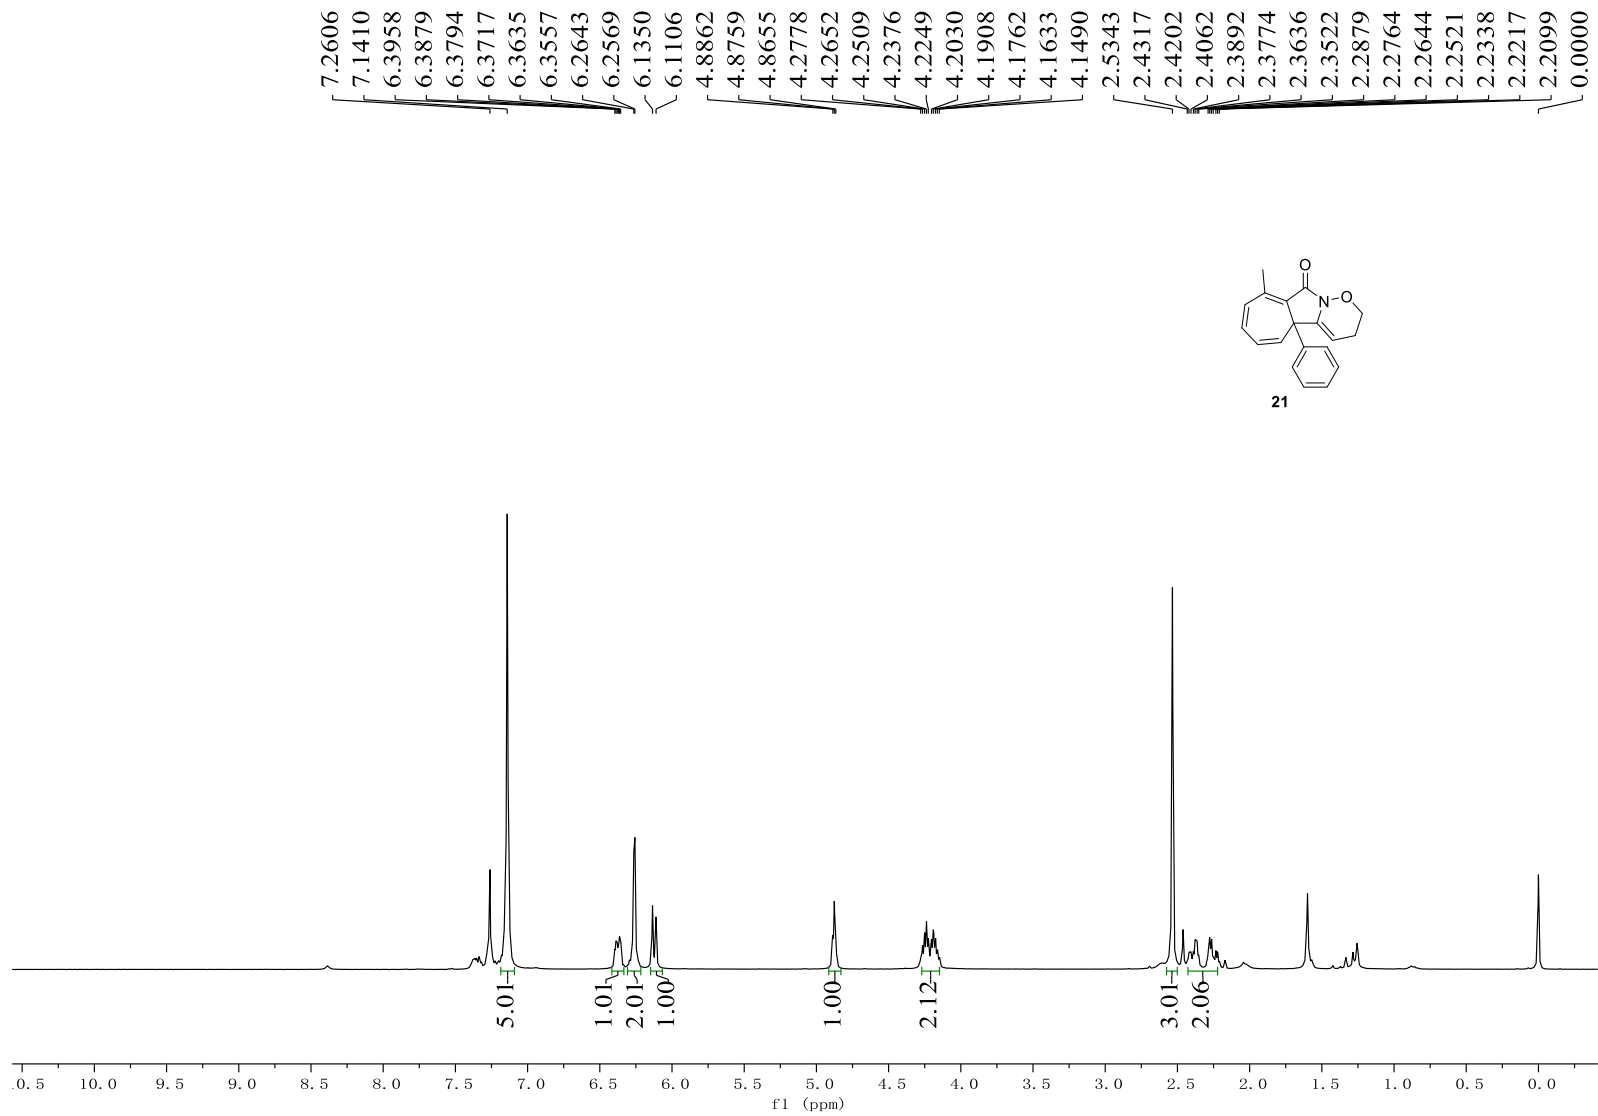

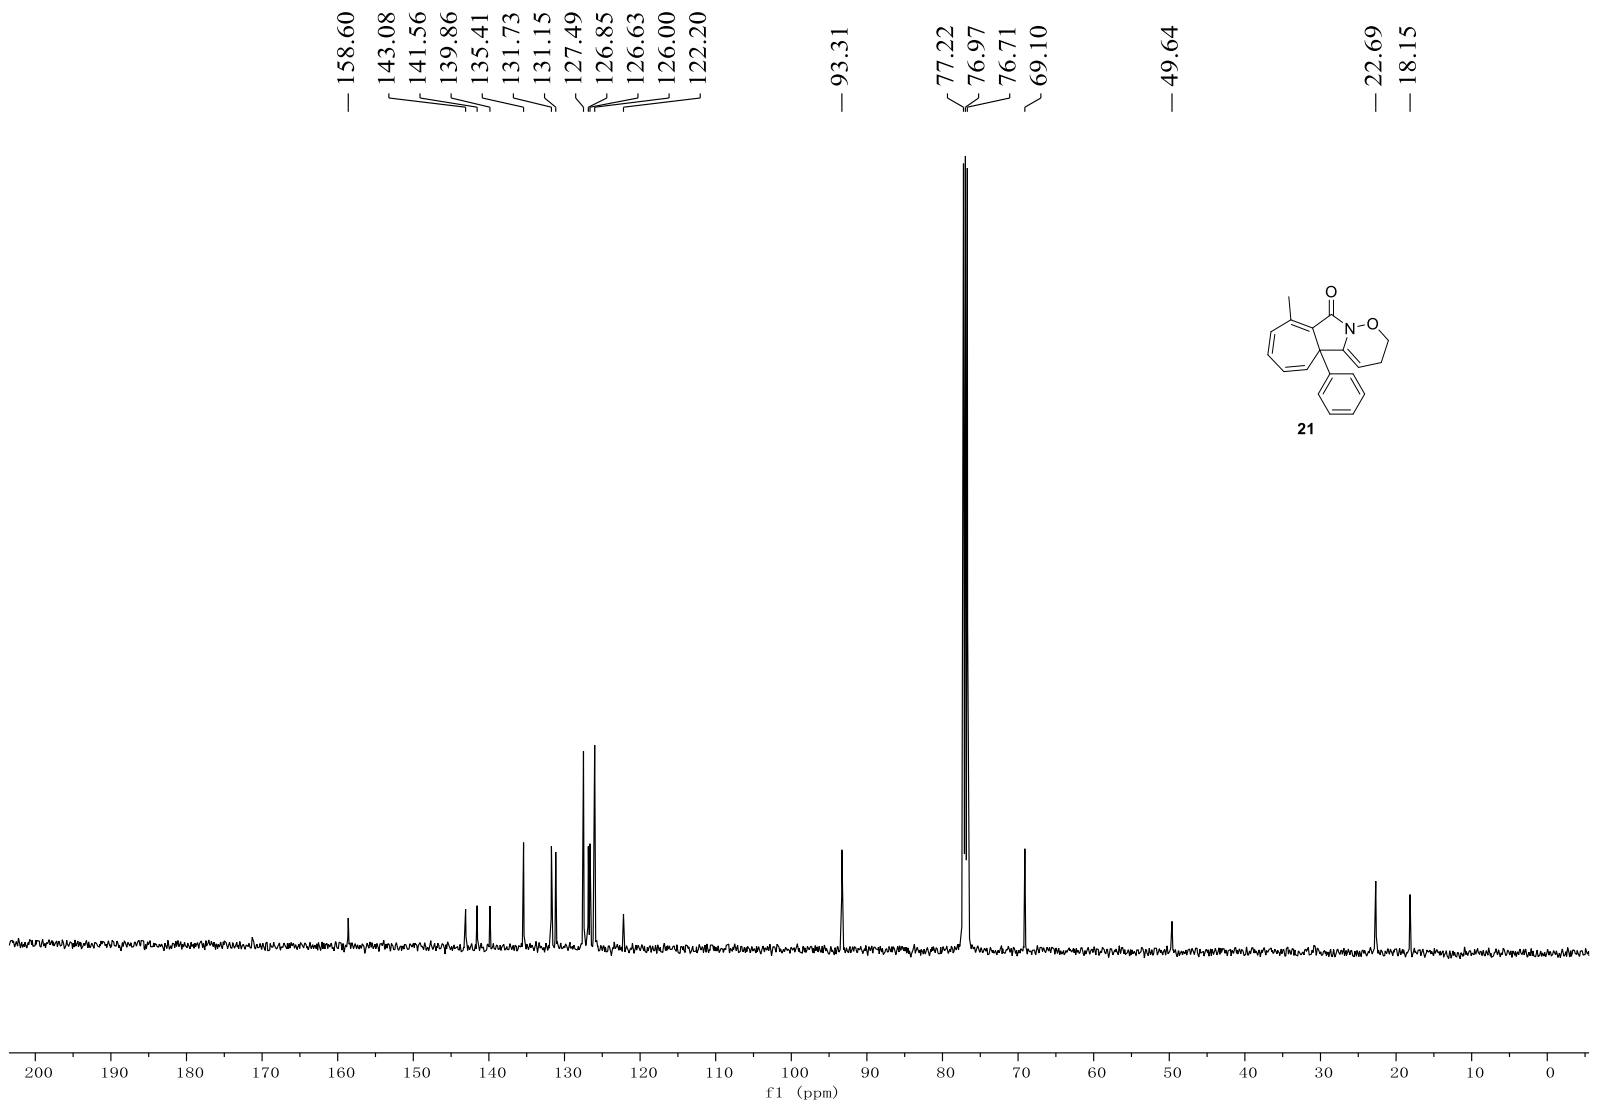

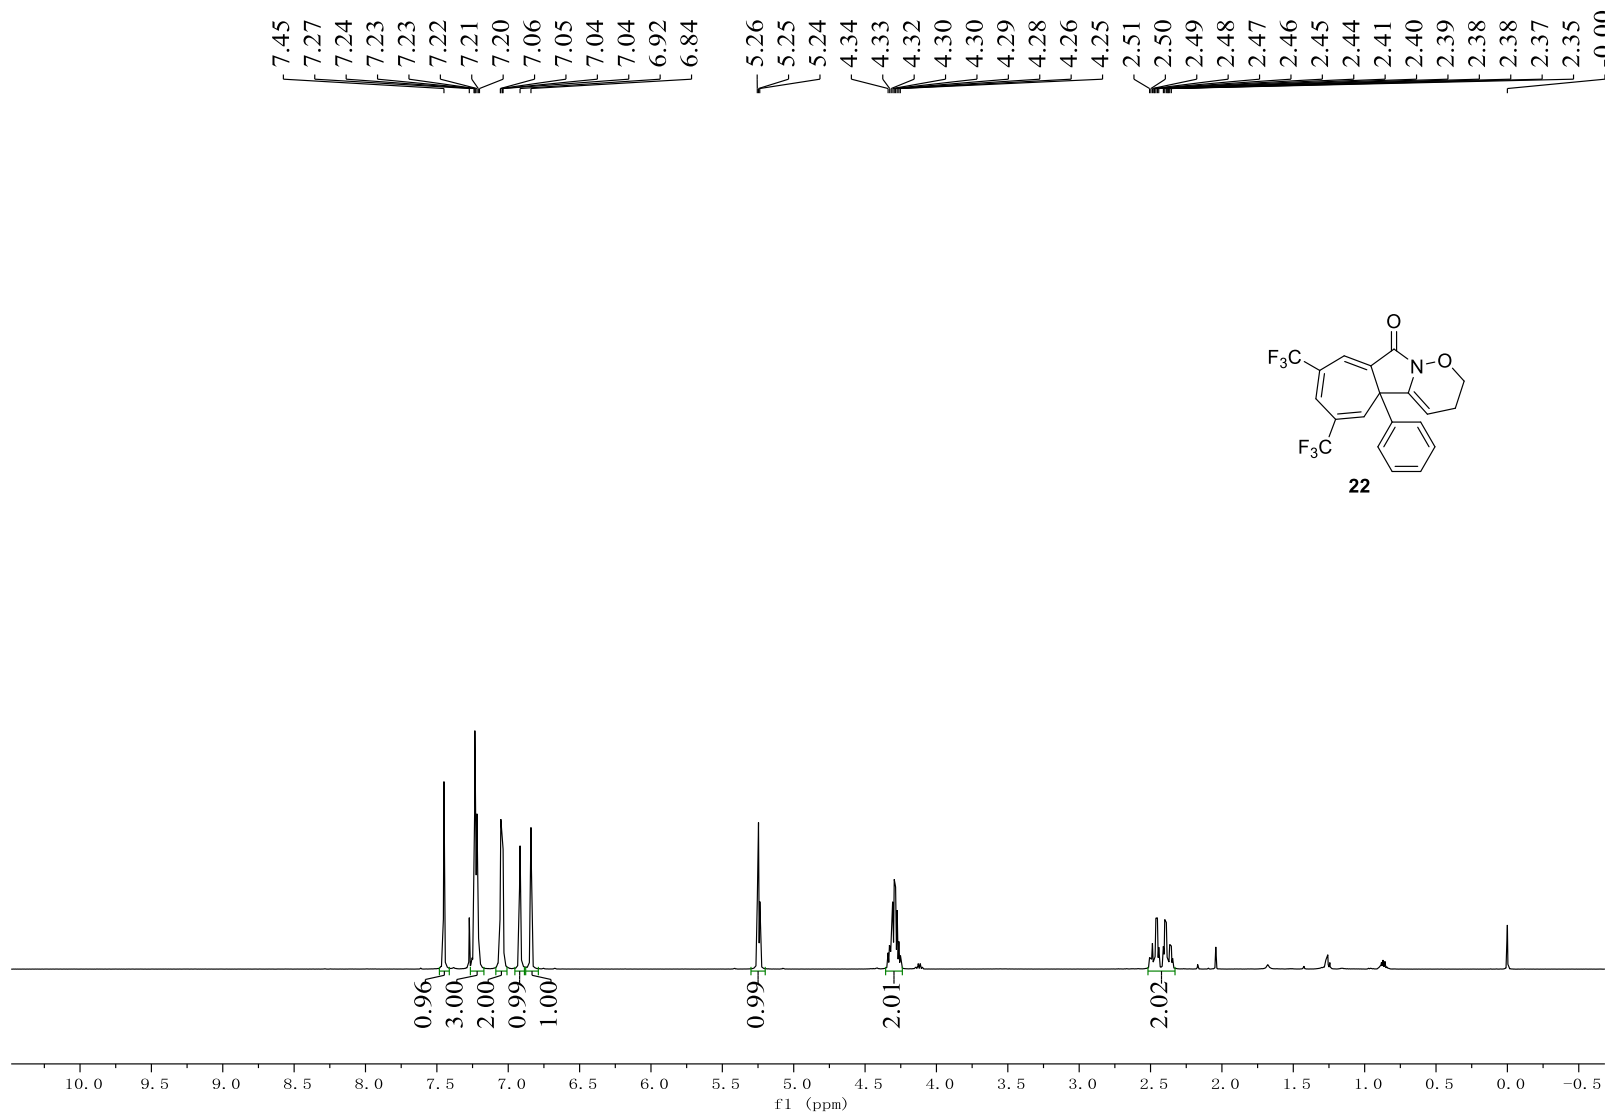

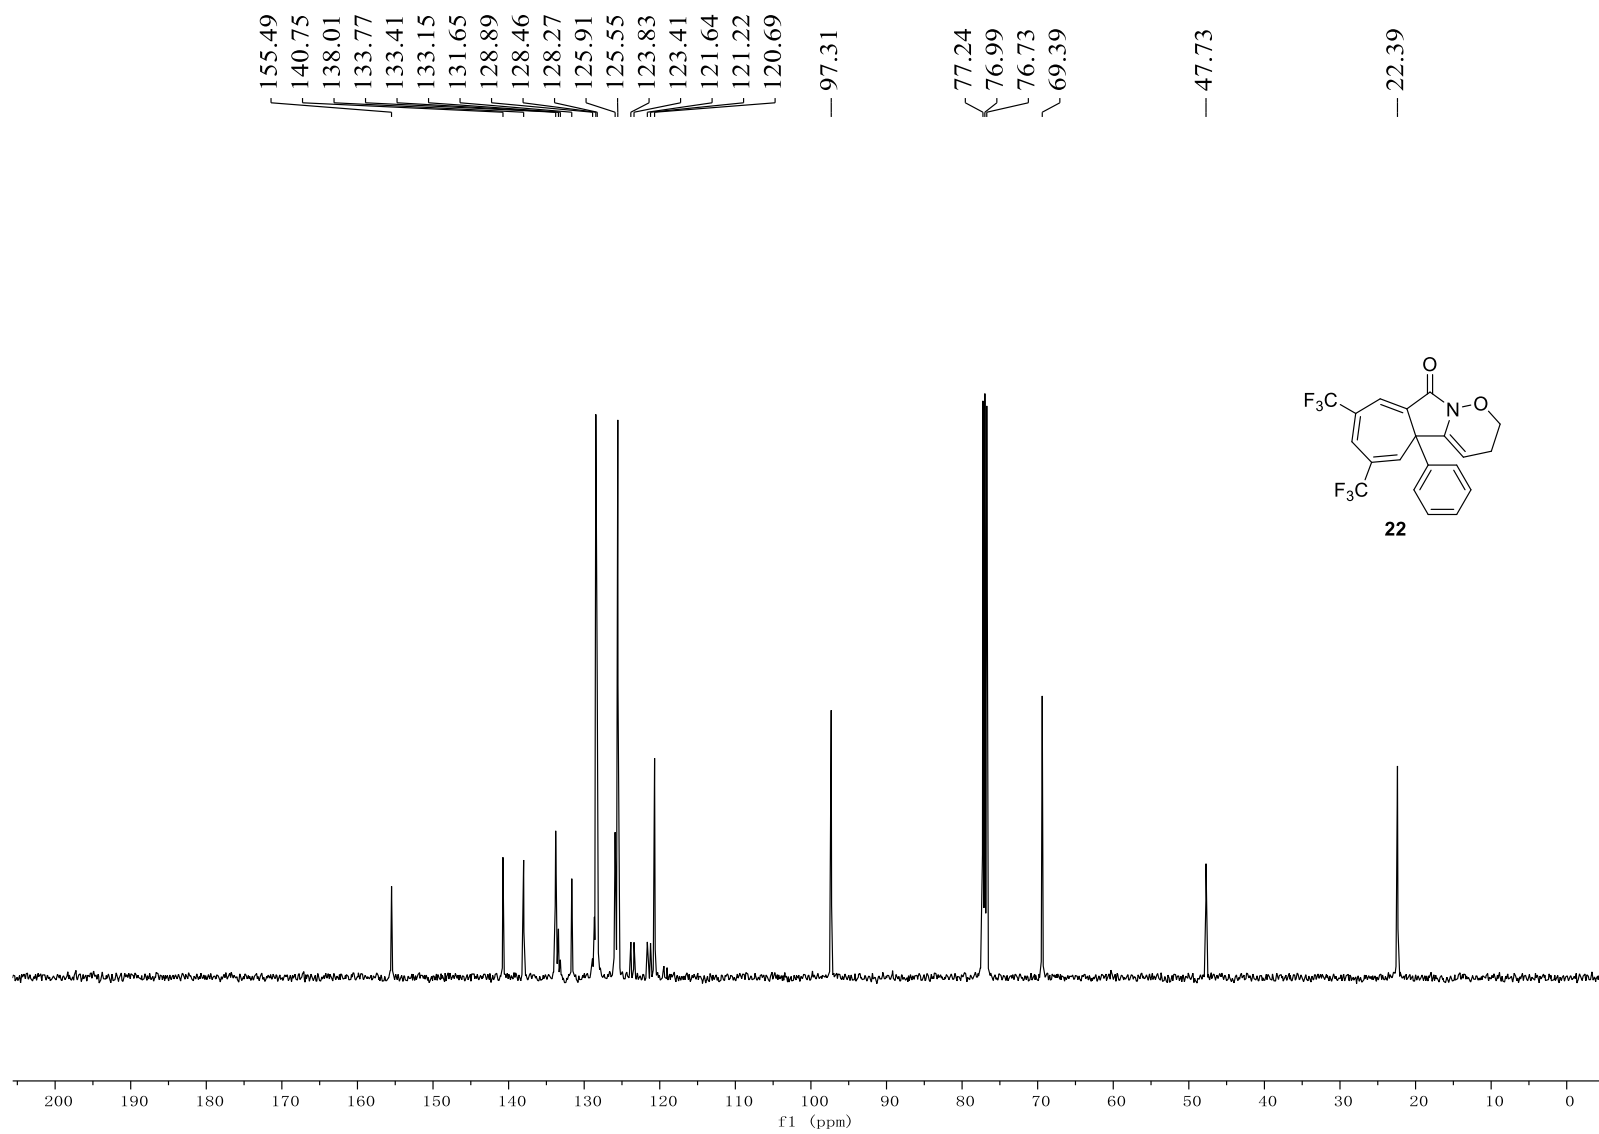

155.49  
140.75  
138.01  
133.77  
133.41  
133.15  
131.65  
128.89  
128.46  
128.27  
125.91  
125.55  
123.83  
123.41  
121.64  
121.22  
120.69

— 97.31

77.24  
76.99  
76.73  
69.39

— 47.73

— 22.39

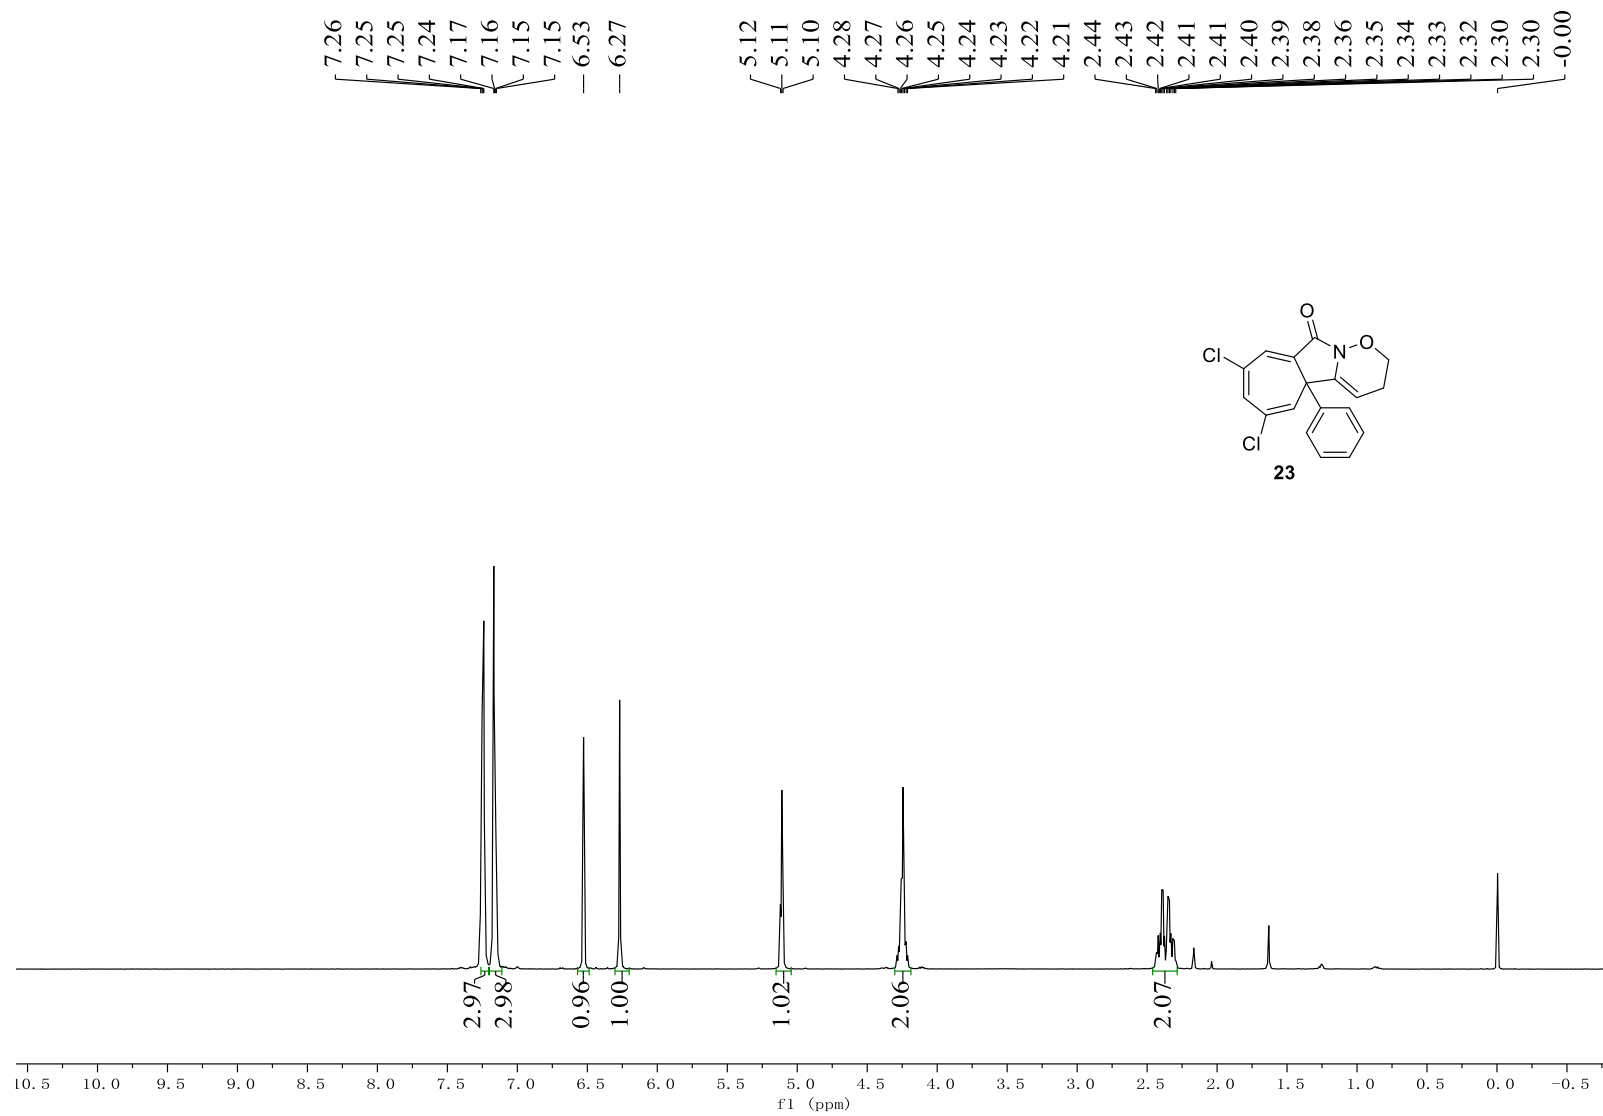

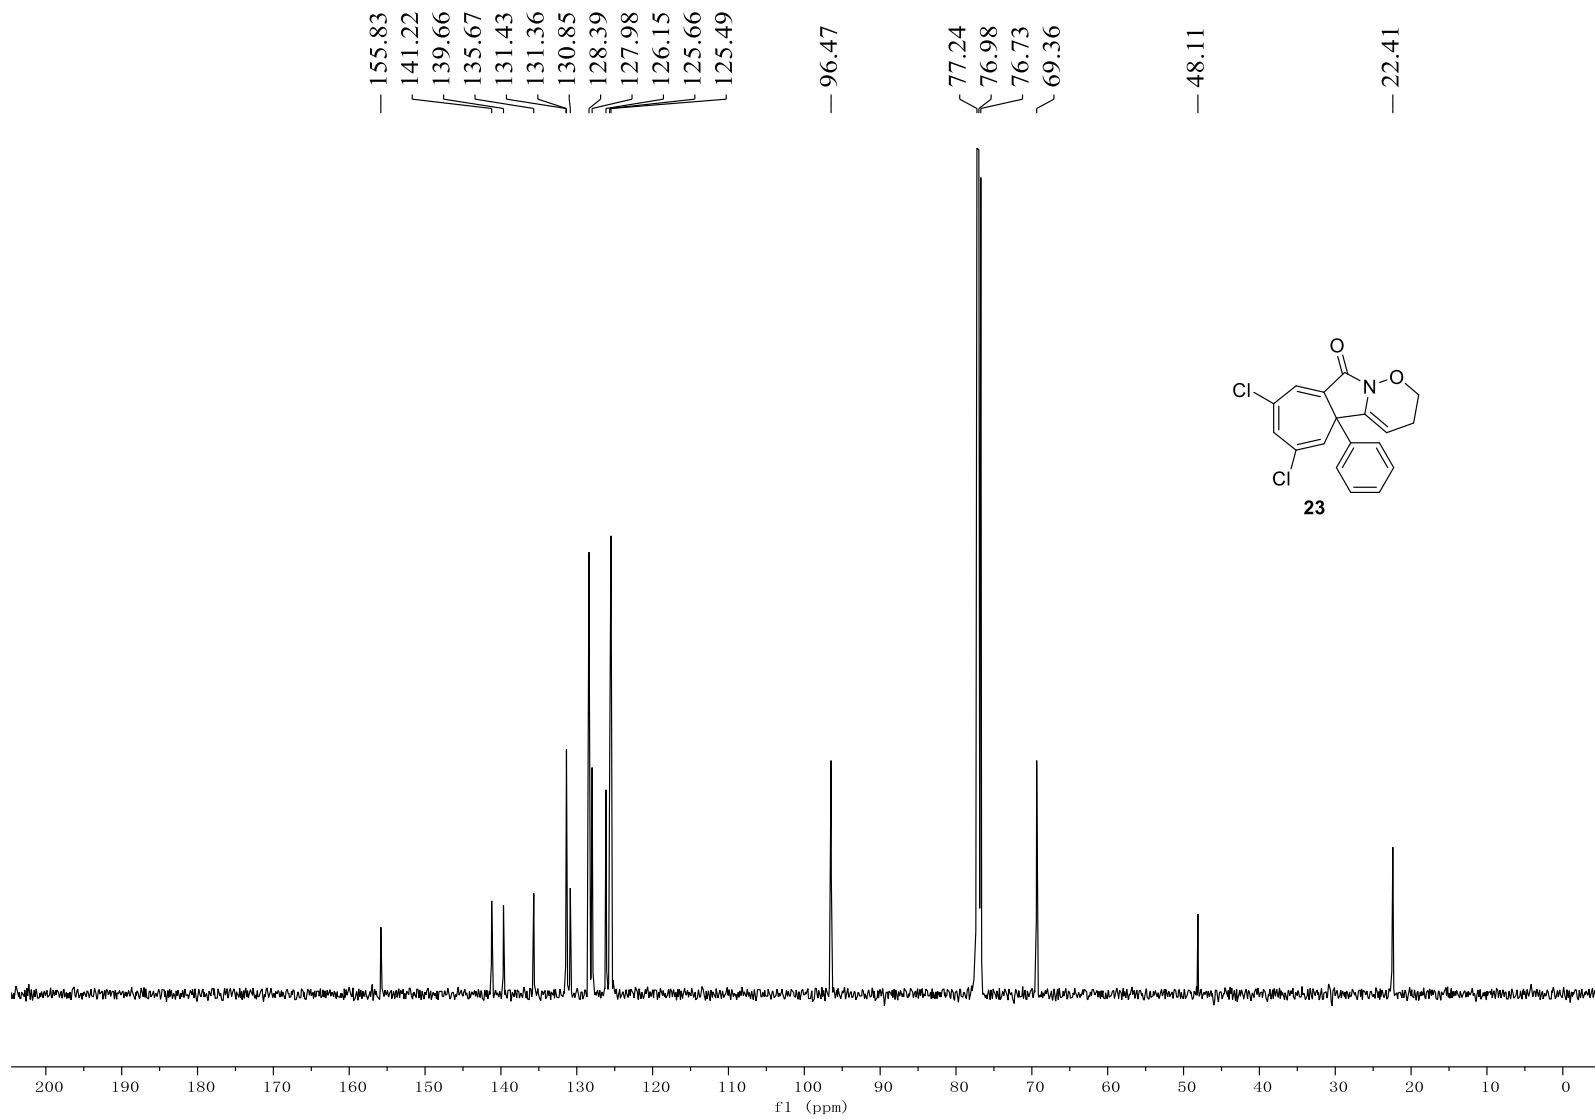

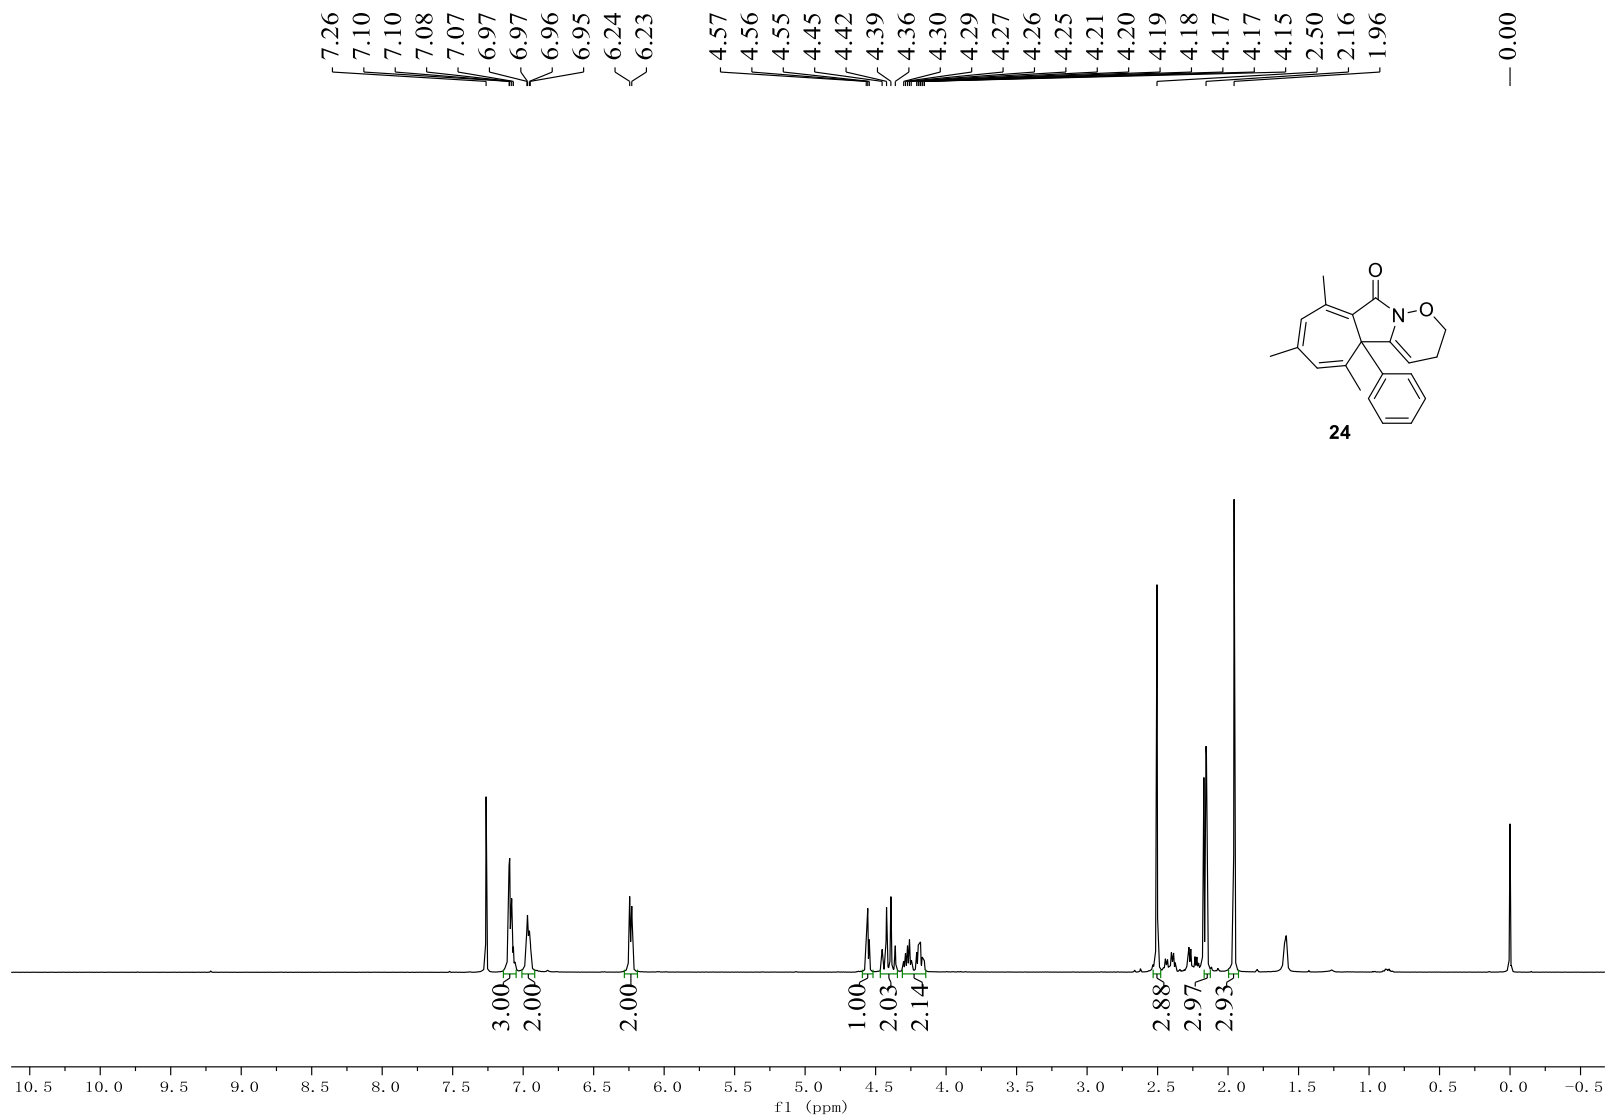

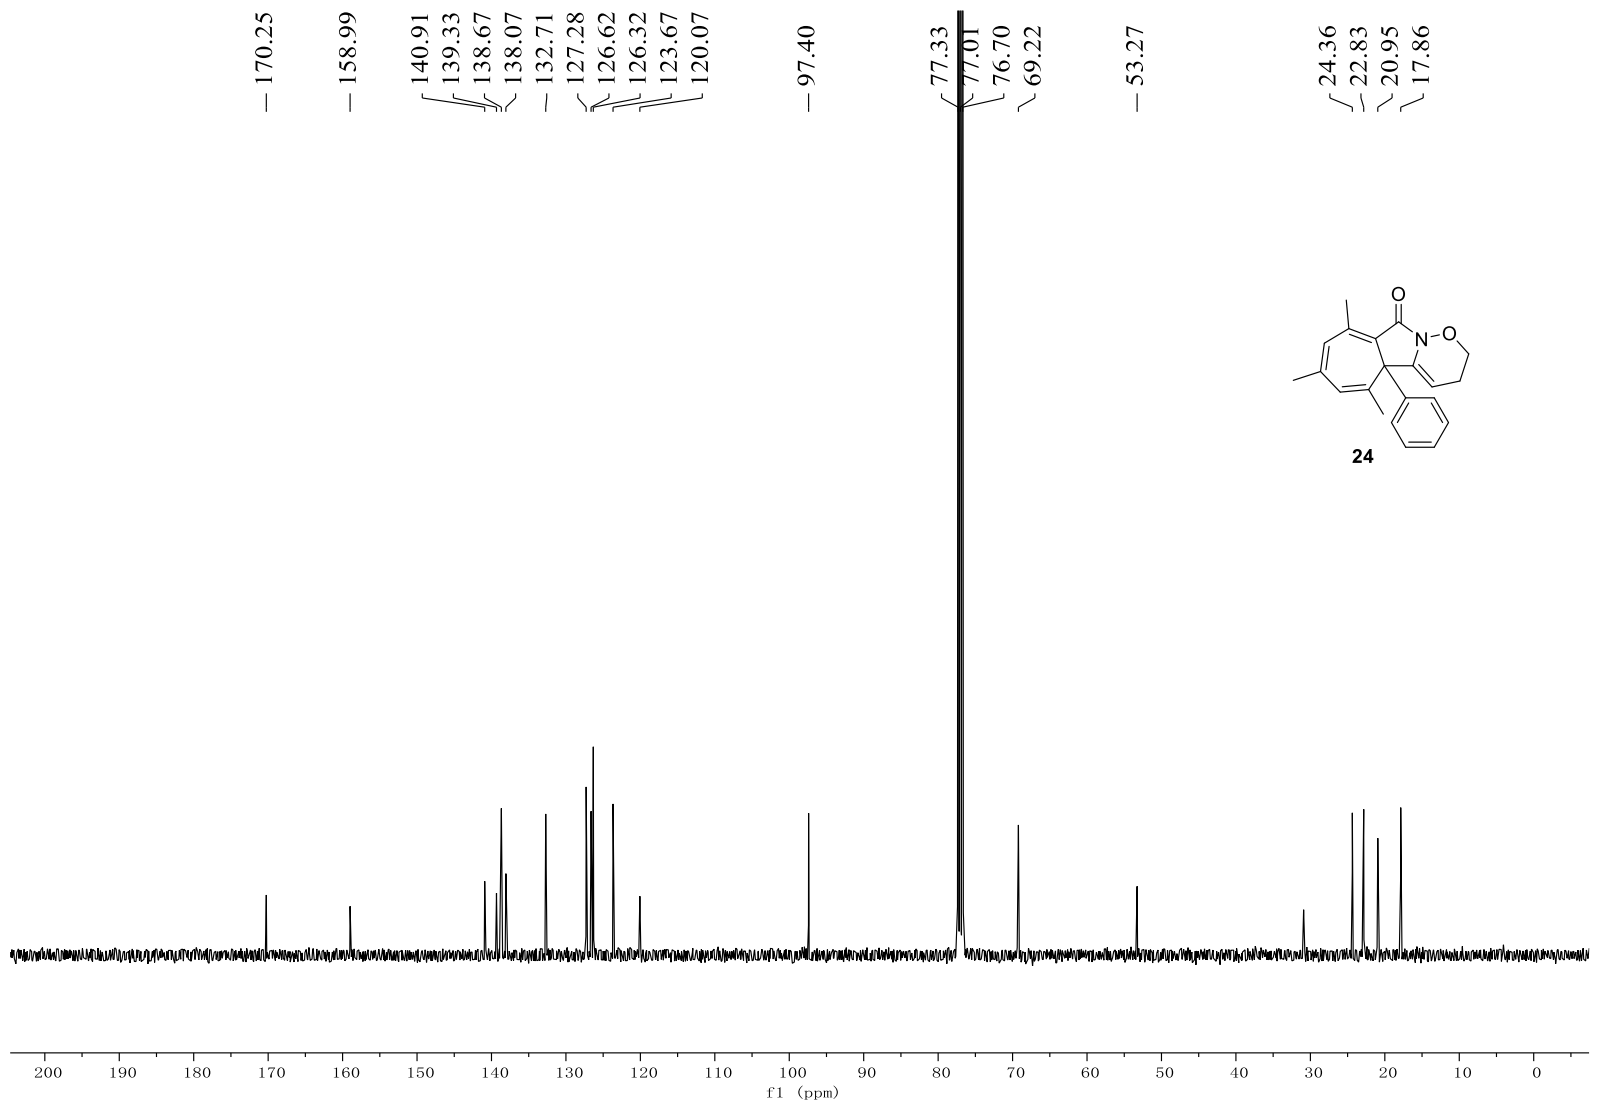



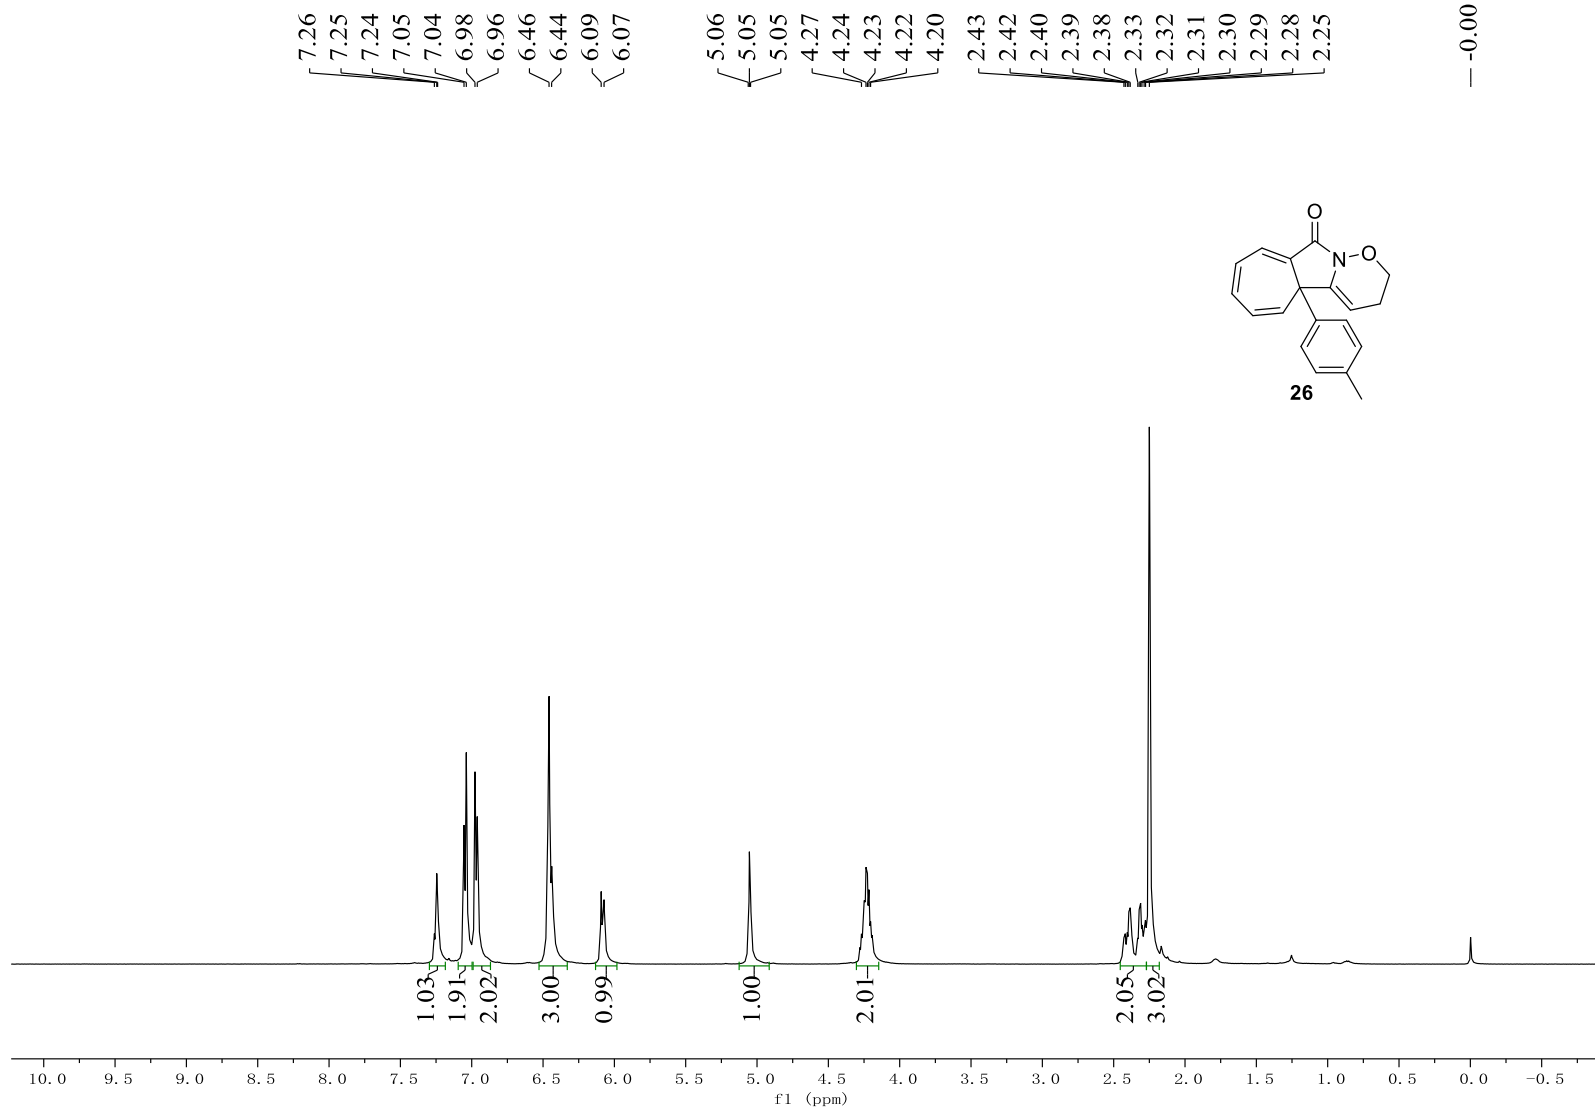

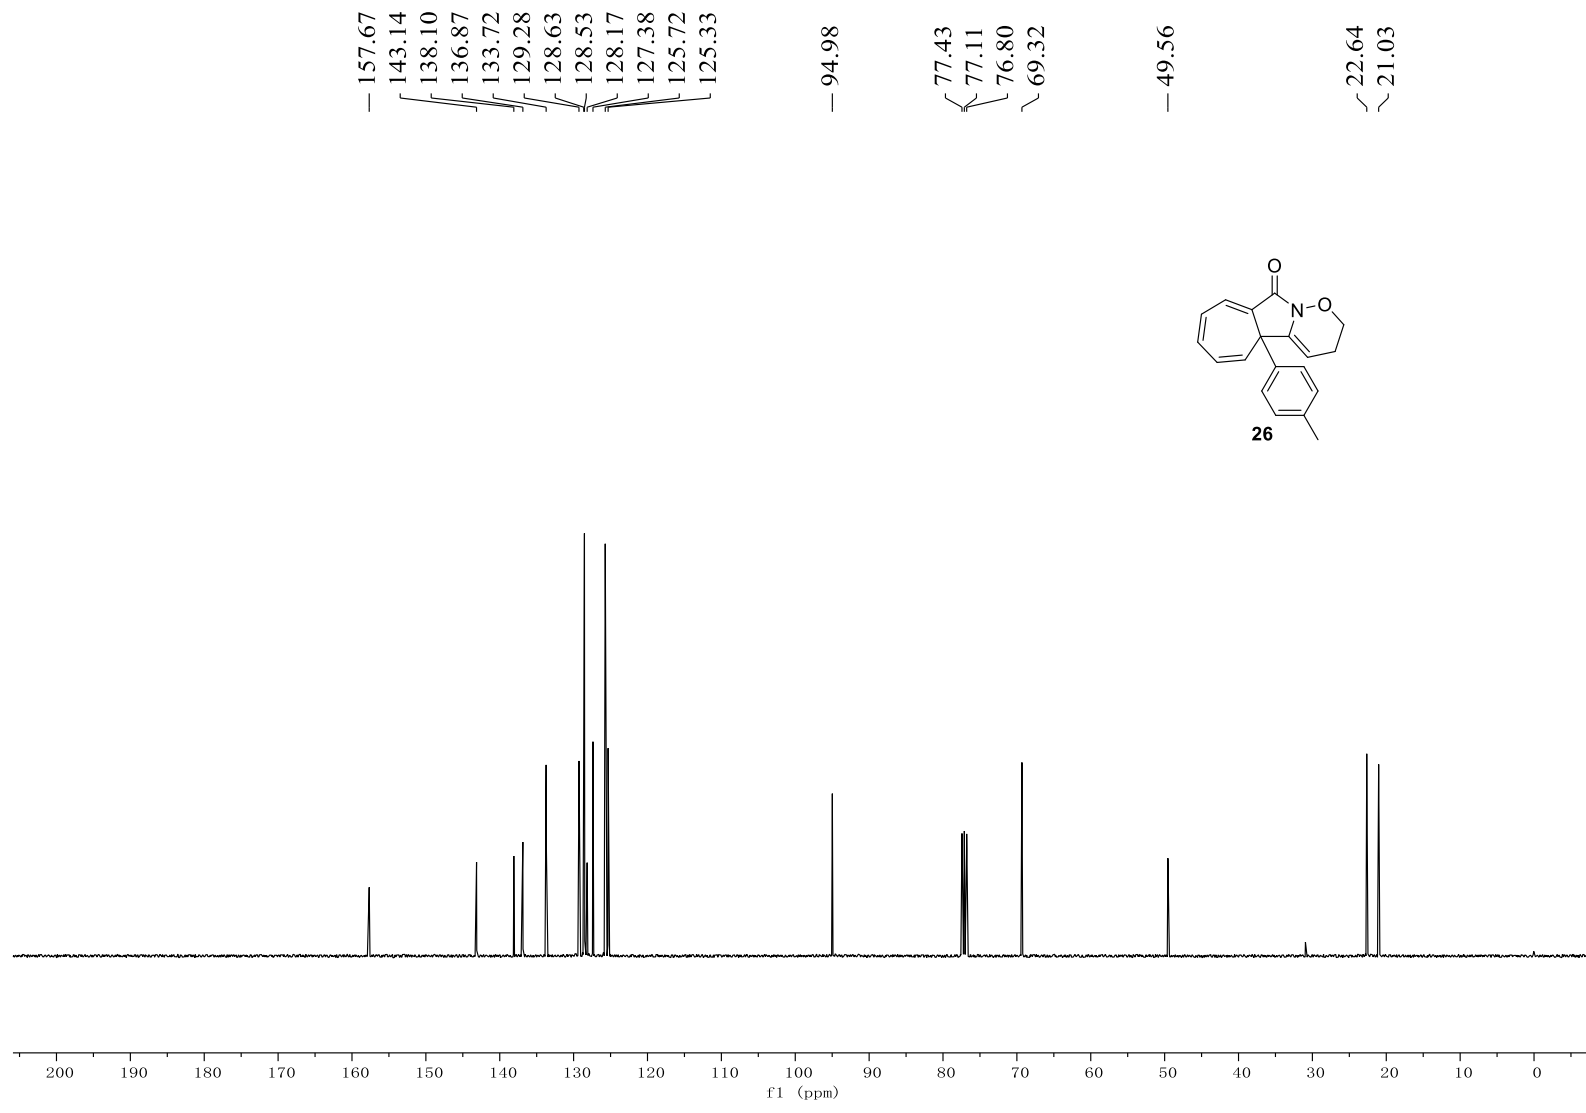

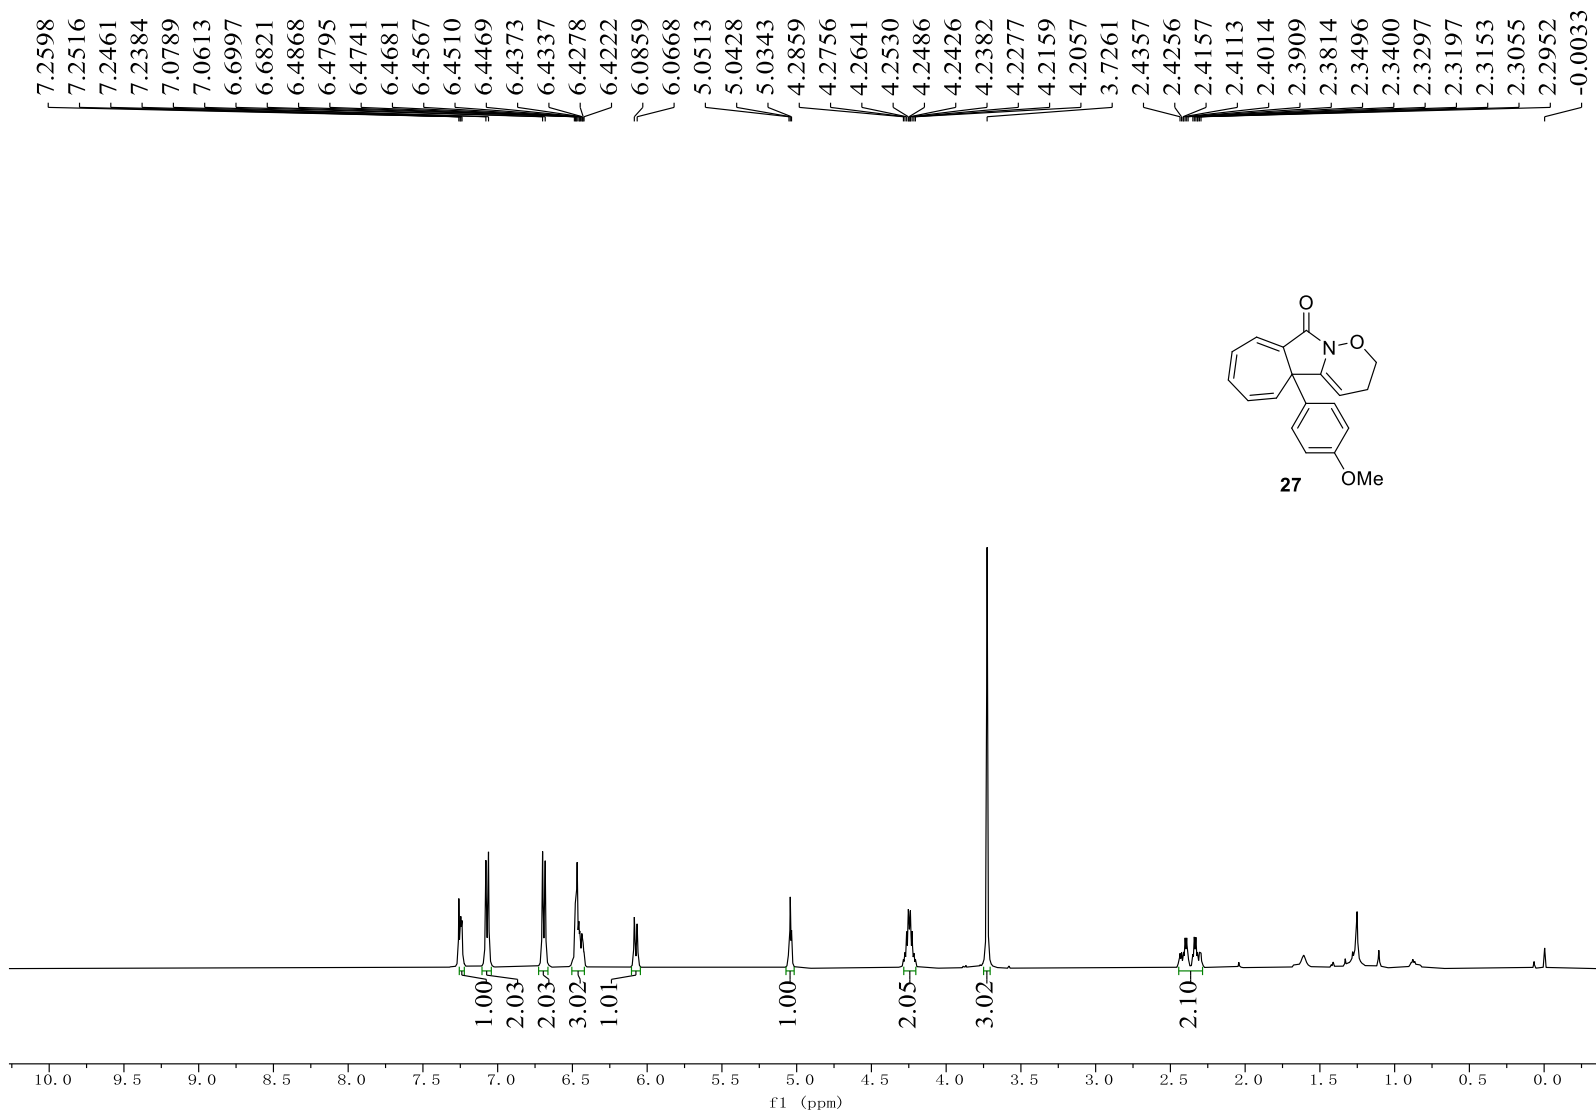

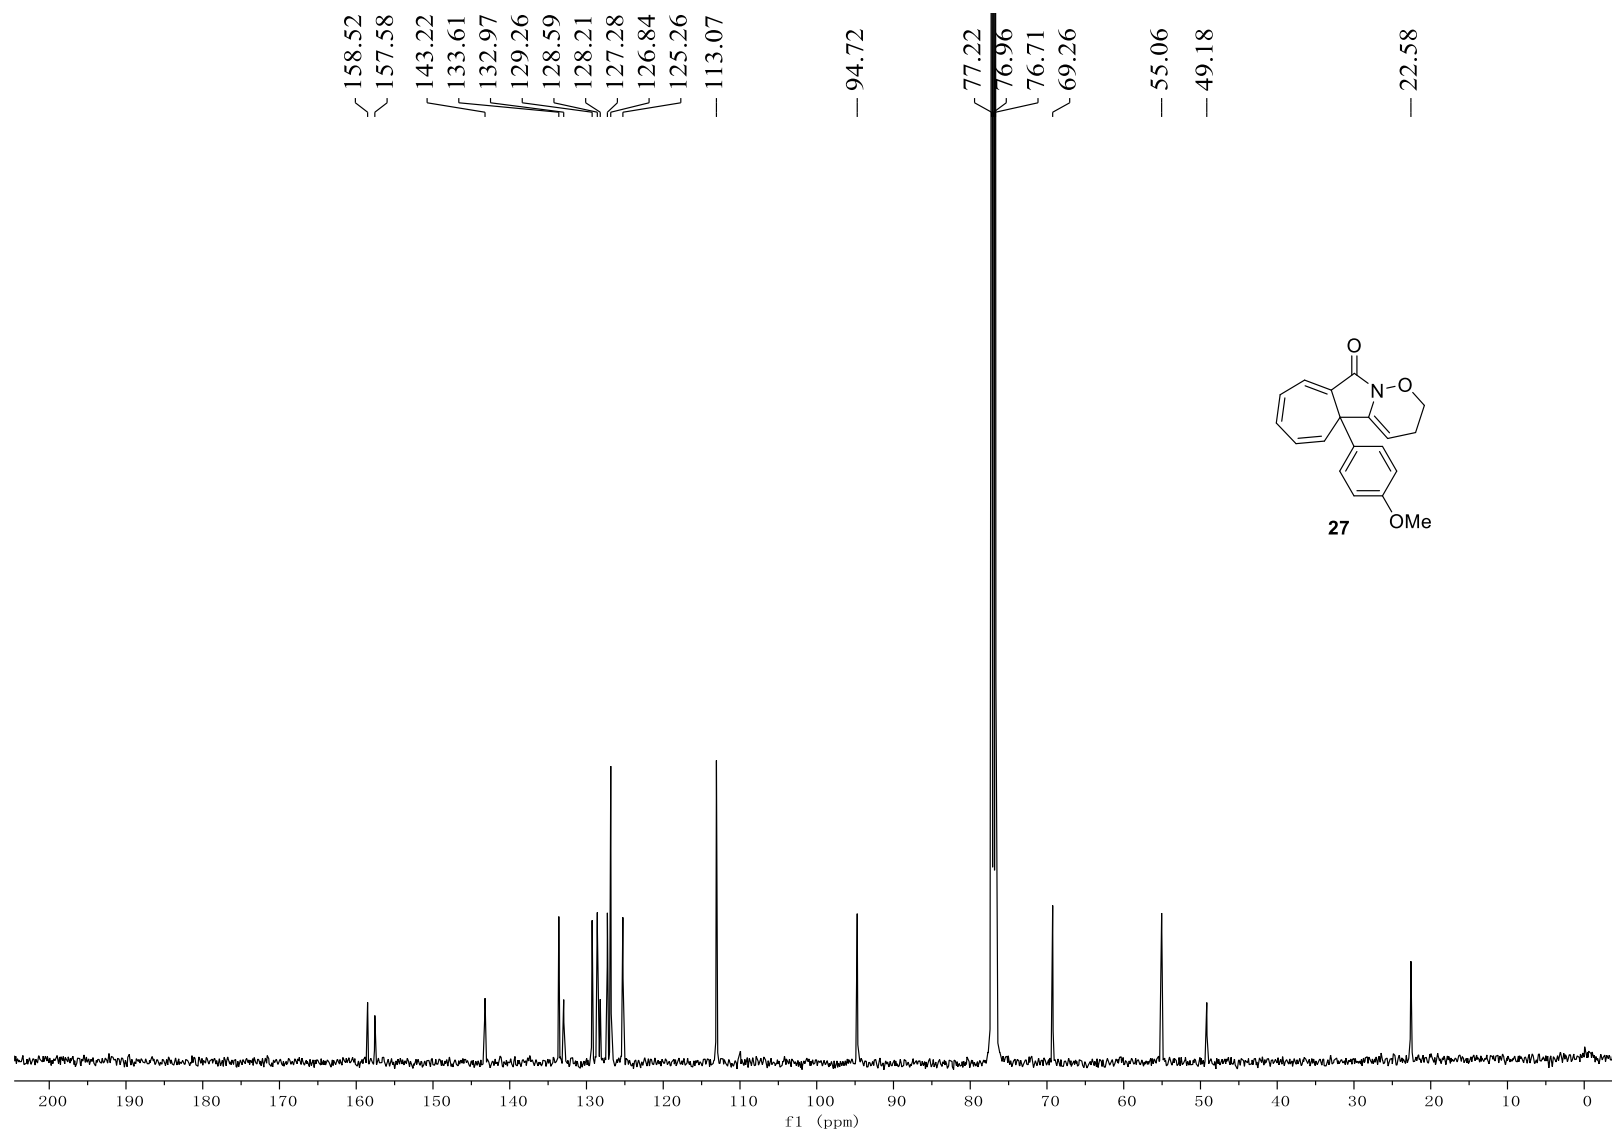

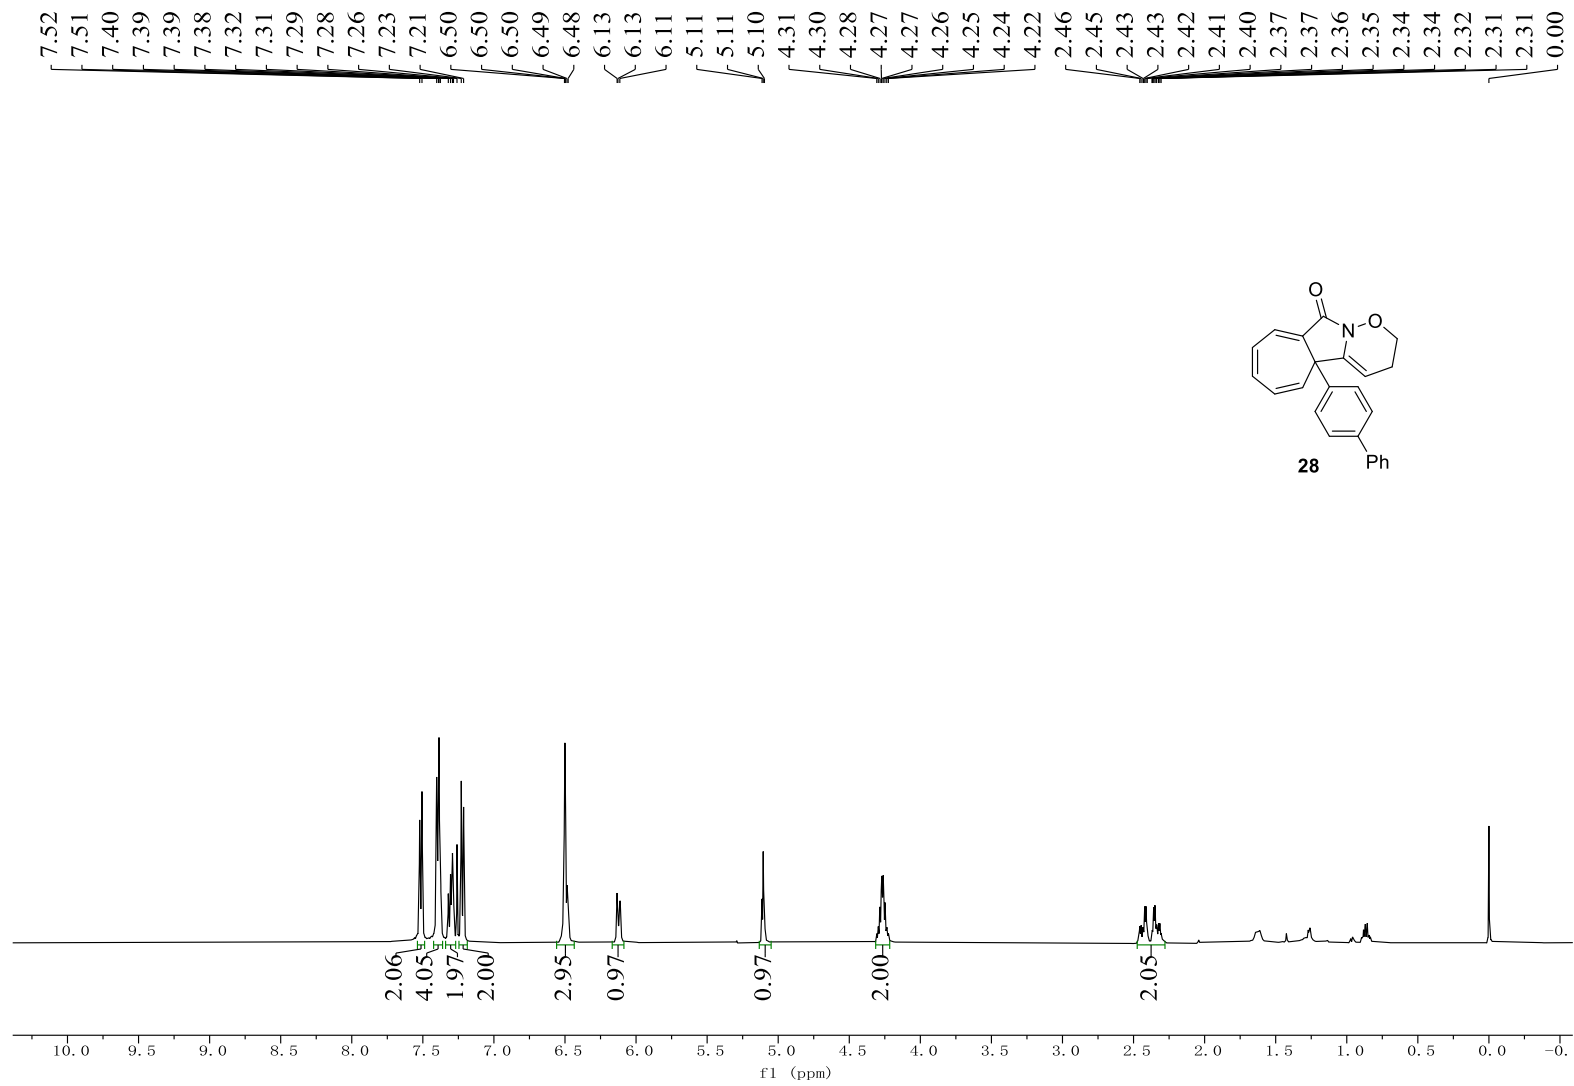

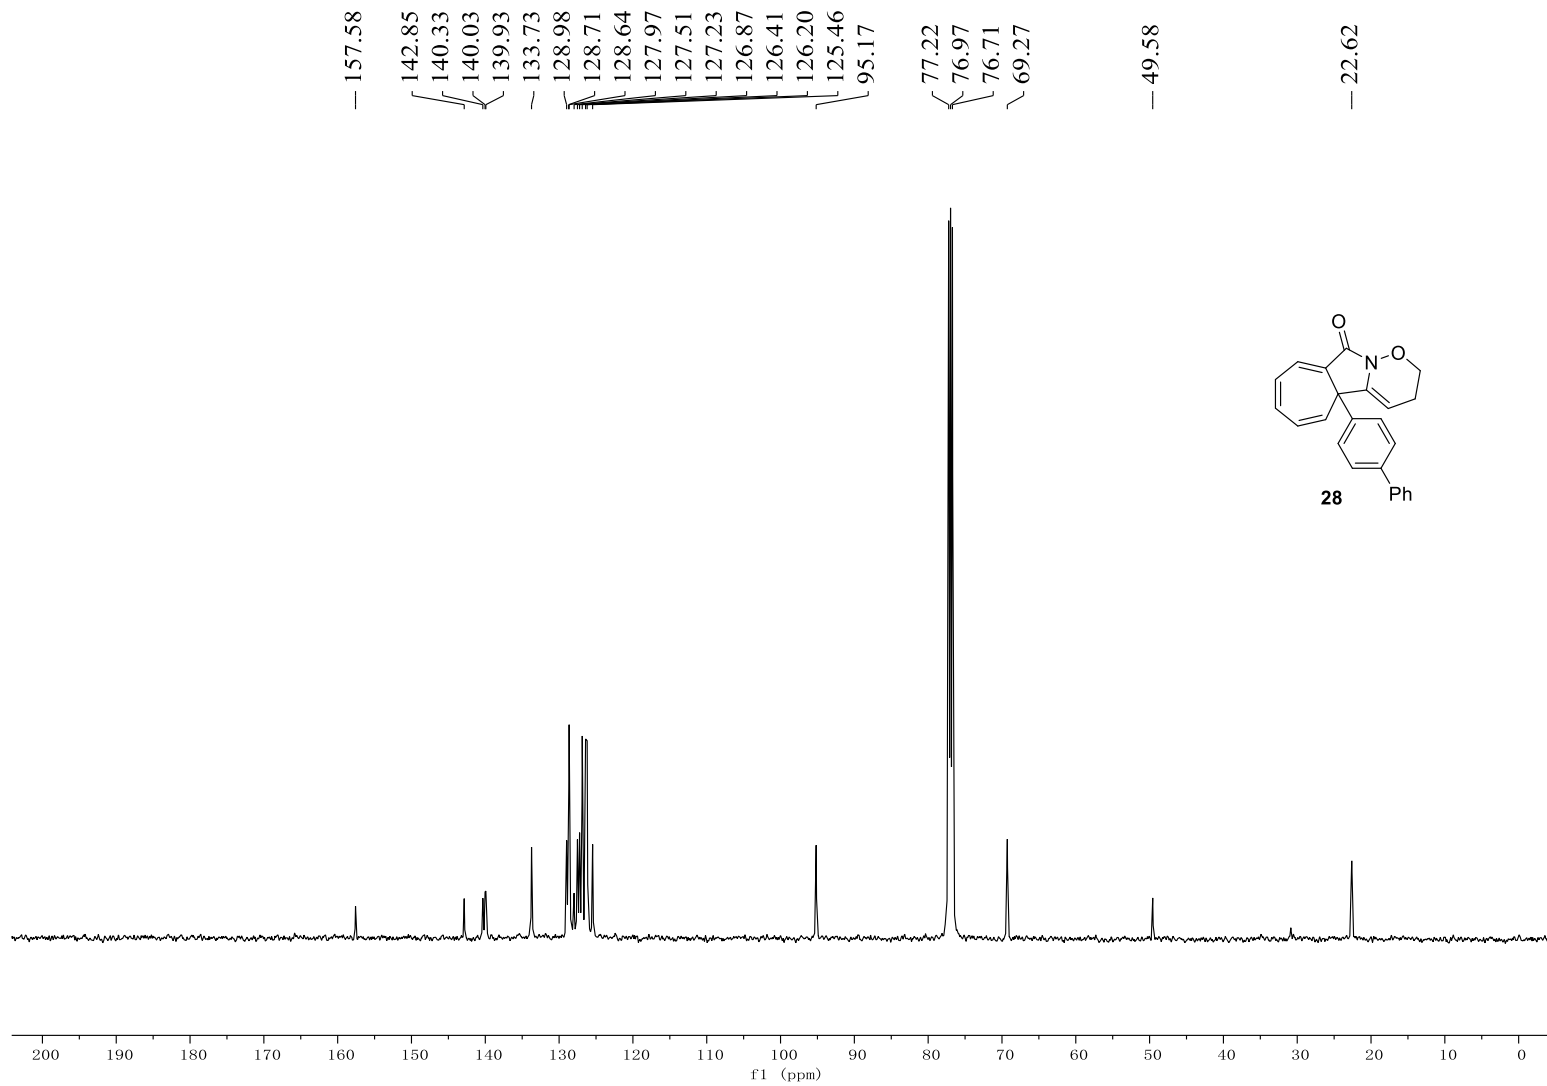

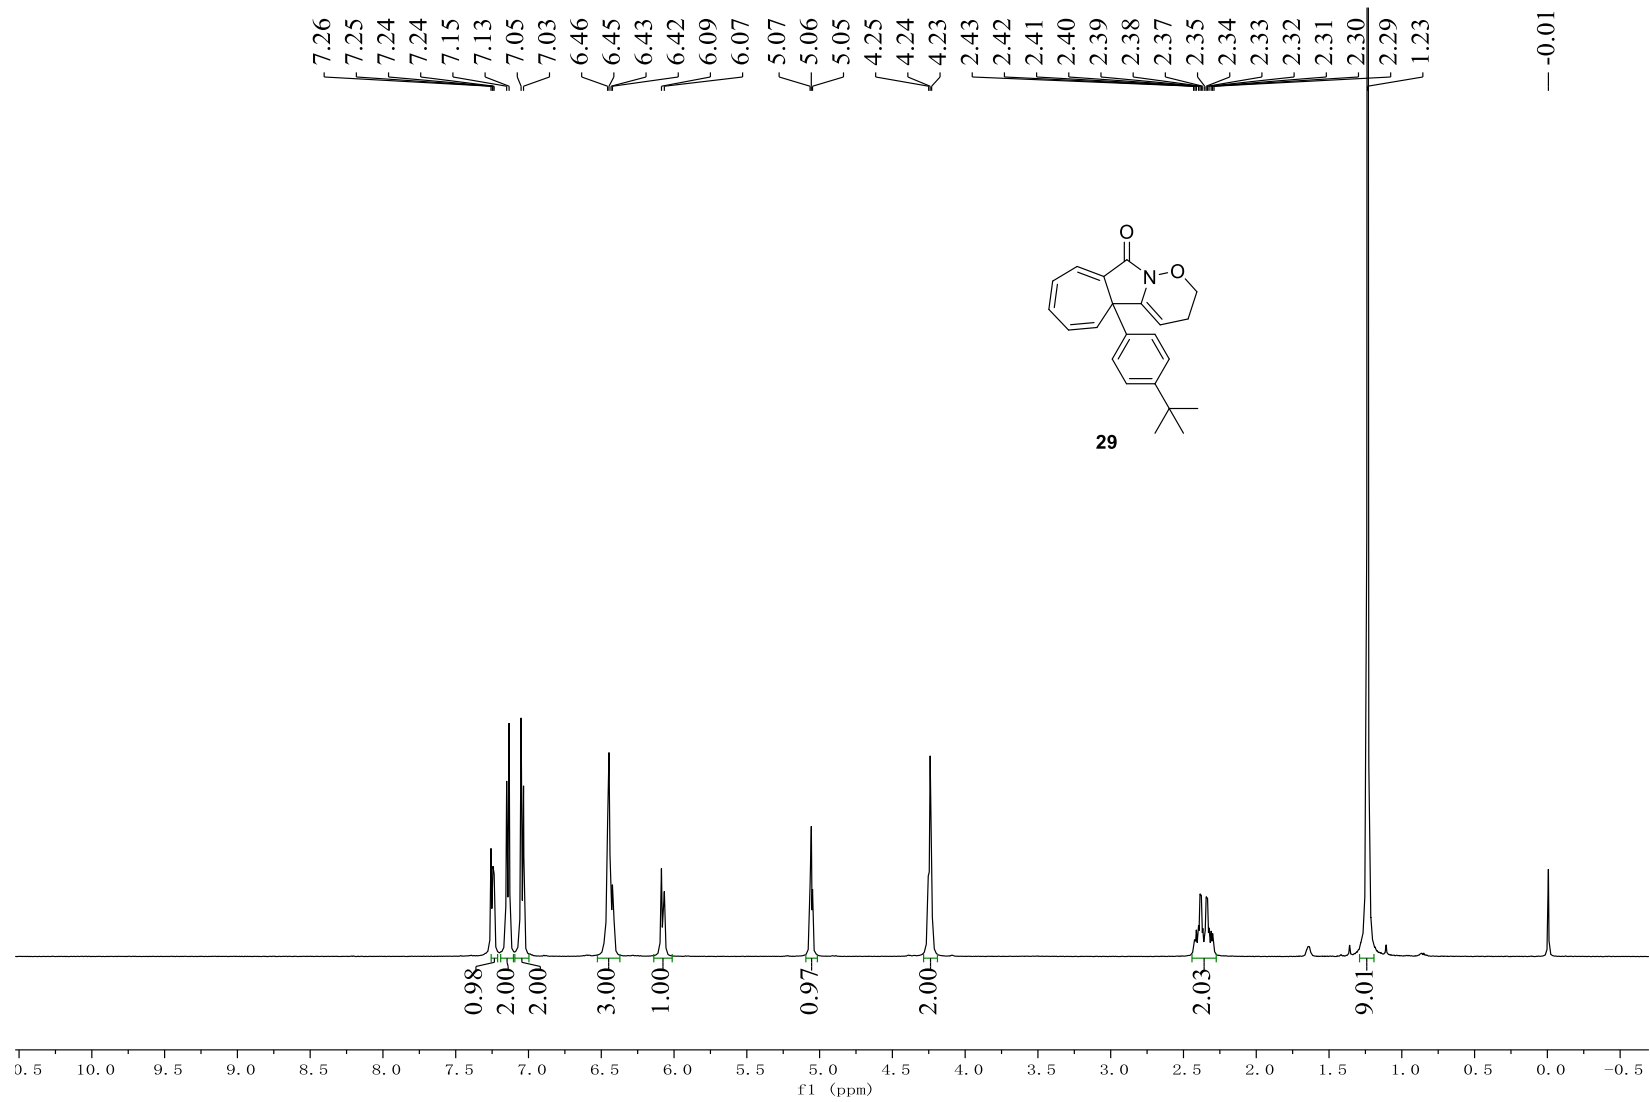

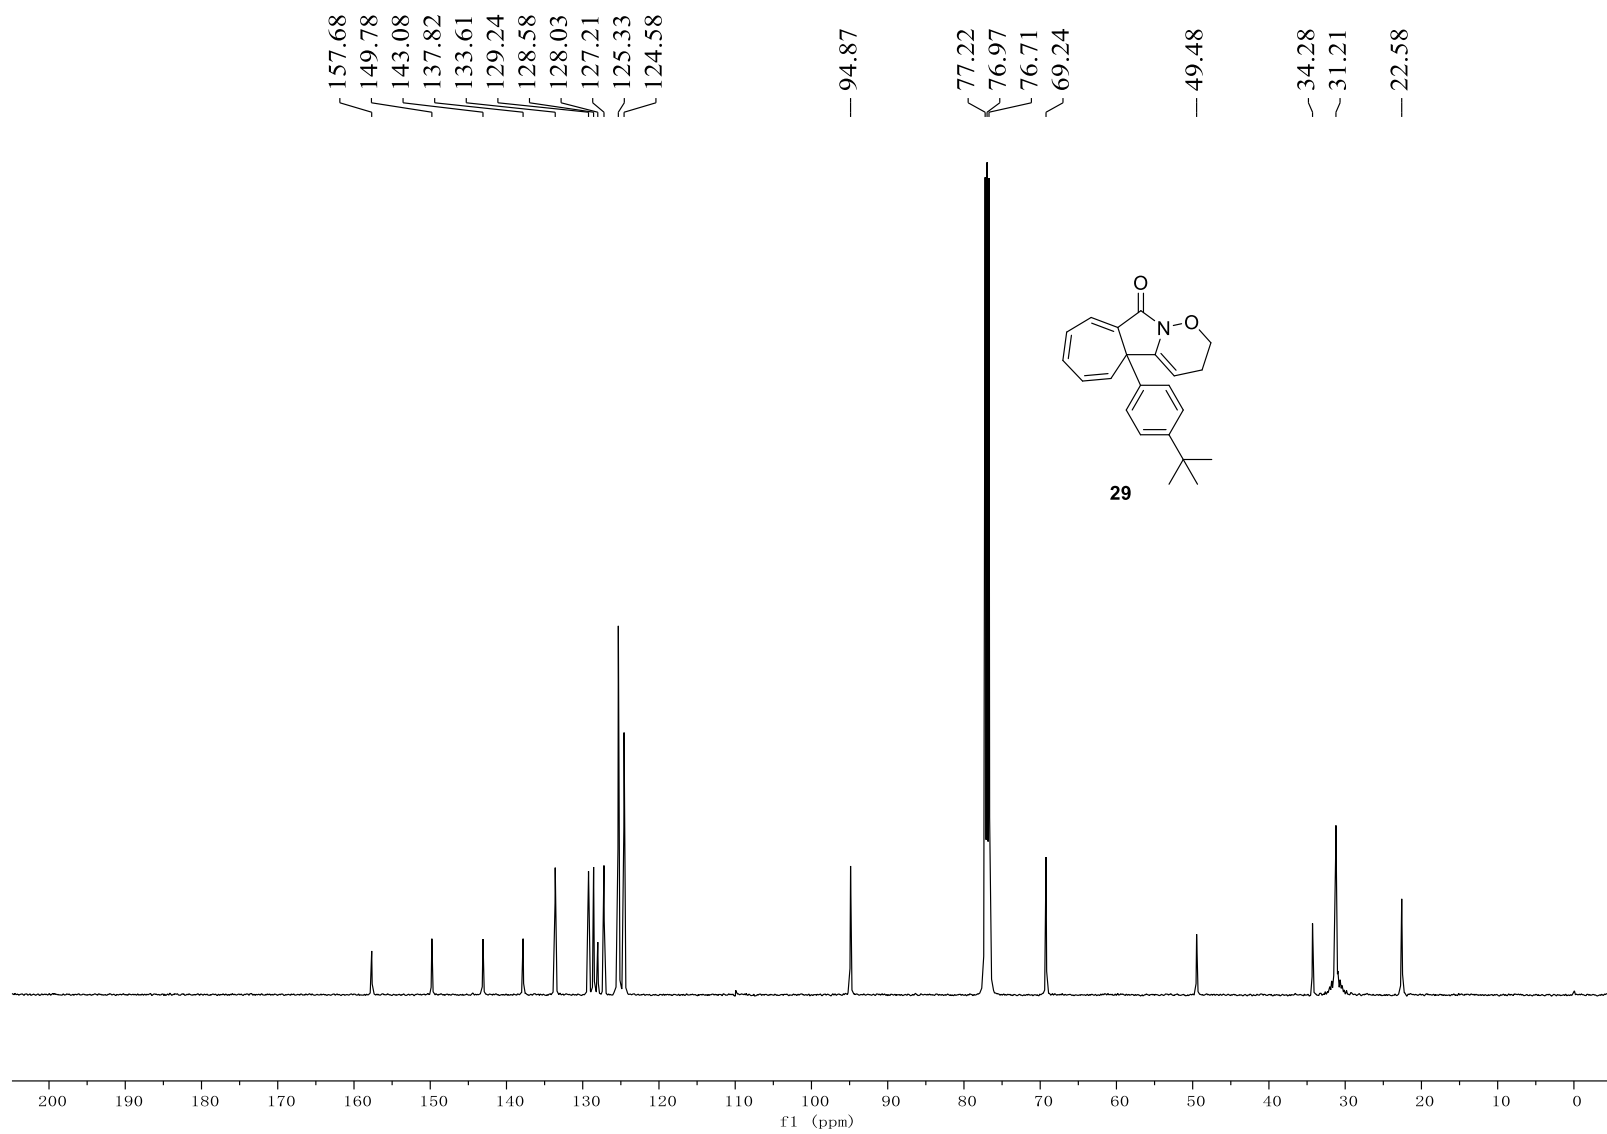



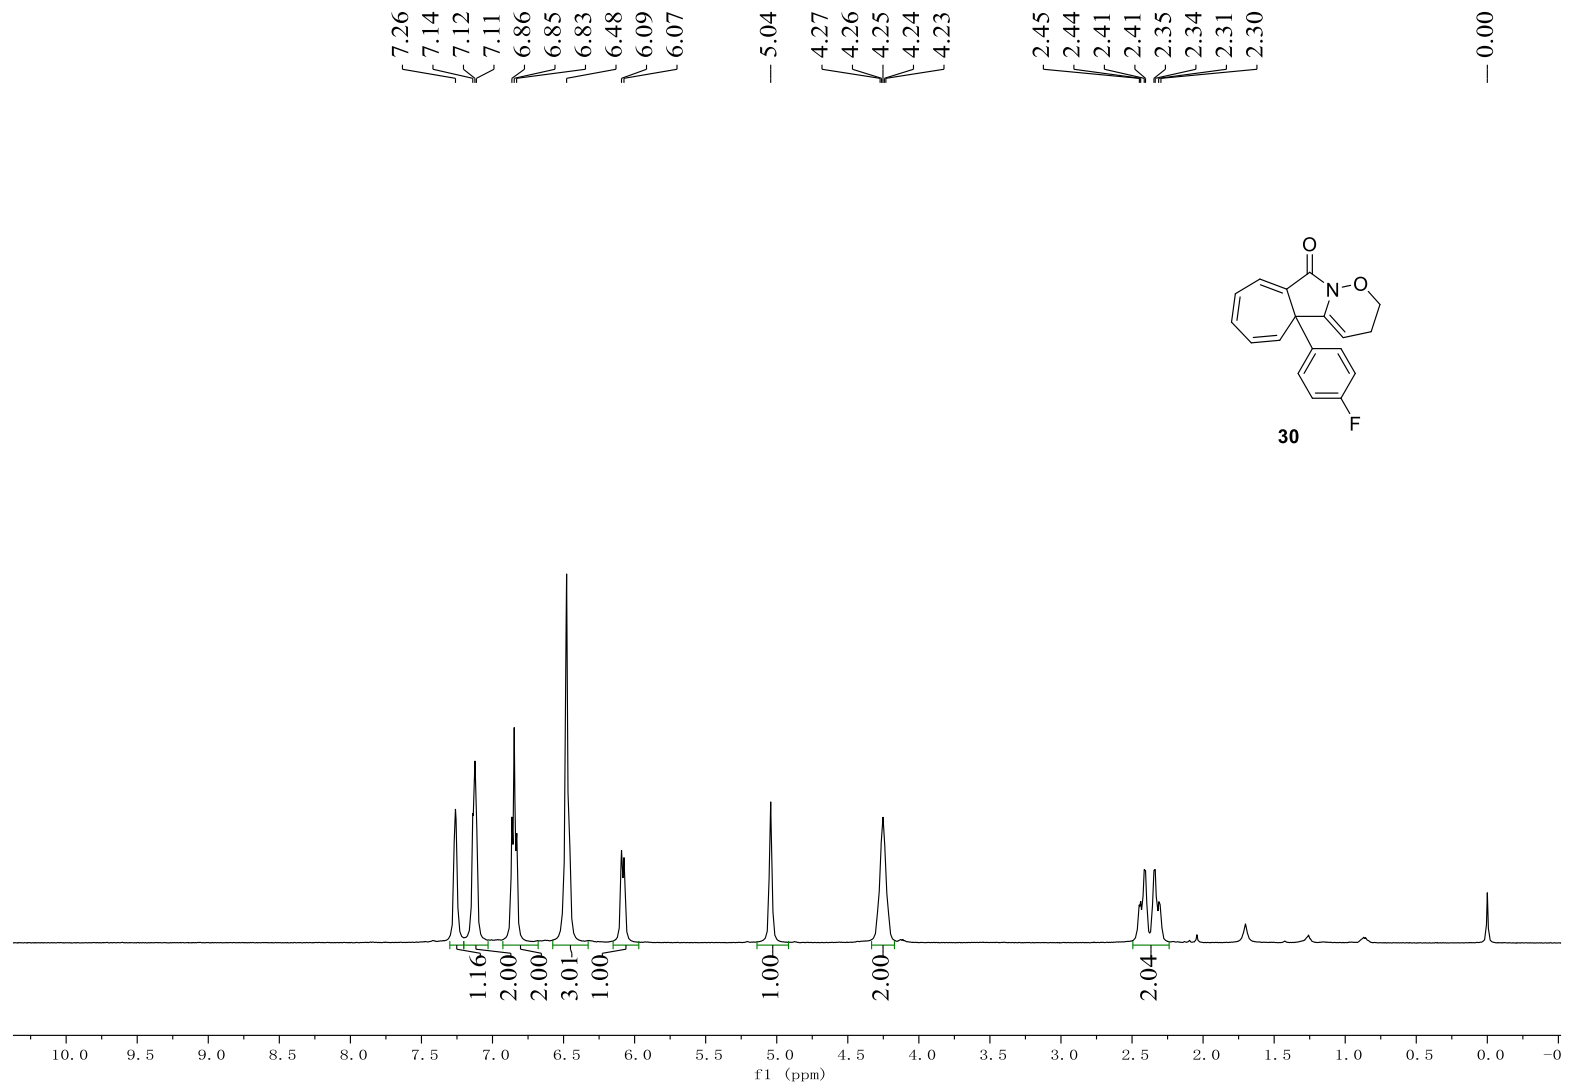

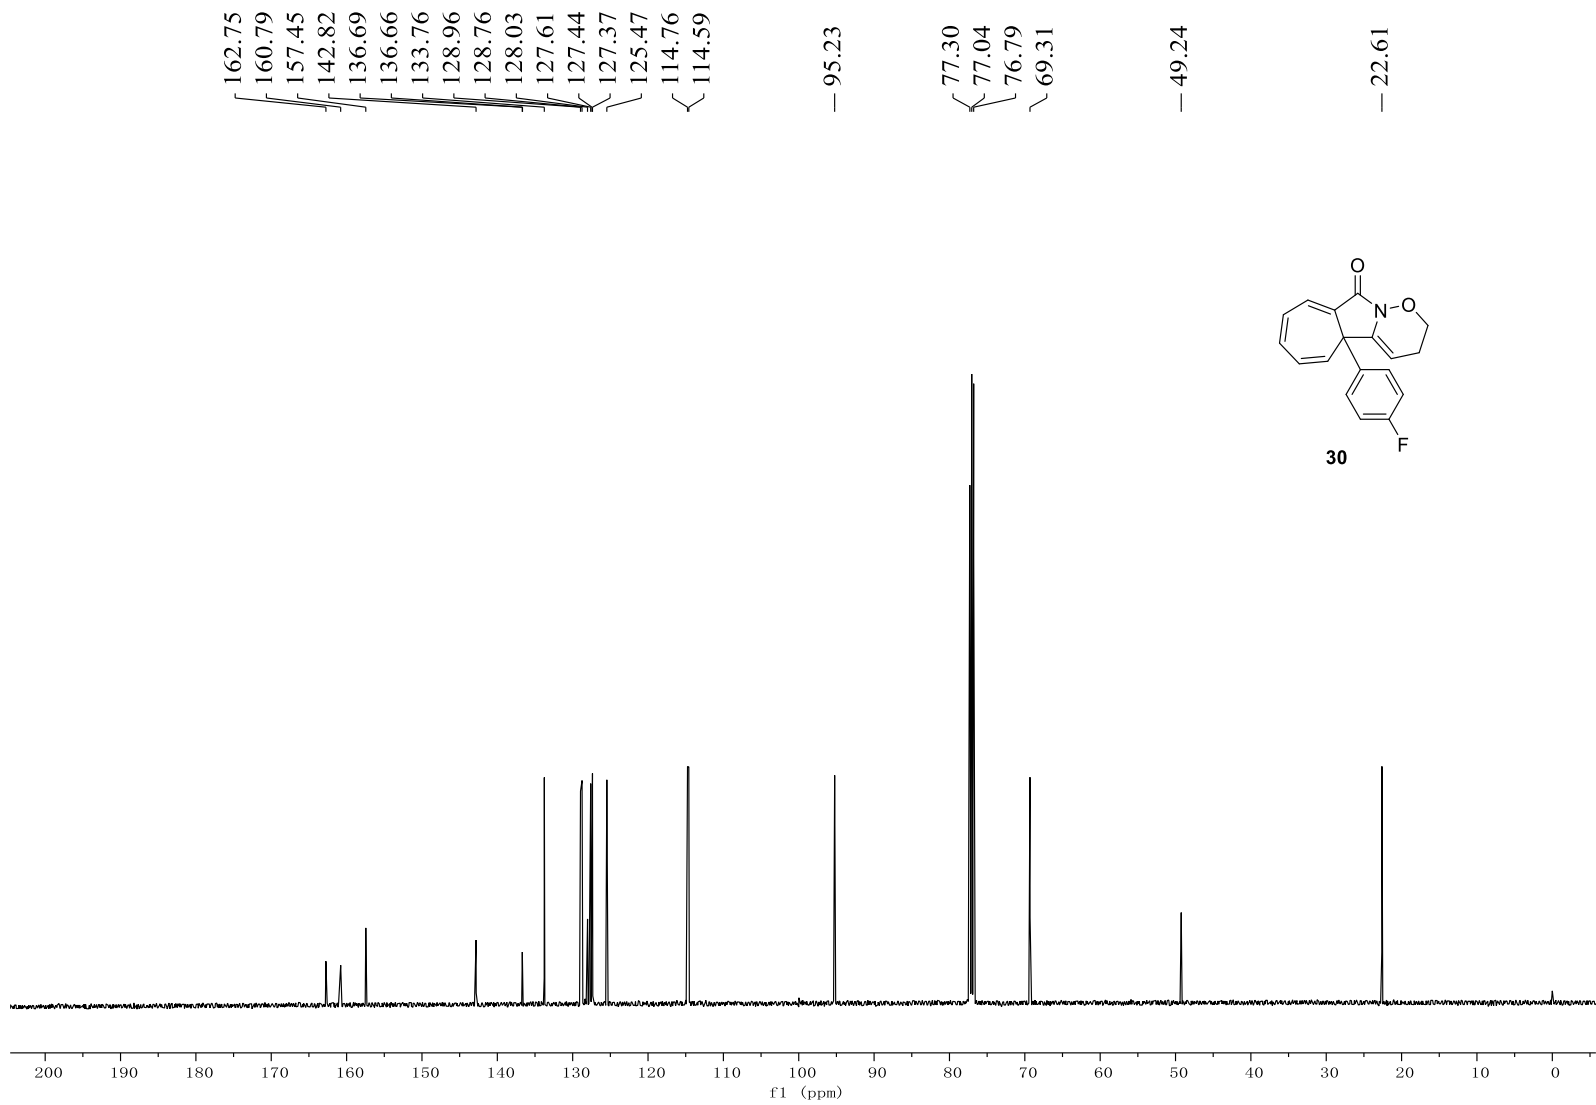

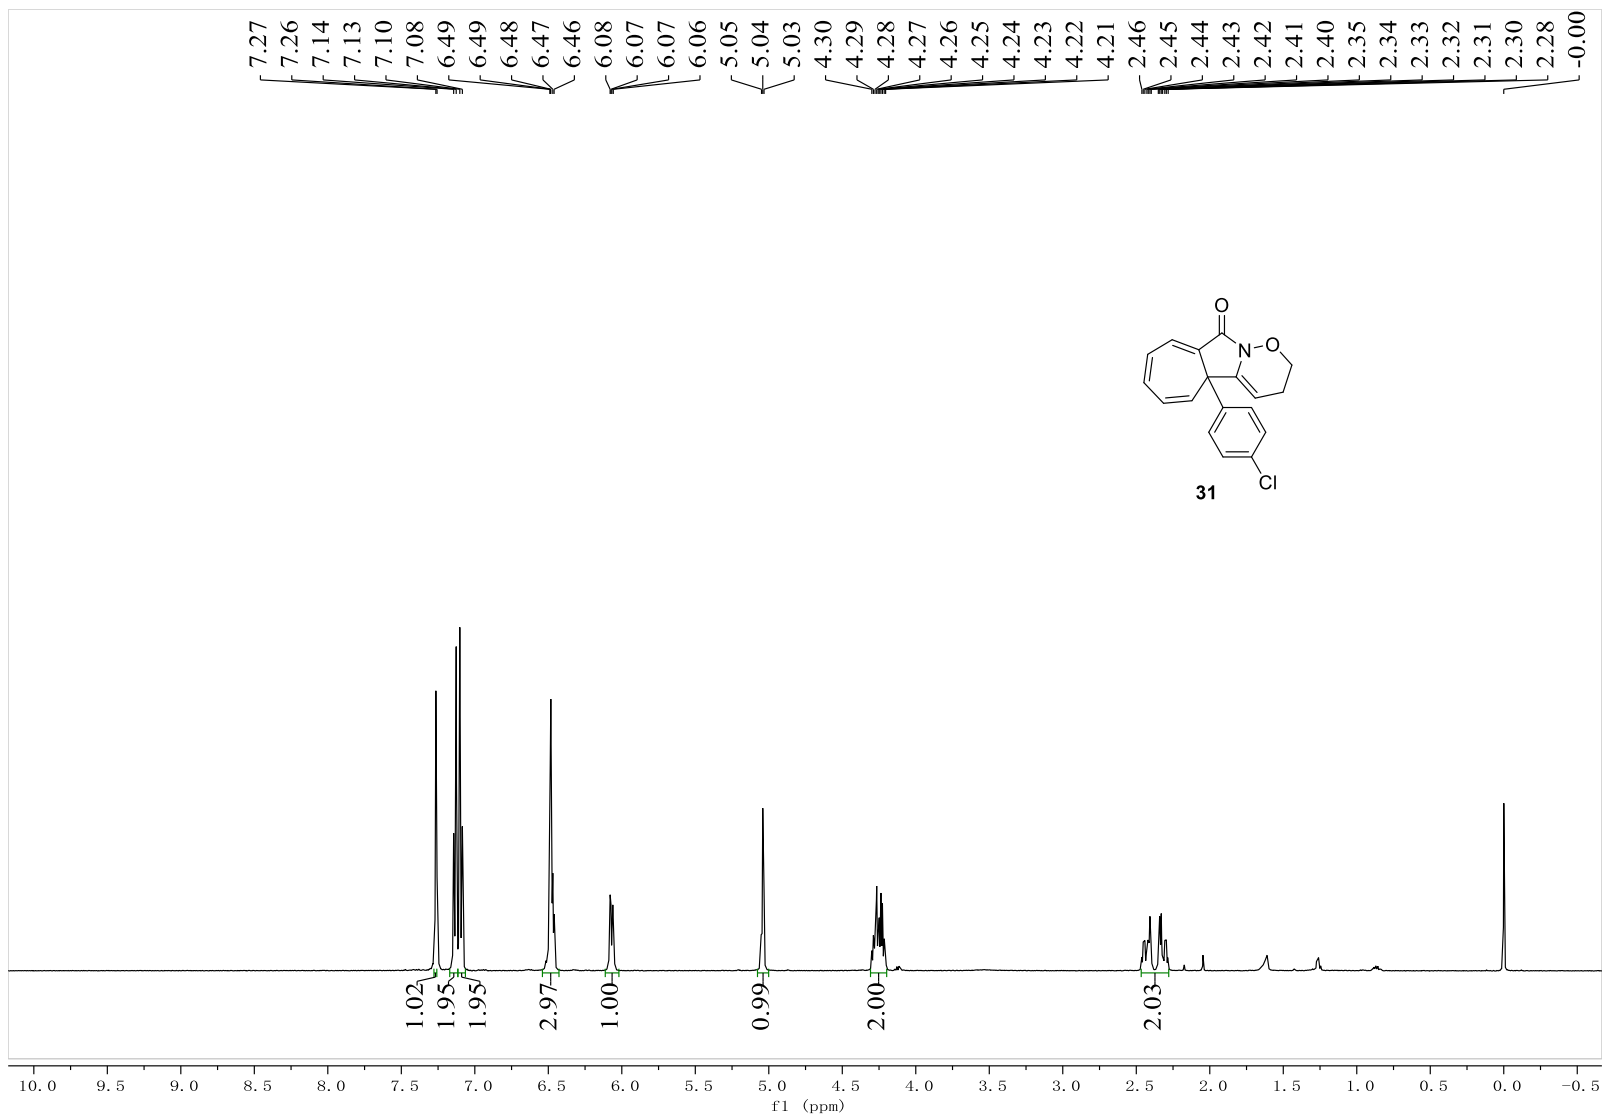

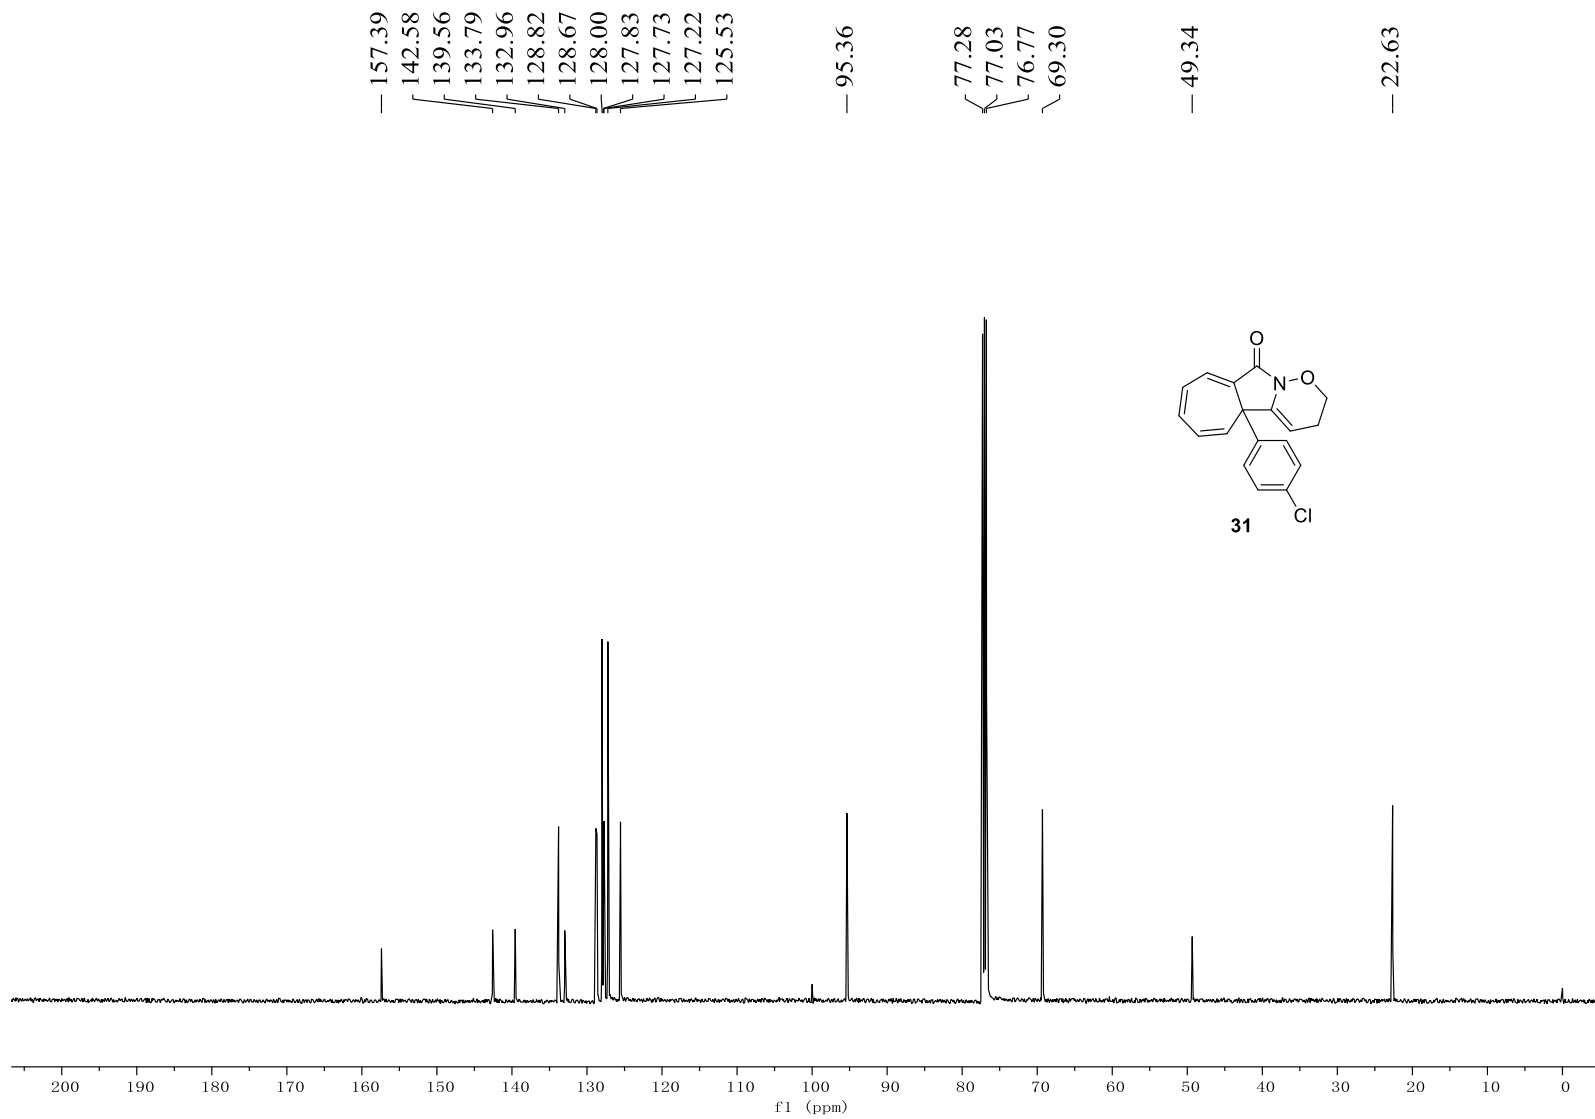

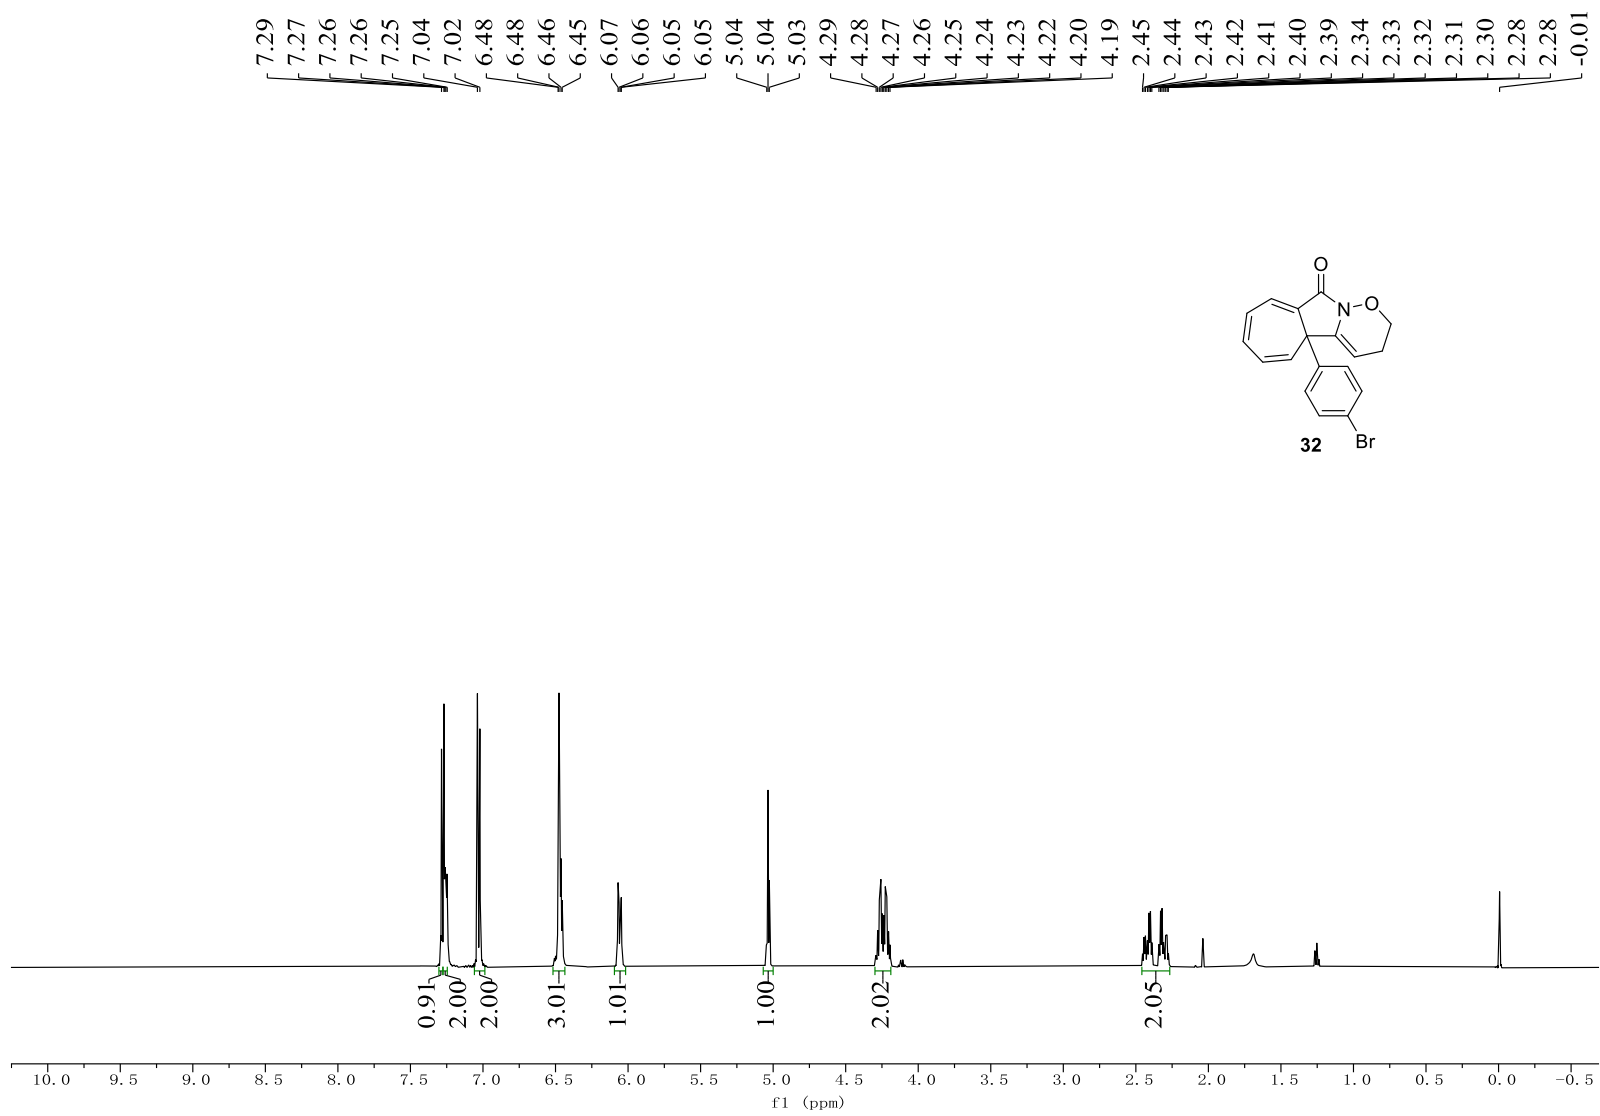

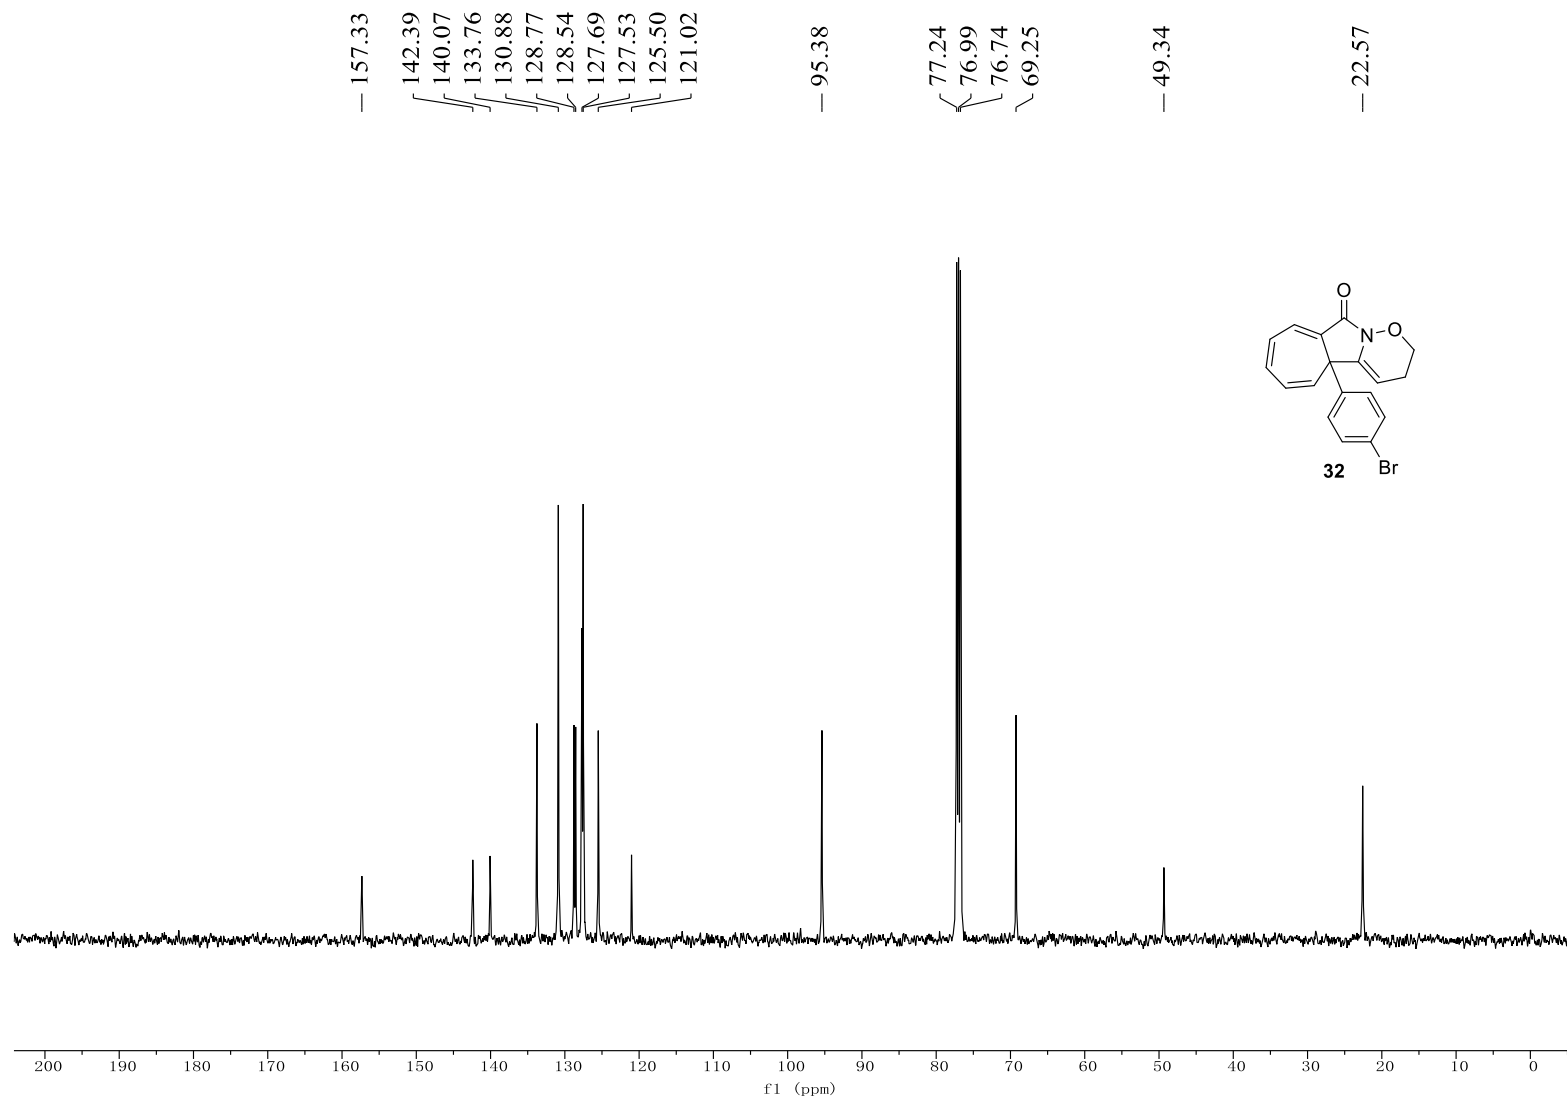

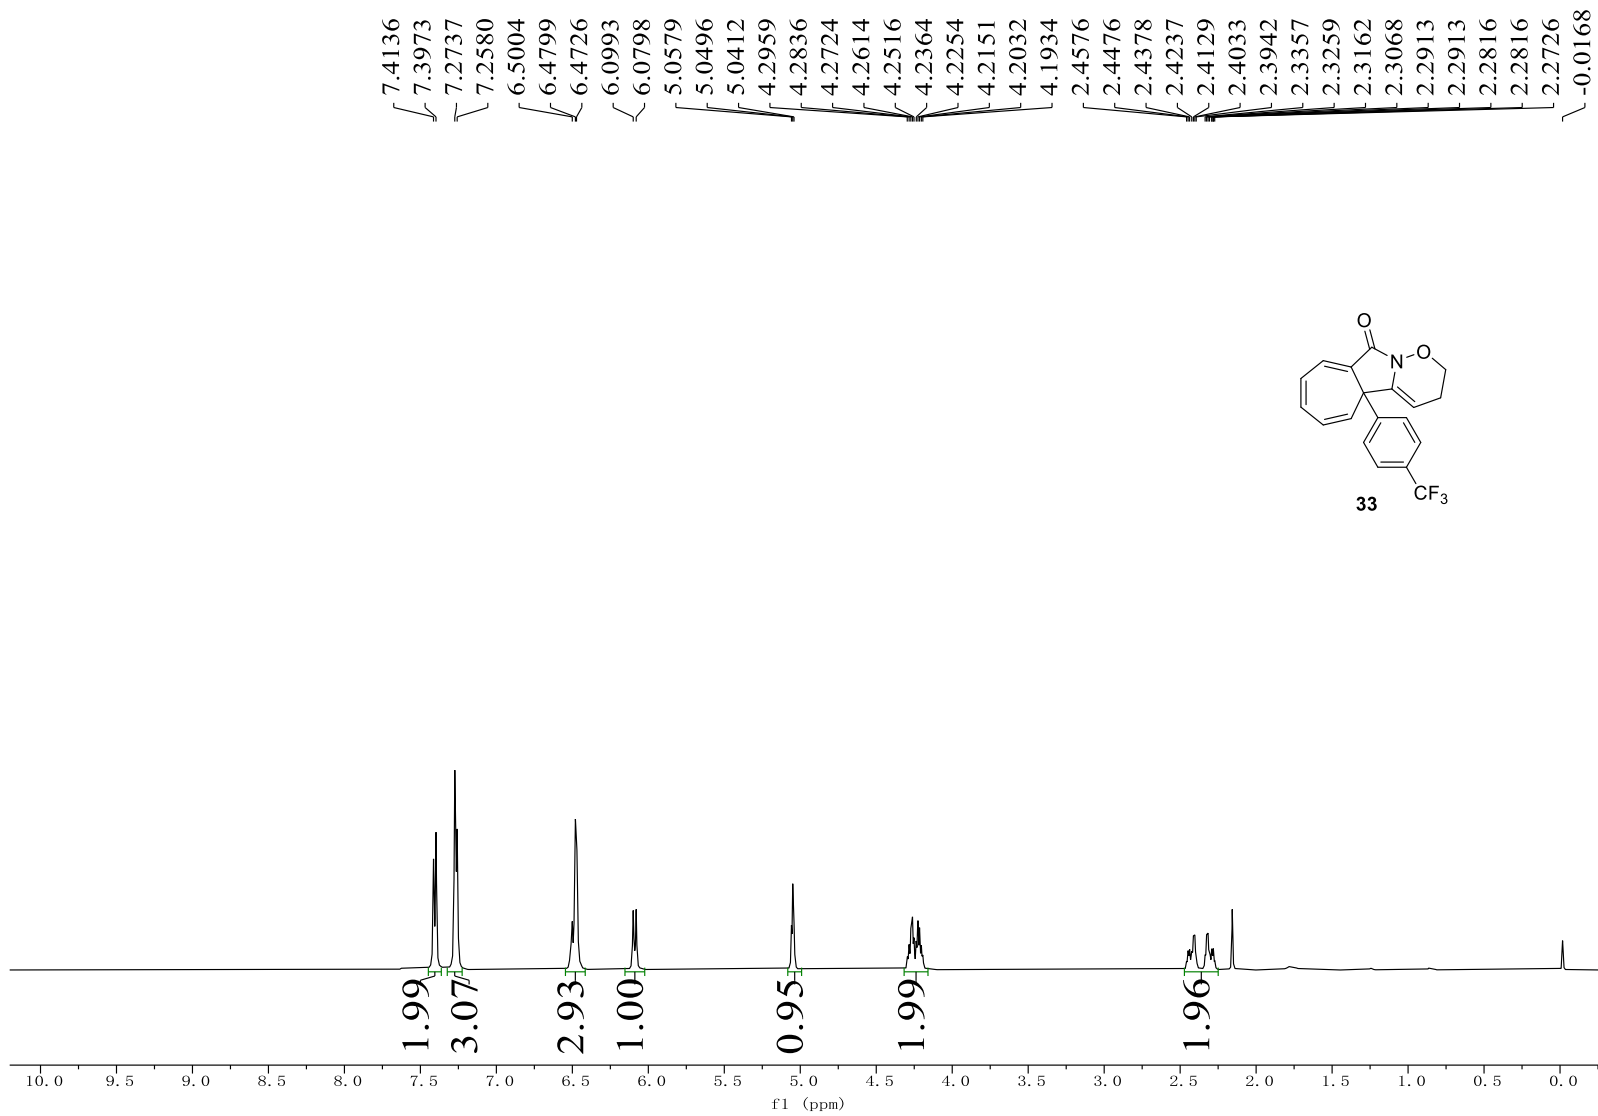

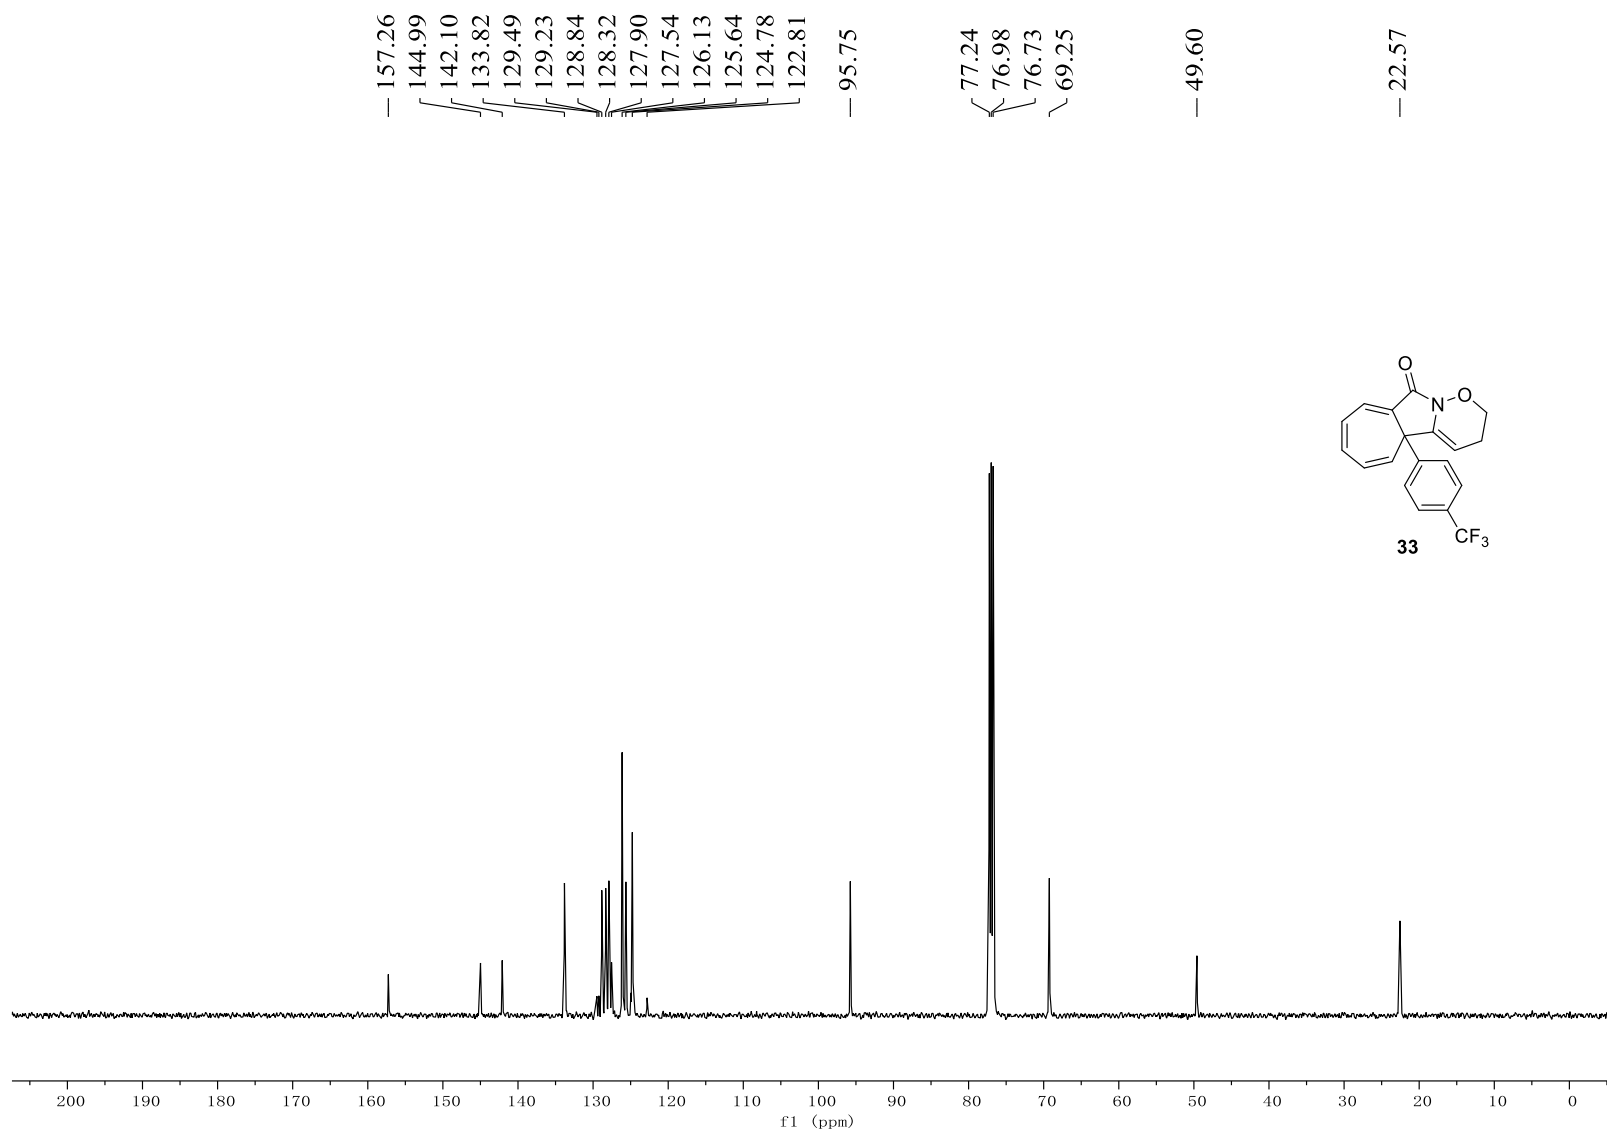



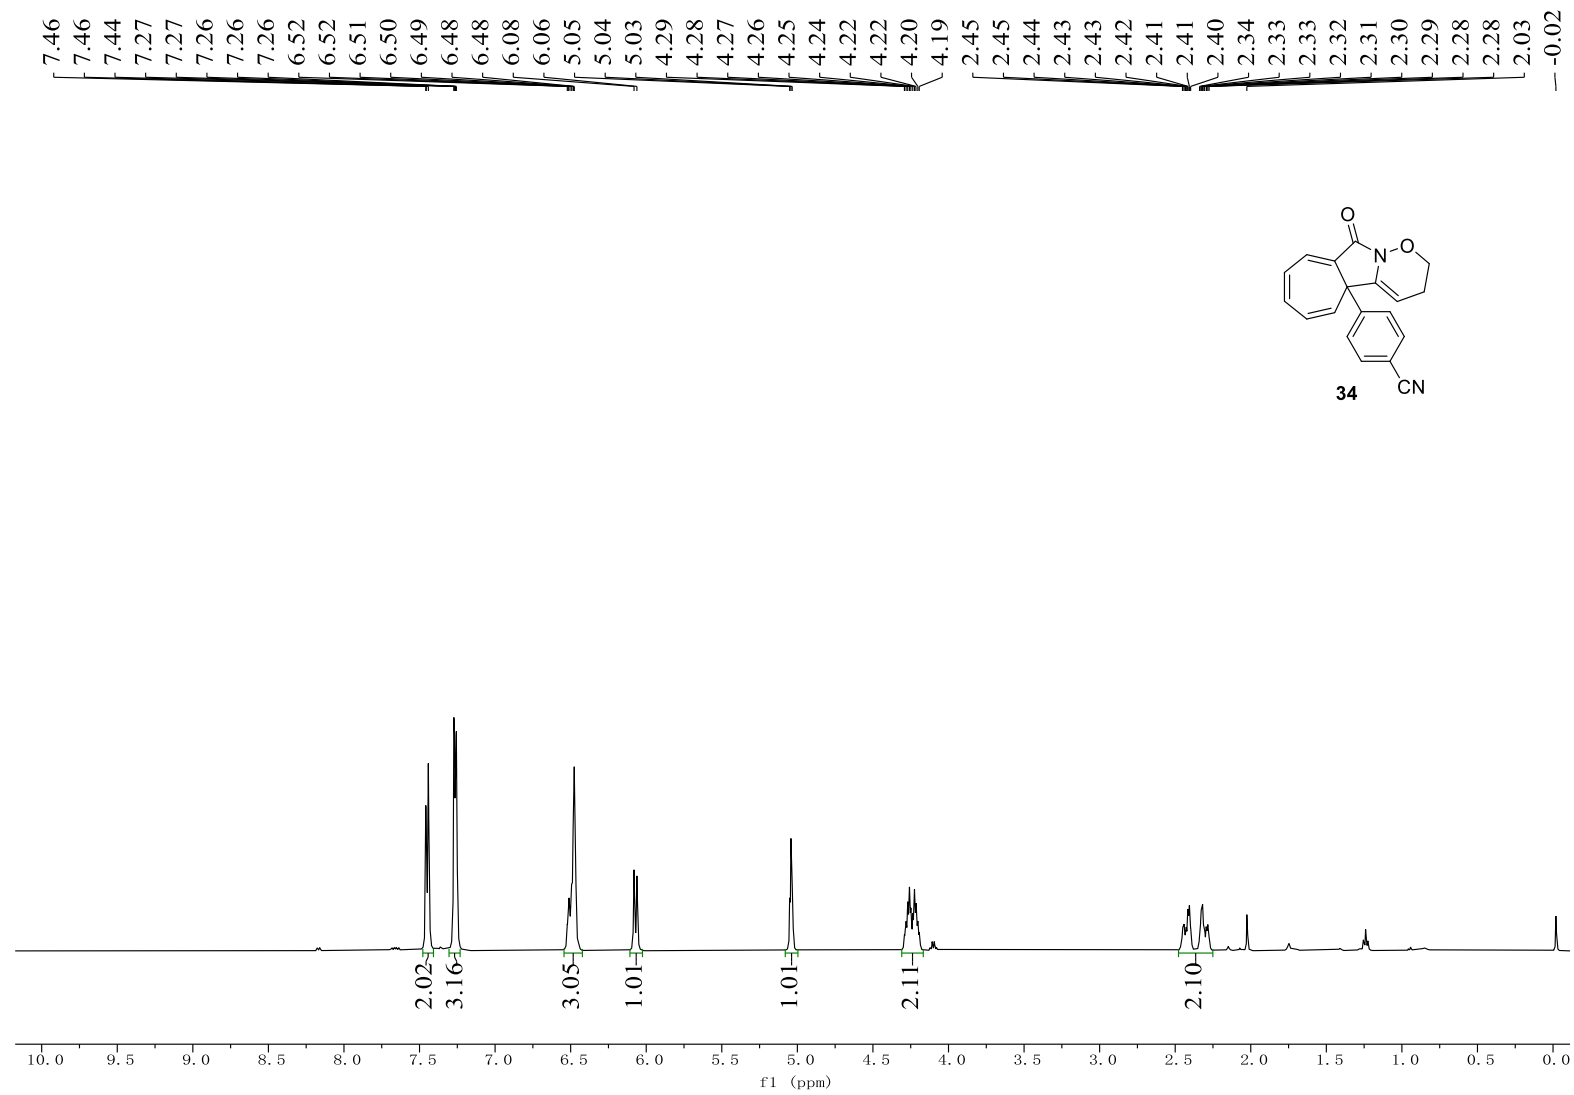

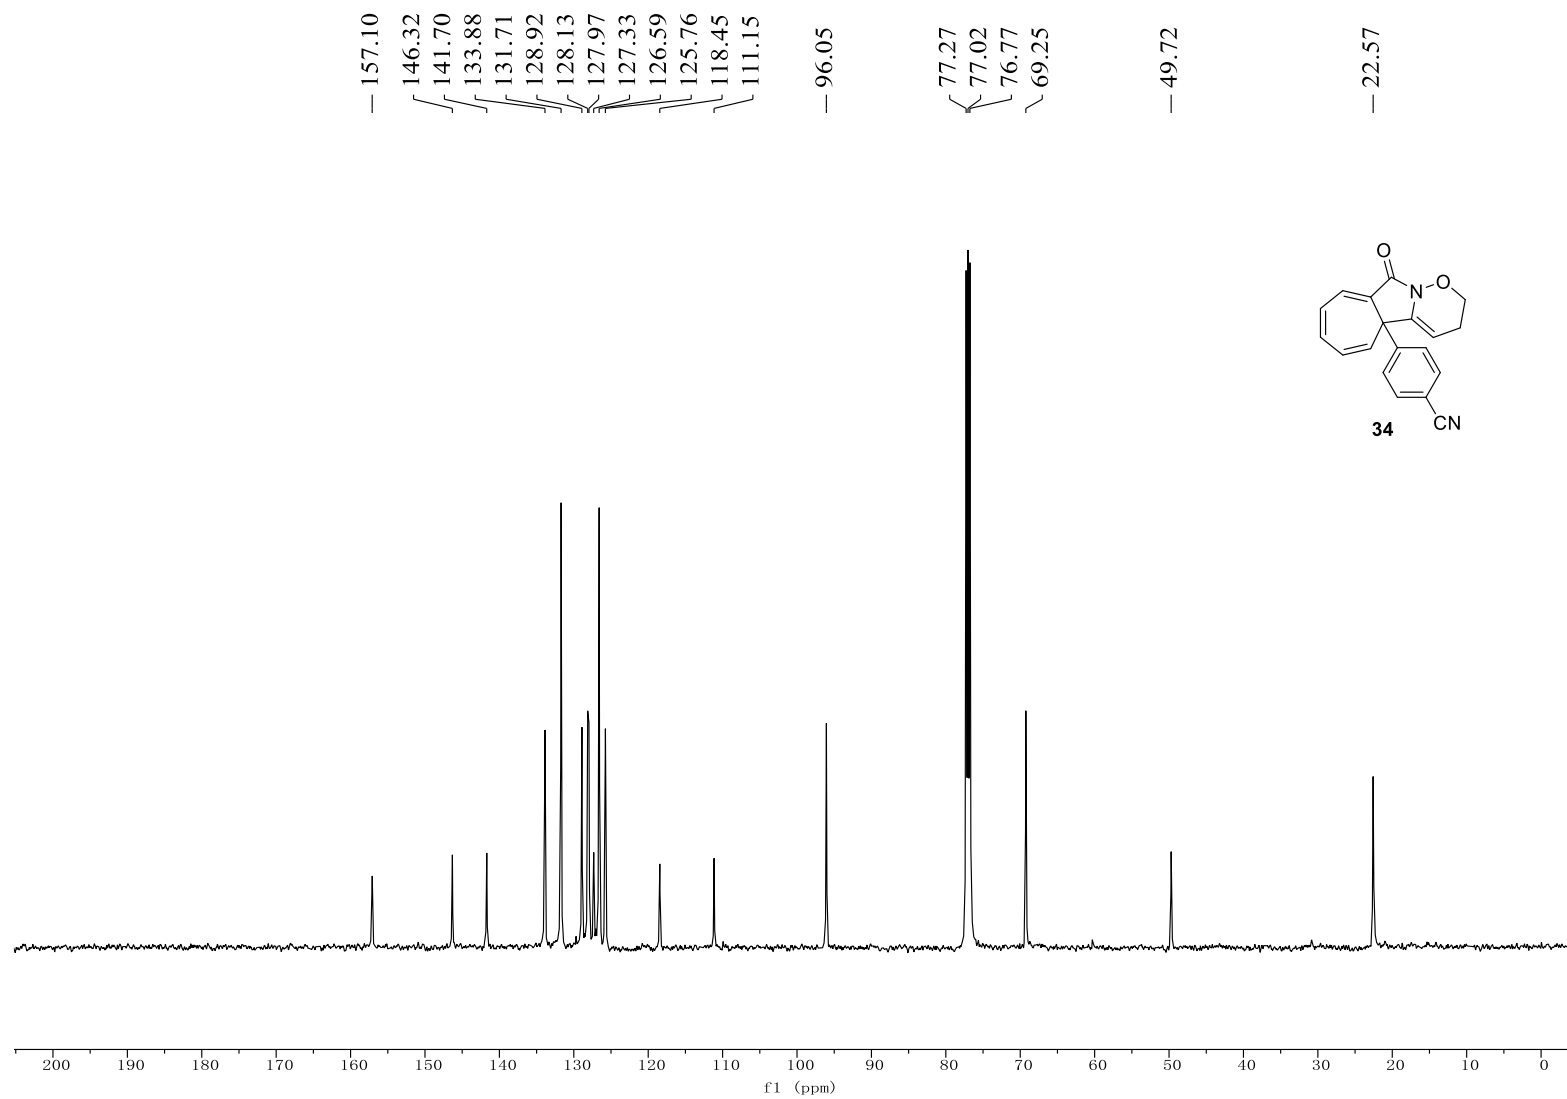

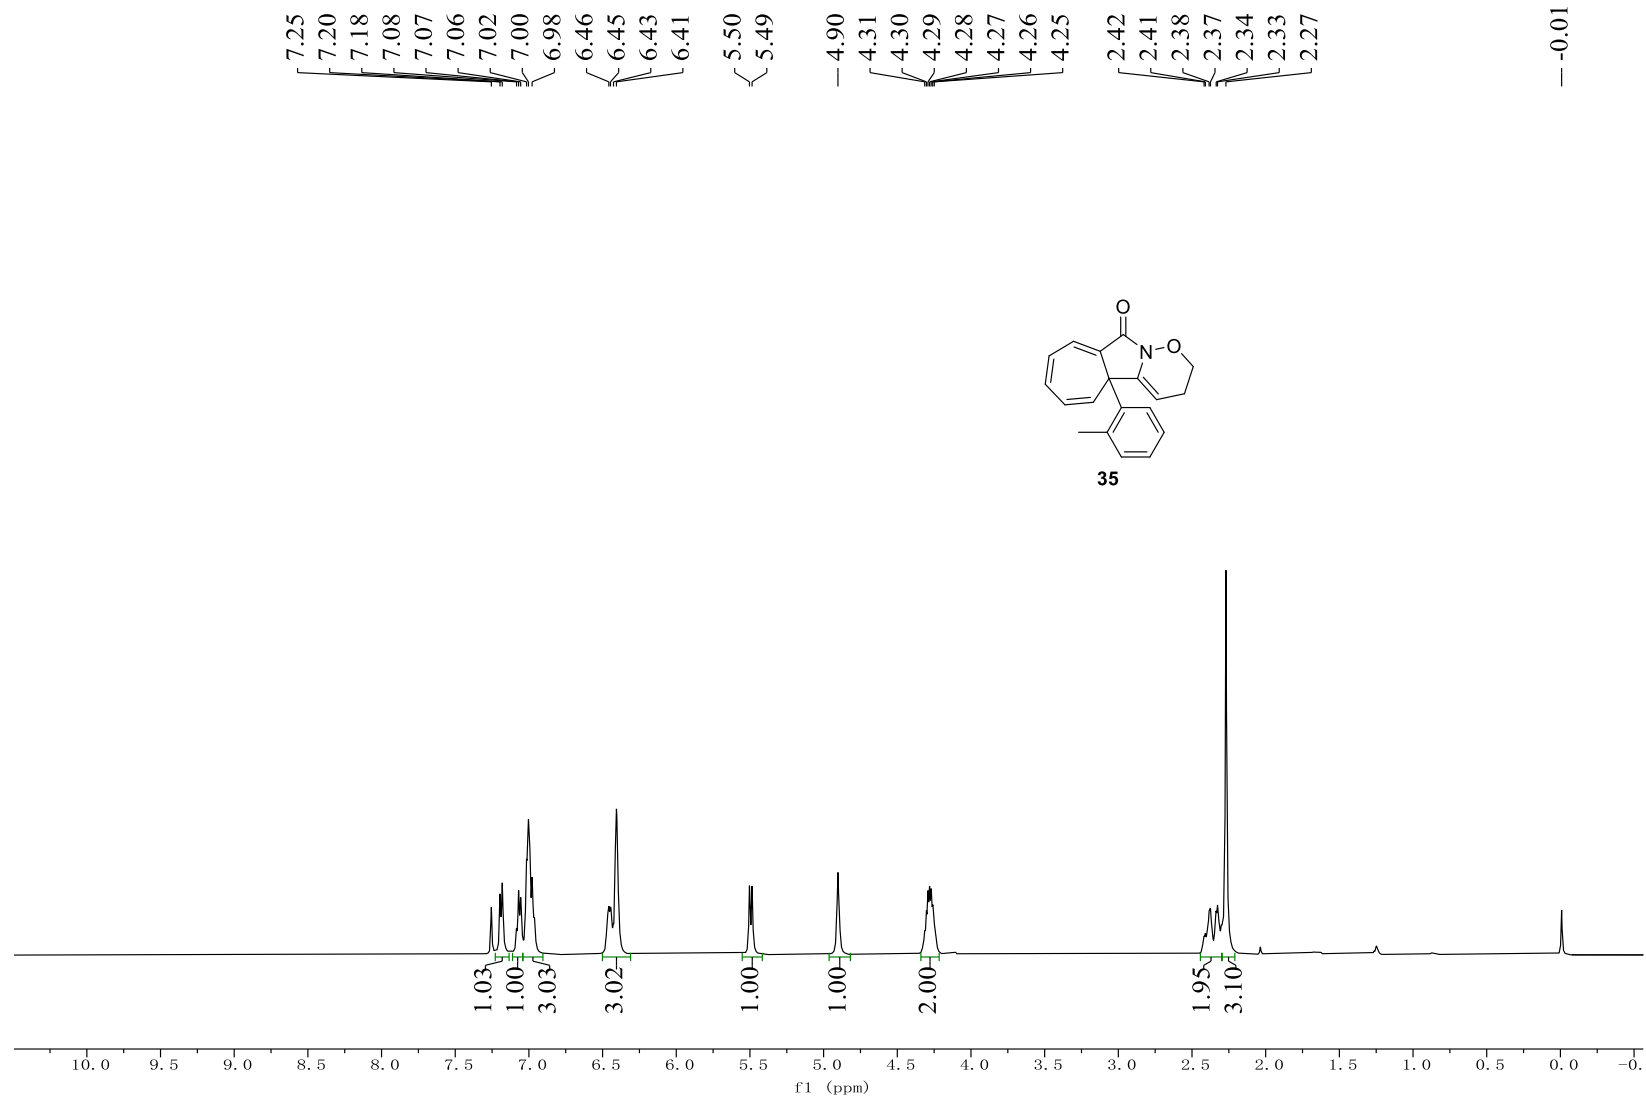

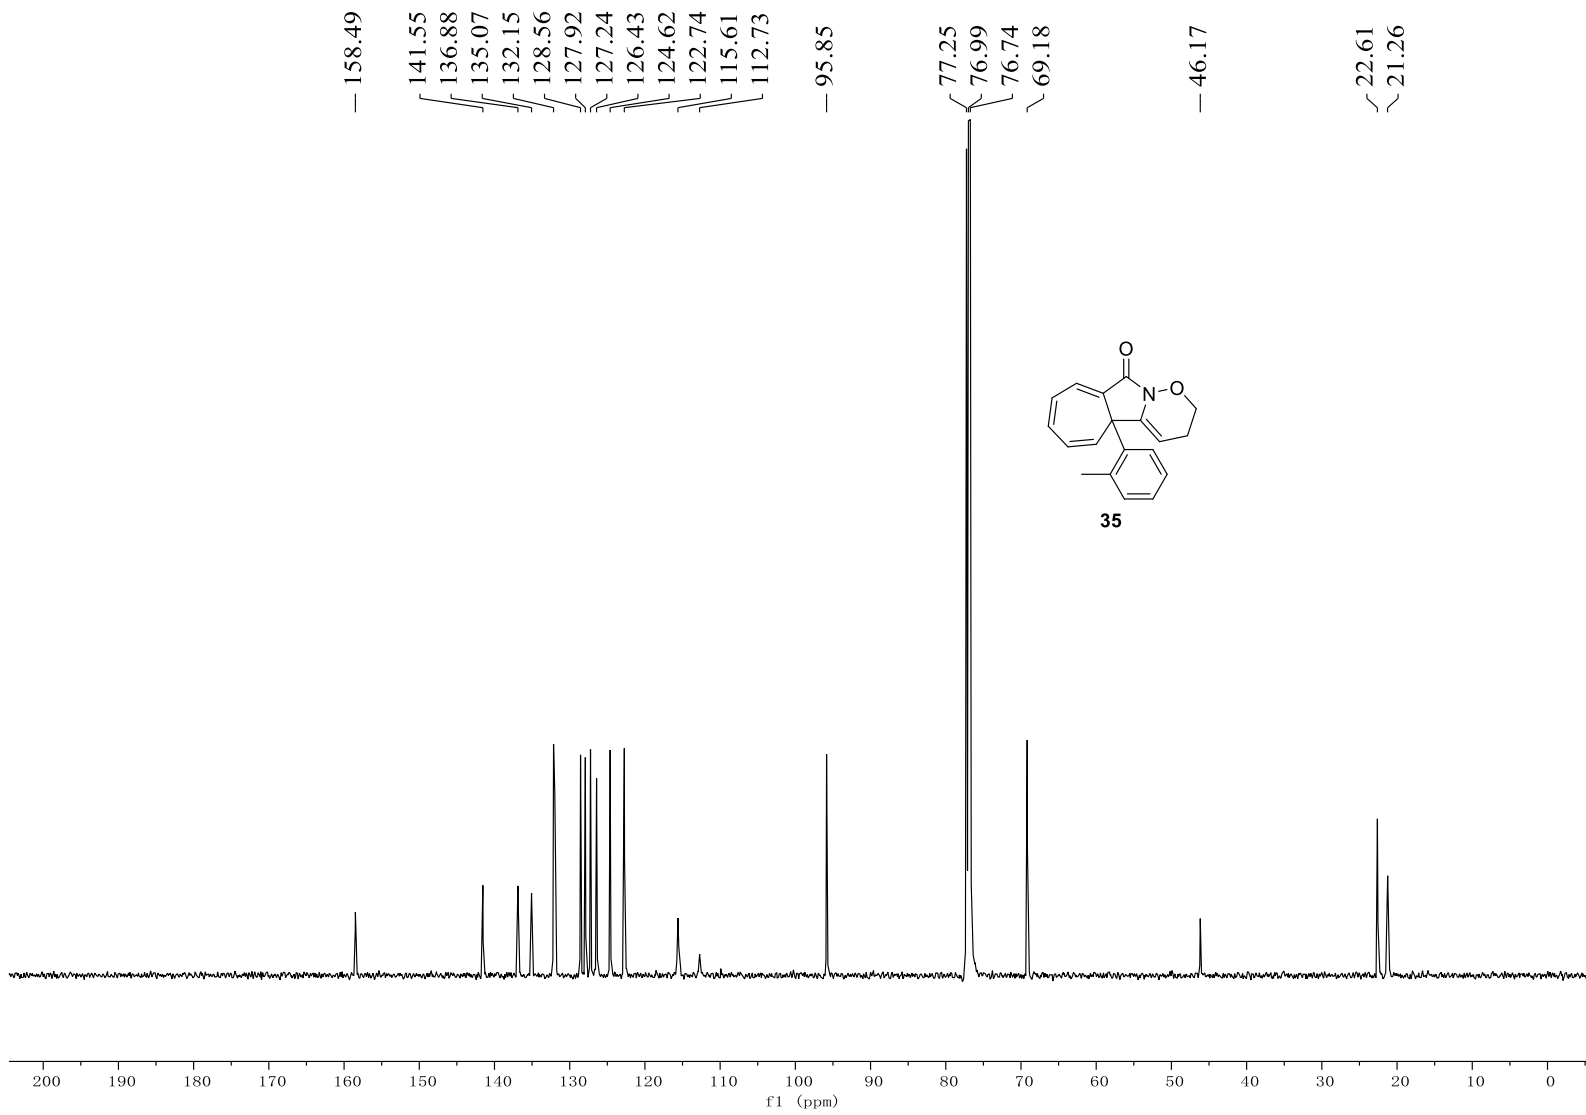

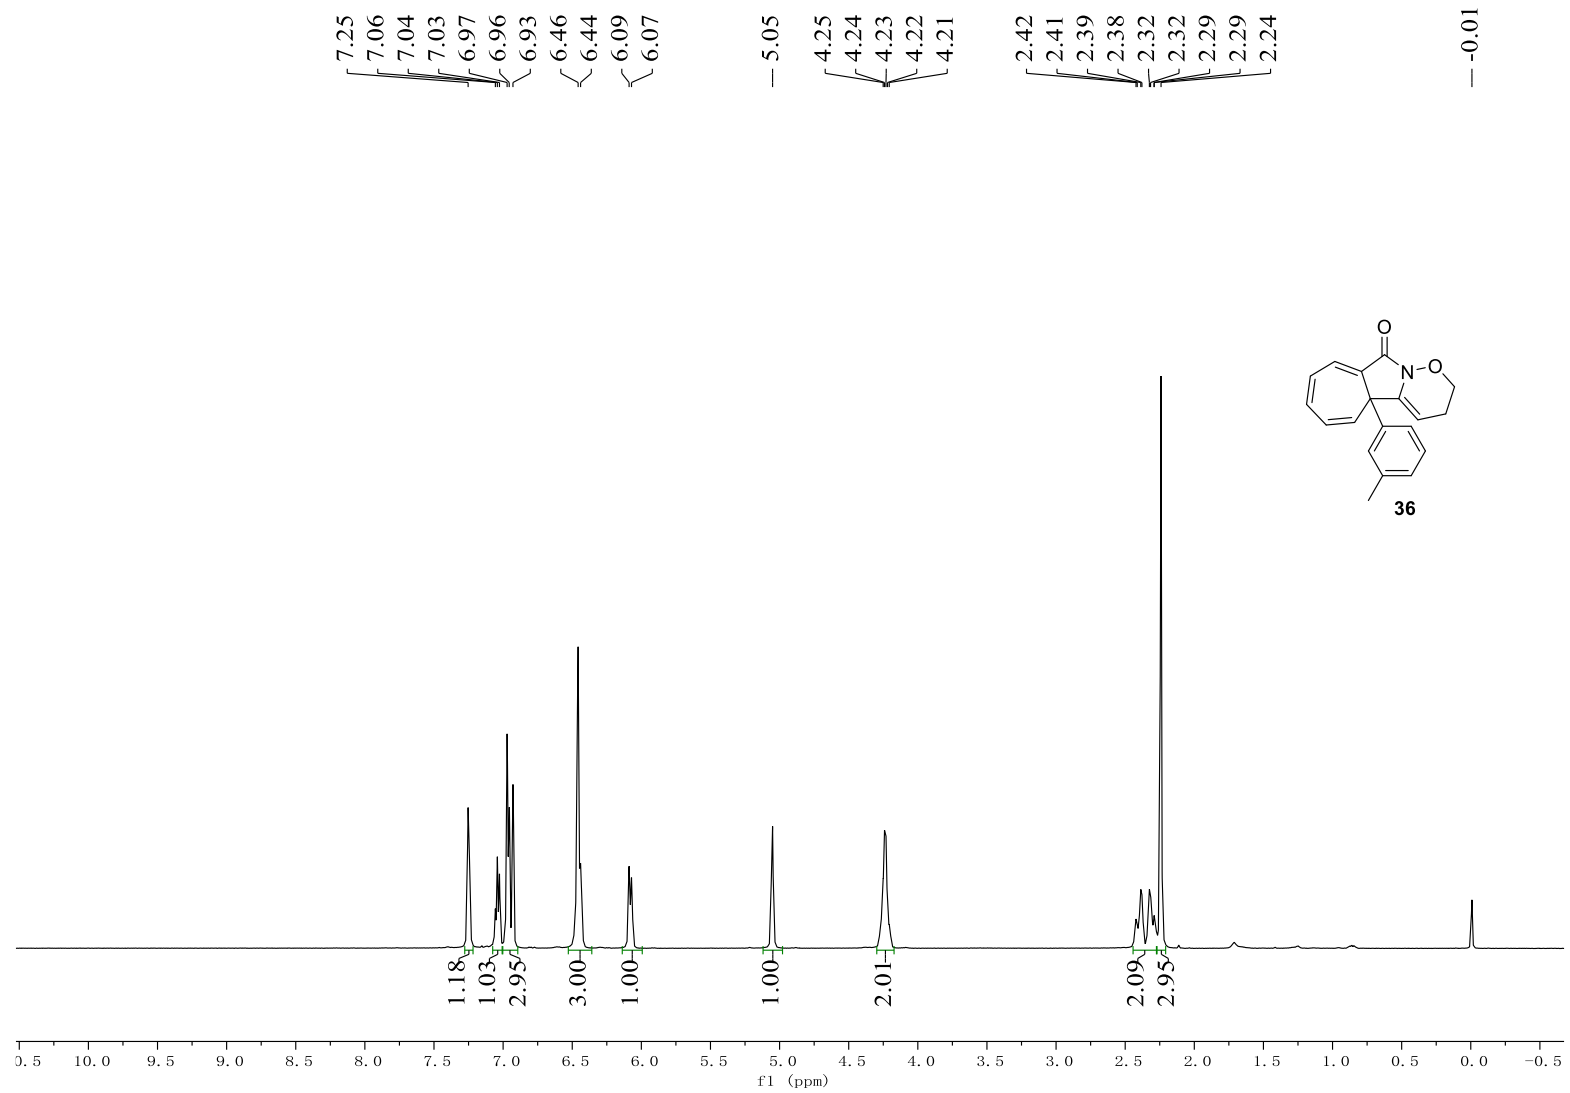

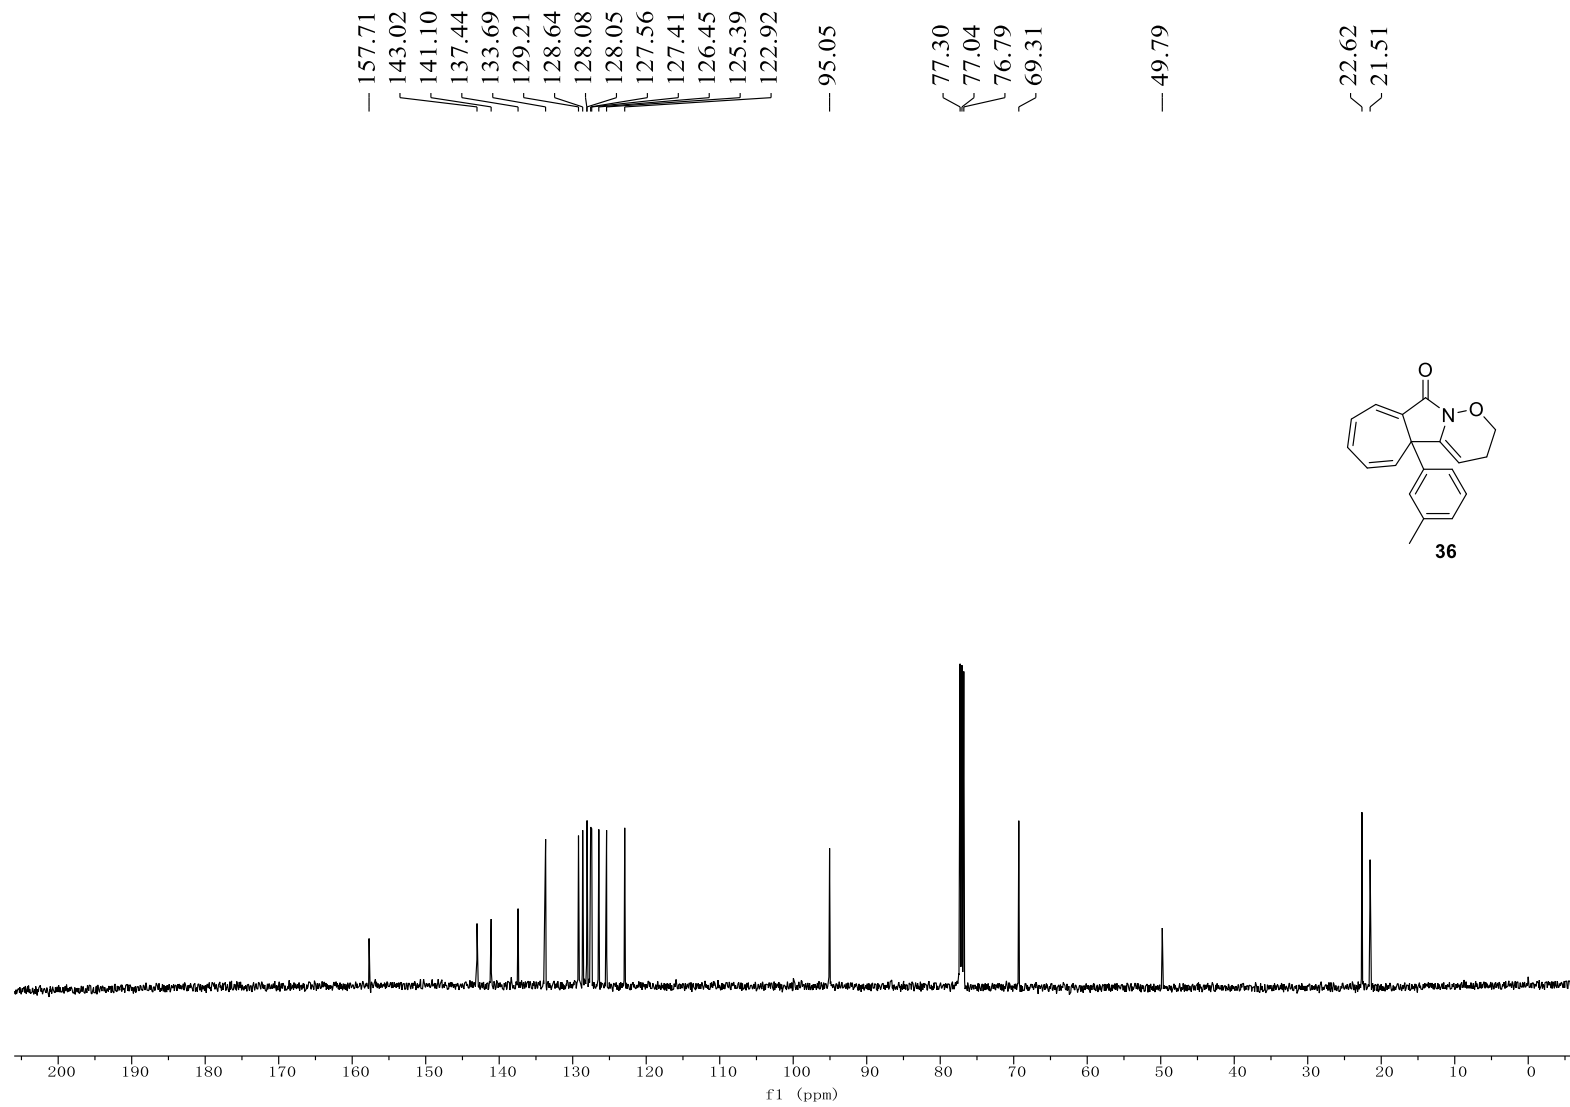

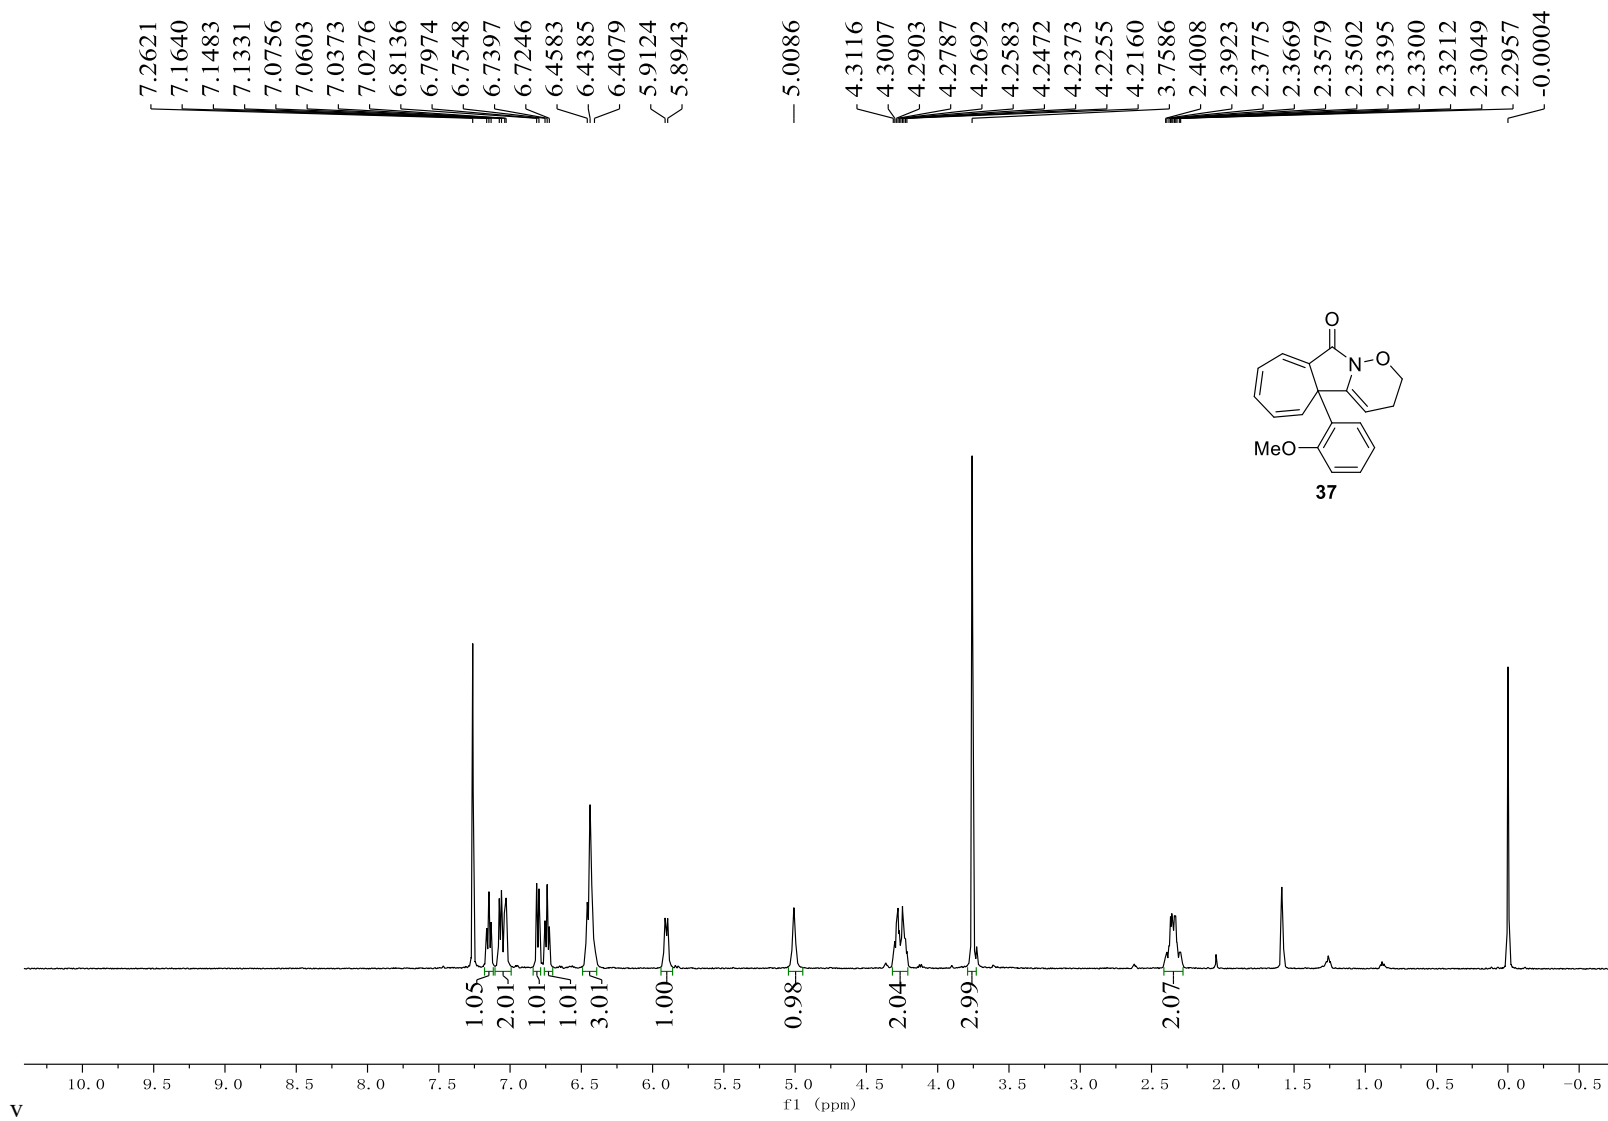

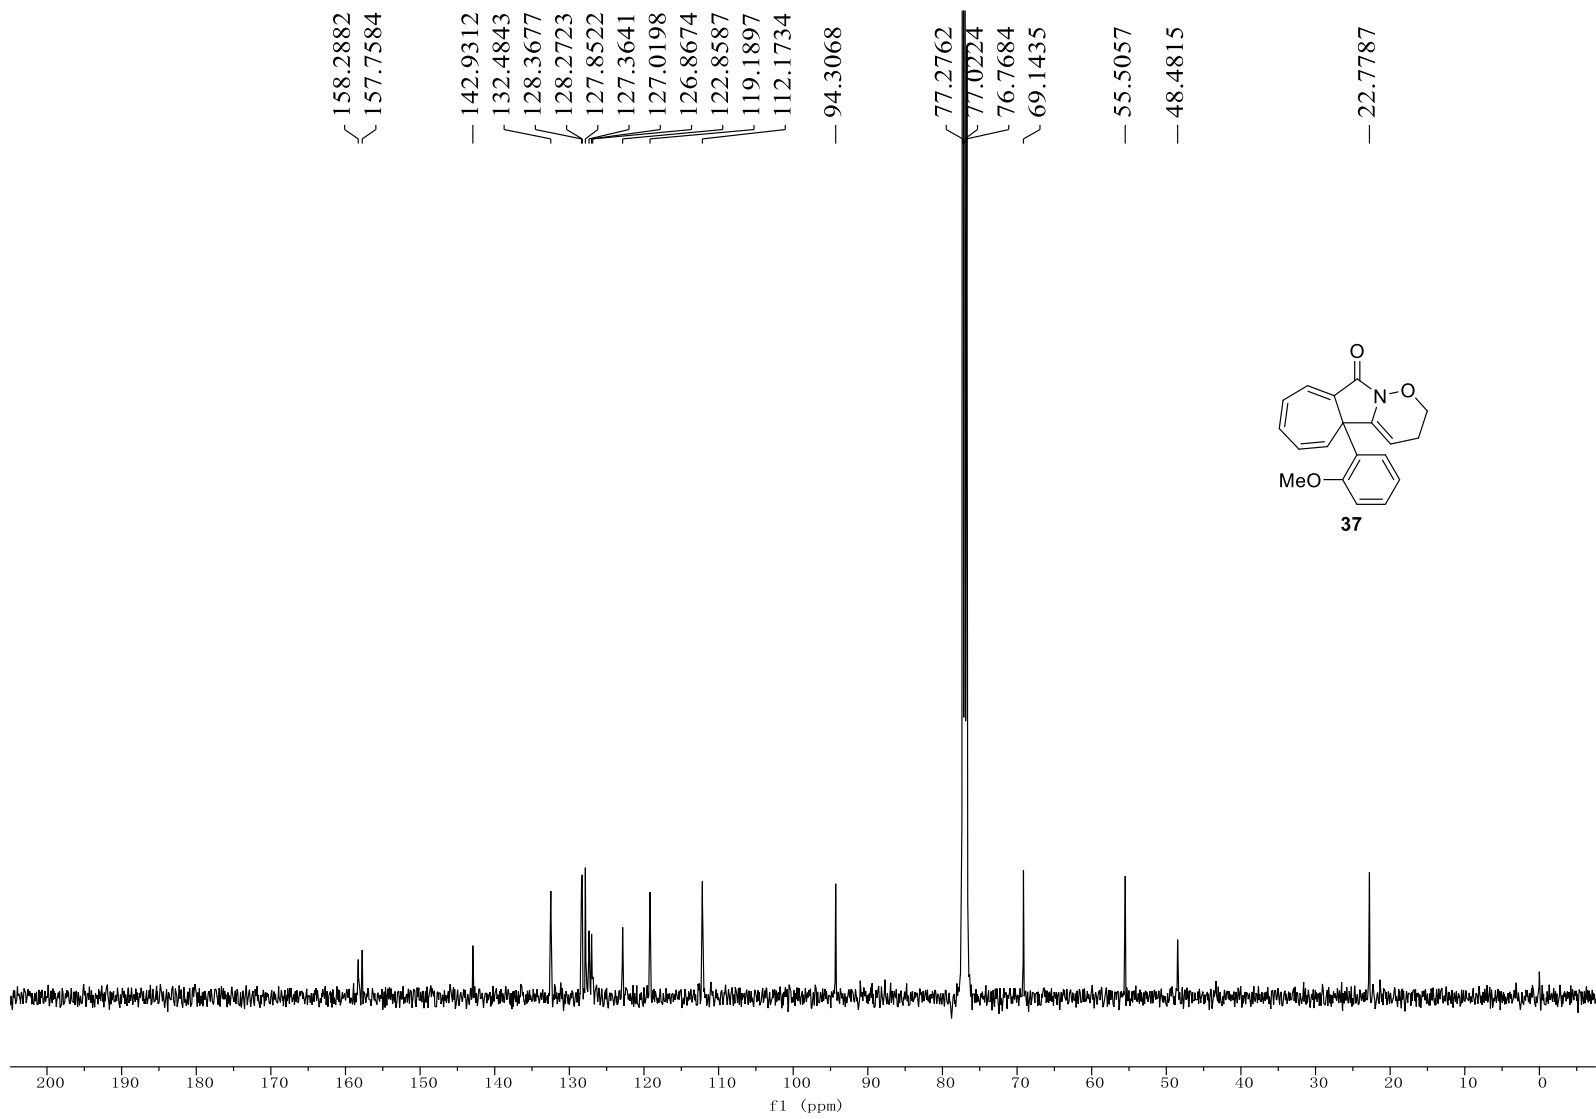



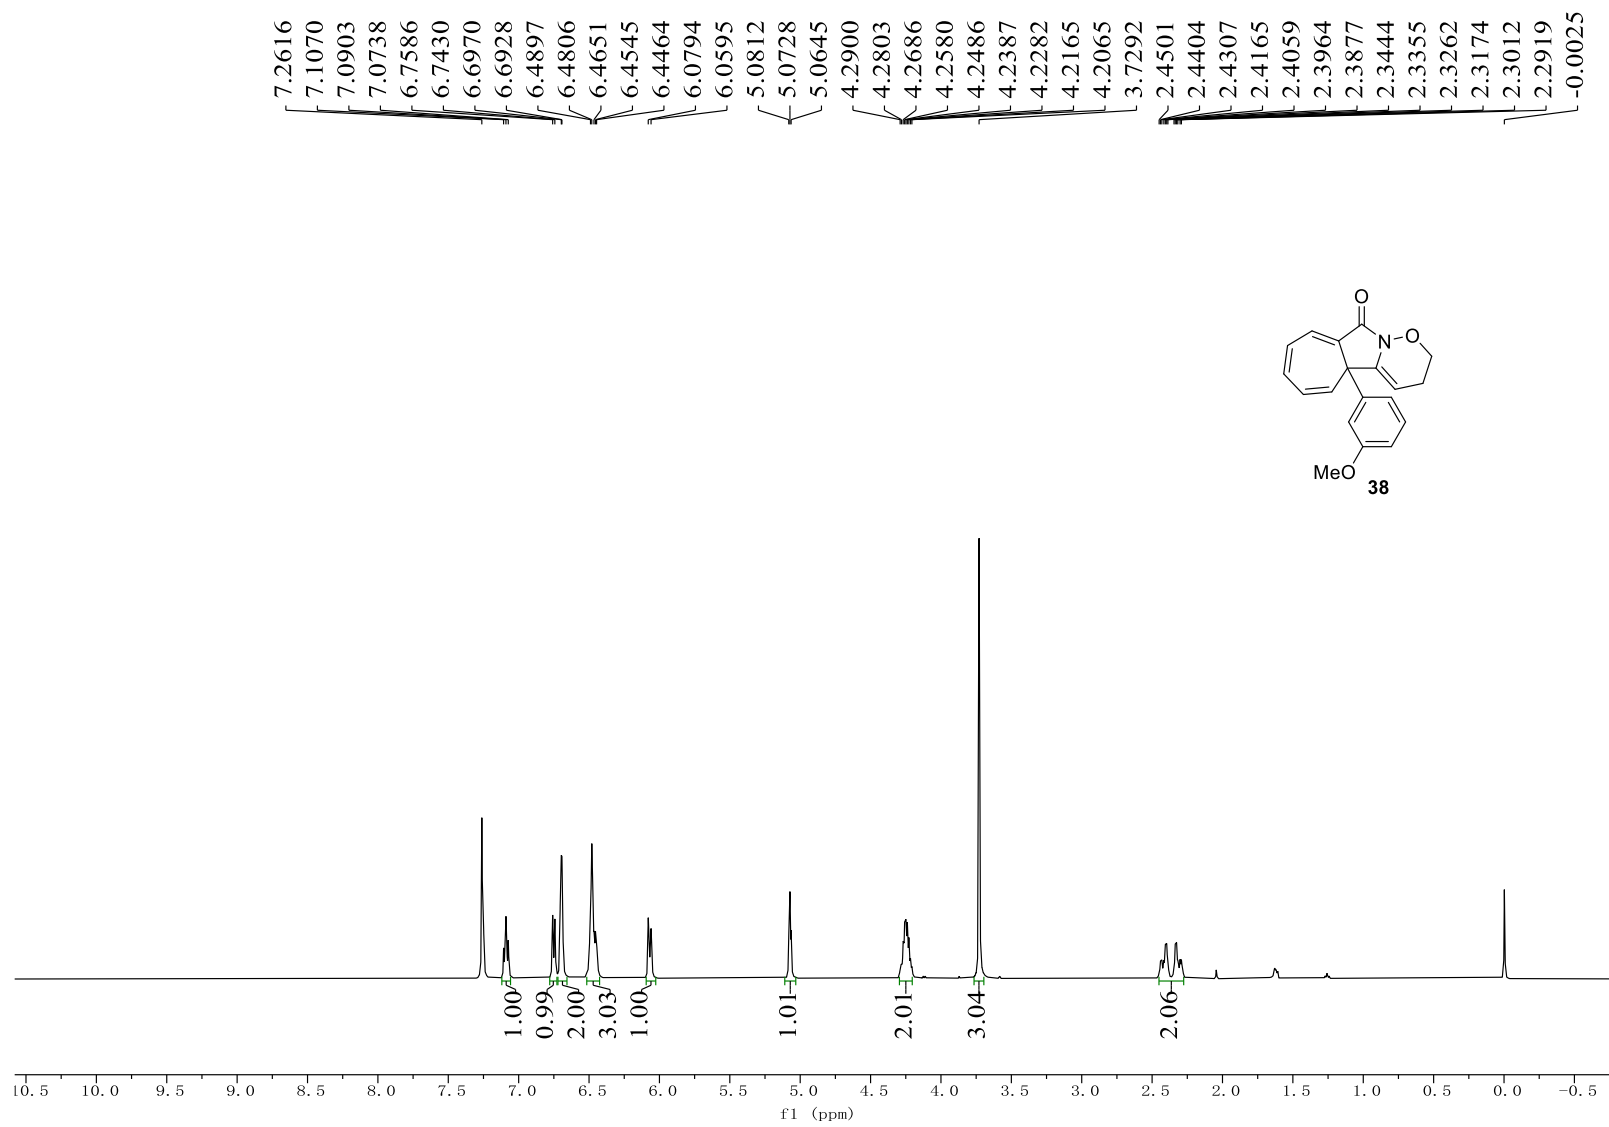

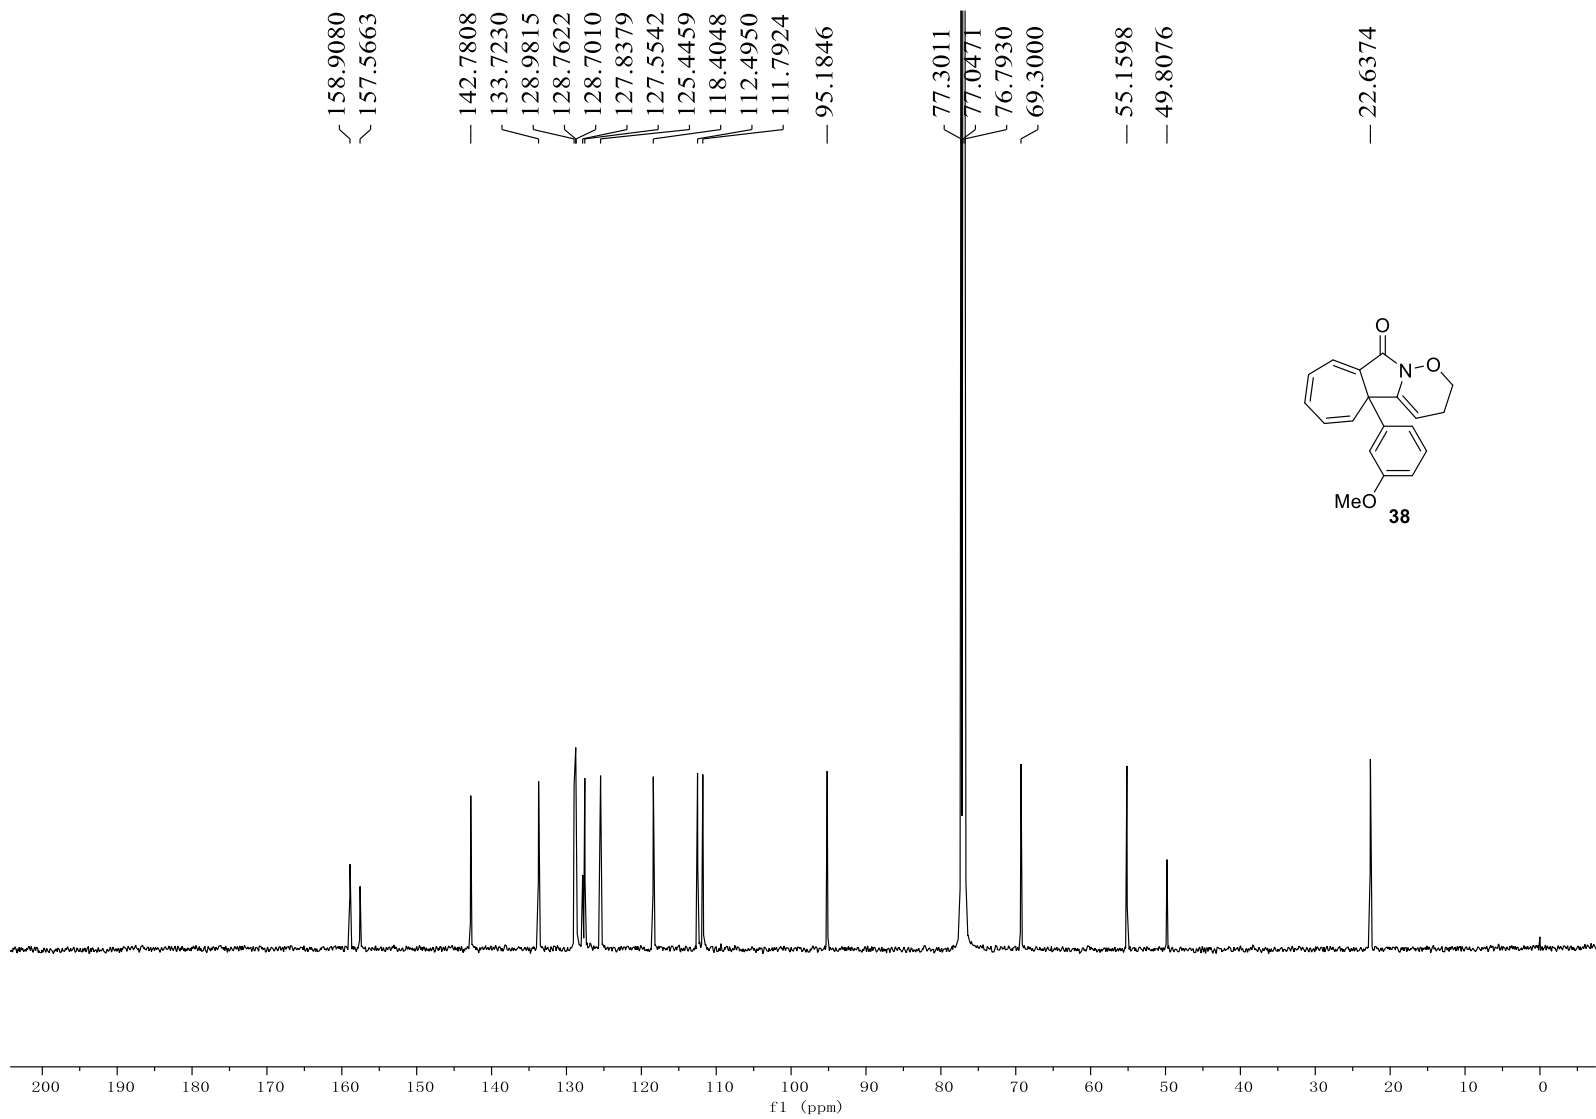

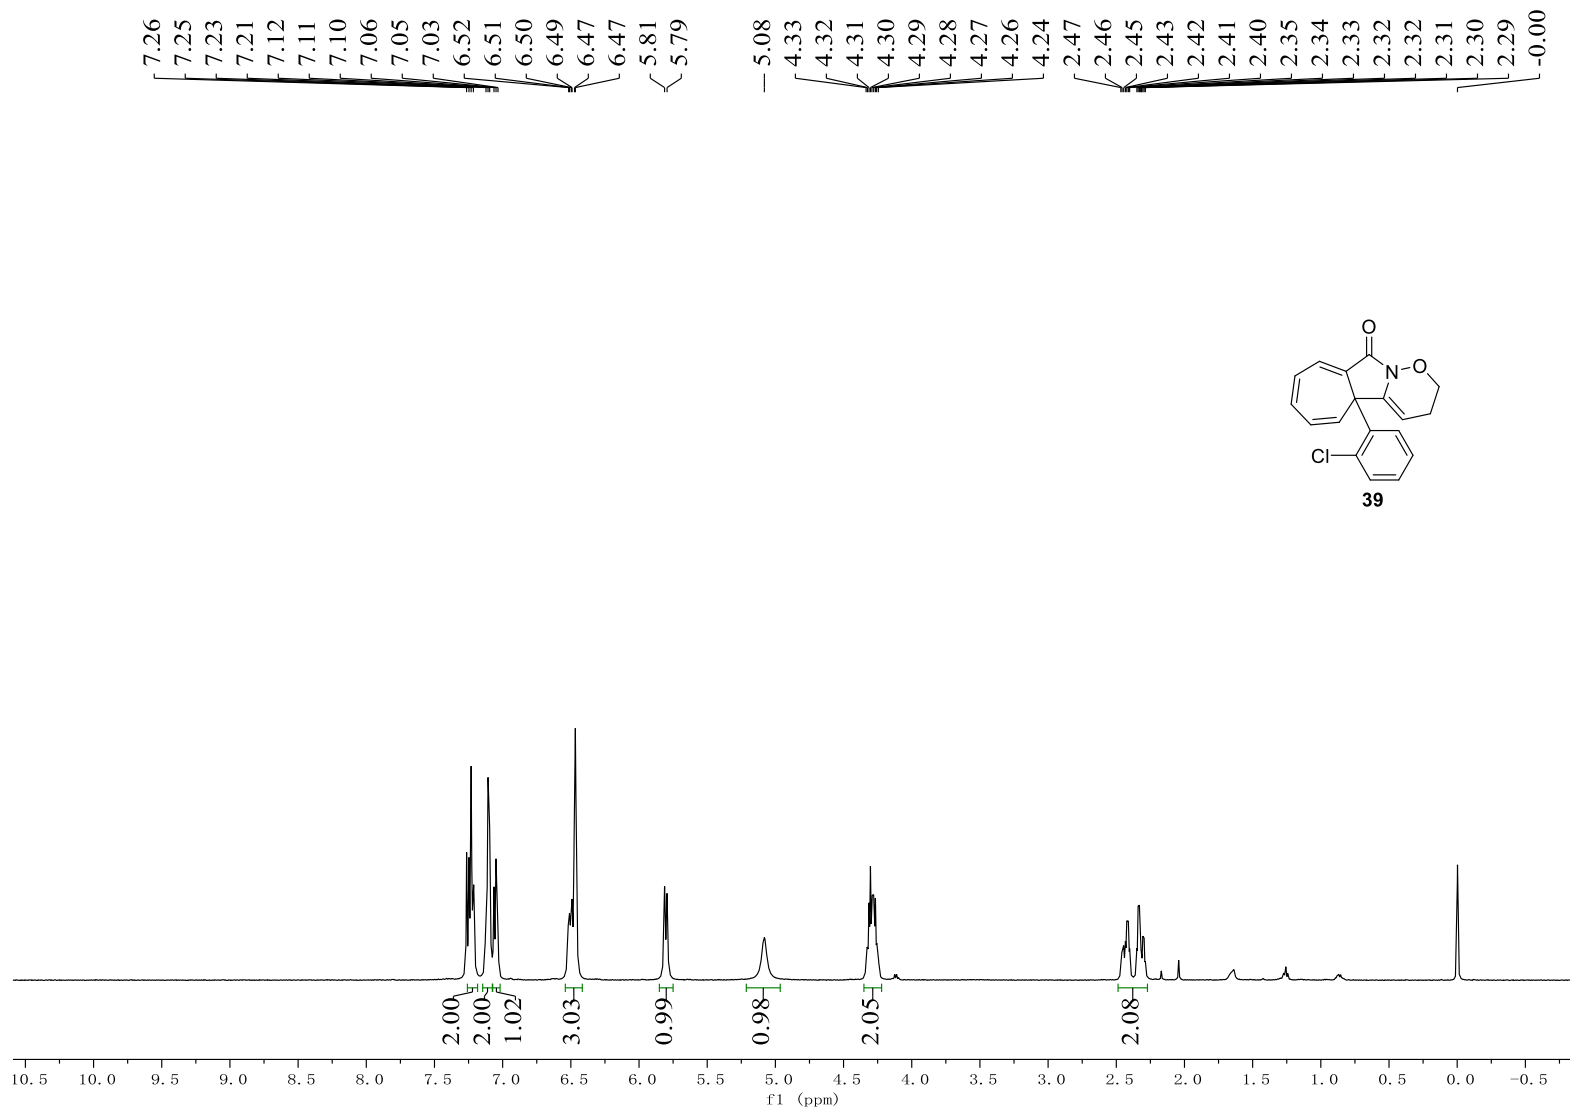

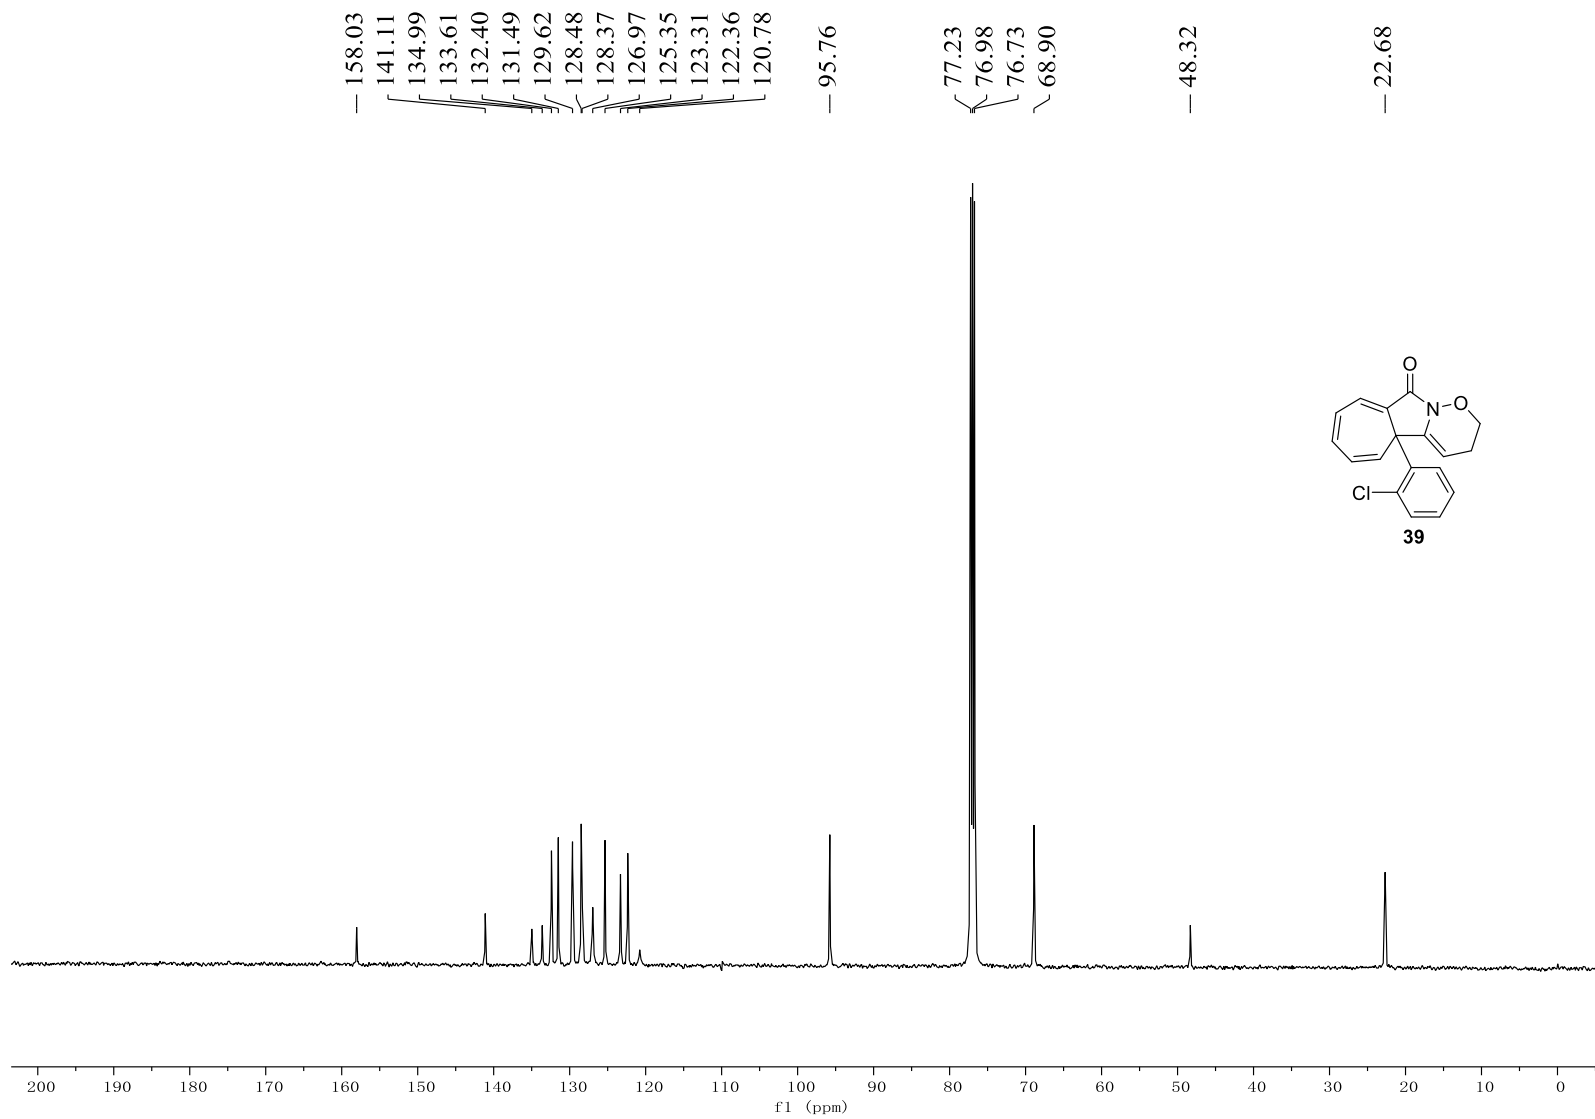

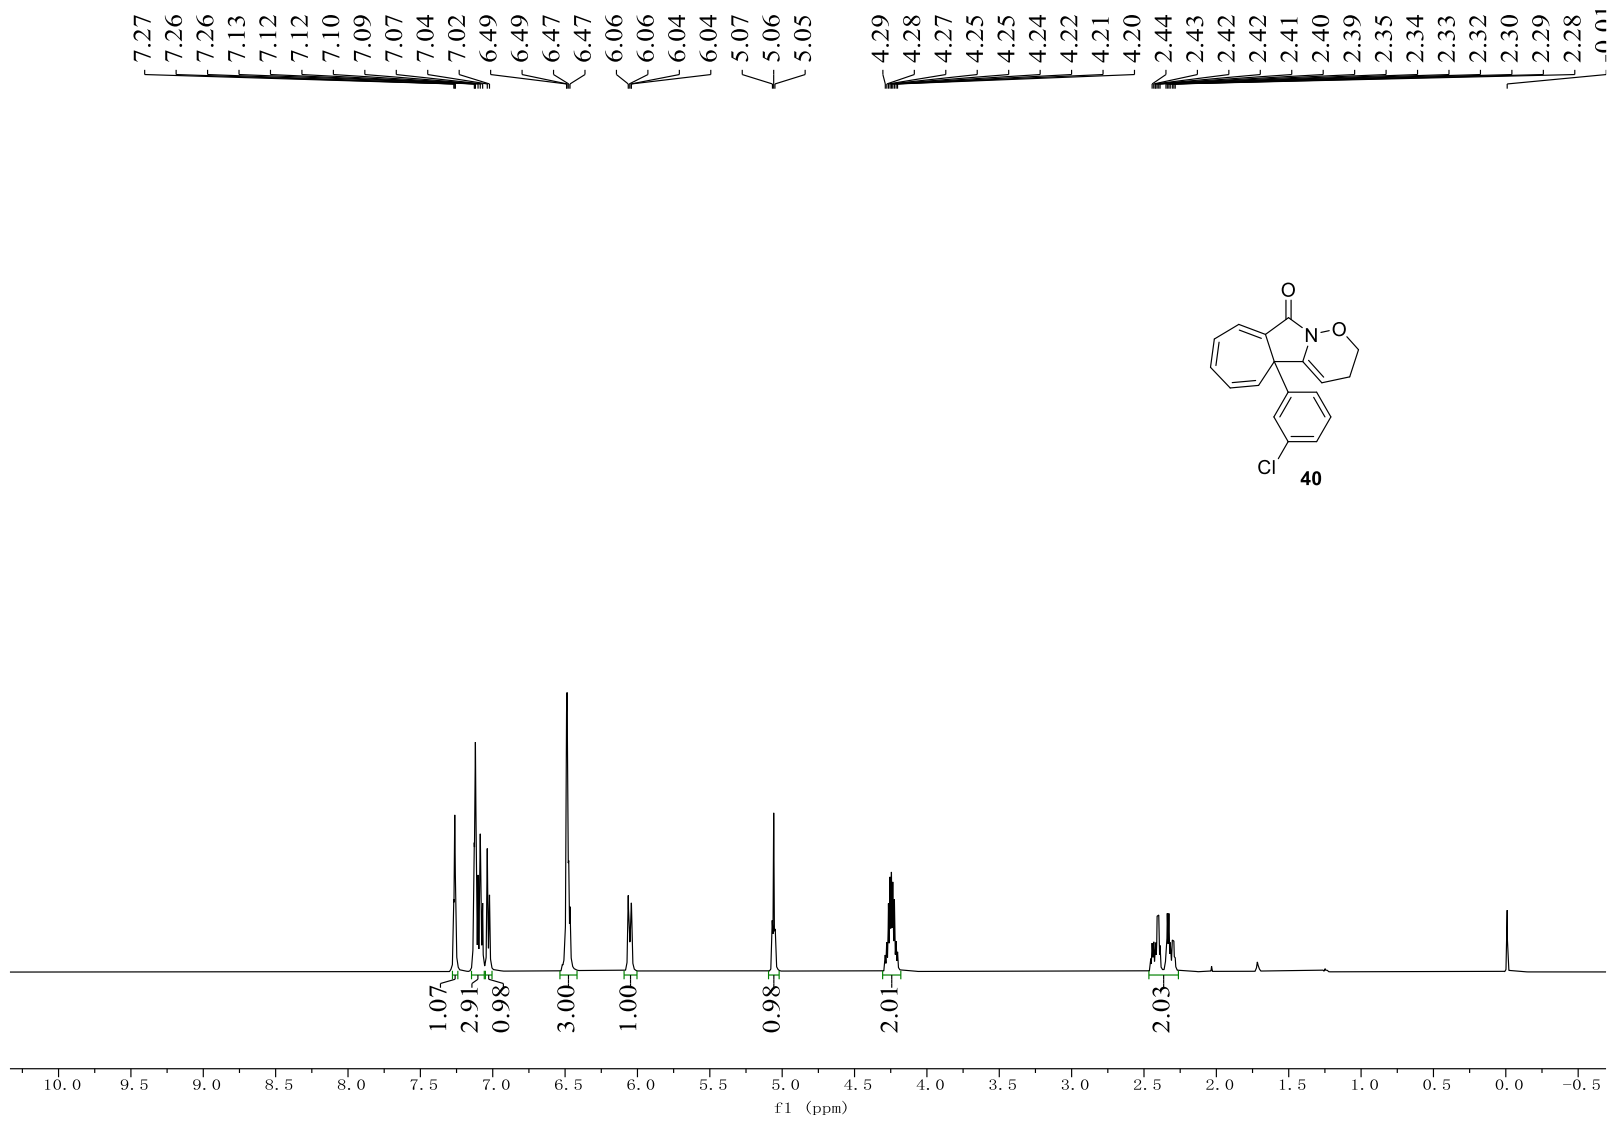



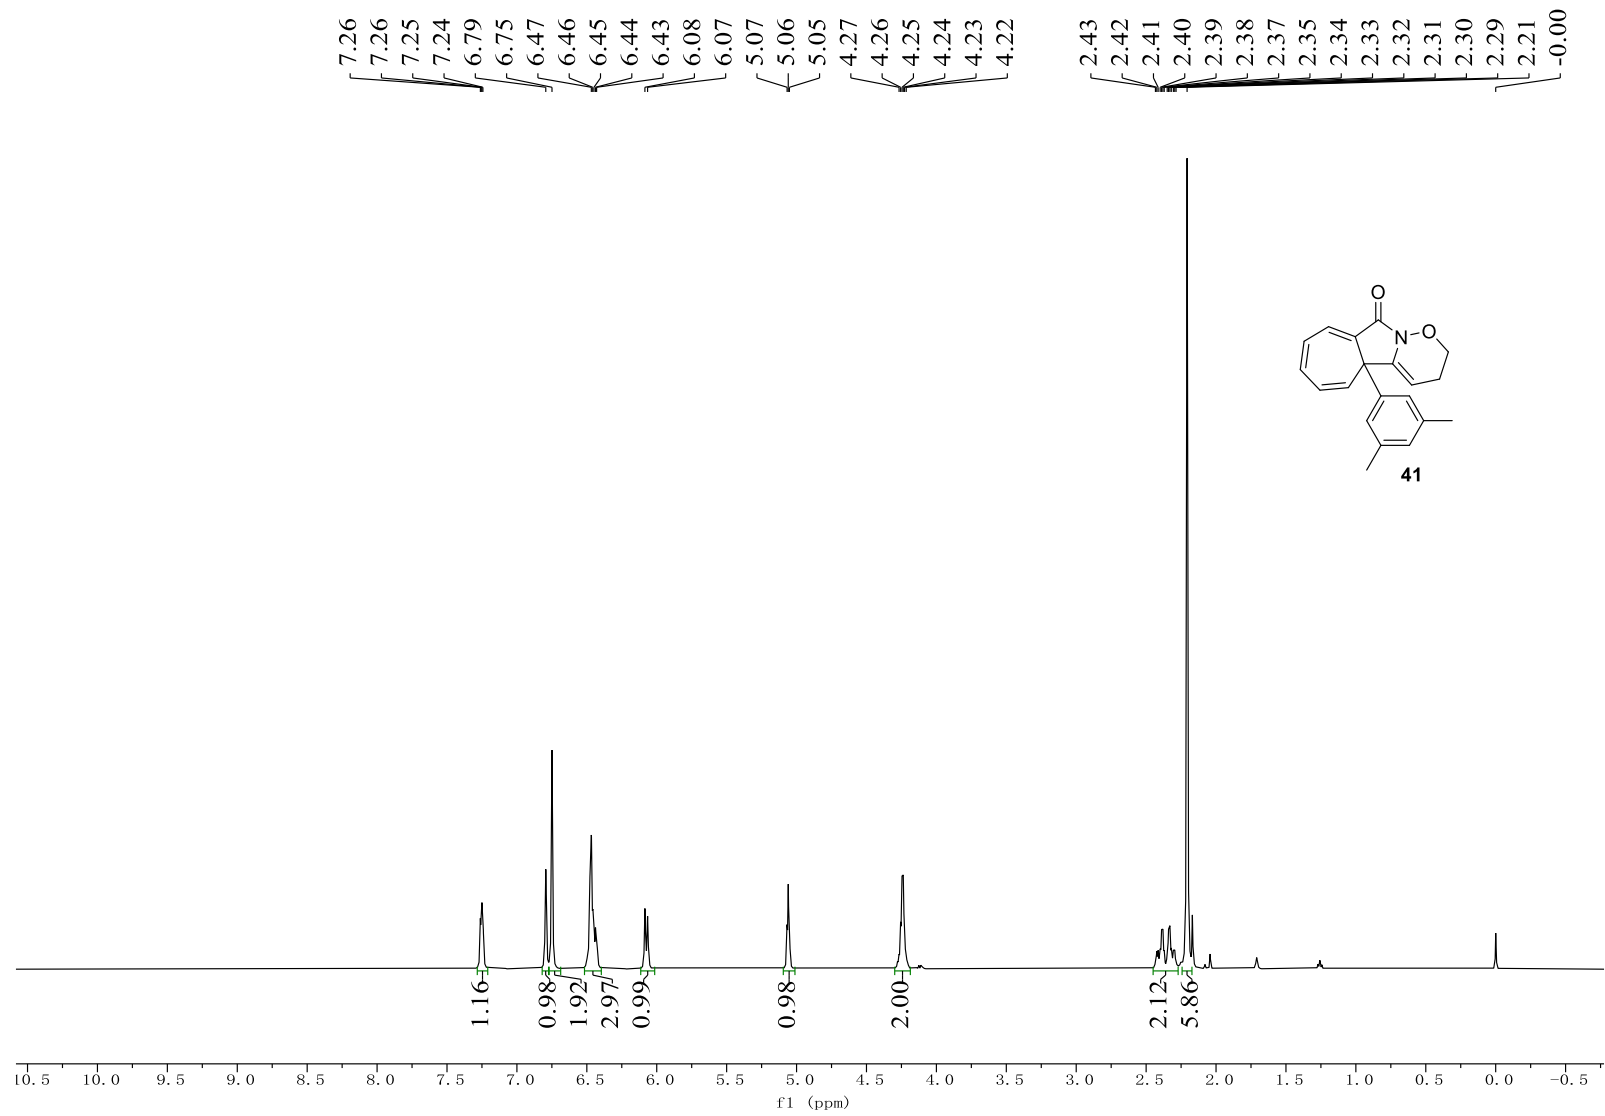

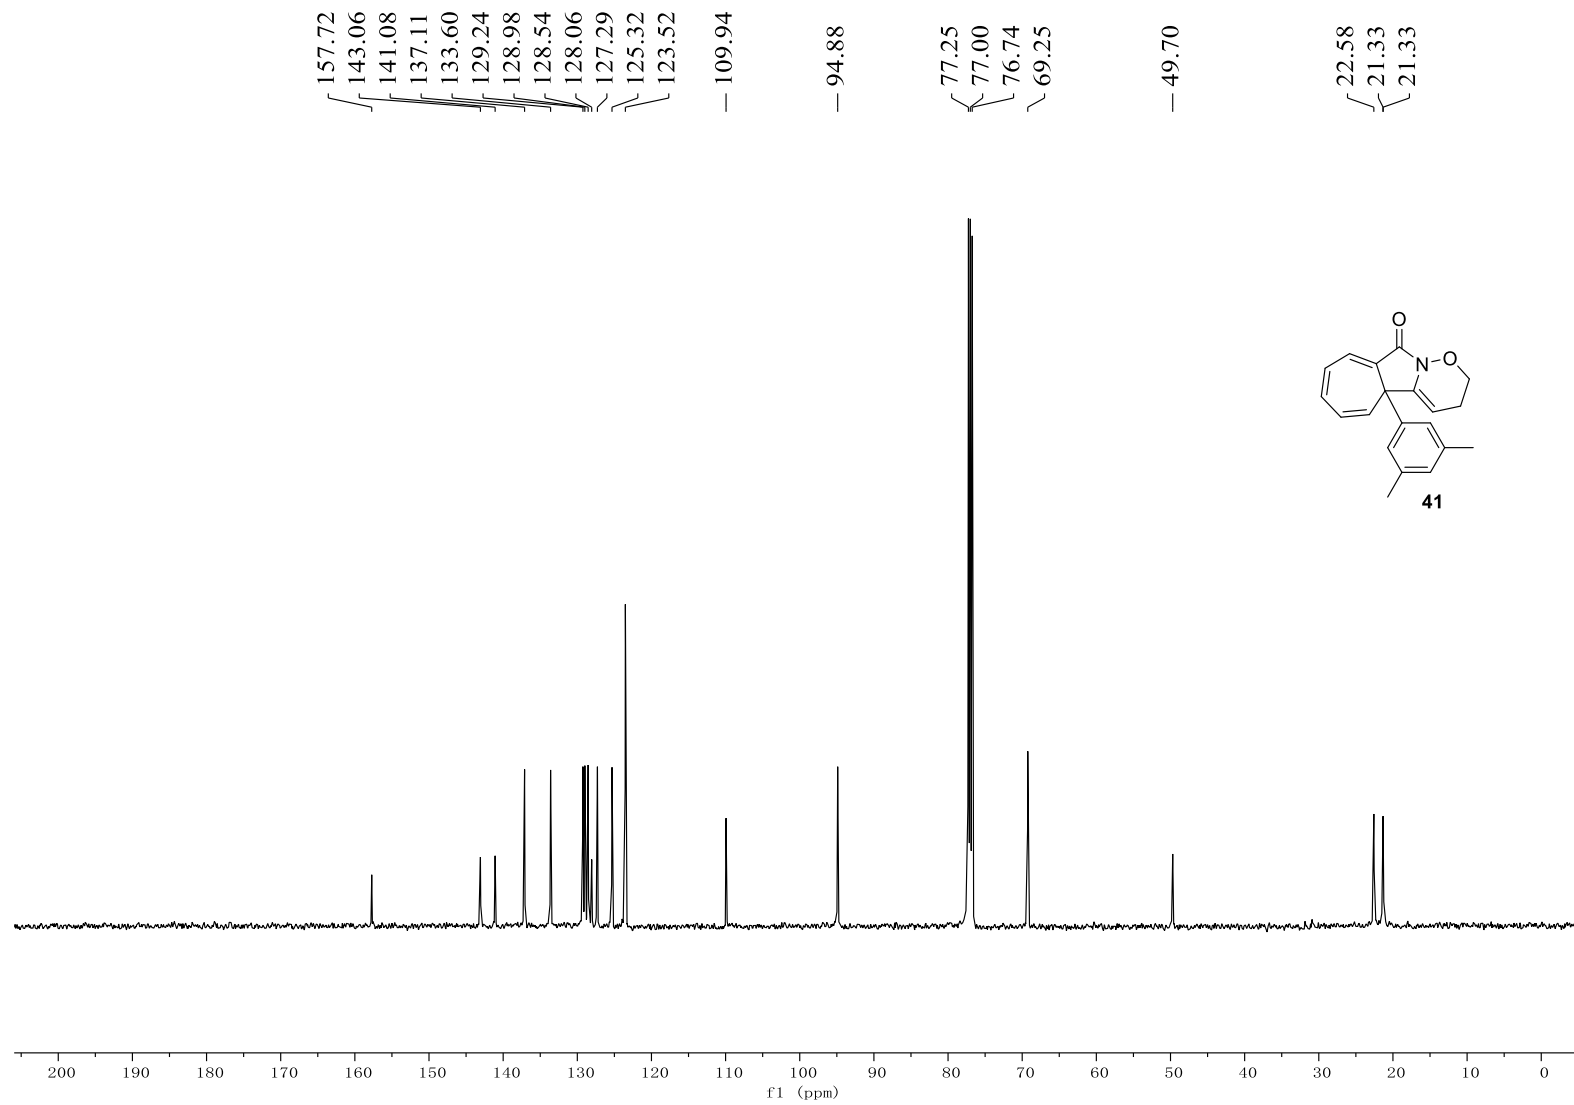







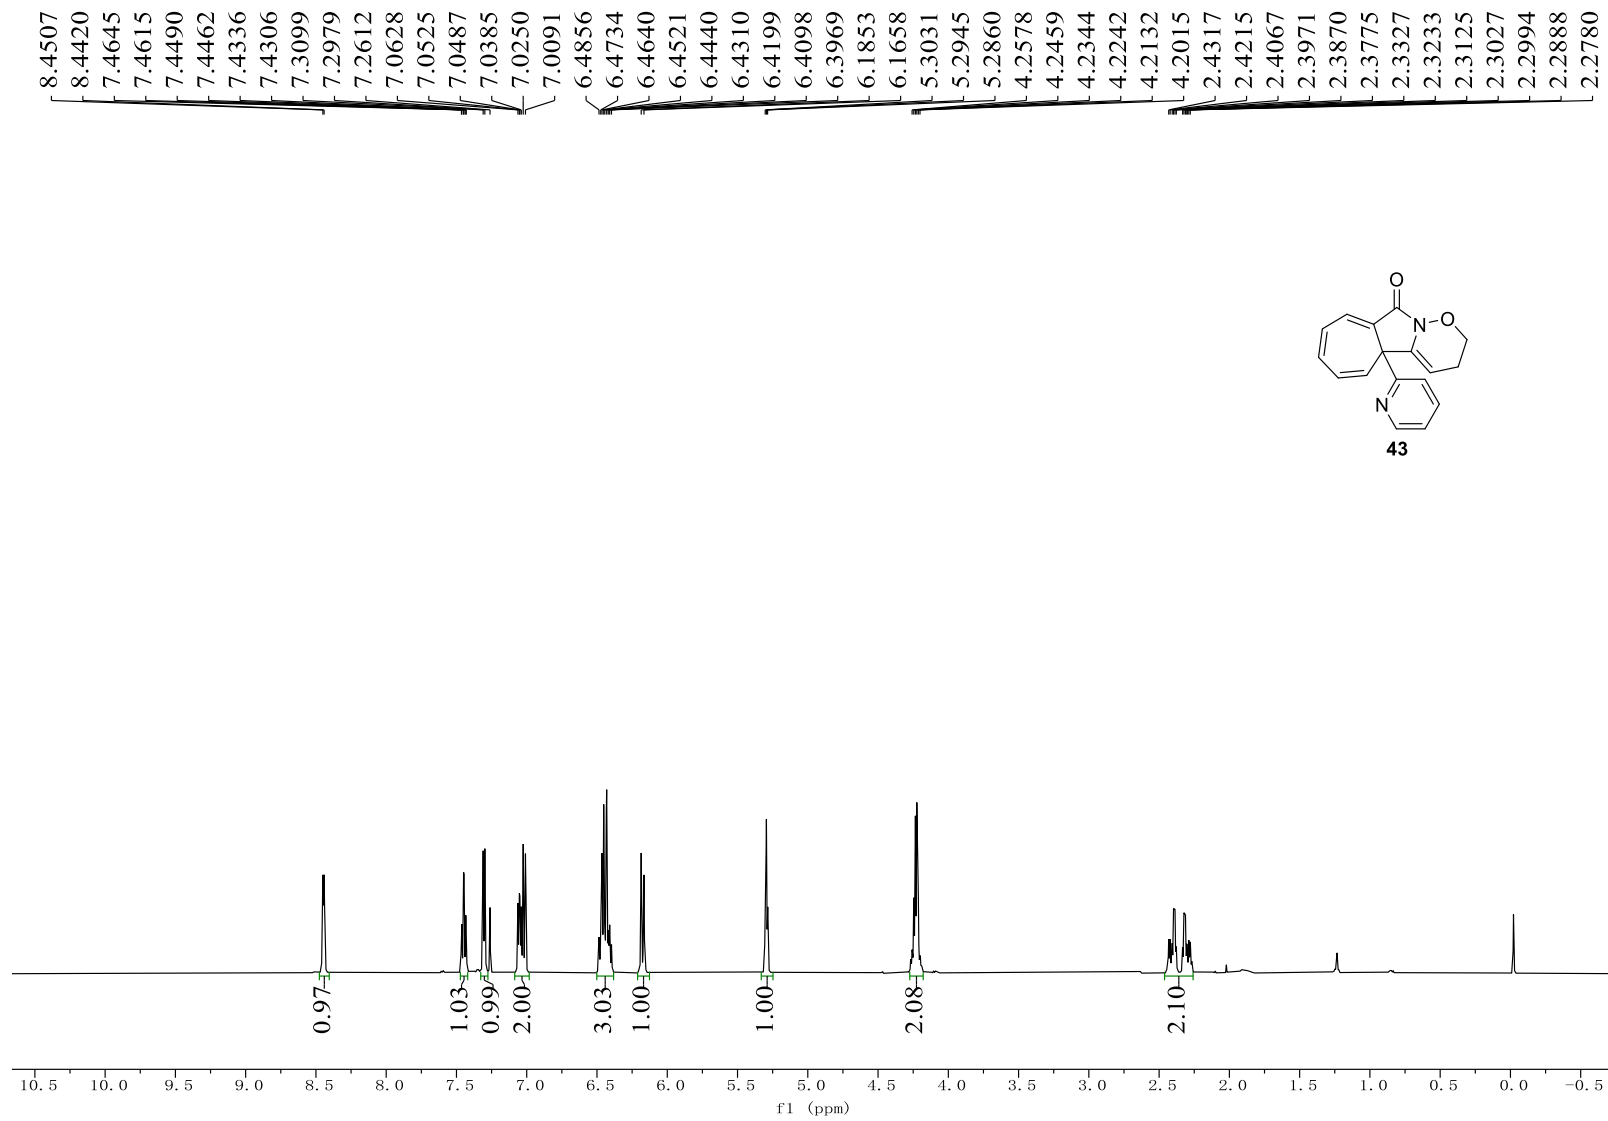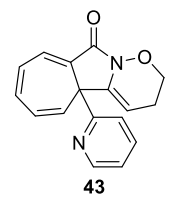

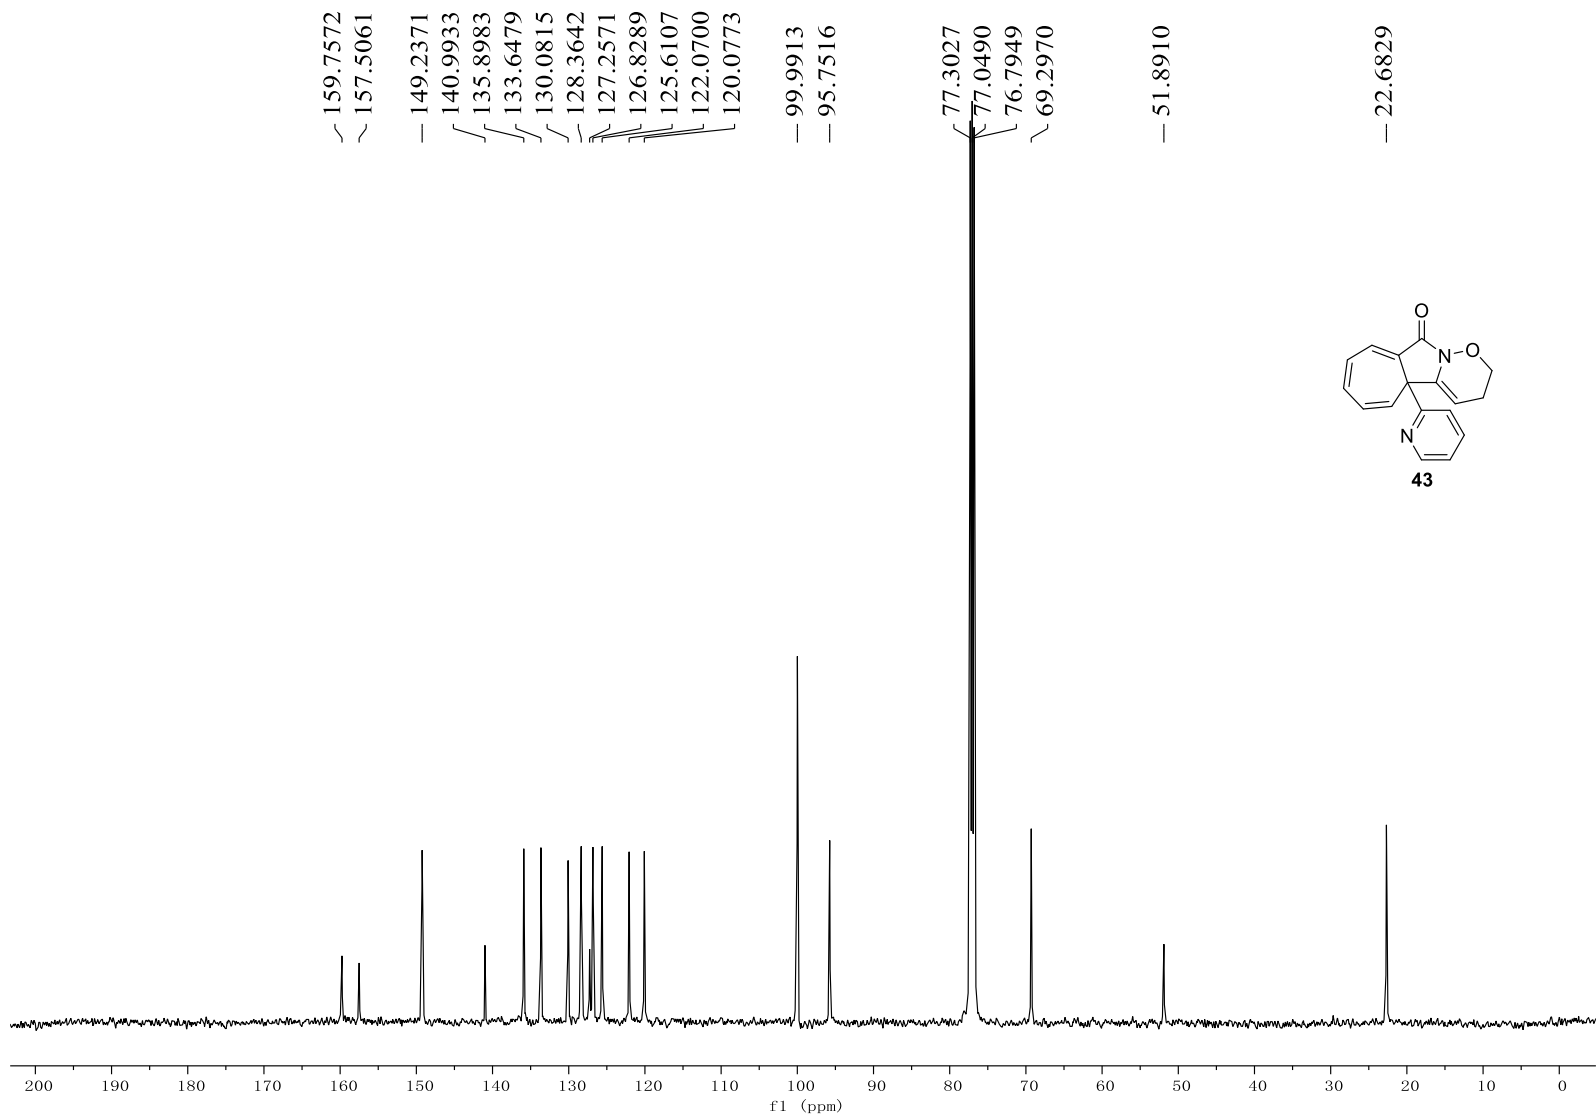

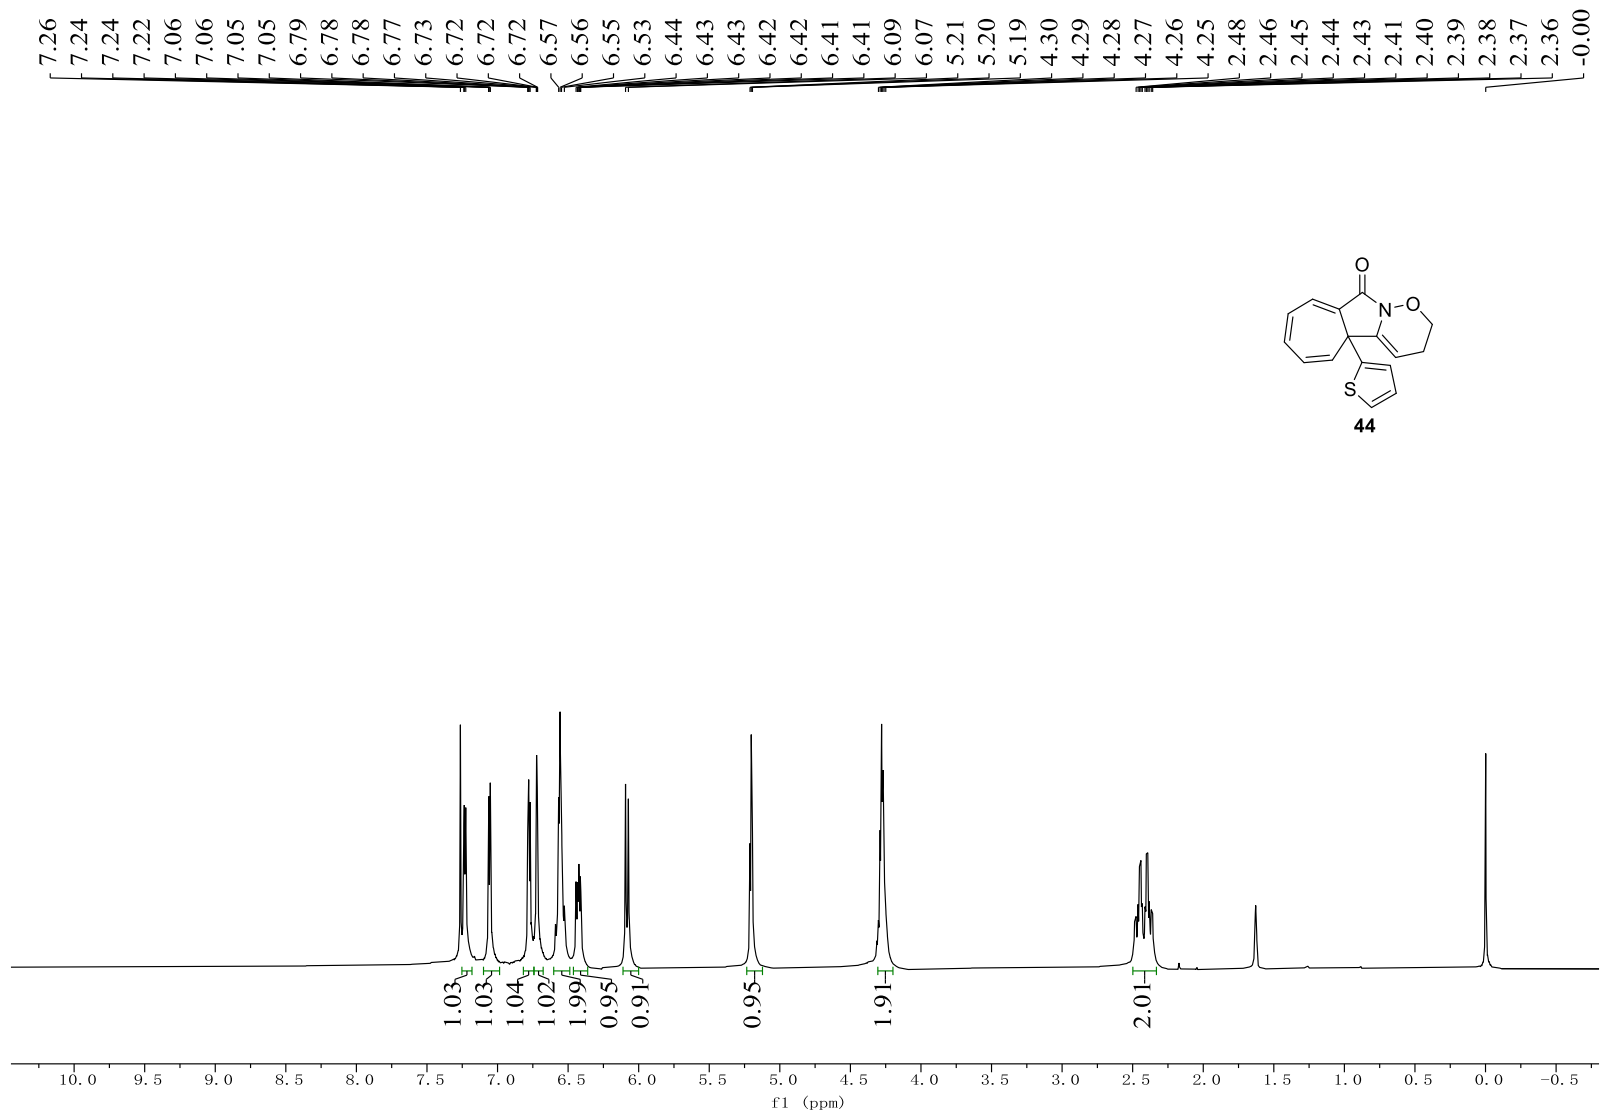

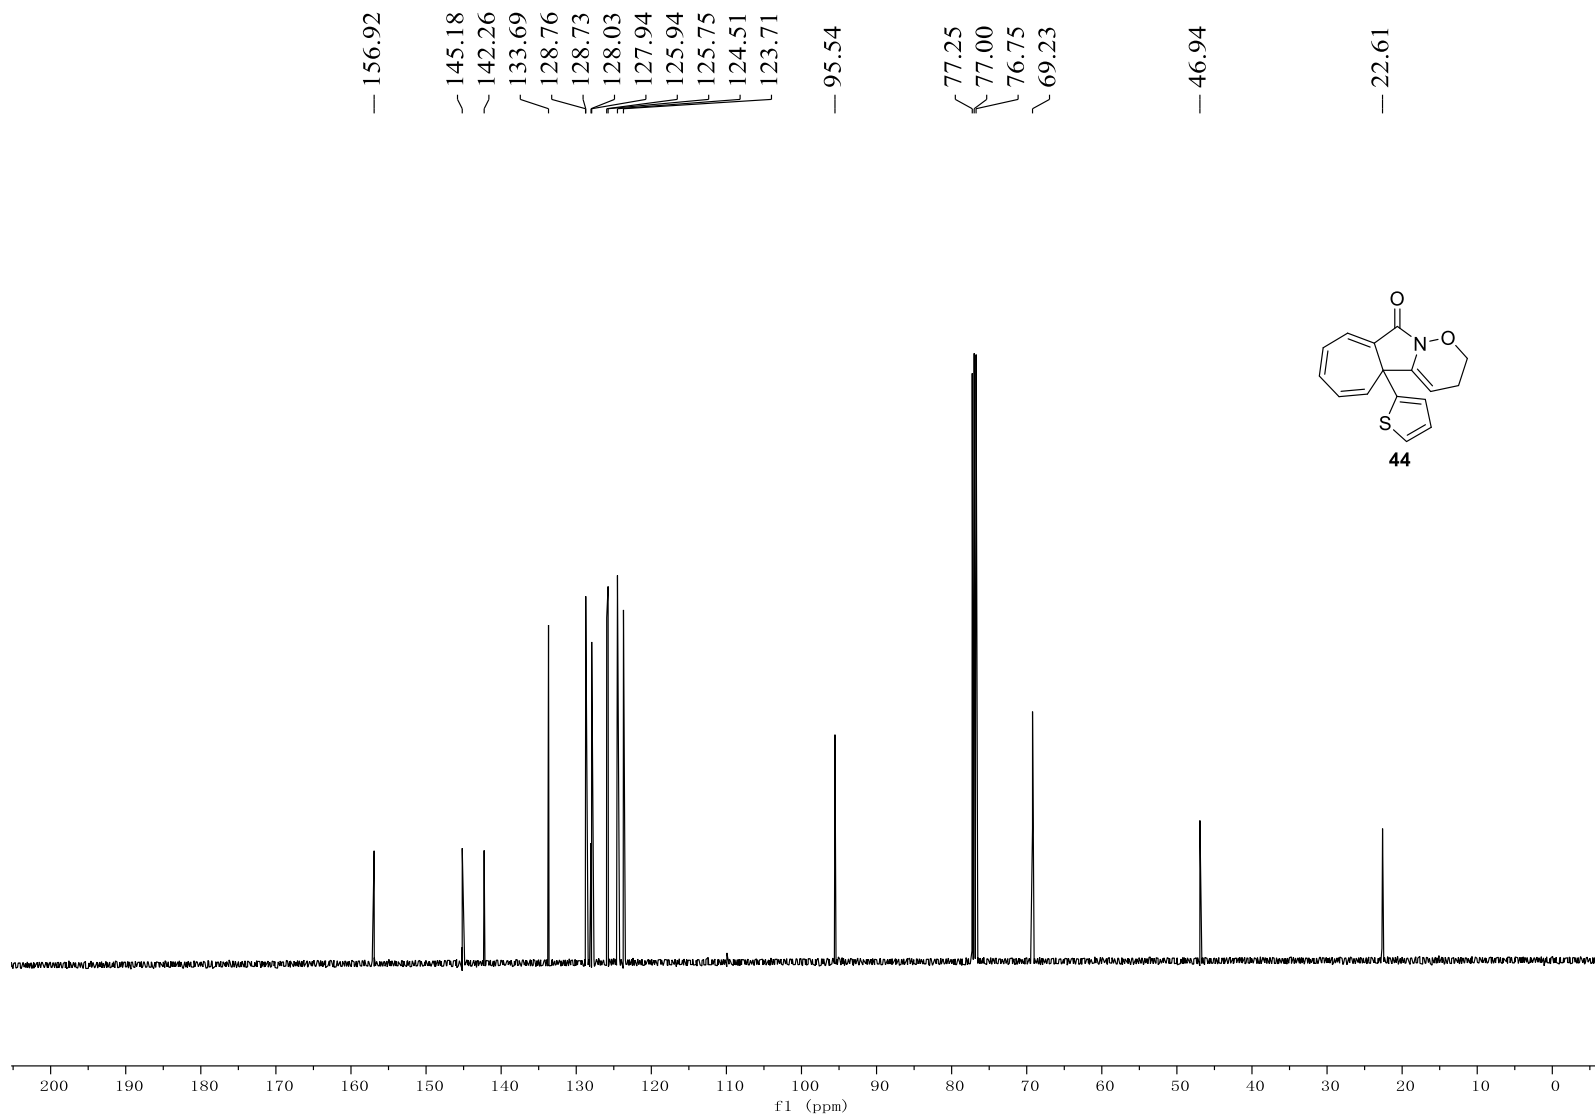

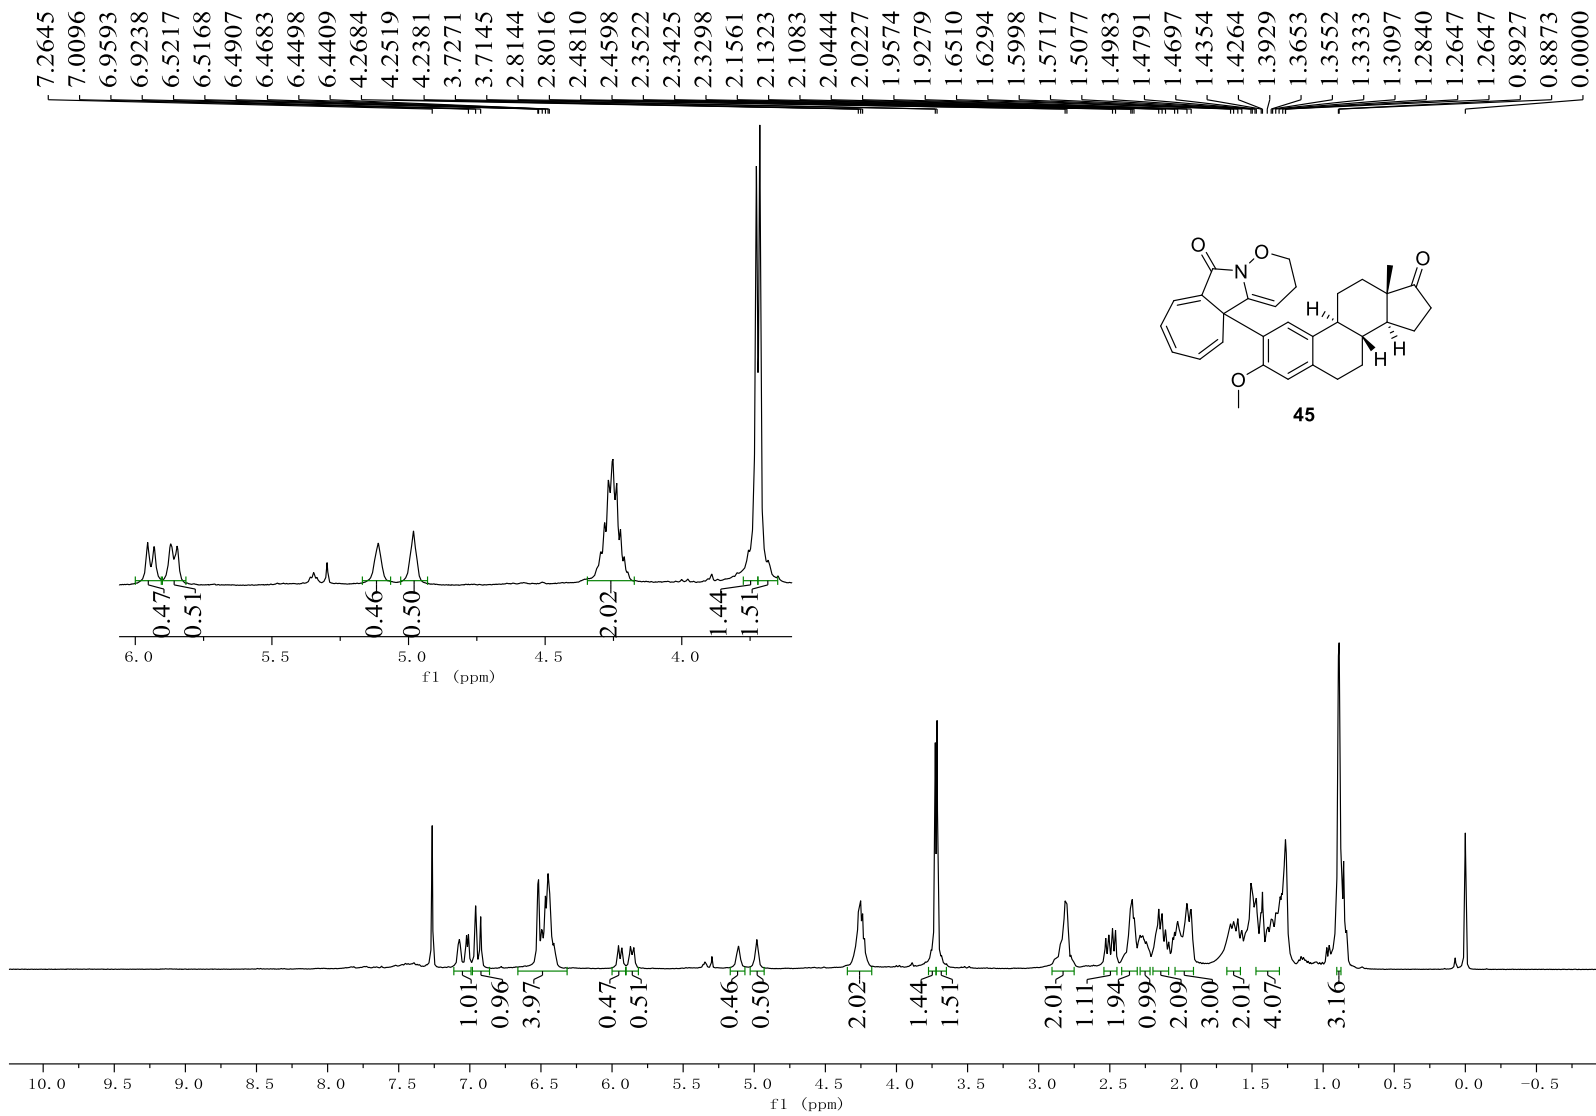

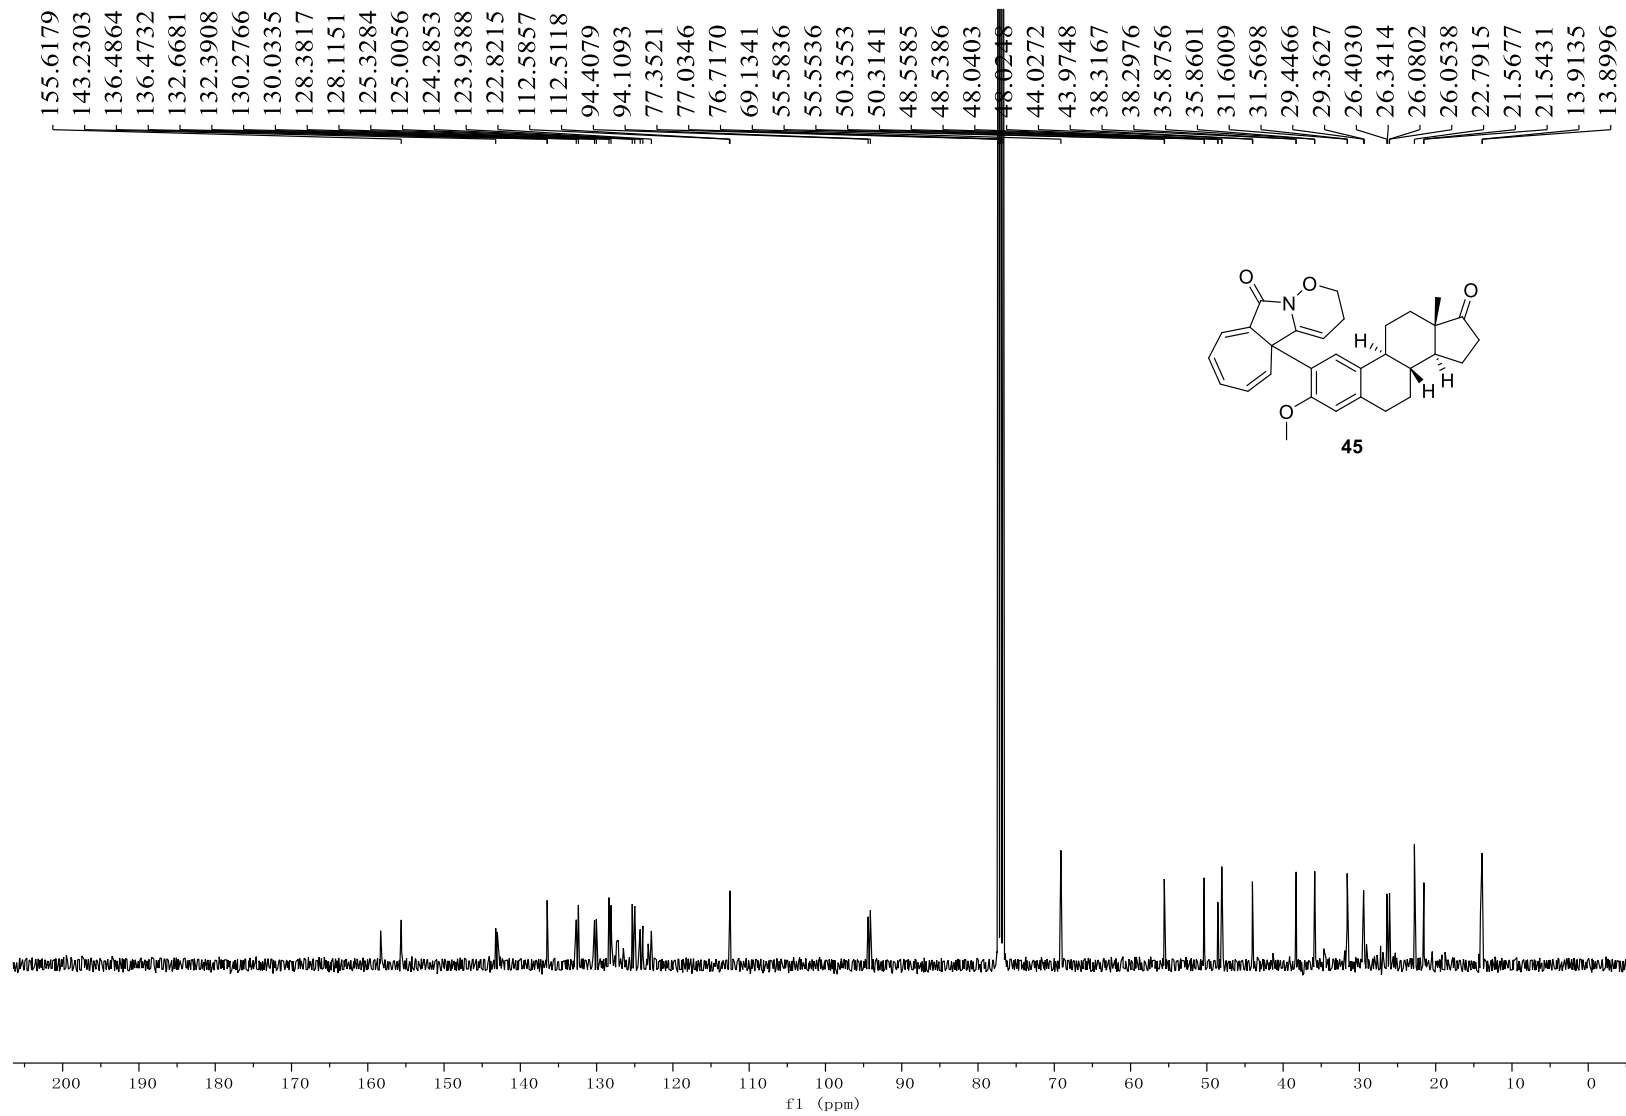



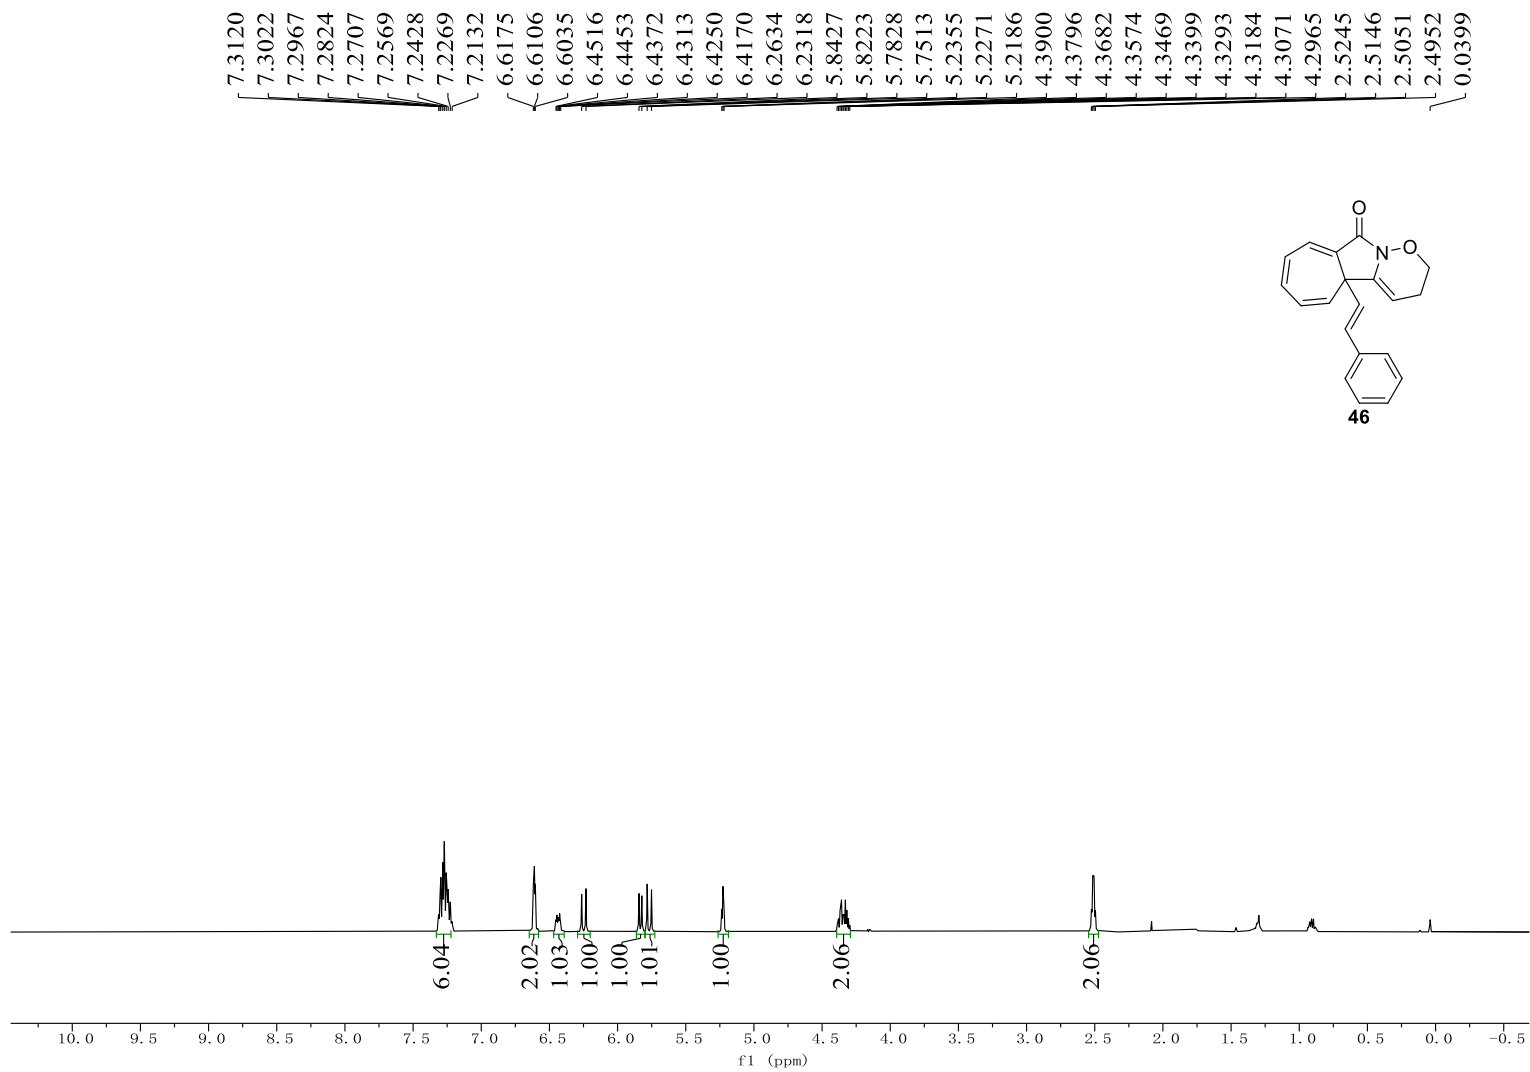

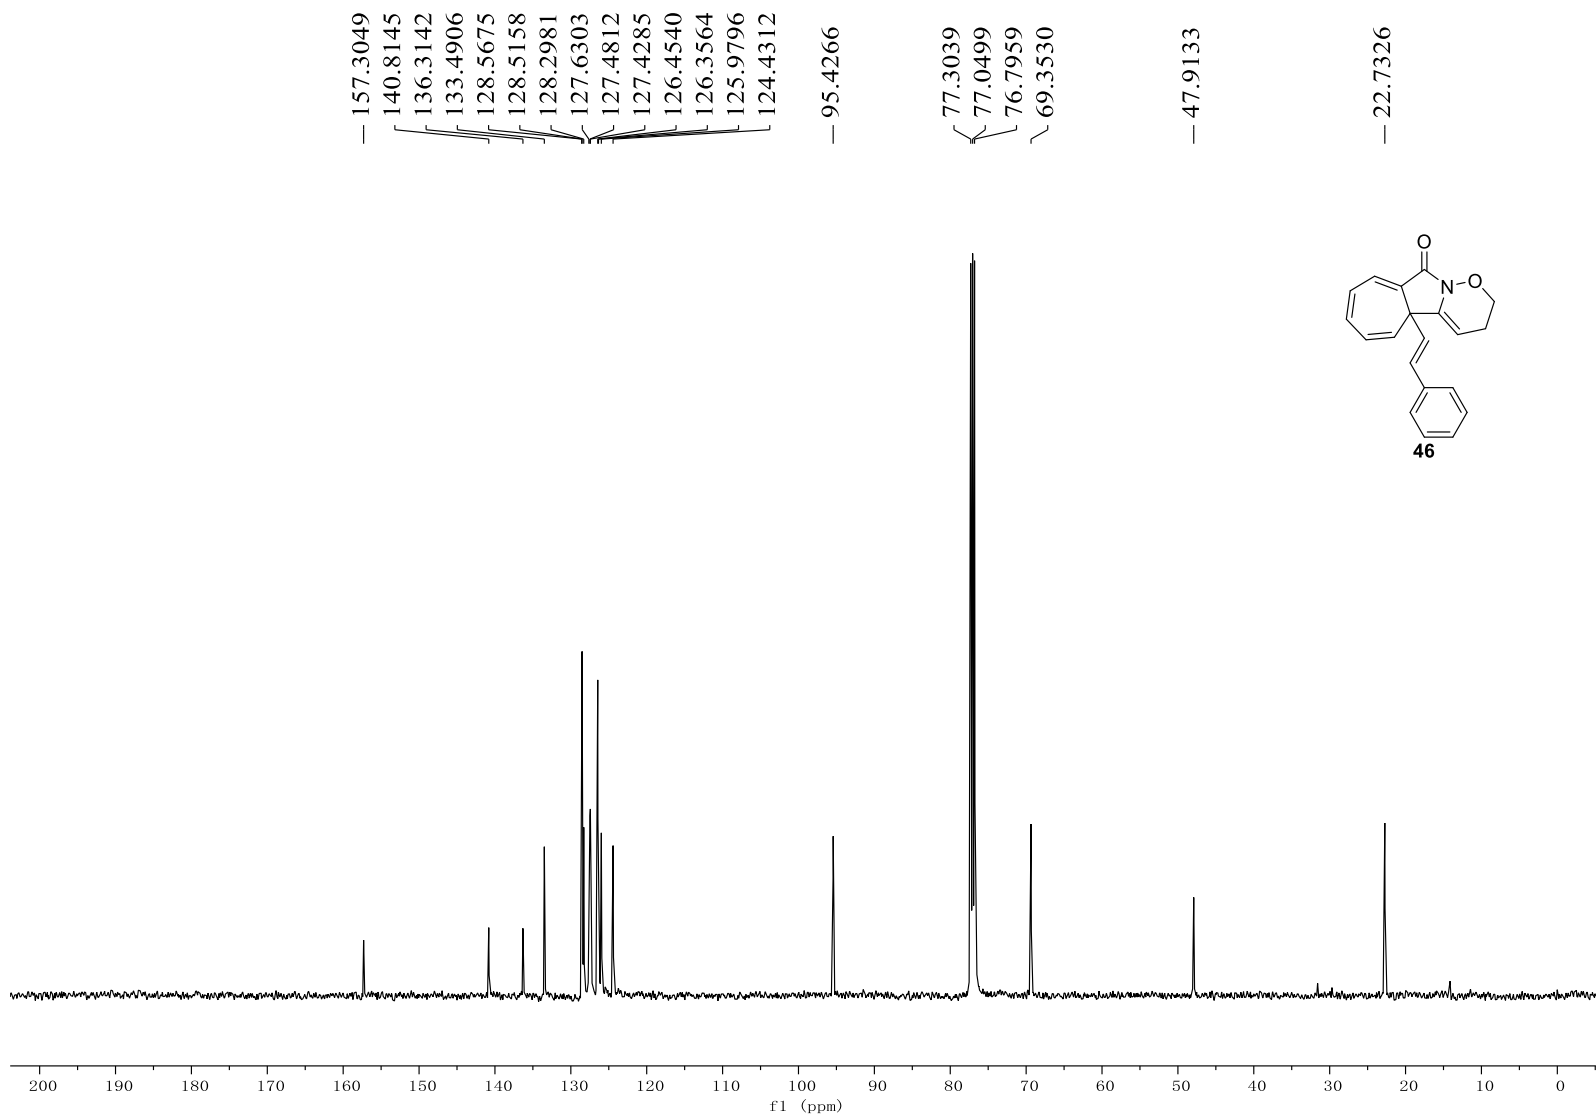

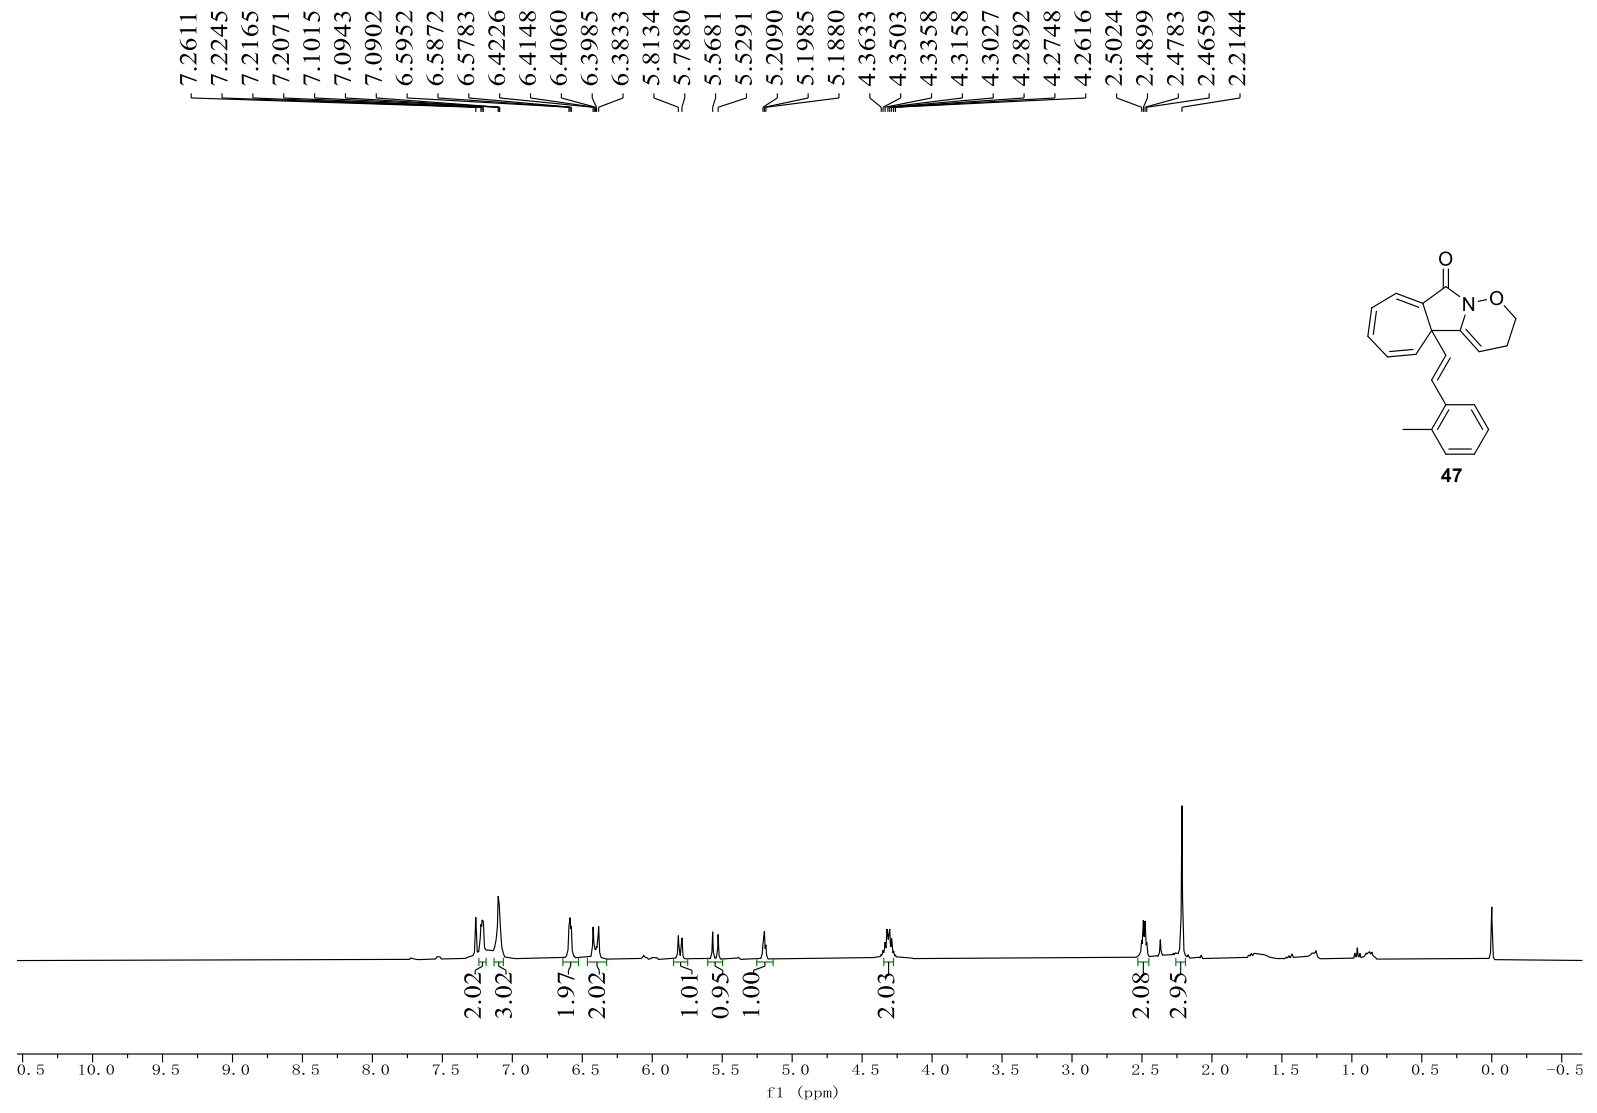

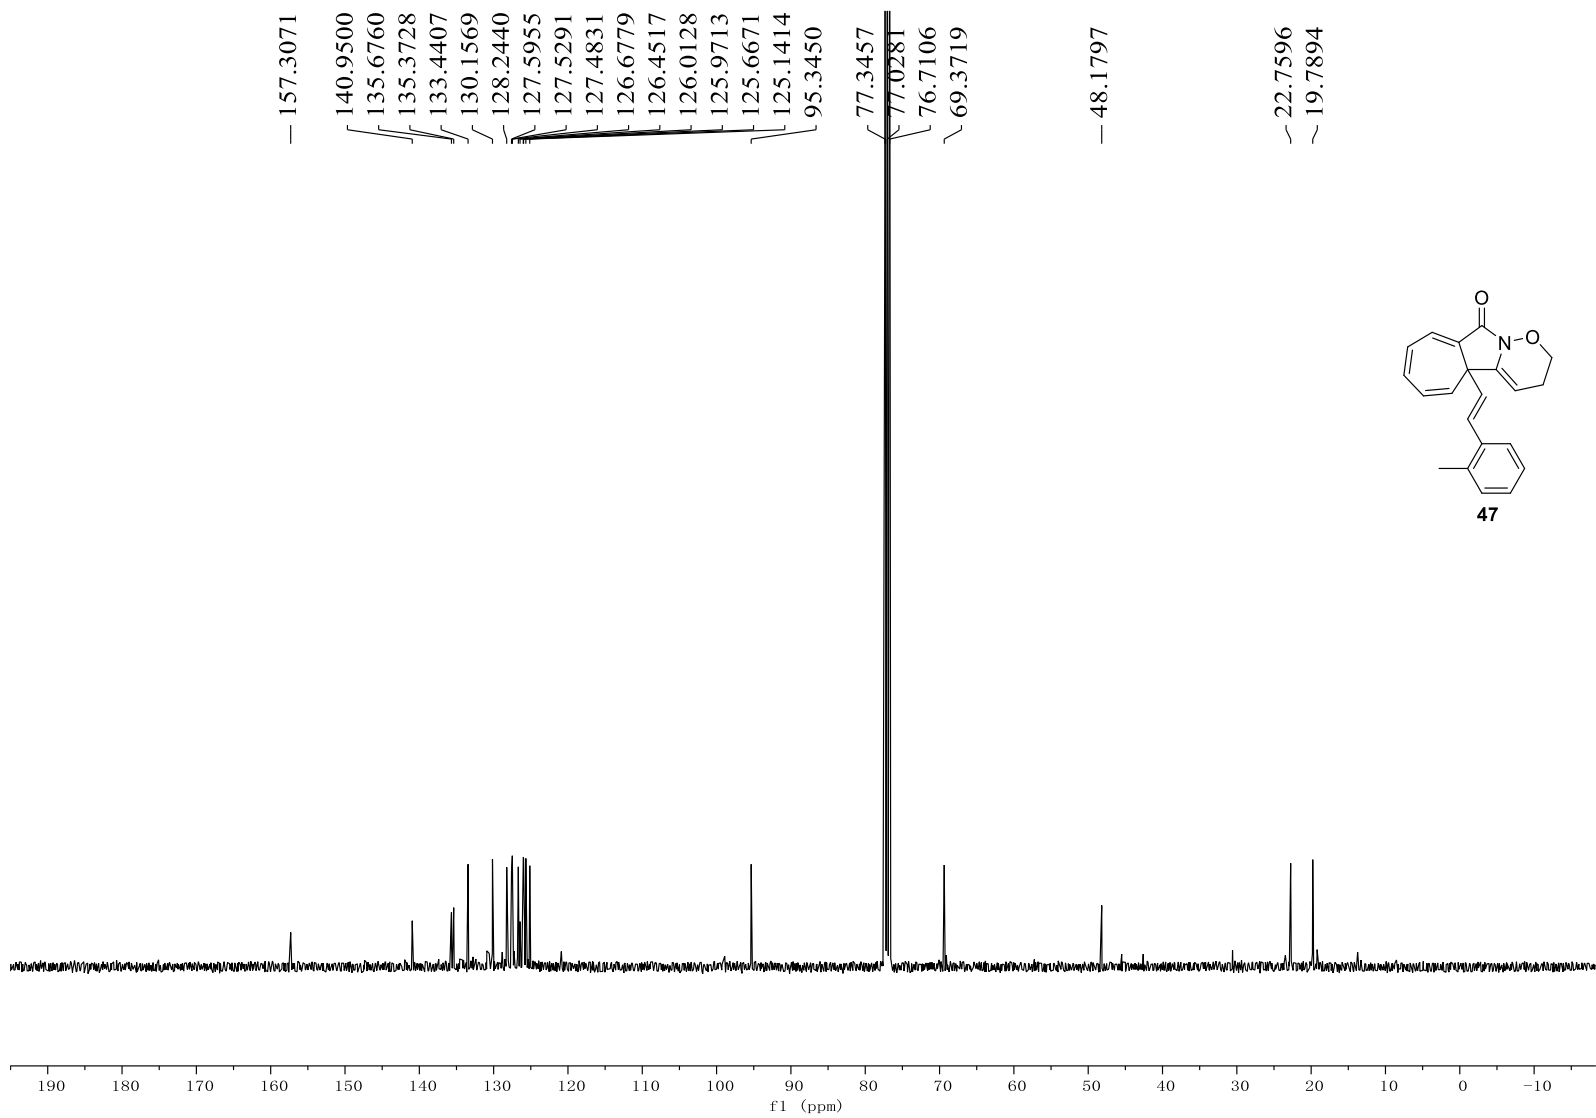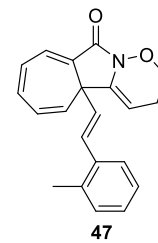

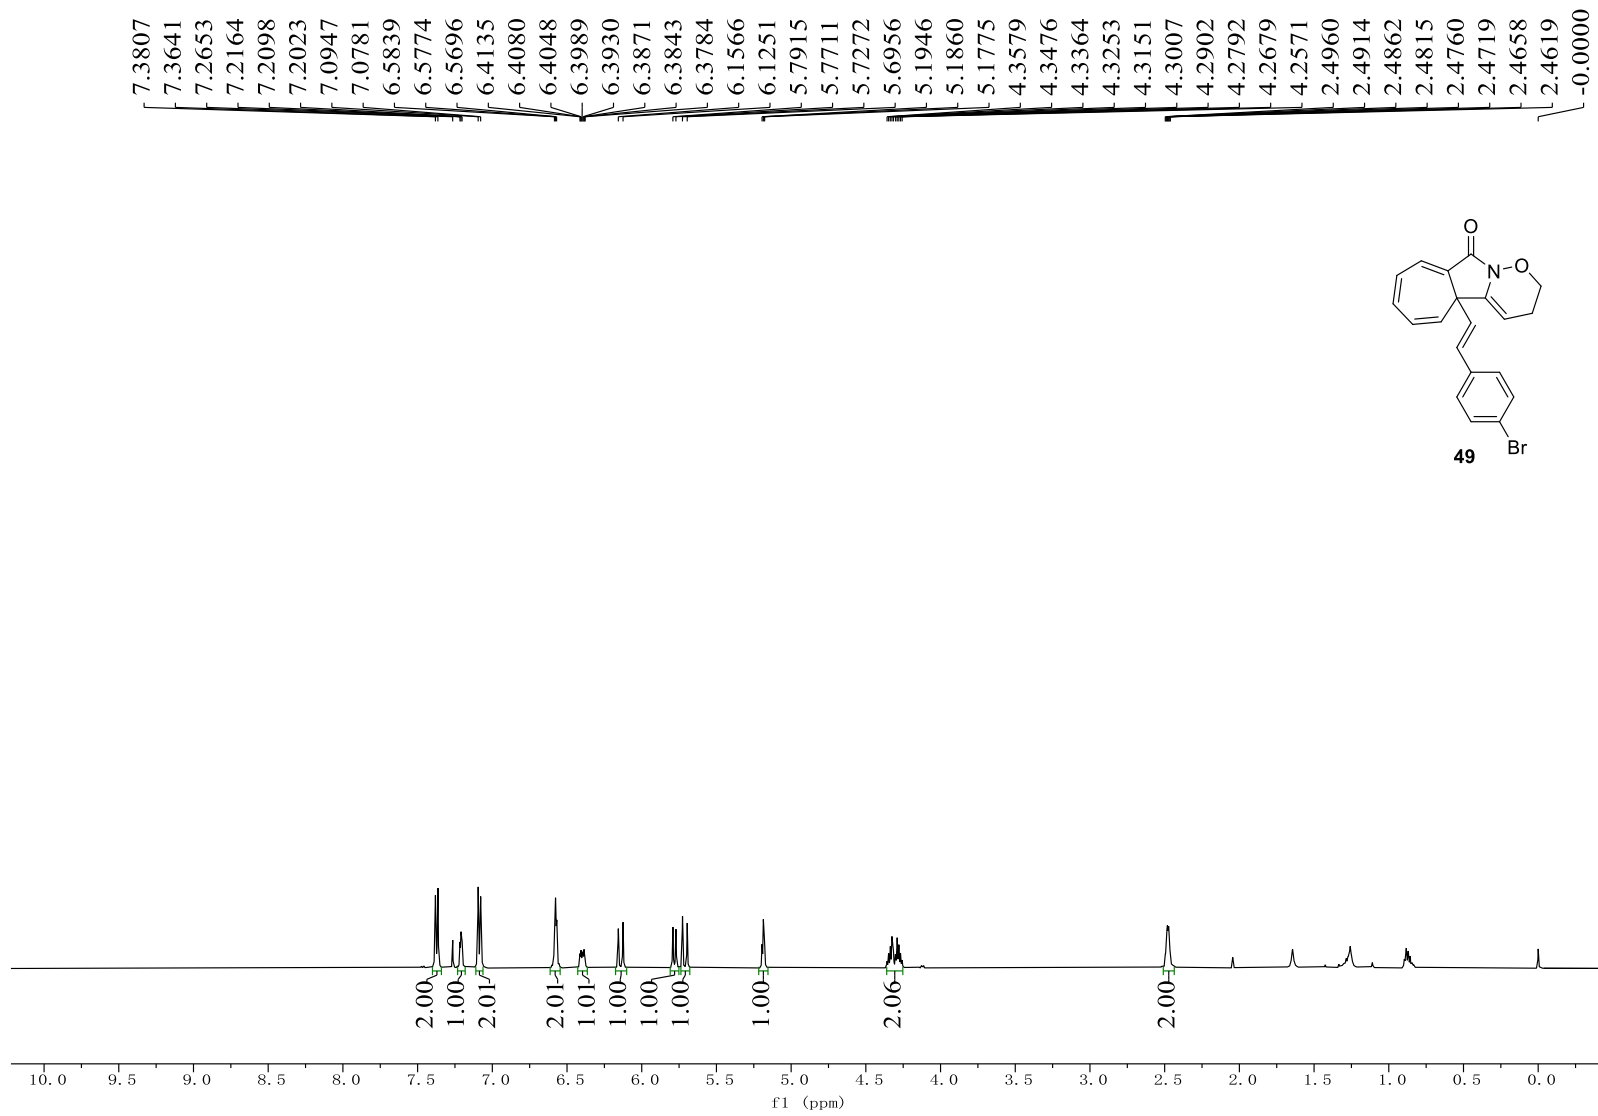

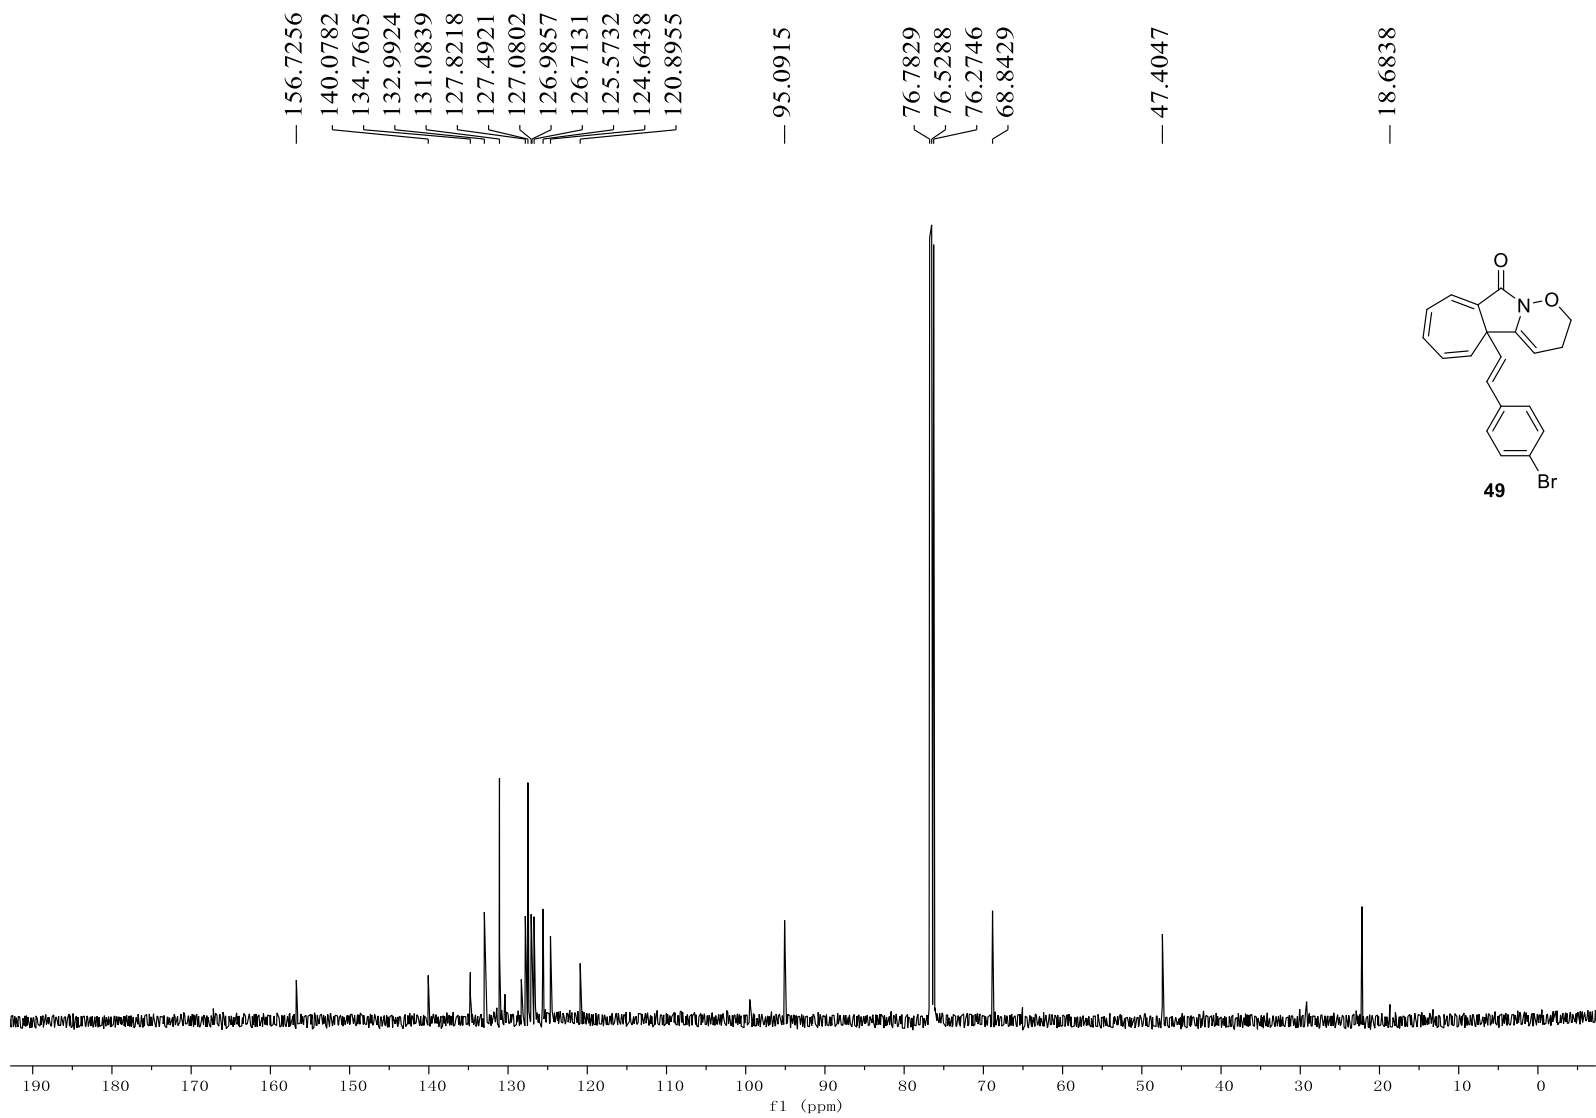

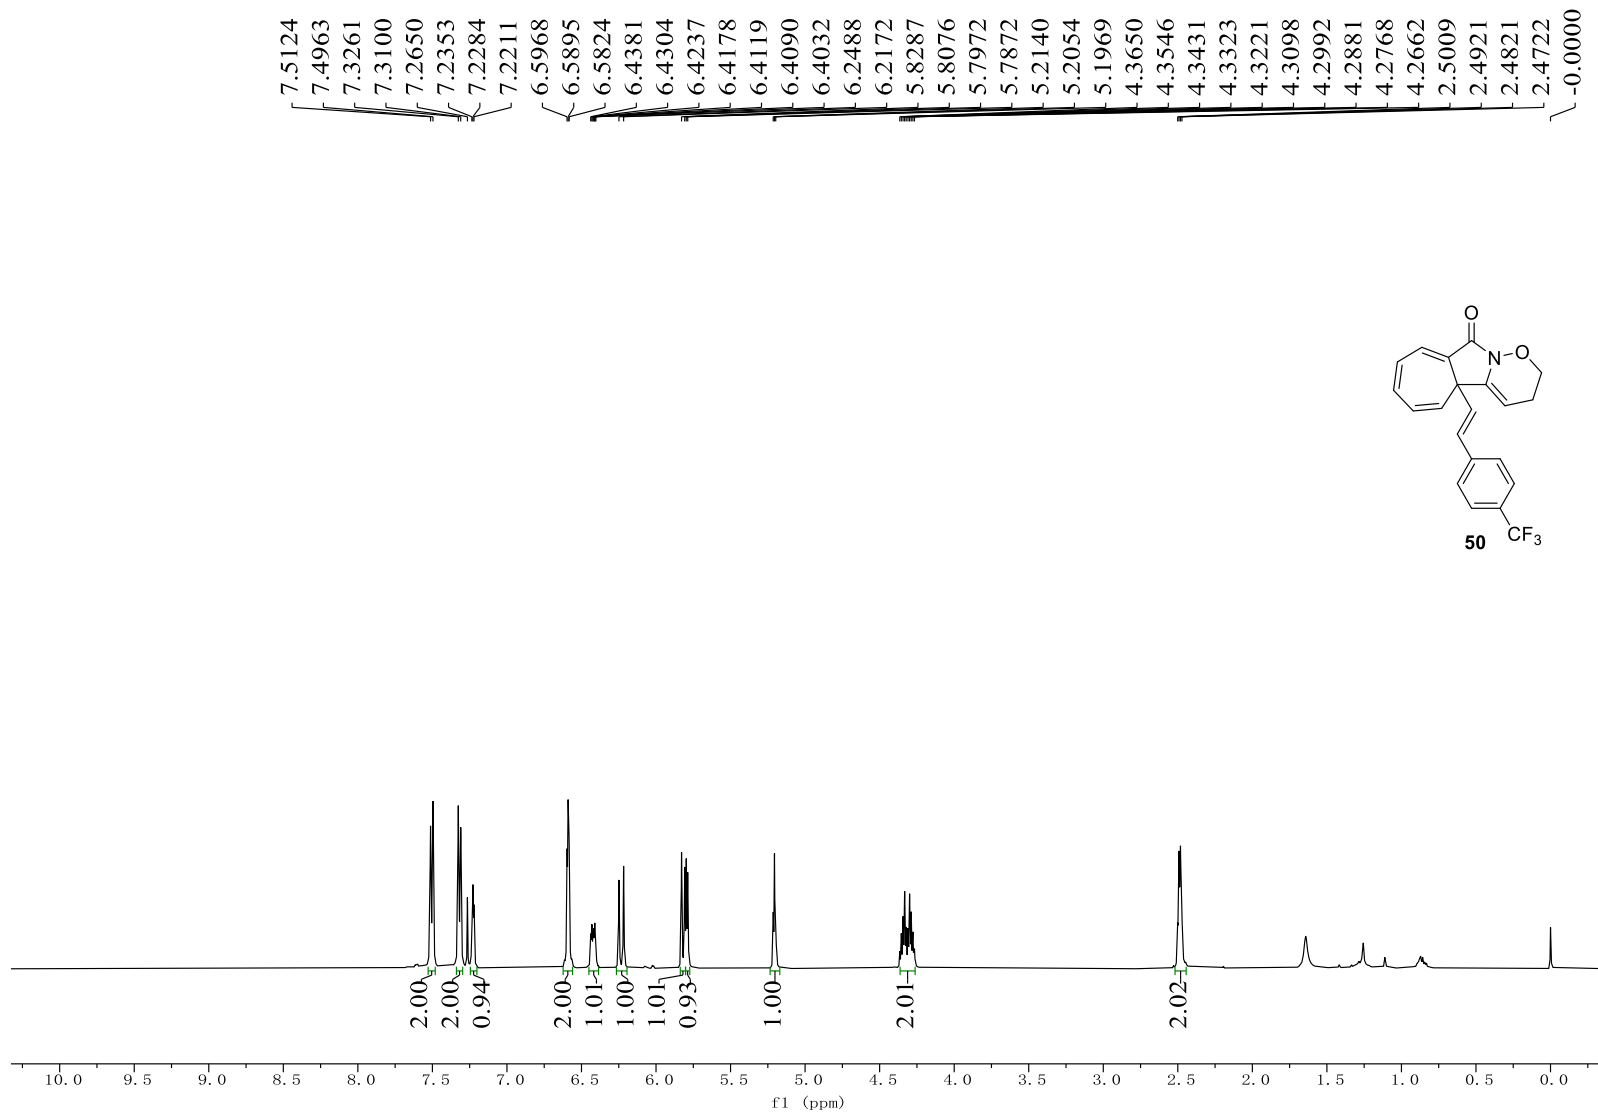

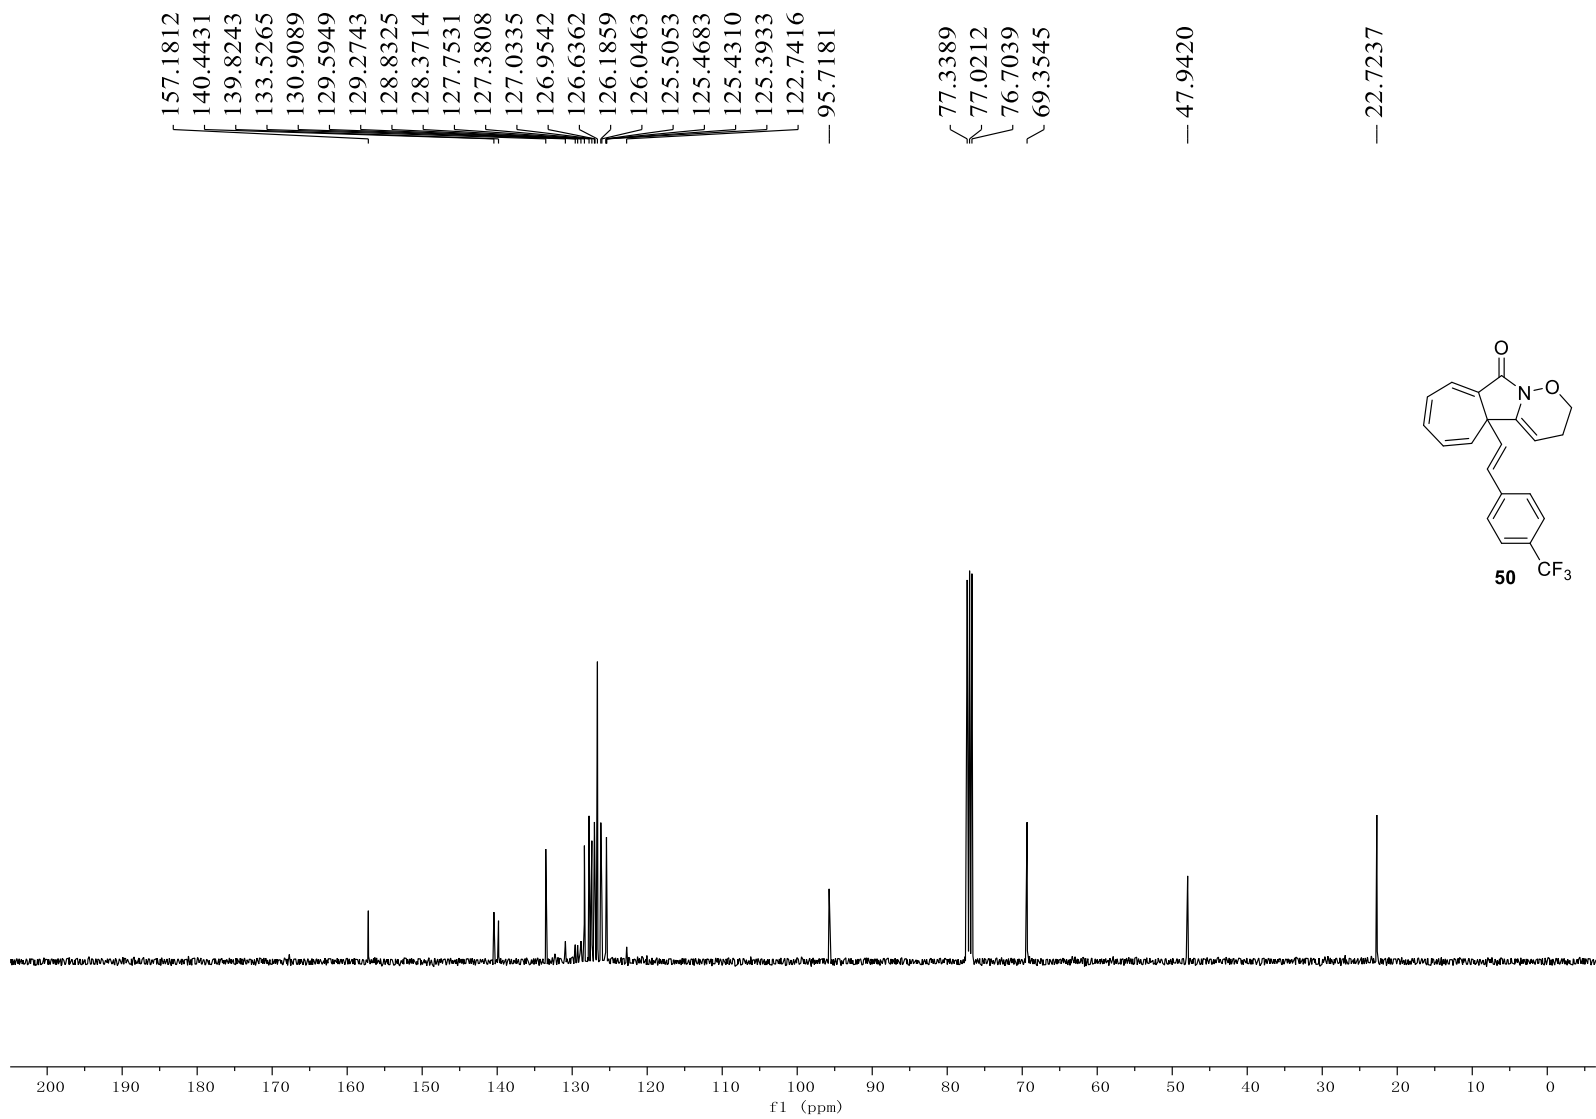



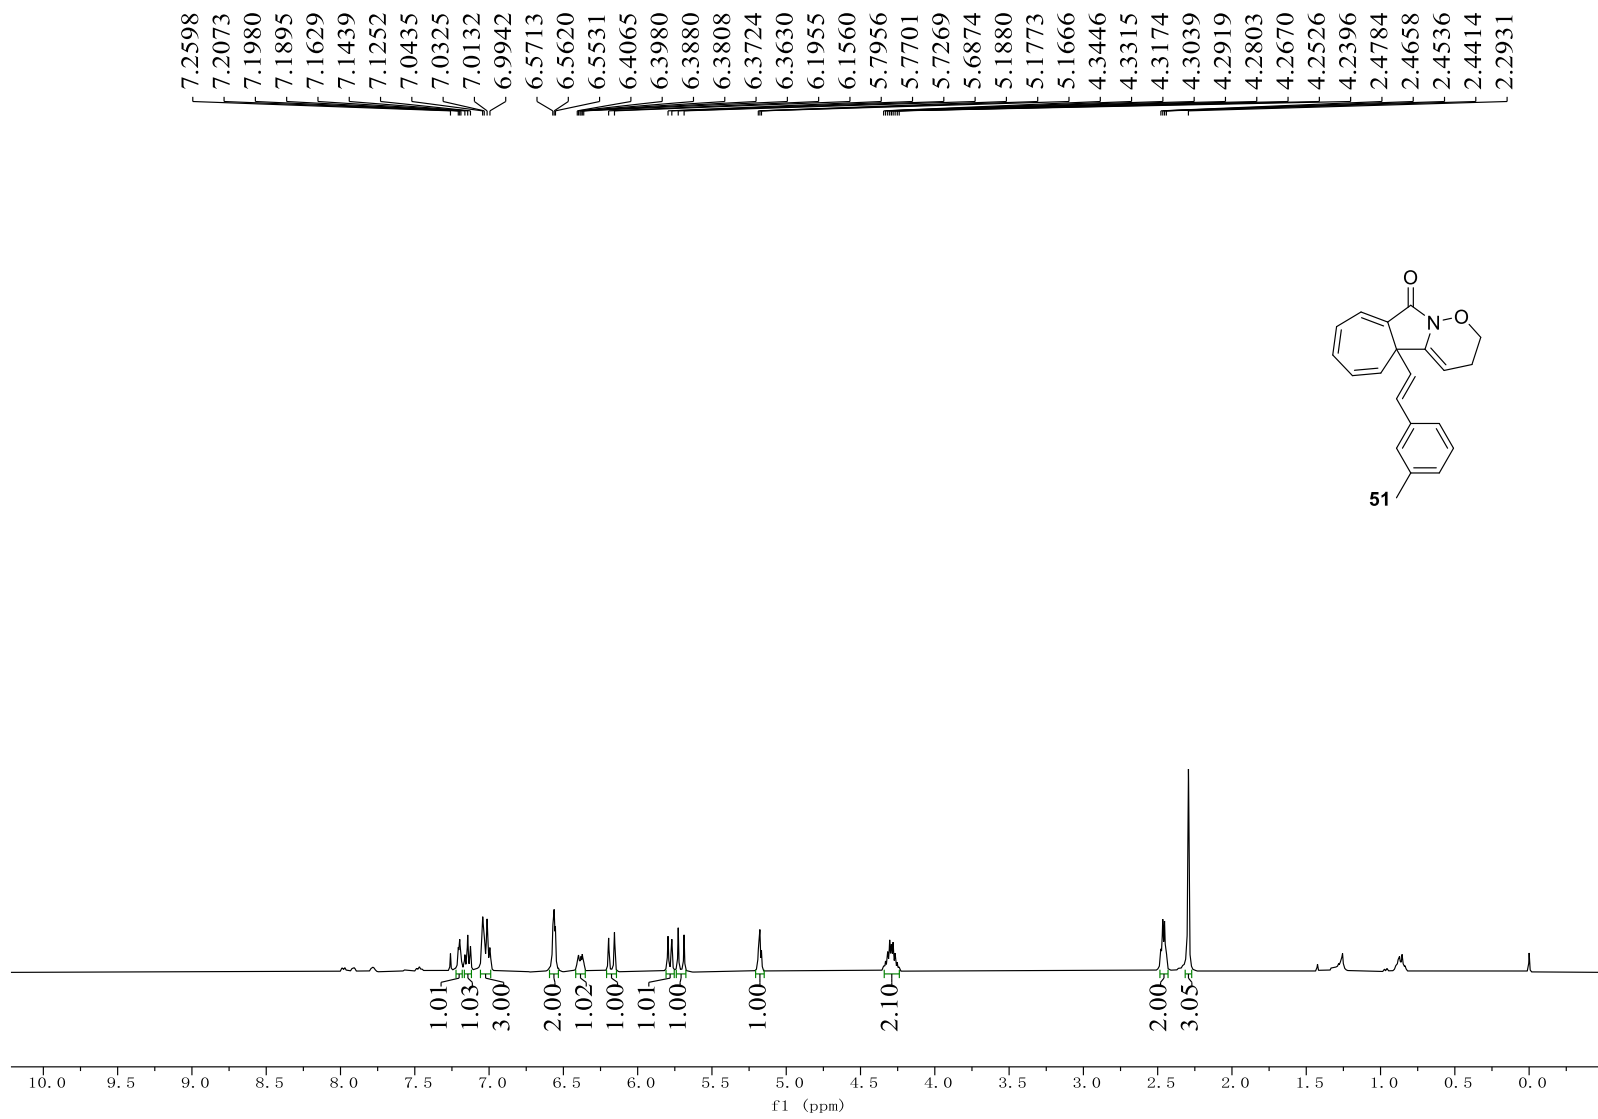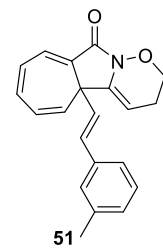

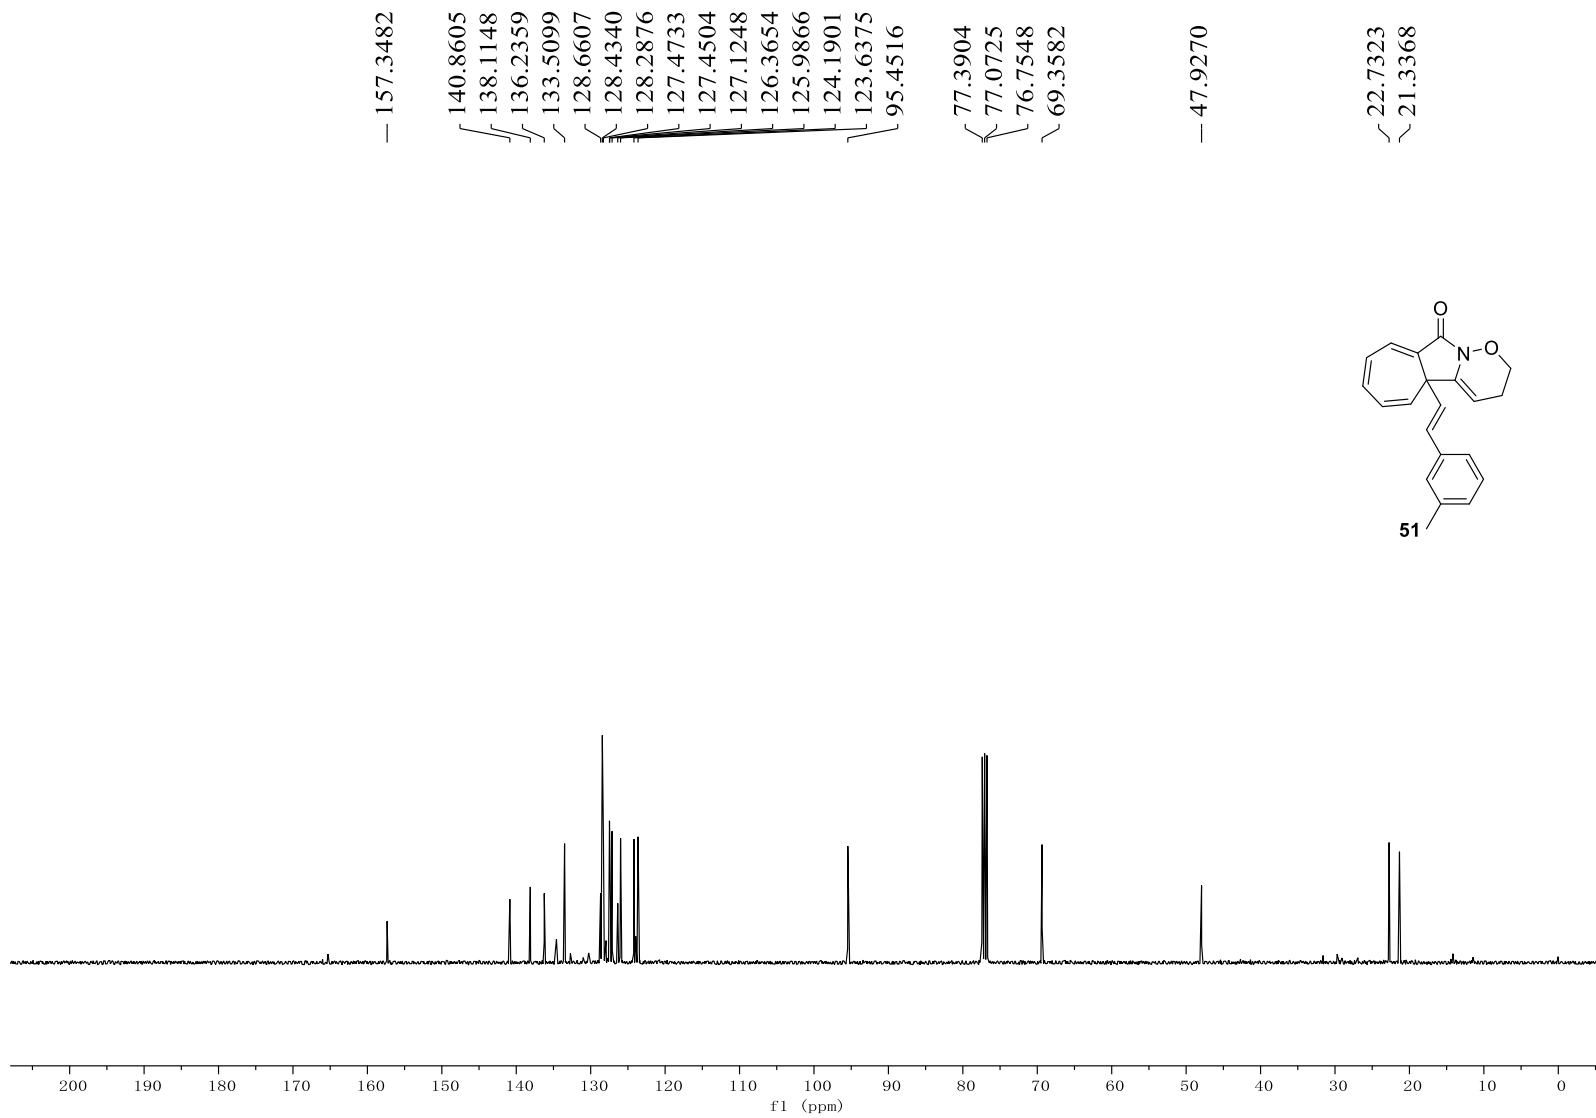

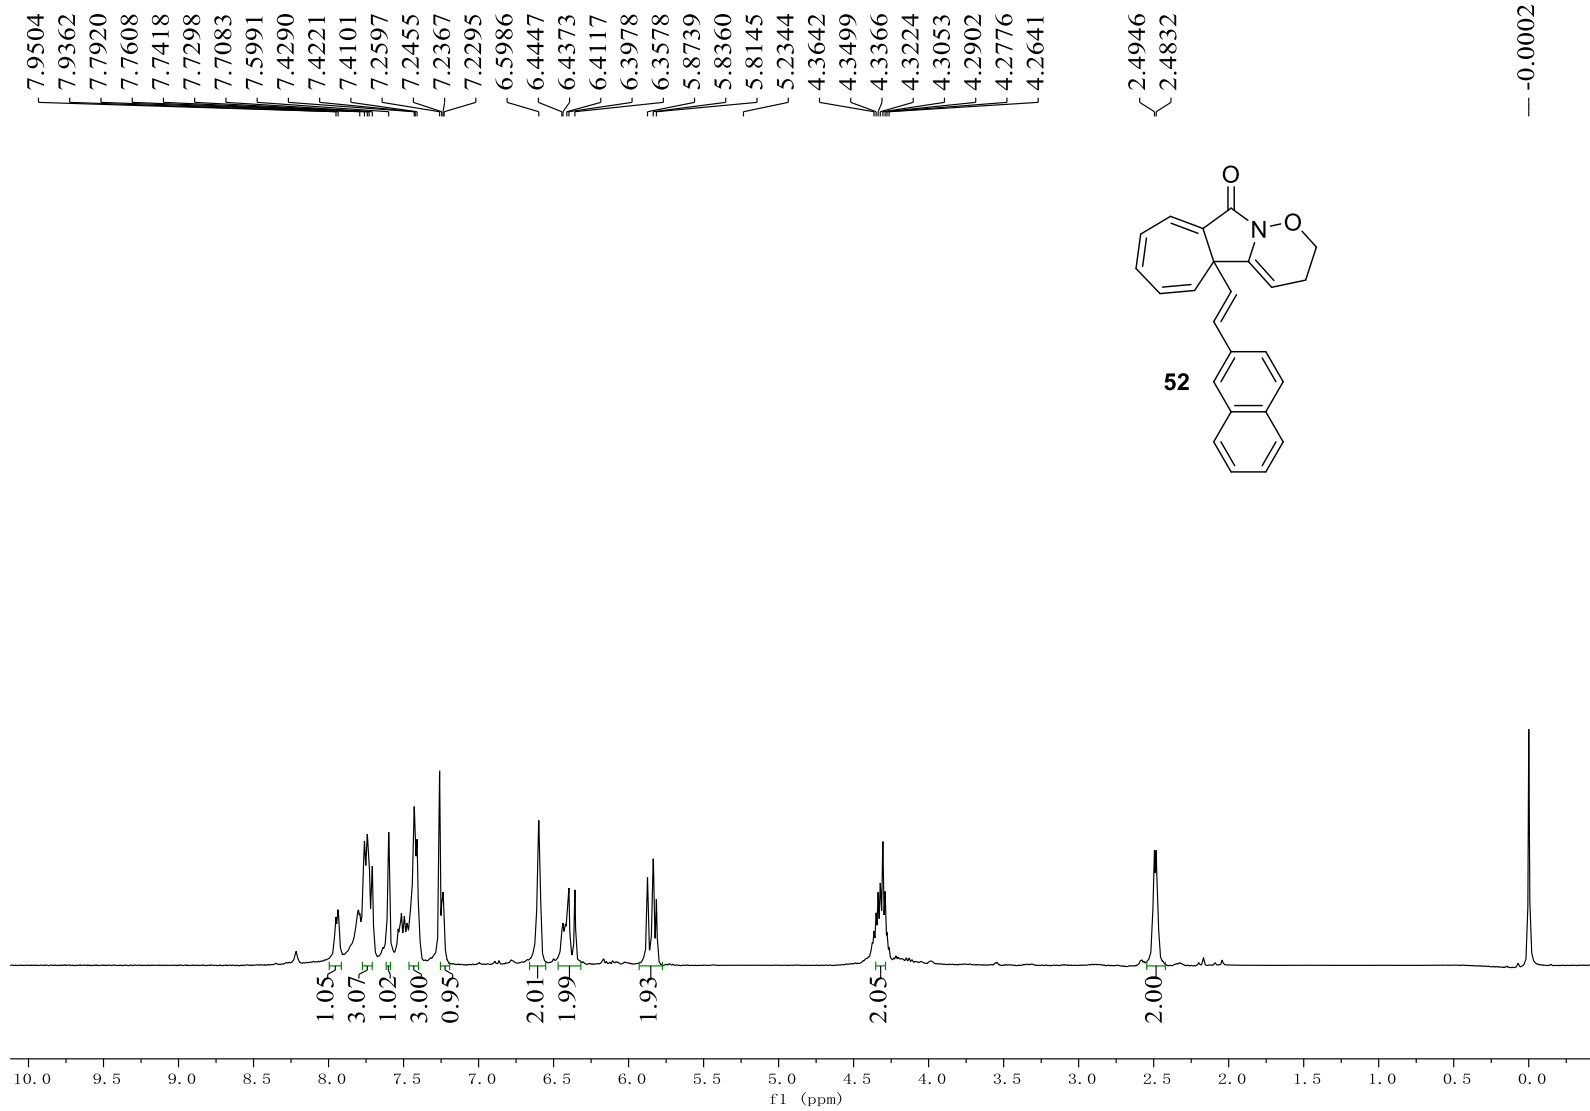

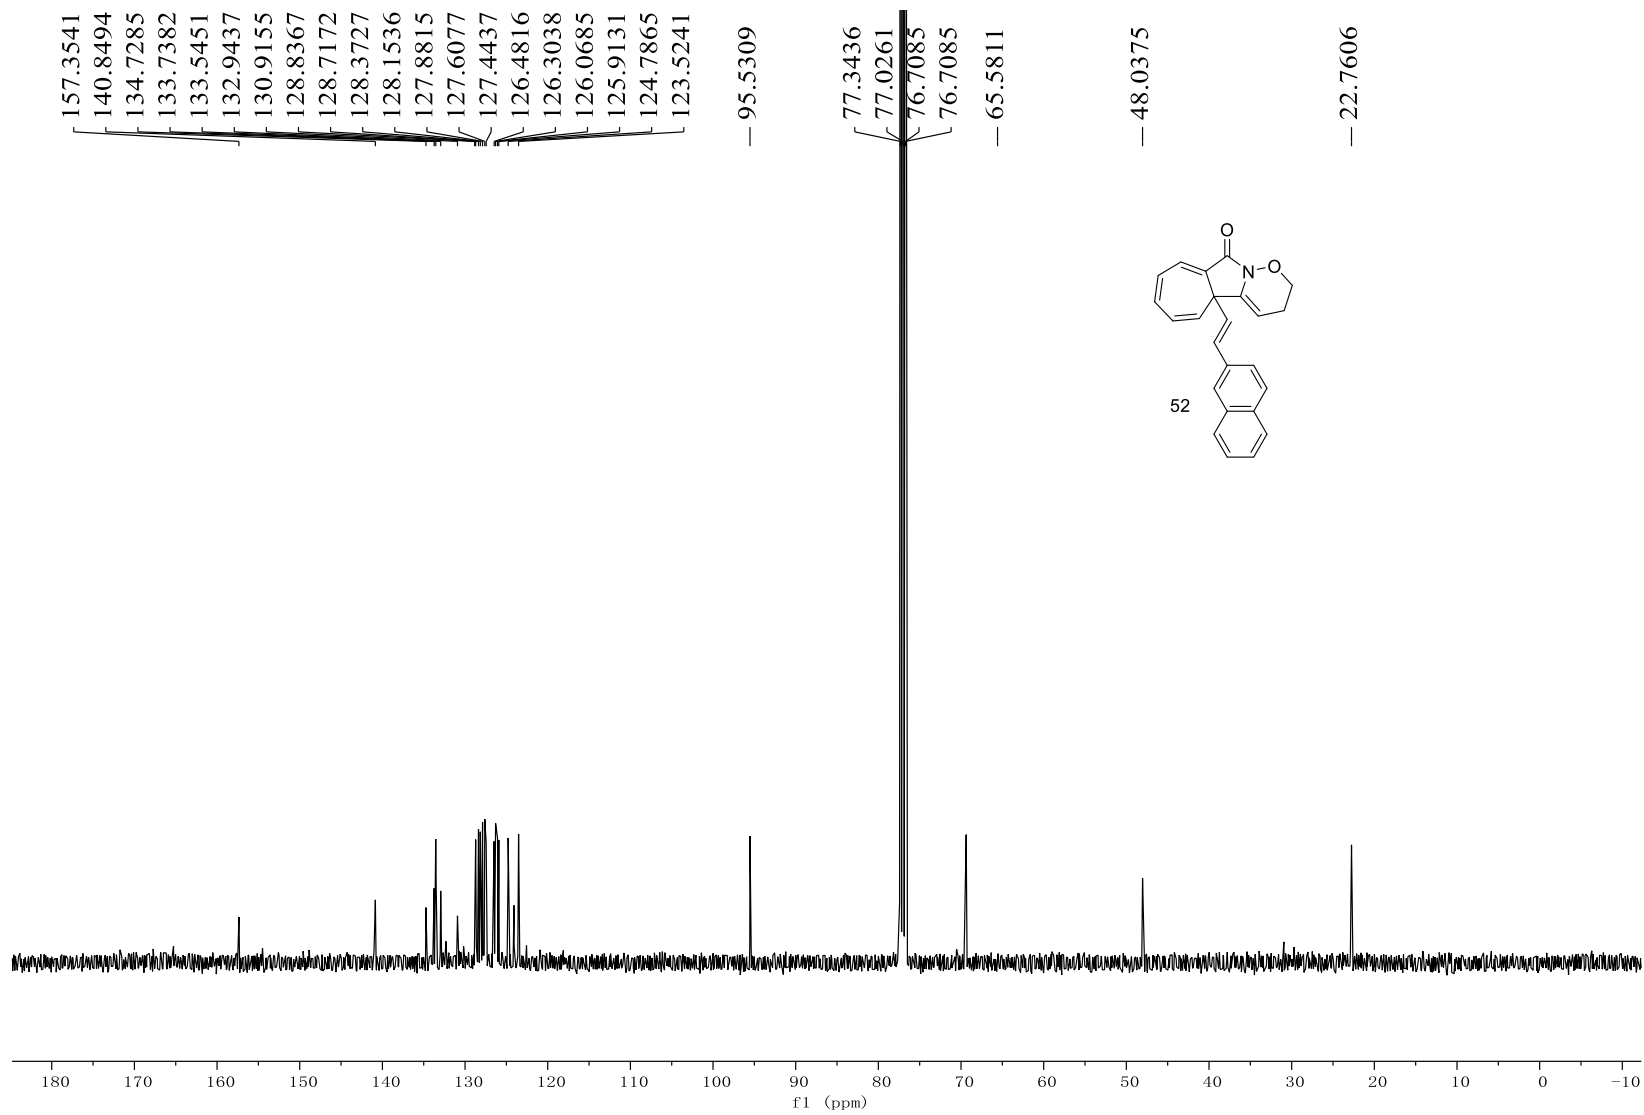

7.3214  
7.3066  
7.2647  
7.2264  
7.2139  
7.1996  
7.1865  
7.1226  
7.1188  
7.1083  
7.1055  
7.0947  
7.0909  
6.5756  
6.5628  
6.5534  
6.5408  
6.5139  
6.5015  
6.4918  
6.4793  
6.4465  
6.4372  
6.4293  
6.4166  
5.9442  
5.9239  
5.1540  
5.1455  
5.1370  
4.3077  
4.2968  
4.2864  
- 3.1839  
2.5004  
2.4905  
2.4811  
2.4660  
2.4560  
2.4466  
2.4365  
2.4188  
2.4090  
2.3994  
2.3892  
2.3744  
2.3648  
2.3548

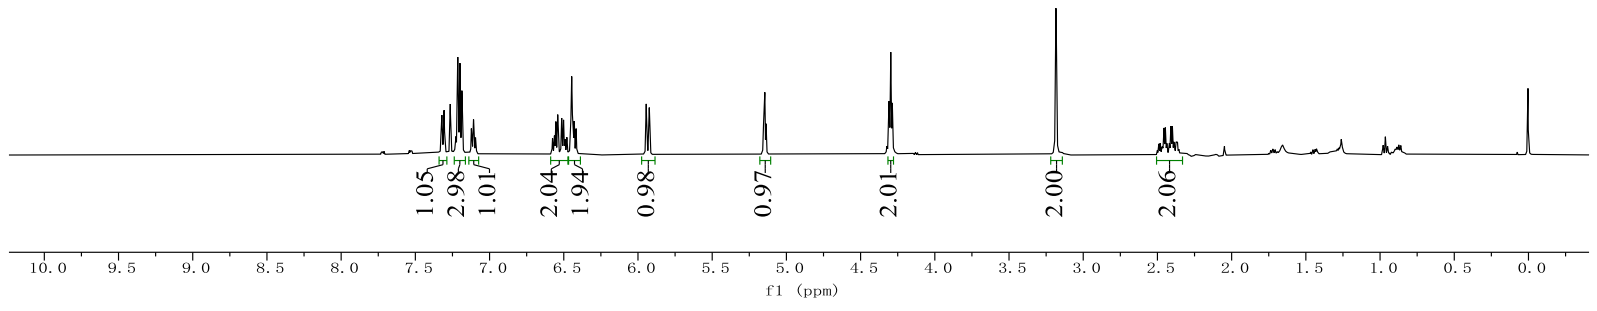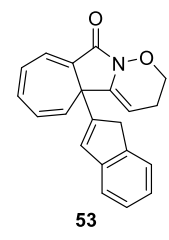

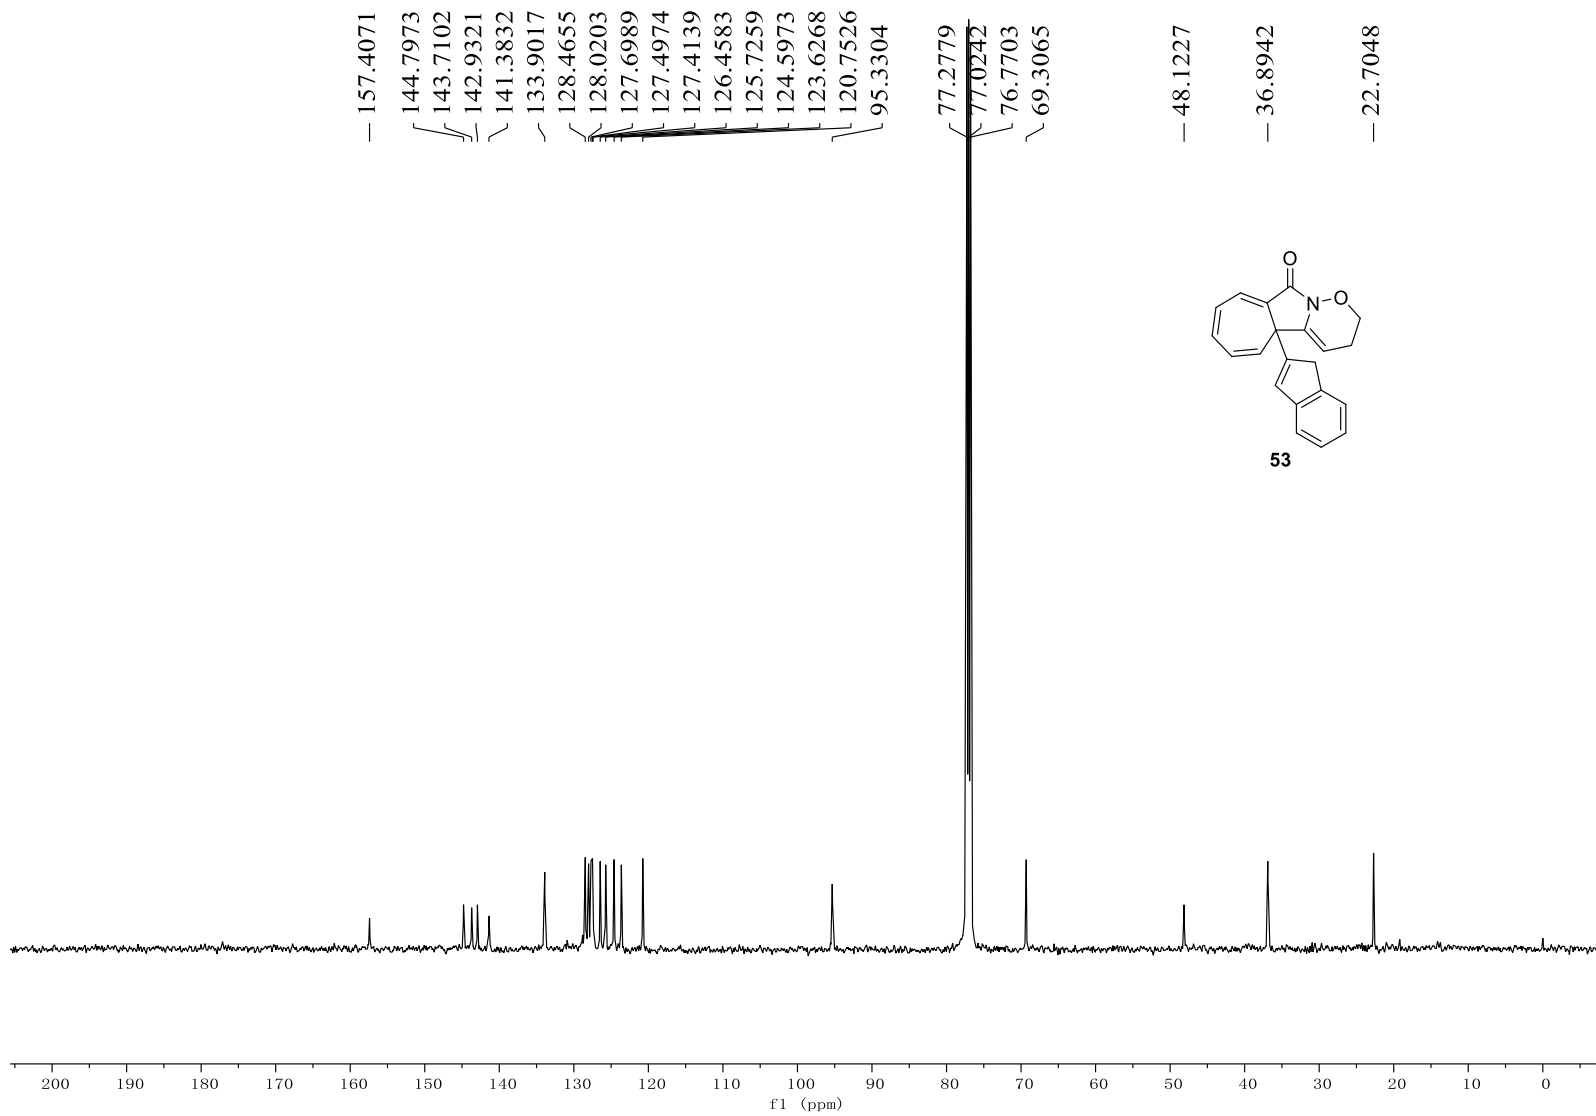

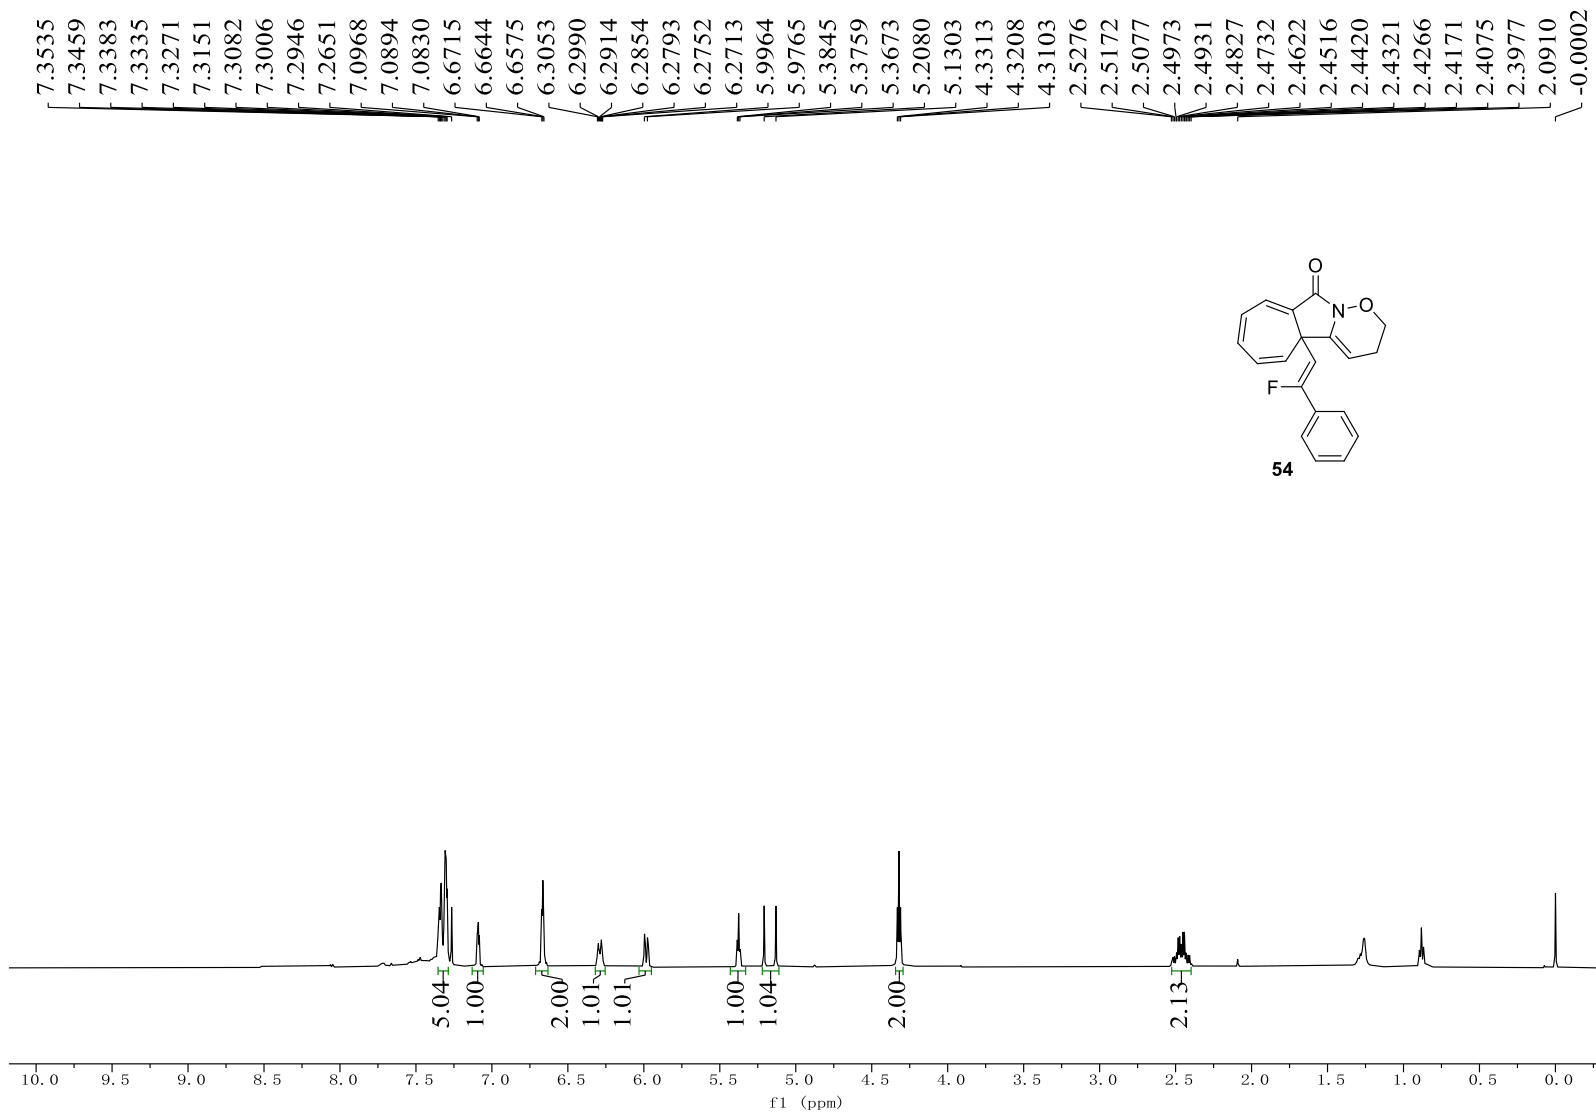

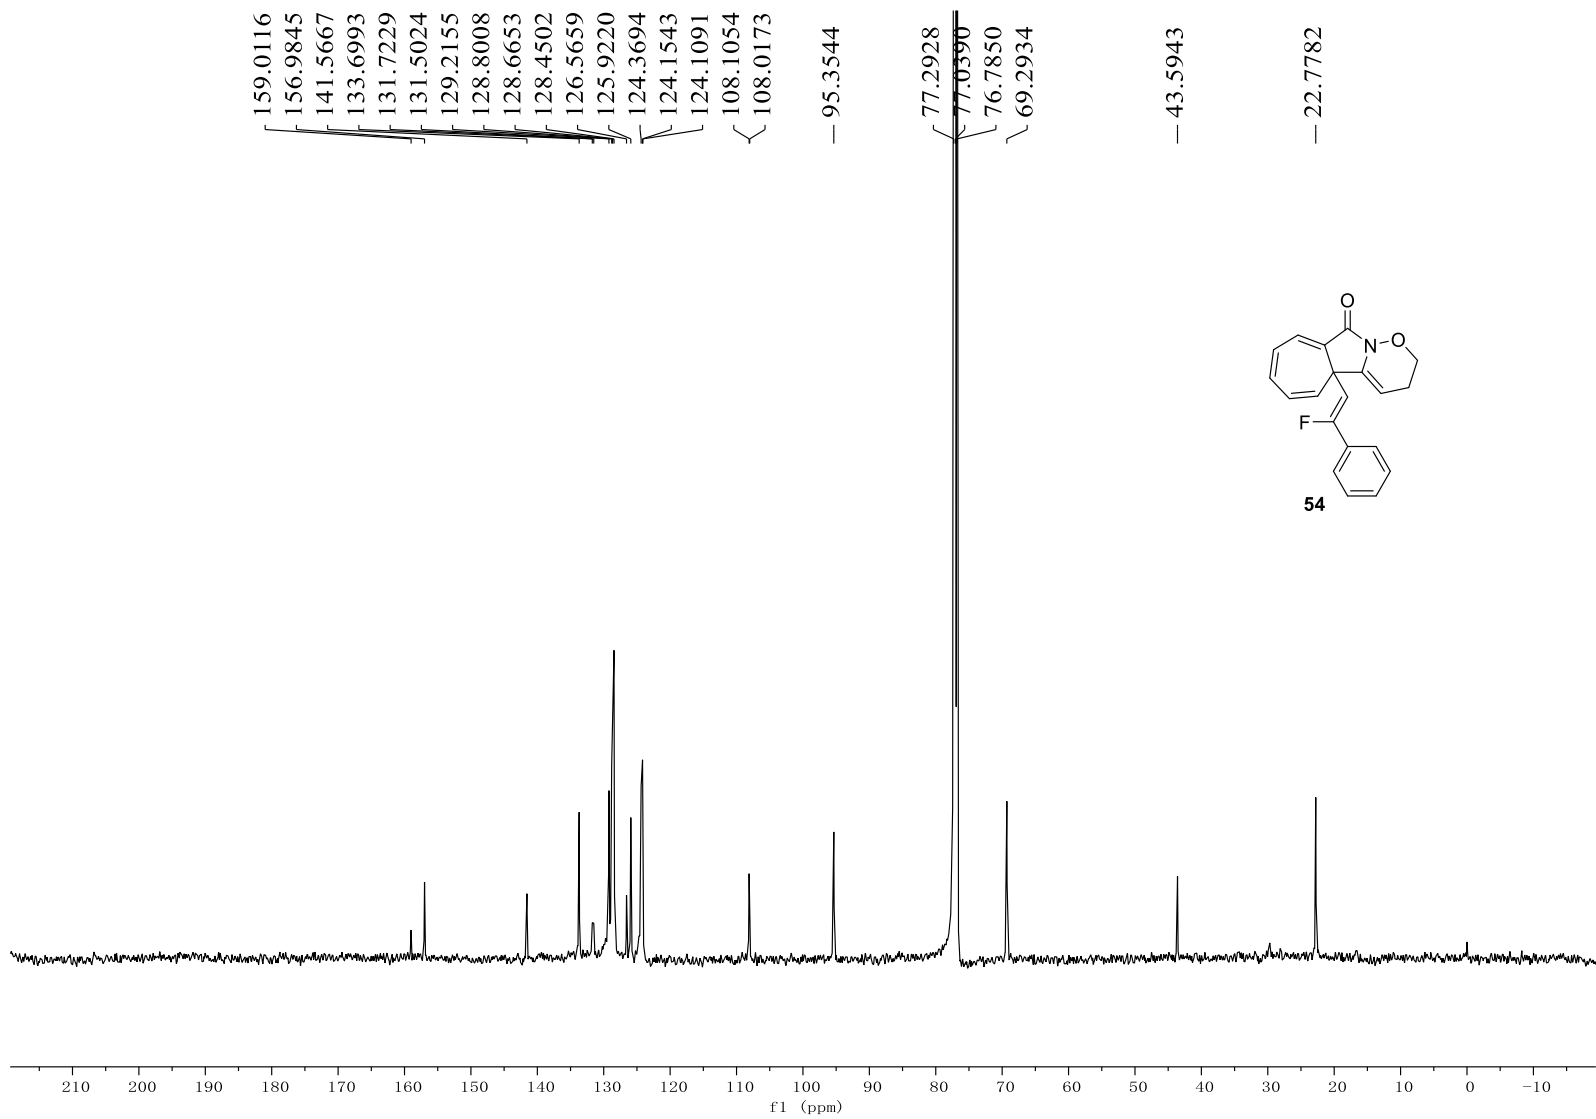



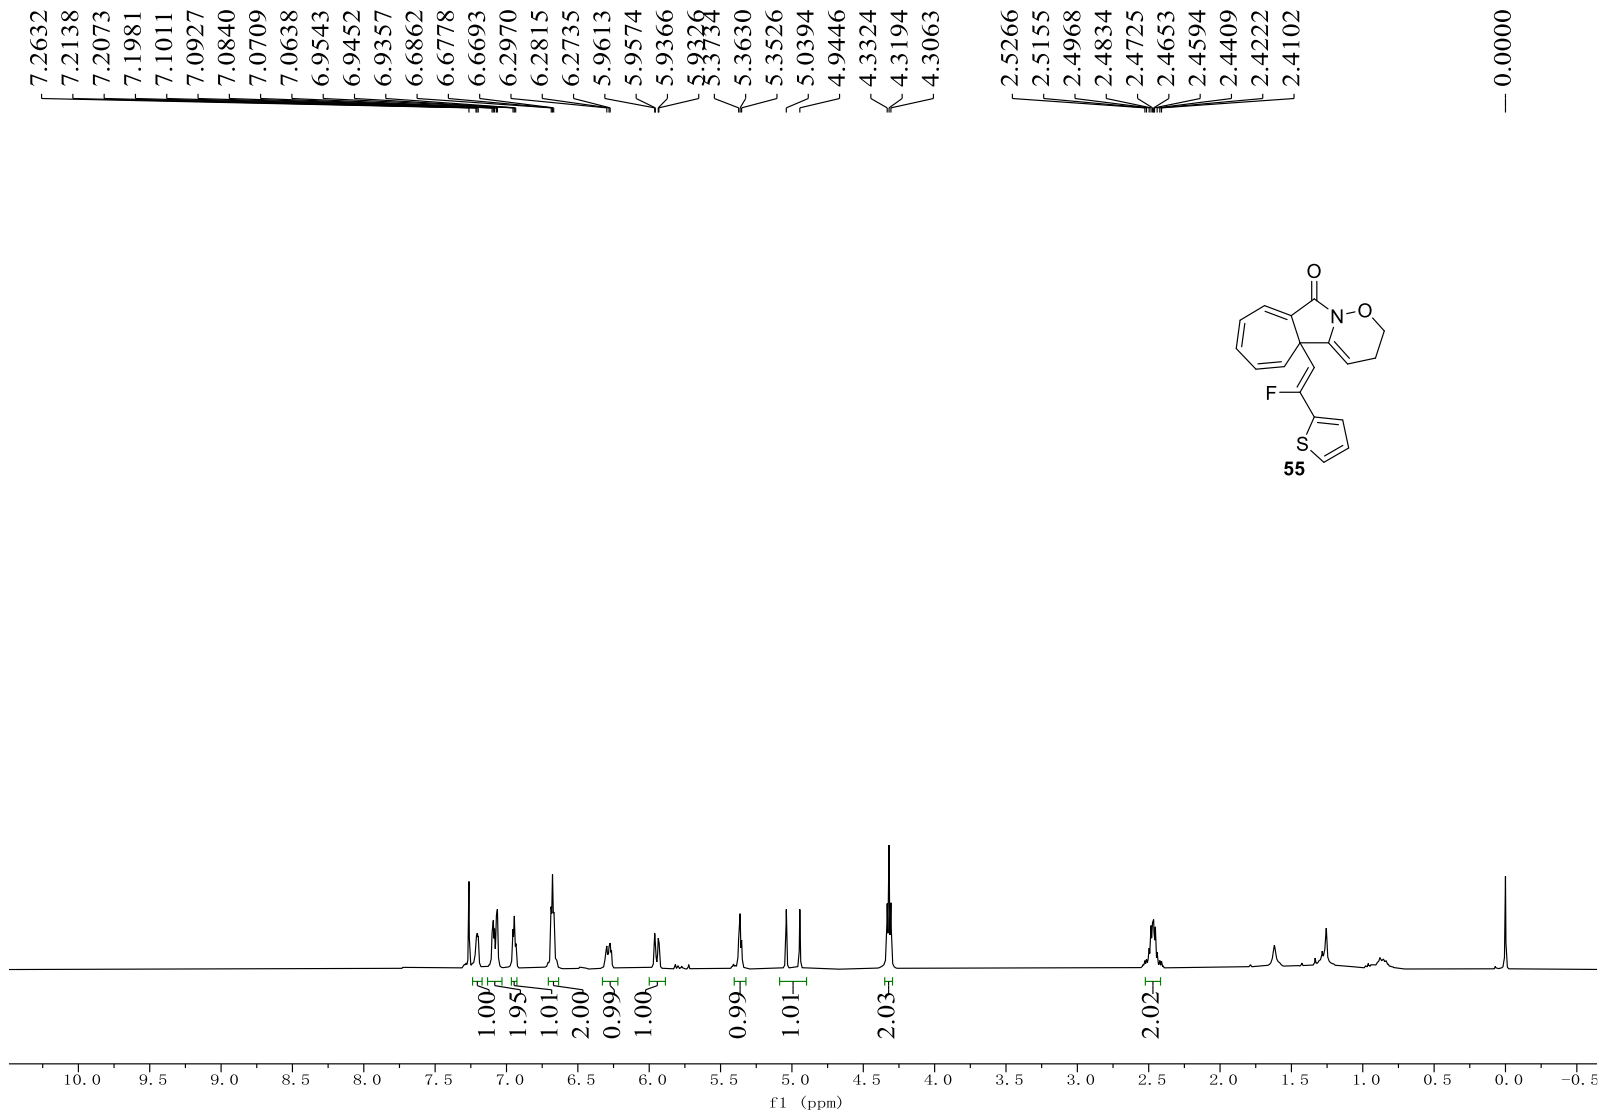

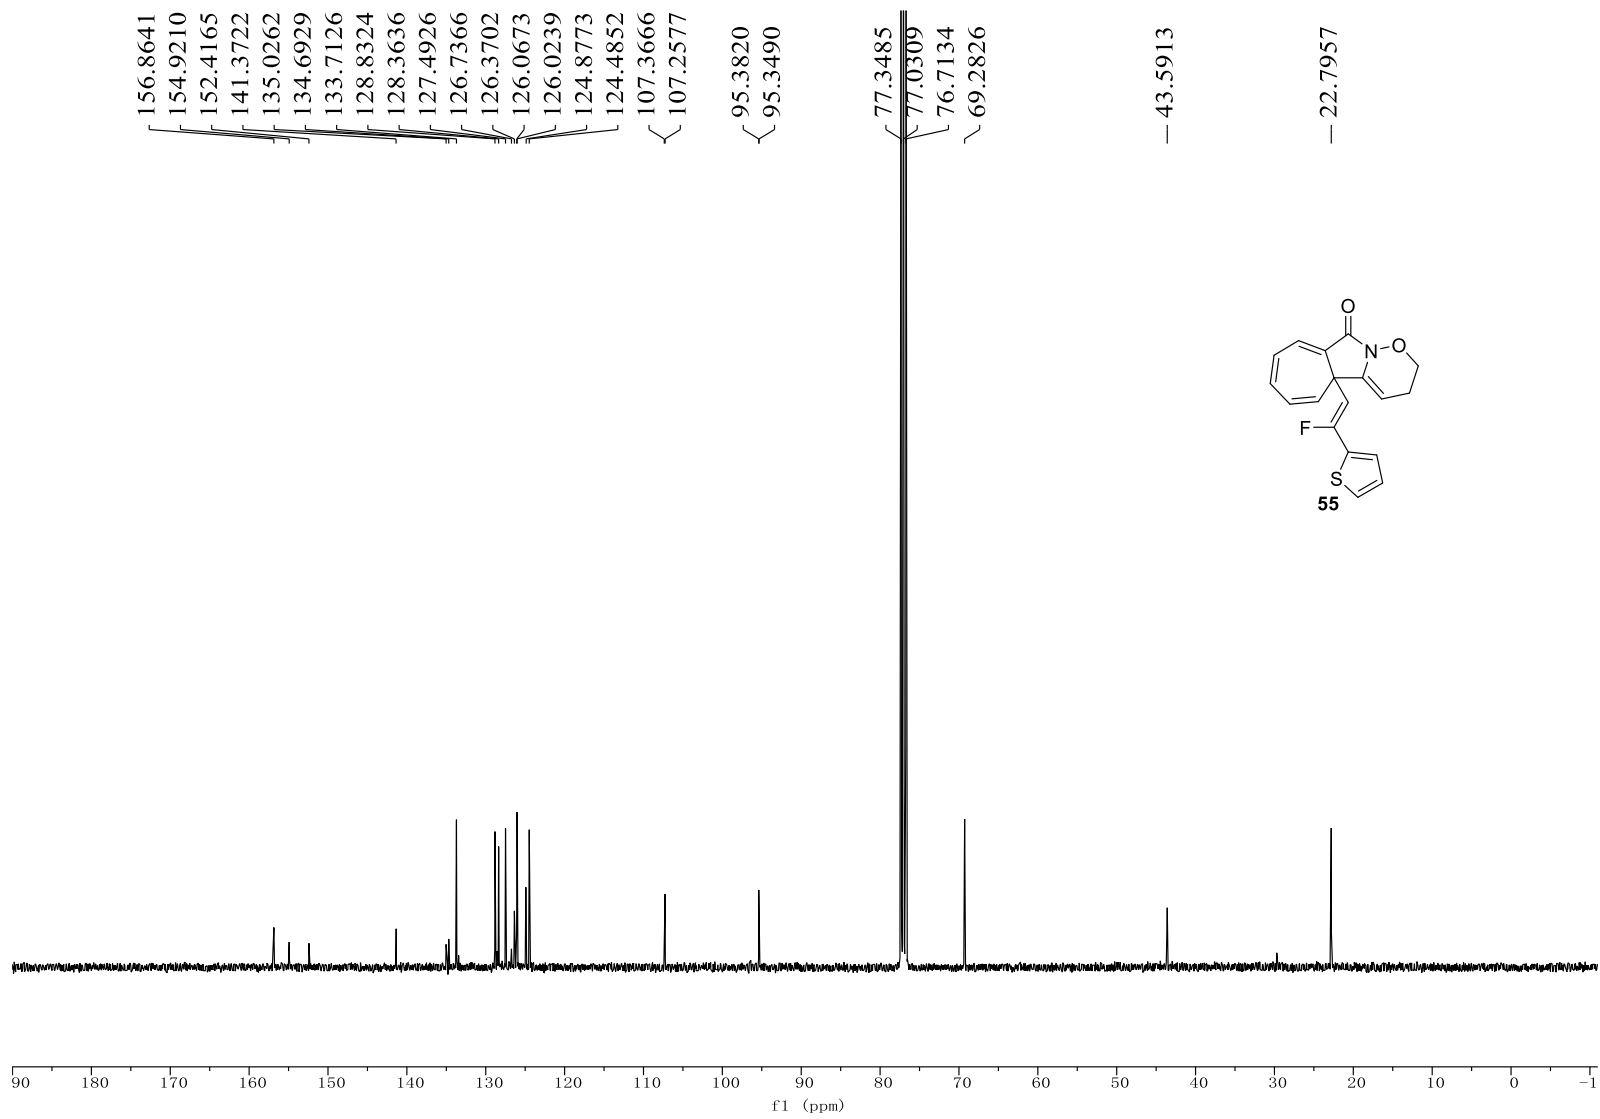

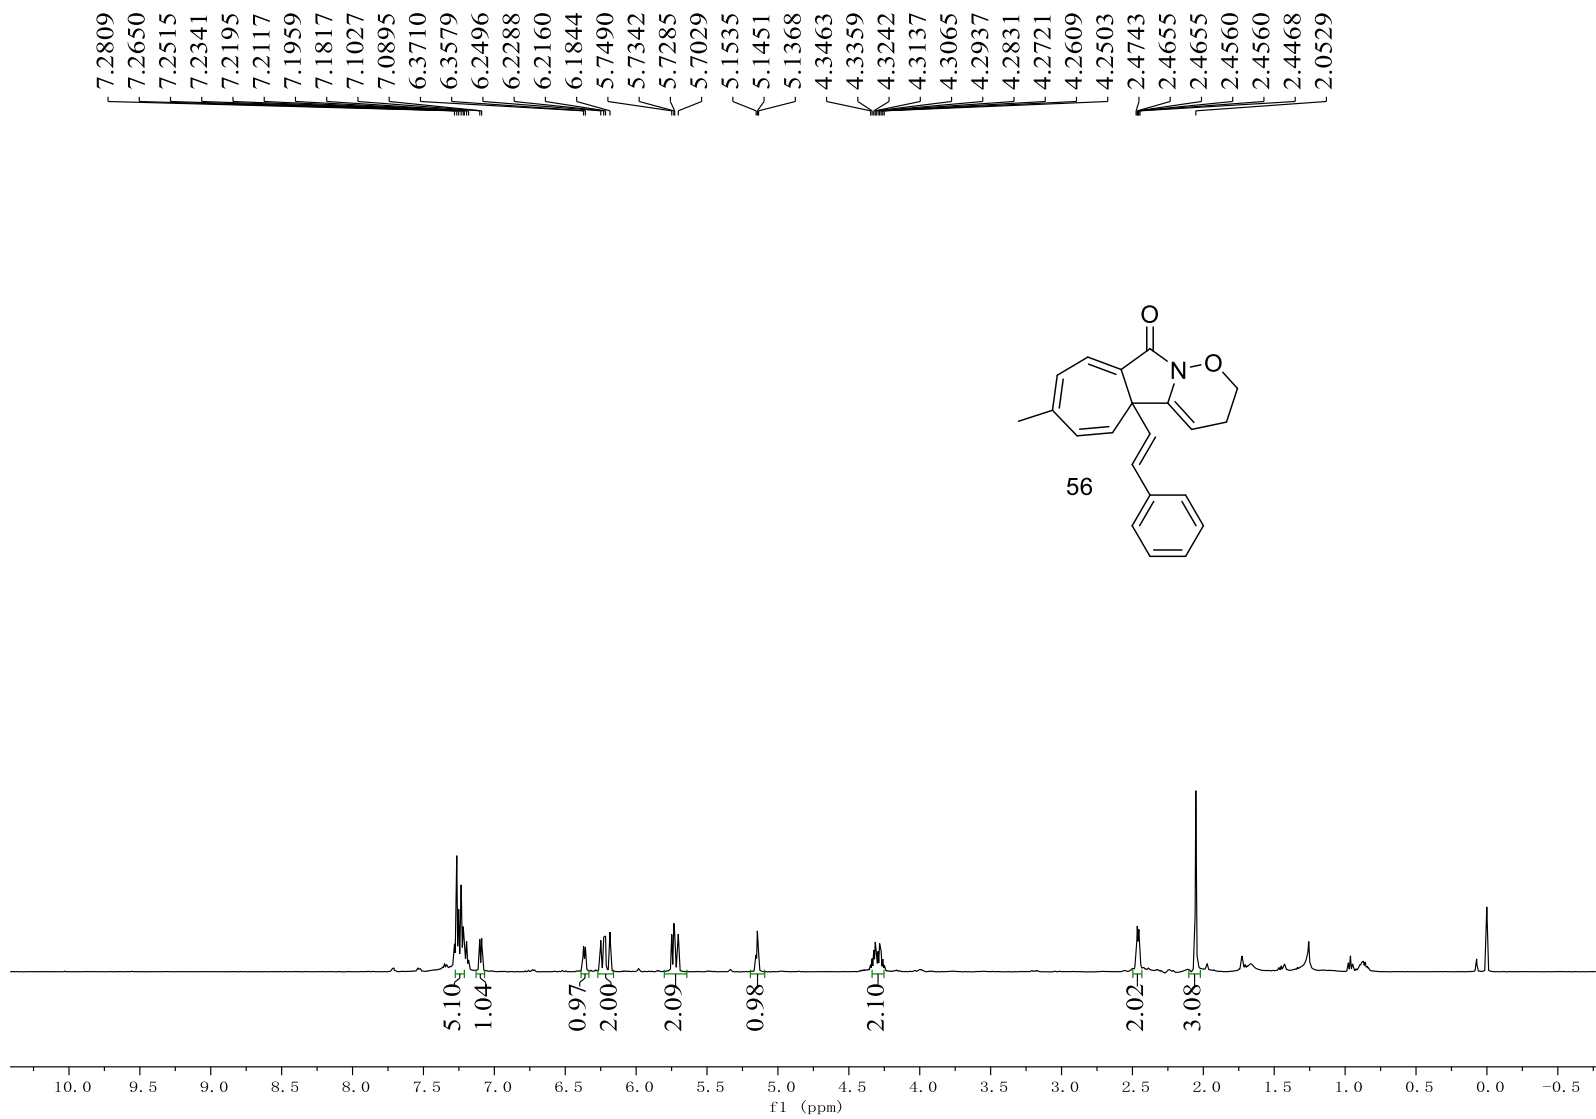

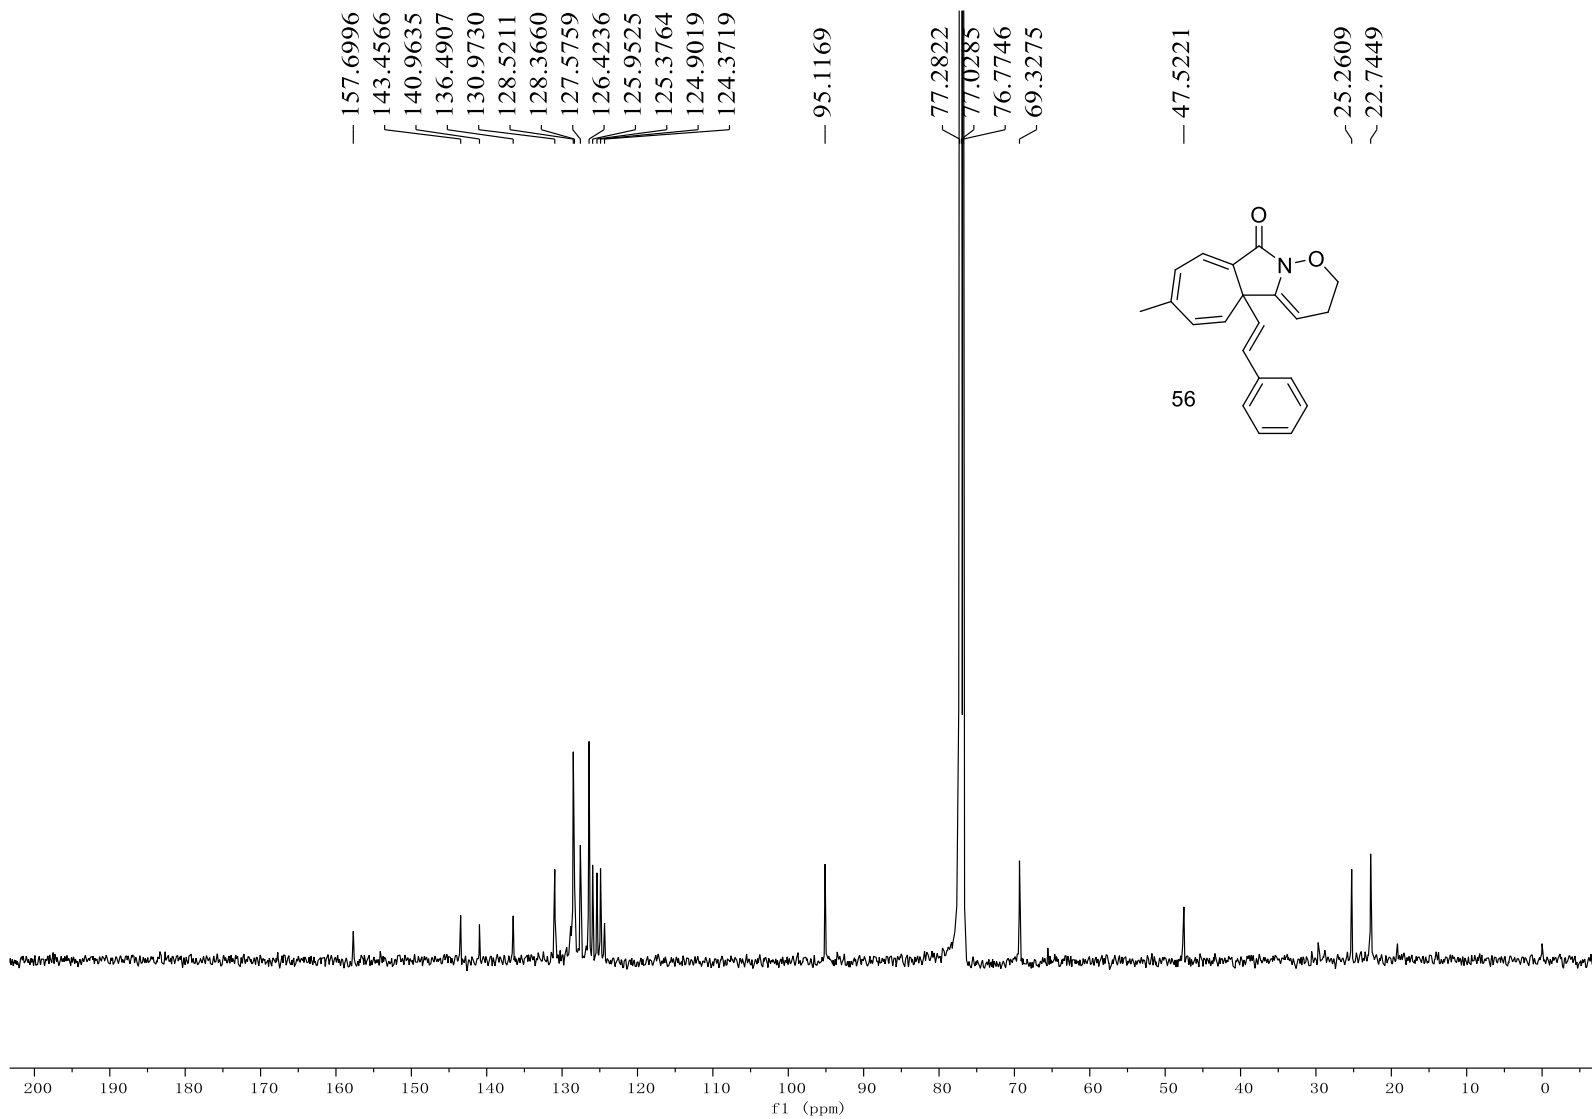

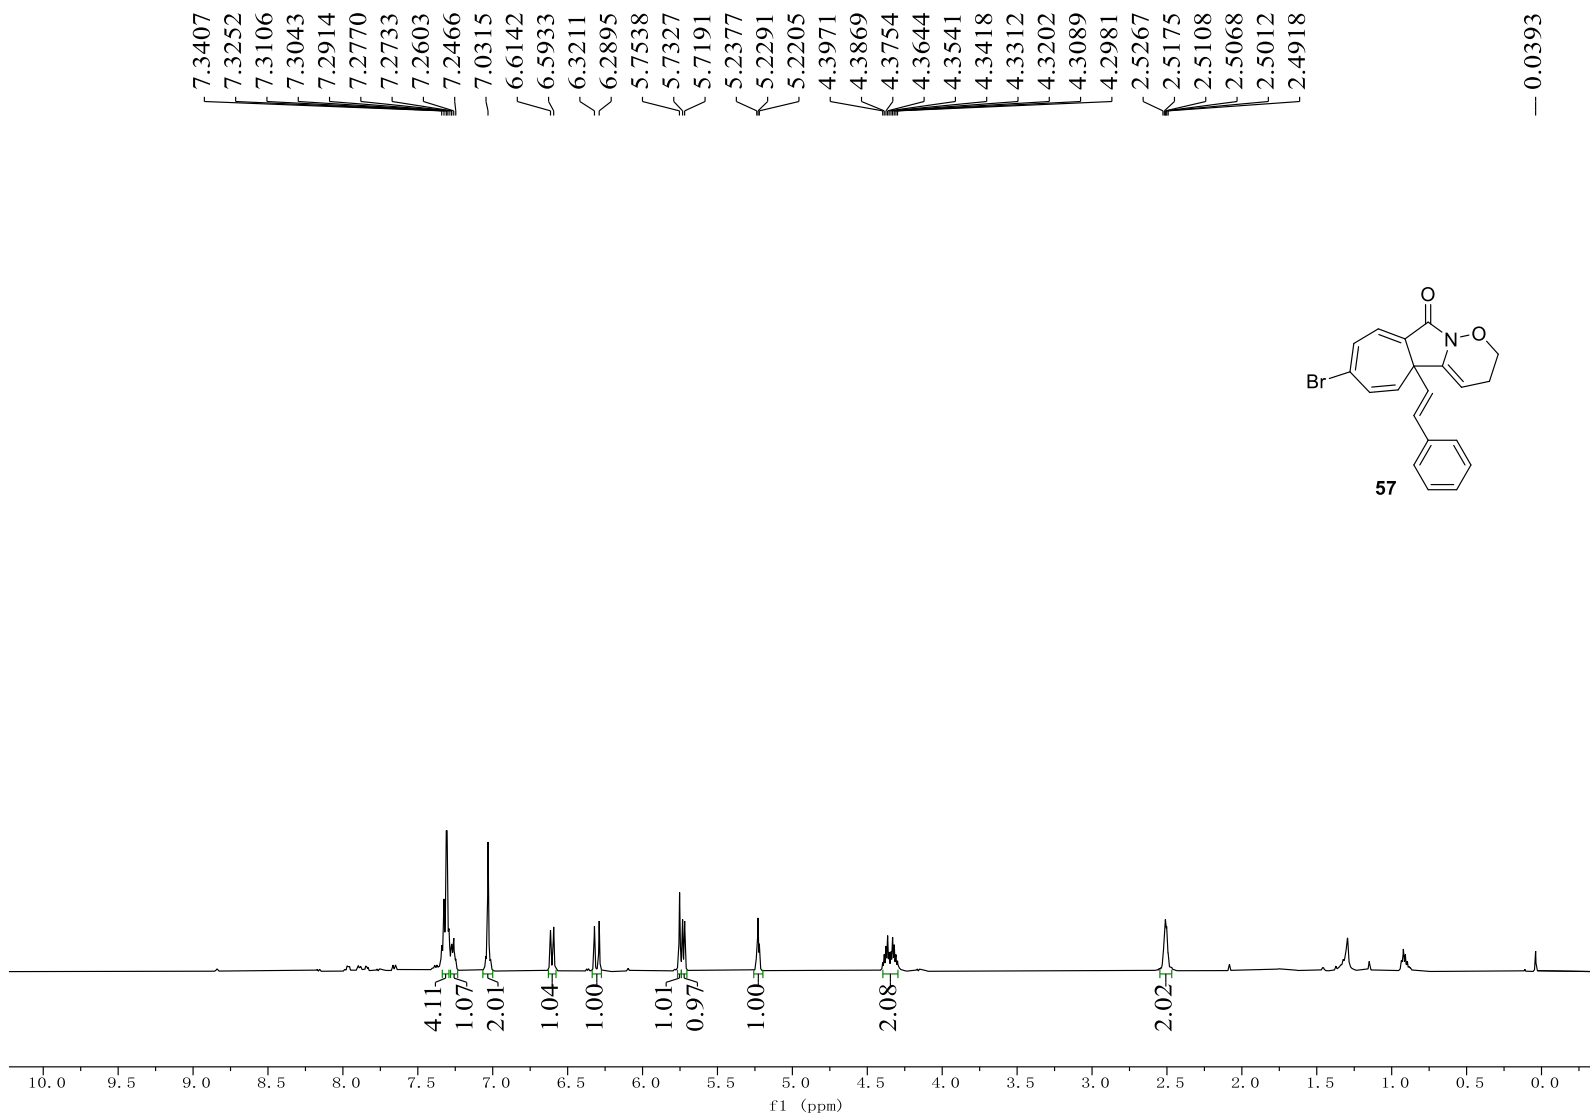

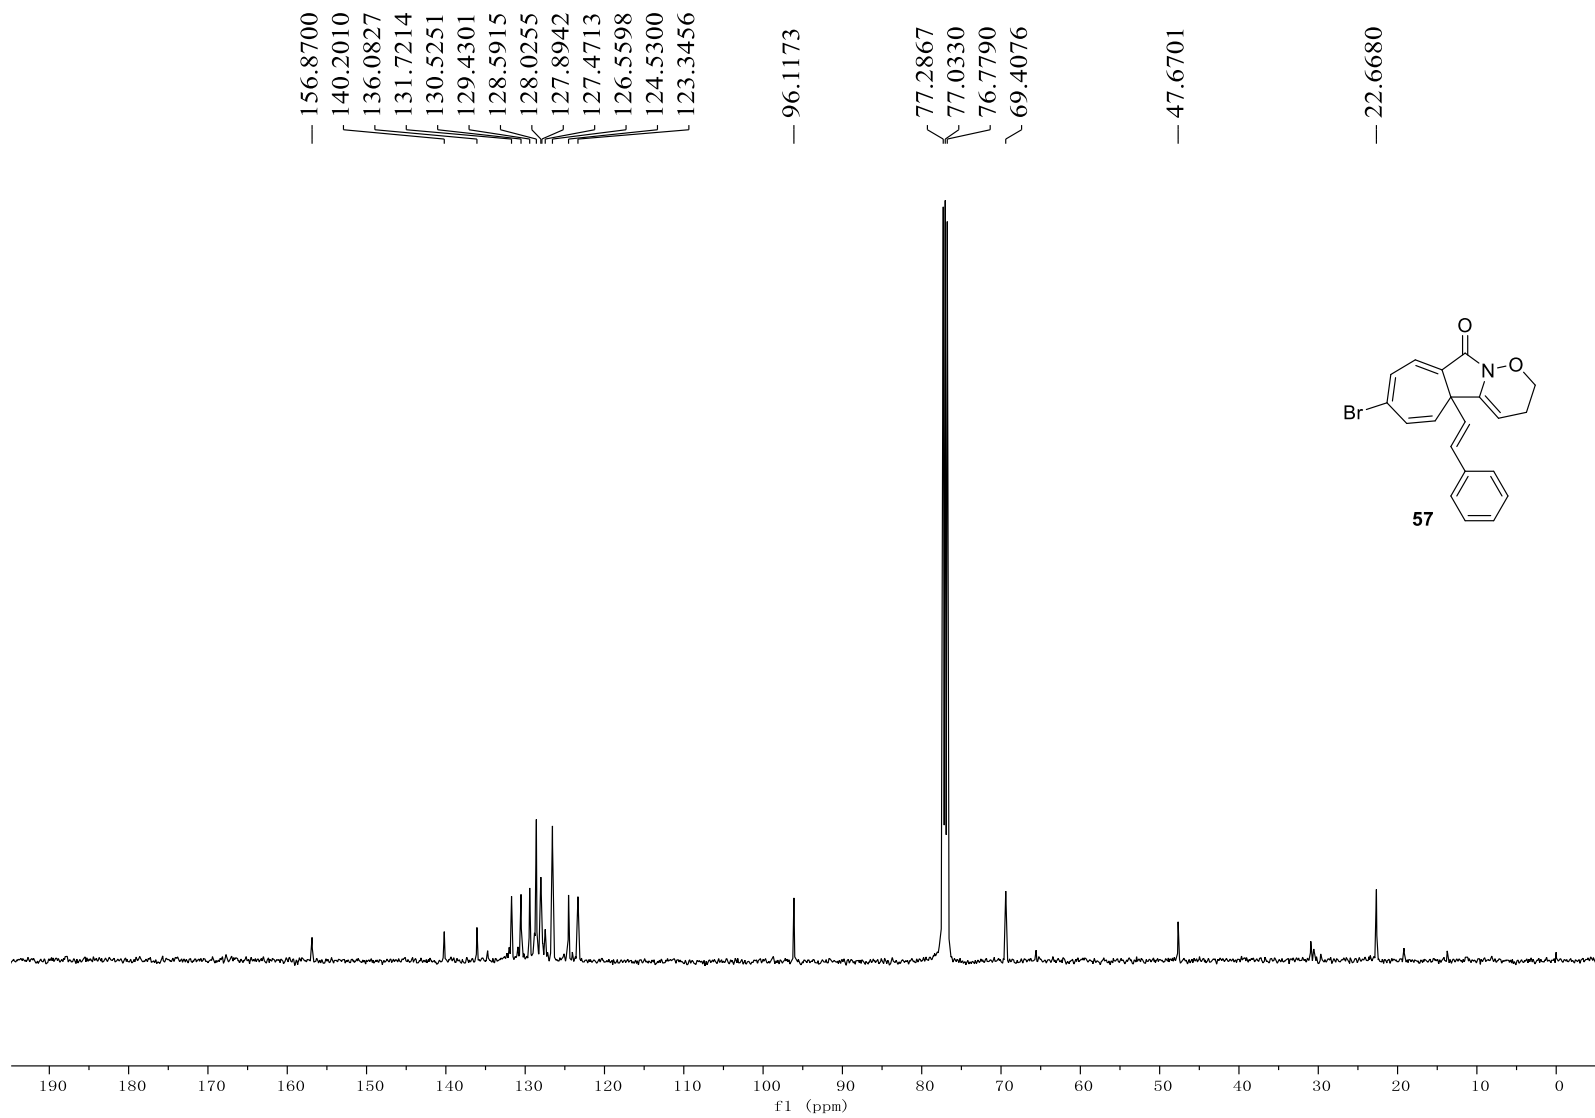

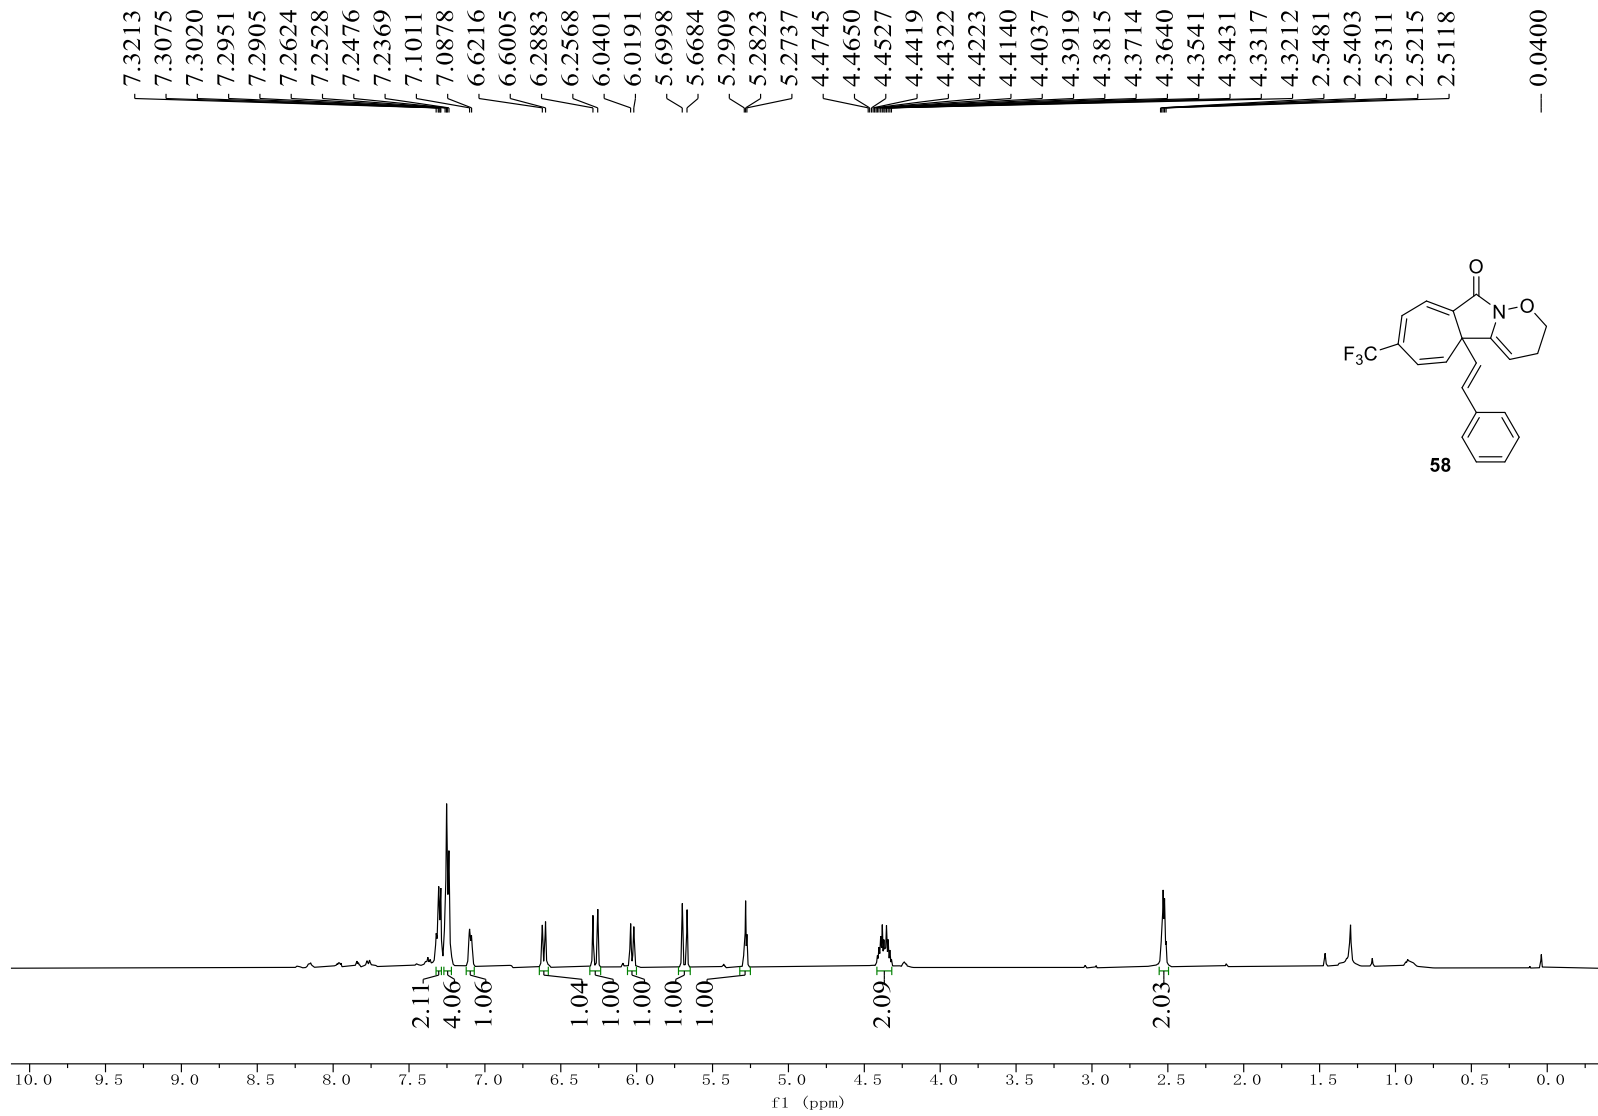

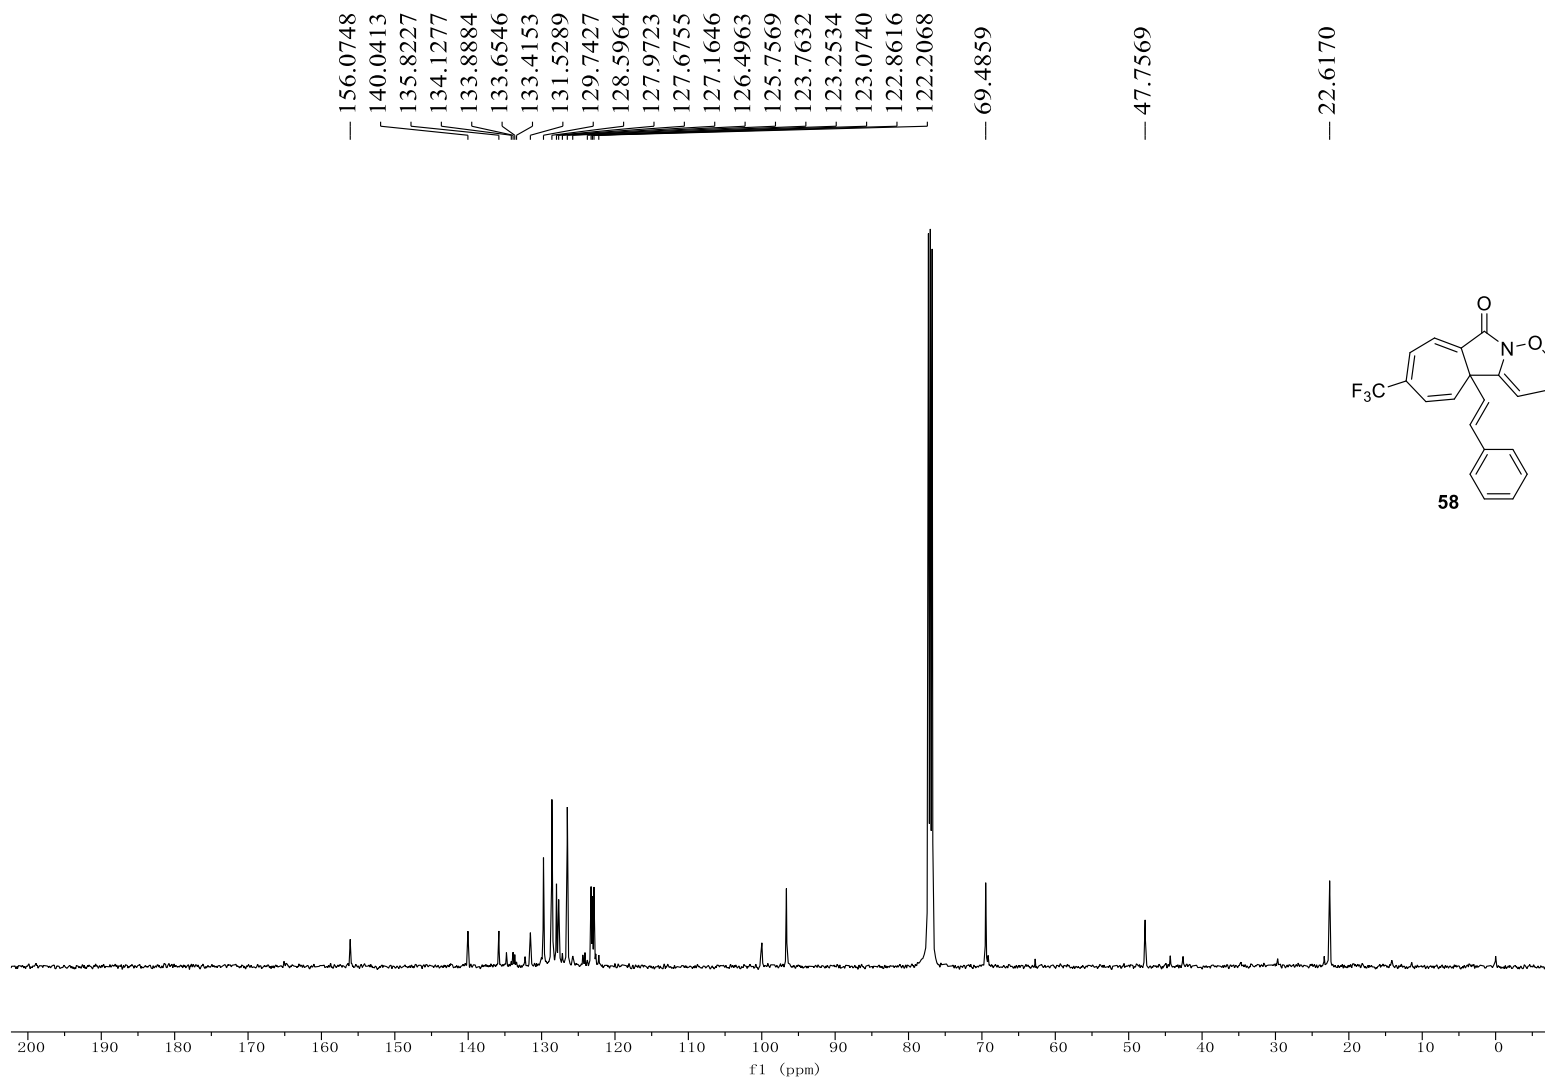



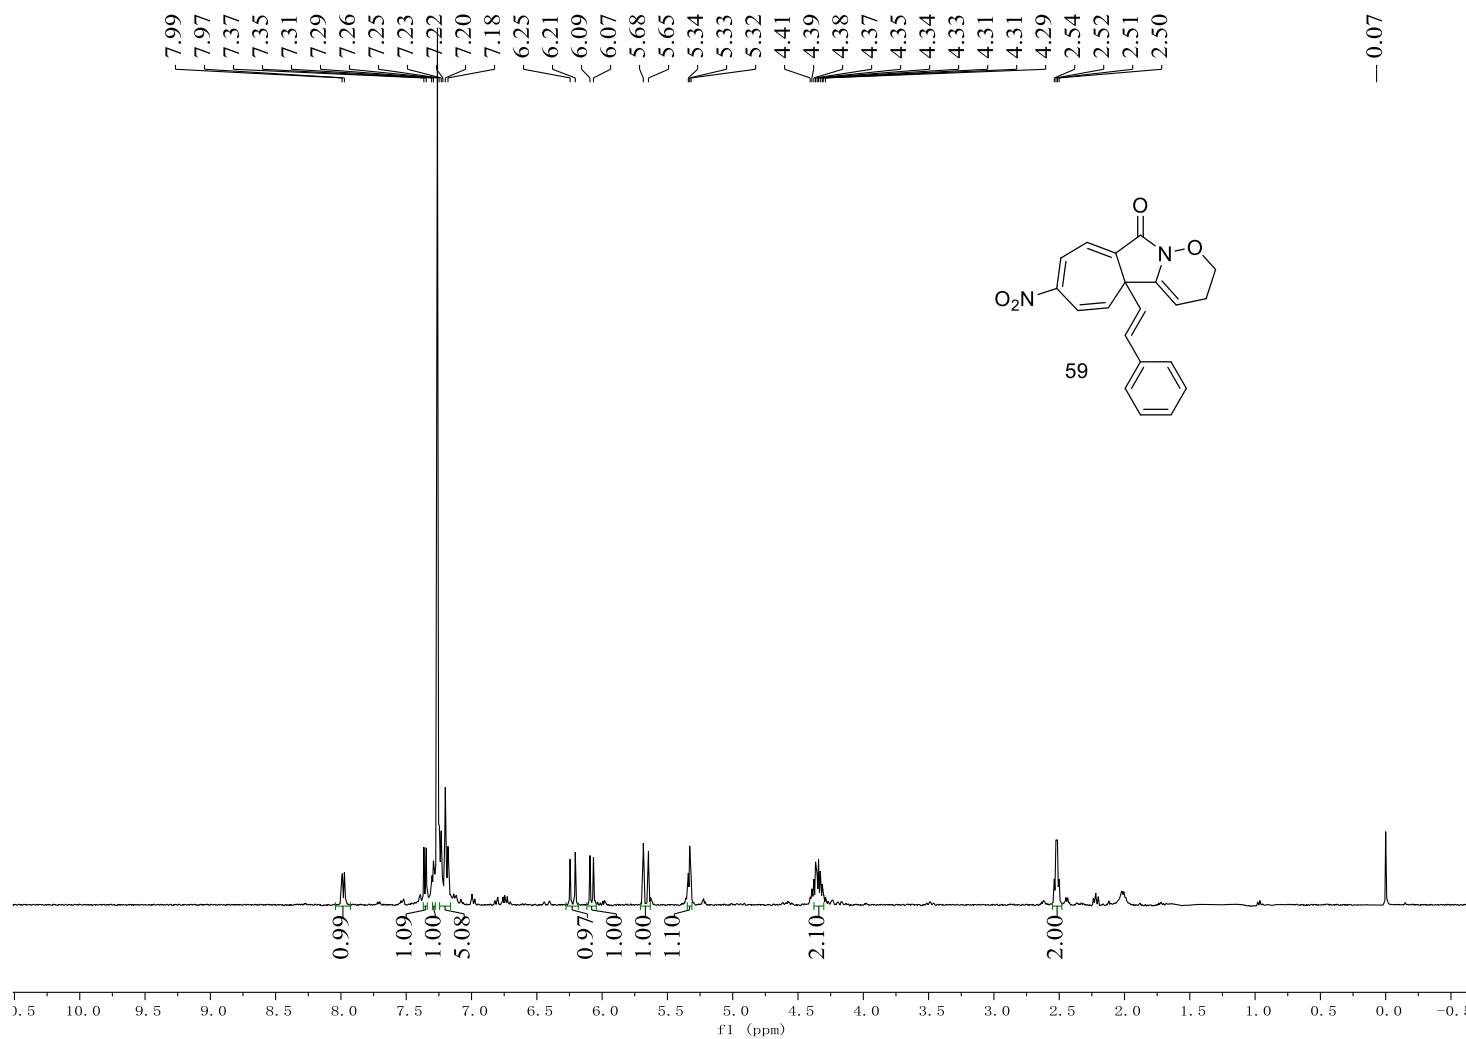

-0.07

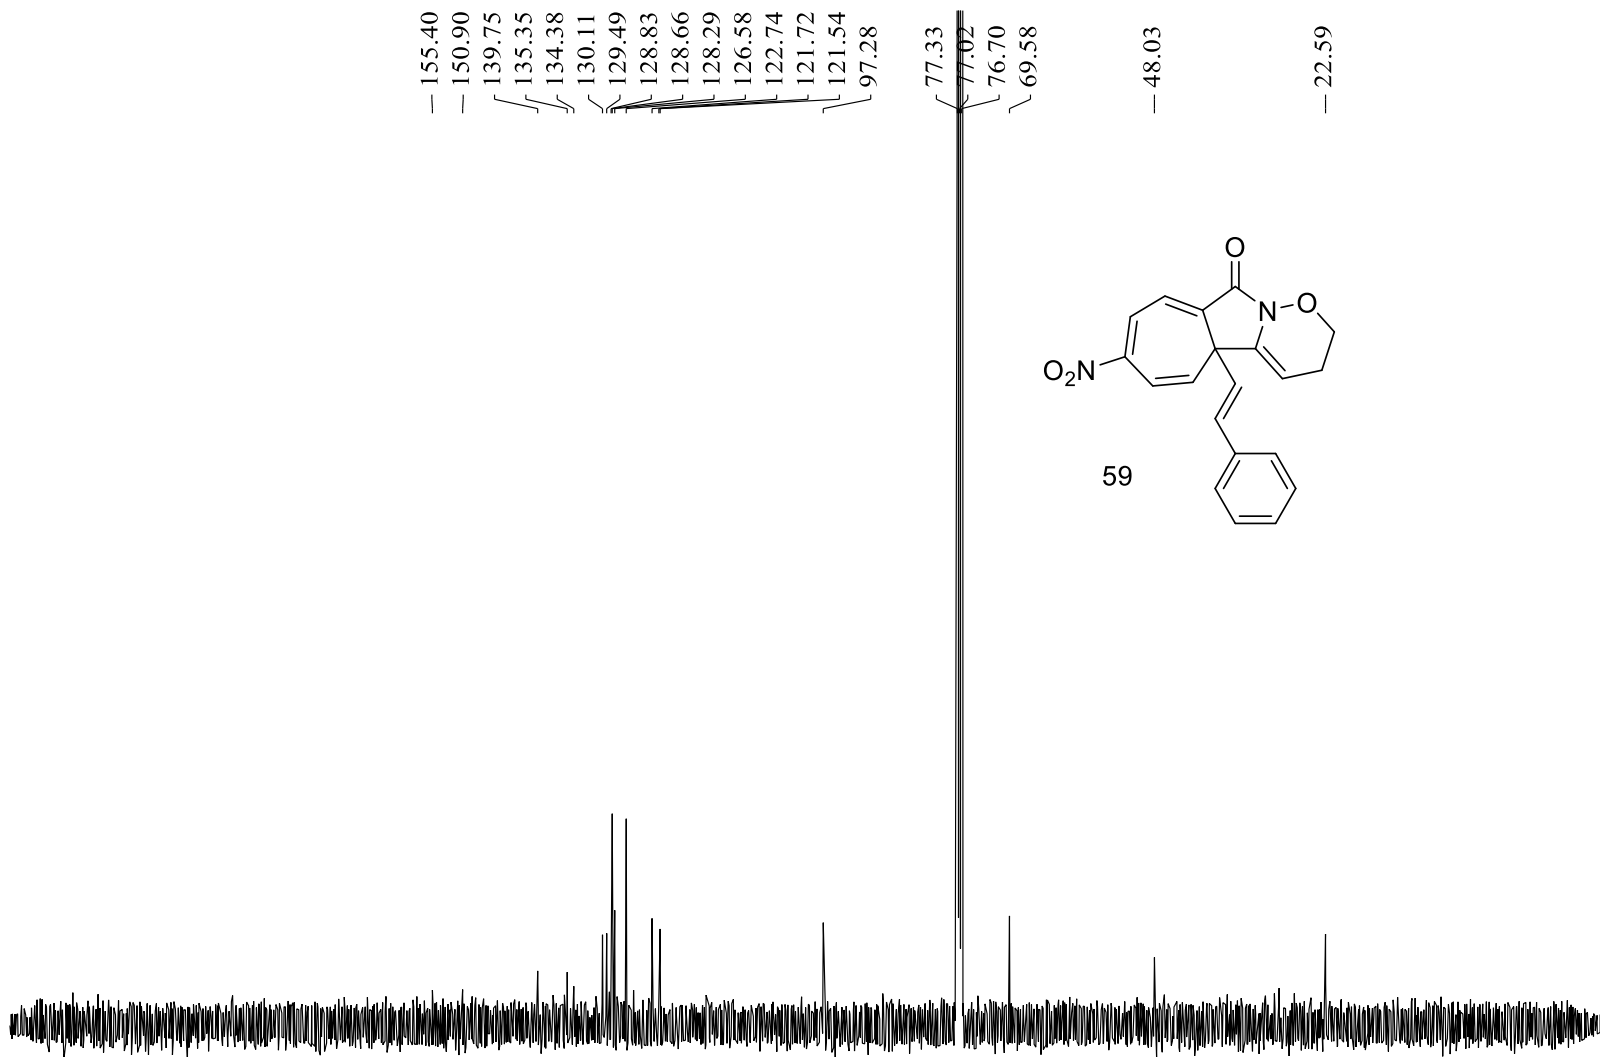

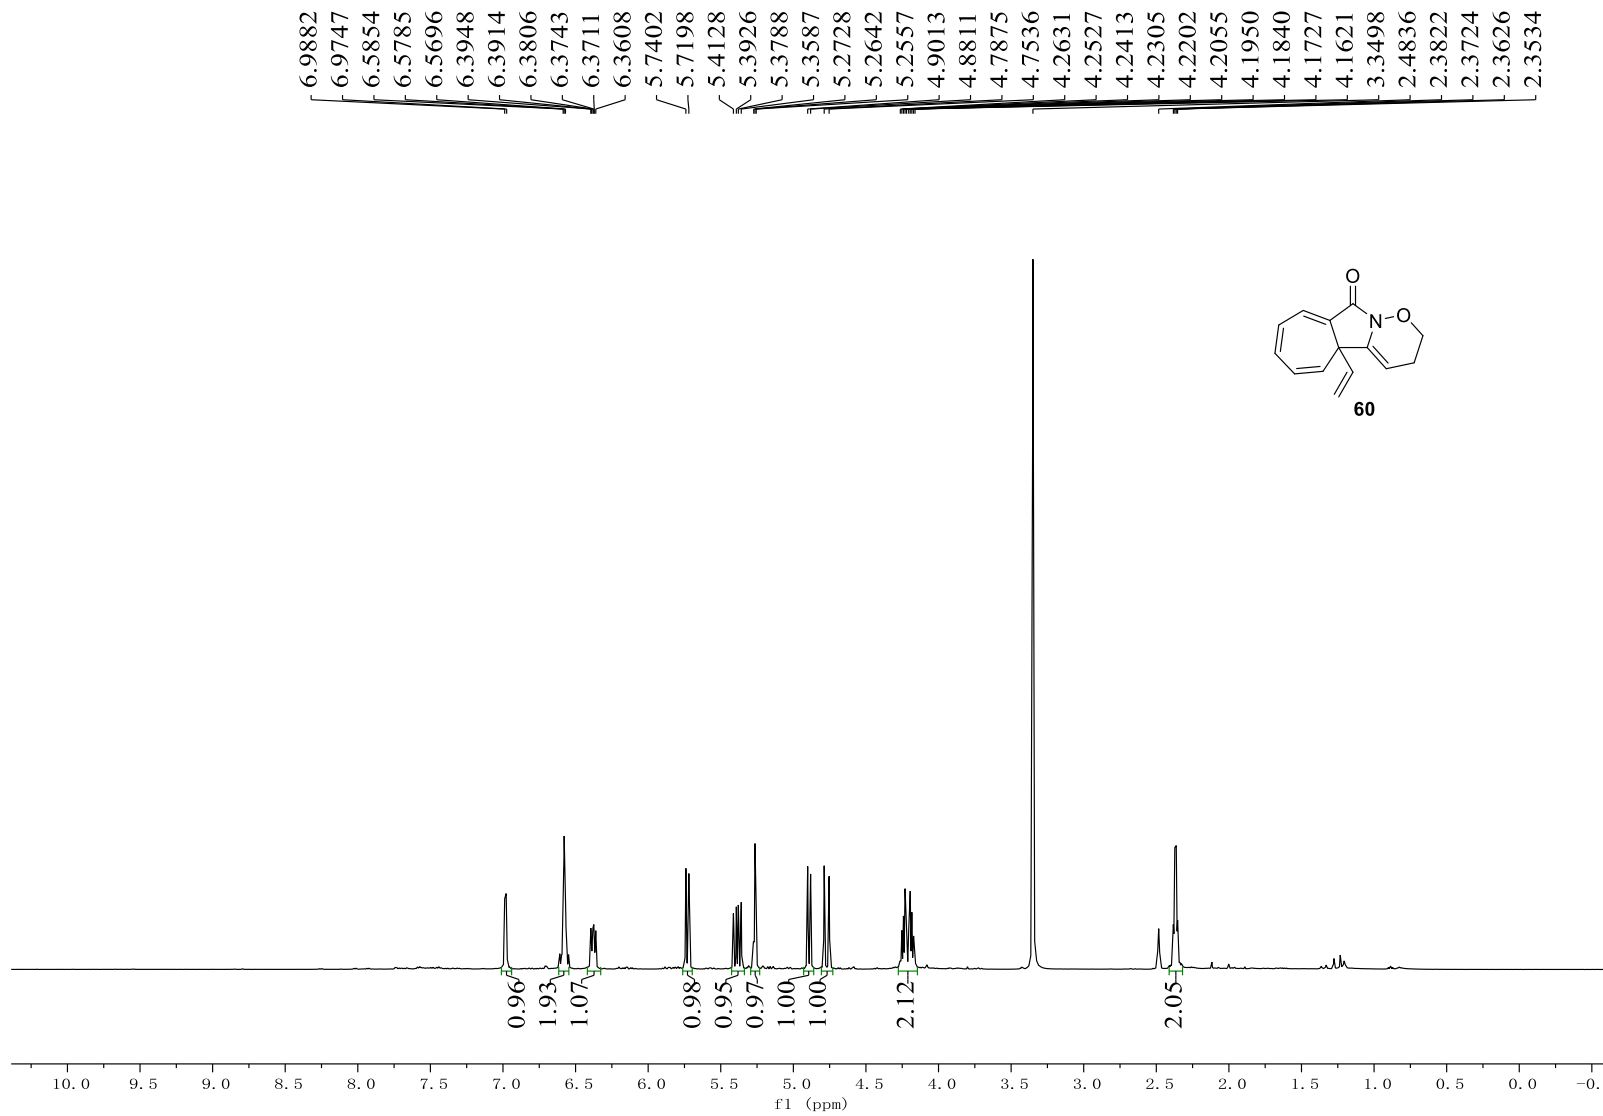

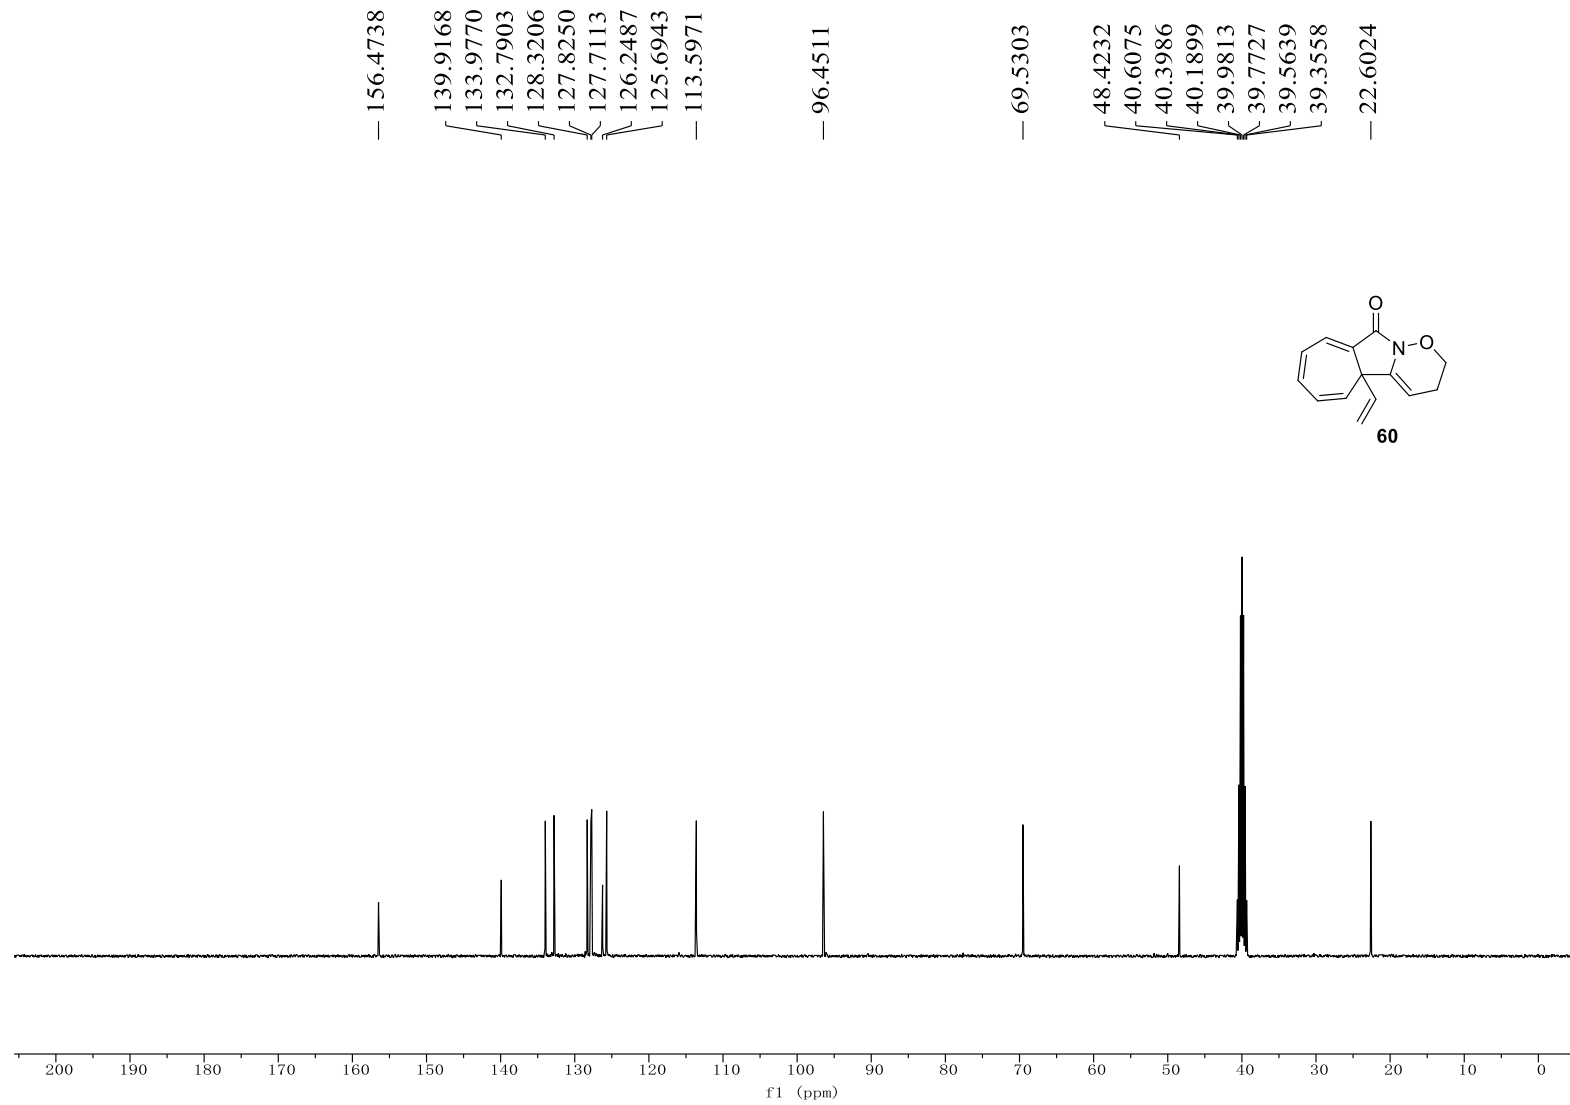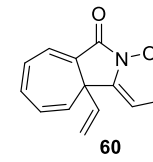

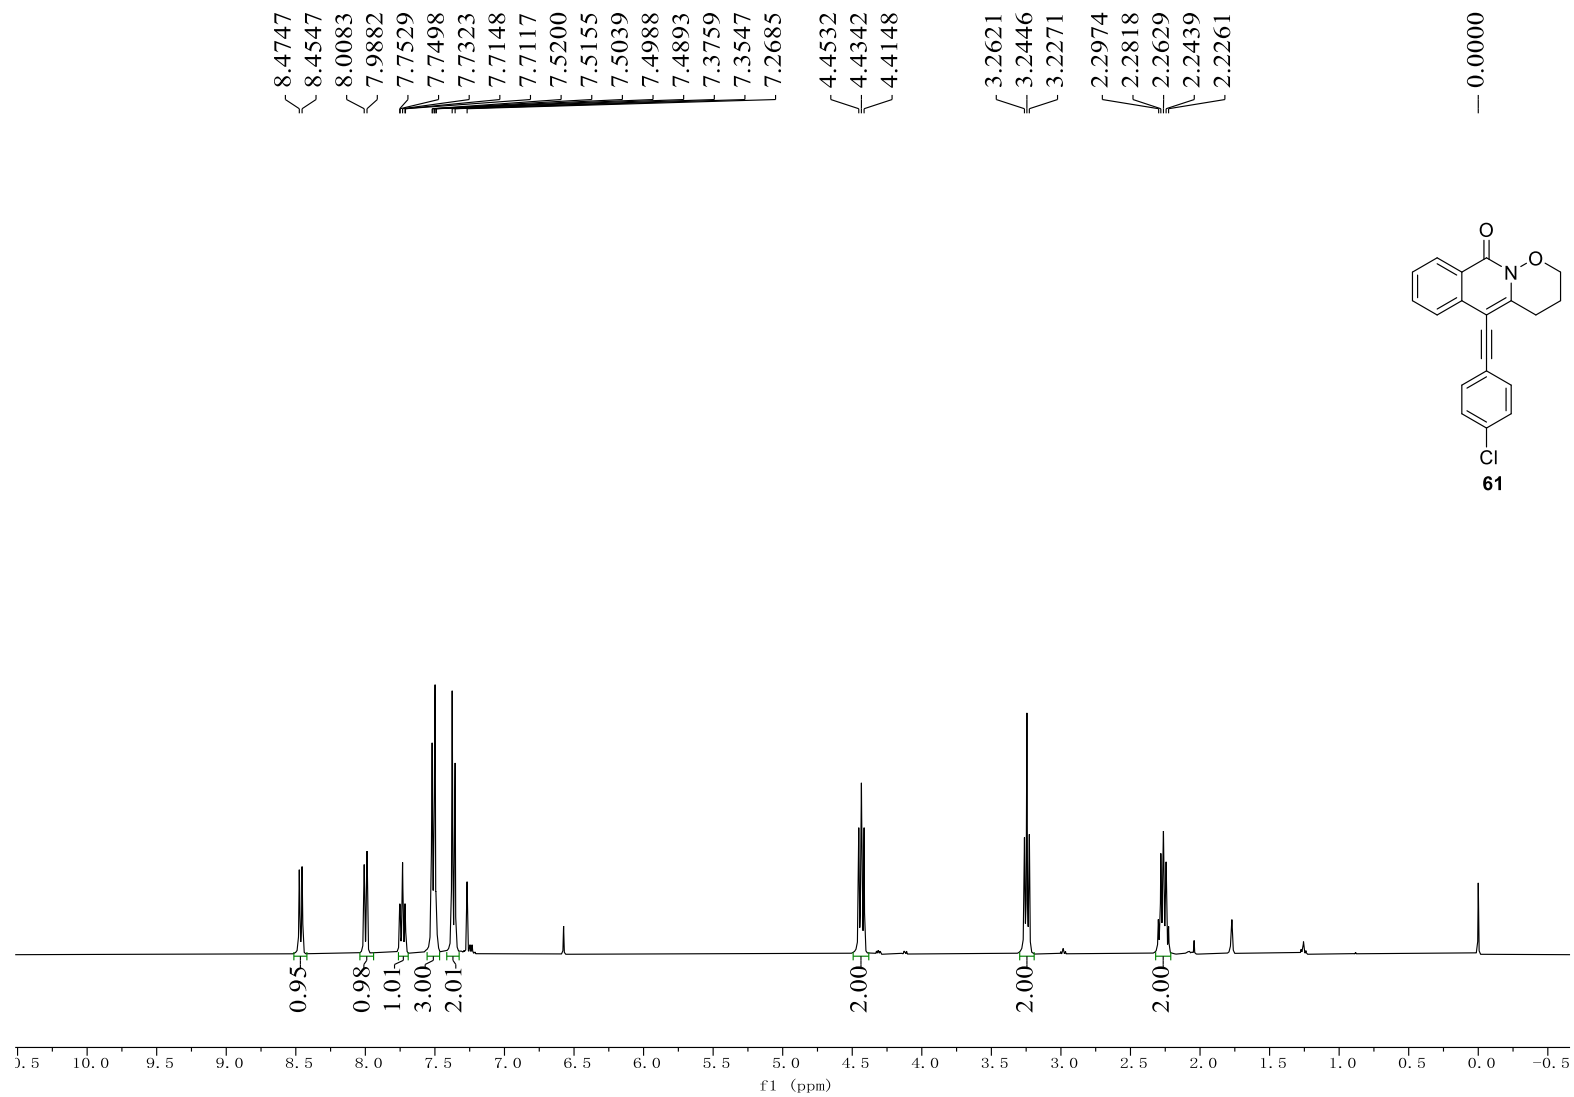

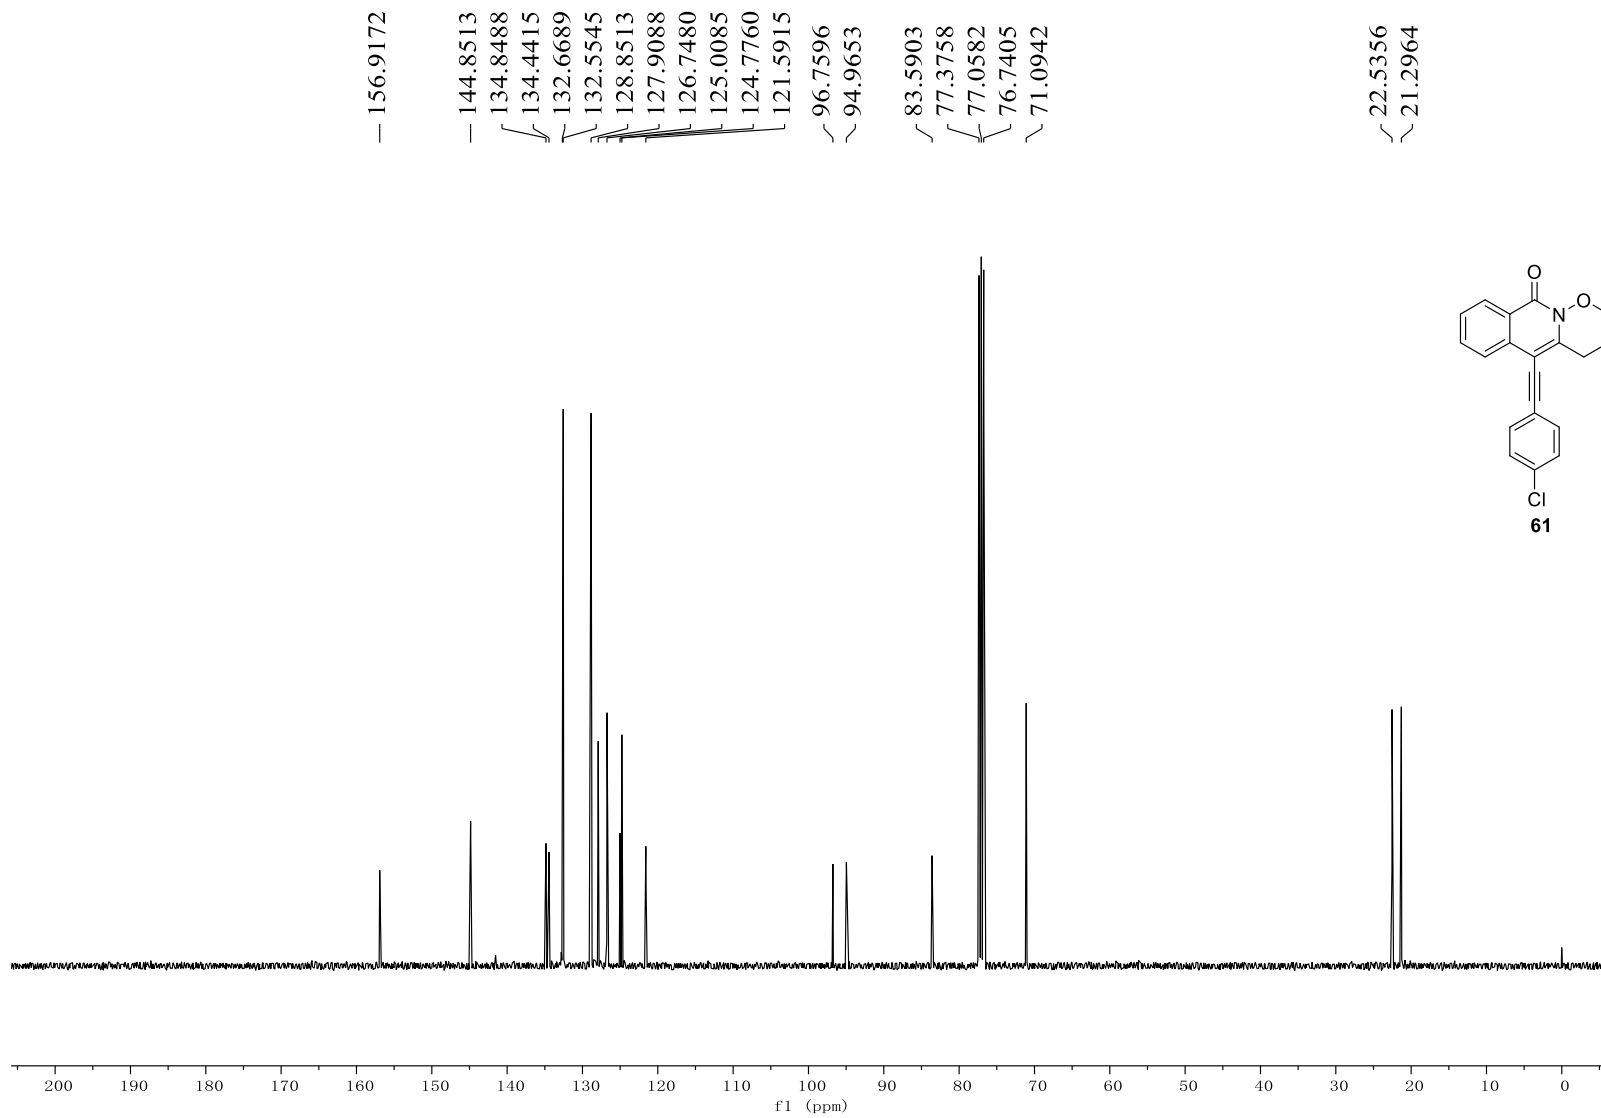

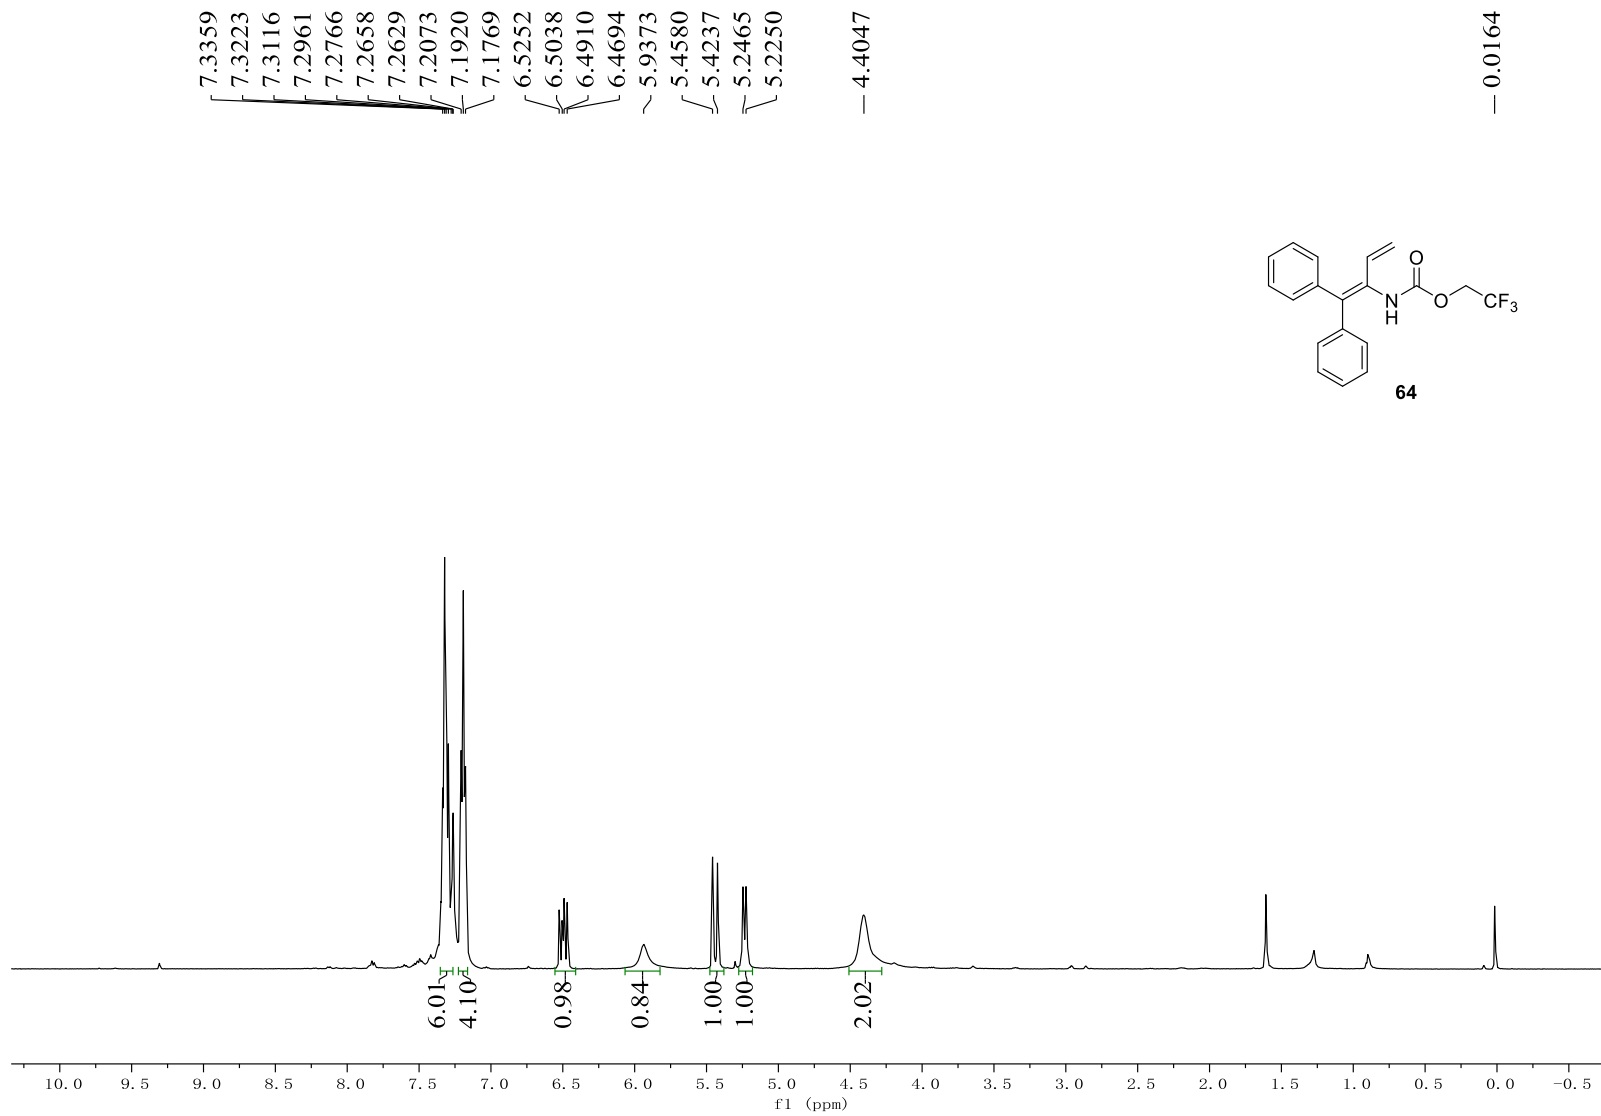

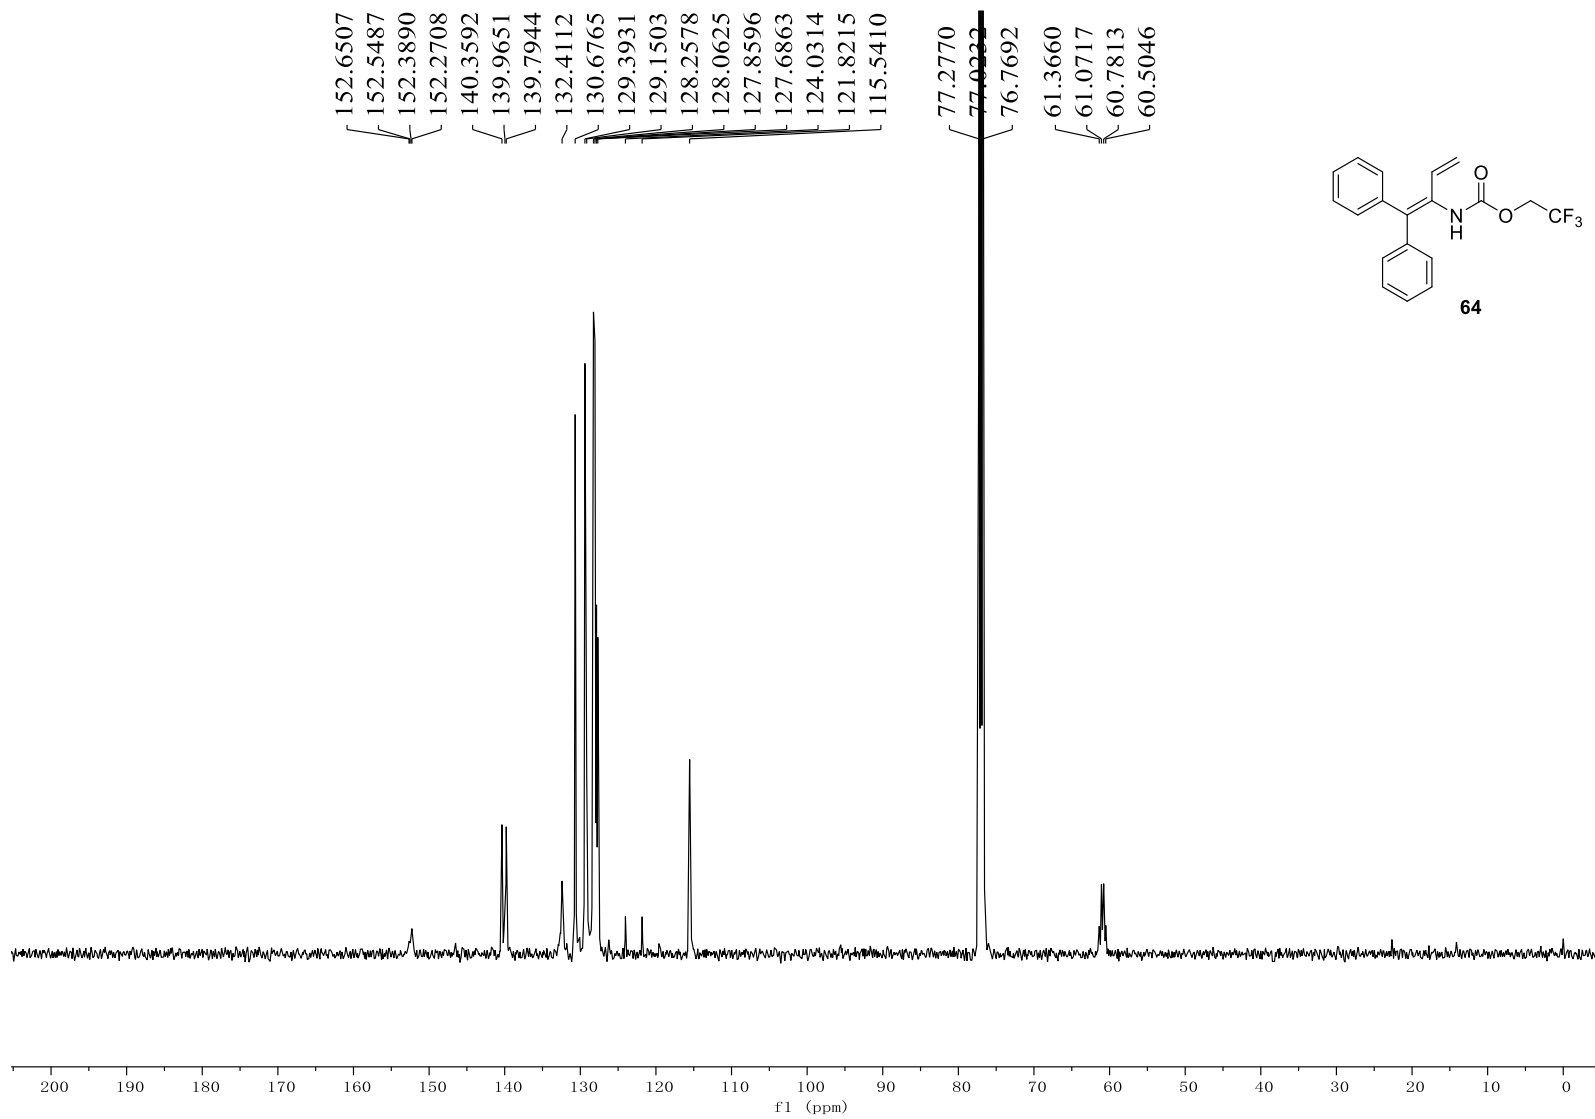



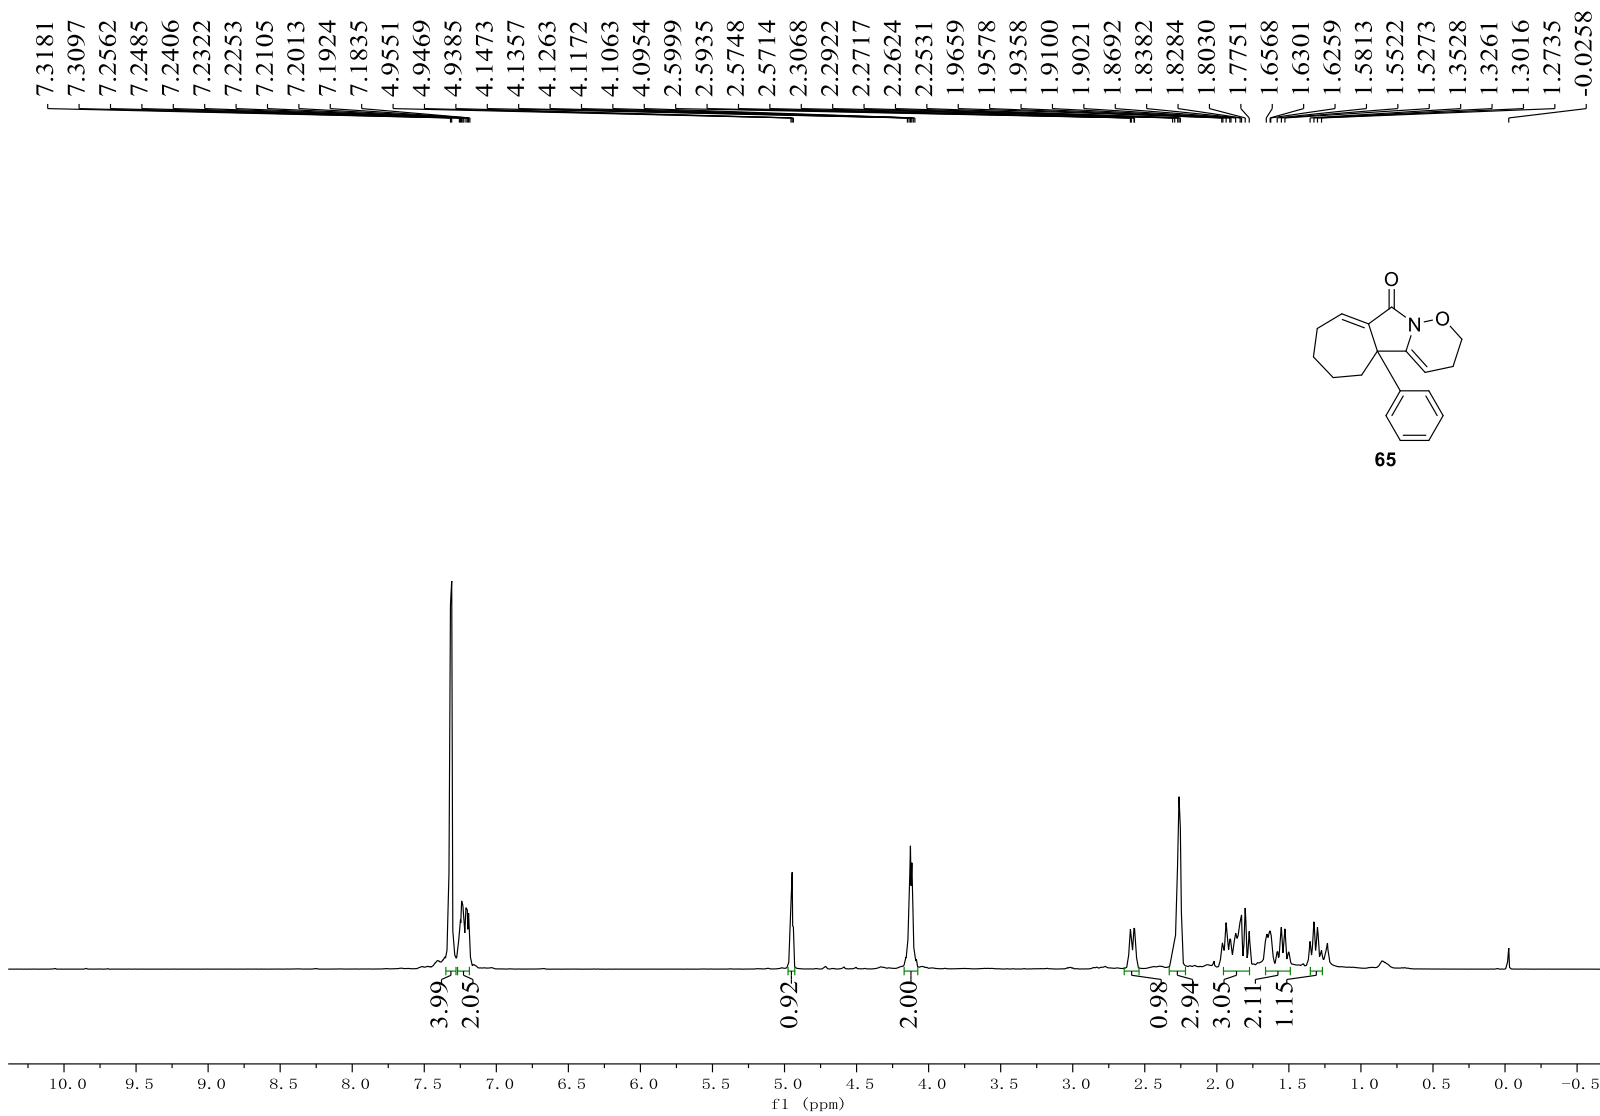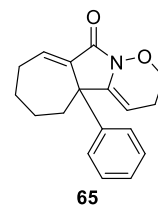

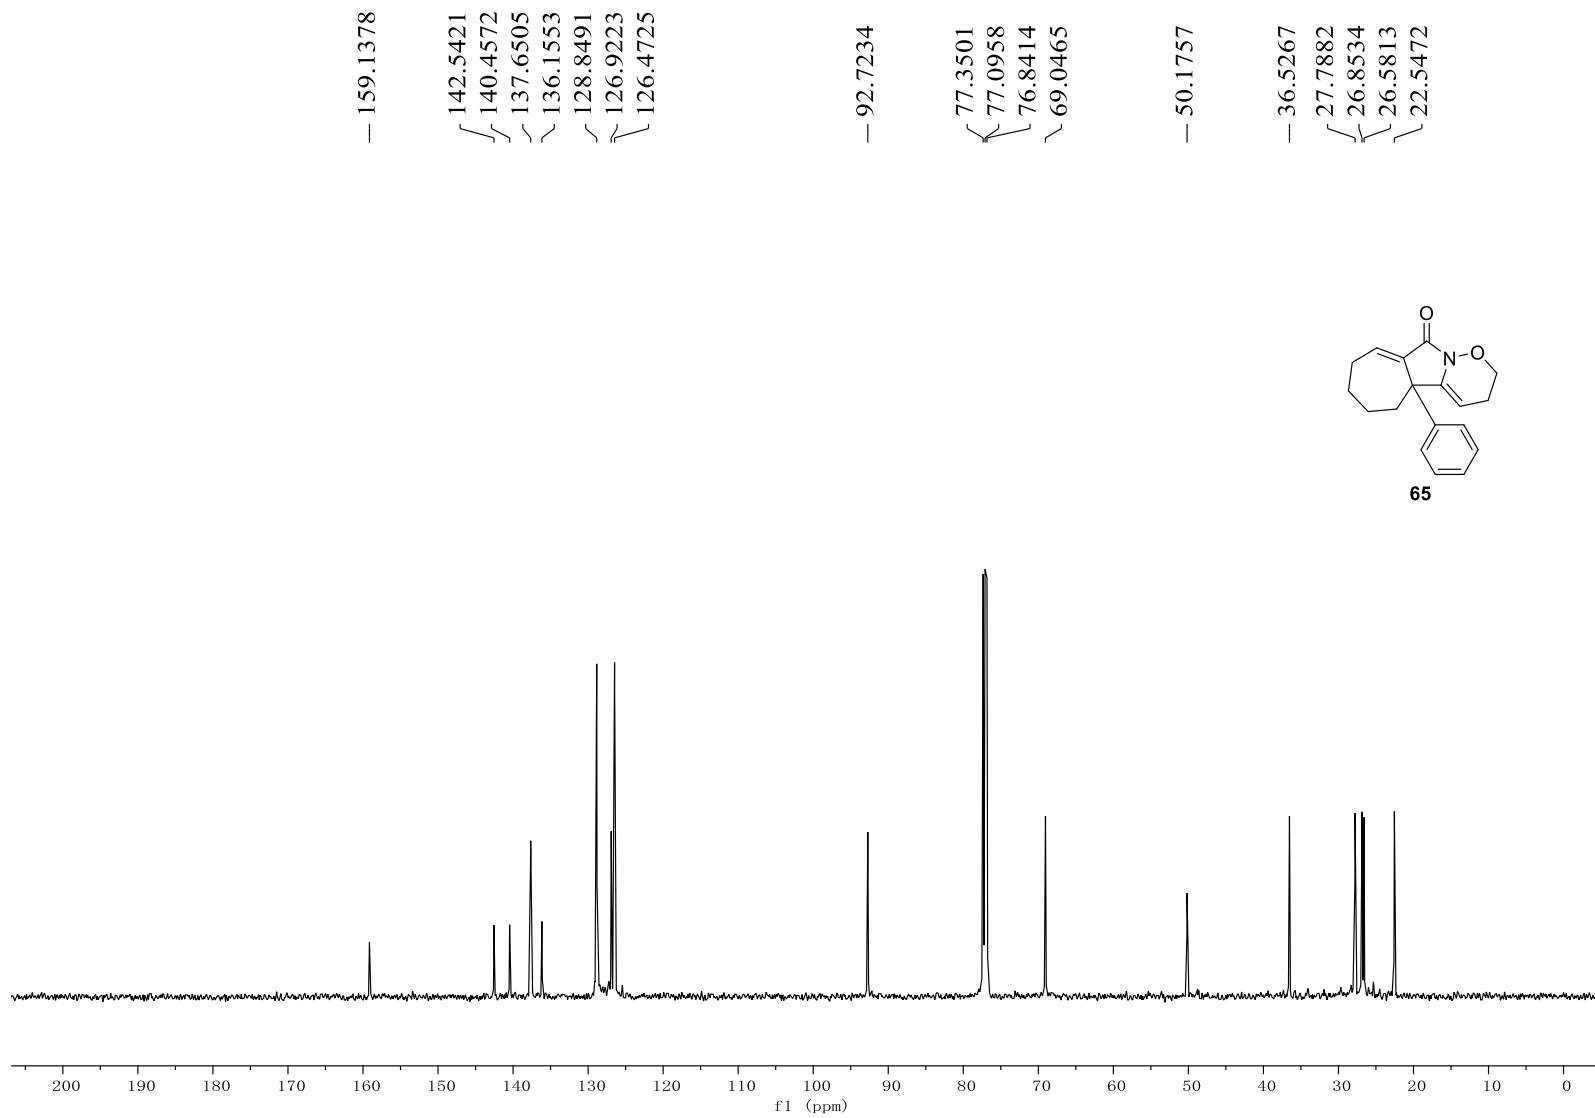

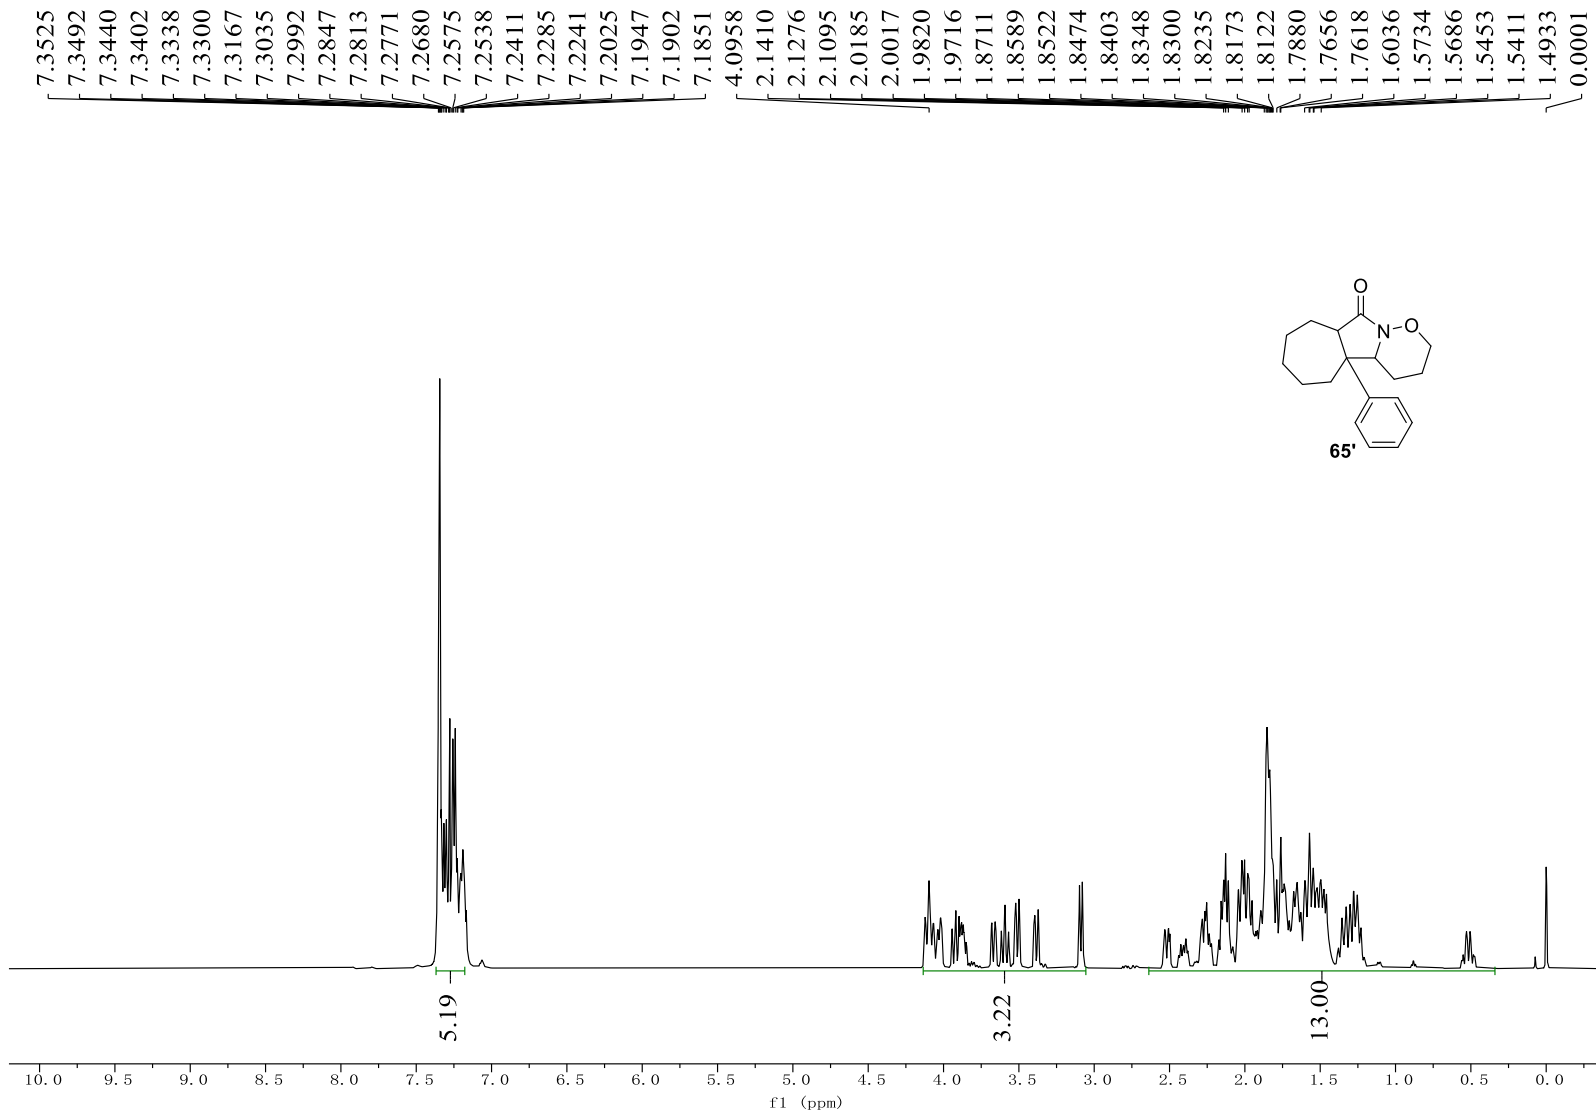

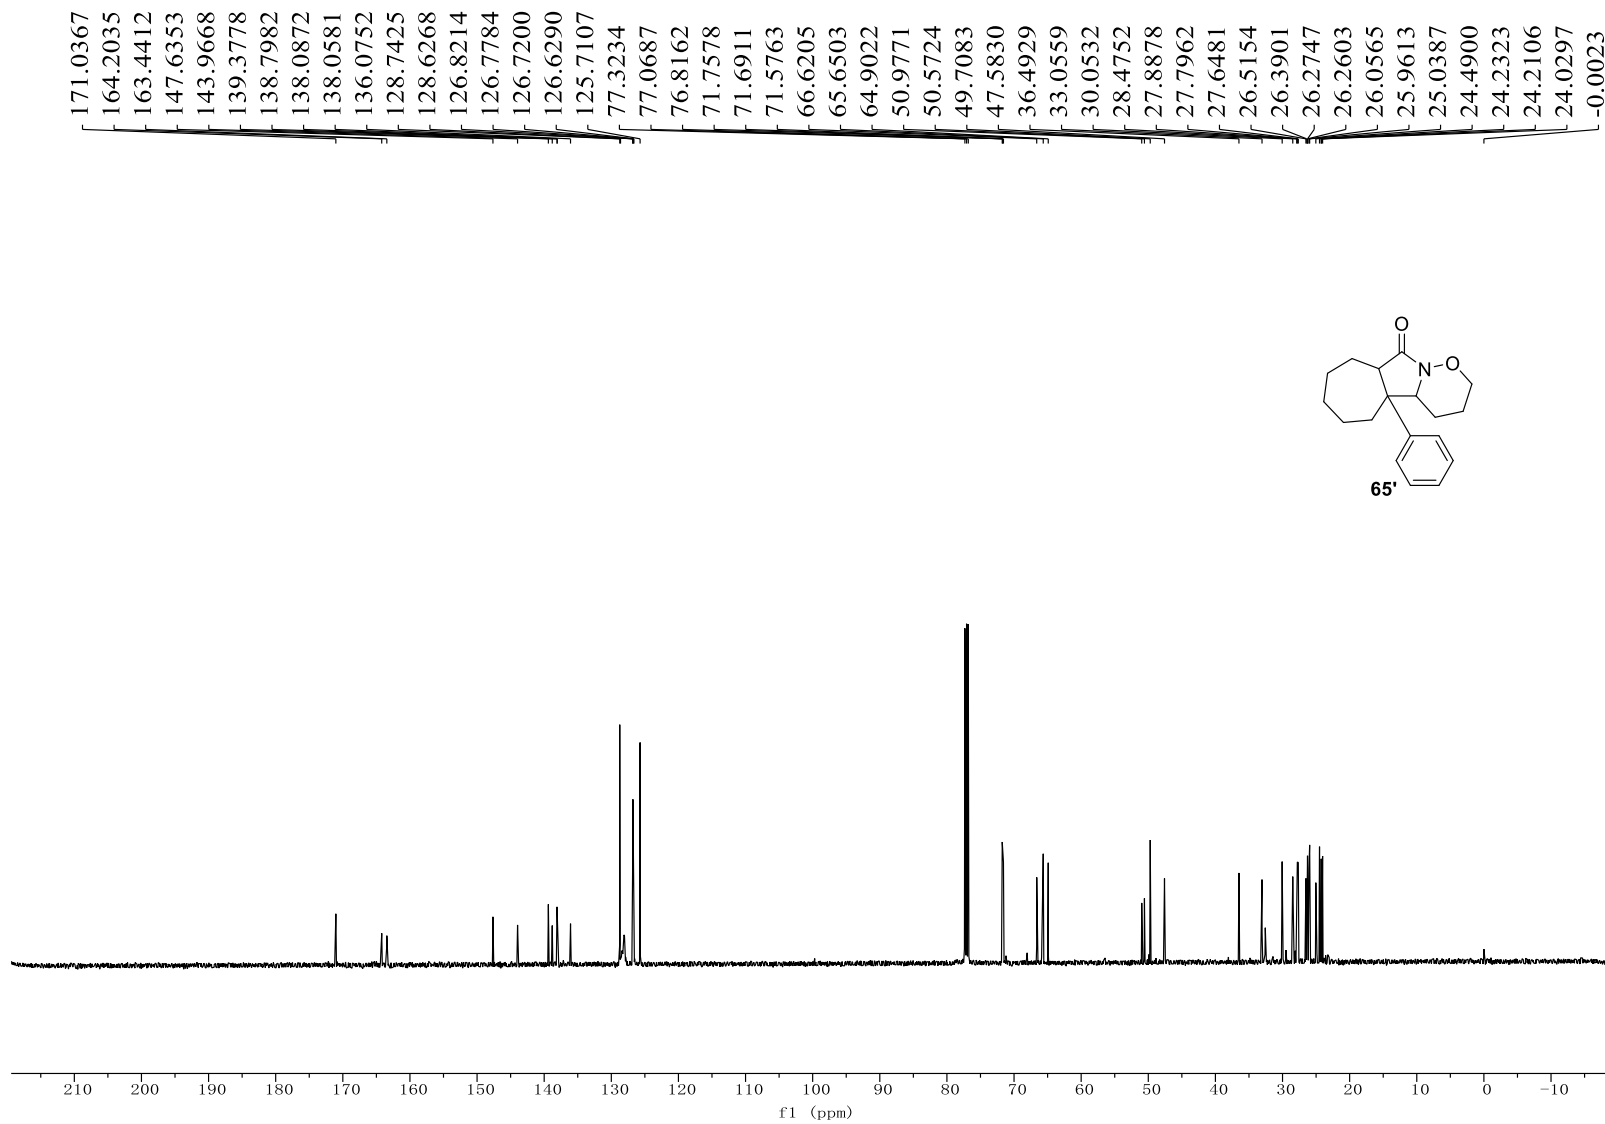

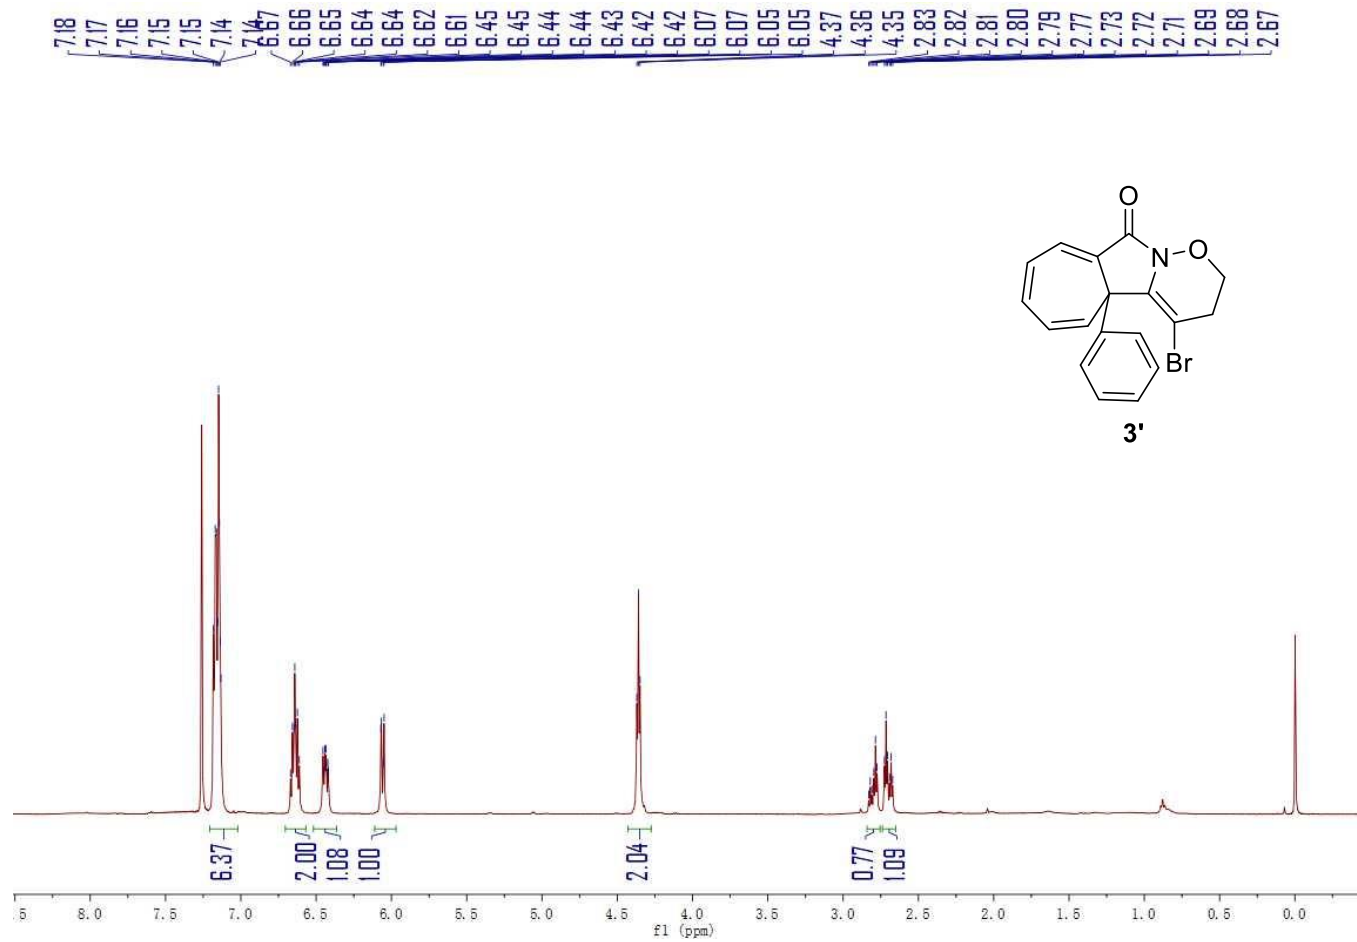

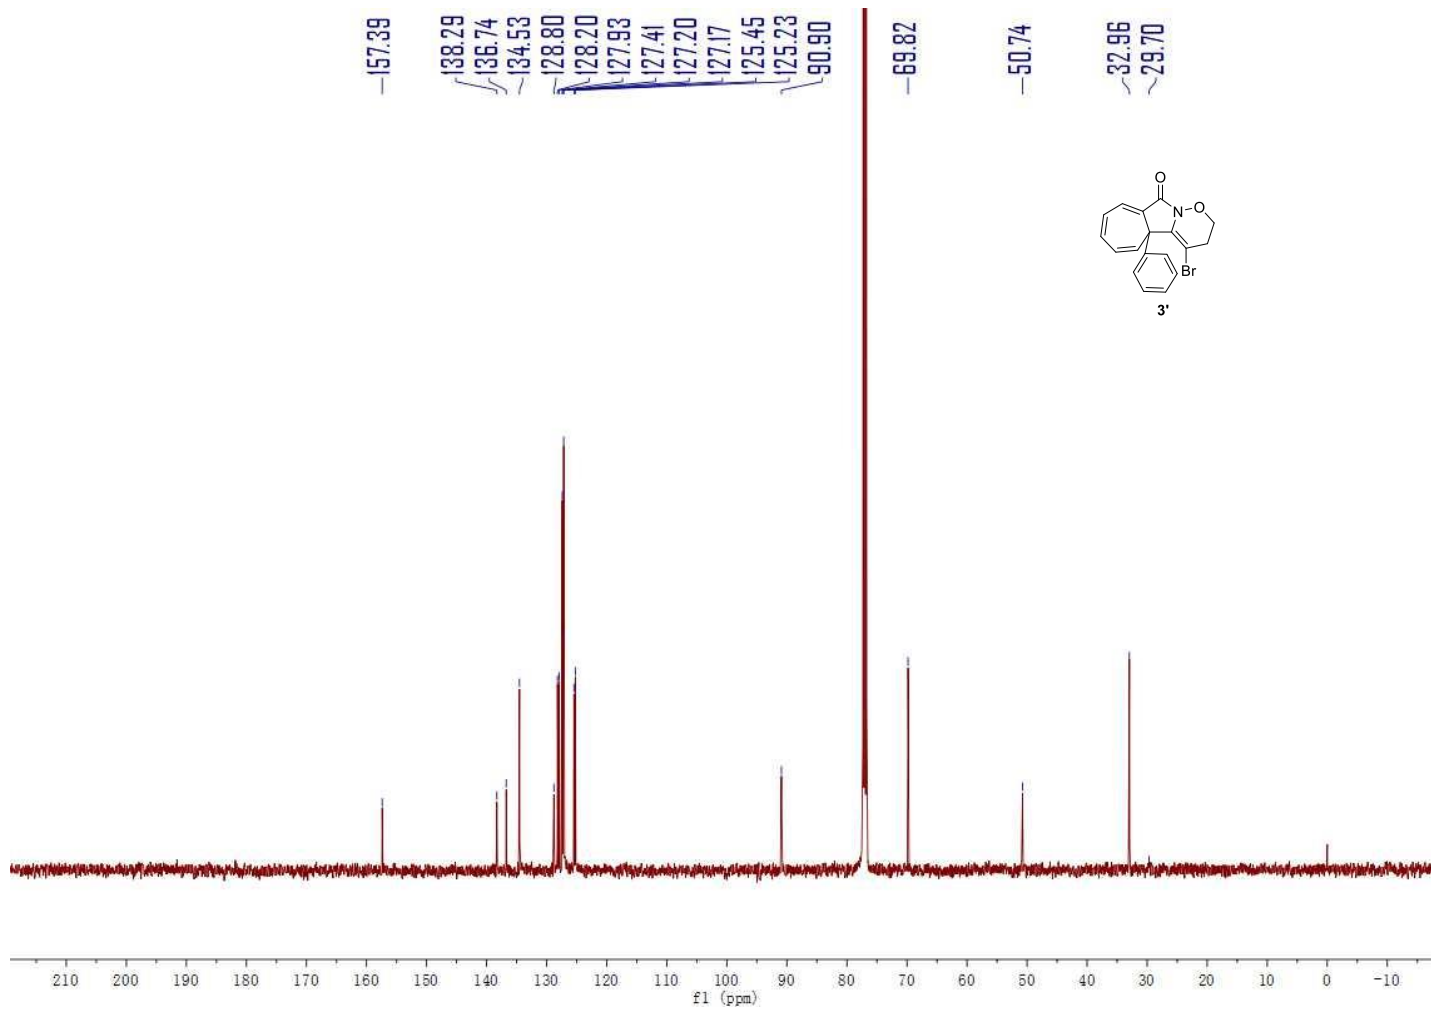

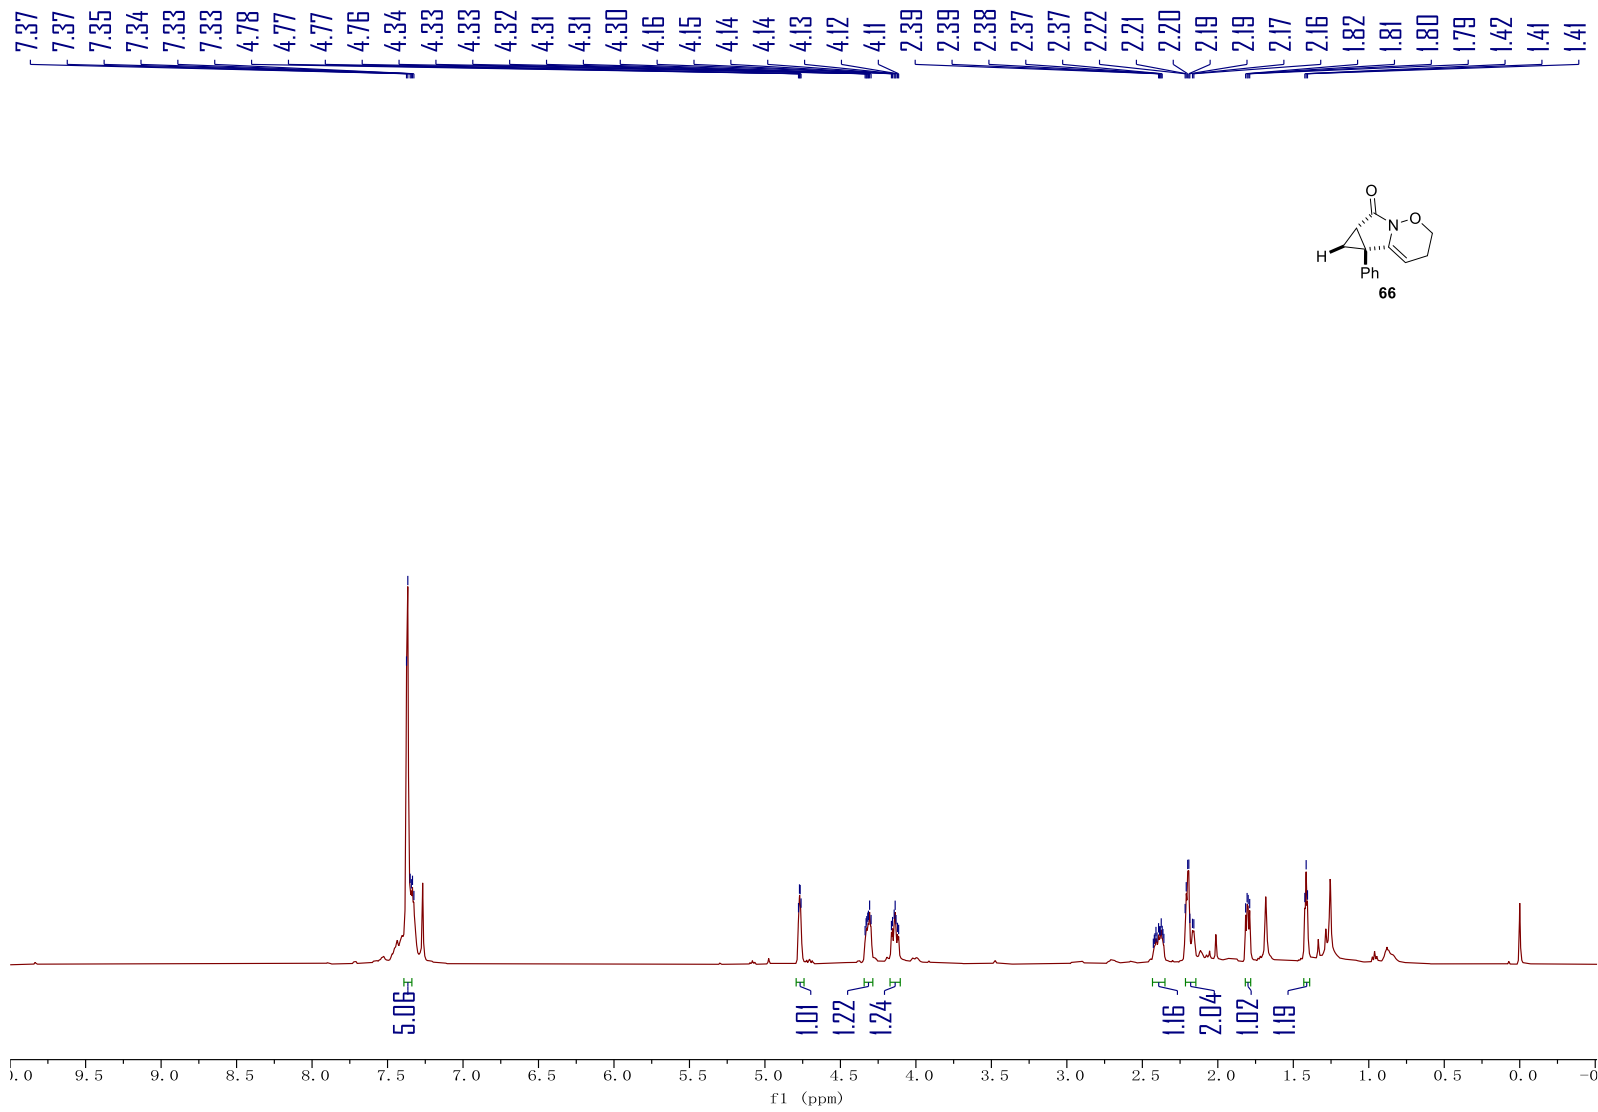

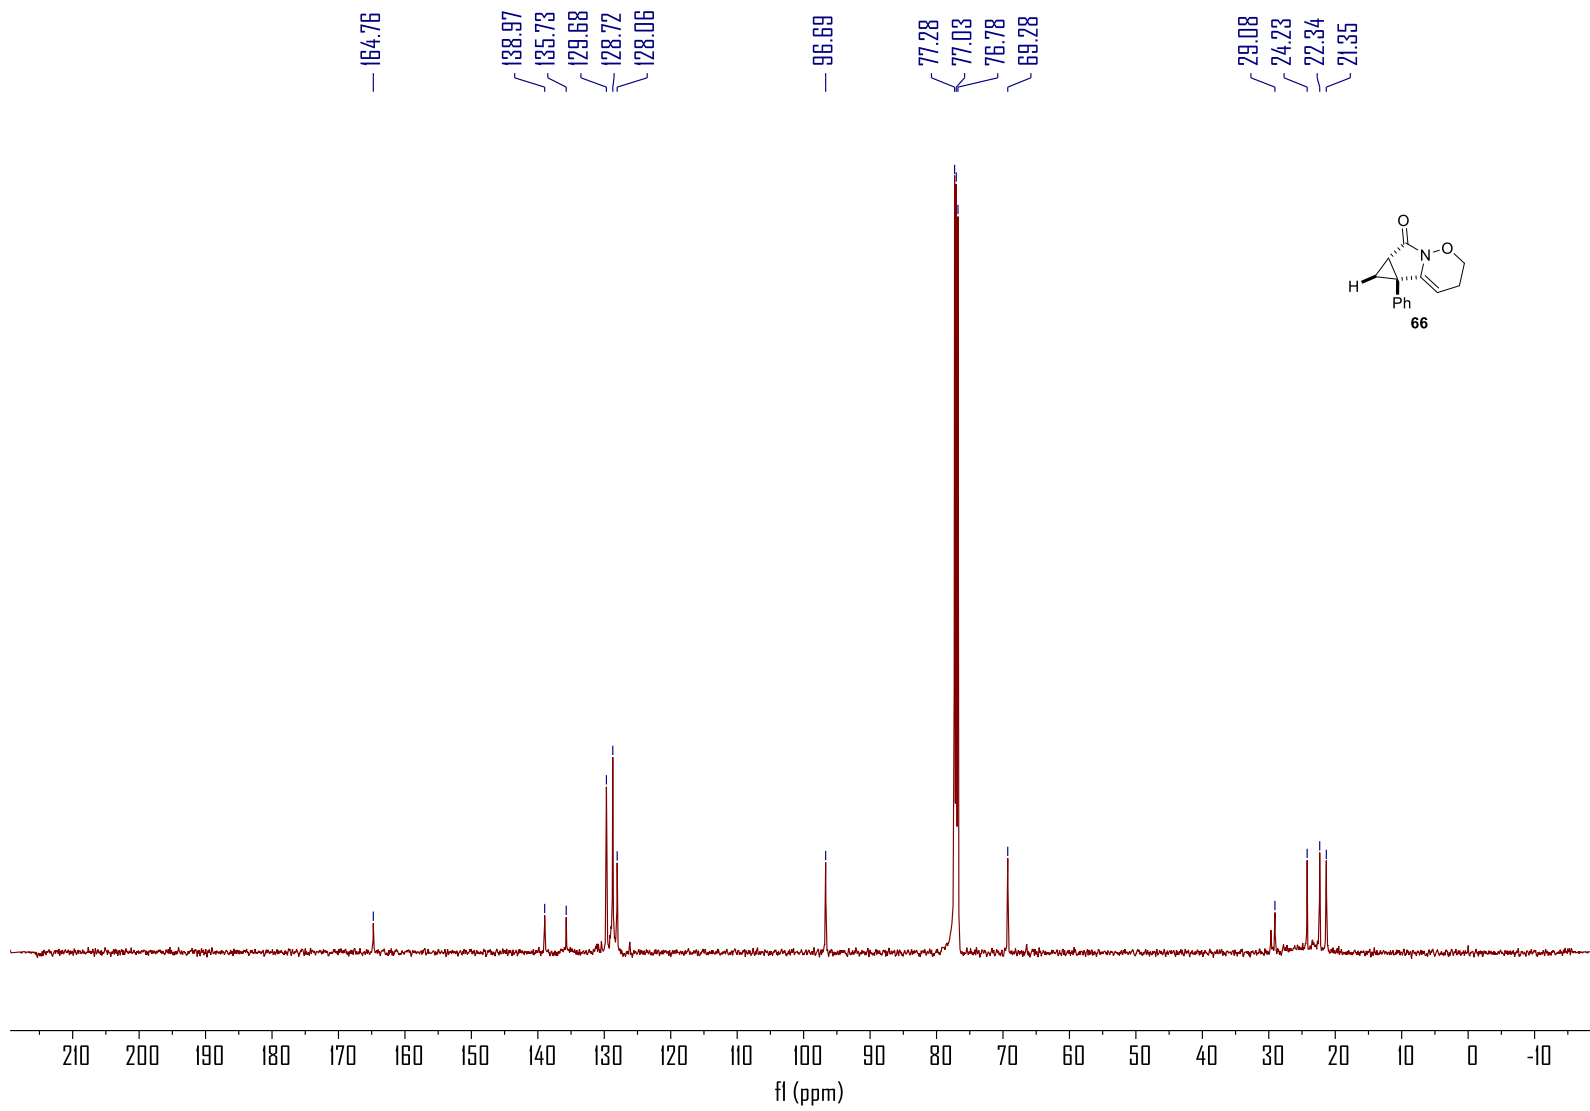



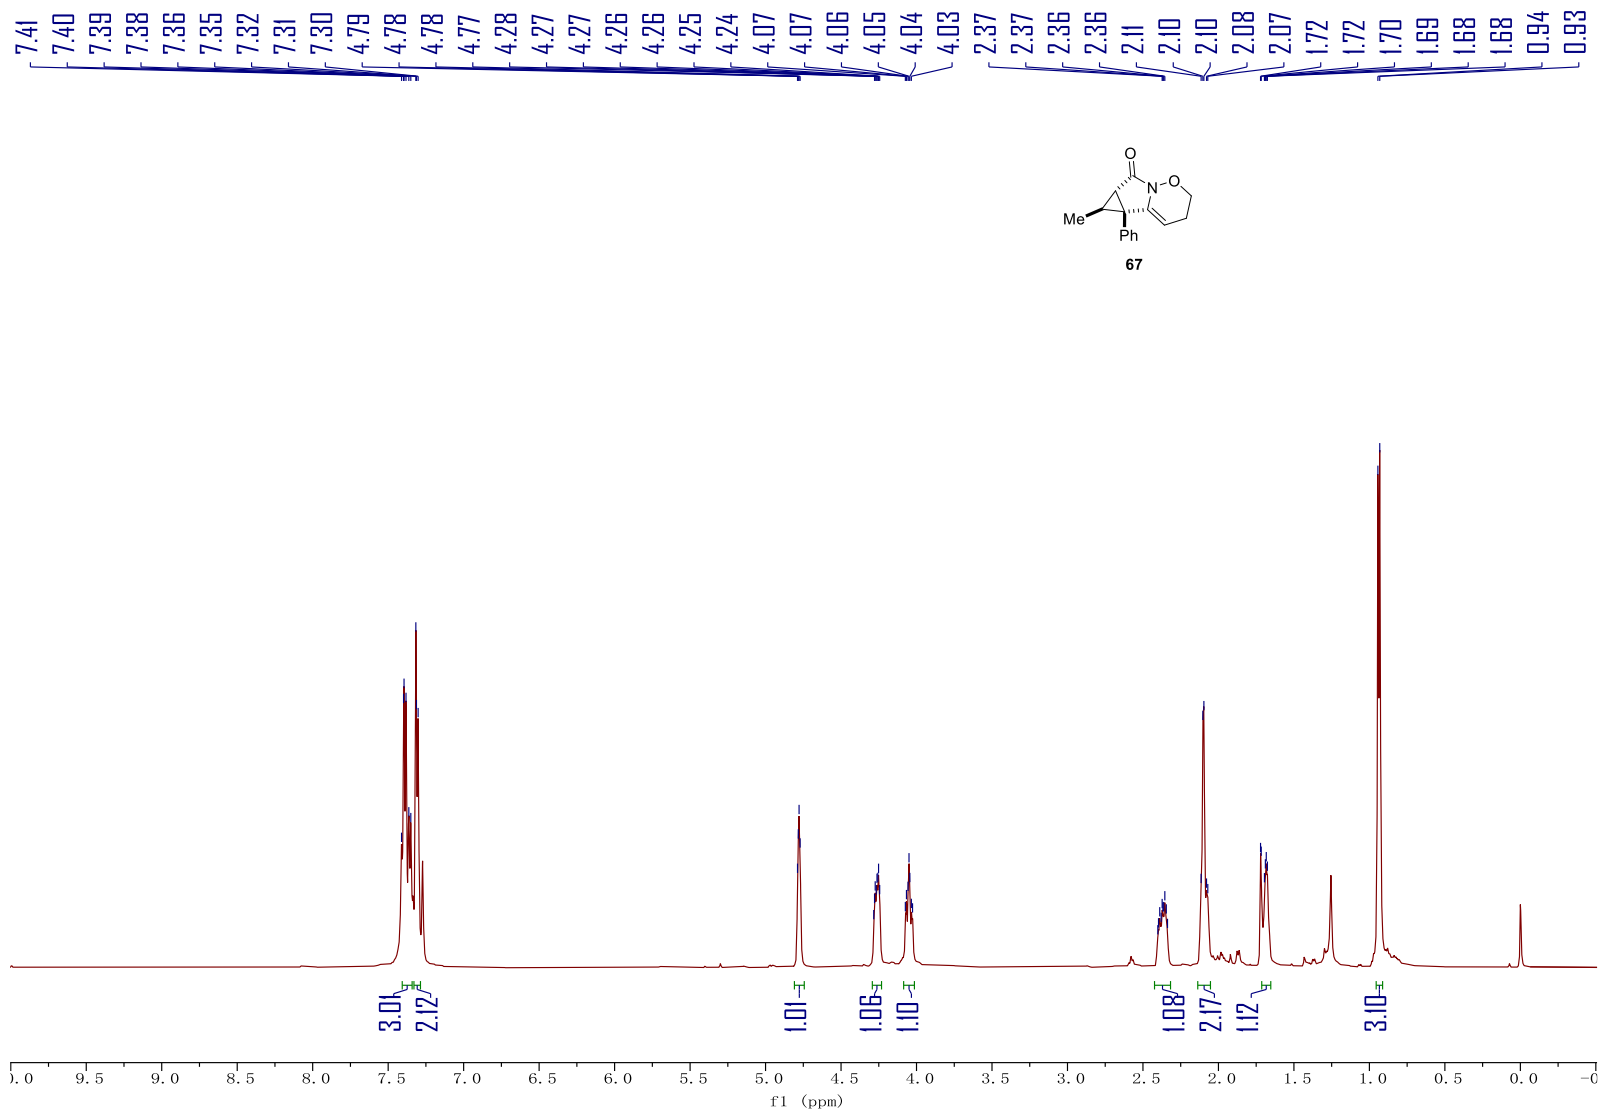

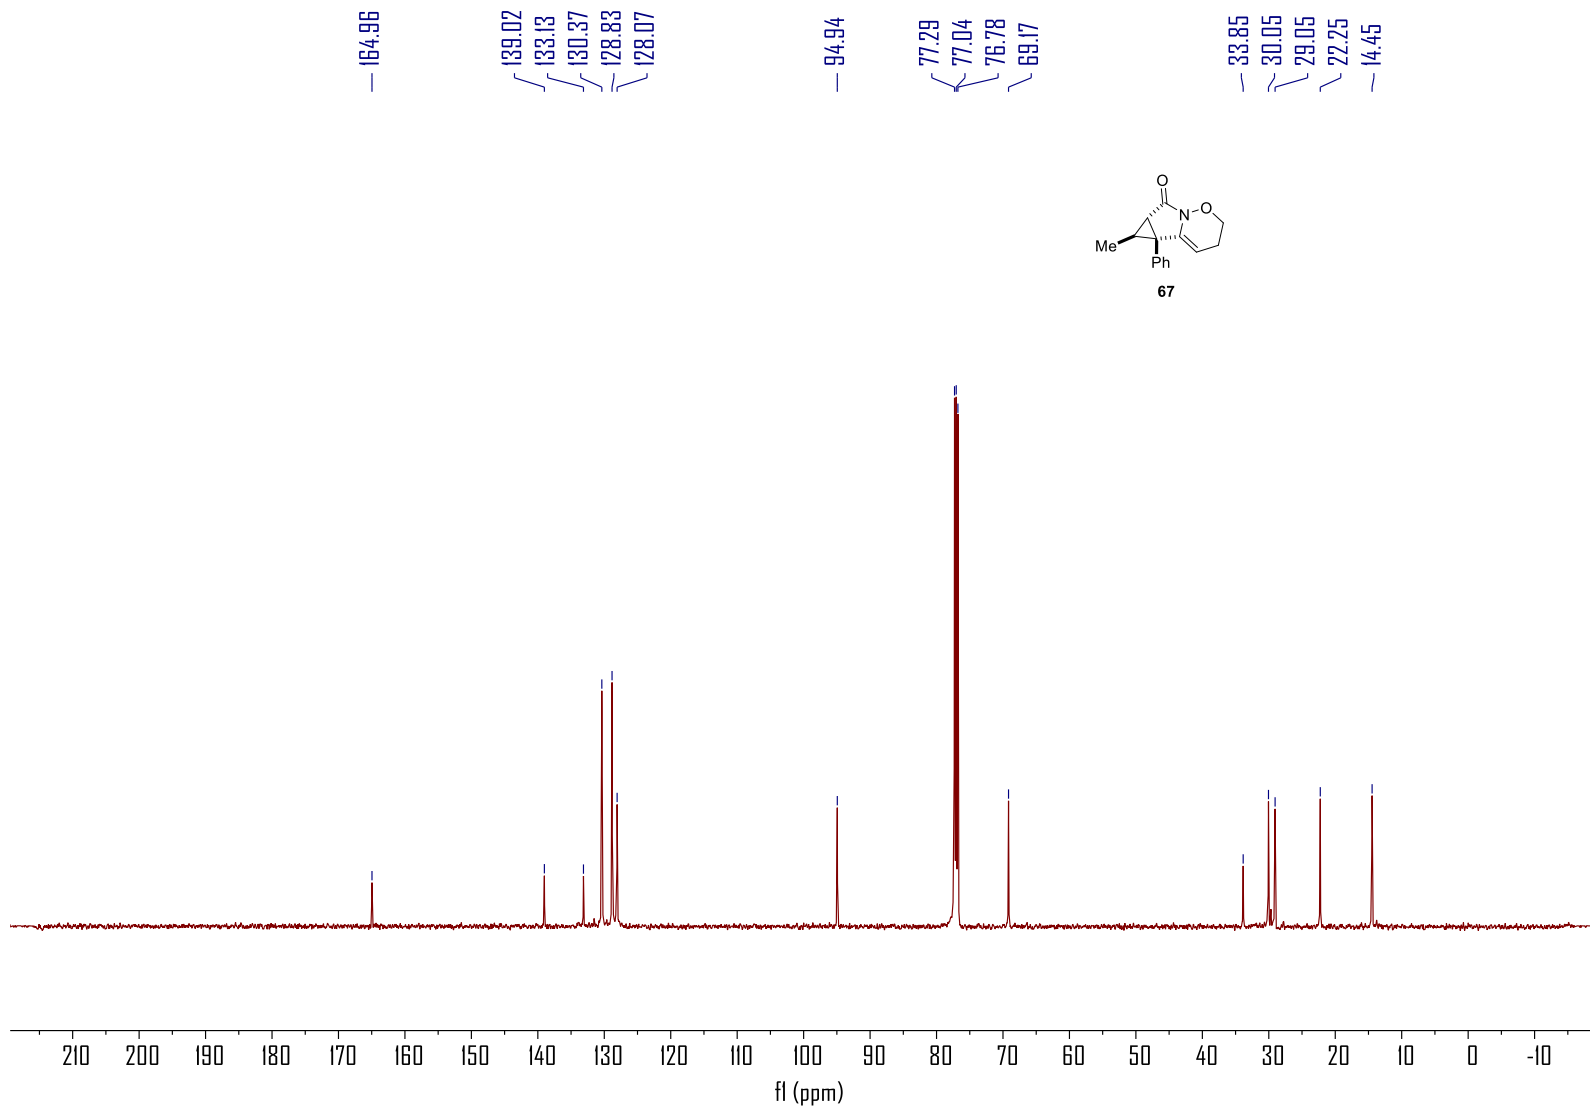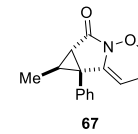

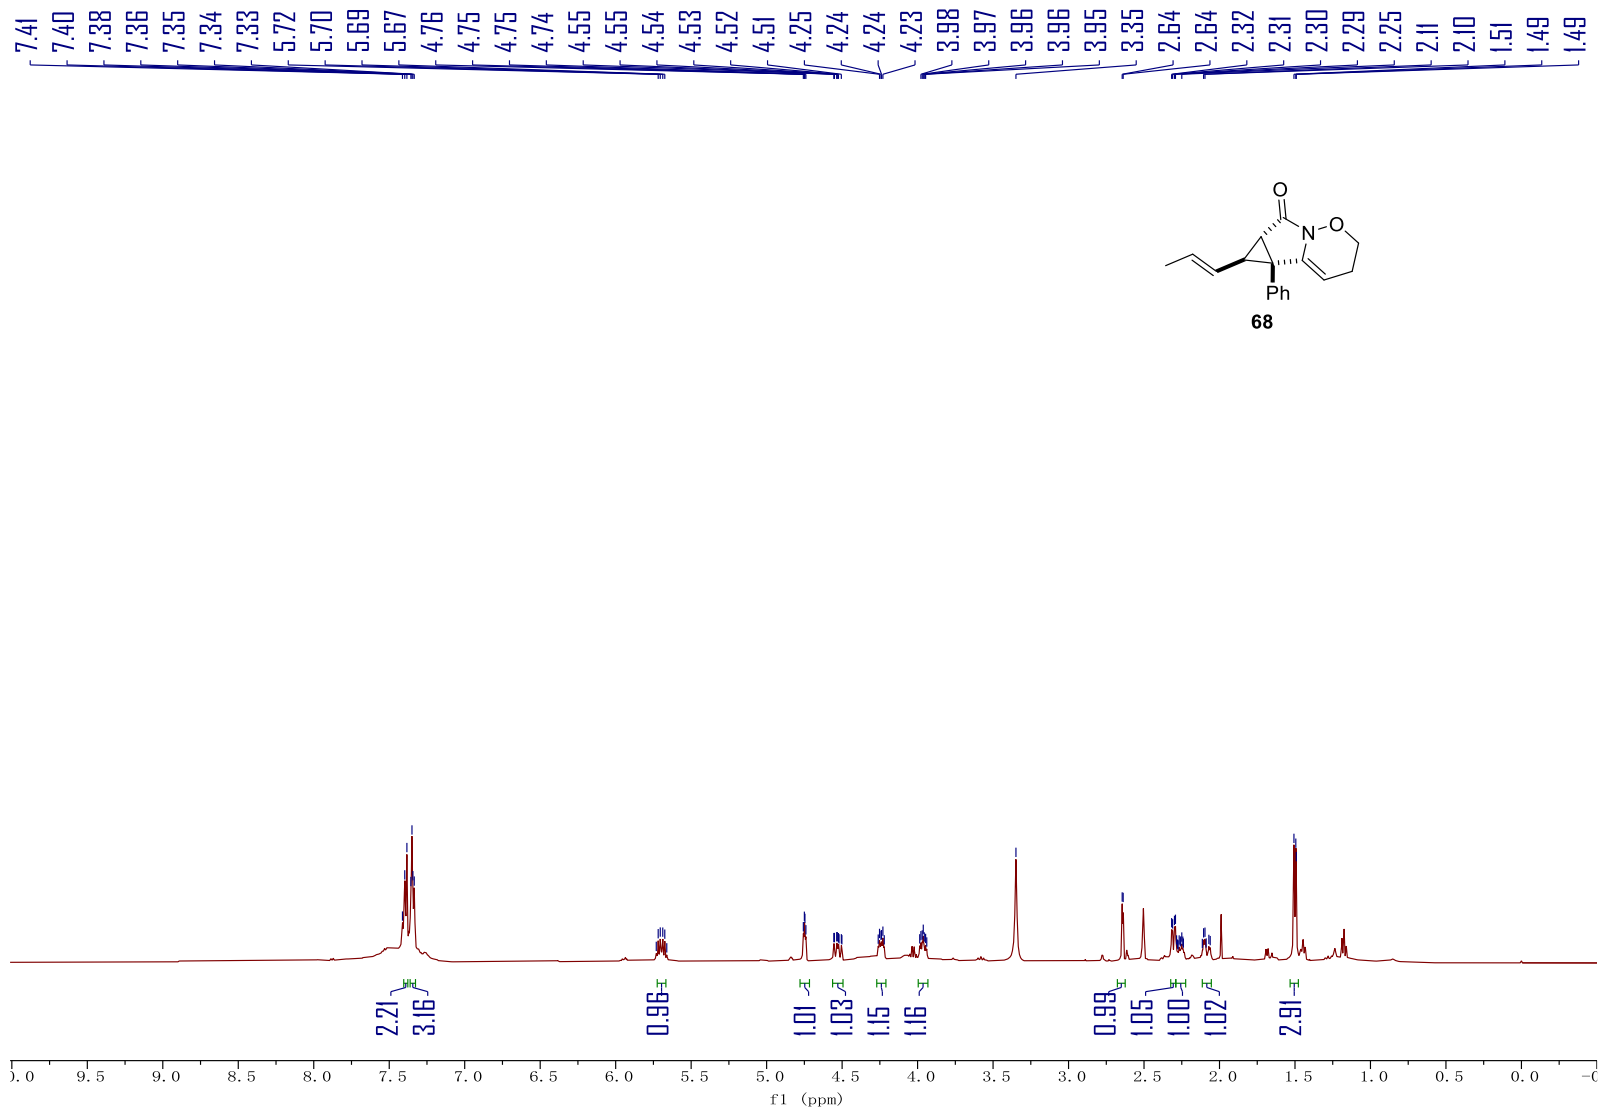

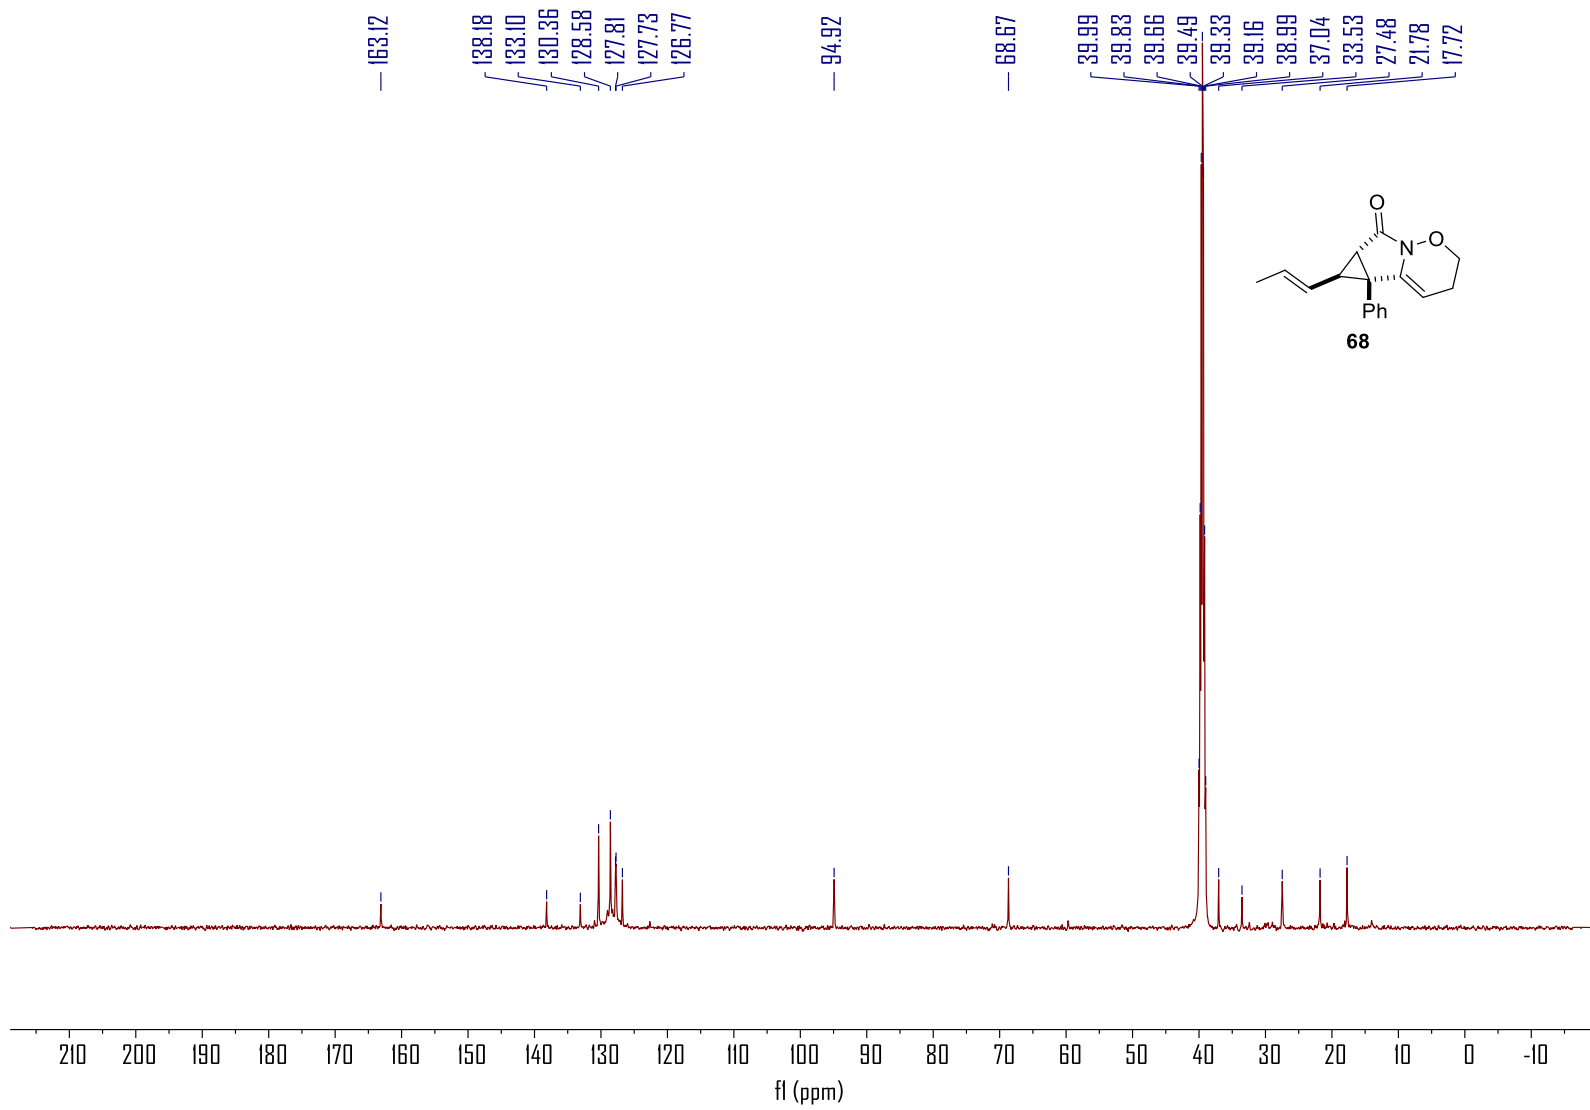

7.38 7.38 7.37 7.19 7.18 7.18 7.17 7.17 7.17 7.16 7.15 7.14 7.13 7.12 7.12 7.10 7.09 7.08 6.64 6.63 6.63 4.62 4.61 4.61 4.35 4.33 4.32 4.31 4.15 4.14 4.14 4.13 2.68 2.43 2.42 2.40 2.39 2.15 2.14 2.14 2.12 2.11 1.46

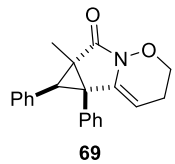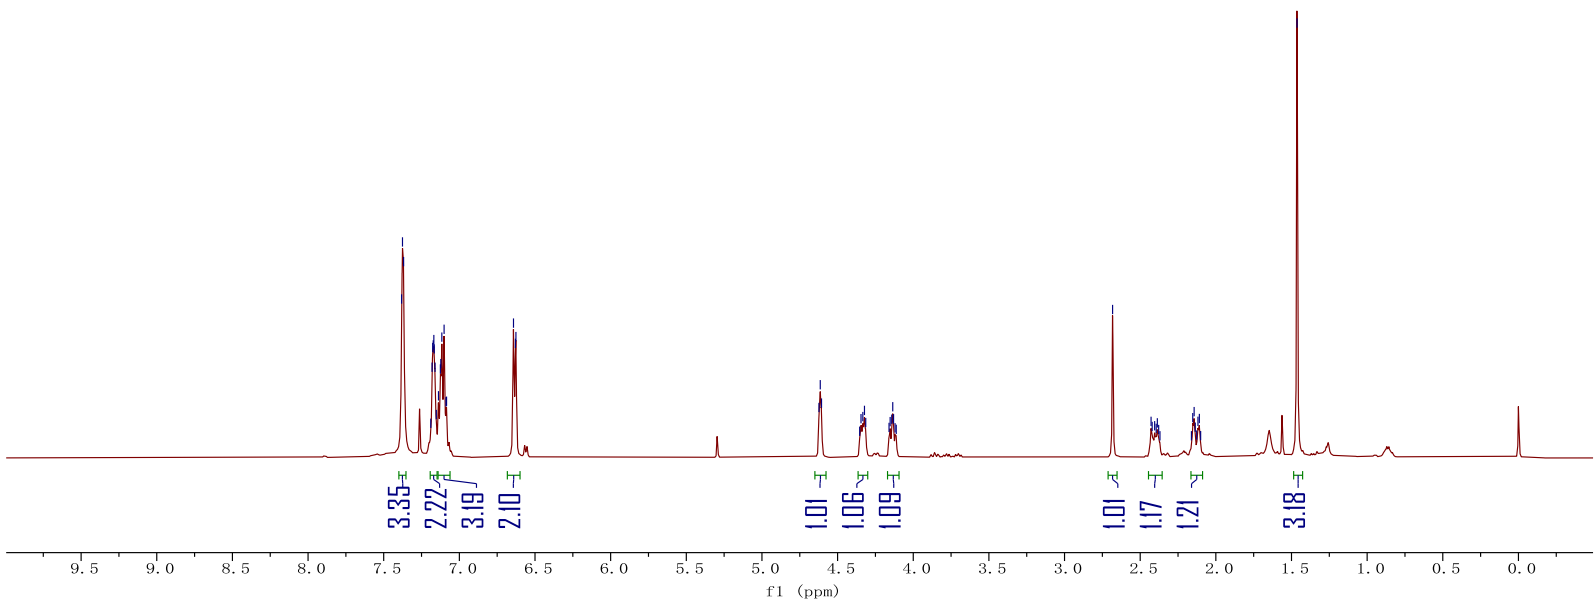

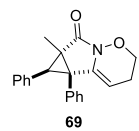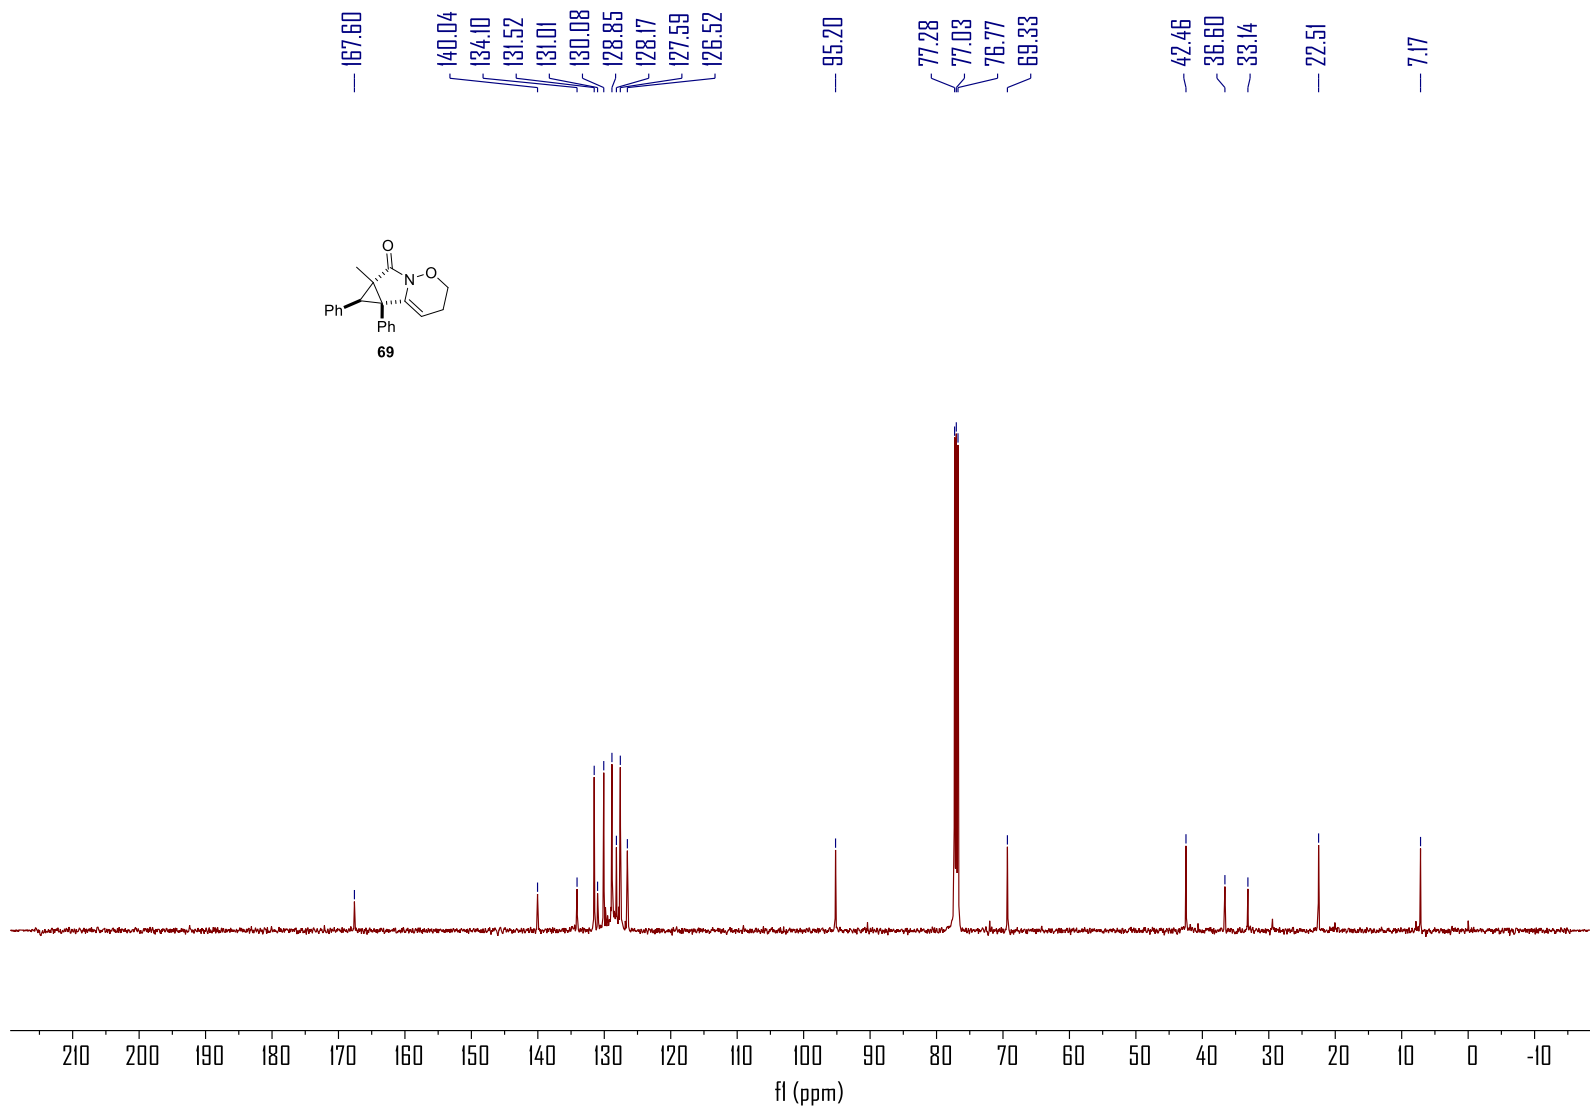

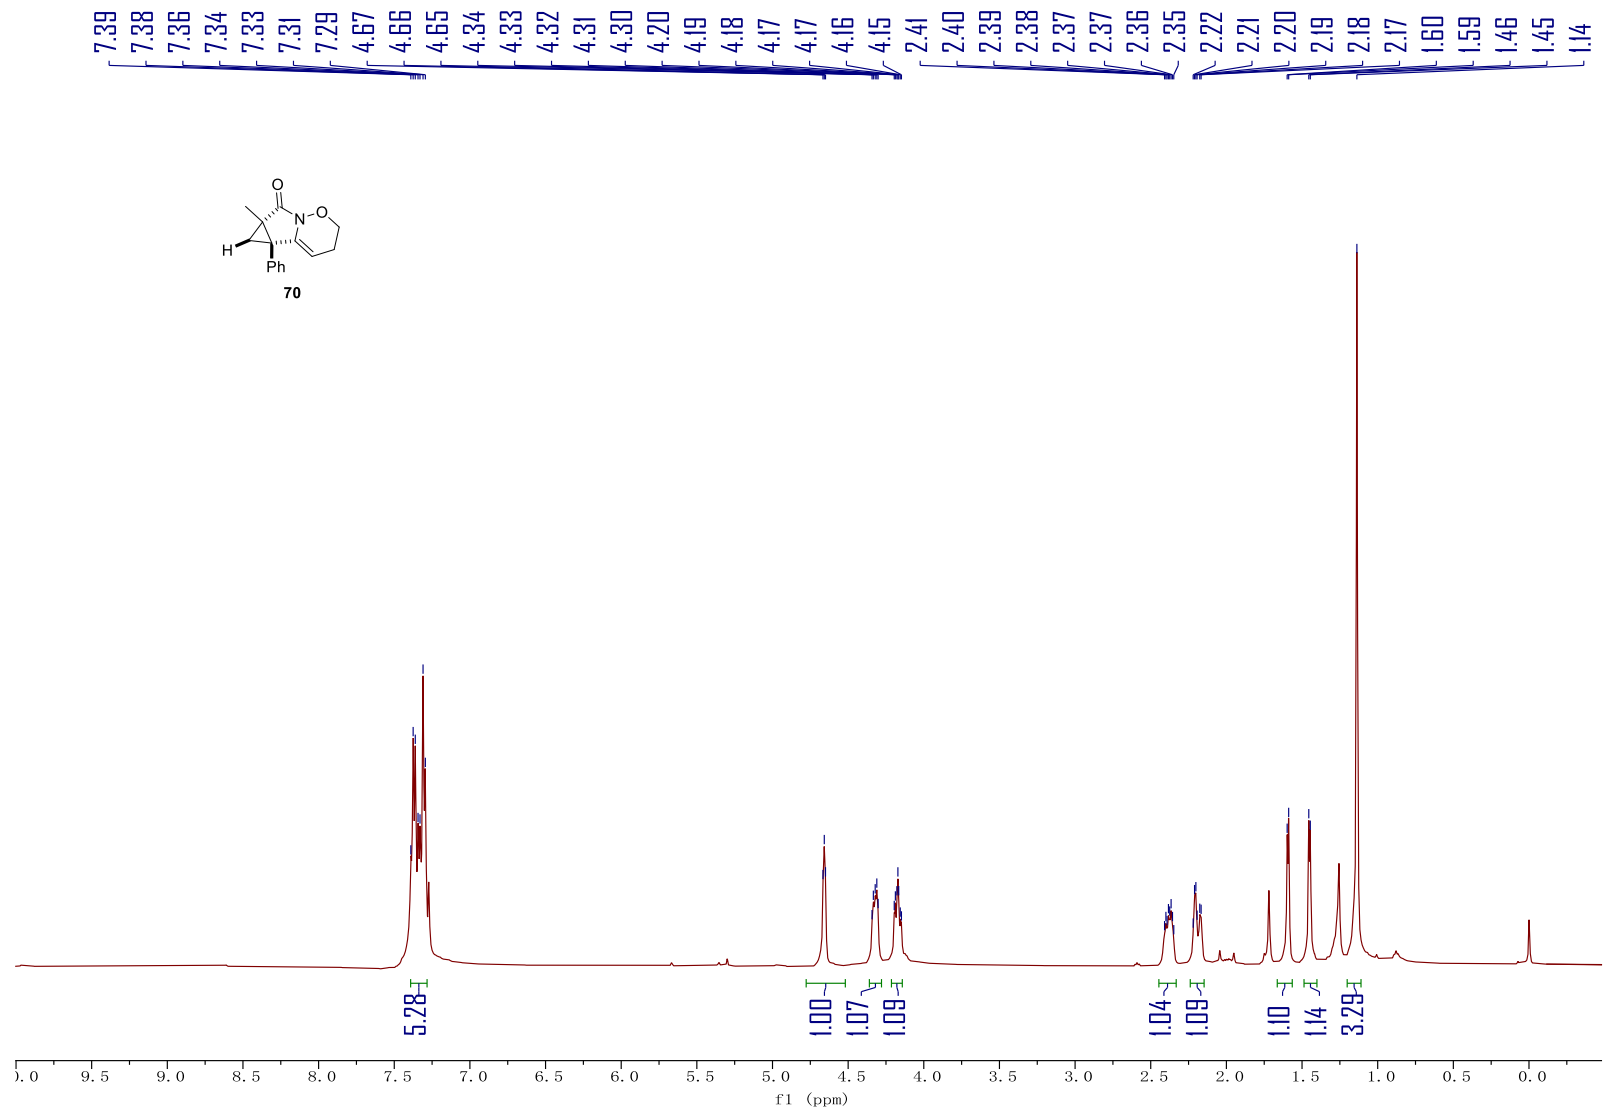

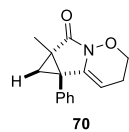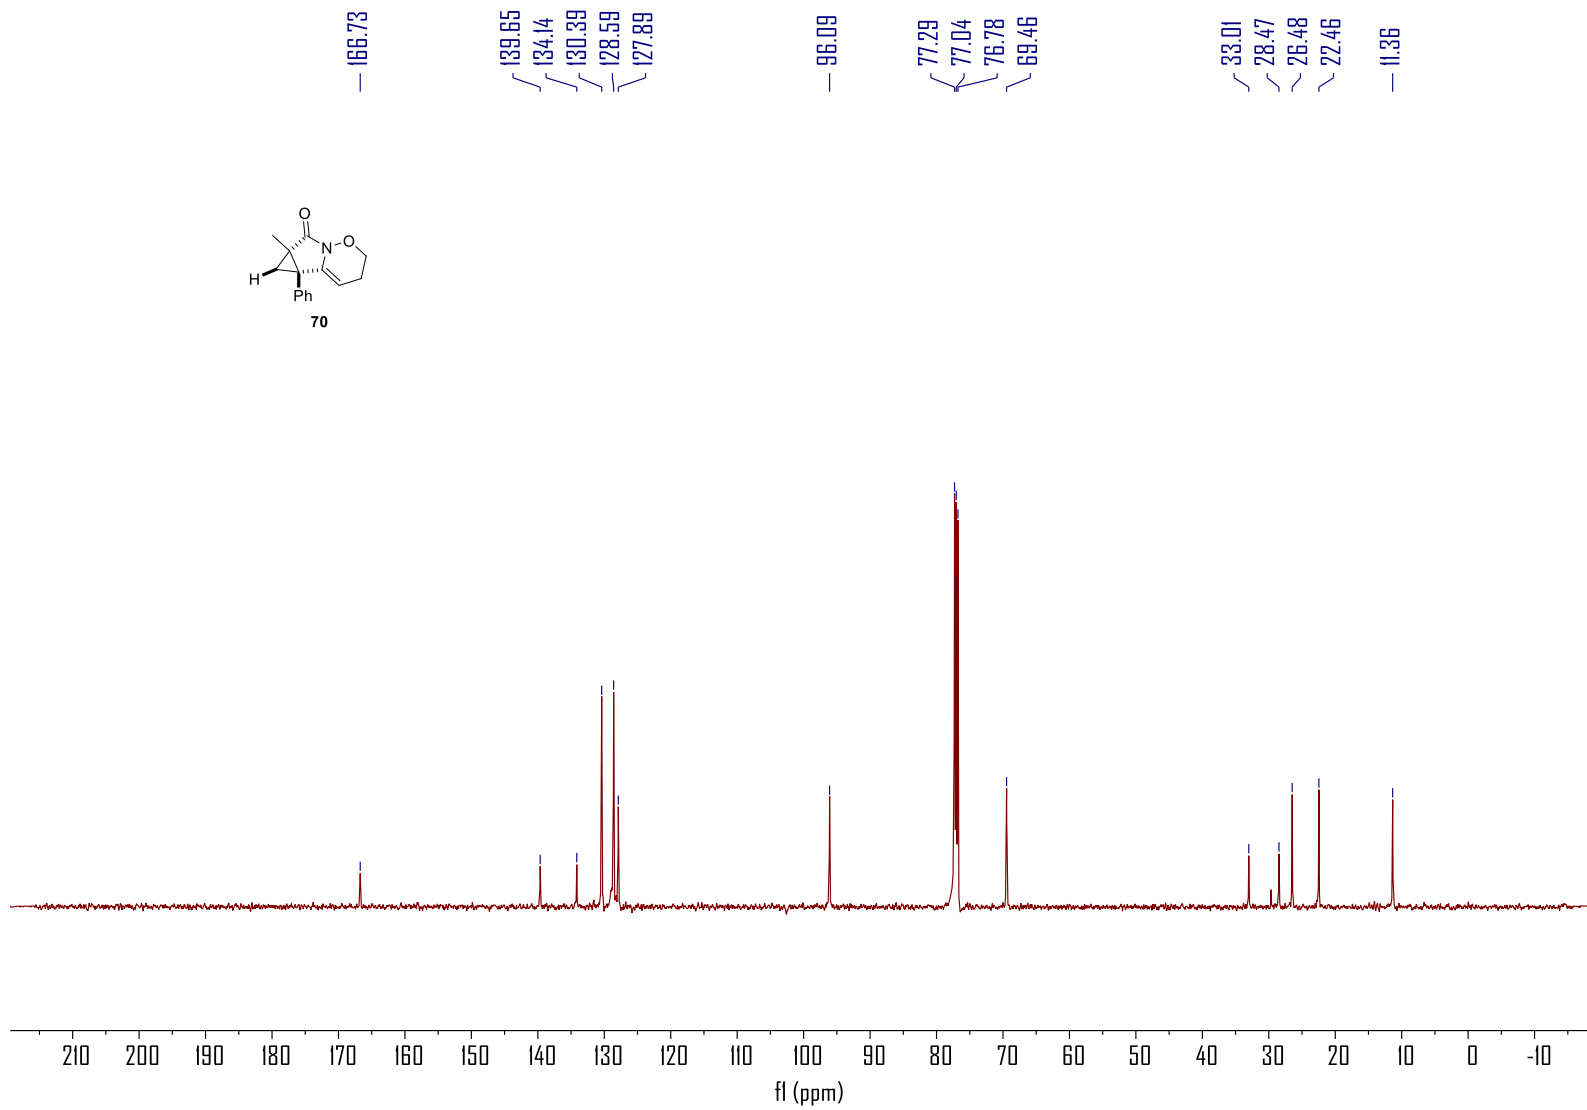



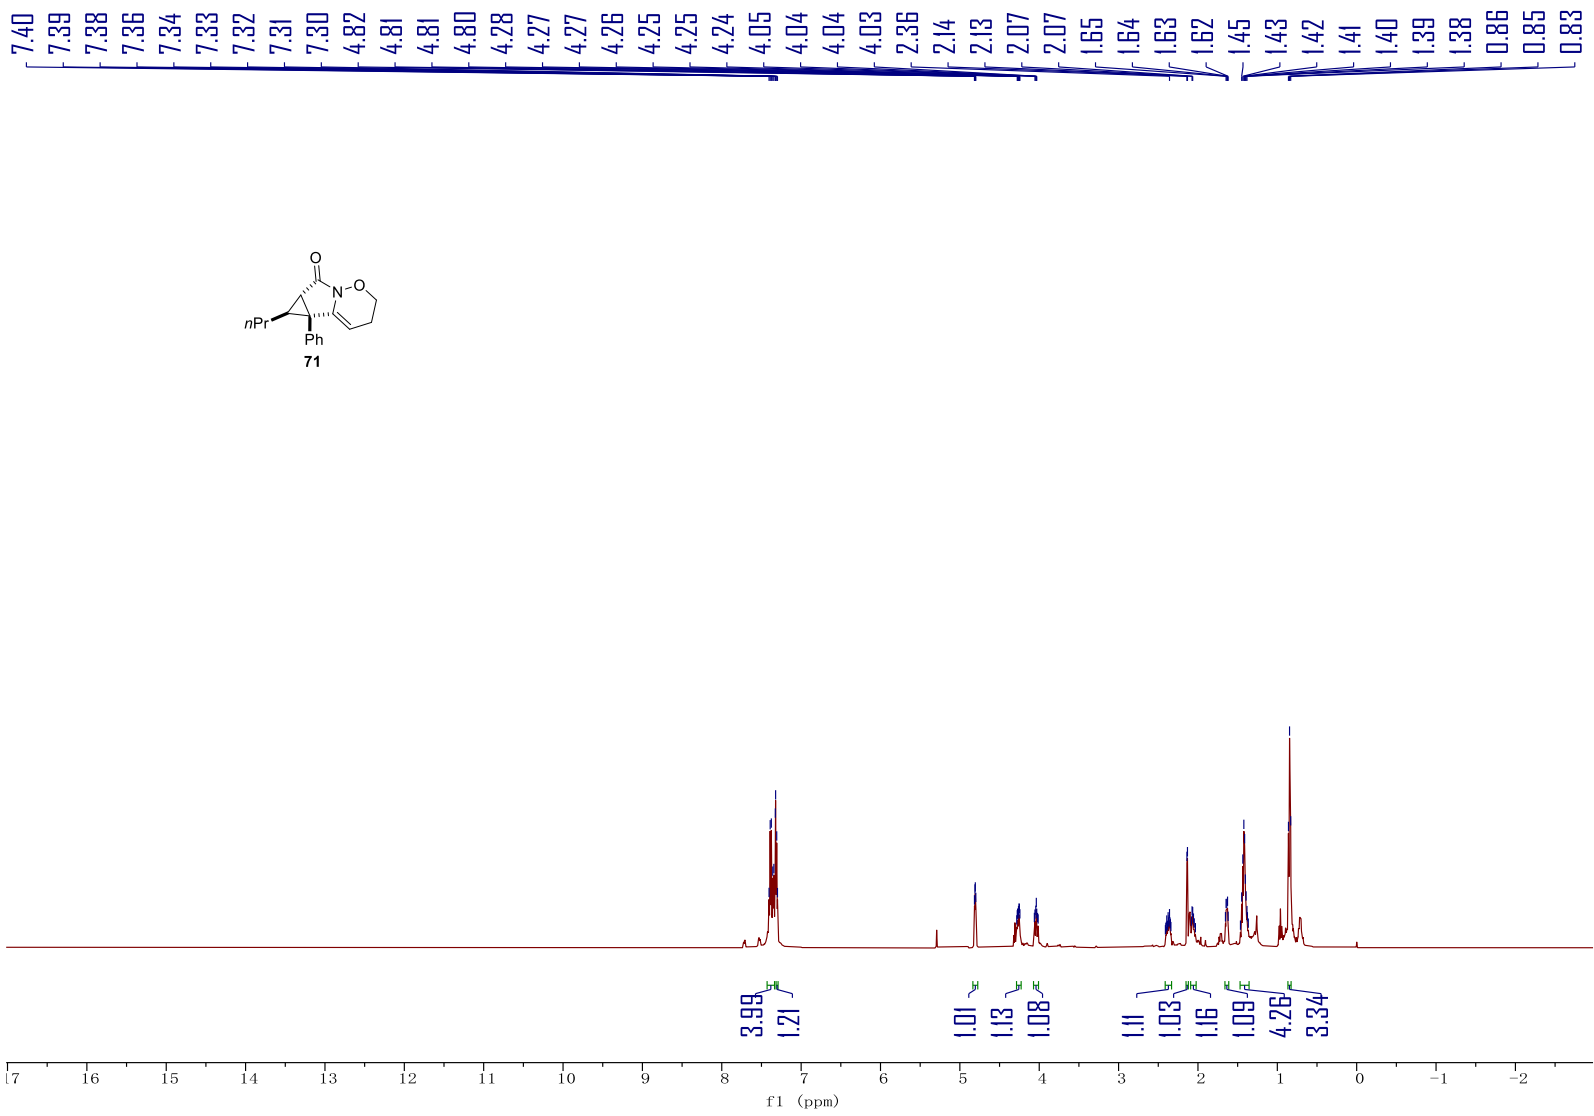

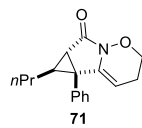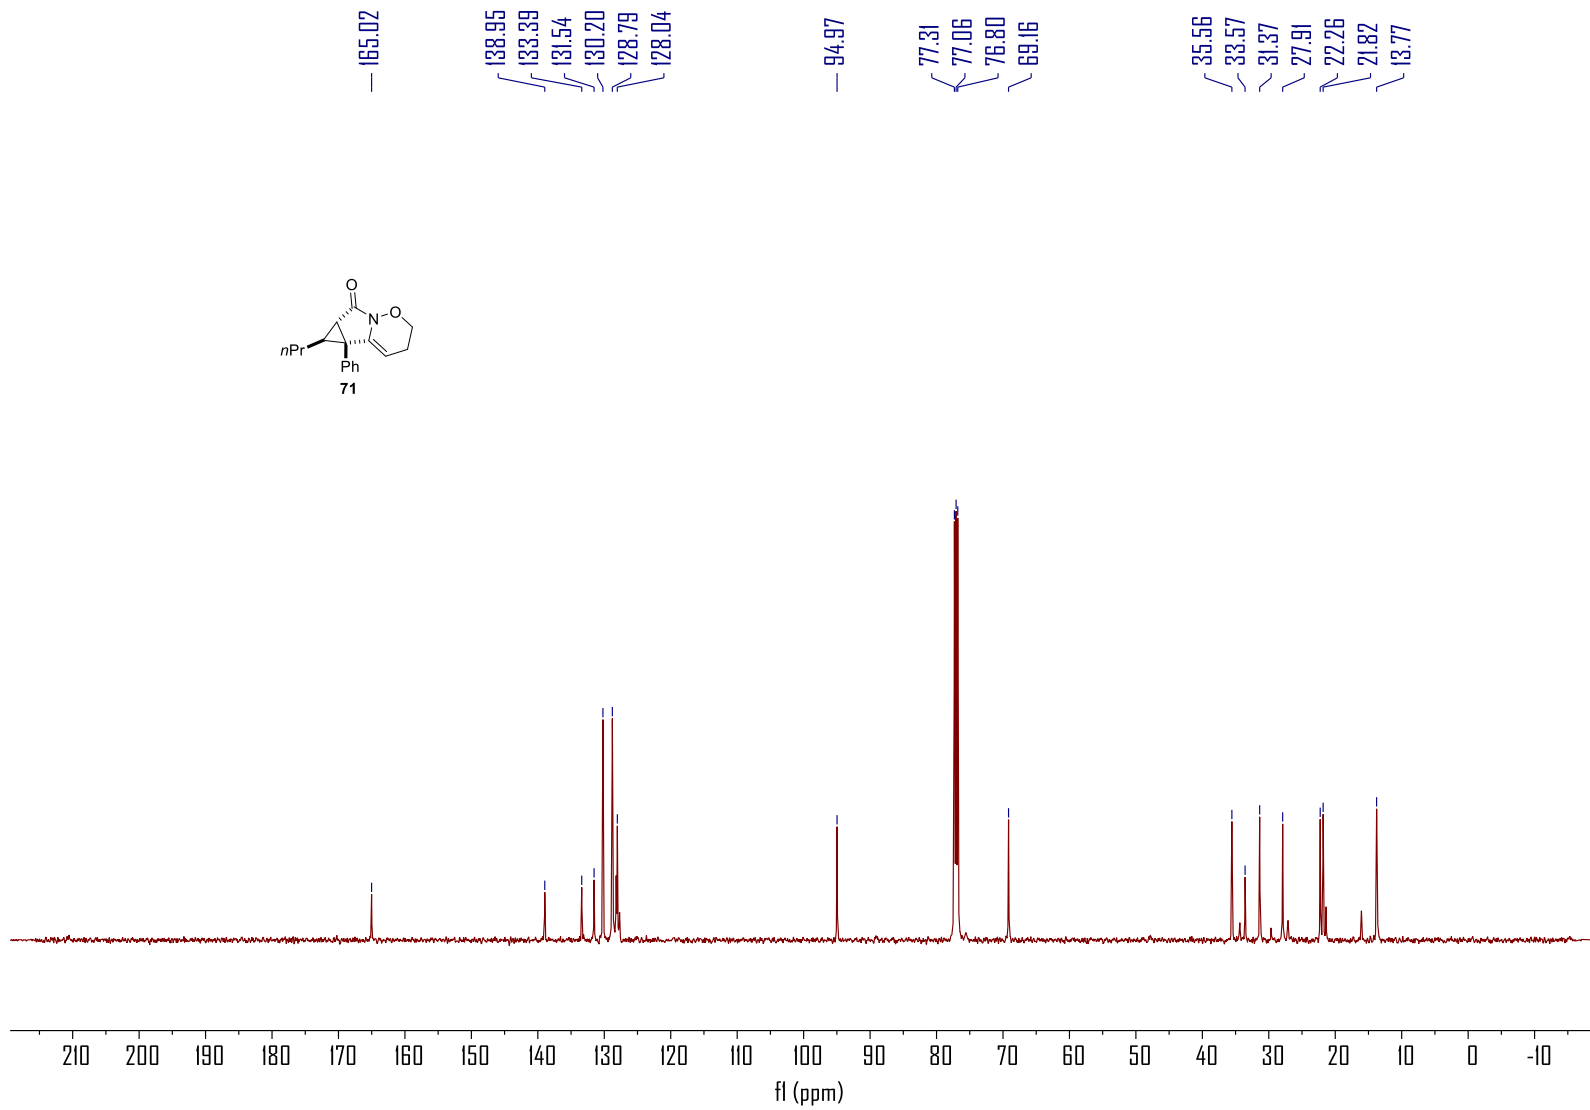

7.23 7.22 7.21 7.13 7.12 7.12 7.11 7.07 7.07 7.06 6.76 6.75 6.74 6.74 4.81 4.81 4.80 4.80 4.35 4.34 4.33 4.33 4.32 4.31 4.14 4.13 4.12 4.11 4.11 4.10 4.09 2.88 2.87 2.78 2.77 2.44 2.43 2.42 2.41 2.16 2.15 2.13 2.12

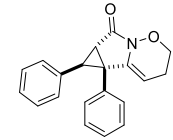

72

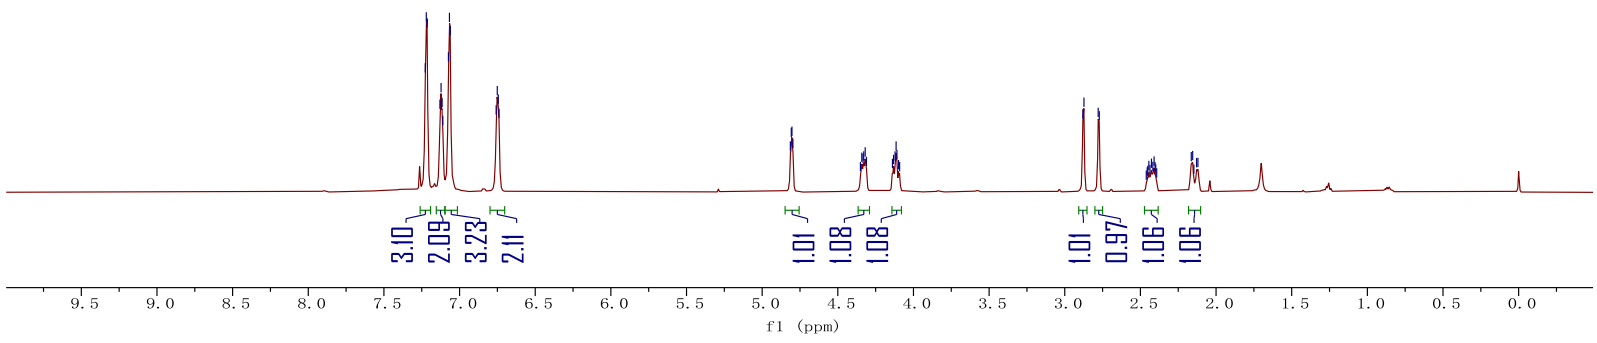

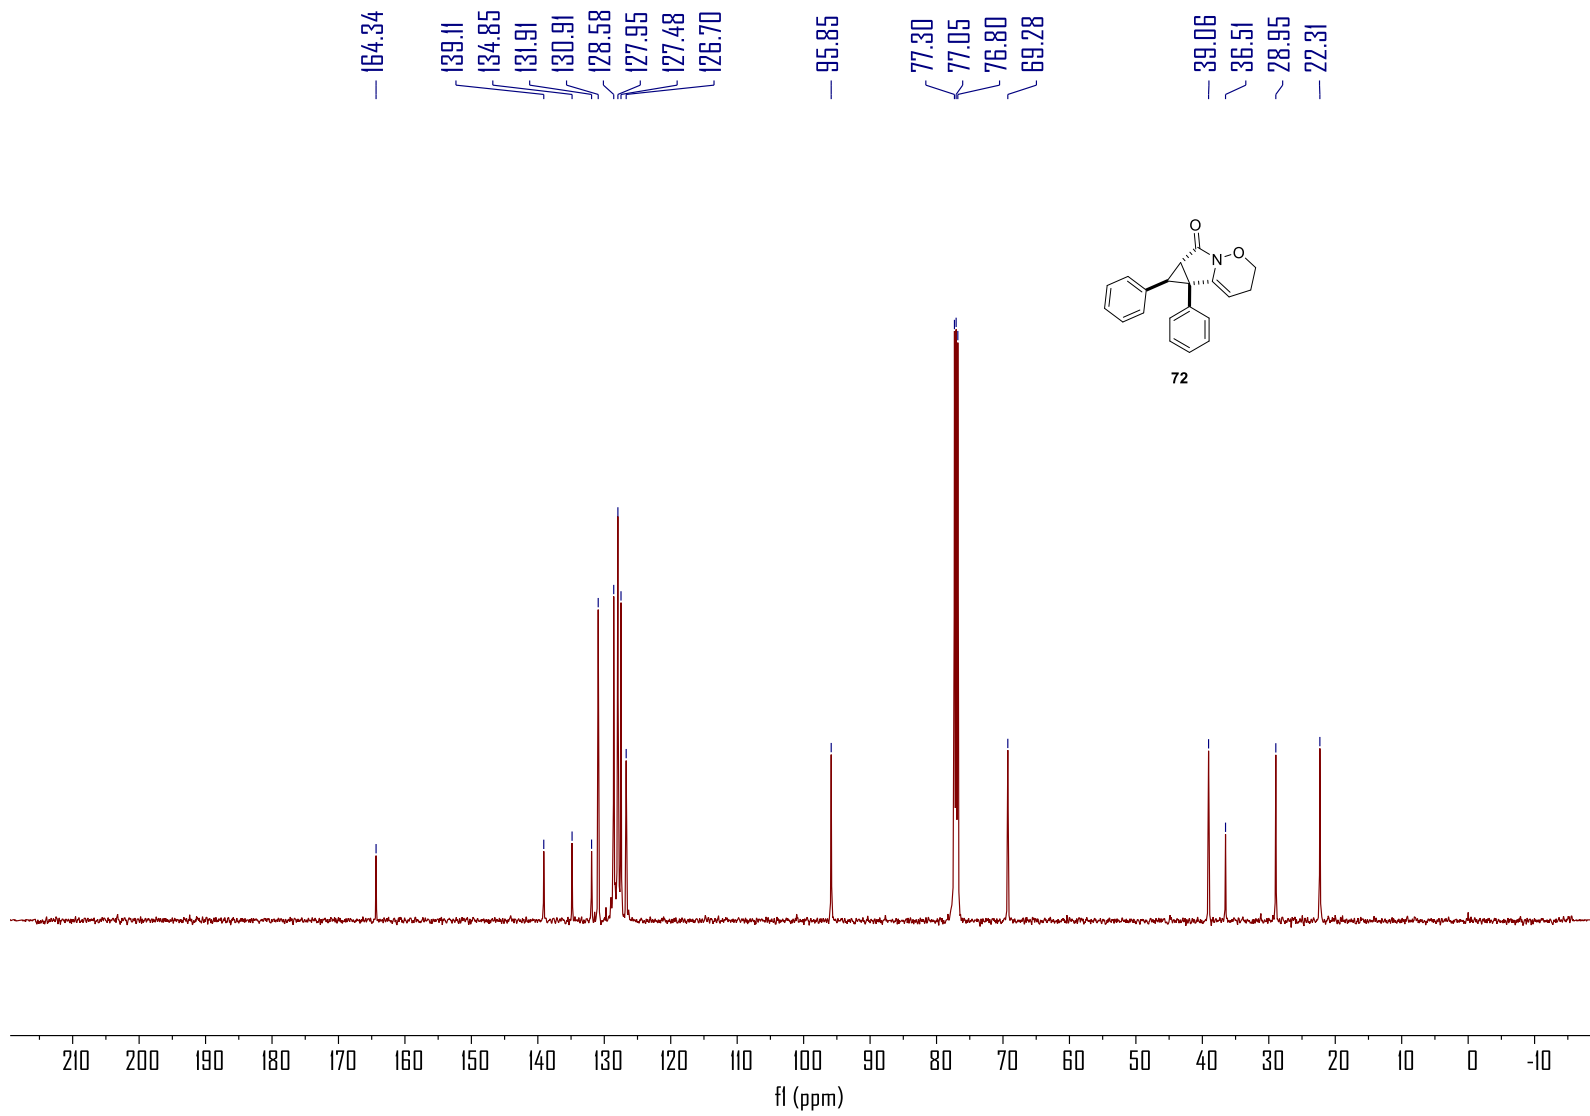

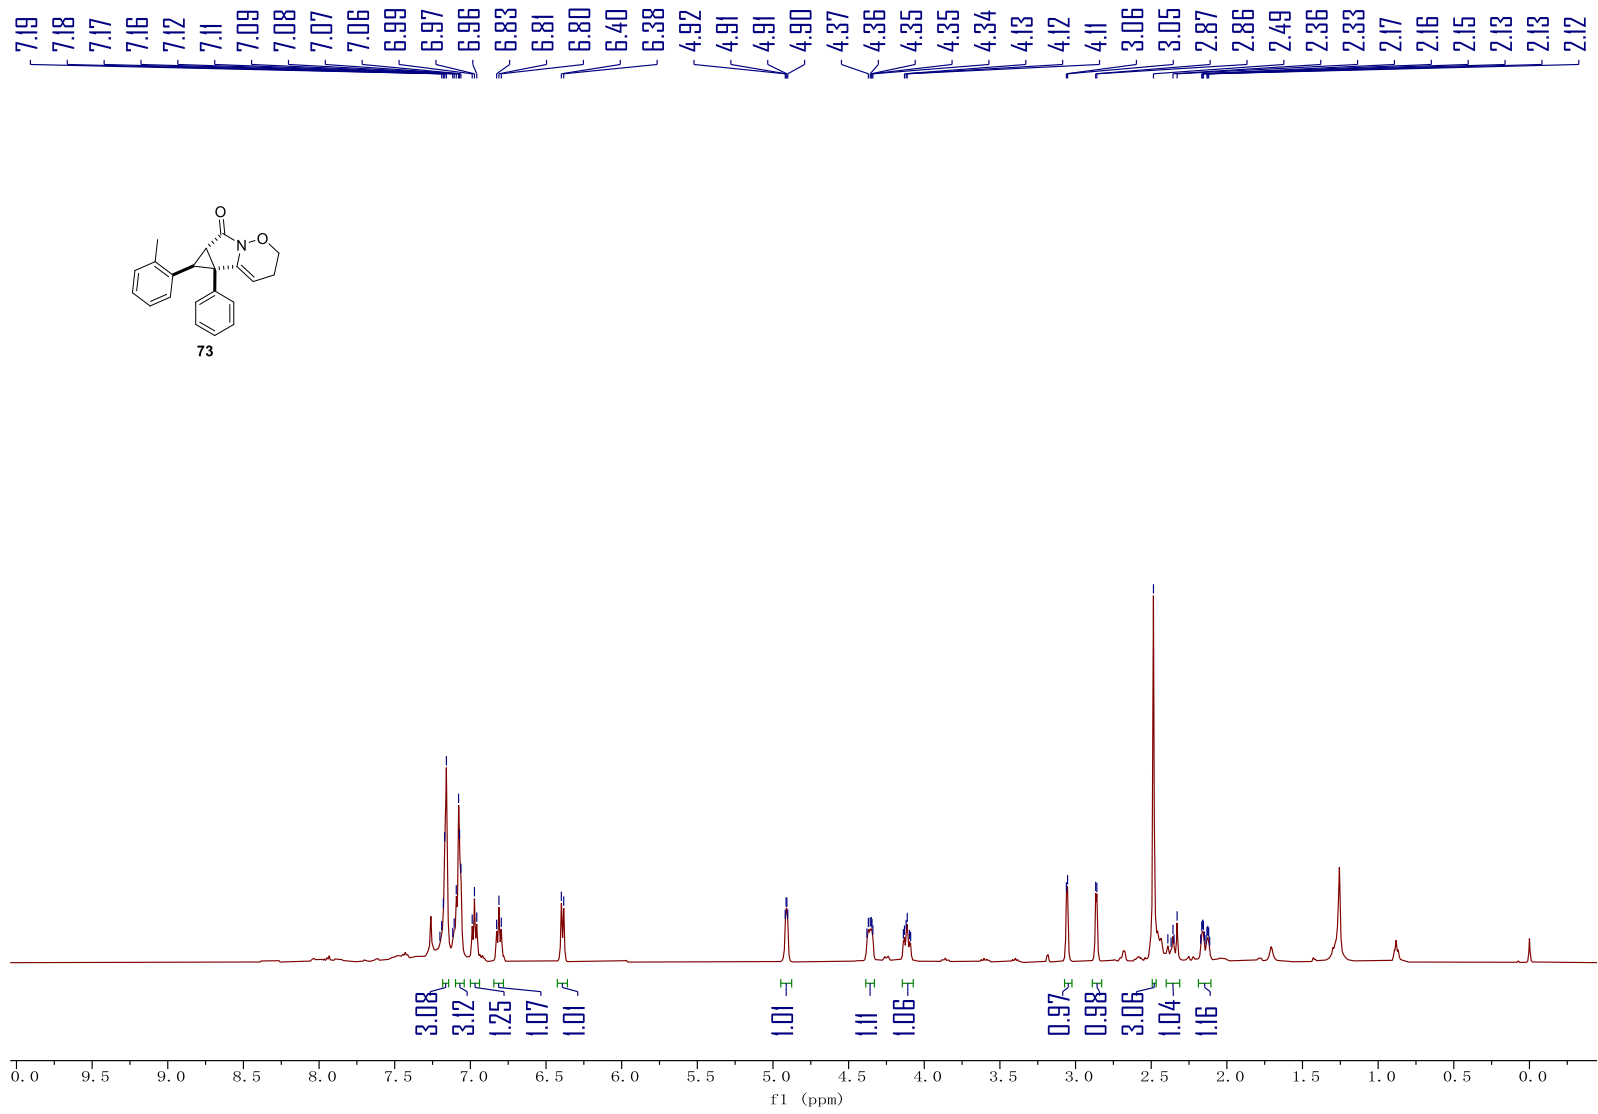

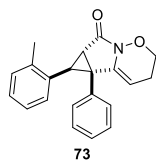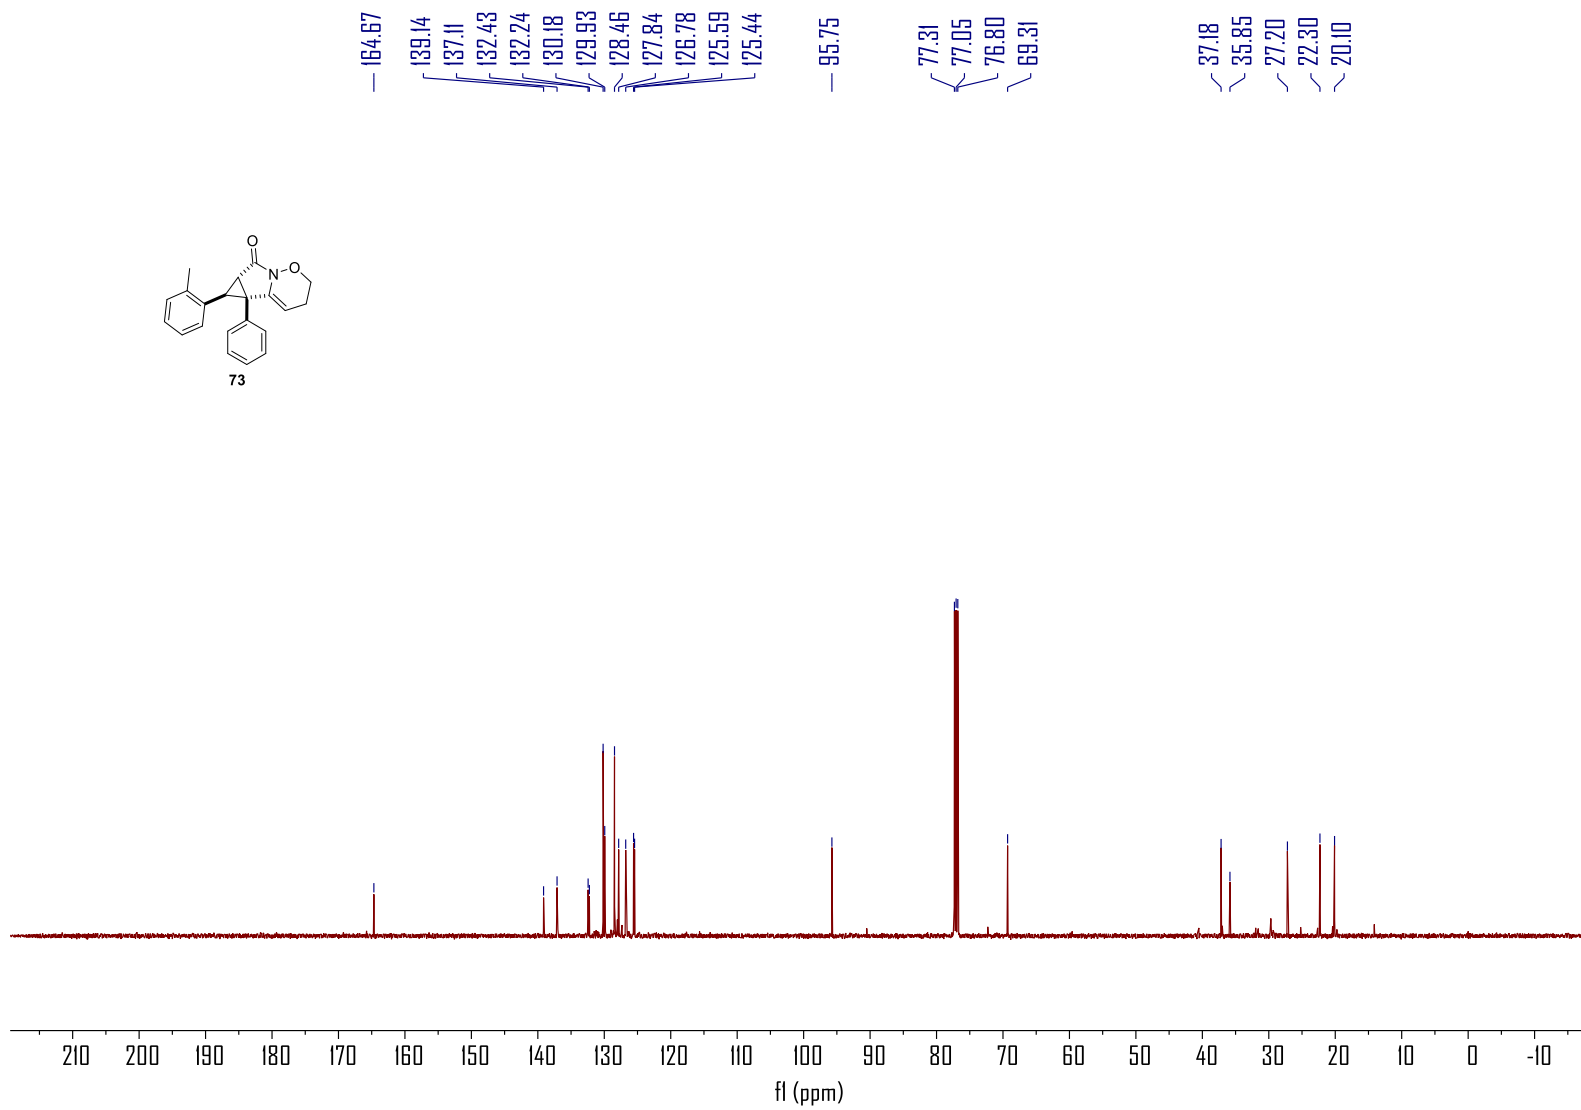

7.23 7.23 7.22 7.22 7.14 7.13 7.12 7.12 6.95 6.93 6.92 6.88 6.86 6.62 6.48 6.46 4.81 4.80 4.80 4.79 4.33 4.32 4.32 4.31 4.31 4.30 4.13 4.12 4.11 4.10 2.86 2.85 2.74 2.73 2.43 2.43 2.40 2.15 2.14 2.12 2.12 2.12 2.12 2.11

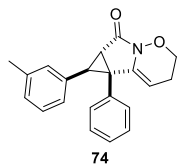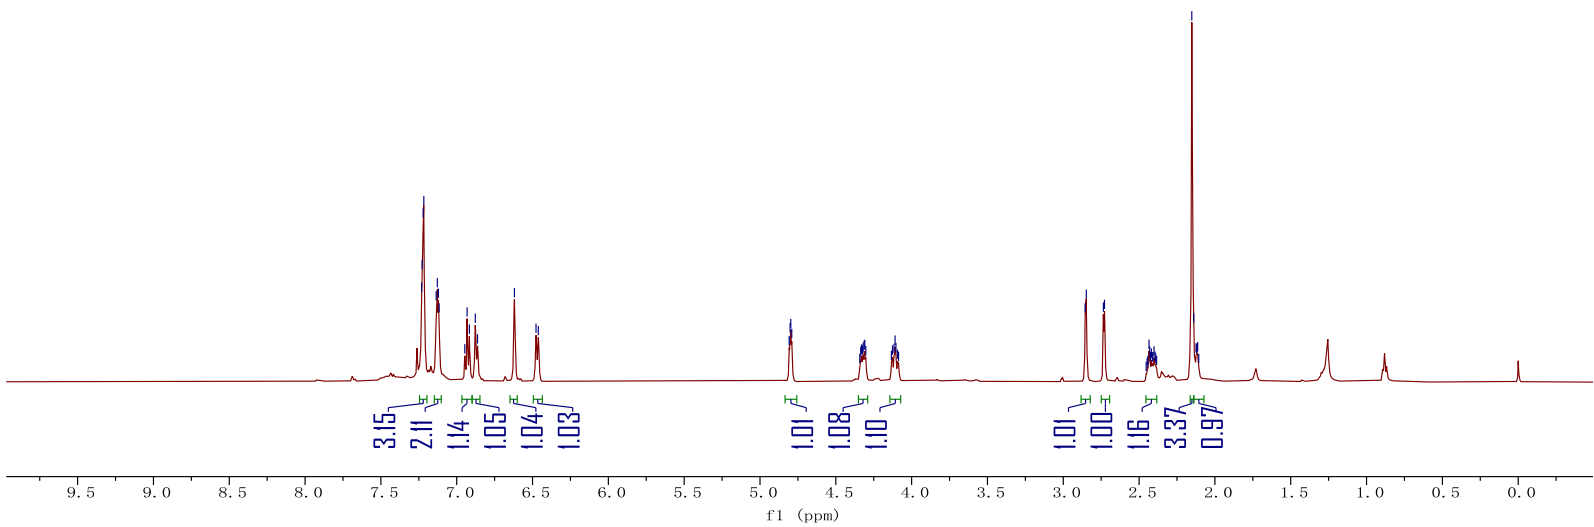

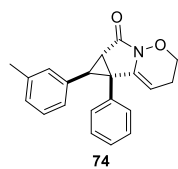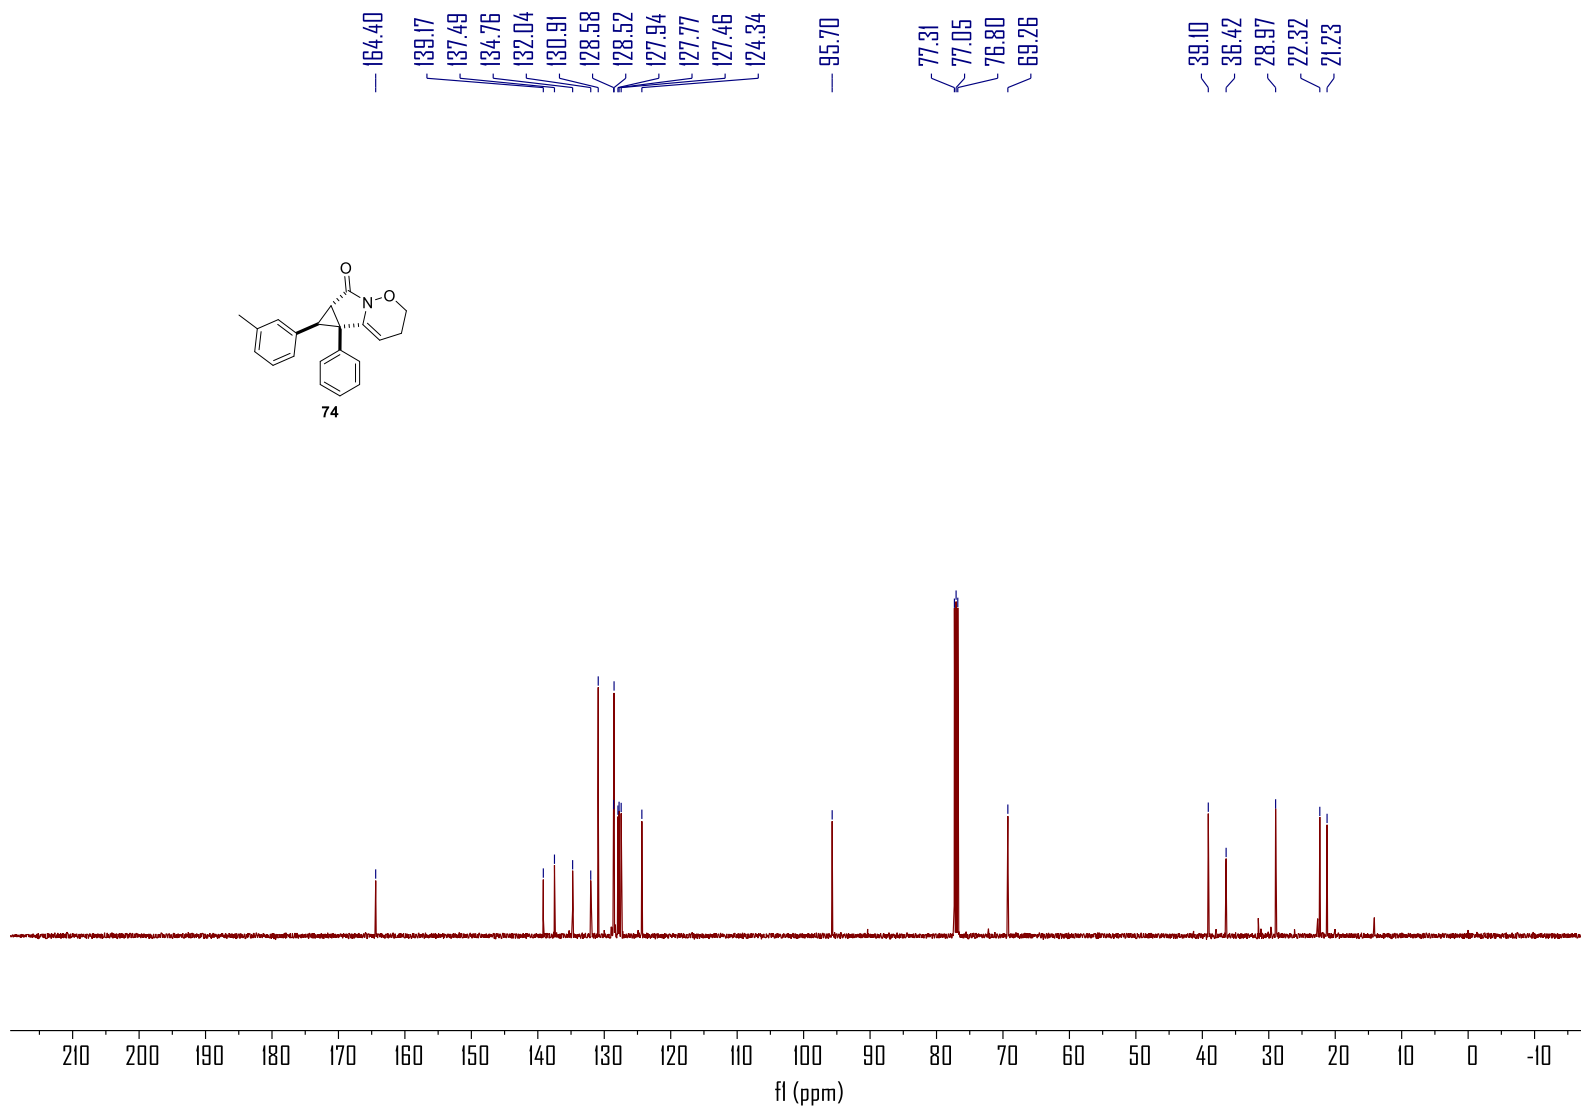



7.24  
7.23  
7.23  
7.12  
7.12  
7.11  
7.10  
6.78  
6.77  
6.75  
6.73  
6.72  
6.71  
6.70  
4.83  
4.82  
4.82  
4.81  
4.35  
4.34  
4.33  
4.32  
4.31  
4.31  
4.13  
4.13  
4.12  
4.11  
4.10  
4.09  
2.84  
2.83  
2.76  
2.75  
2.44  
2.42  
2.42  
2.41  
2.41  
2.16  
2.15  
2.13  
2.12

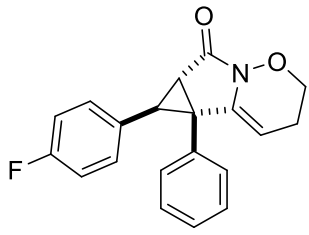

75

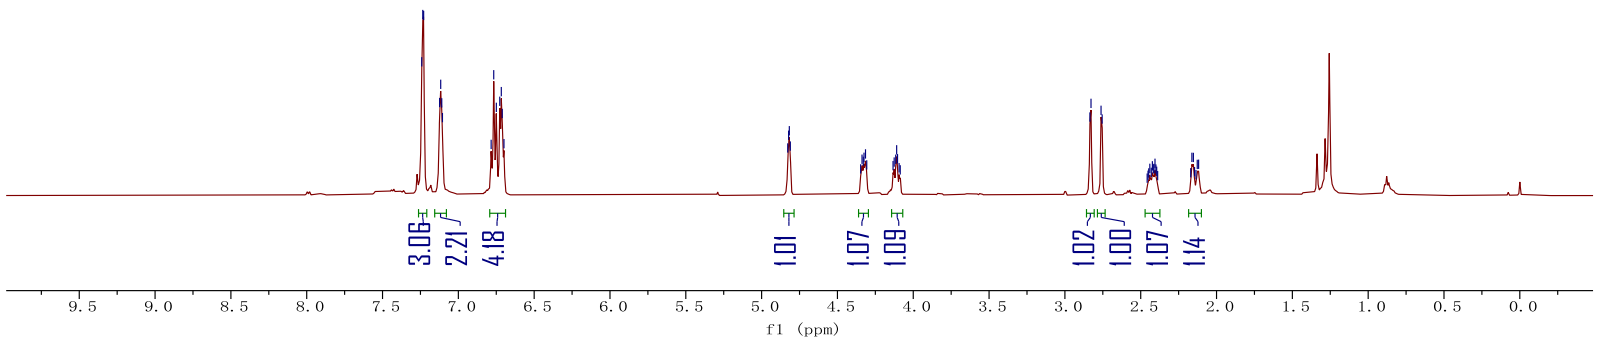

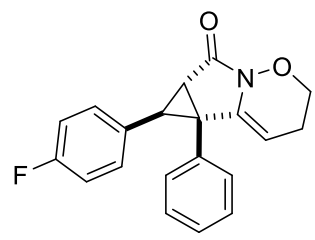

75

164.11 162.56 160.61 138.84 131.67 130.87 130.63 128.96 128.89 128.69 128.12 115.05 114.88 — 96.01 77.33 77.07 76.82 69.27 38.23 36.33 29.68 28.95 22.28

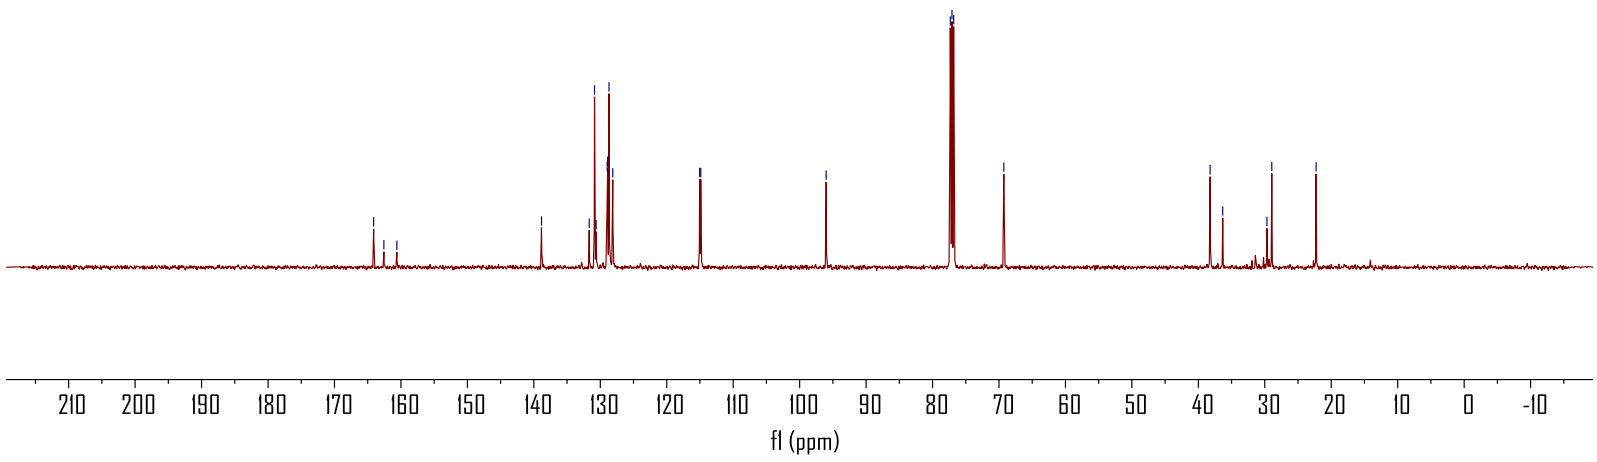

7.31 7.29 7.18 7.03 7.01 7.00 6.91 6.89 6.88 6.52 6.51 4.96 4.95 4.95 4.38 4.37 4.36 4.35 4.34 4.14 4.14 4.13 4.12 4.11 4.10 4.10 3.14 3.14 3.06 3.05 2.52 2.51 2.50 2.49 2.49 2.48 2.47 2.46 2.18 2.17 2.16 2.14 2.13

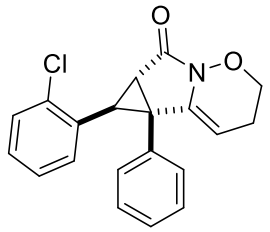

76

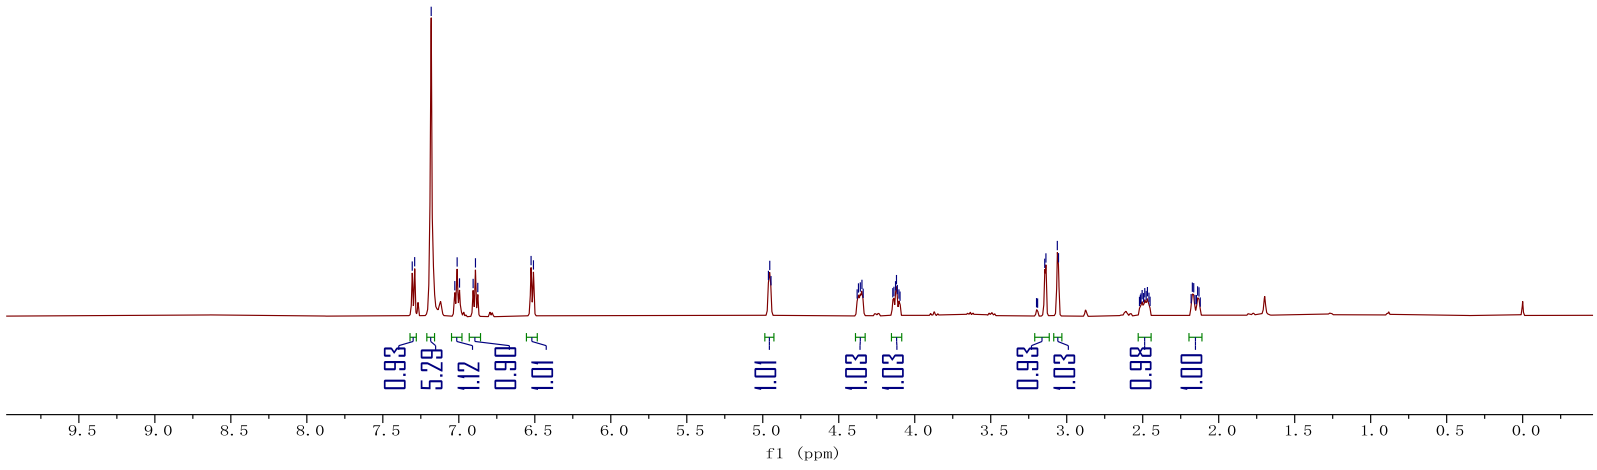

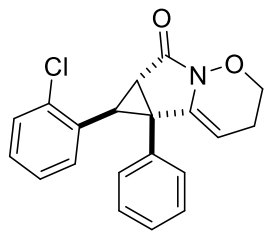

76

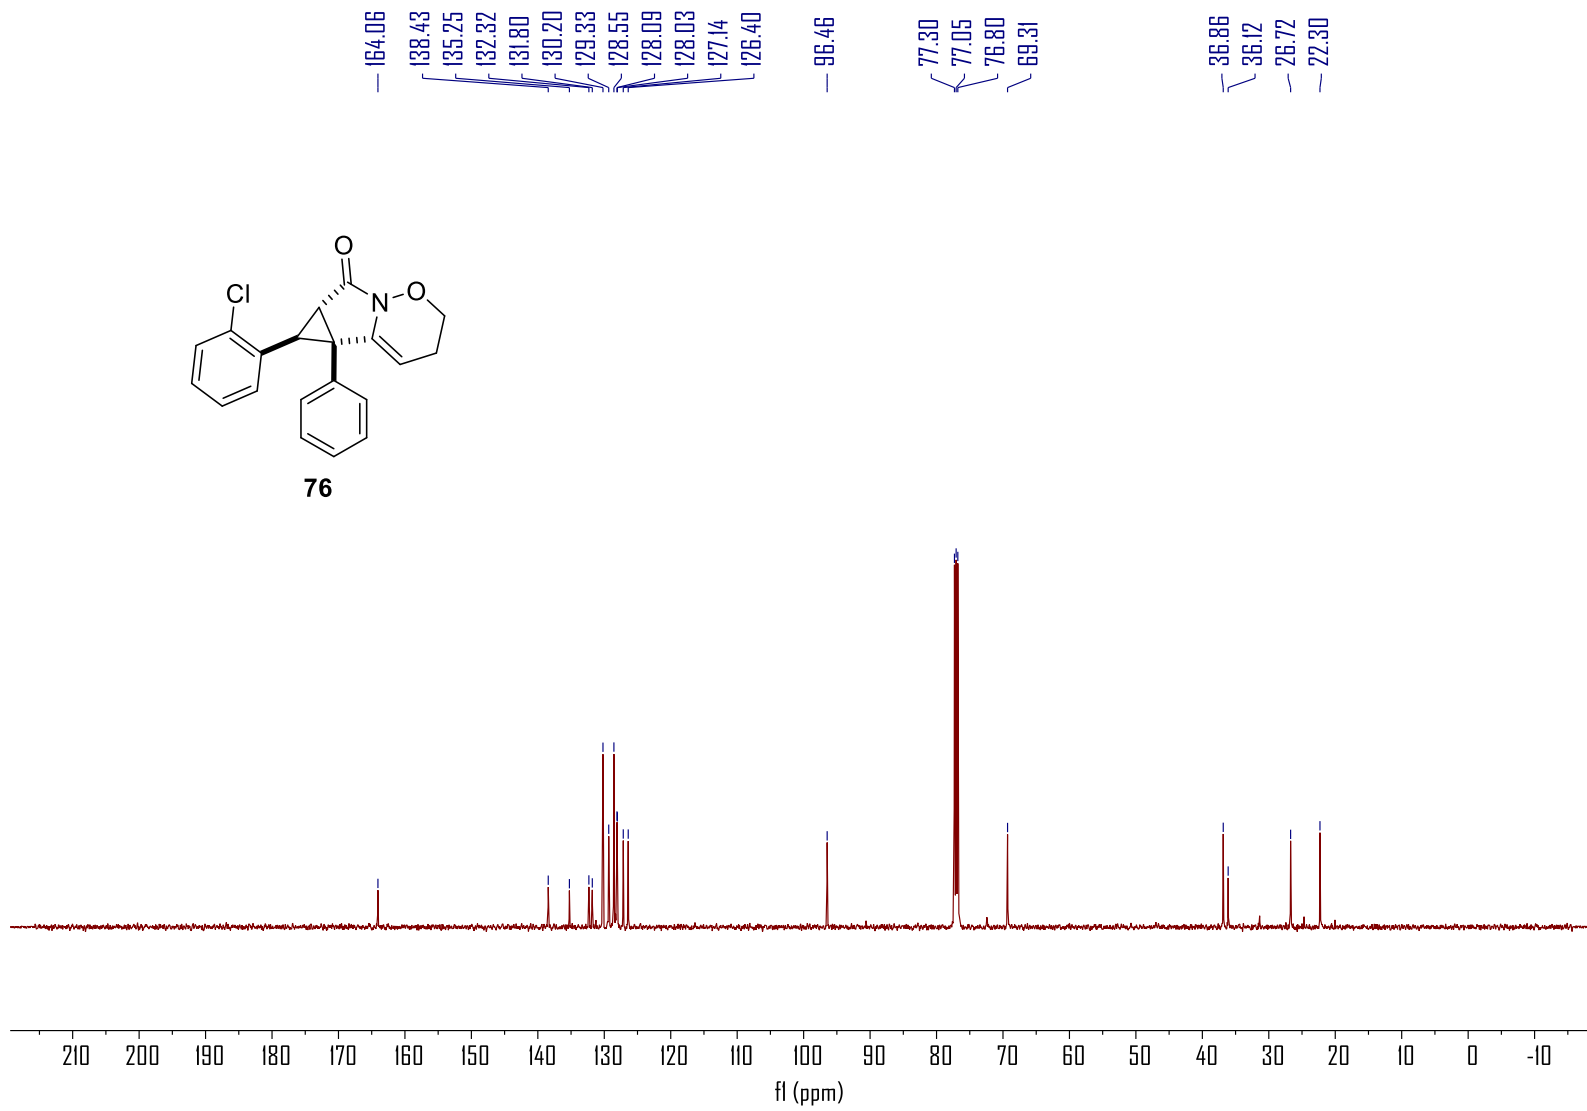

7.25  
7.24  
7.24  
7.12  
7.12  
7.11  
7.10  
7.05  
7.03  
6.68  
6.66  
4.83  
4.82  
4.82  
4.81  
4.34  
4.34  
4.32  
4.32  
4.31  
4.31  
4.13  
4.12  
4.11  
4.11  
4.11  
4.10  
4.09  
4.08  
2.84  
2.83  
2.74  
2.73  
2.44  
2.42  
2.41  
2.40  
2.40  
2.39  
2.16  
2.15  
2.13  
2.12

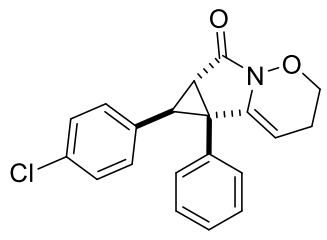

77

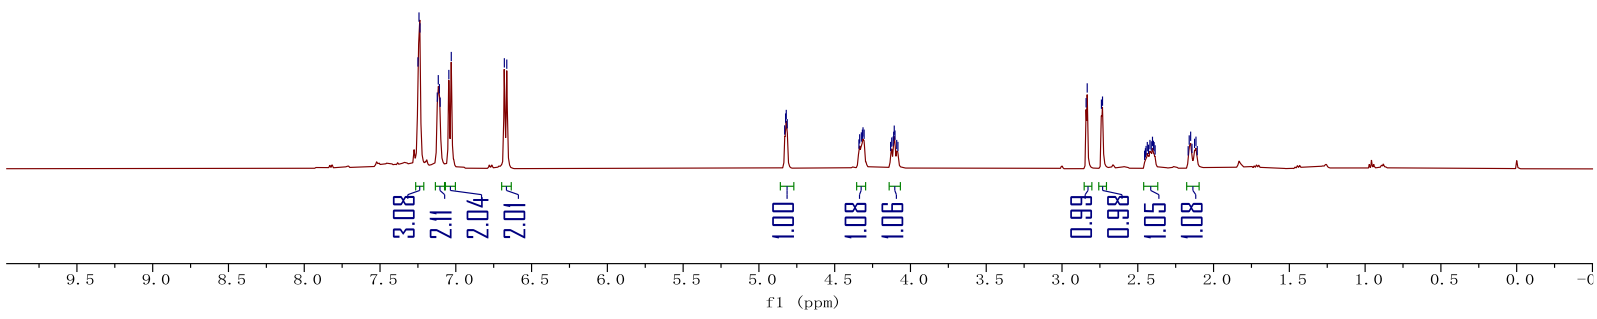

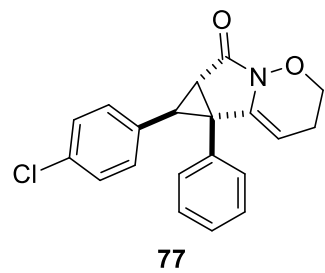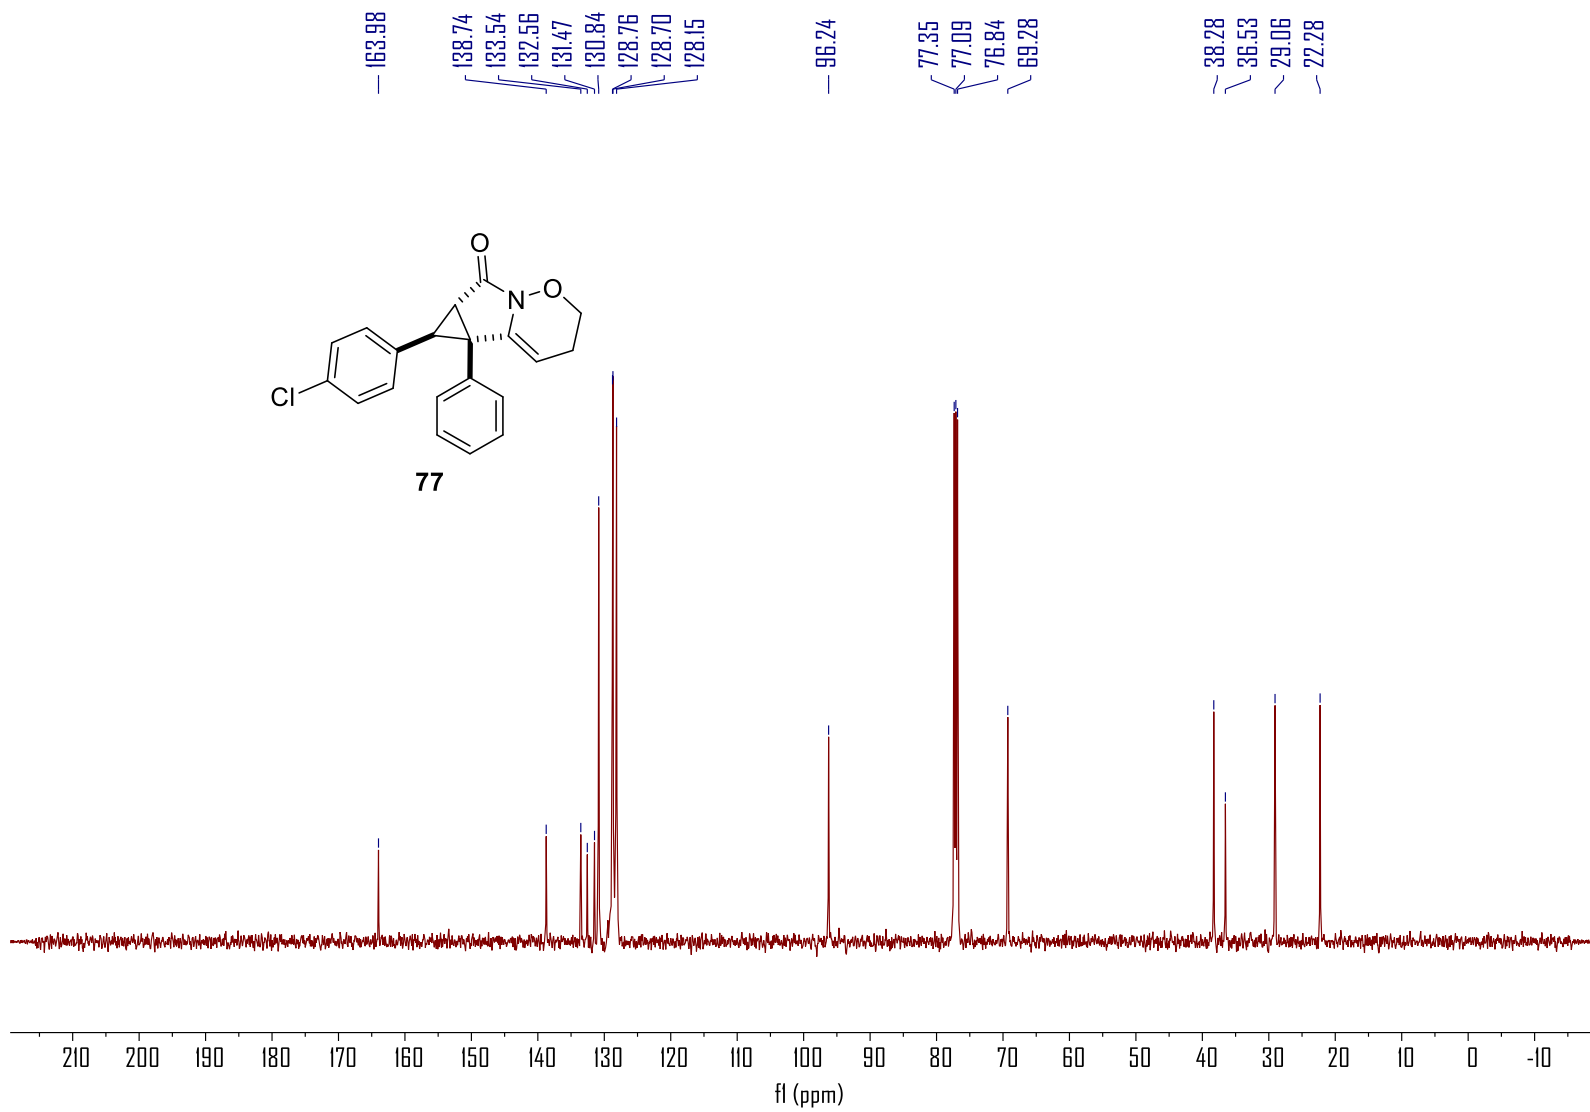

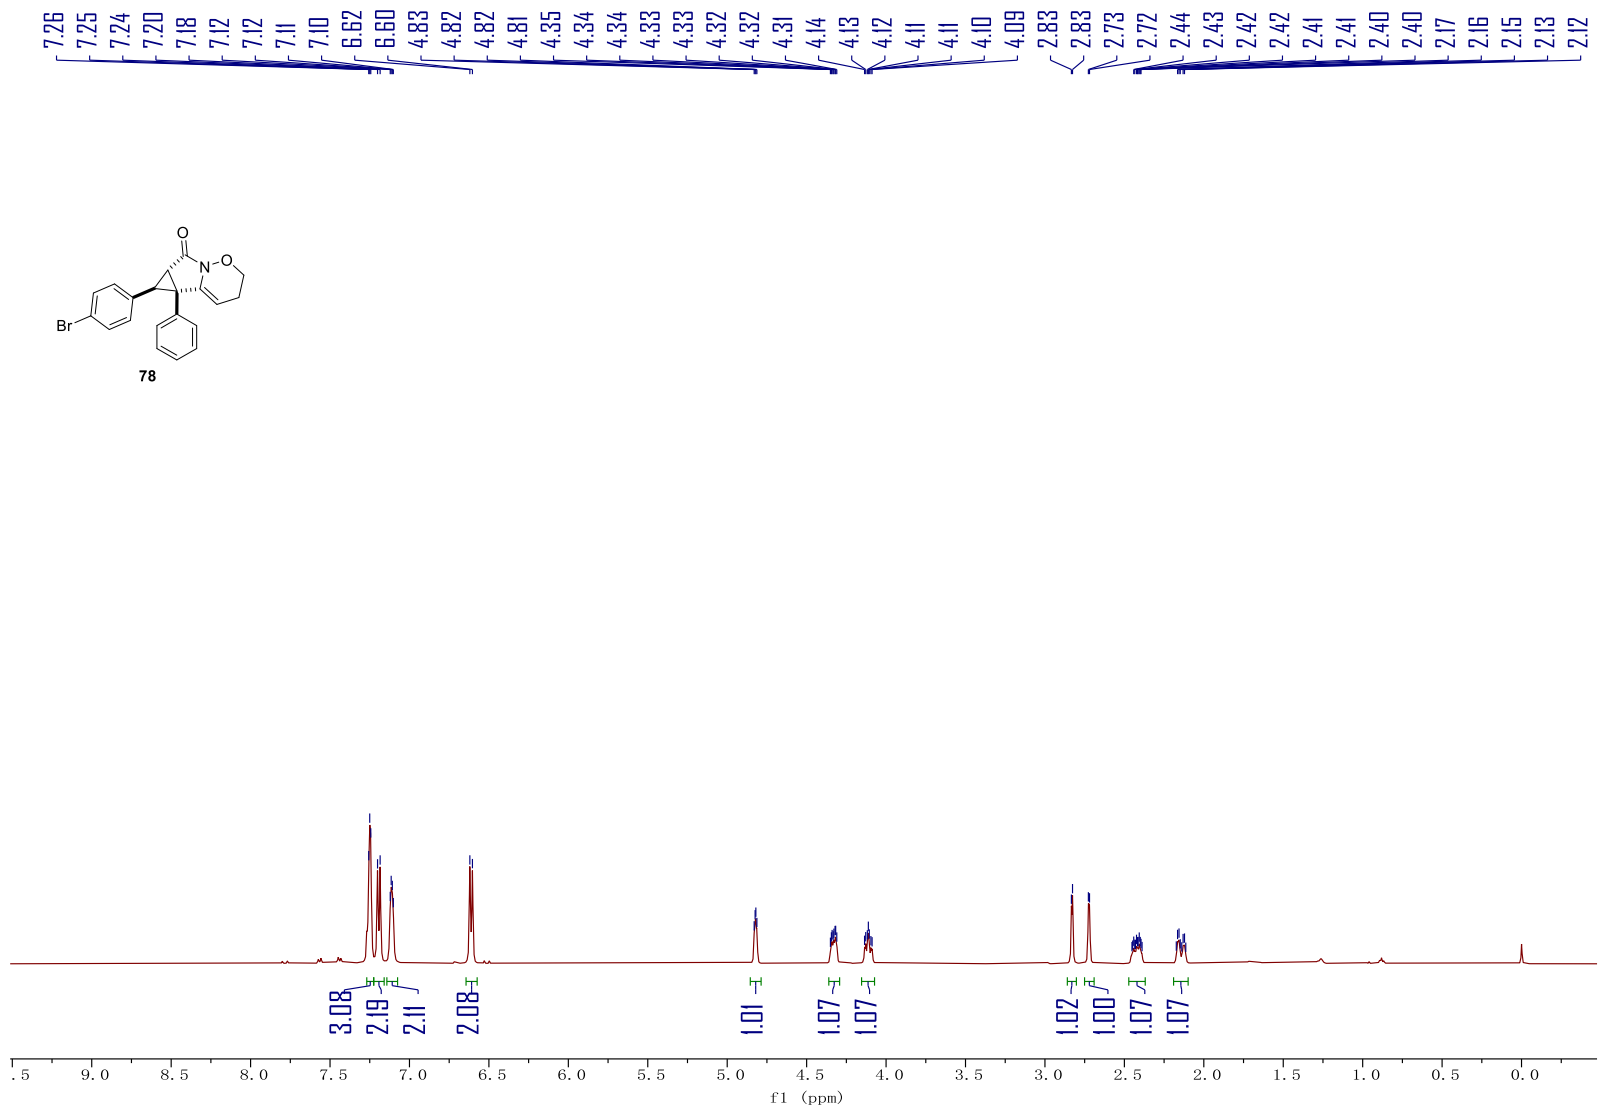

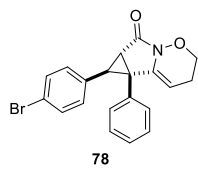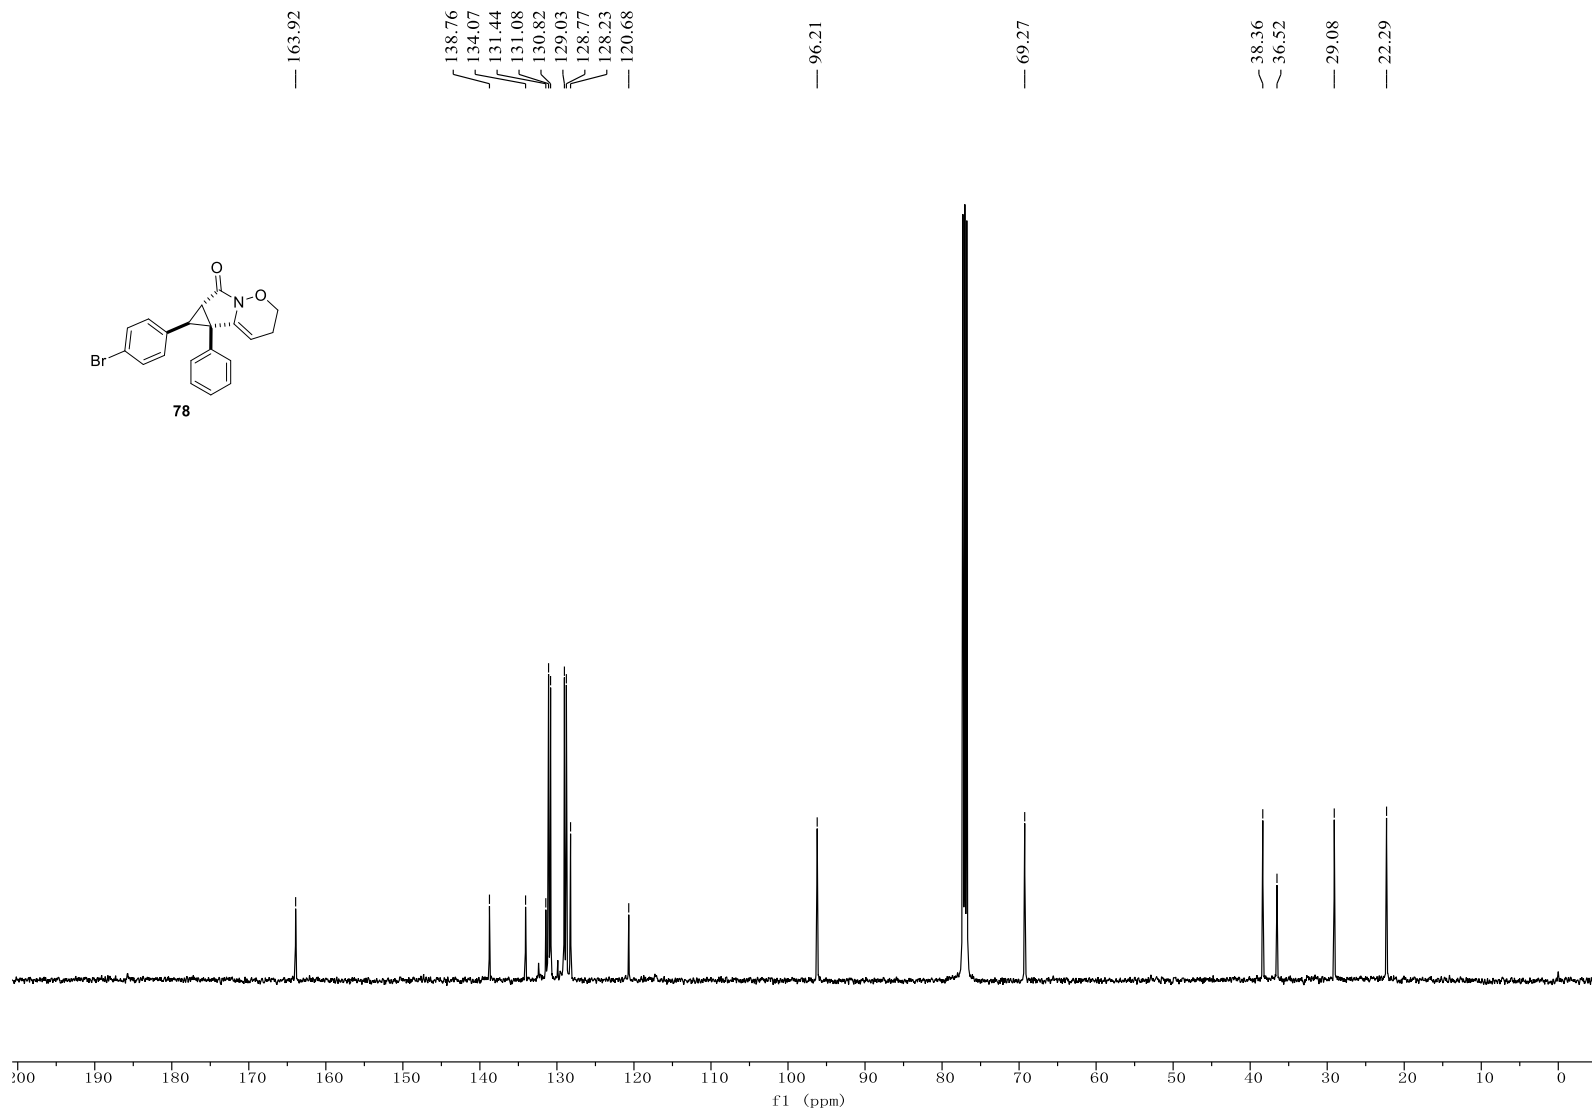



7.95  
7.94  
7.93  
7.27  
7.27  
7.26  
7.26  
7.25  
7.12  
7.12  
7.11  
7.10  
6.91  
6.90  
6.89  
4.89  
4.89  
4.88  
4.88  
4.38  
4.37  
4.37  
4.36  
4.35  
4.35  
4.34  
4.34  
4.15  
4.15  
4.14  
4.13  
4.12  
4.11  
4.11  
2.98  
2.97  
2.86  
2.86  
2.47  
2.45  
2.44  
2.44  
2.43  
2.20  
2.19  
2.16  
2.15

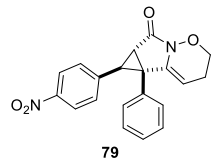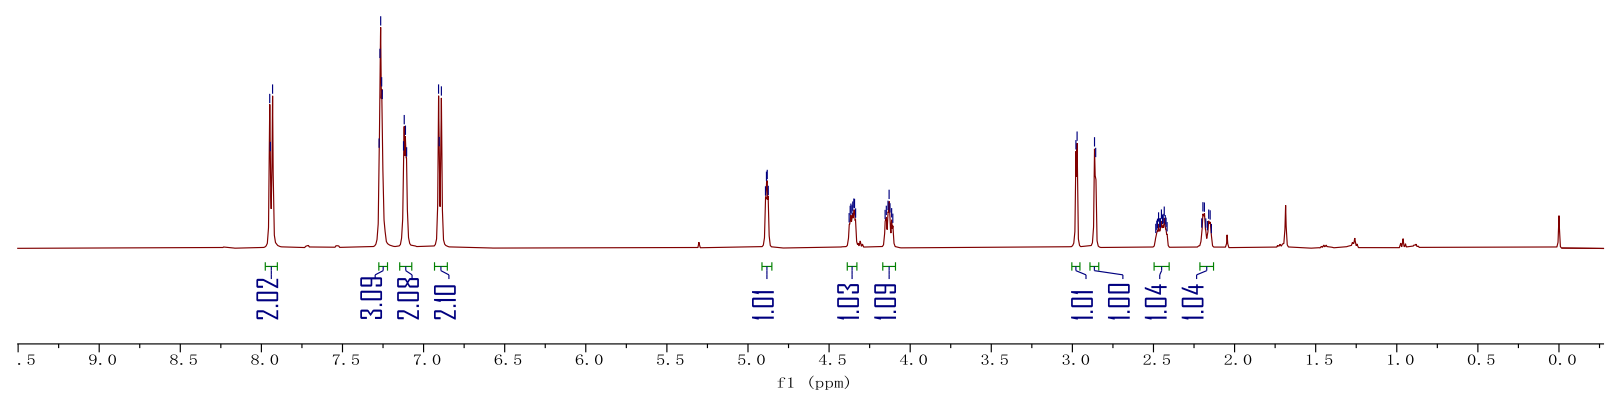

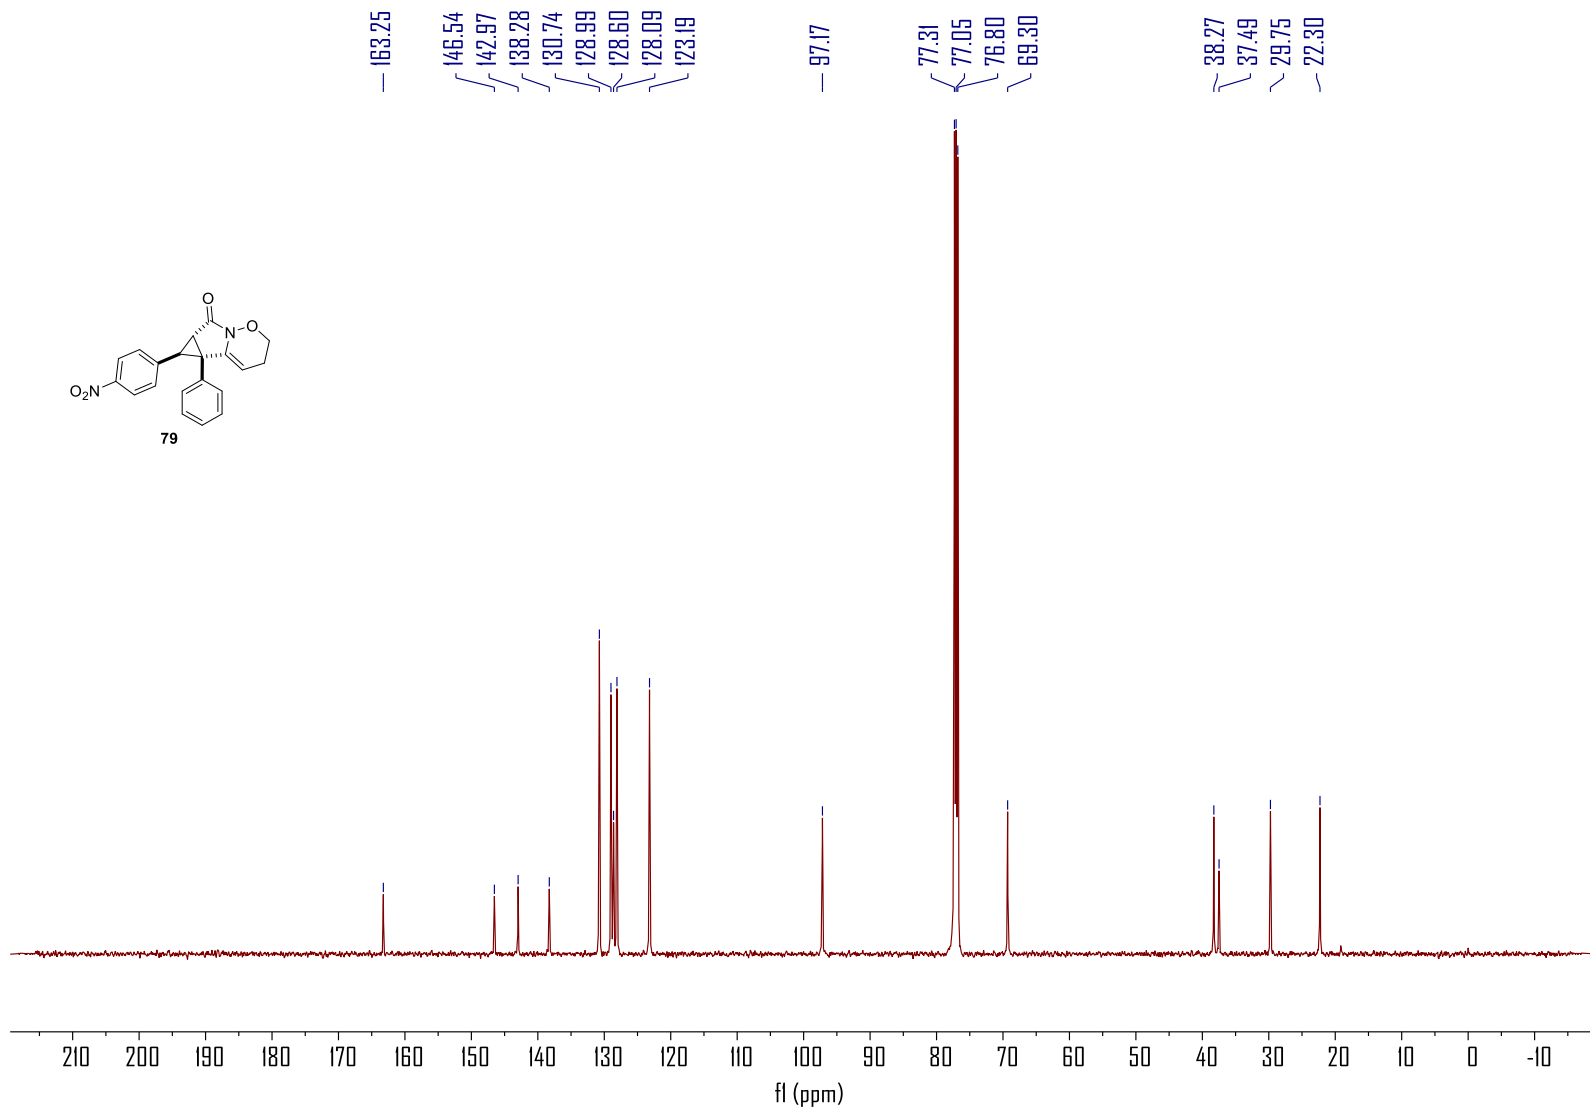

7.33 7.32 7.26 7.25 7.24 7.12 7.12 7.11 7.11 6.86 6.84 4.86 4.85 4.84 4.84 4.36 4.36 4.35 4.35 4.34 4.33 4.33 4.32 4.15 4.14 4.13 4.12 4.12 4.11 4.10 2.91 2.91 2.82 2.81 2.46 2.45 2.44 2.44 2.43 2.43 2.42 2.41 2.19 2.18 2.17 2.15 2.14

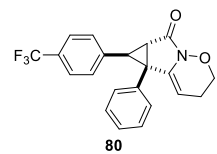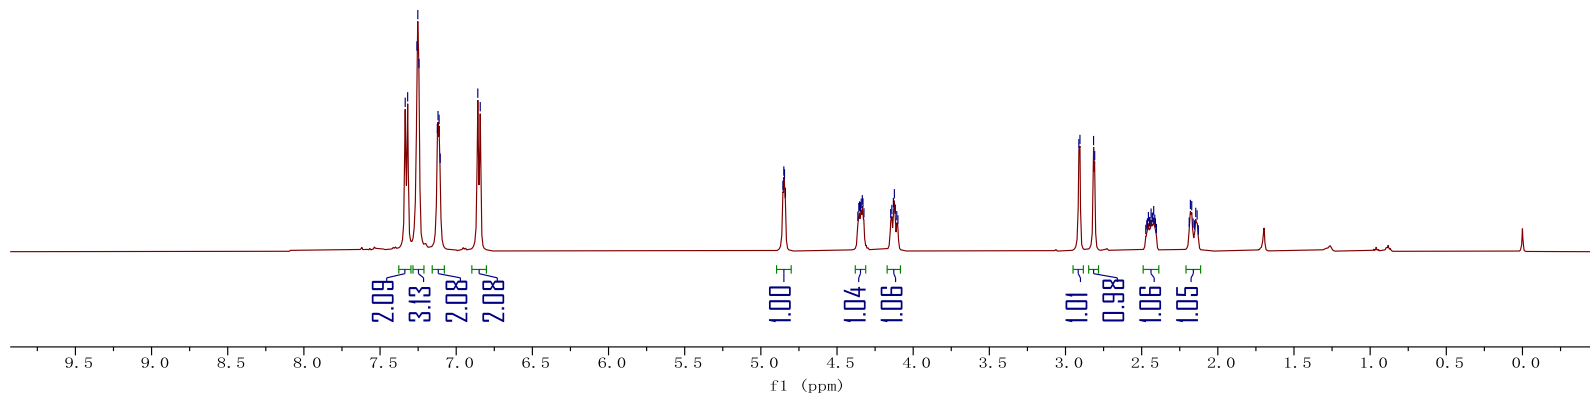

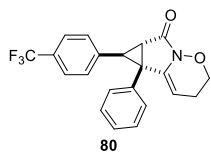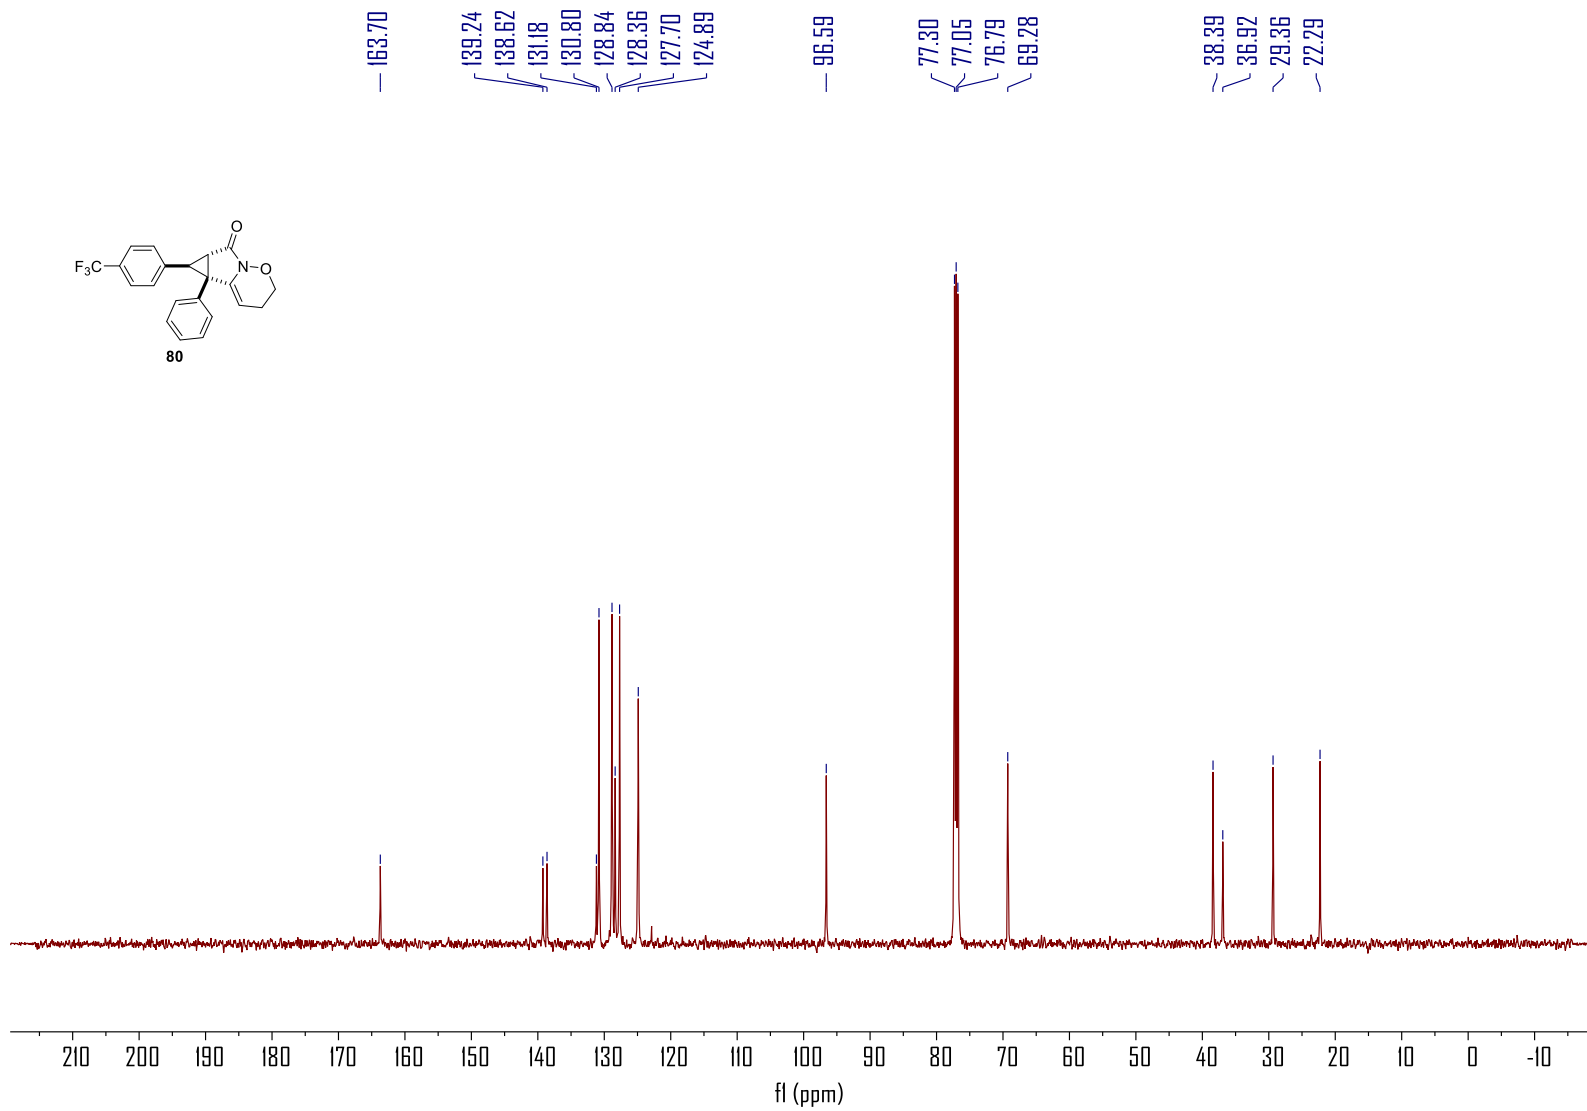

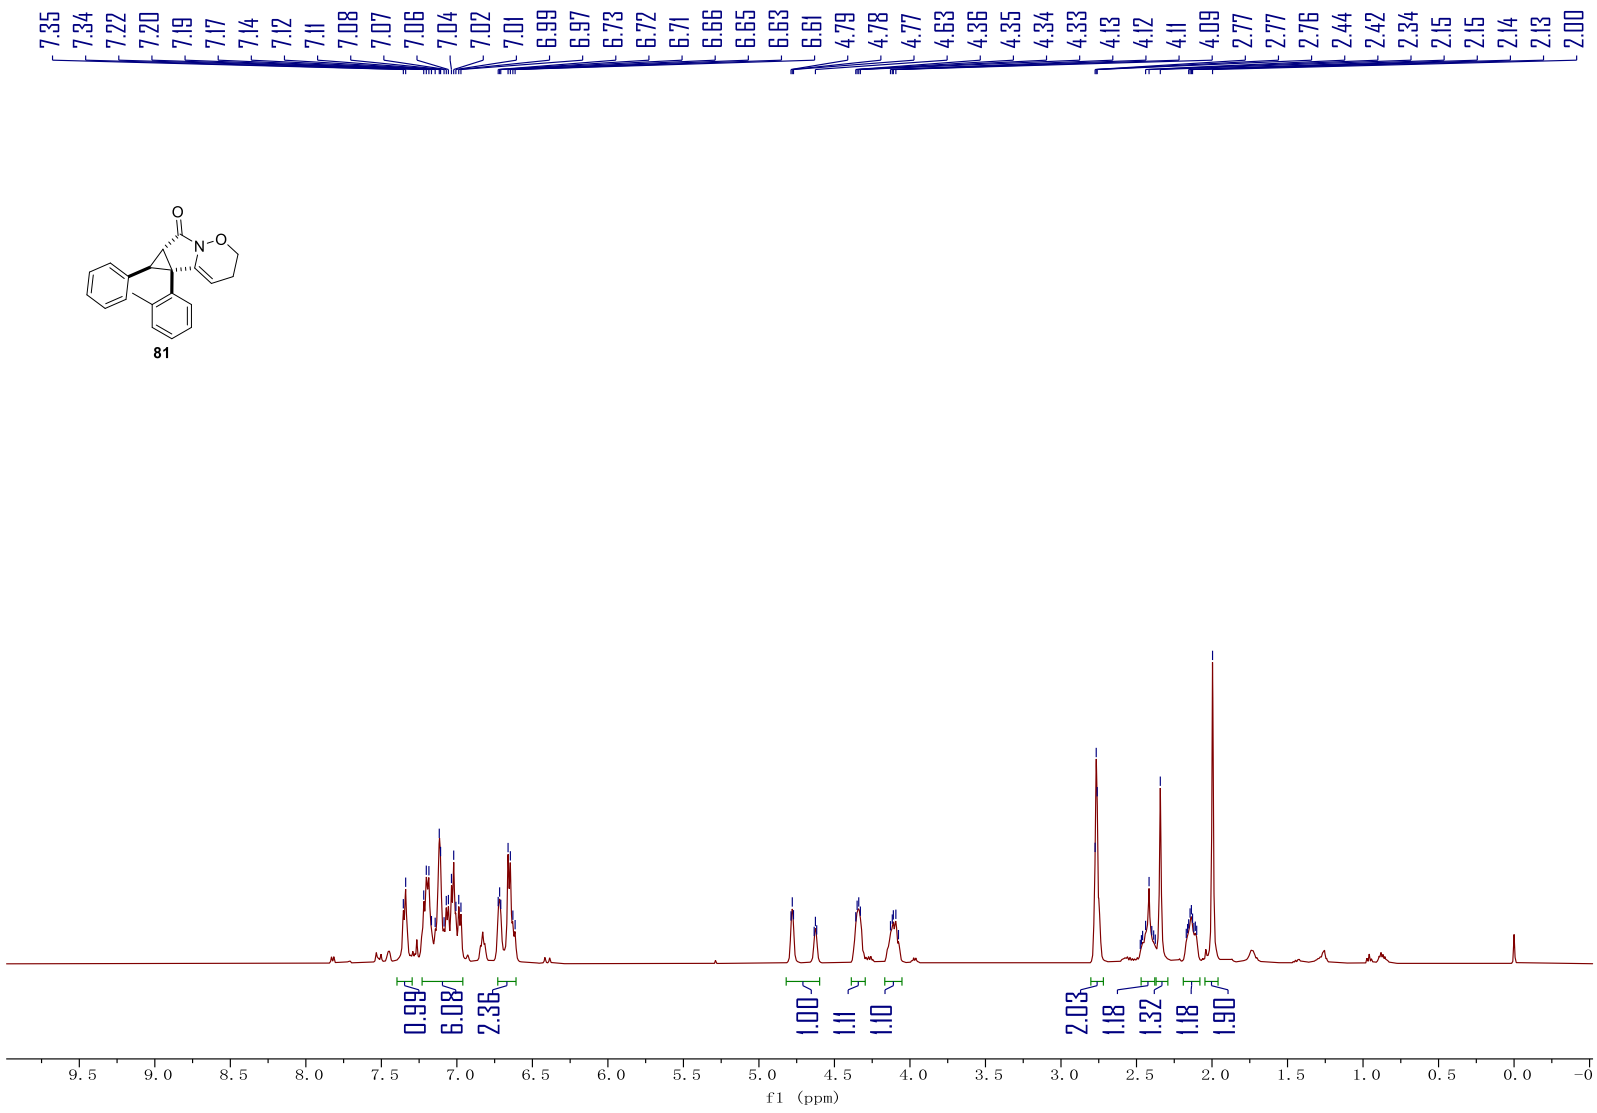

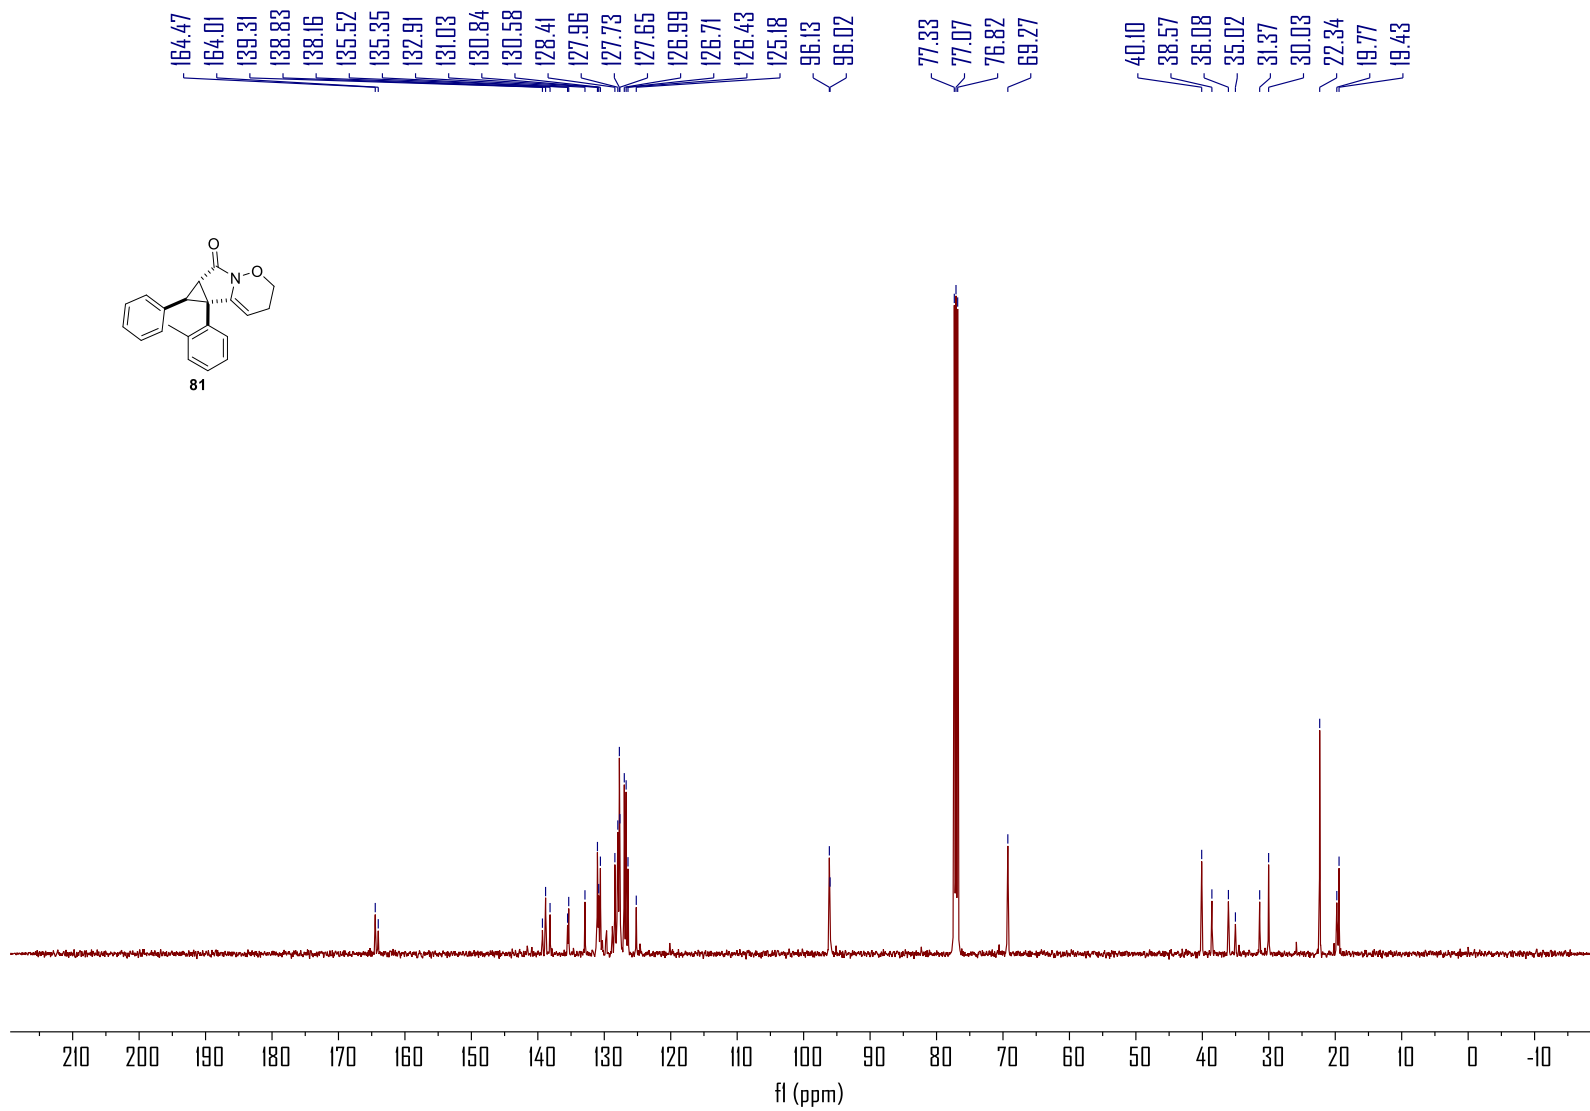

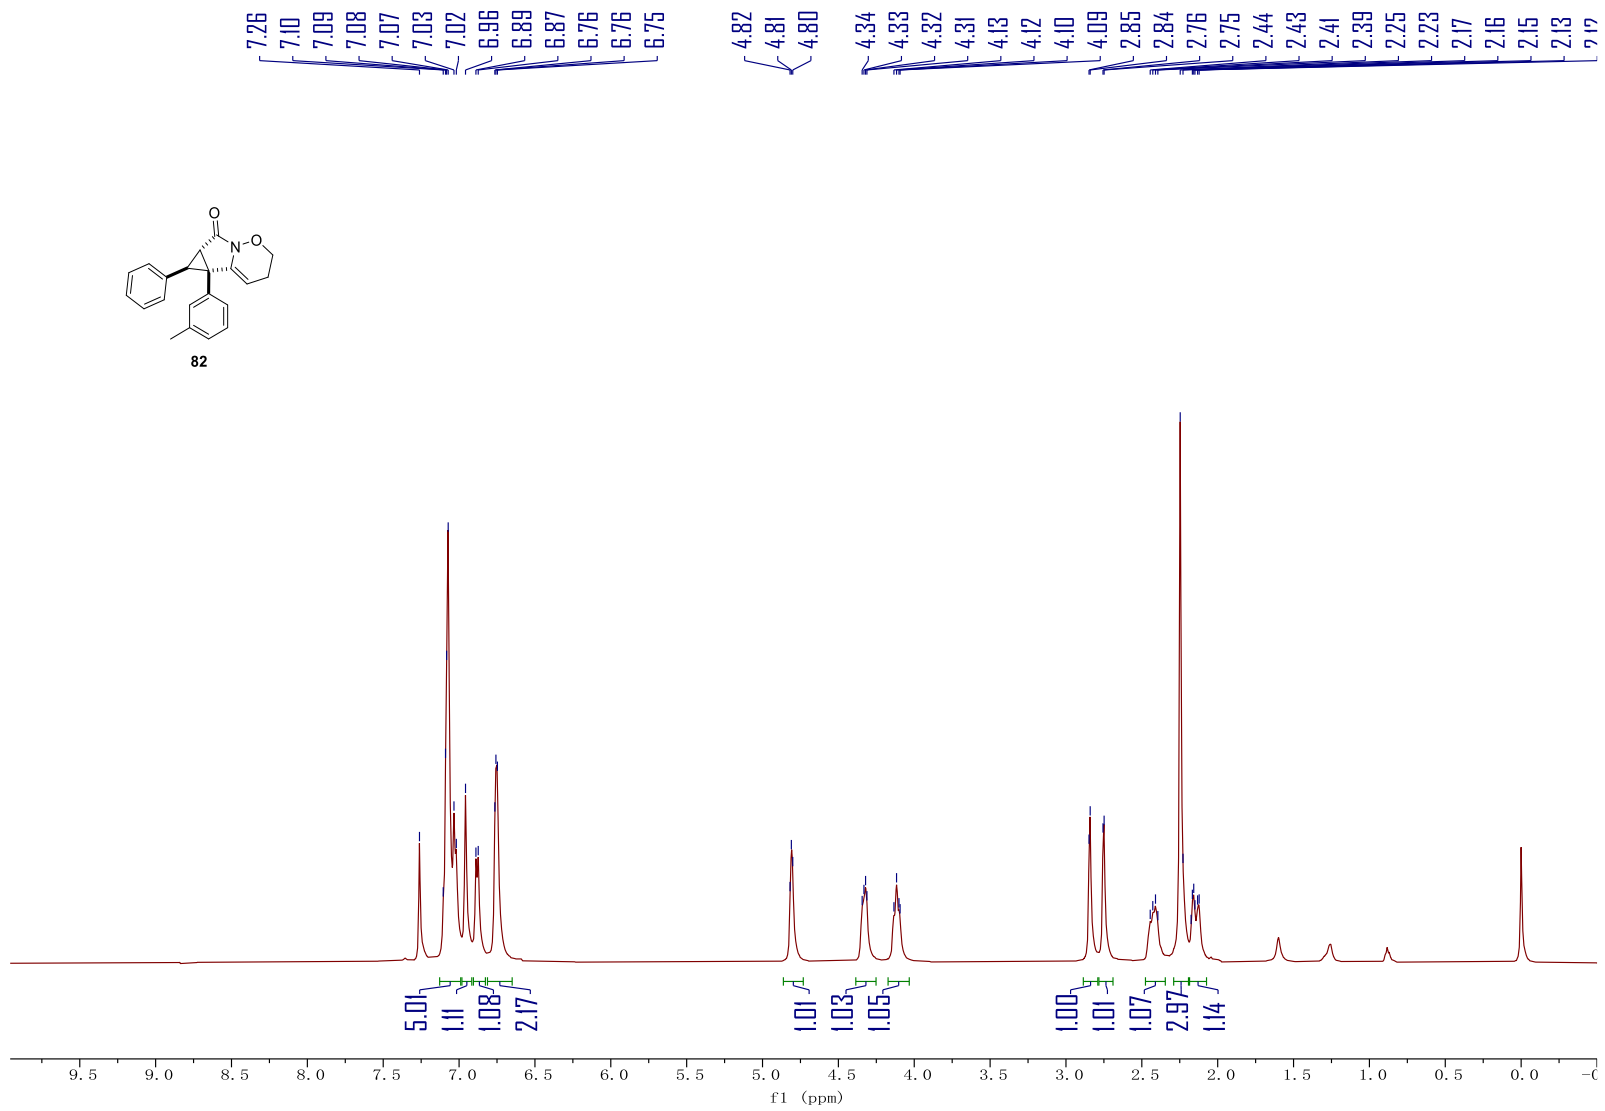

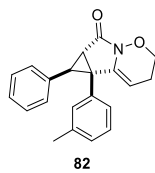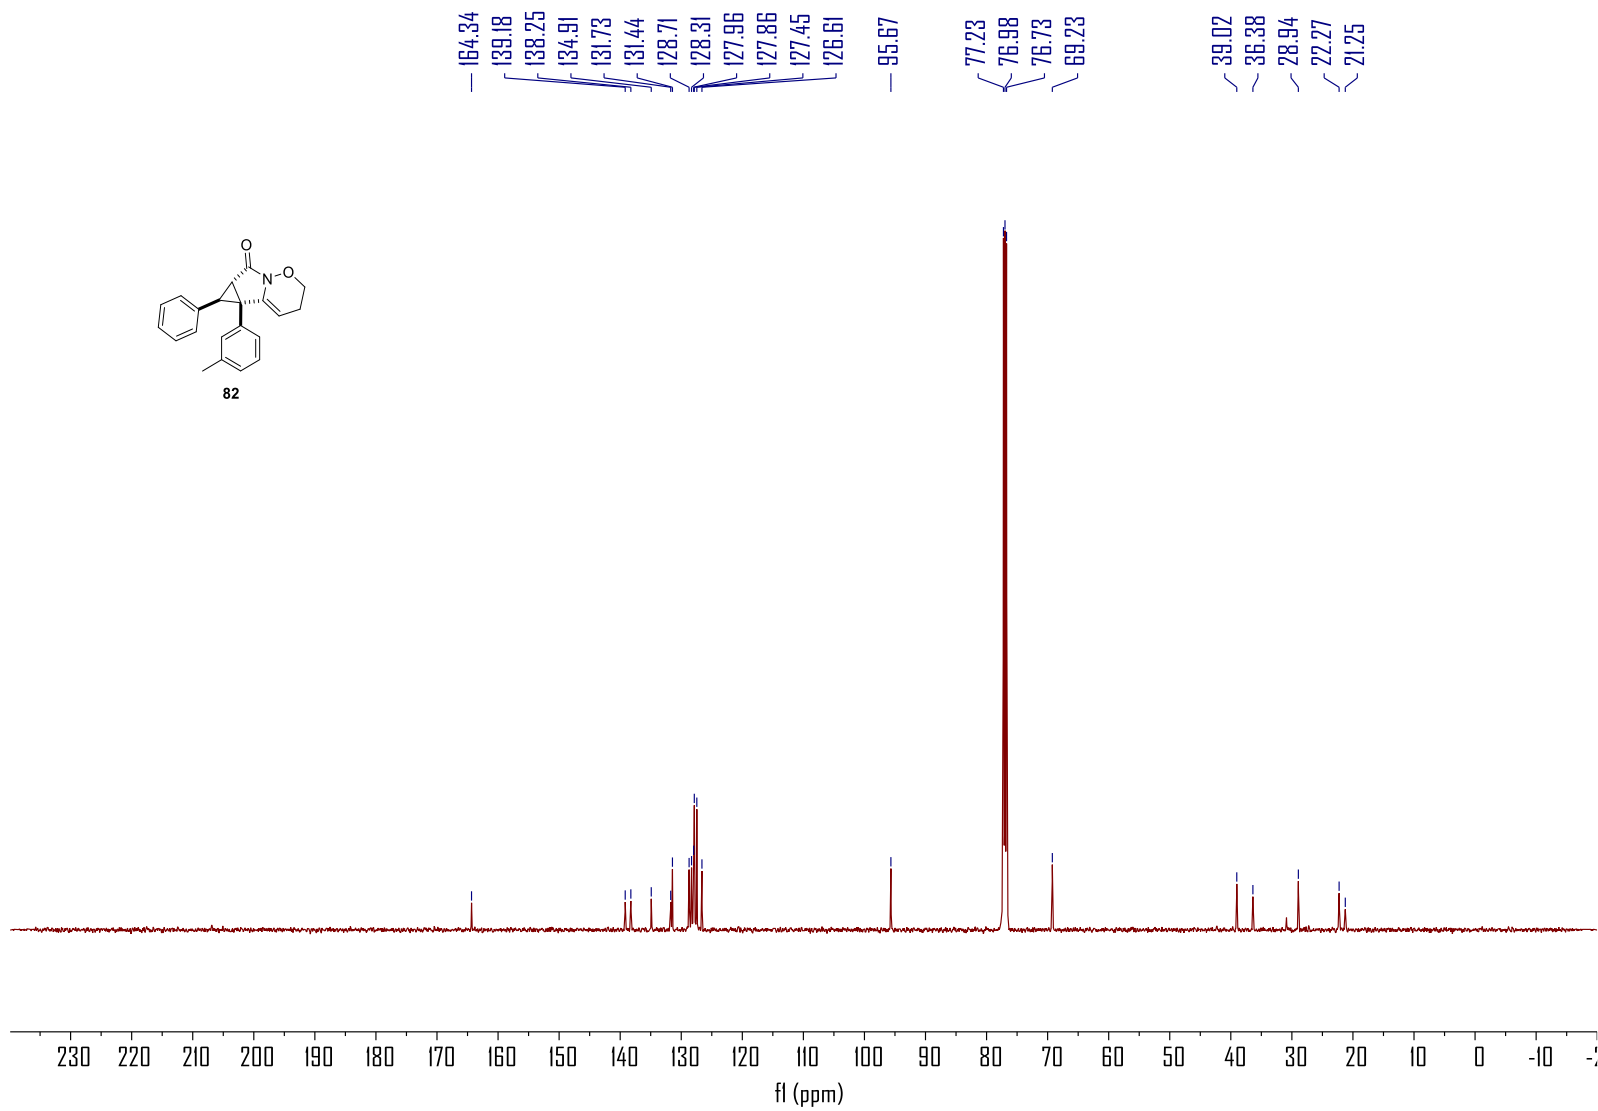



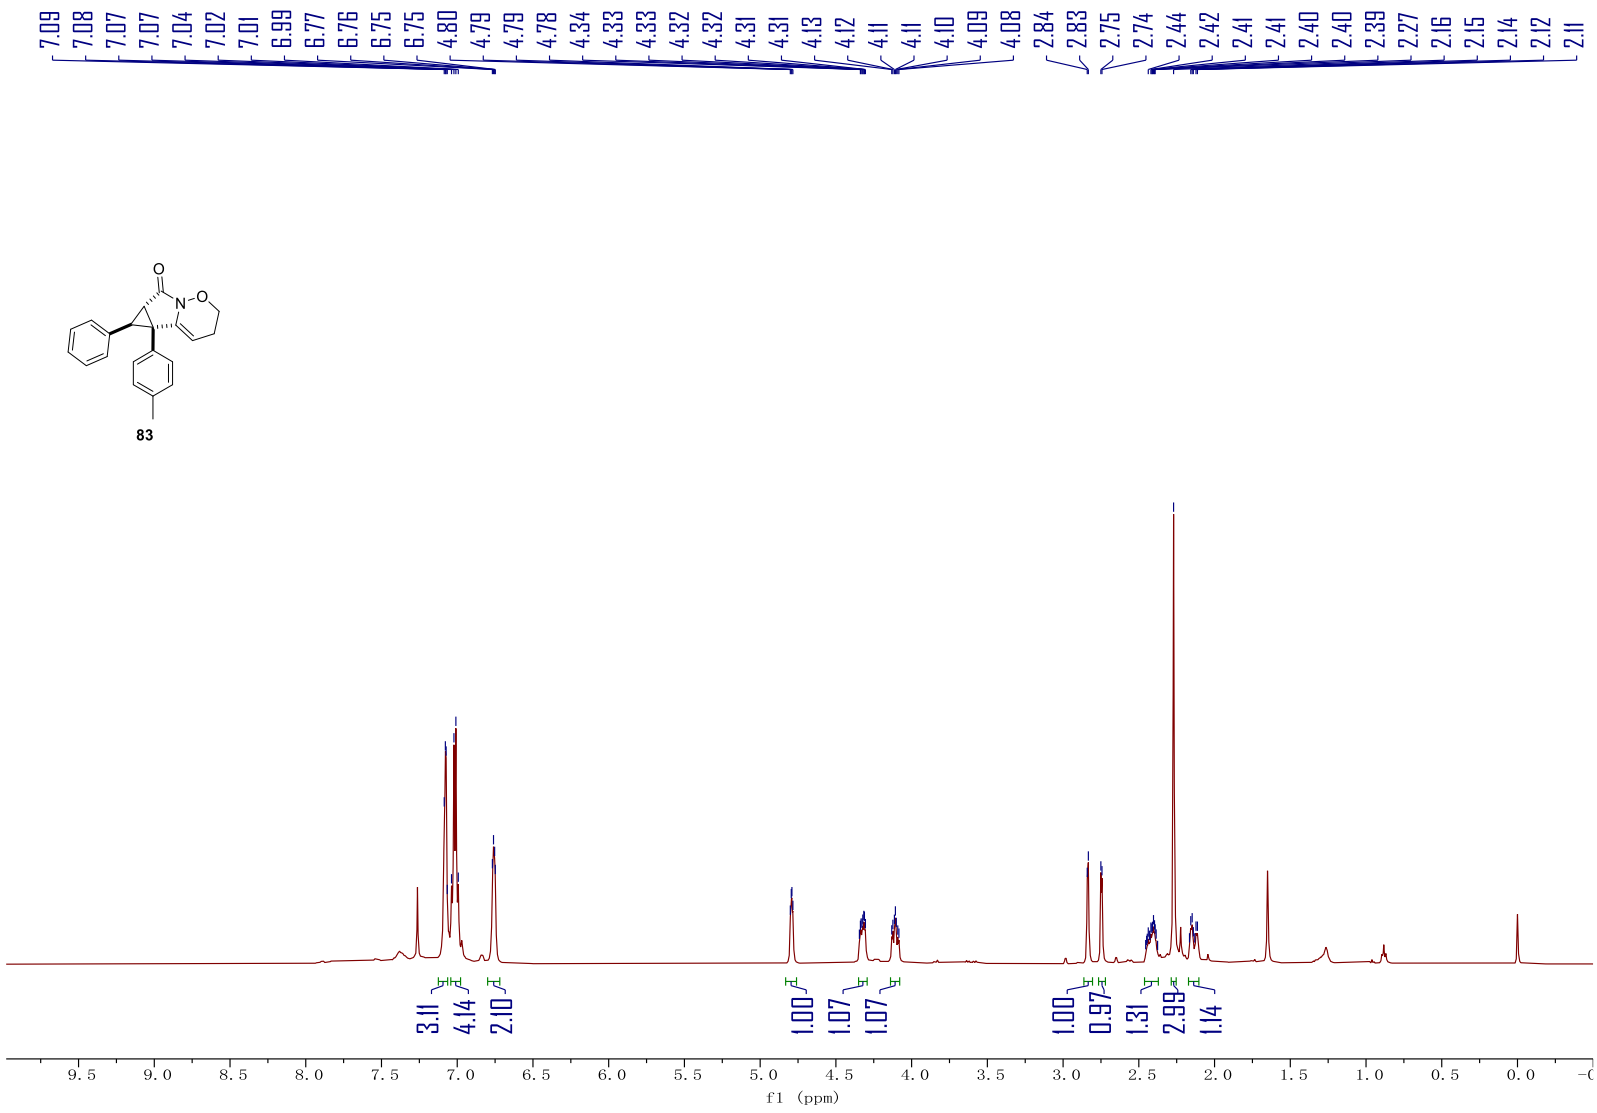

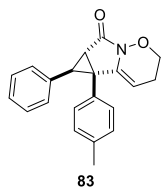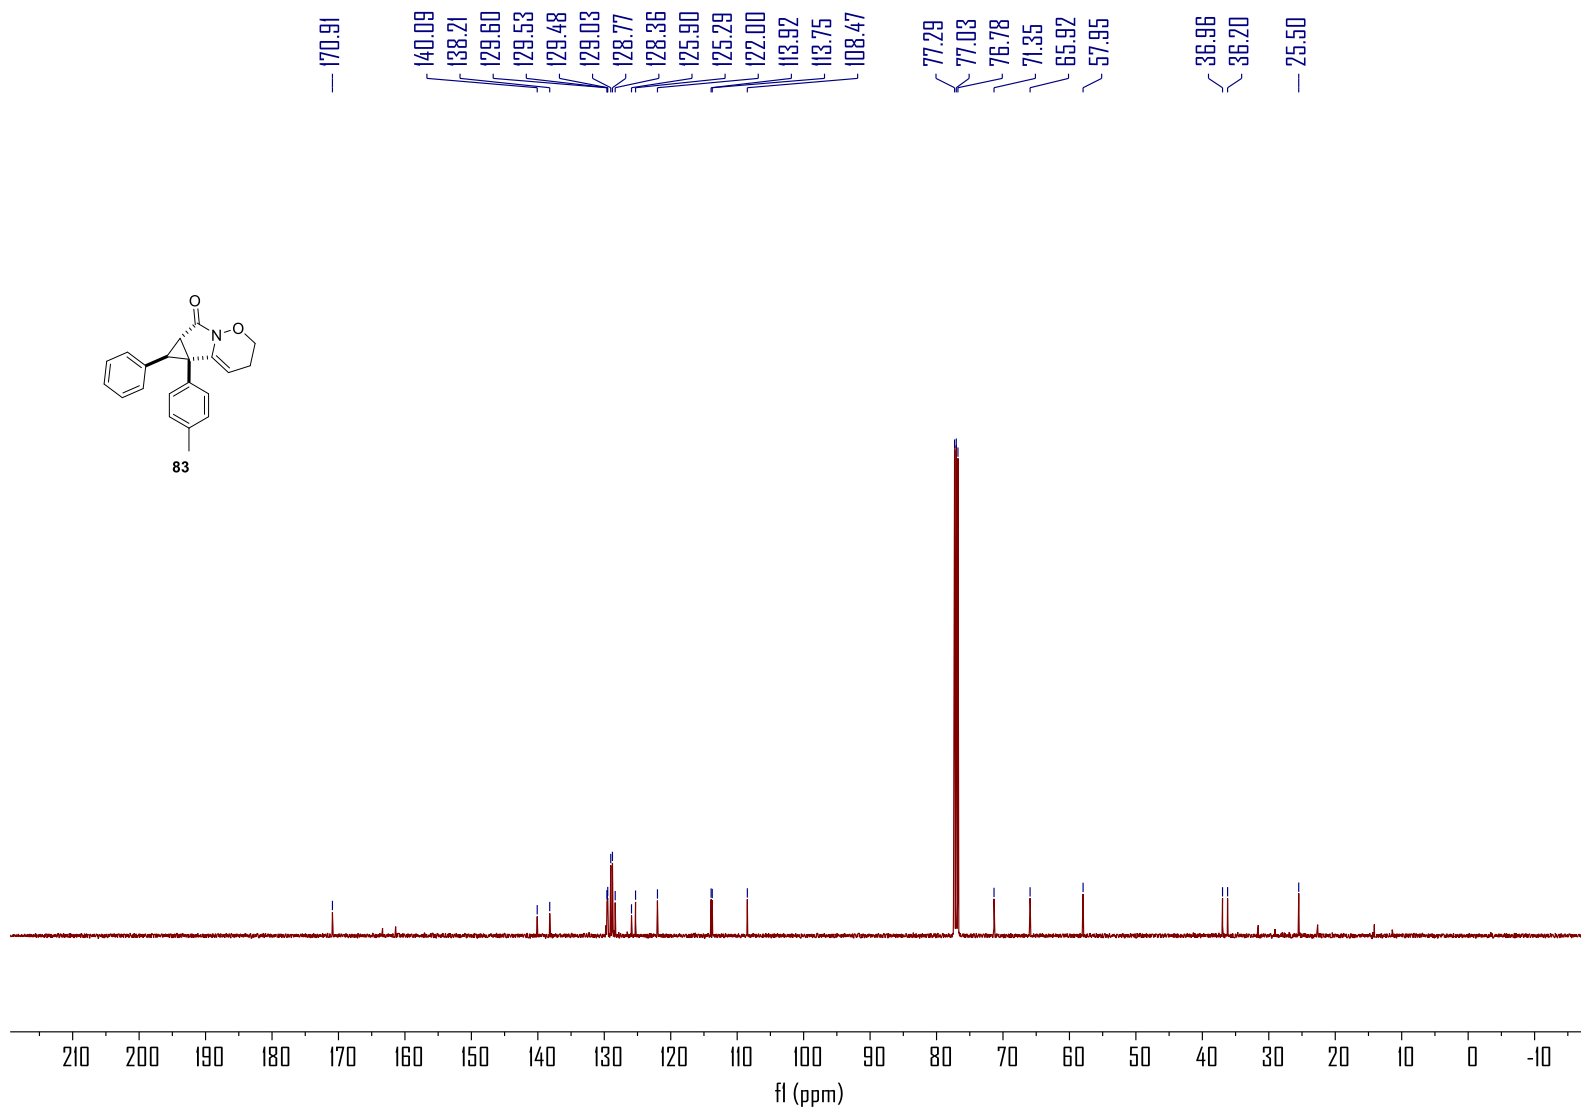

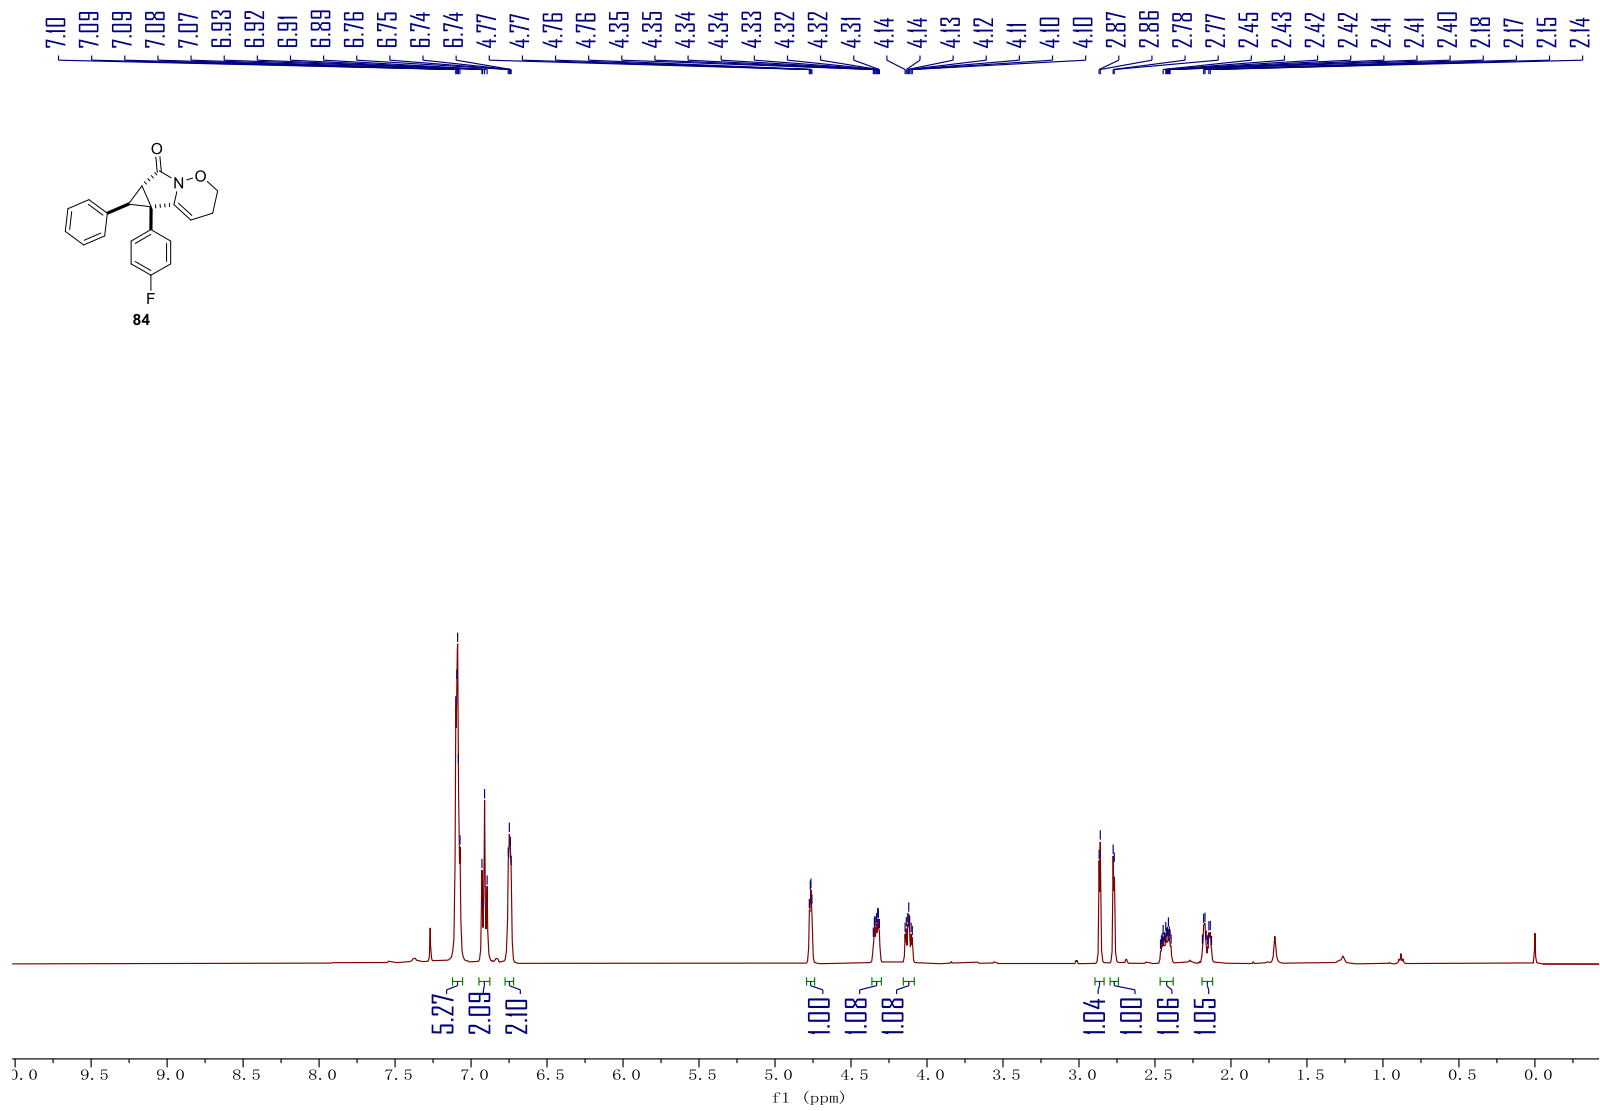

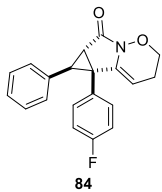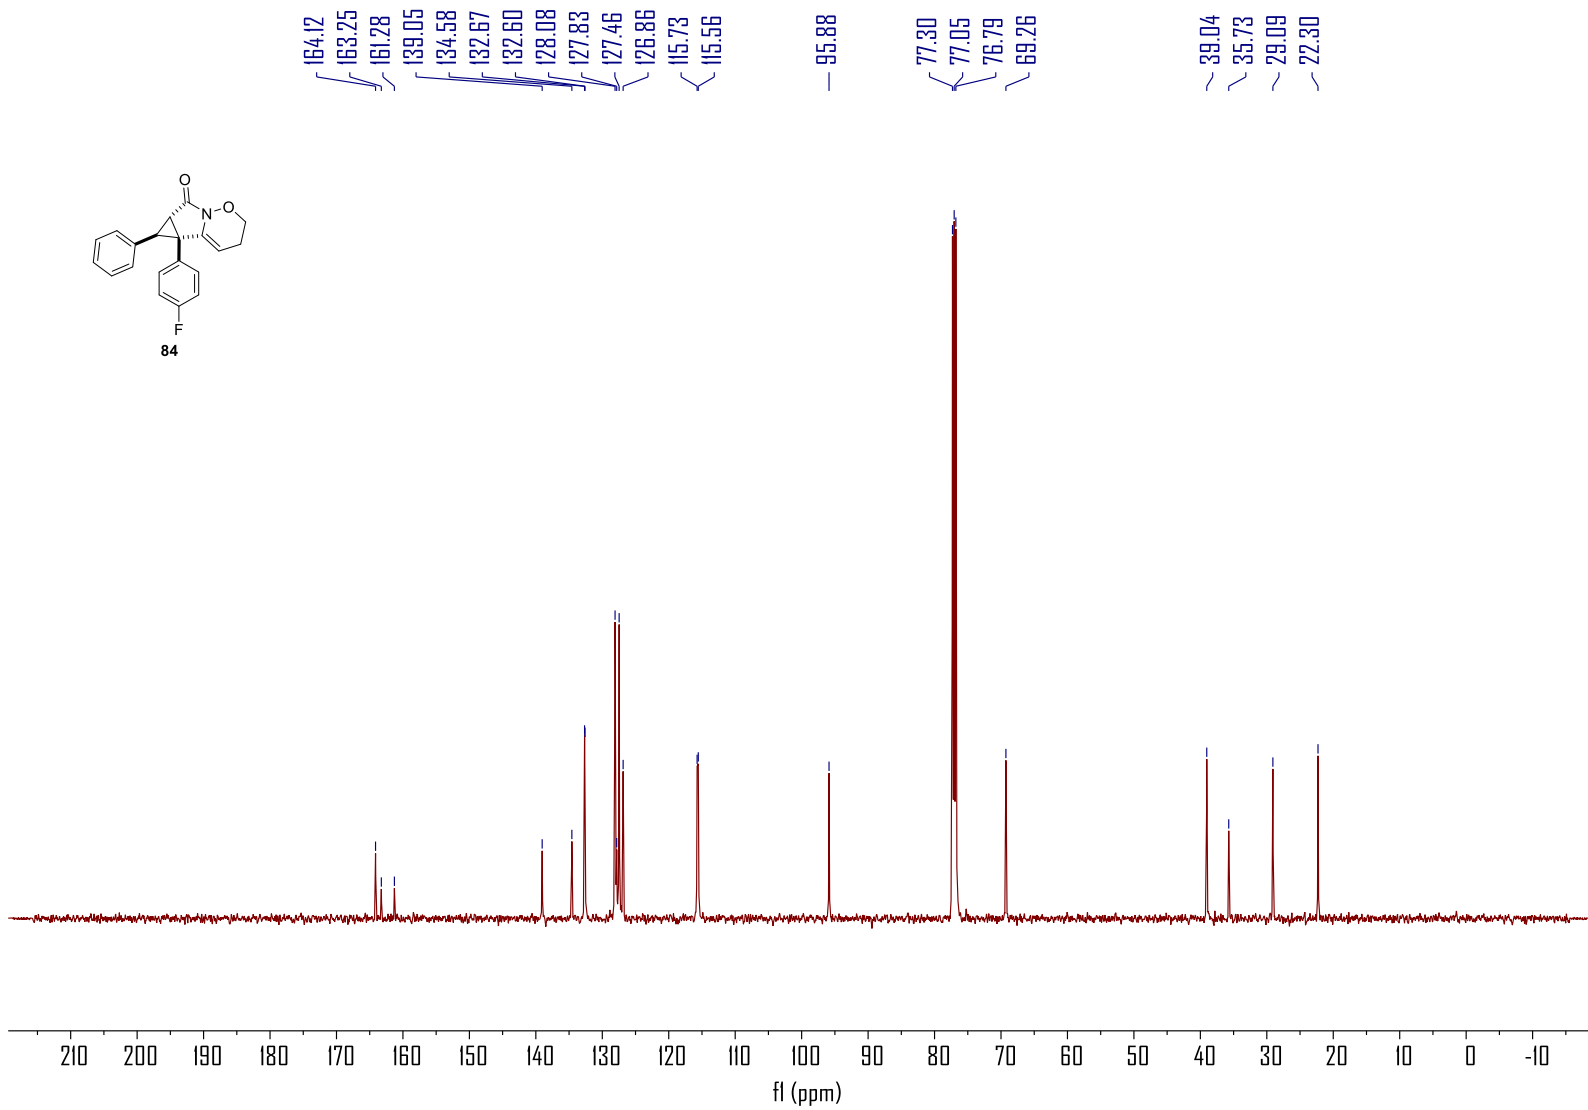

7.37 7.37 7.36 7.35 7.34 7.34 7.12 7.11 7.10 7.00 7.00 6.99 6.98 6.98 6.97 6.77 6.76 6.75 6.75 6.74 4.77 4.76 4.75 4.75 4.35 4.35 4.33 4.32 4.32 4.31 4.15 4.14 4.13 4.12 4.12 4.11 4.10 2.86 2.85 2.79 2.78 2.43 2.41 2.18 2.18 2.18 2.17

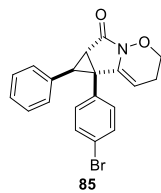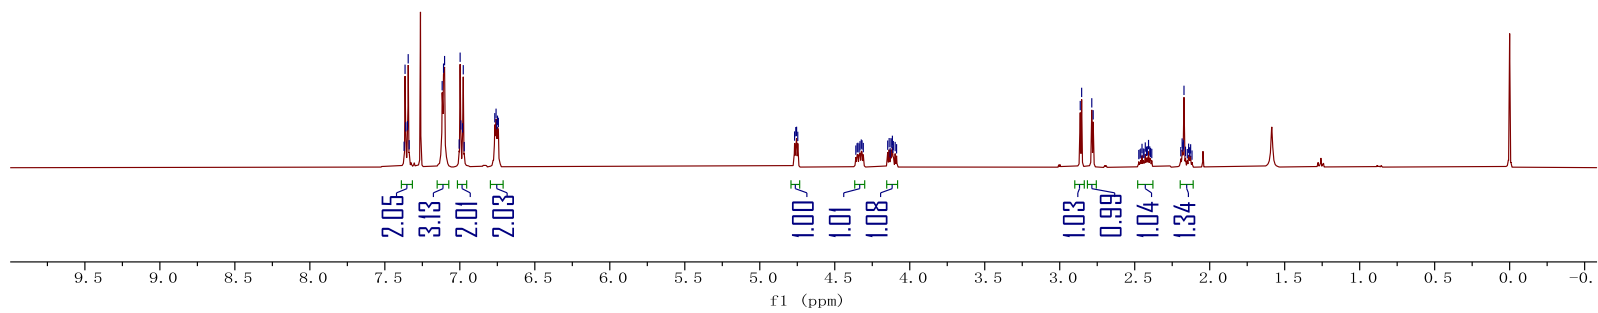

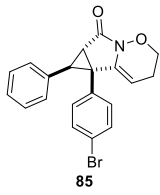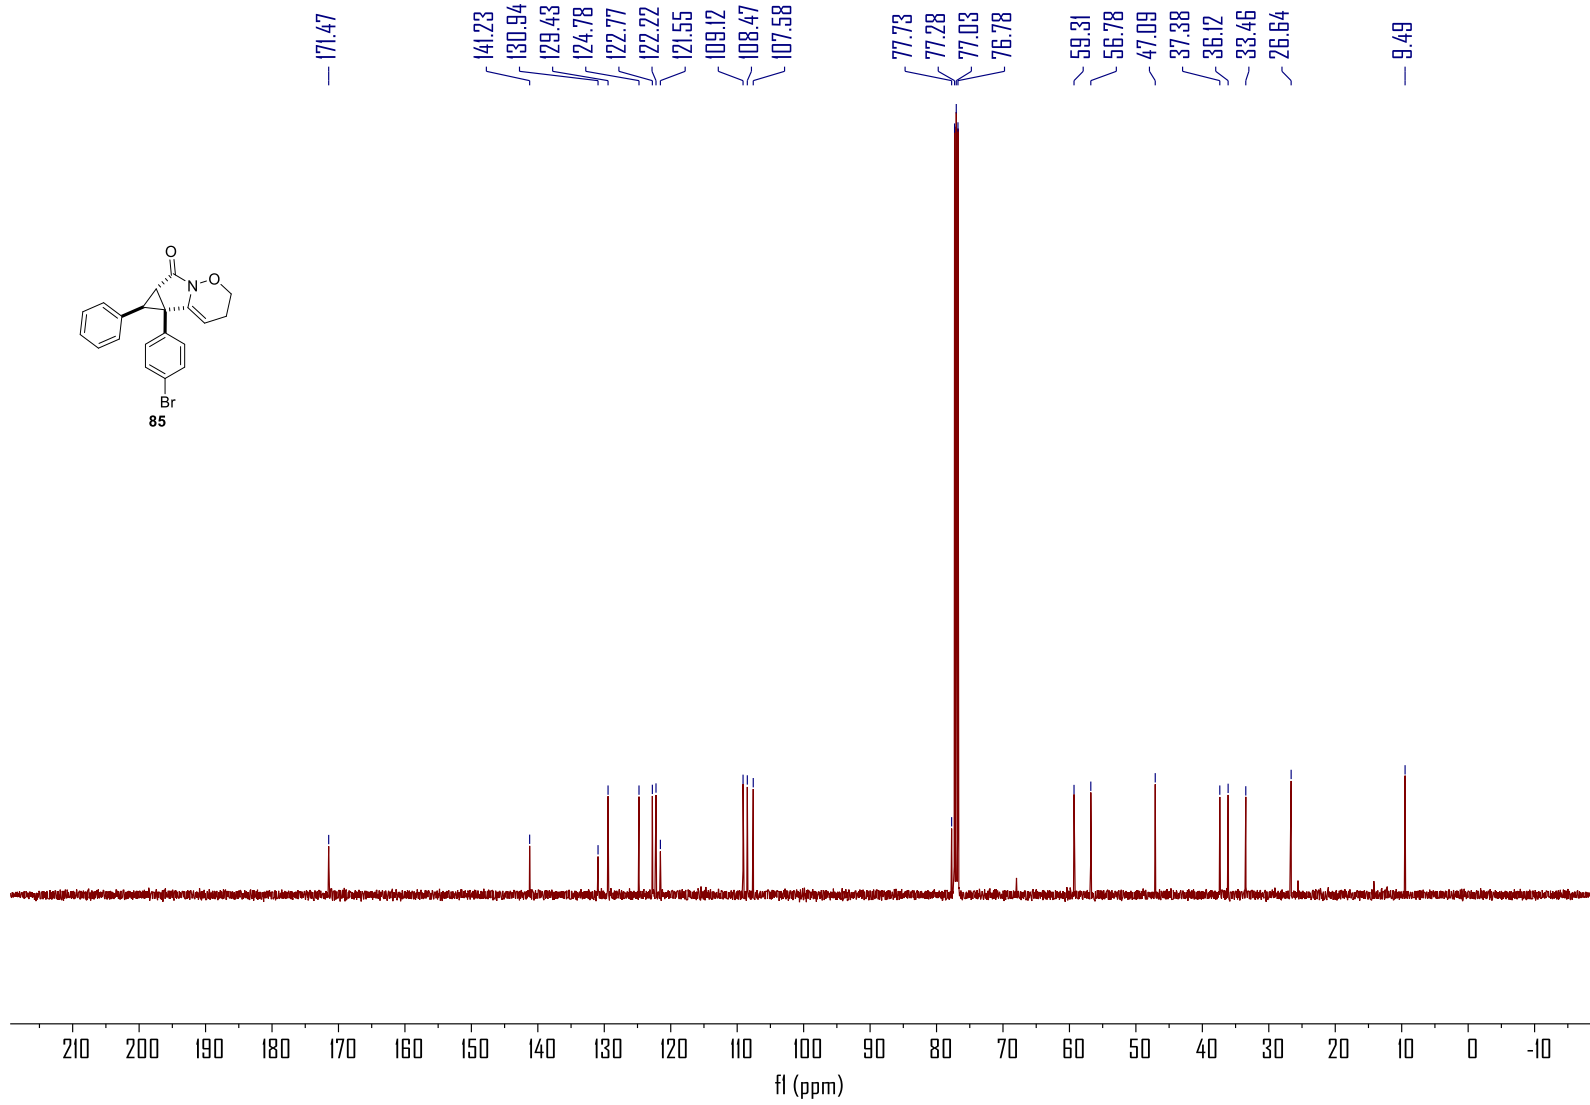

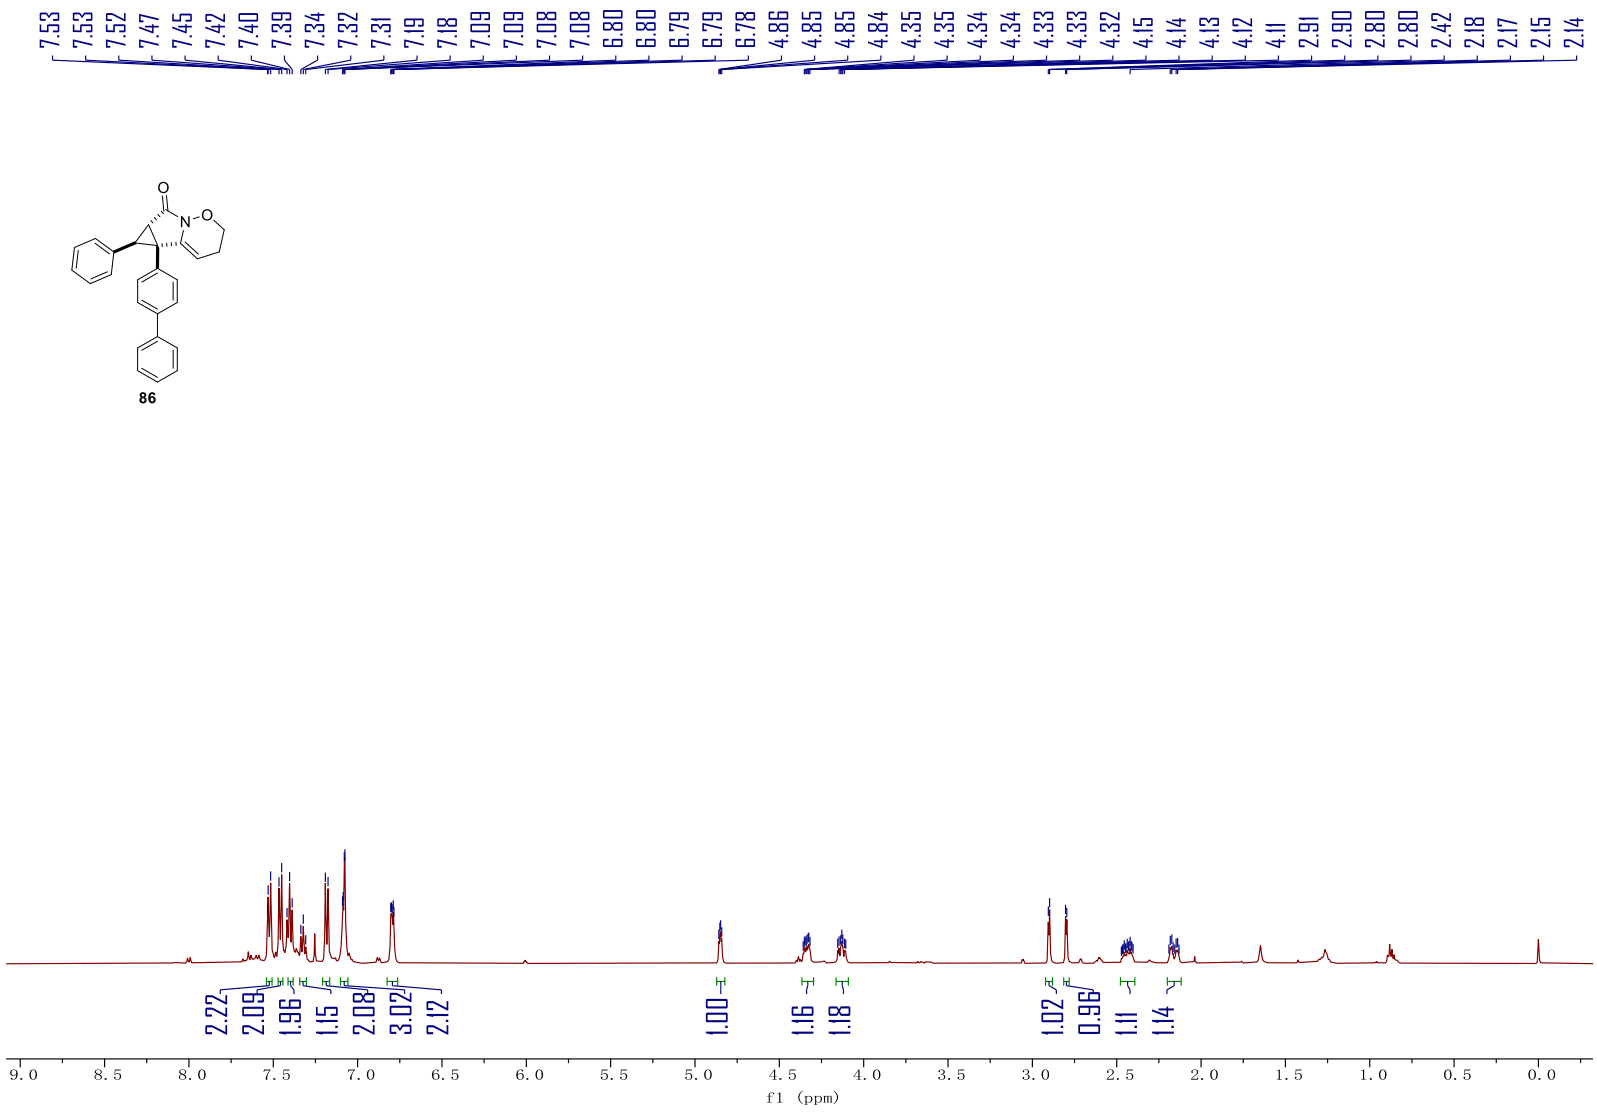

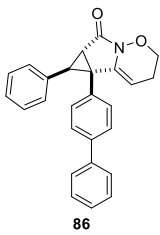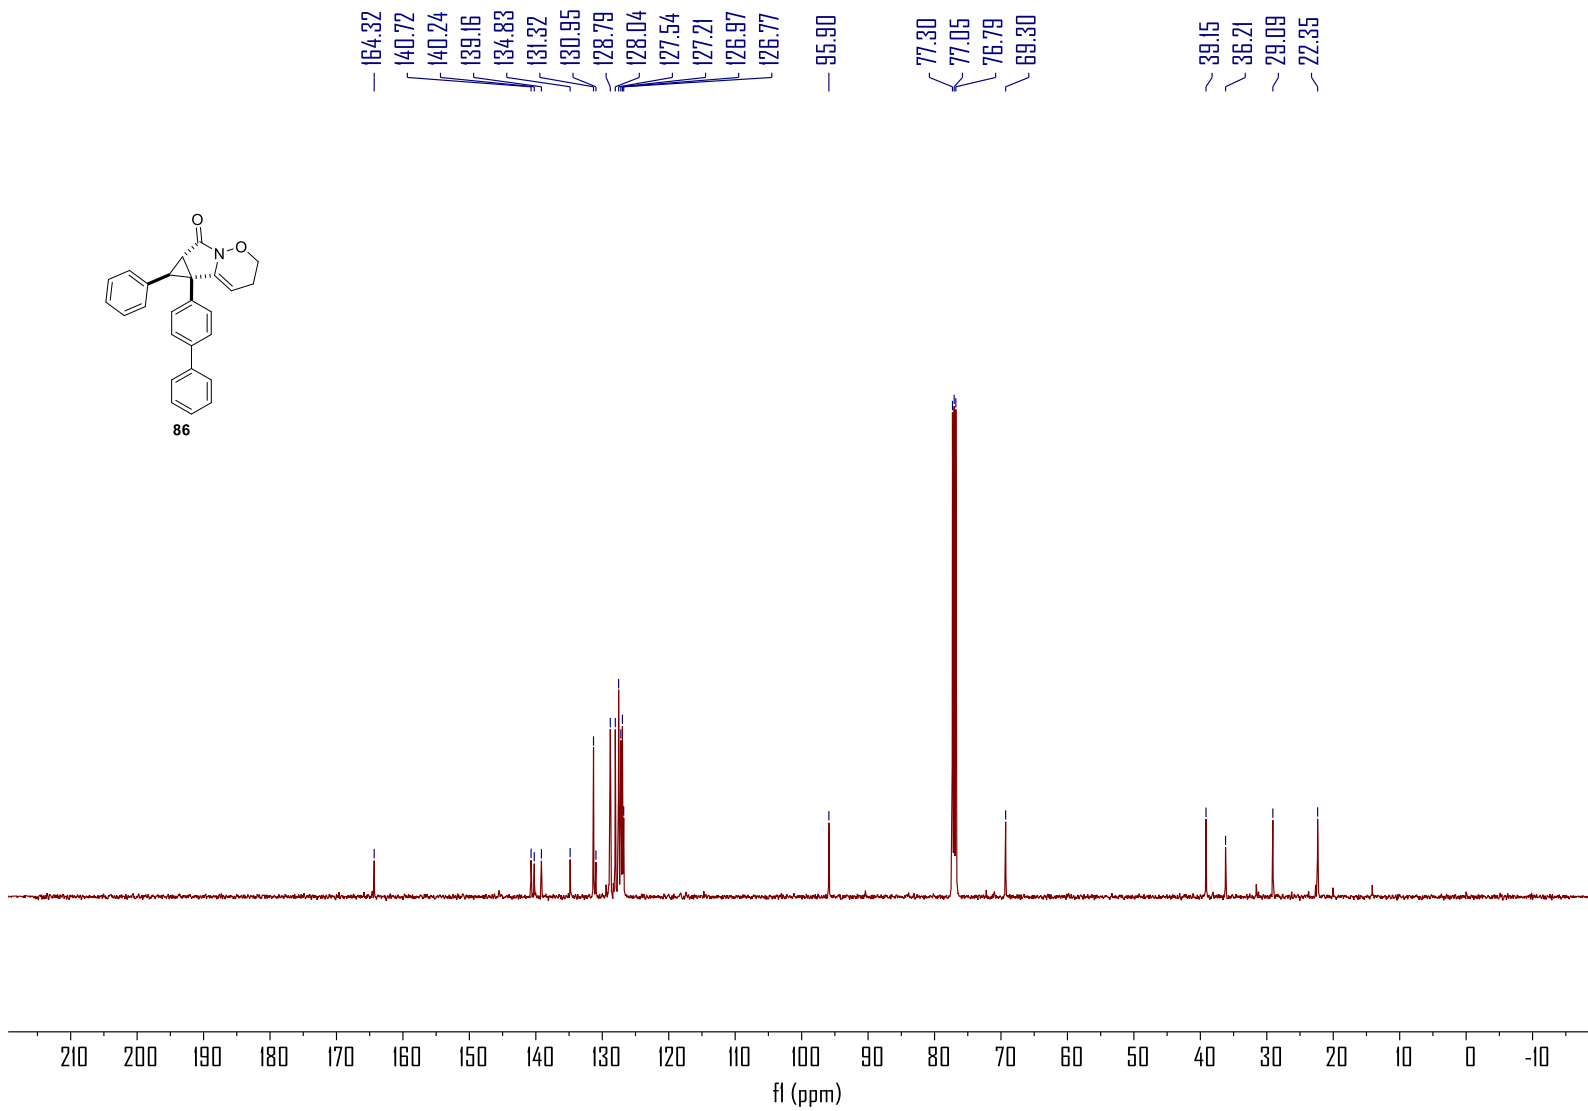



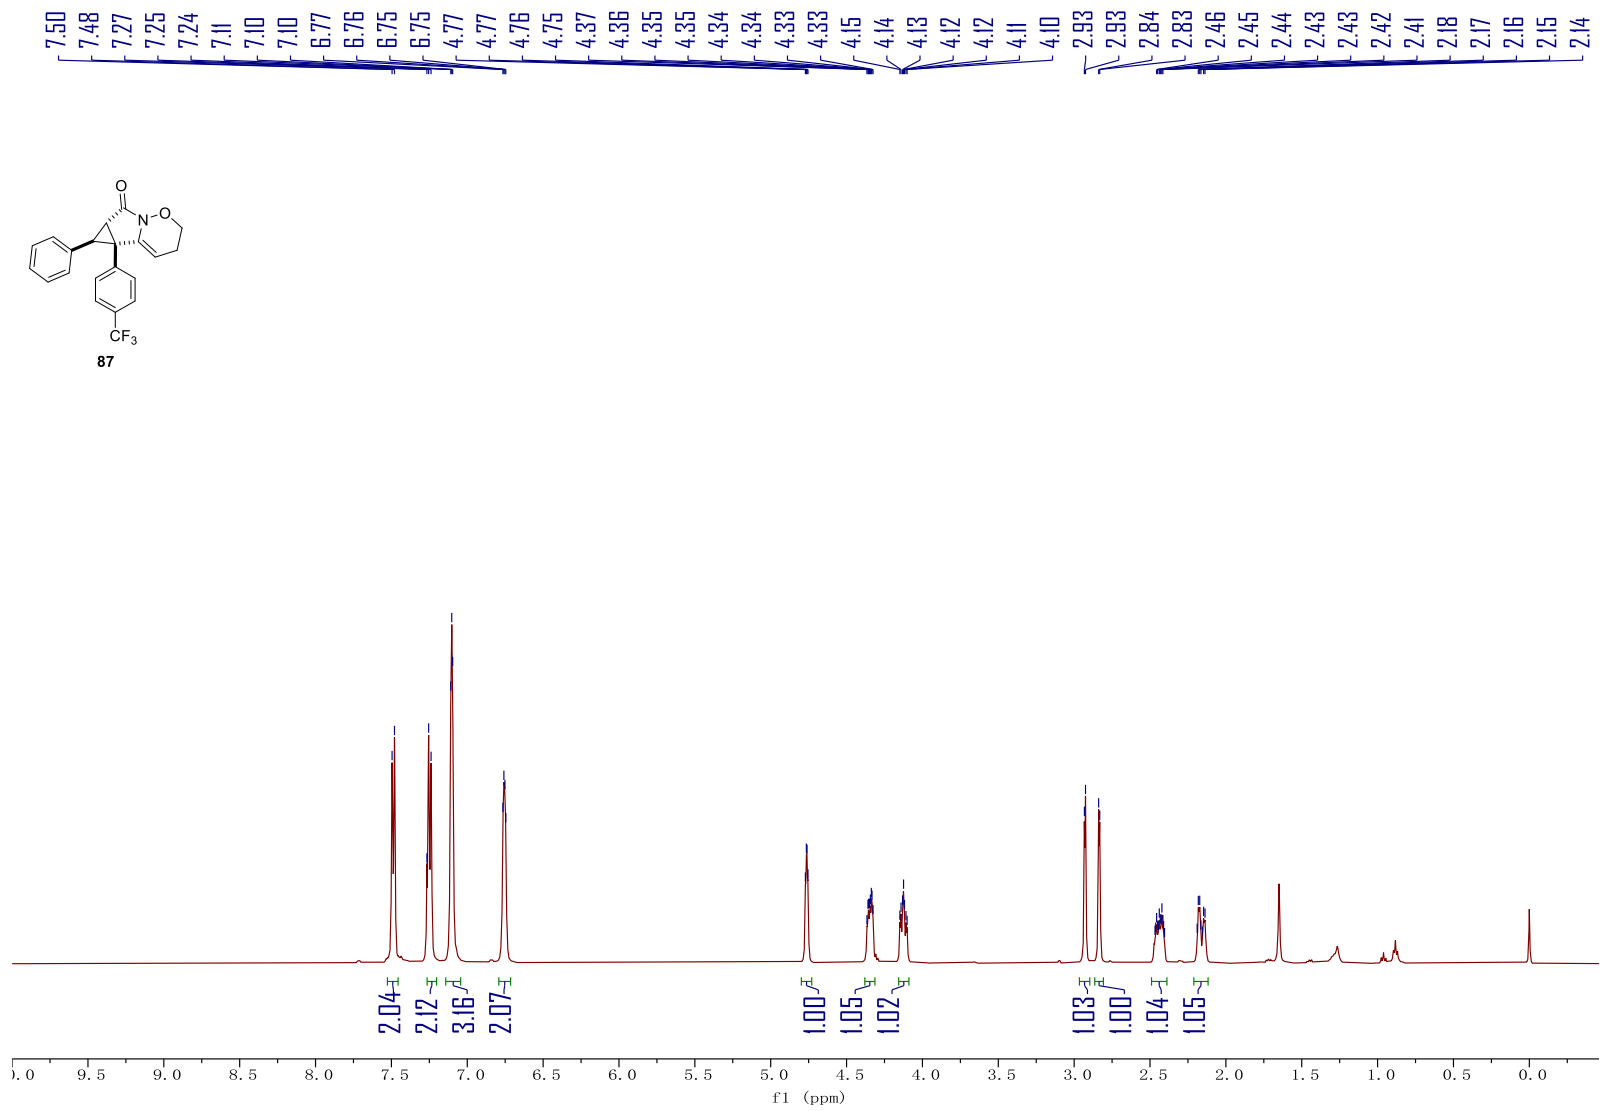

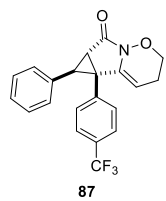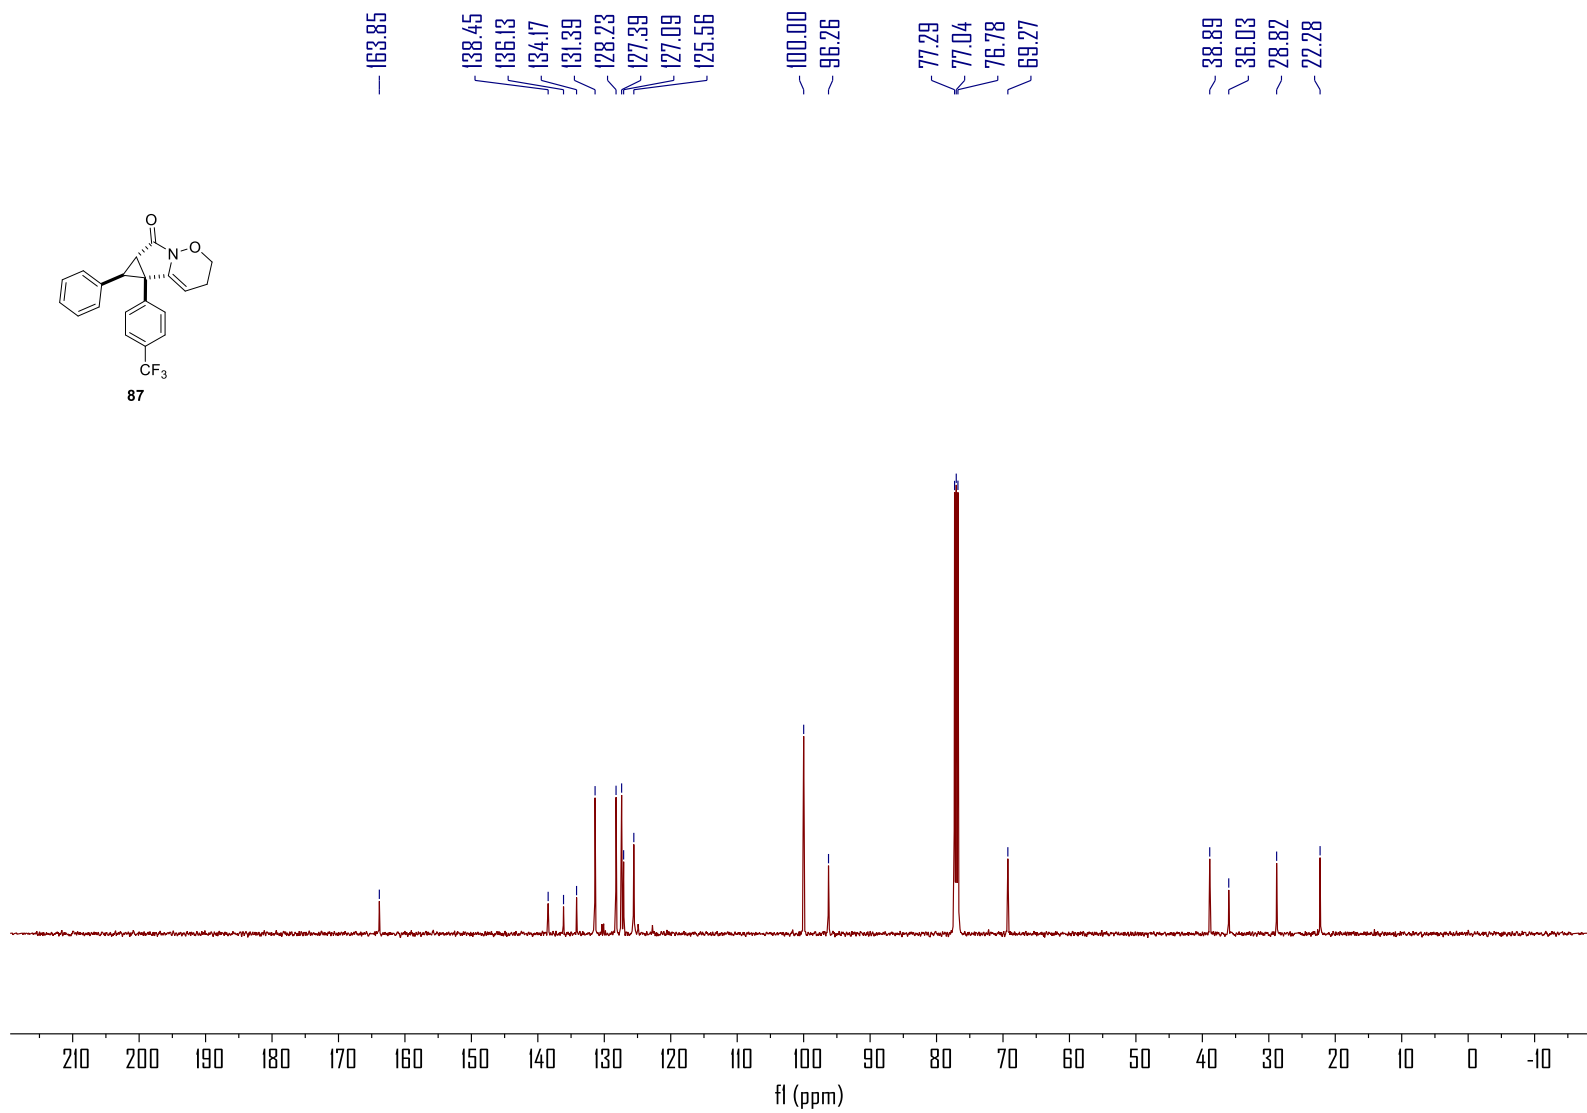

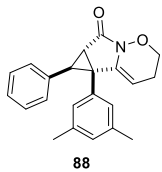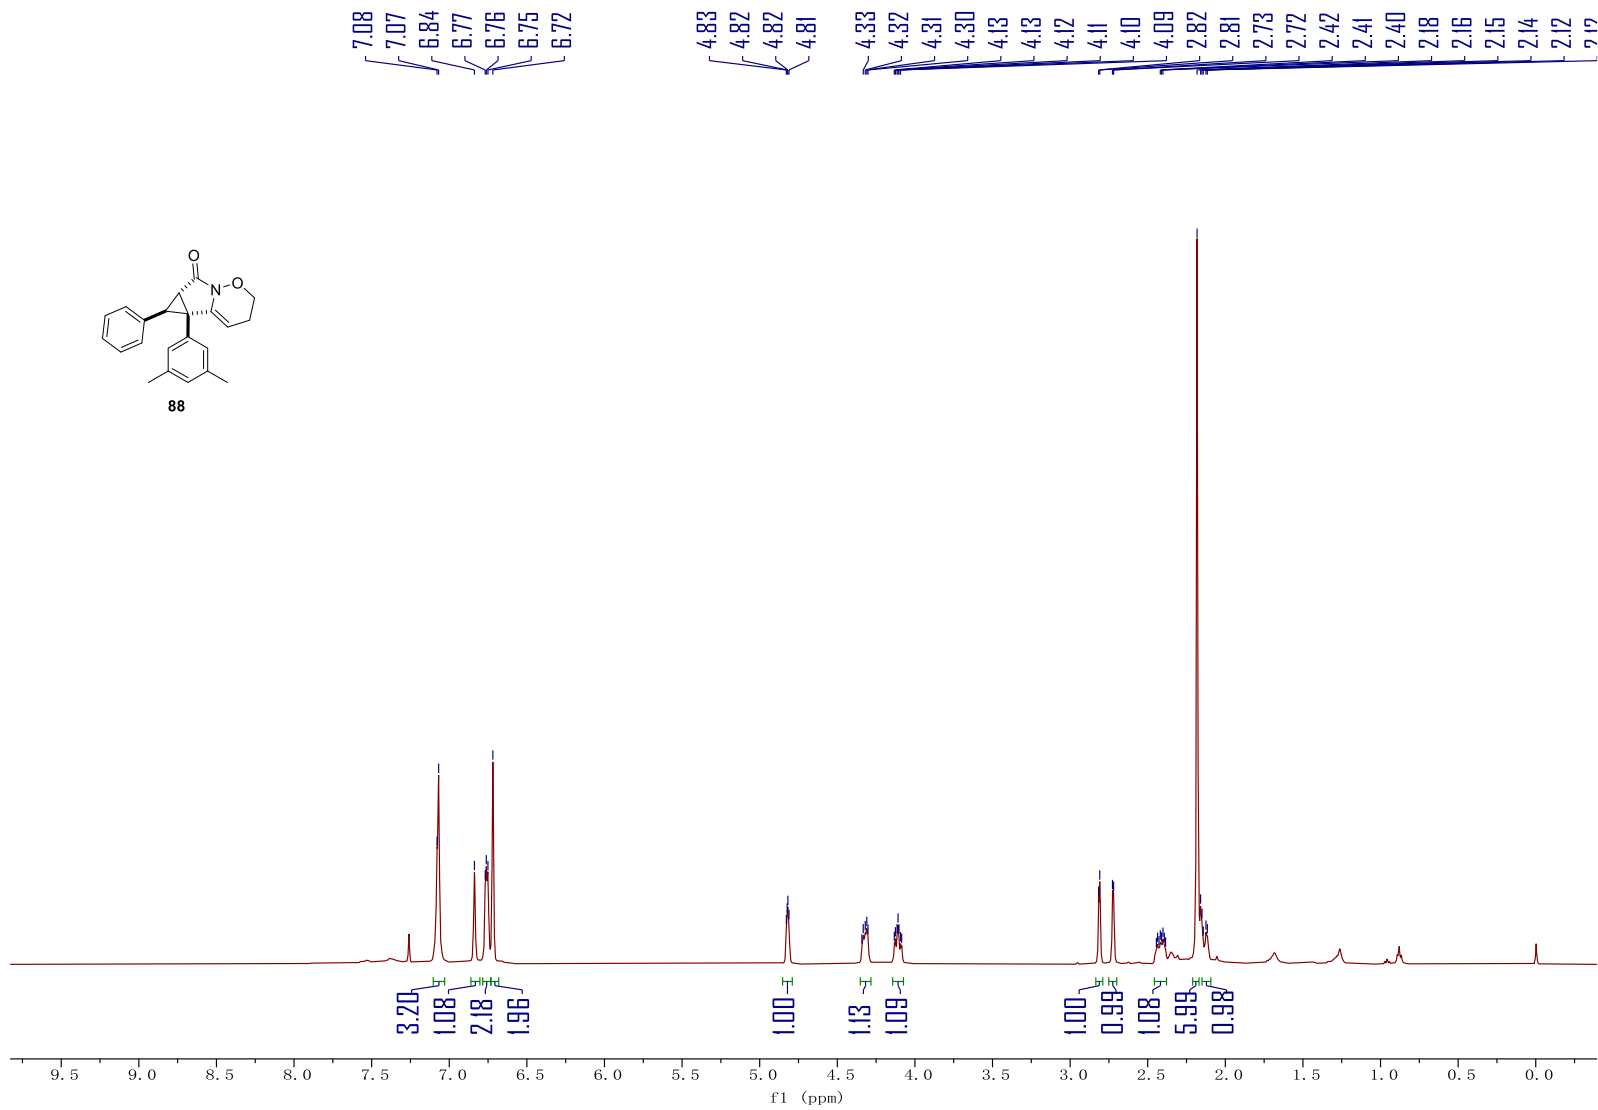

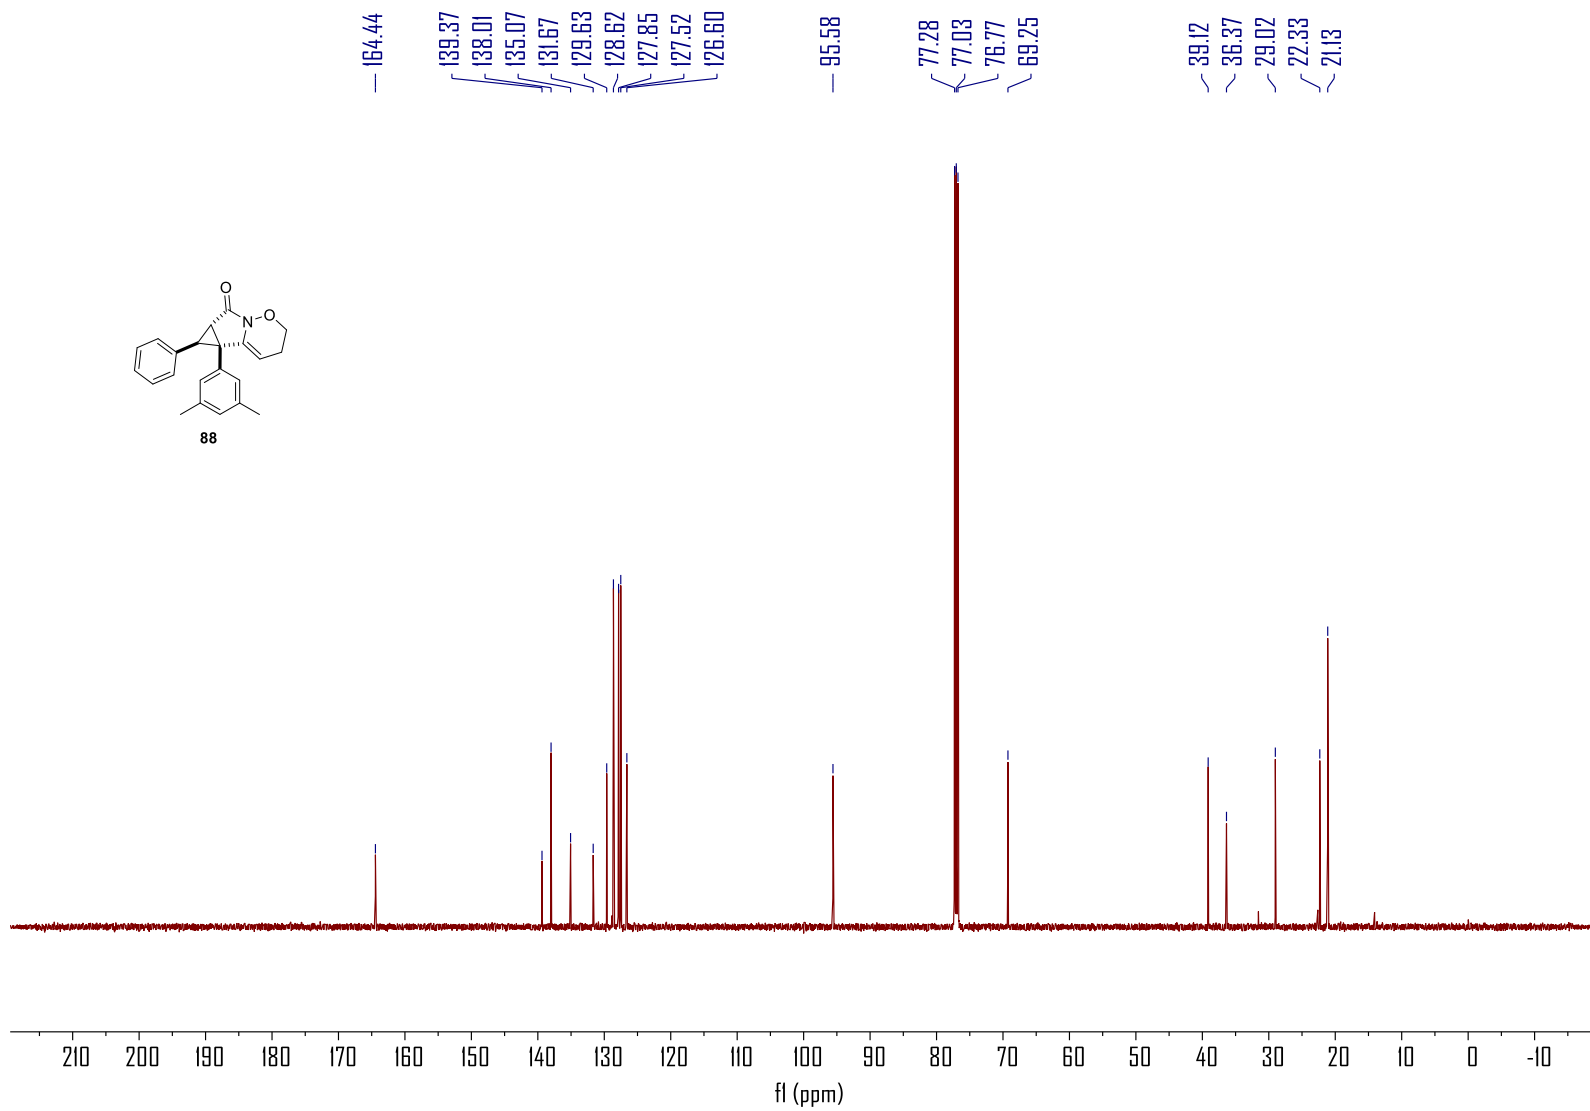

7.72  
7.52  
7.27  
7.14  
7.13  
7.12  
6.78  
6.77  
6.77  
6.76  
4.75  
4.74  
4.73  
4.73  
4.39  
4.39  
4.38  
4.37  
4.37  
4.36  
4.36  
4.35  
4.19  
4.18  
4.17  
4.16  
4.16  
4.15  
4.14  
3.02  
3.01  
2.93  
2.92  
2.48  
2.47  
2.46  
2.46  
2.45  
2.44  
2.44  
2.43  
2.23  
2.22  
2.21  
2.20  
2.18  
2.17

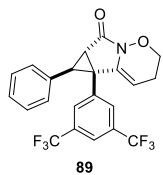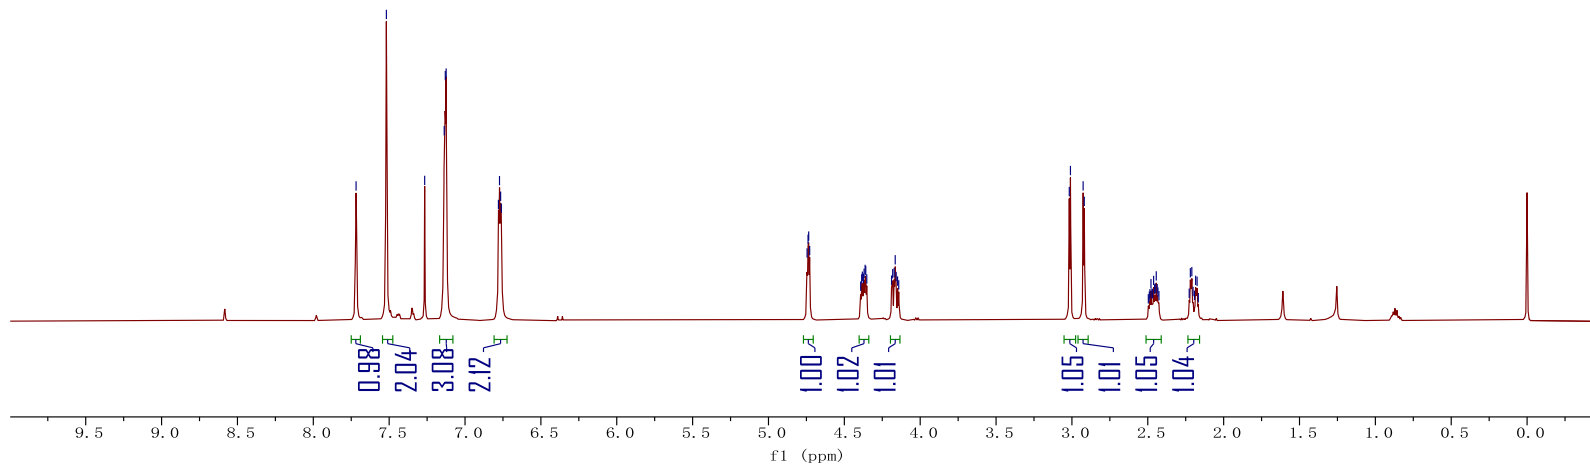

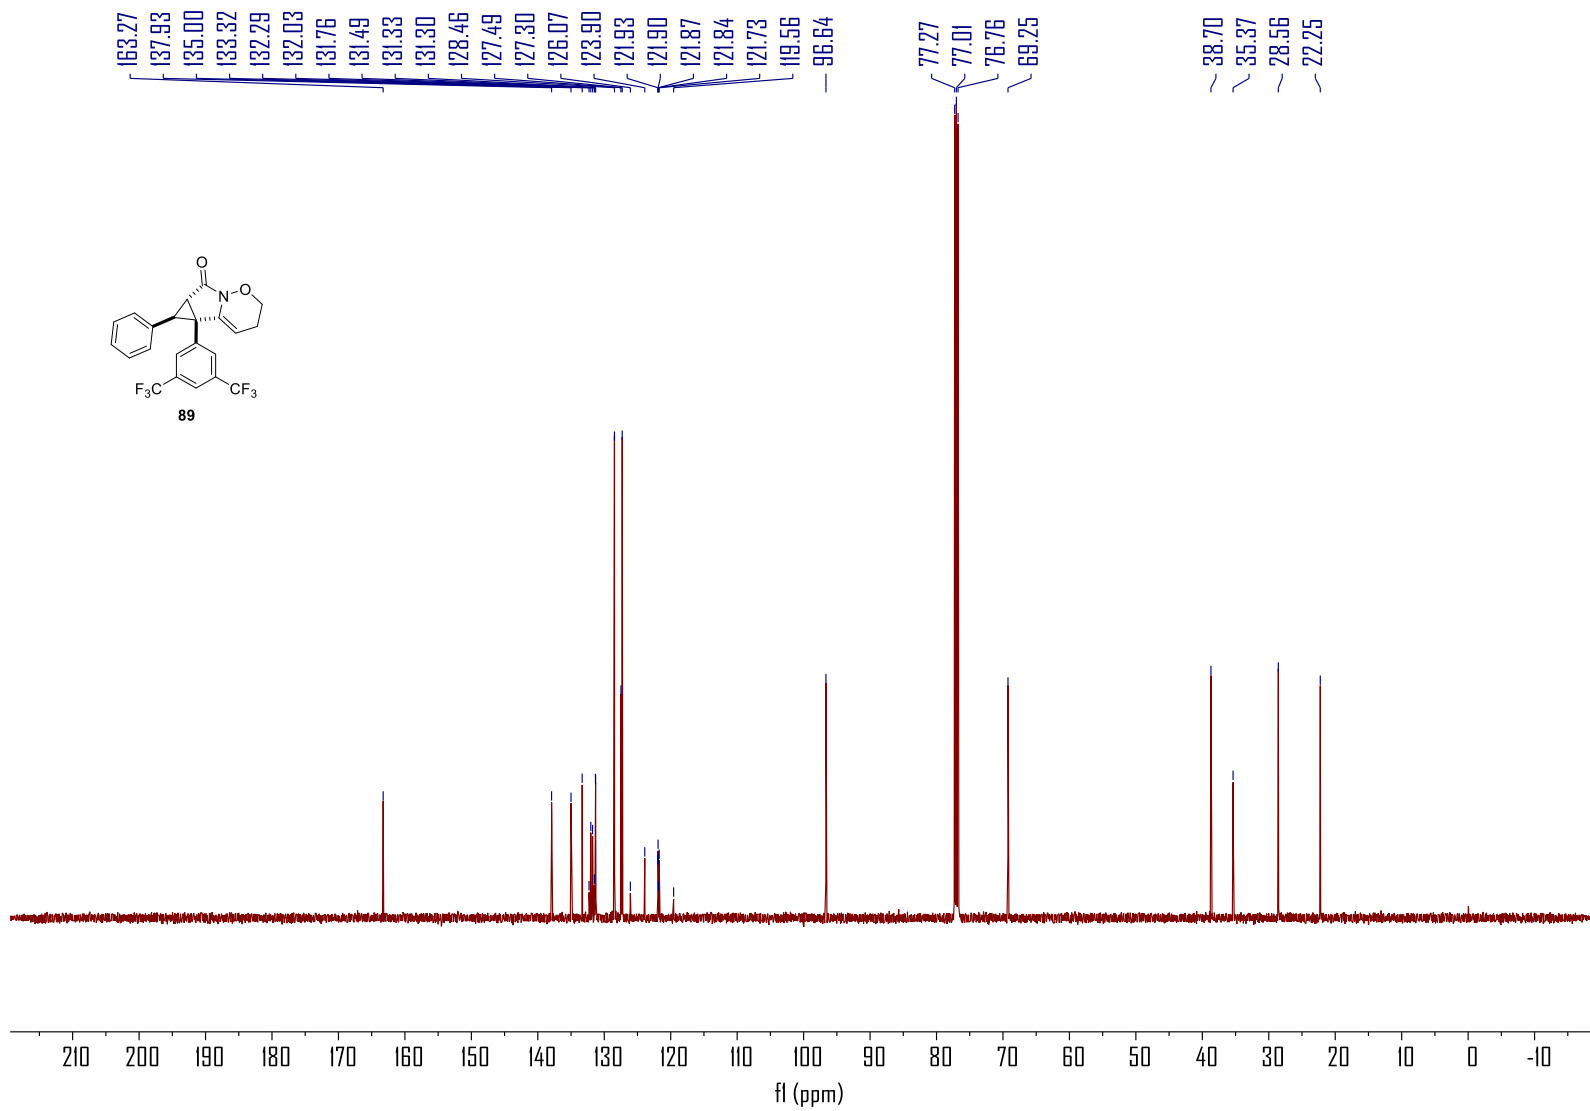

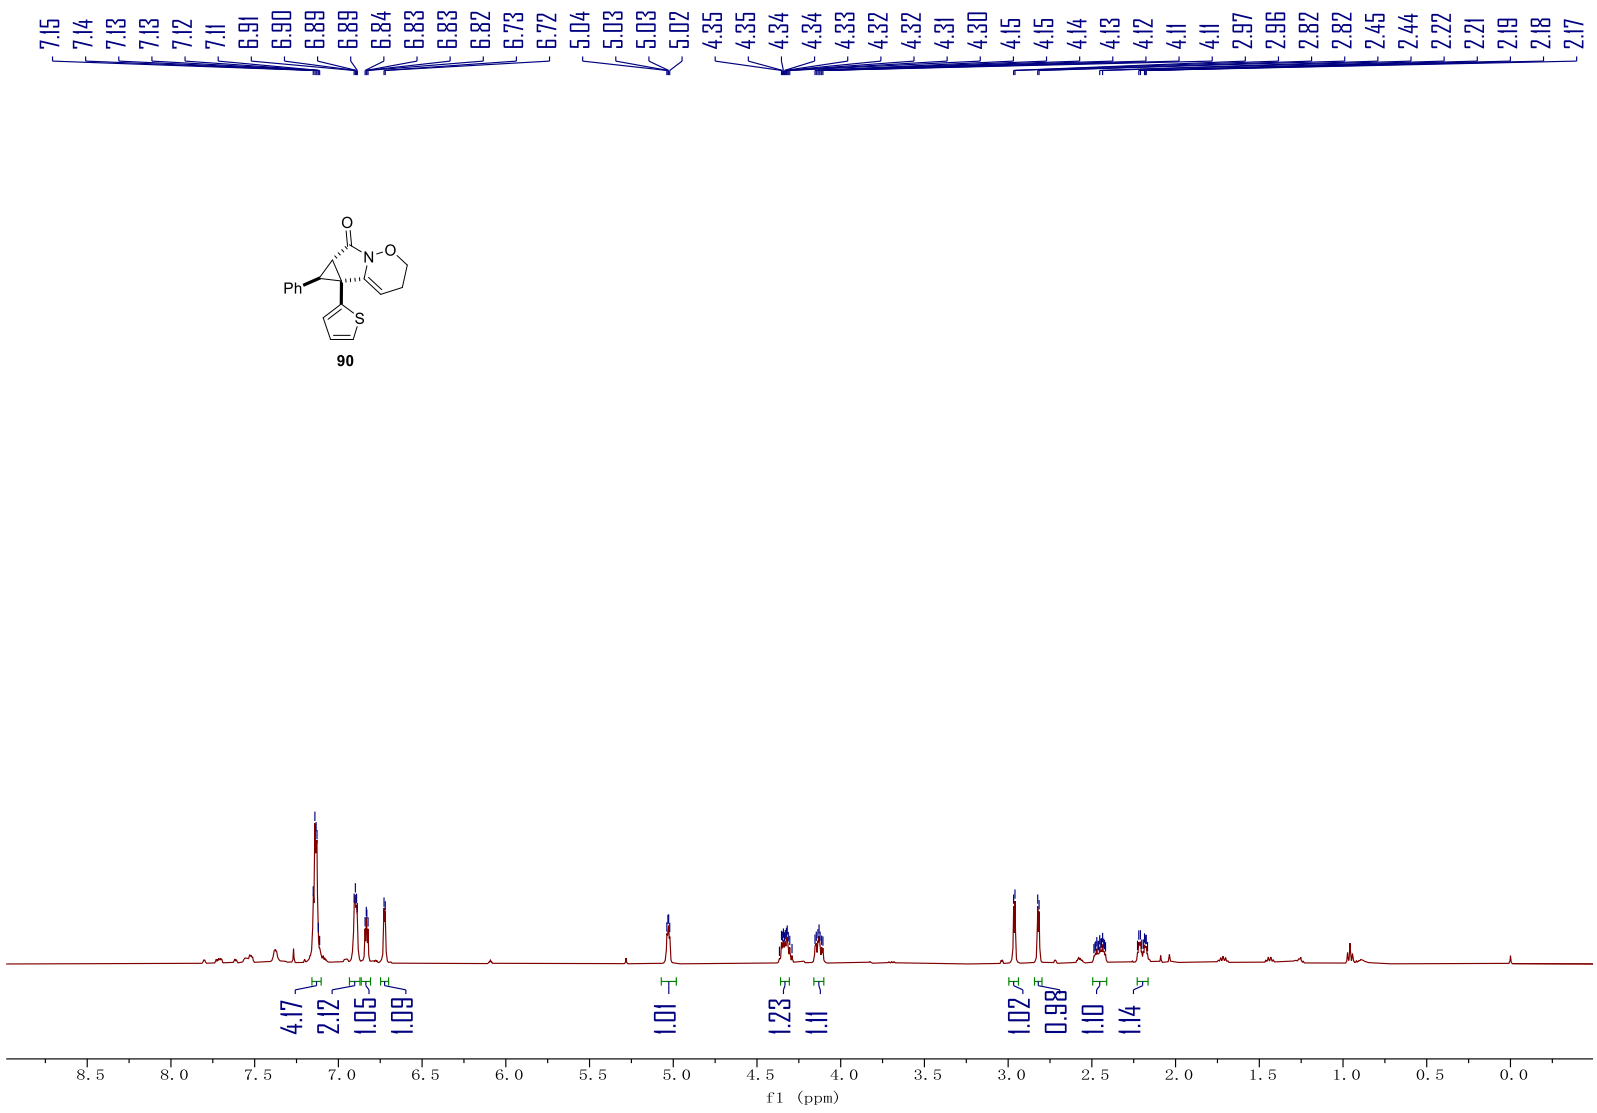

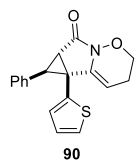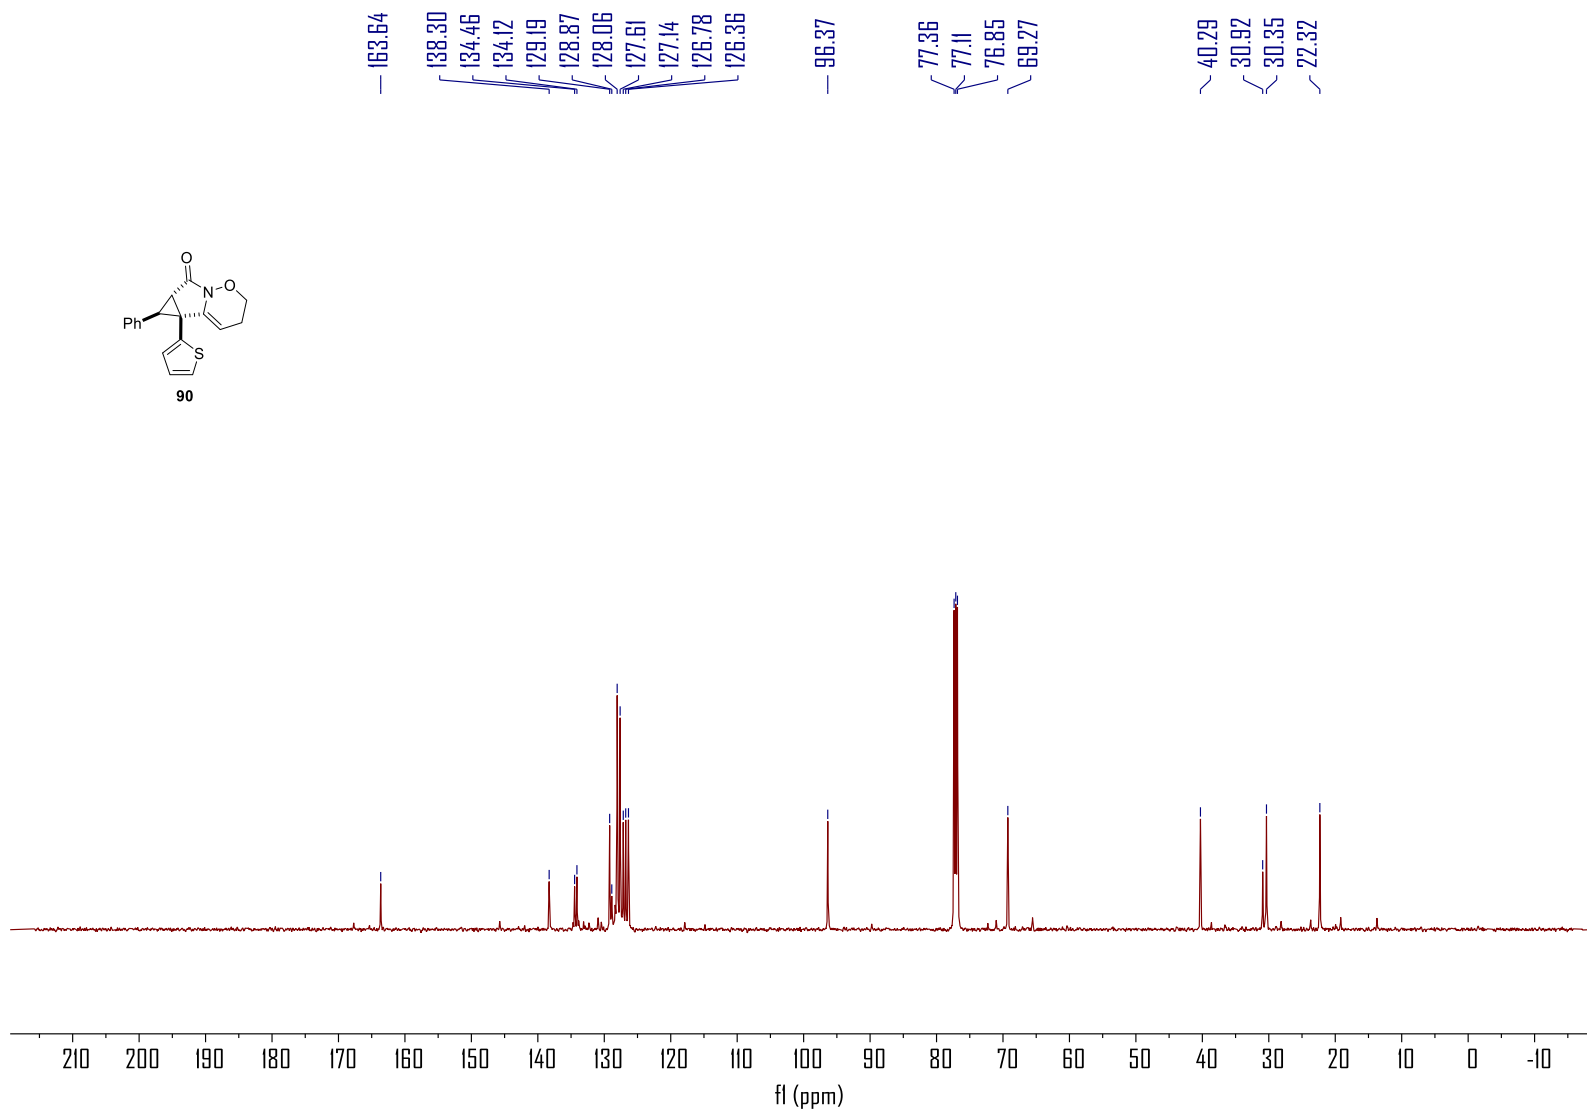



7.59  
7.58  
7.57  
7.28  
7.27  
7.25  
7.24  
7.24  
4.92  
4.92  
4.91  
4.91  
4.28  
4.28  
4.27  
4.27  
4.26  
4.25  
4.25  
4.24  
4.10  
4.09  
4.08  
4.08  
4.07  
4.06  
4.05  
3.47  
3.47  
2.66  
2.65  
2.39  
2.38  
2.38  
2.37  
2.37  
2.36  
2.35  
2.35  
2.34  
2.34  
2.18  
2.18  
2.17  
2.17  
2.15  
2.14

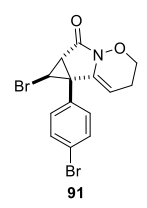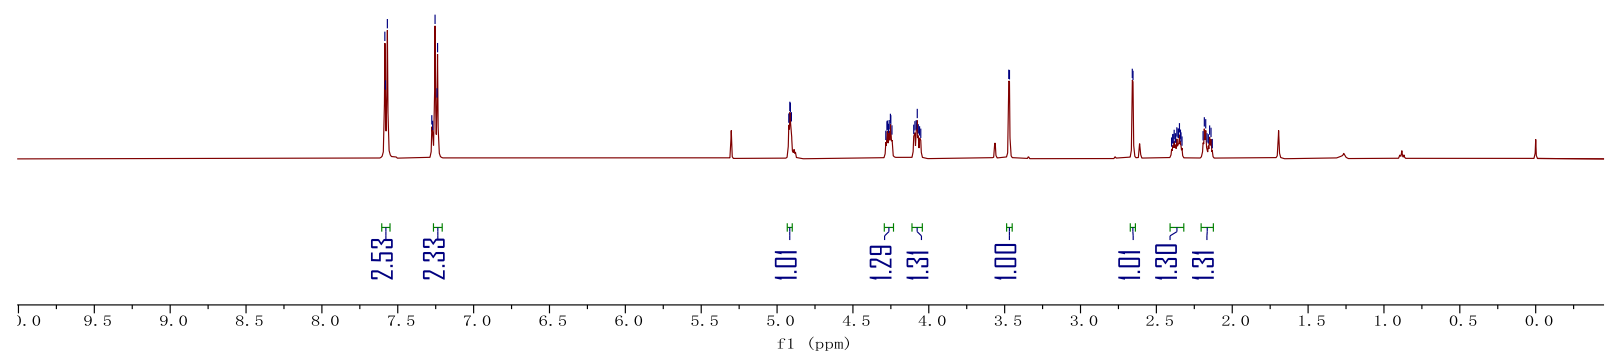

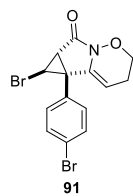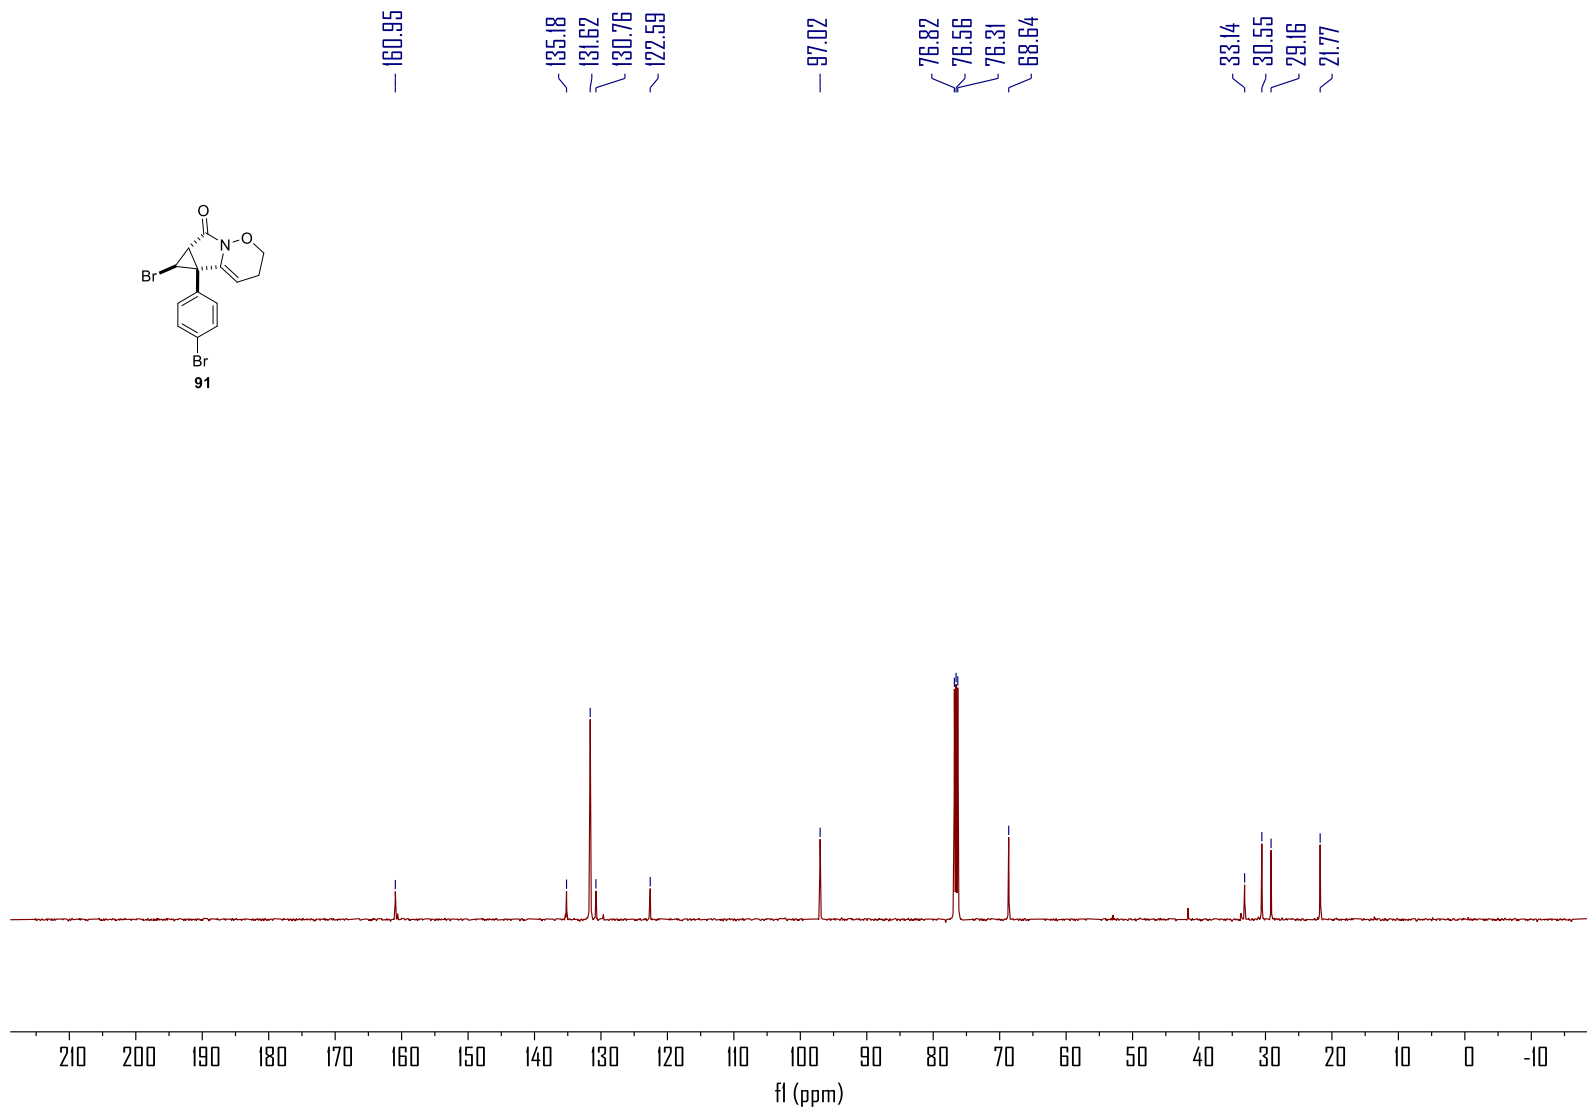

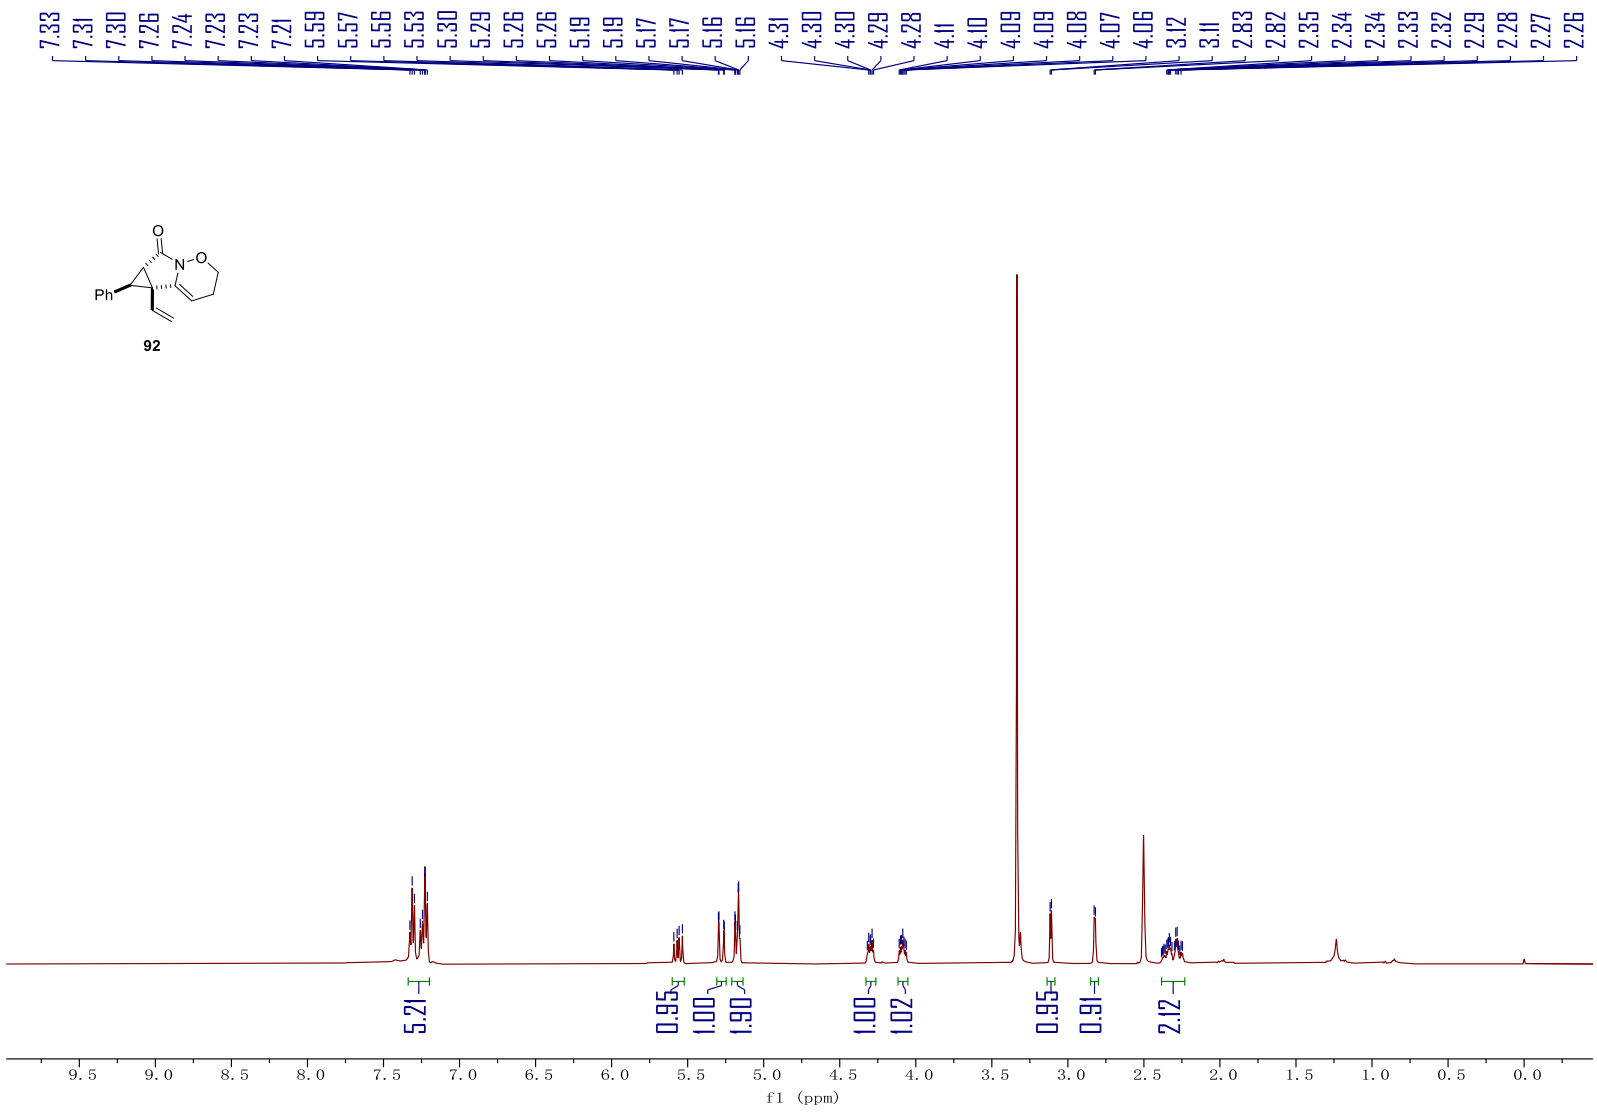

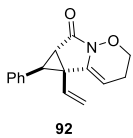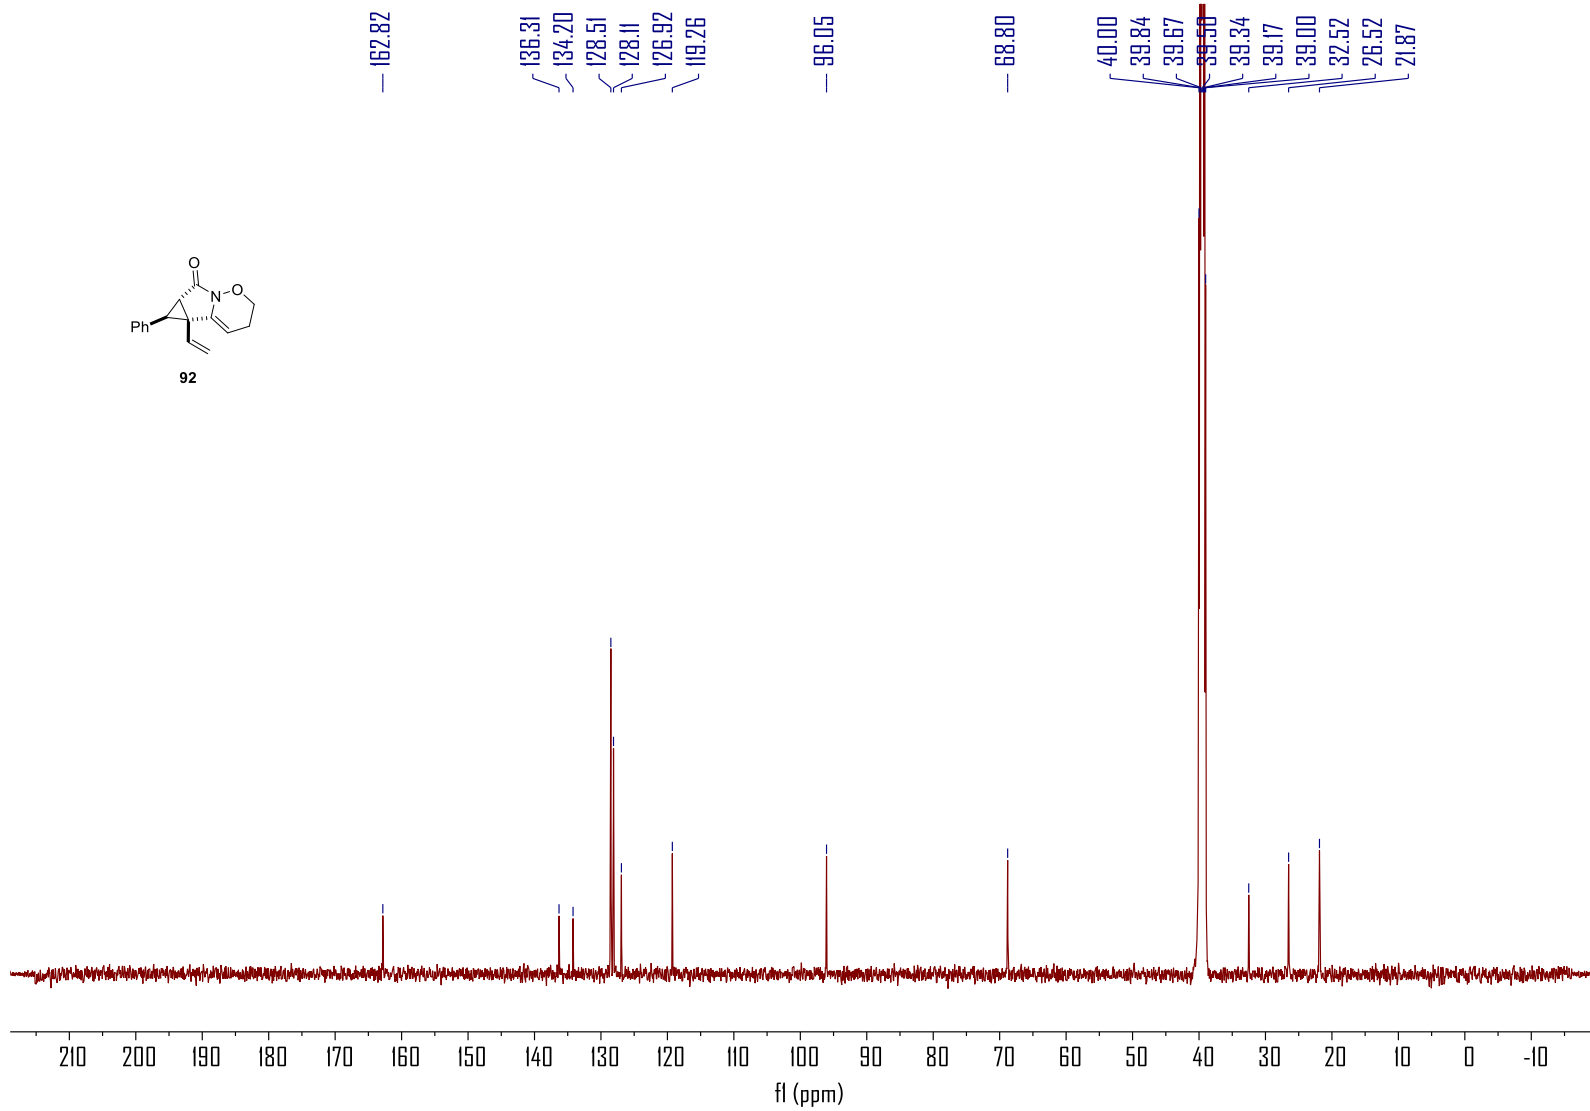

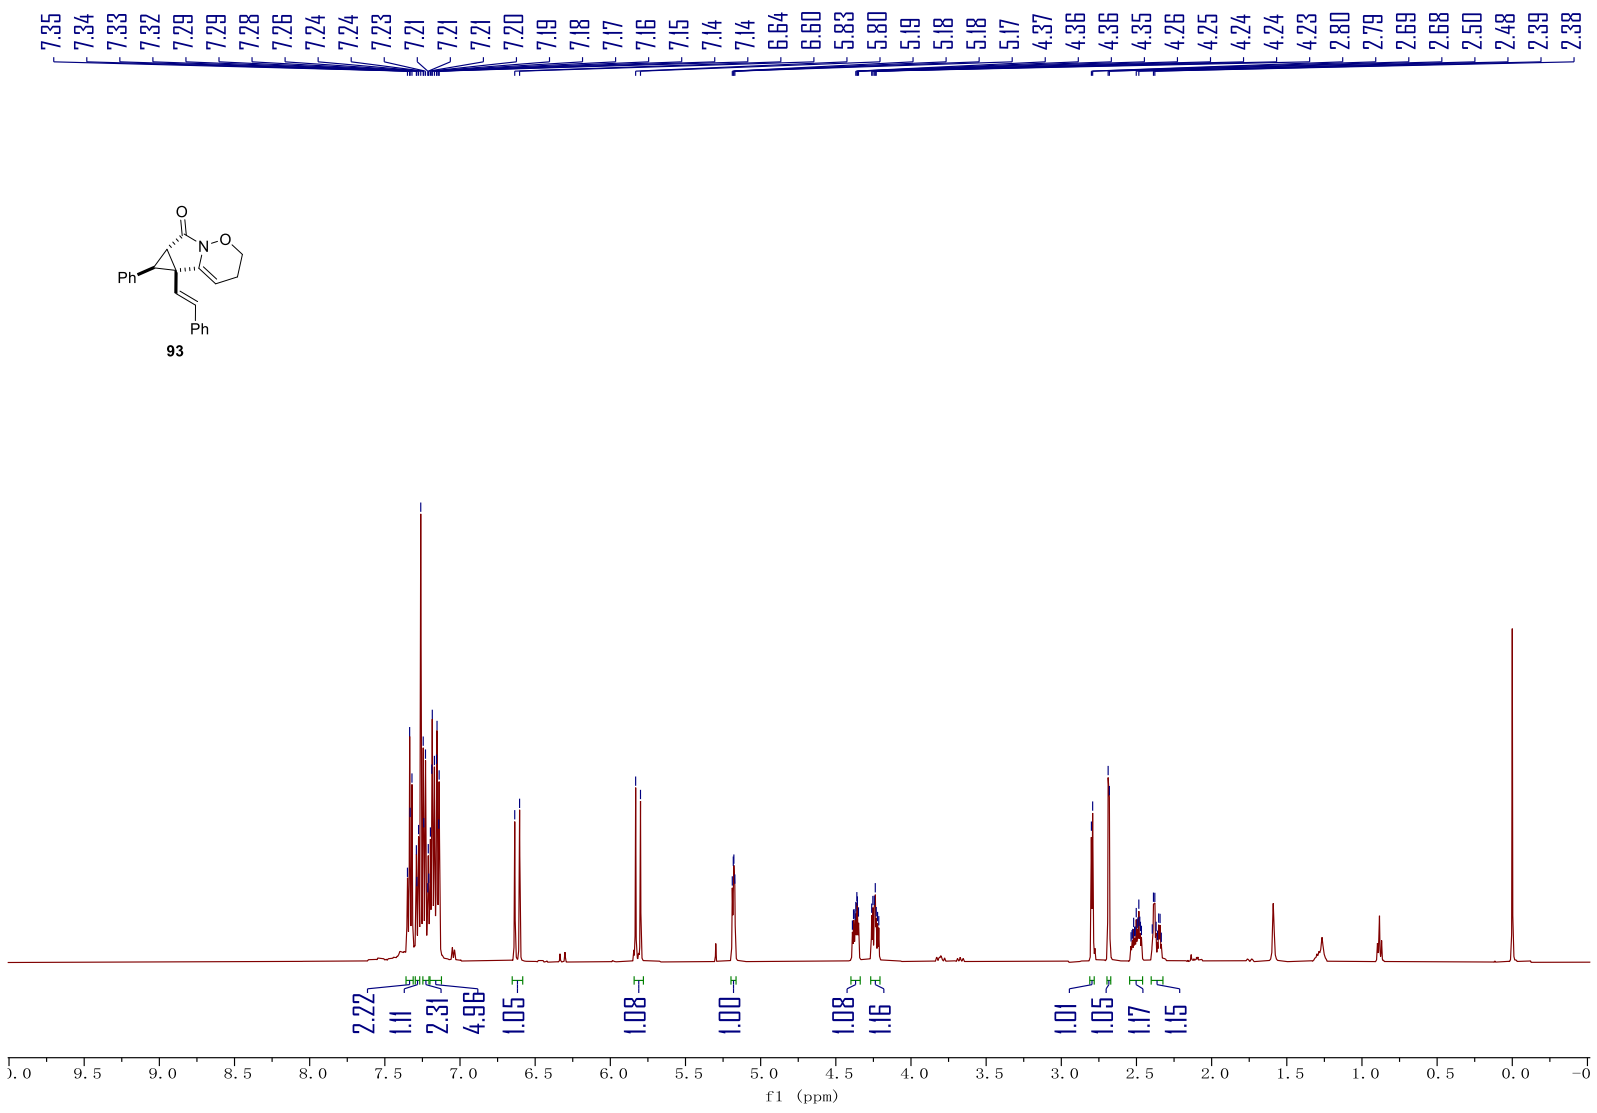

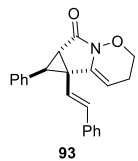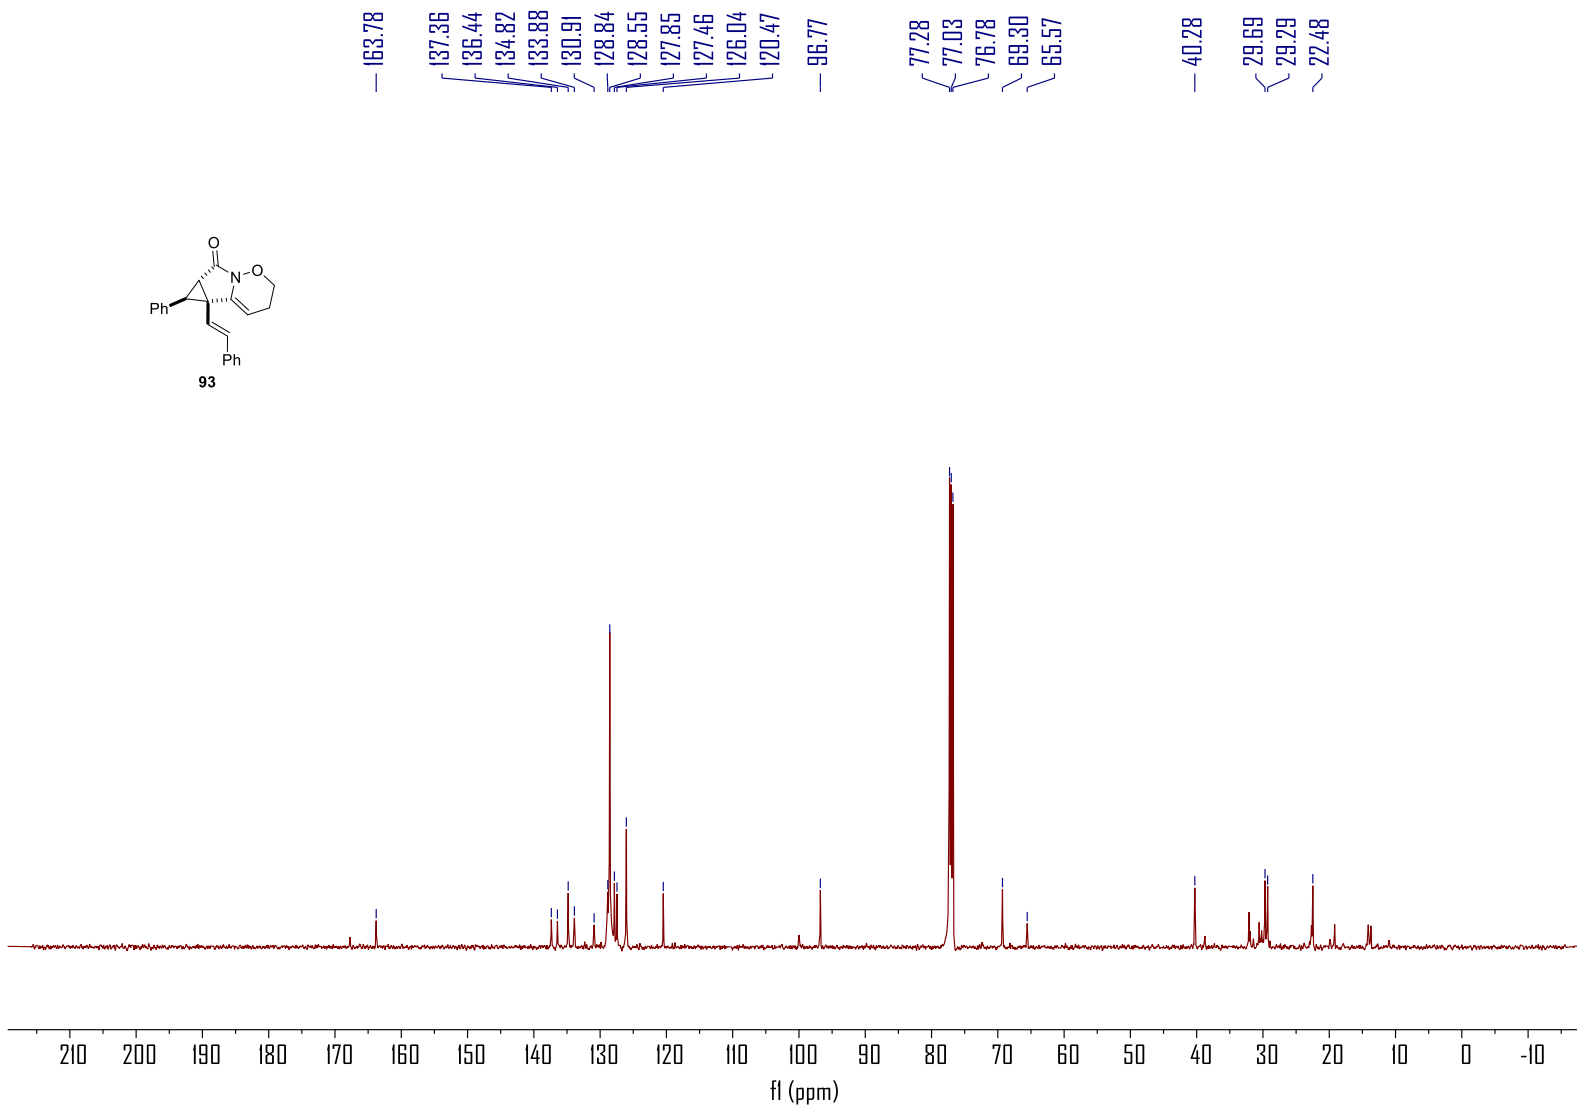

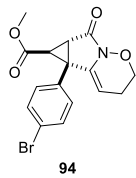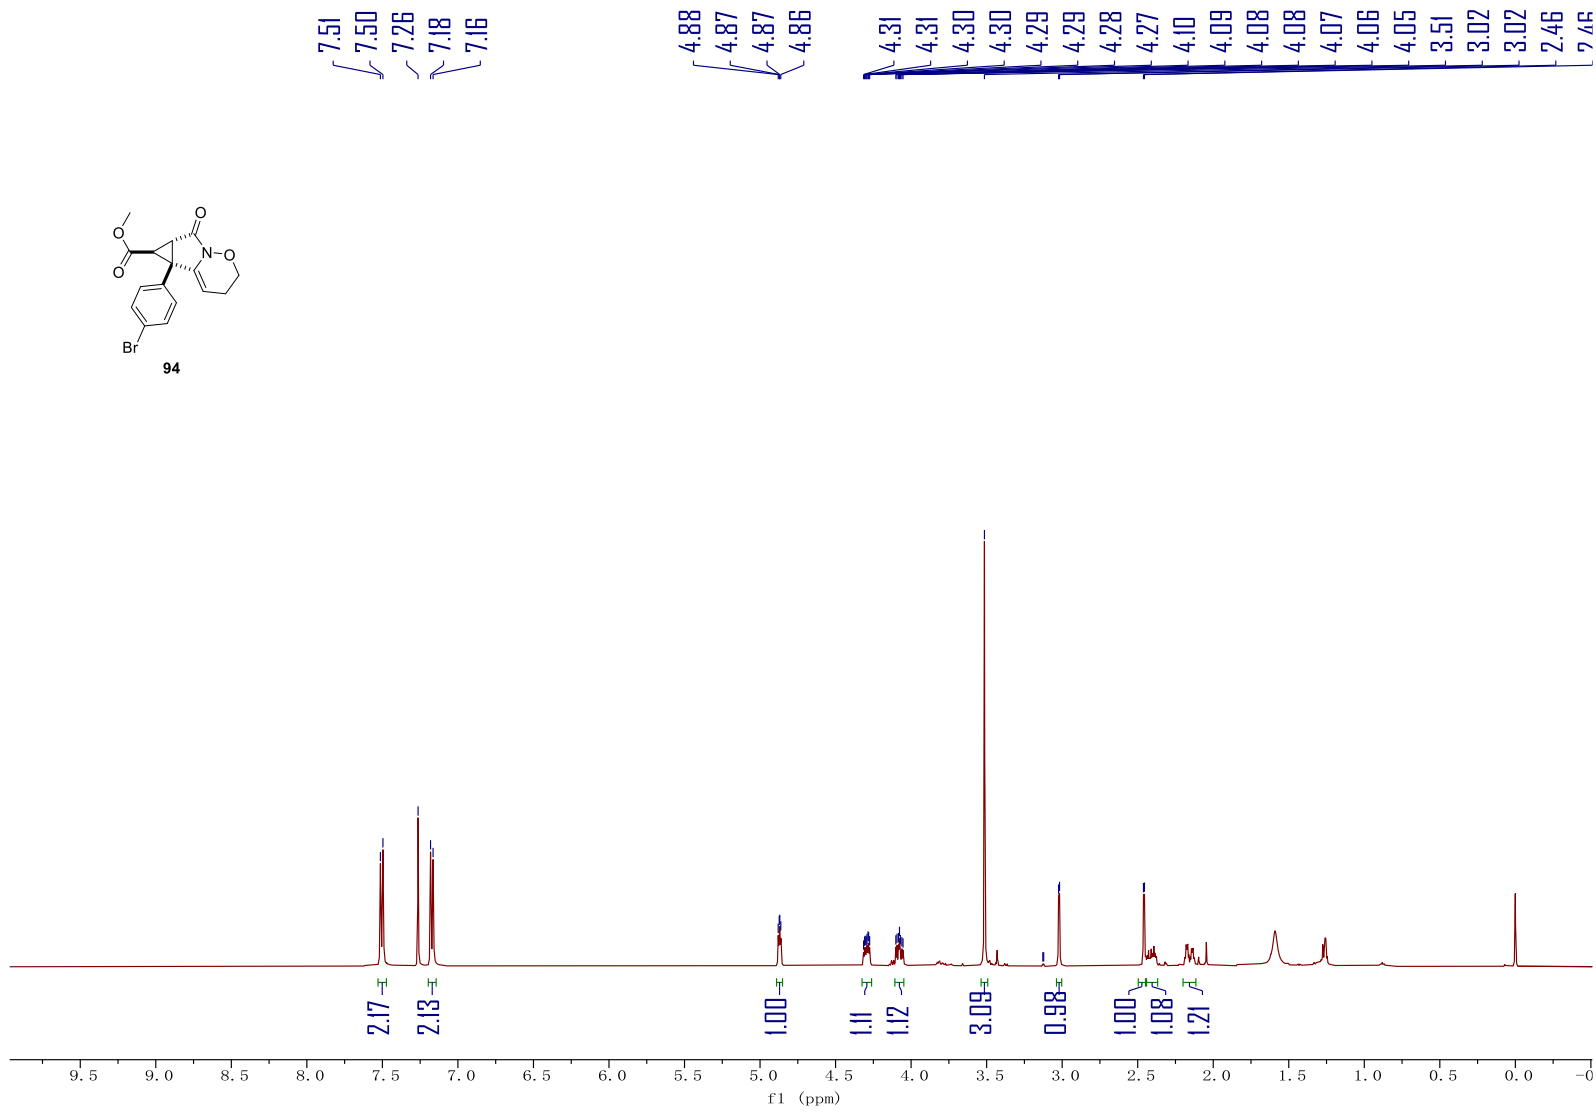

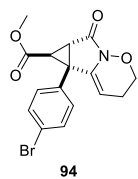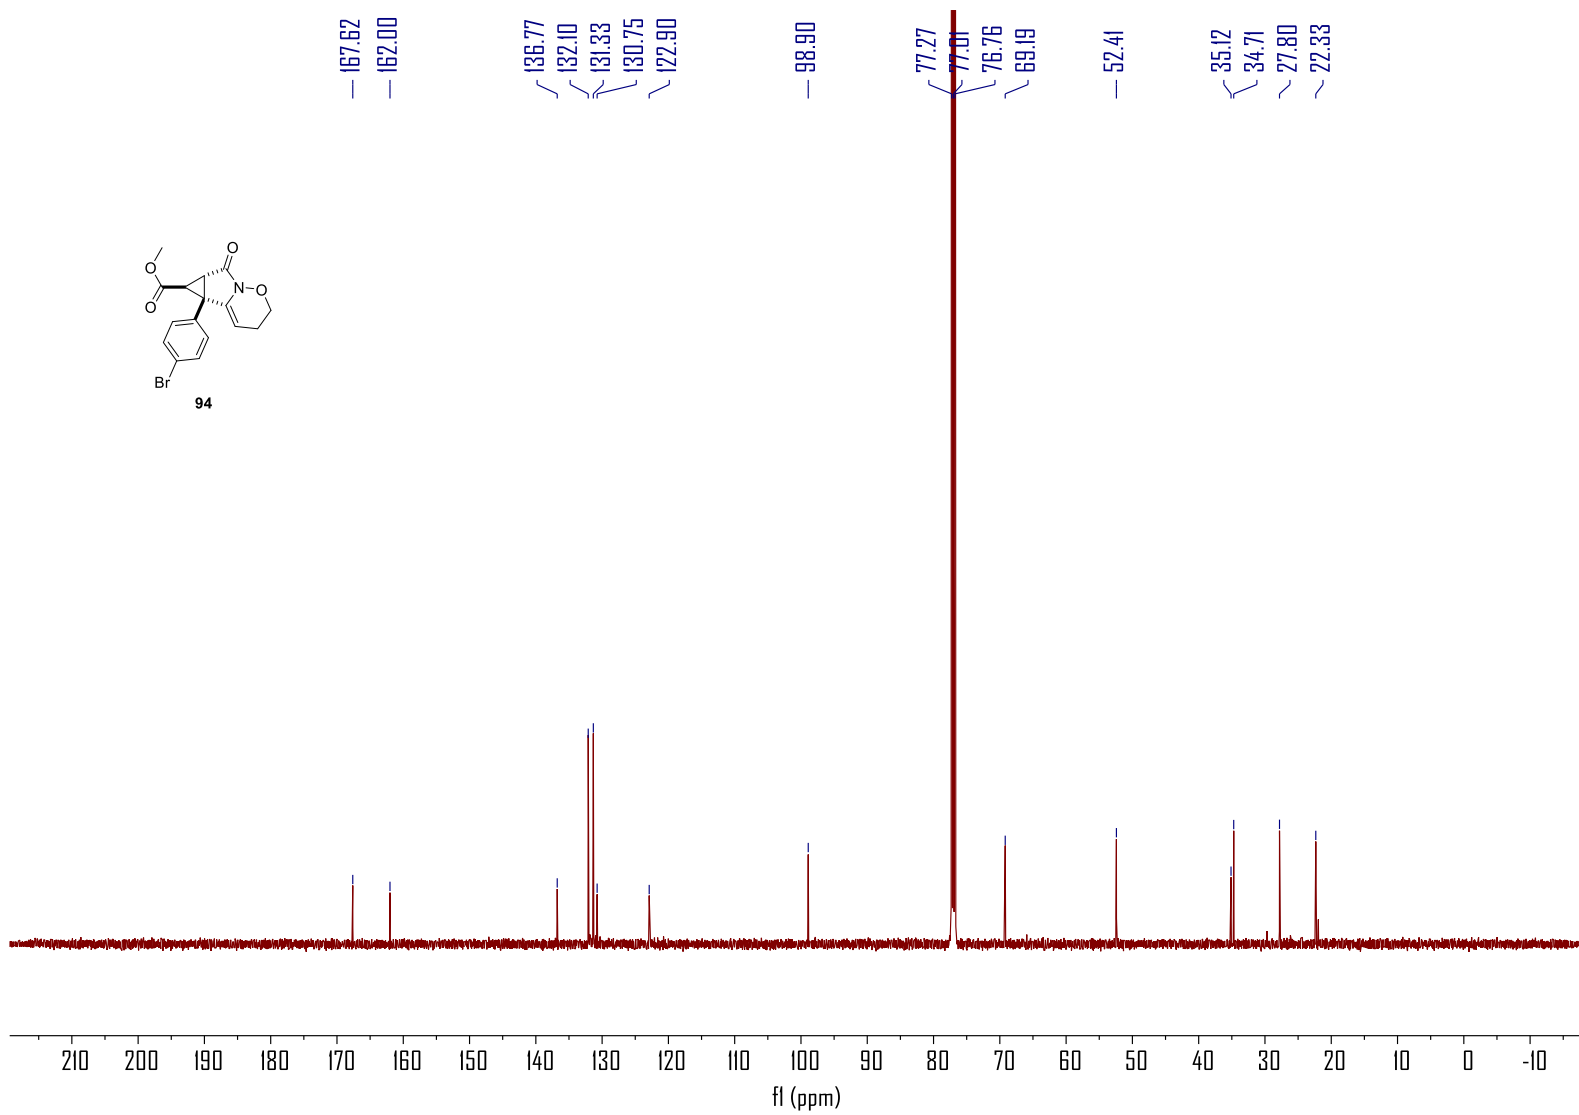



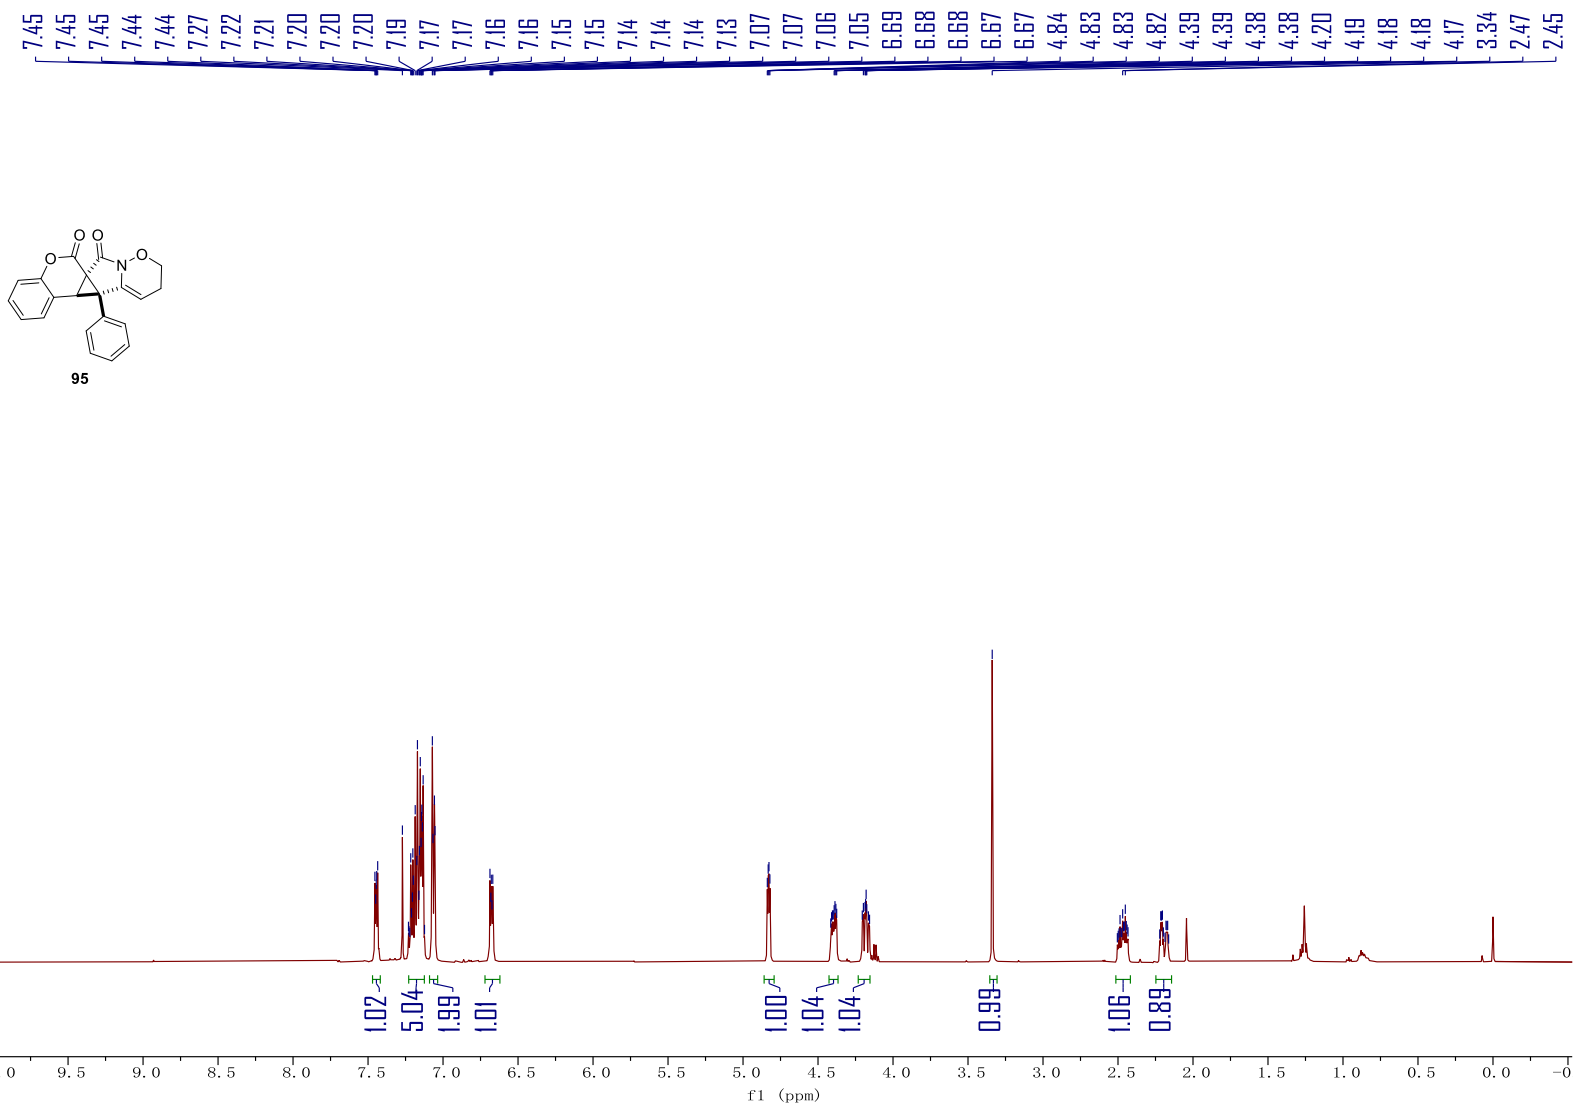

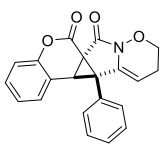

95

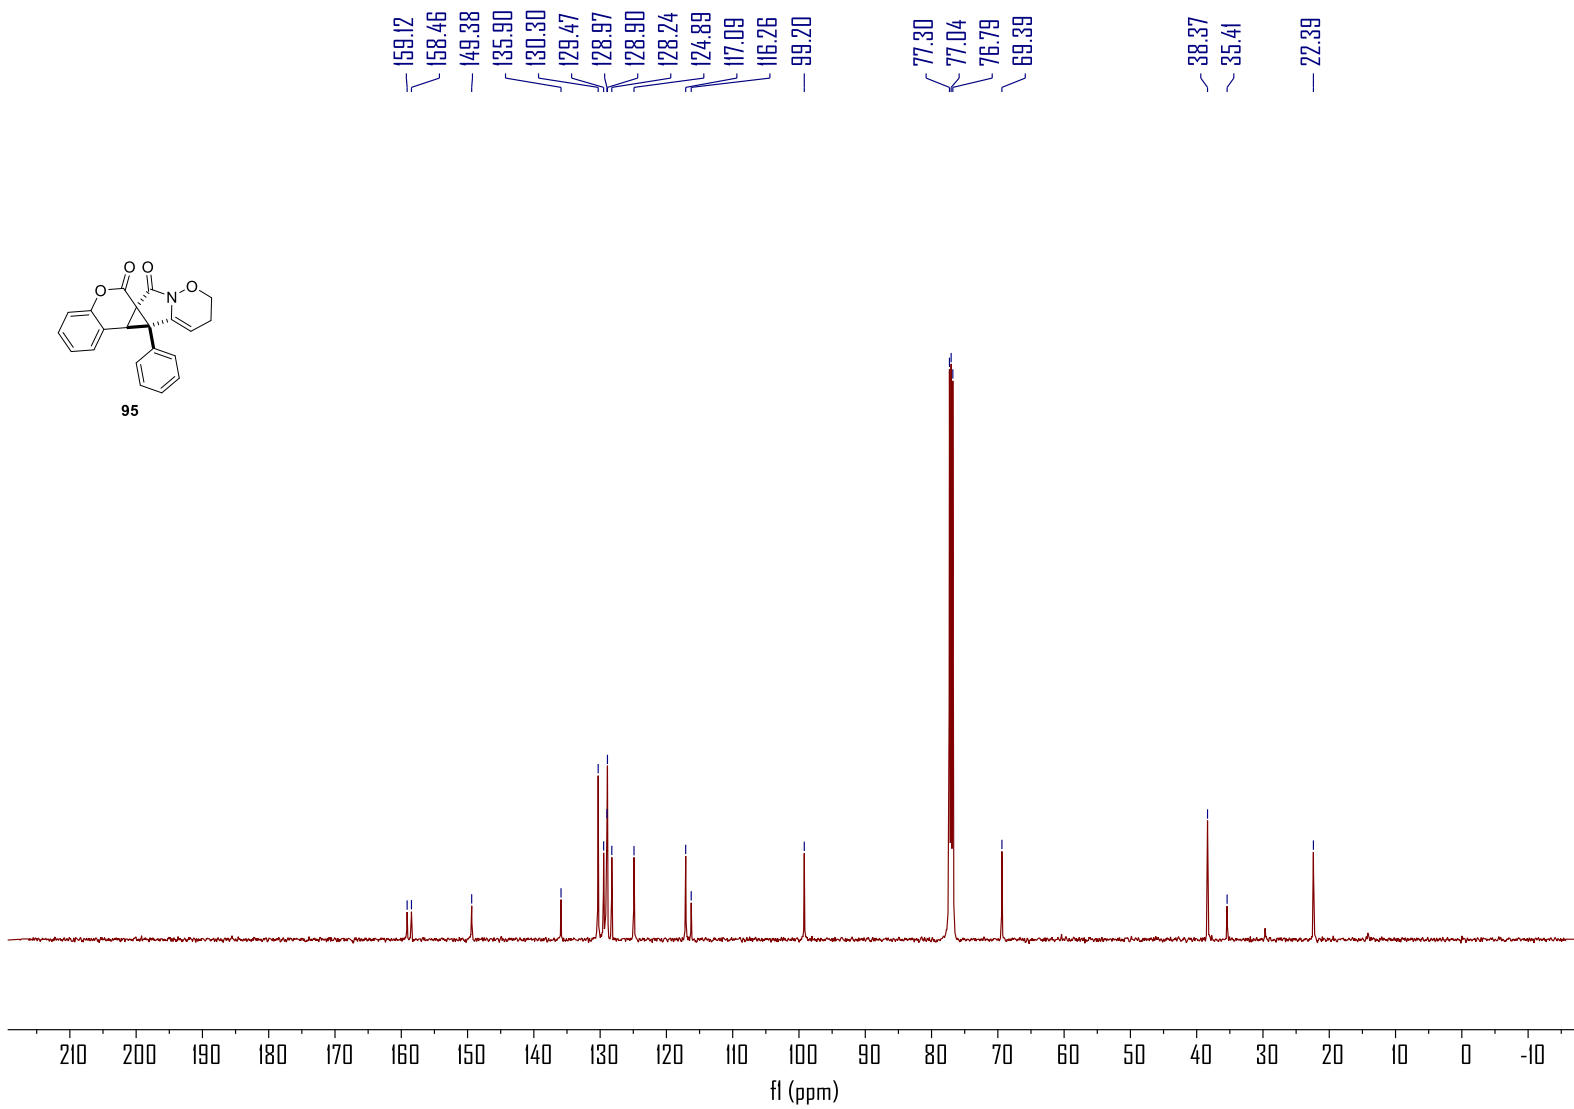

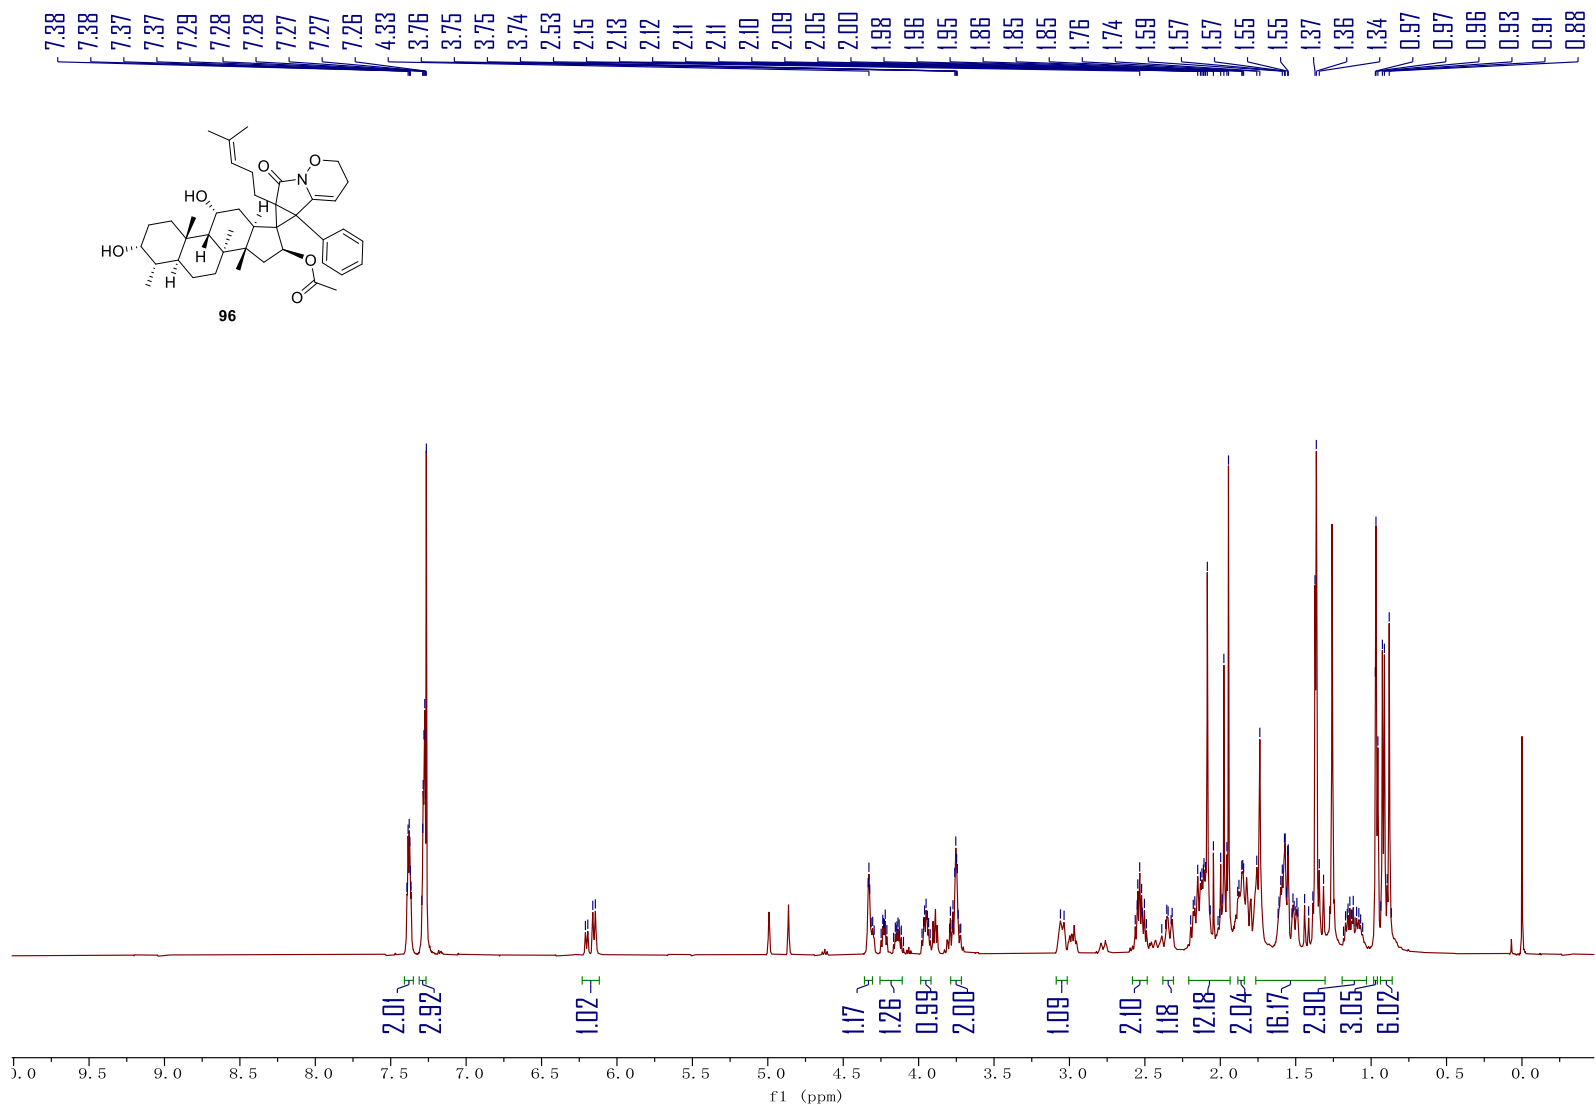

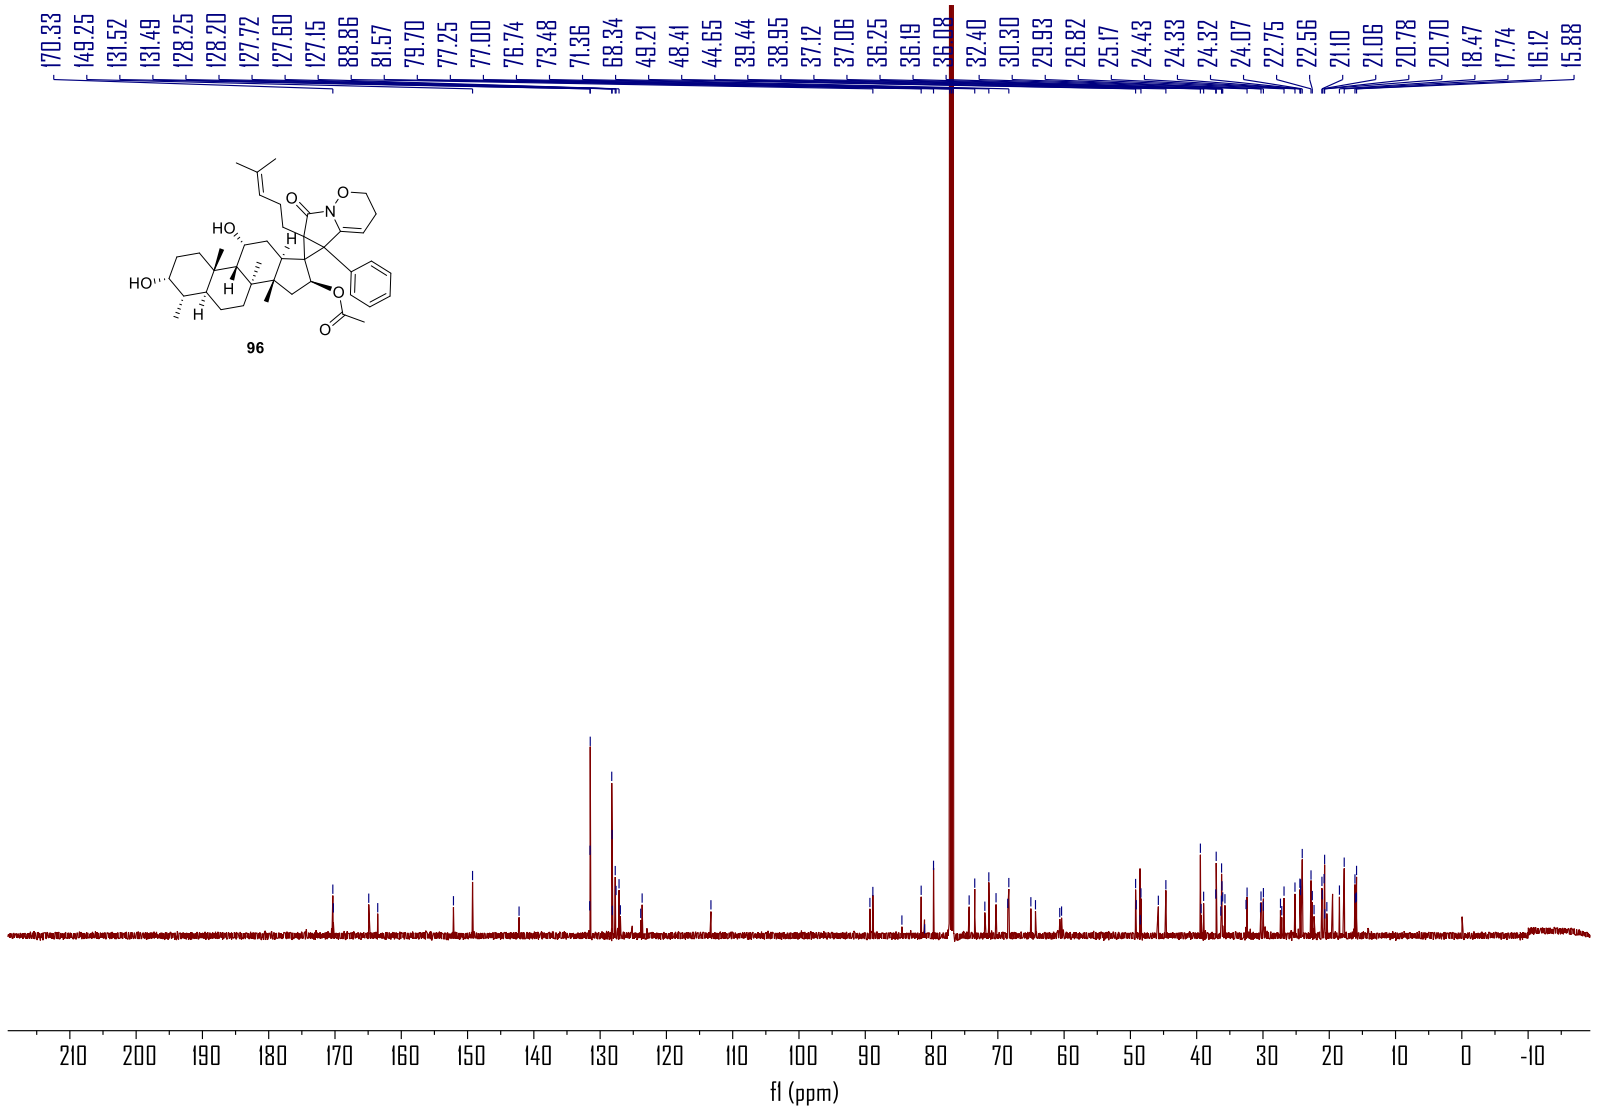

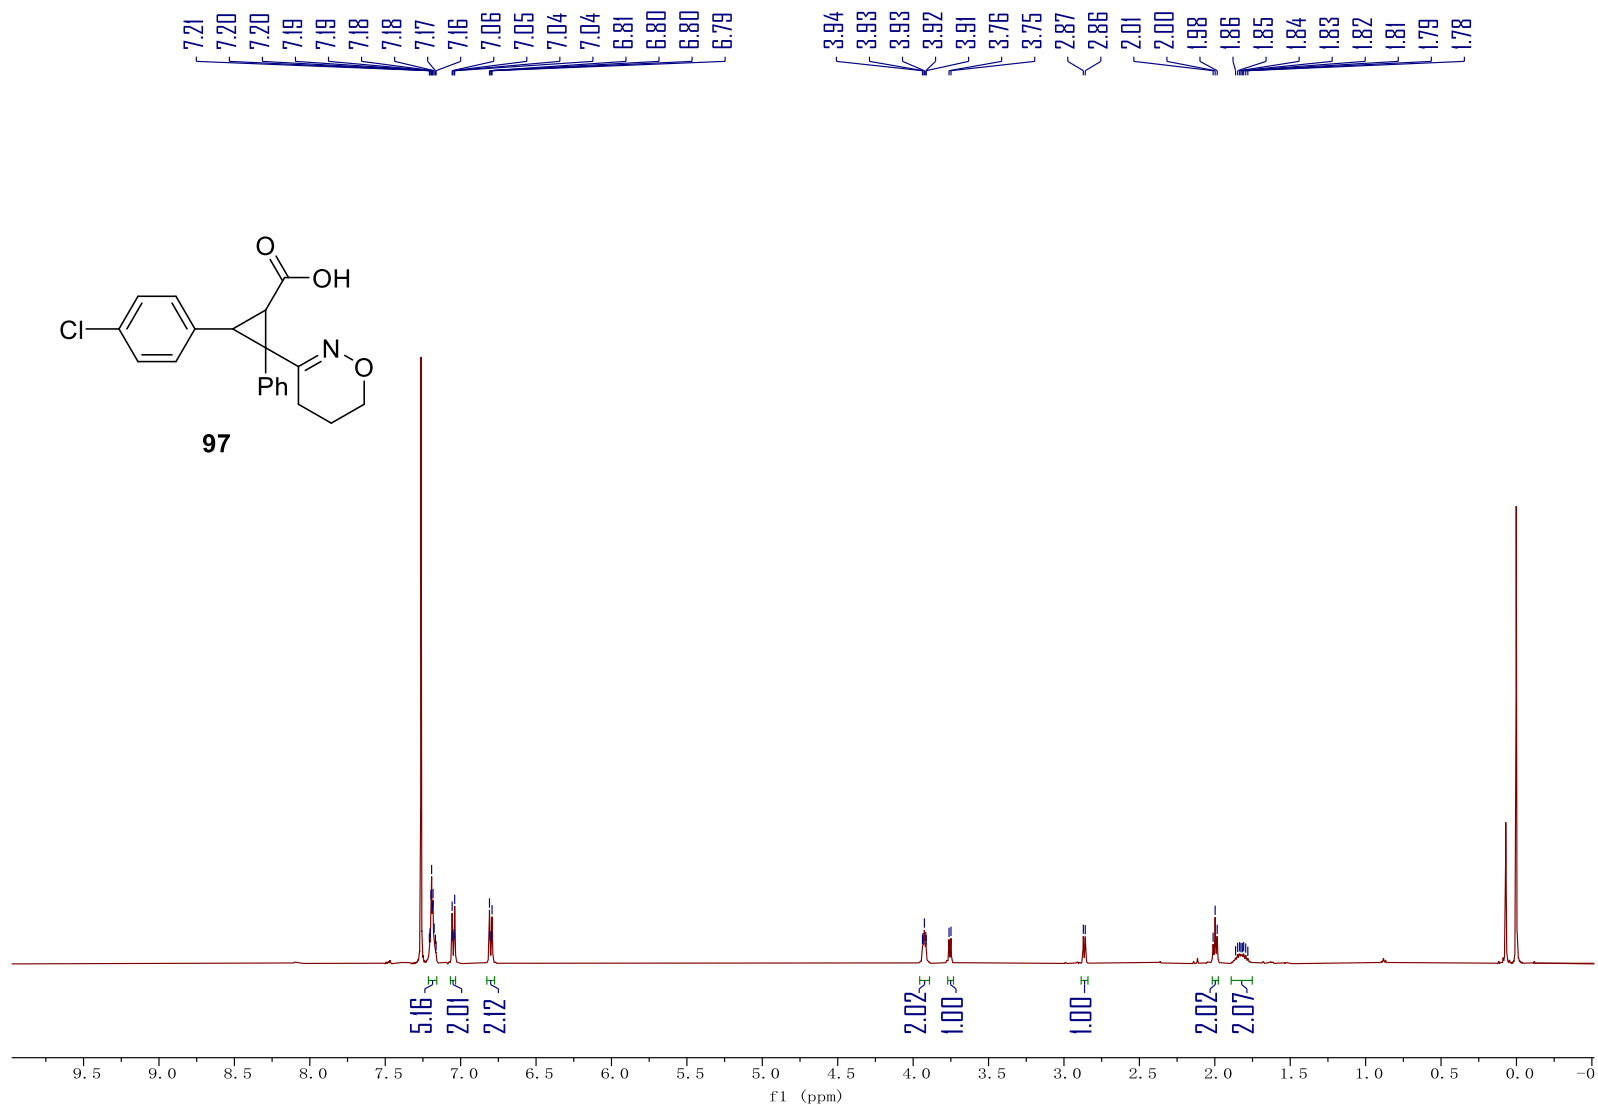

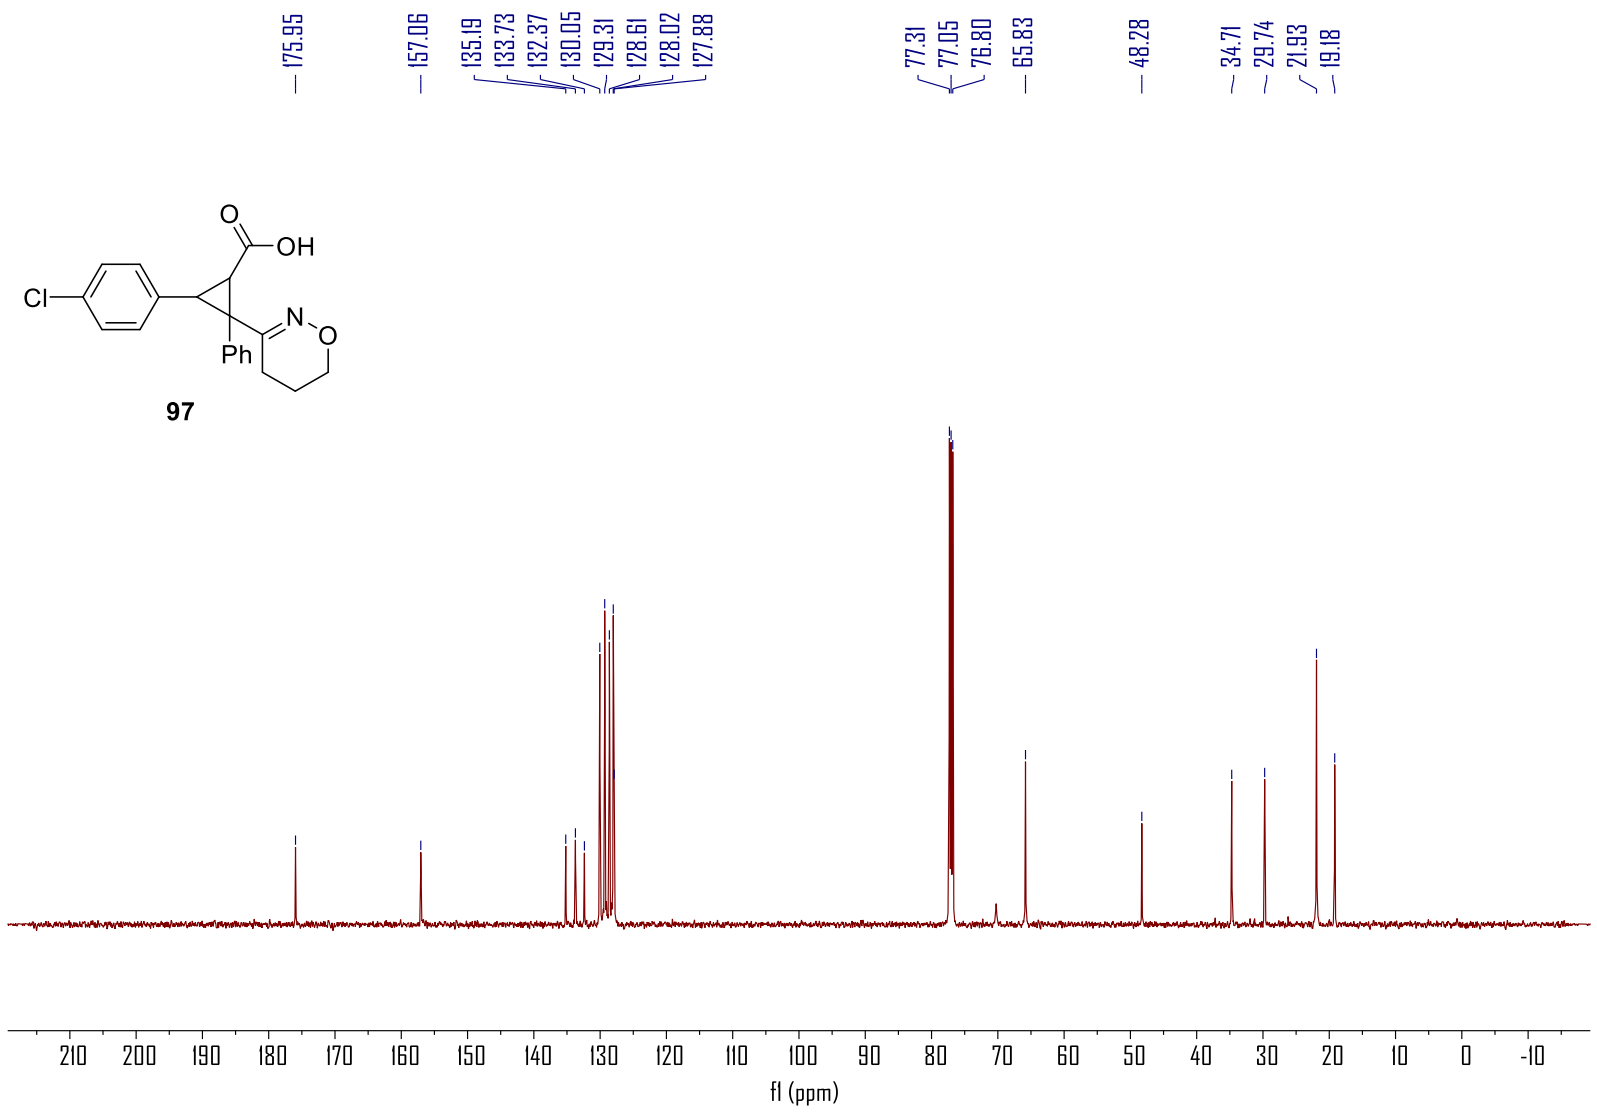

7.22  
7.21  
7.21  
7.05  
7.05  
7.04  
7.04  
7.03  
7.03  
6.70  
6.69  
6.68  
4.20  
4.19  
4.19  
4.18  
4.17  
4.17  
4.16  
3.92  
3.92  
3.90  
3.90  
3.78  
3.77  
3.77  
3.76  
3.76  
3.75  
3.75  
3.74  
3.73  
2.66  
2.66  
2.64  
2.63  
2.23  
2.23  
2.22  
2.21  
2.20  
2.19  
1.85  
1.84  
1.83  
1.83  
1.82

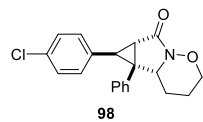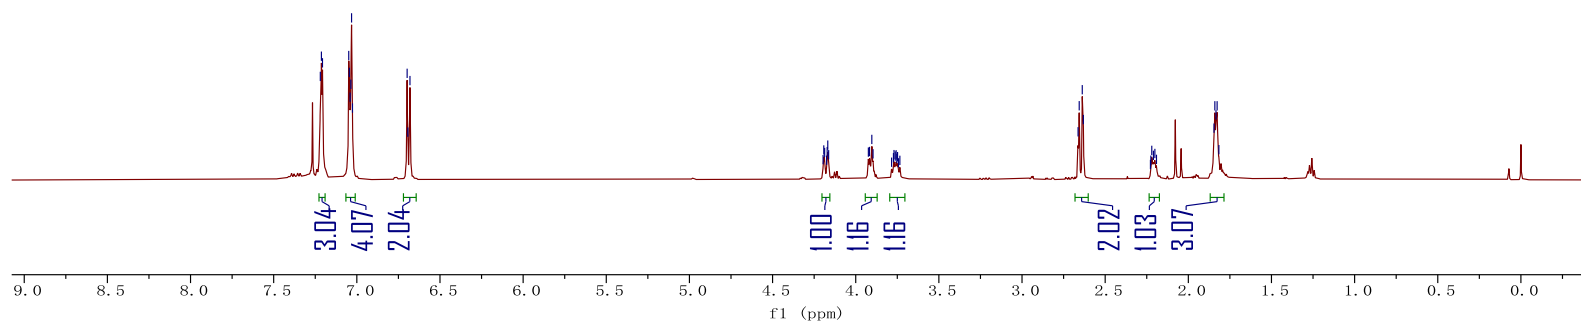

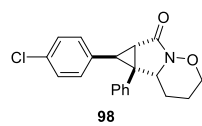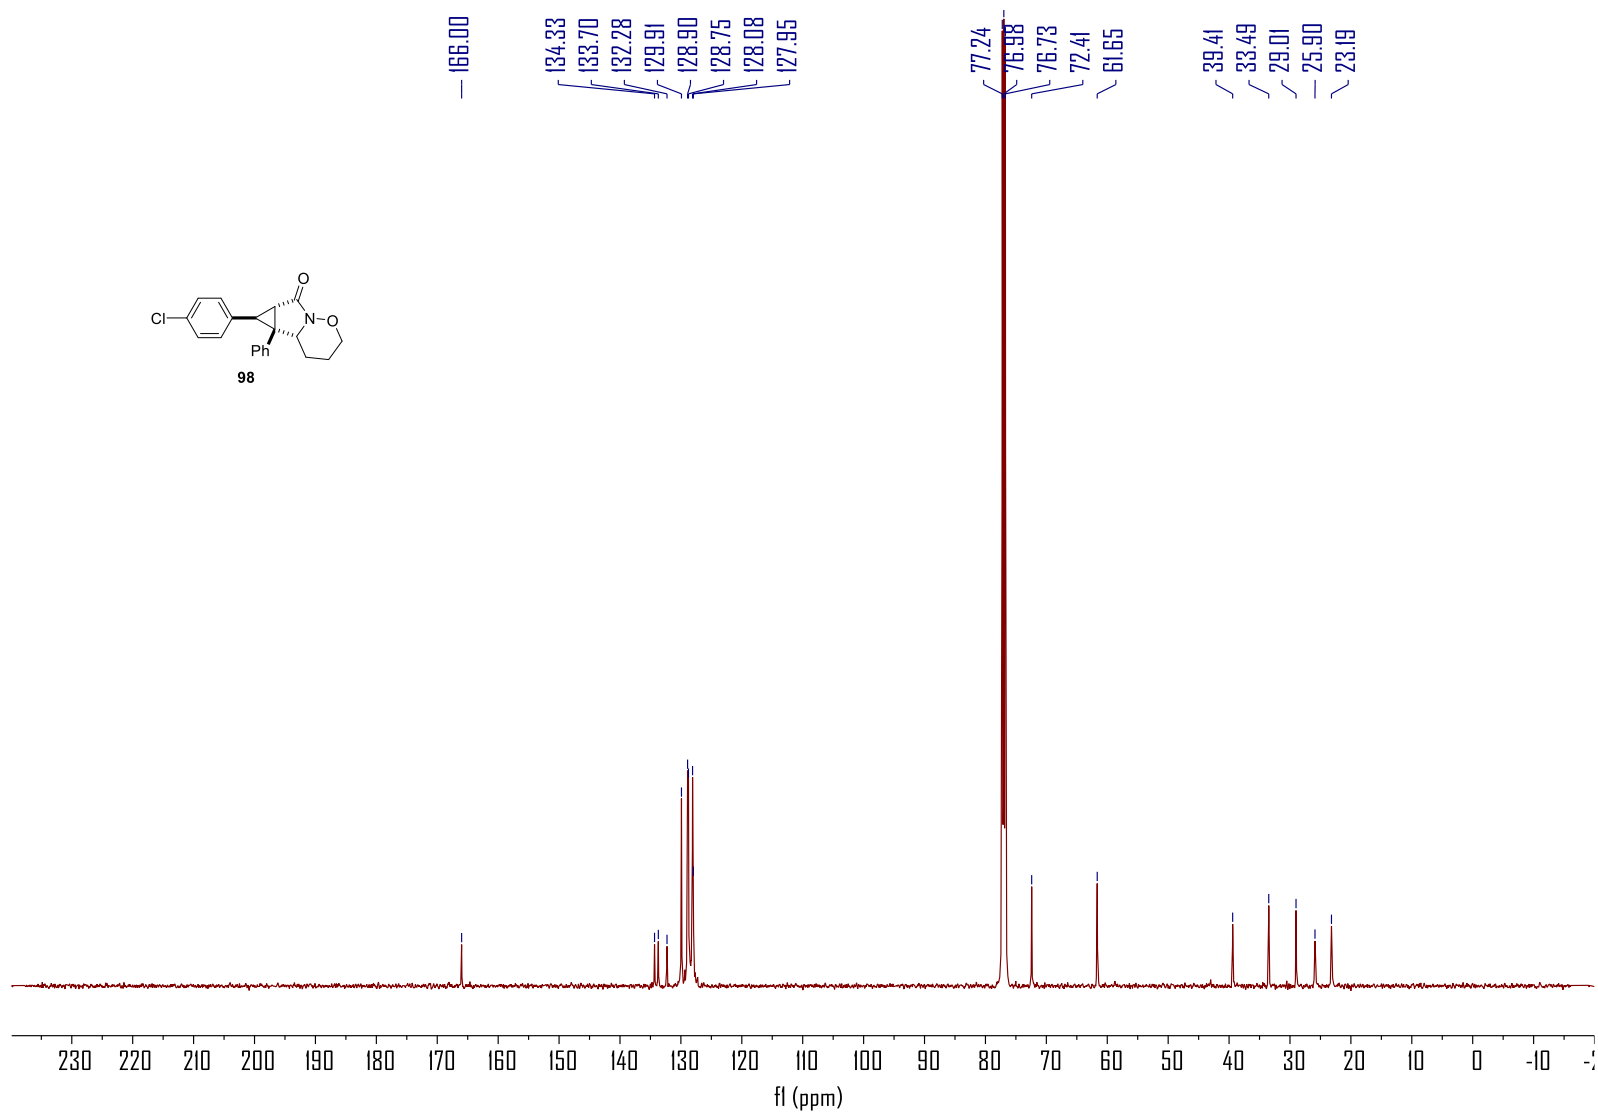



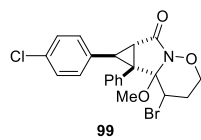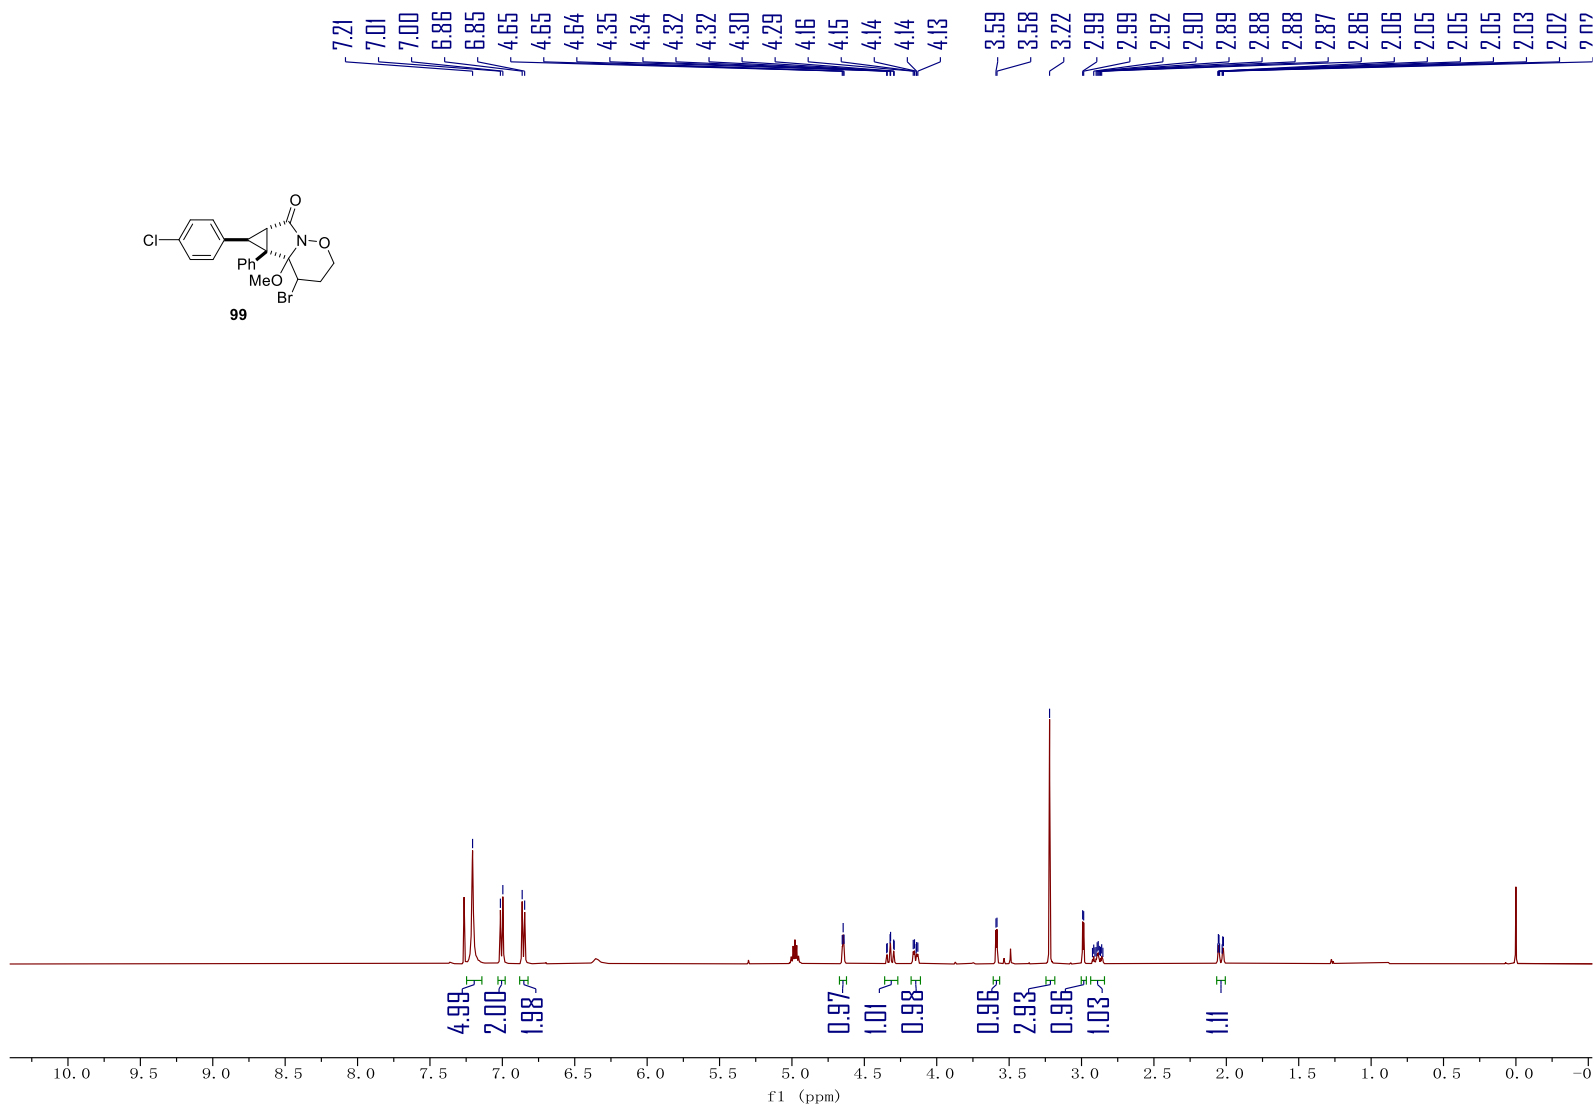

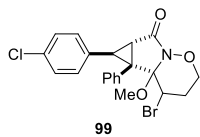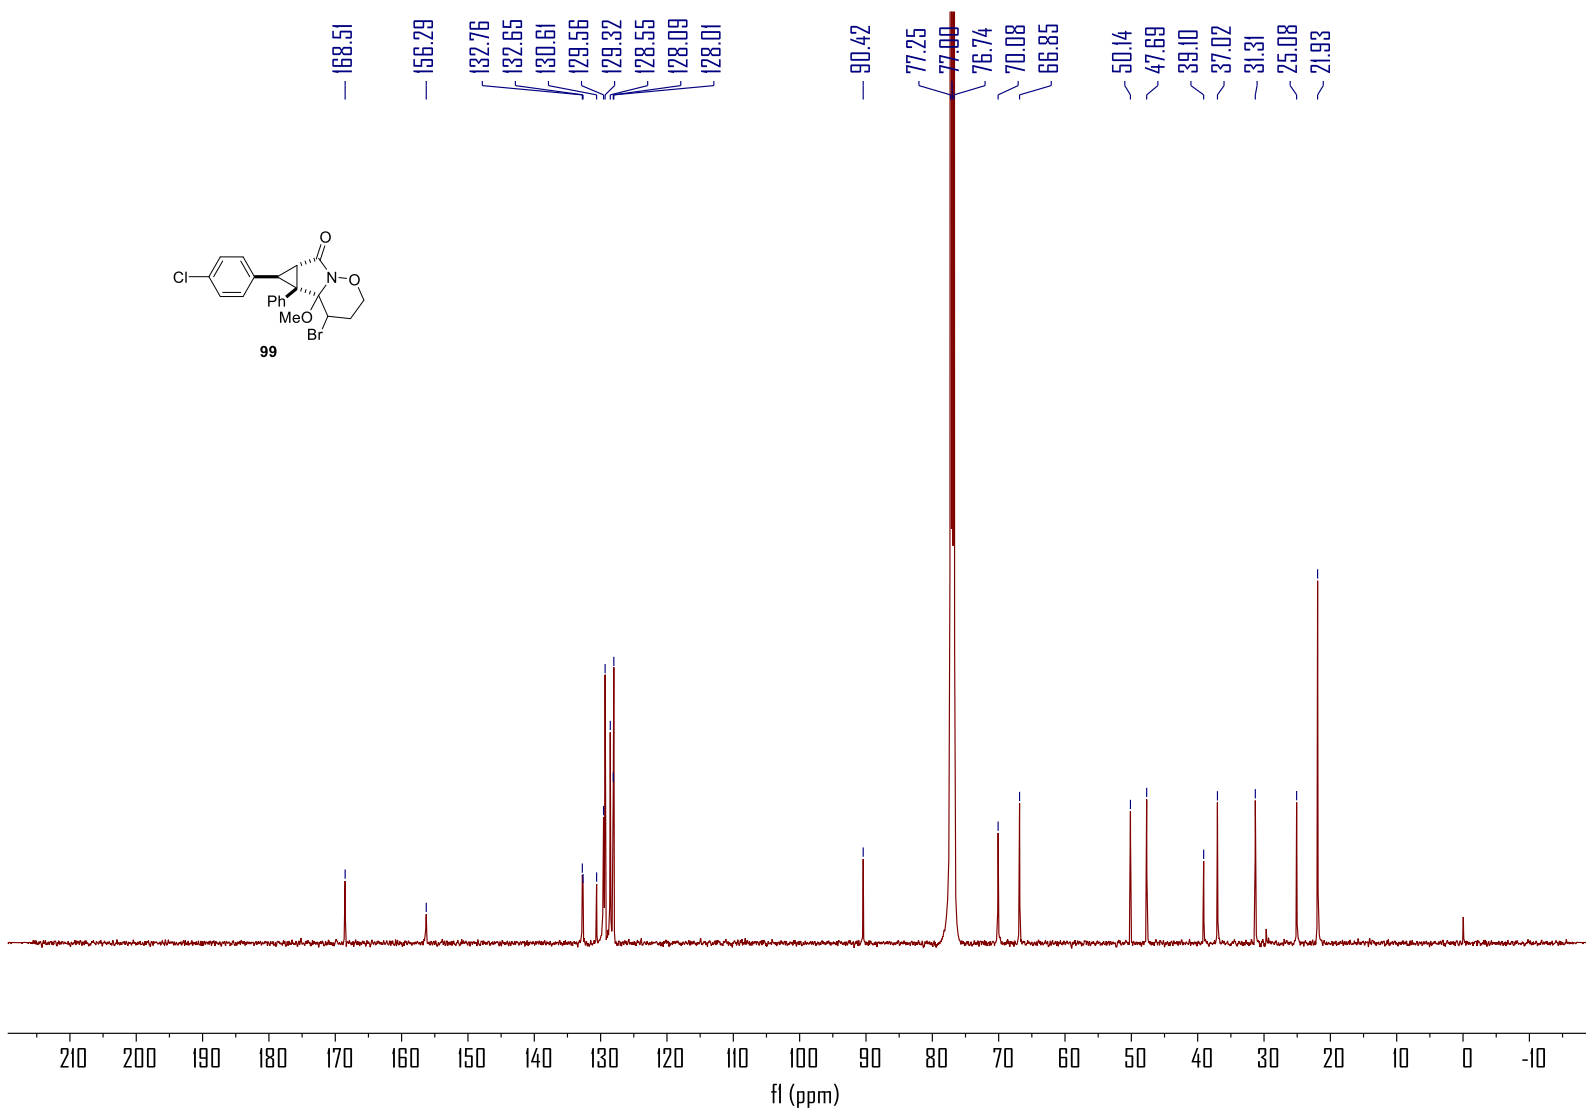

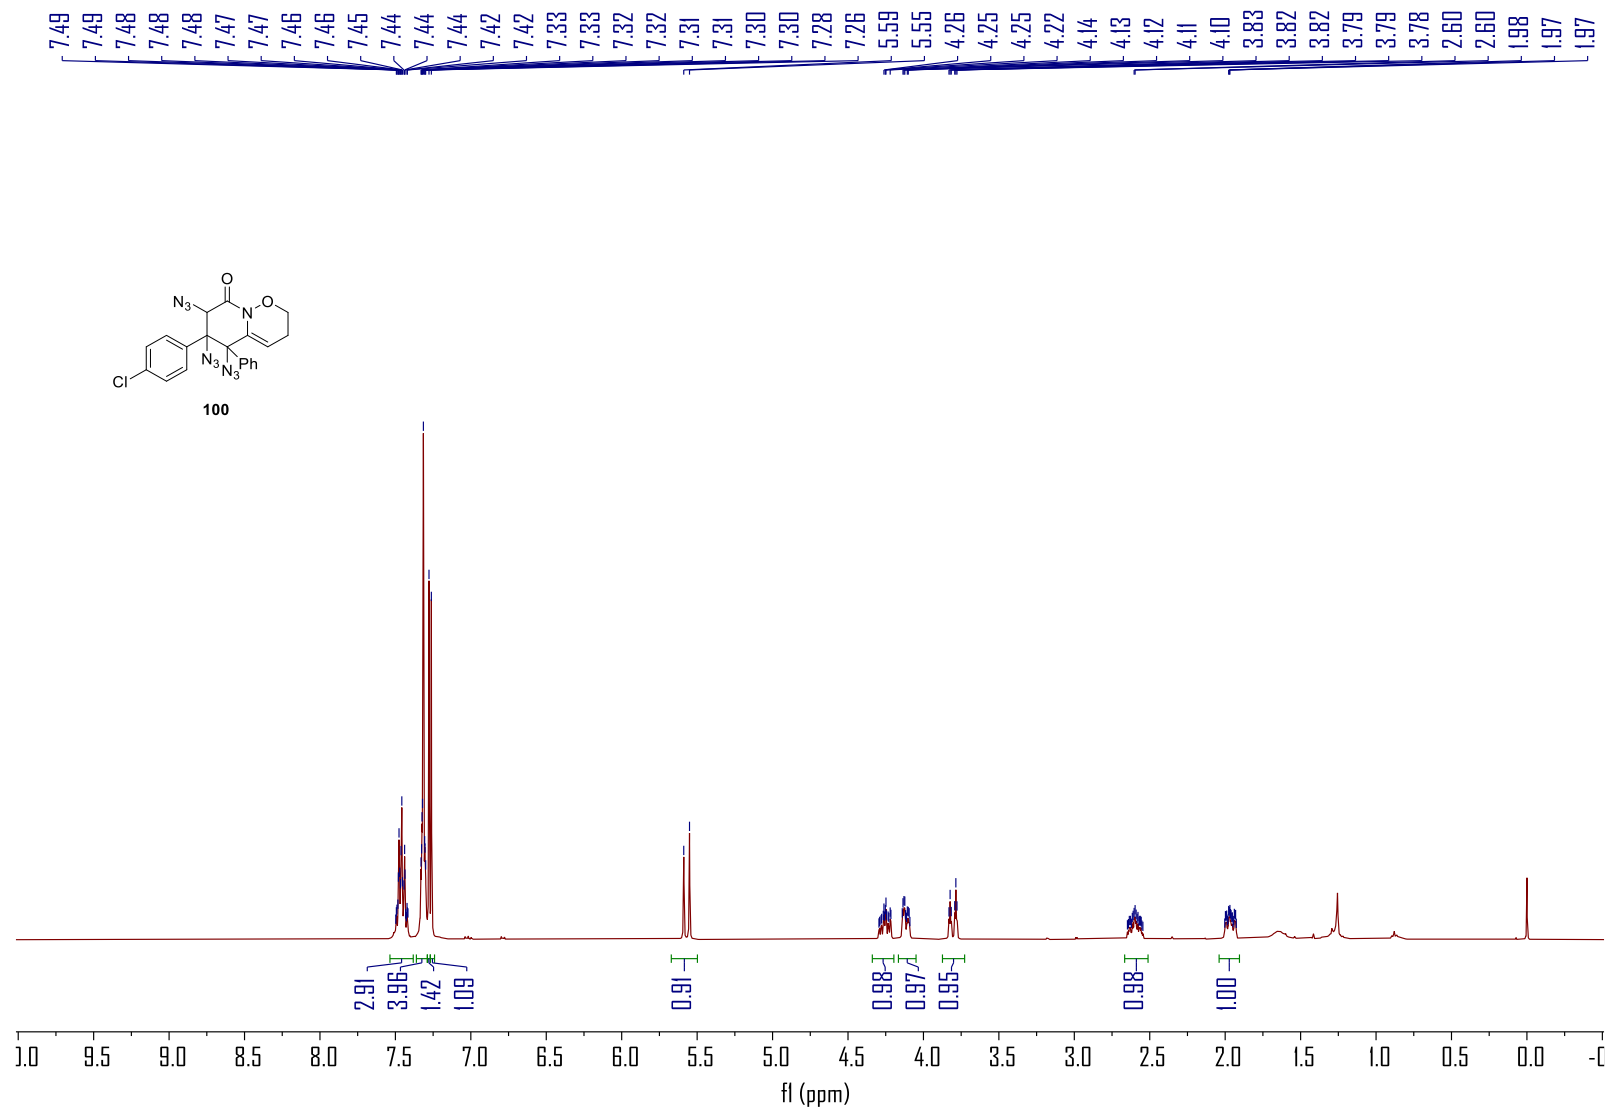

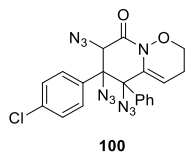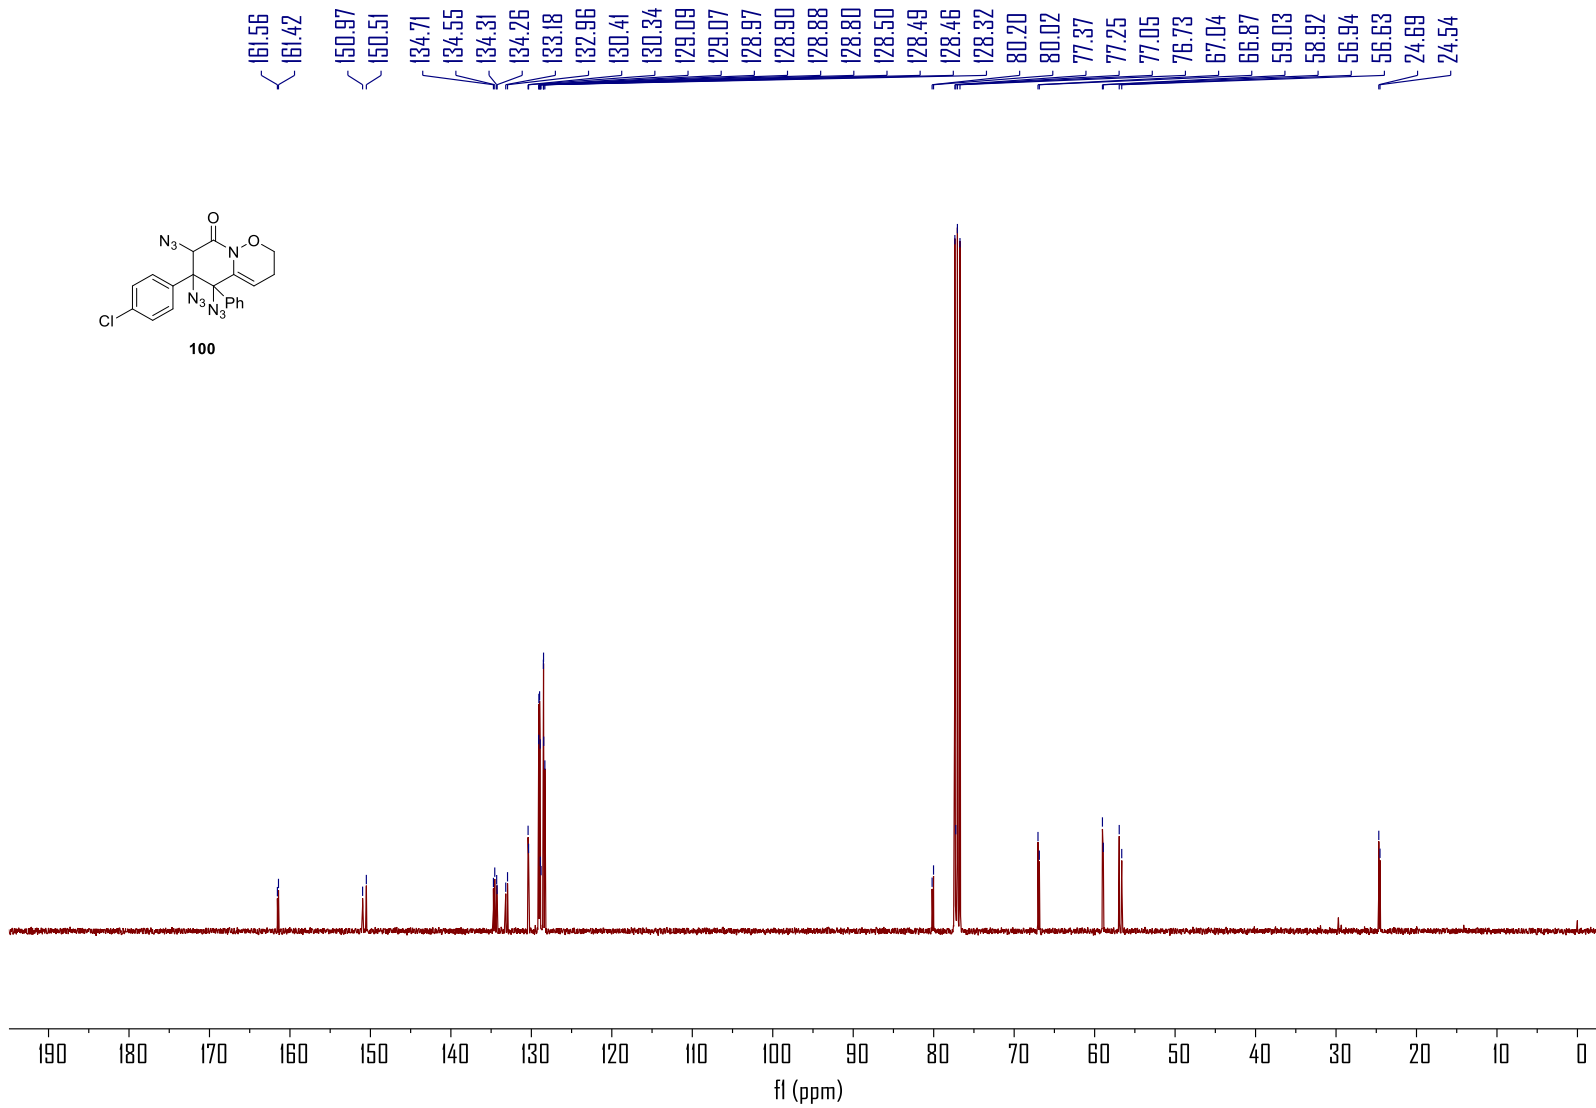

Supplement: d1sc05429e1.pdf [file d1sc05429e1.pdf]
